# Supplementary material
Source: PubMed Central journal article supplement (PMC4833263)

# ACLY\_HUMAN (SVPSPR)

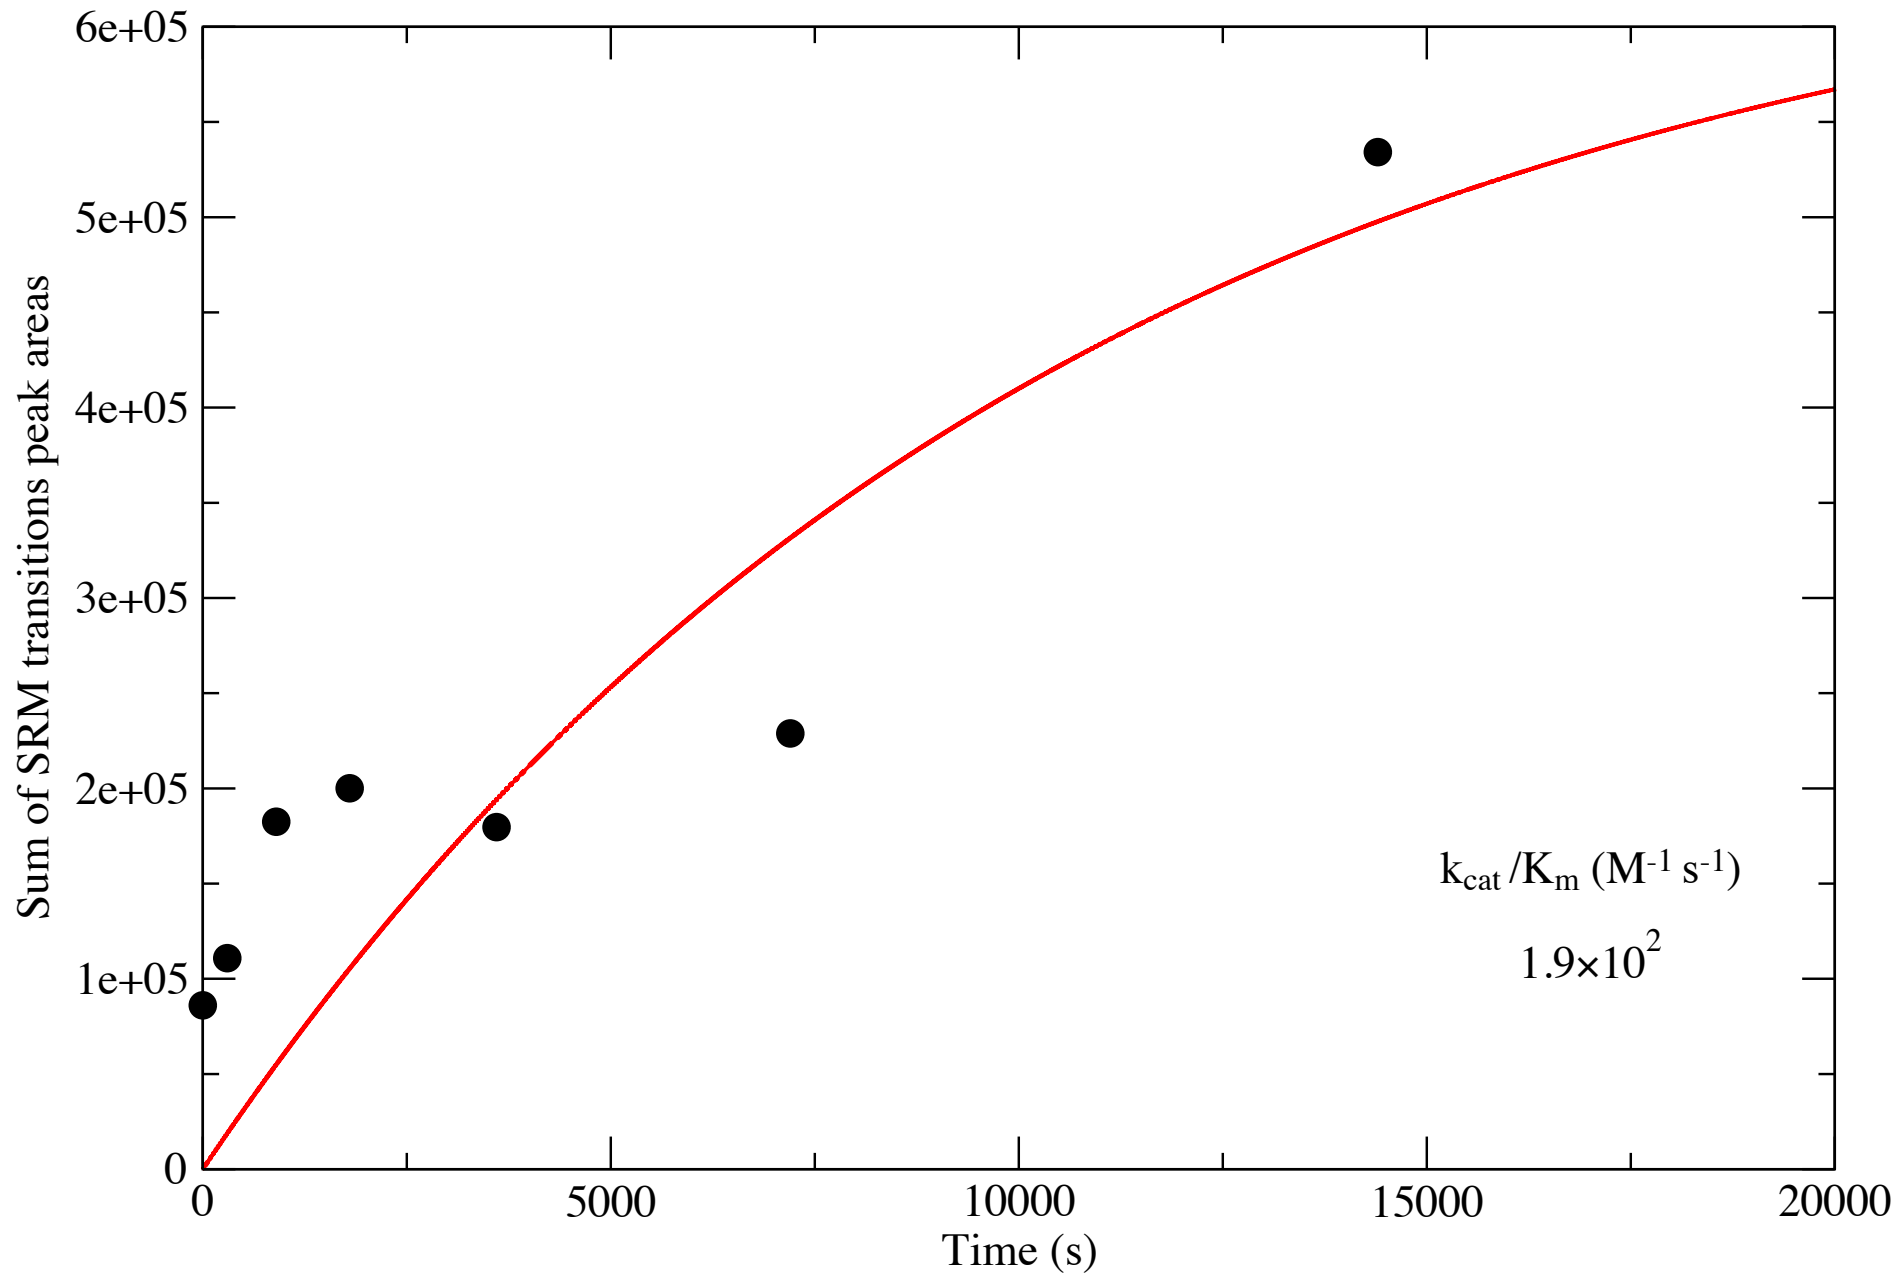

# ACTB\_HUMAN (GQVITIGNER)

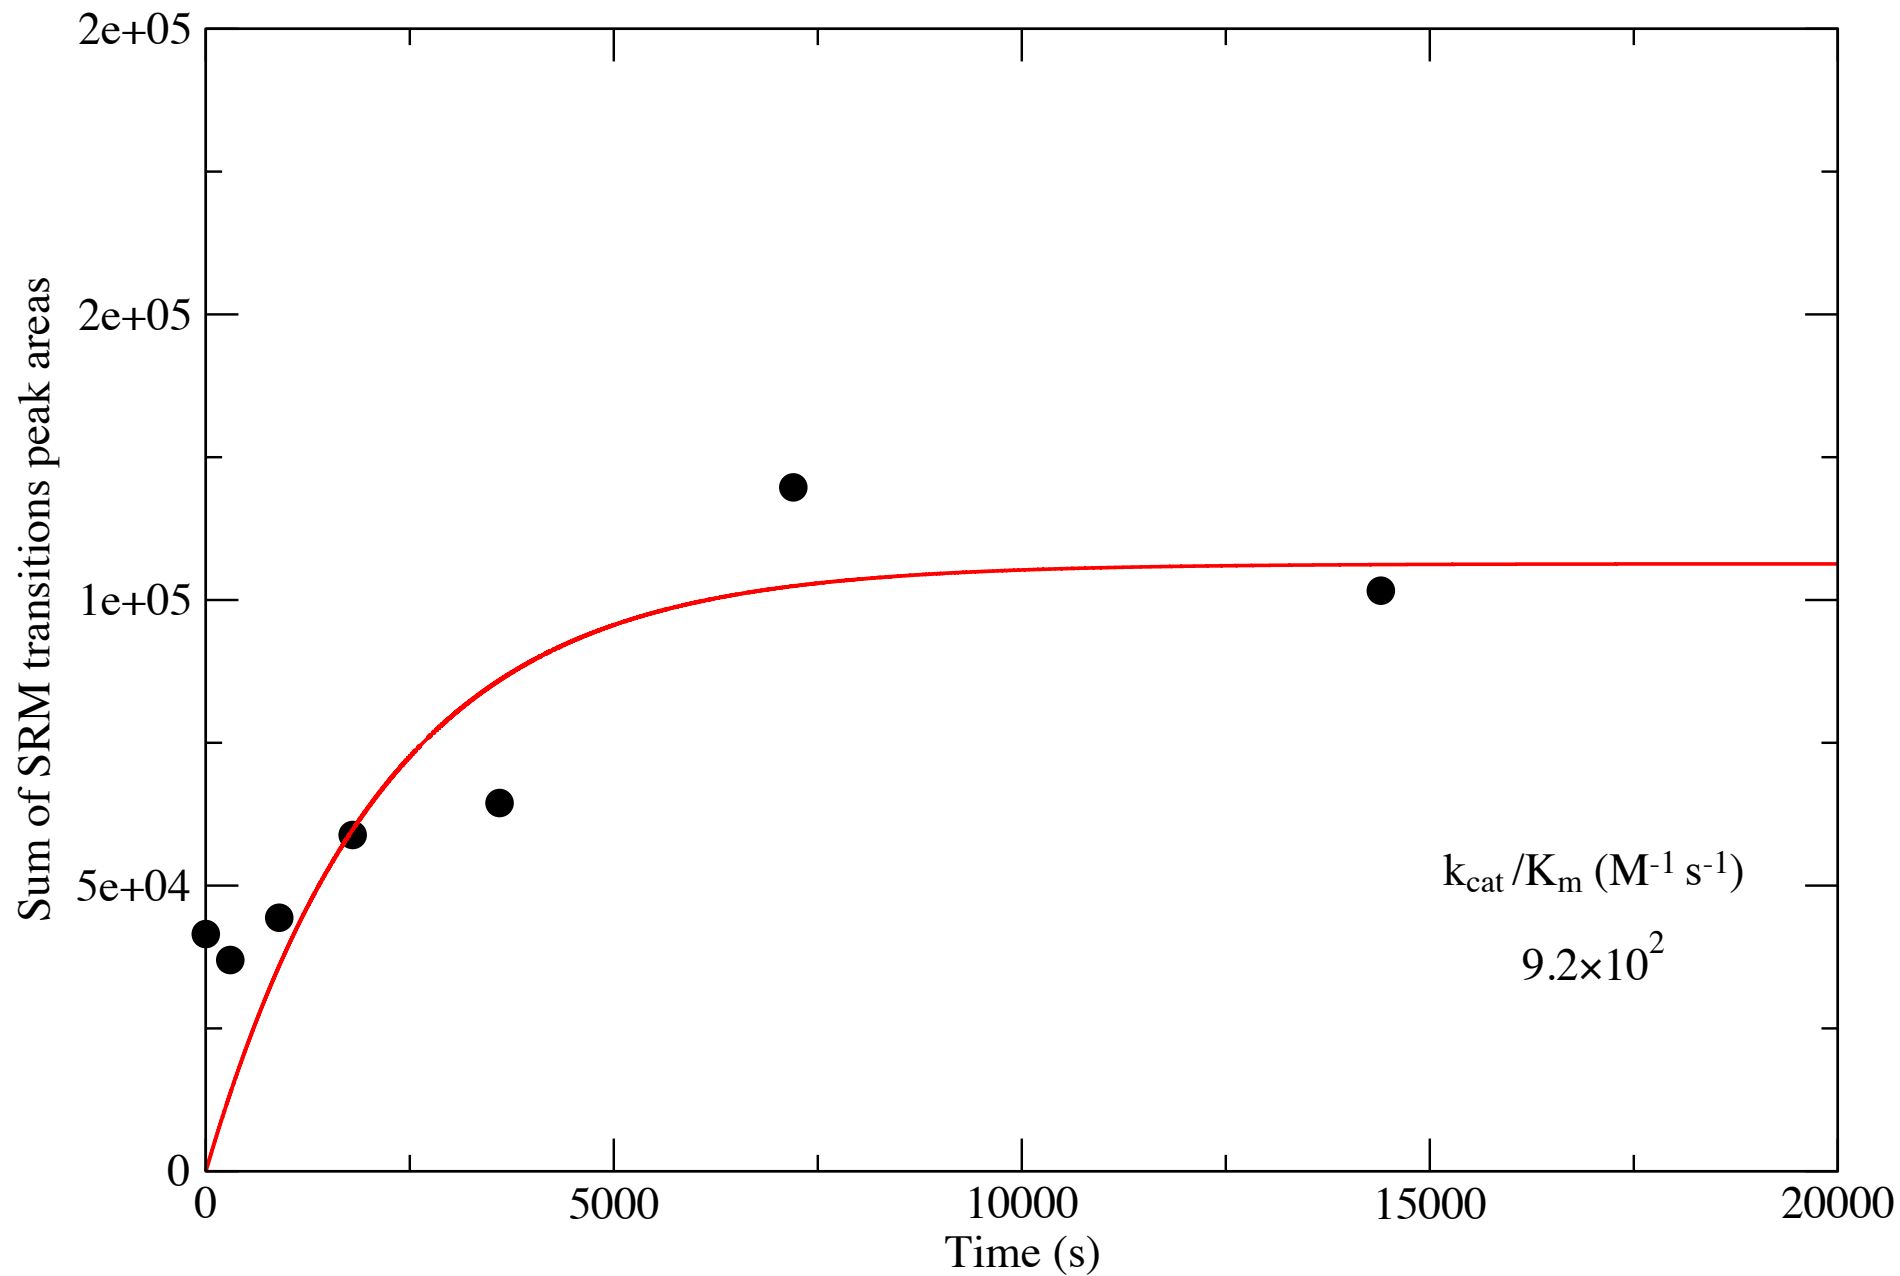

# ACTB\_HUMAN (GVTHTVPIYEGYALPHAILR)

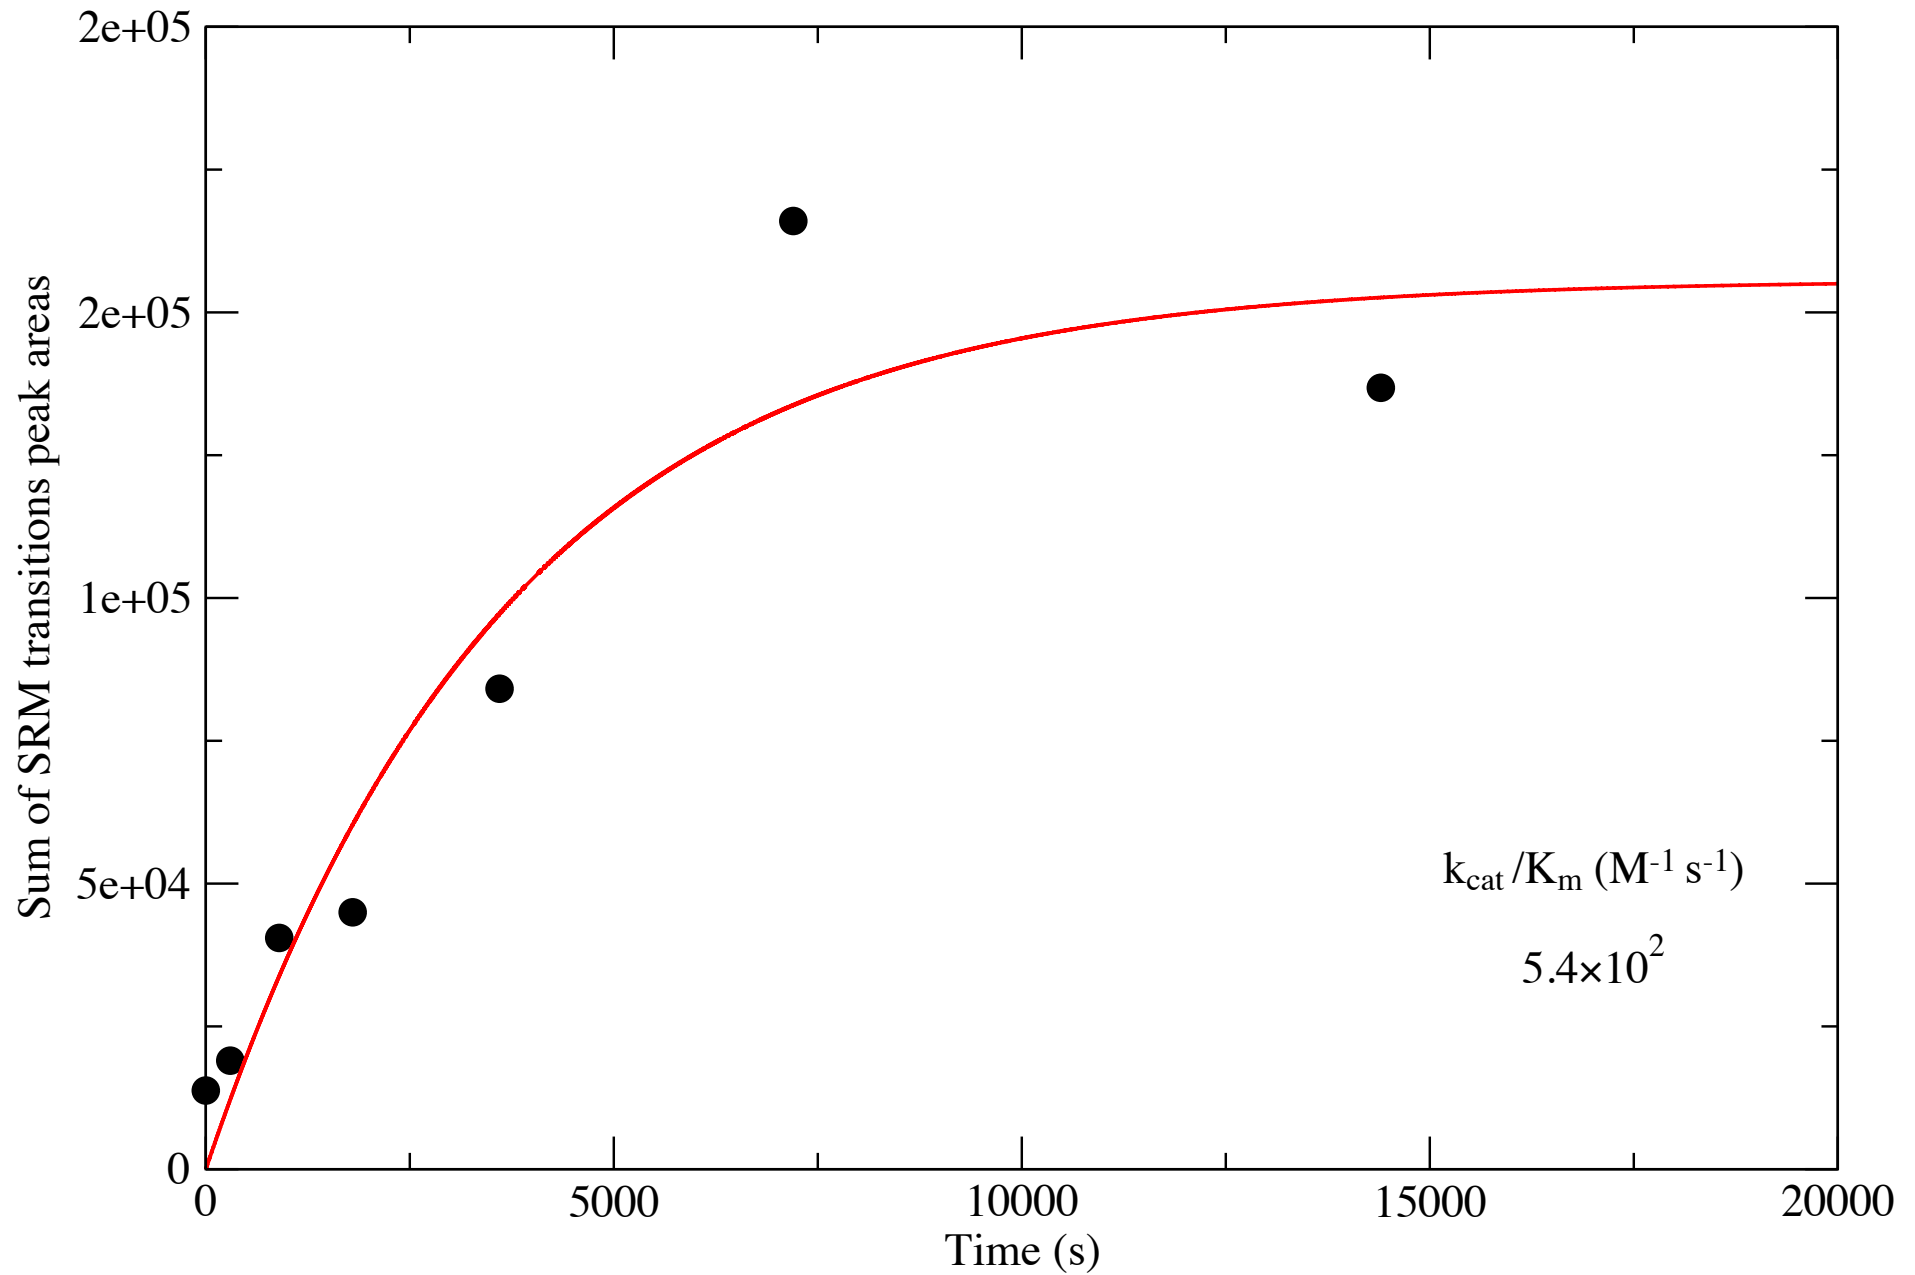

# AKNA\_HUMAN (GVAATPGKAEATR)

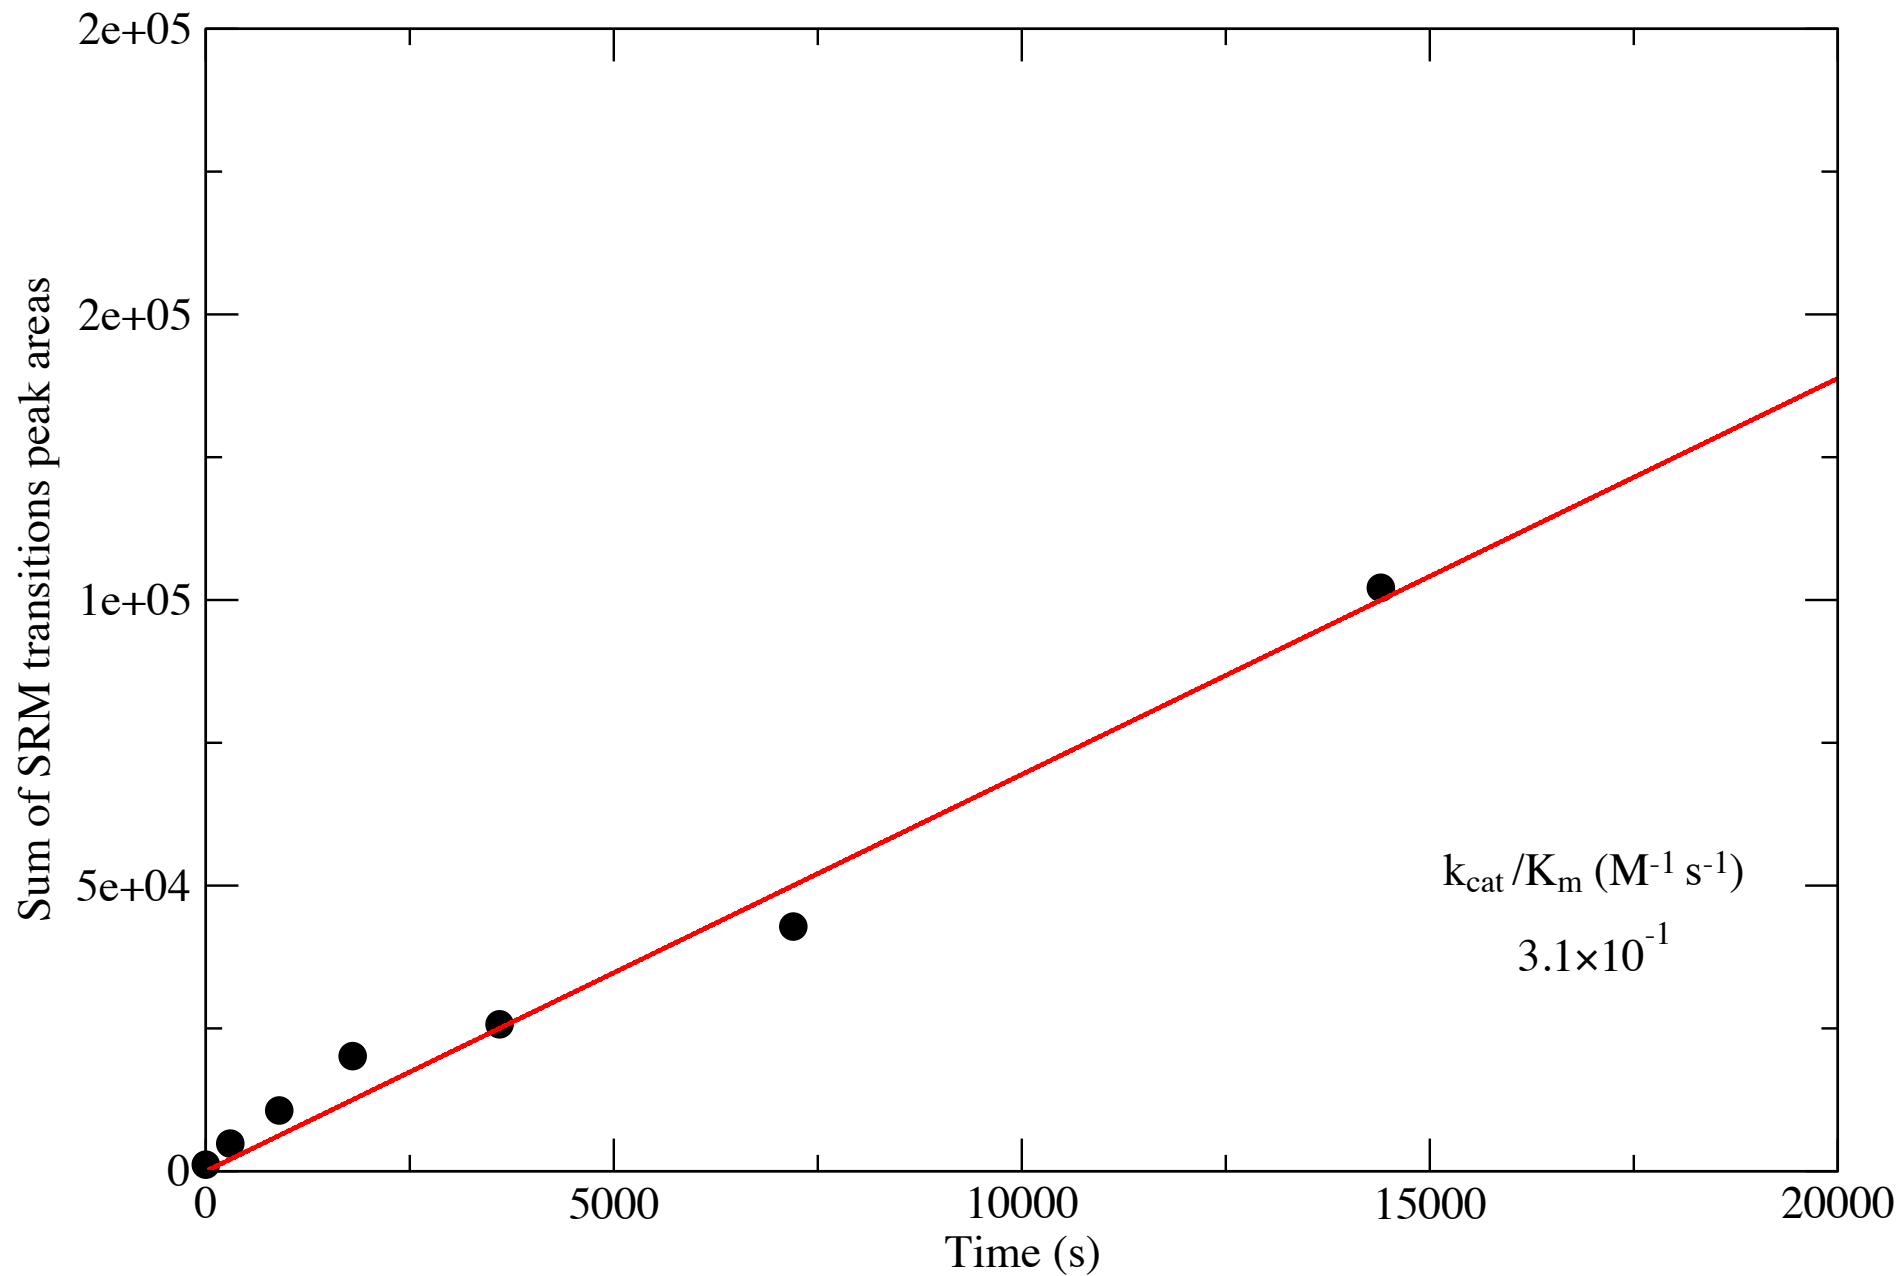

# BAG6\_HUMAN (GASAETEPWAAA VPPEWVPPIQQDIQSQRK)

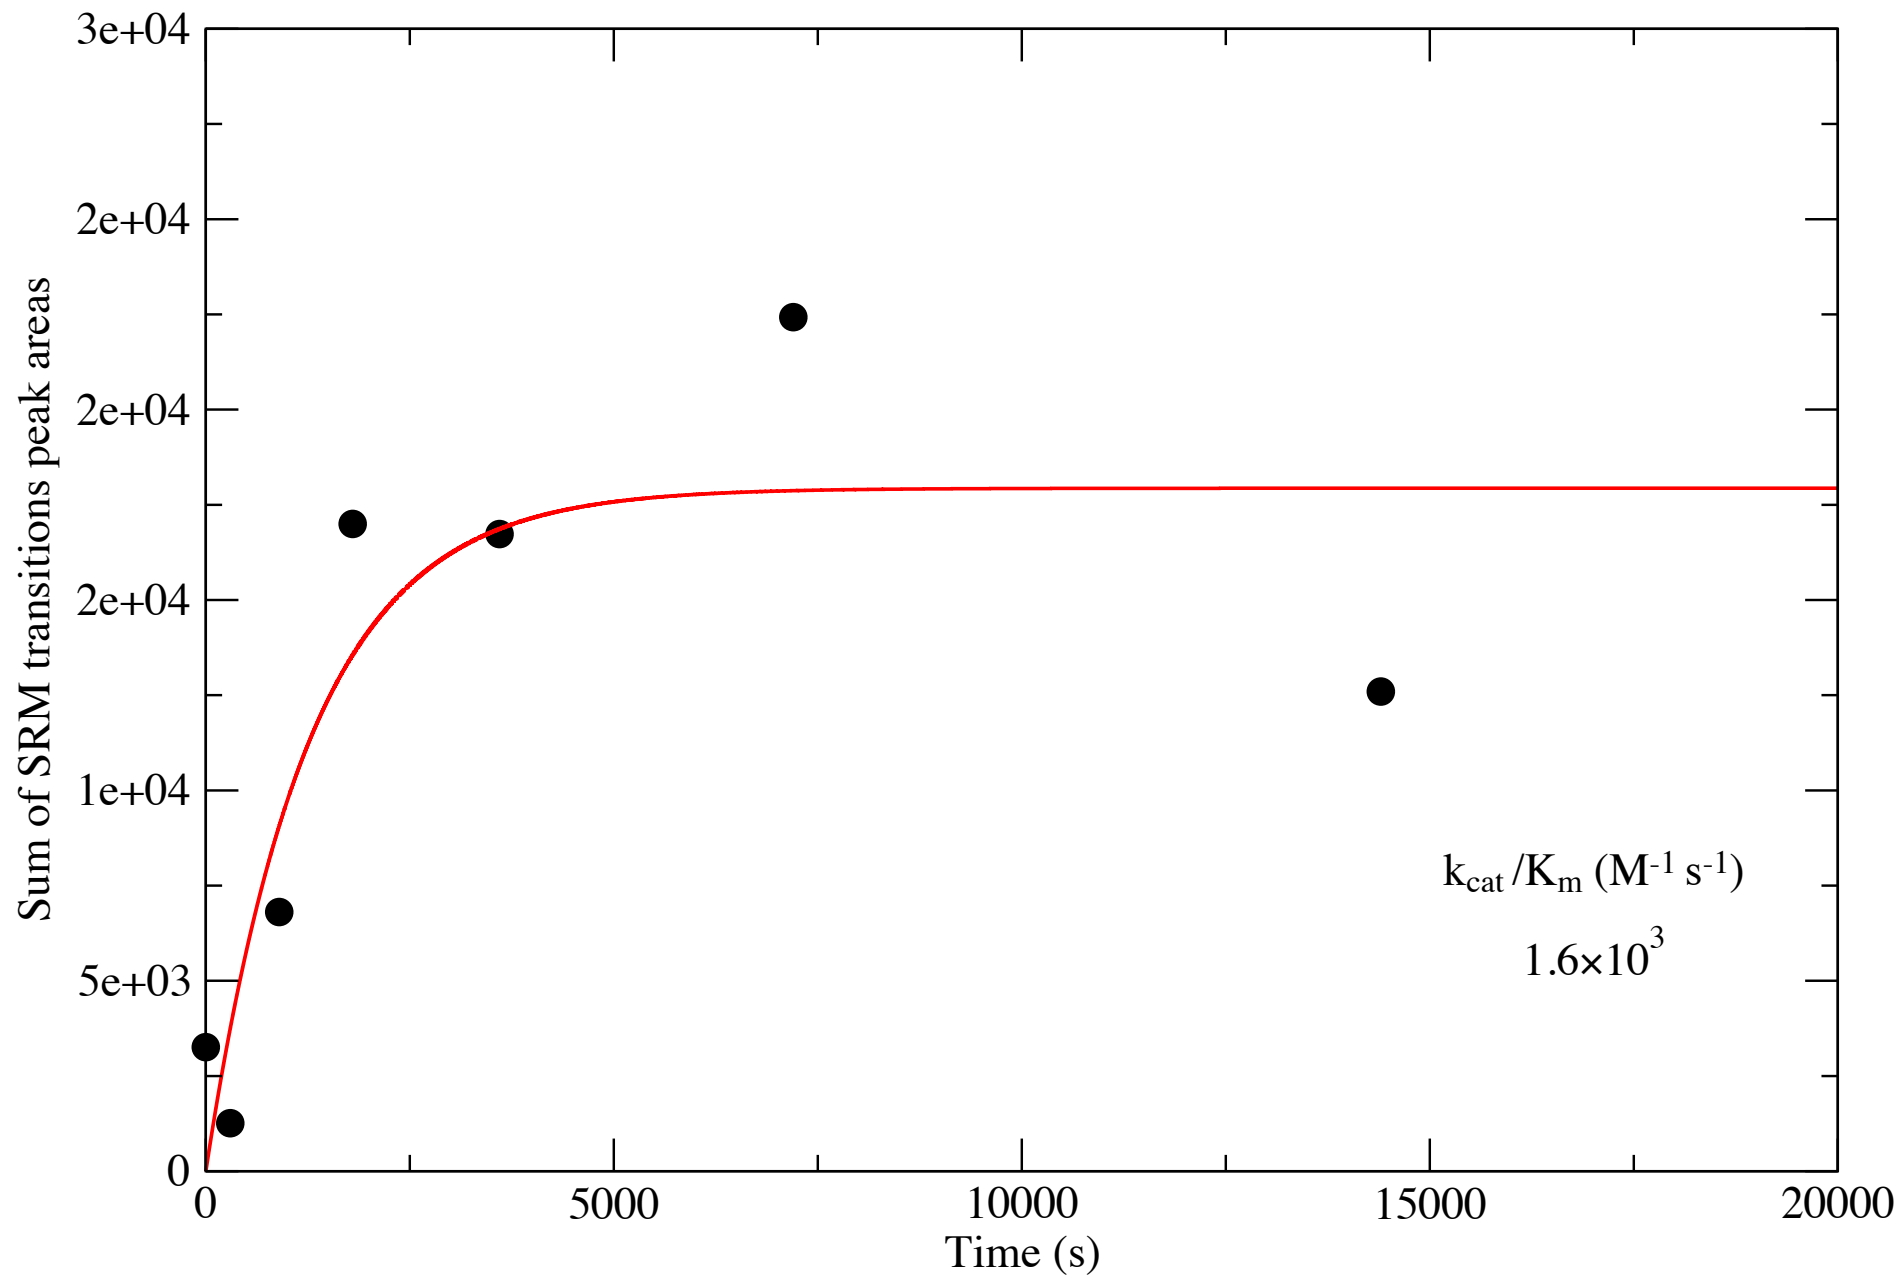

# CC50A\_HUMAN (GGPPCAPGGTAK)

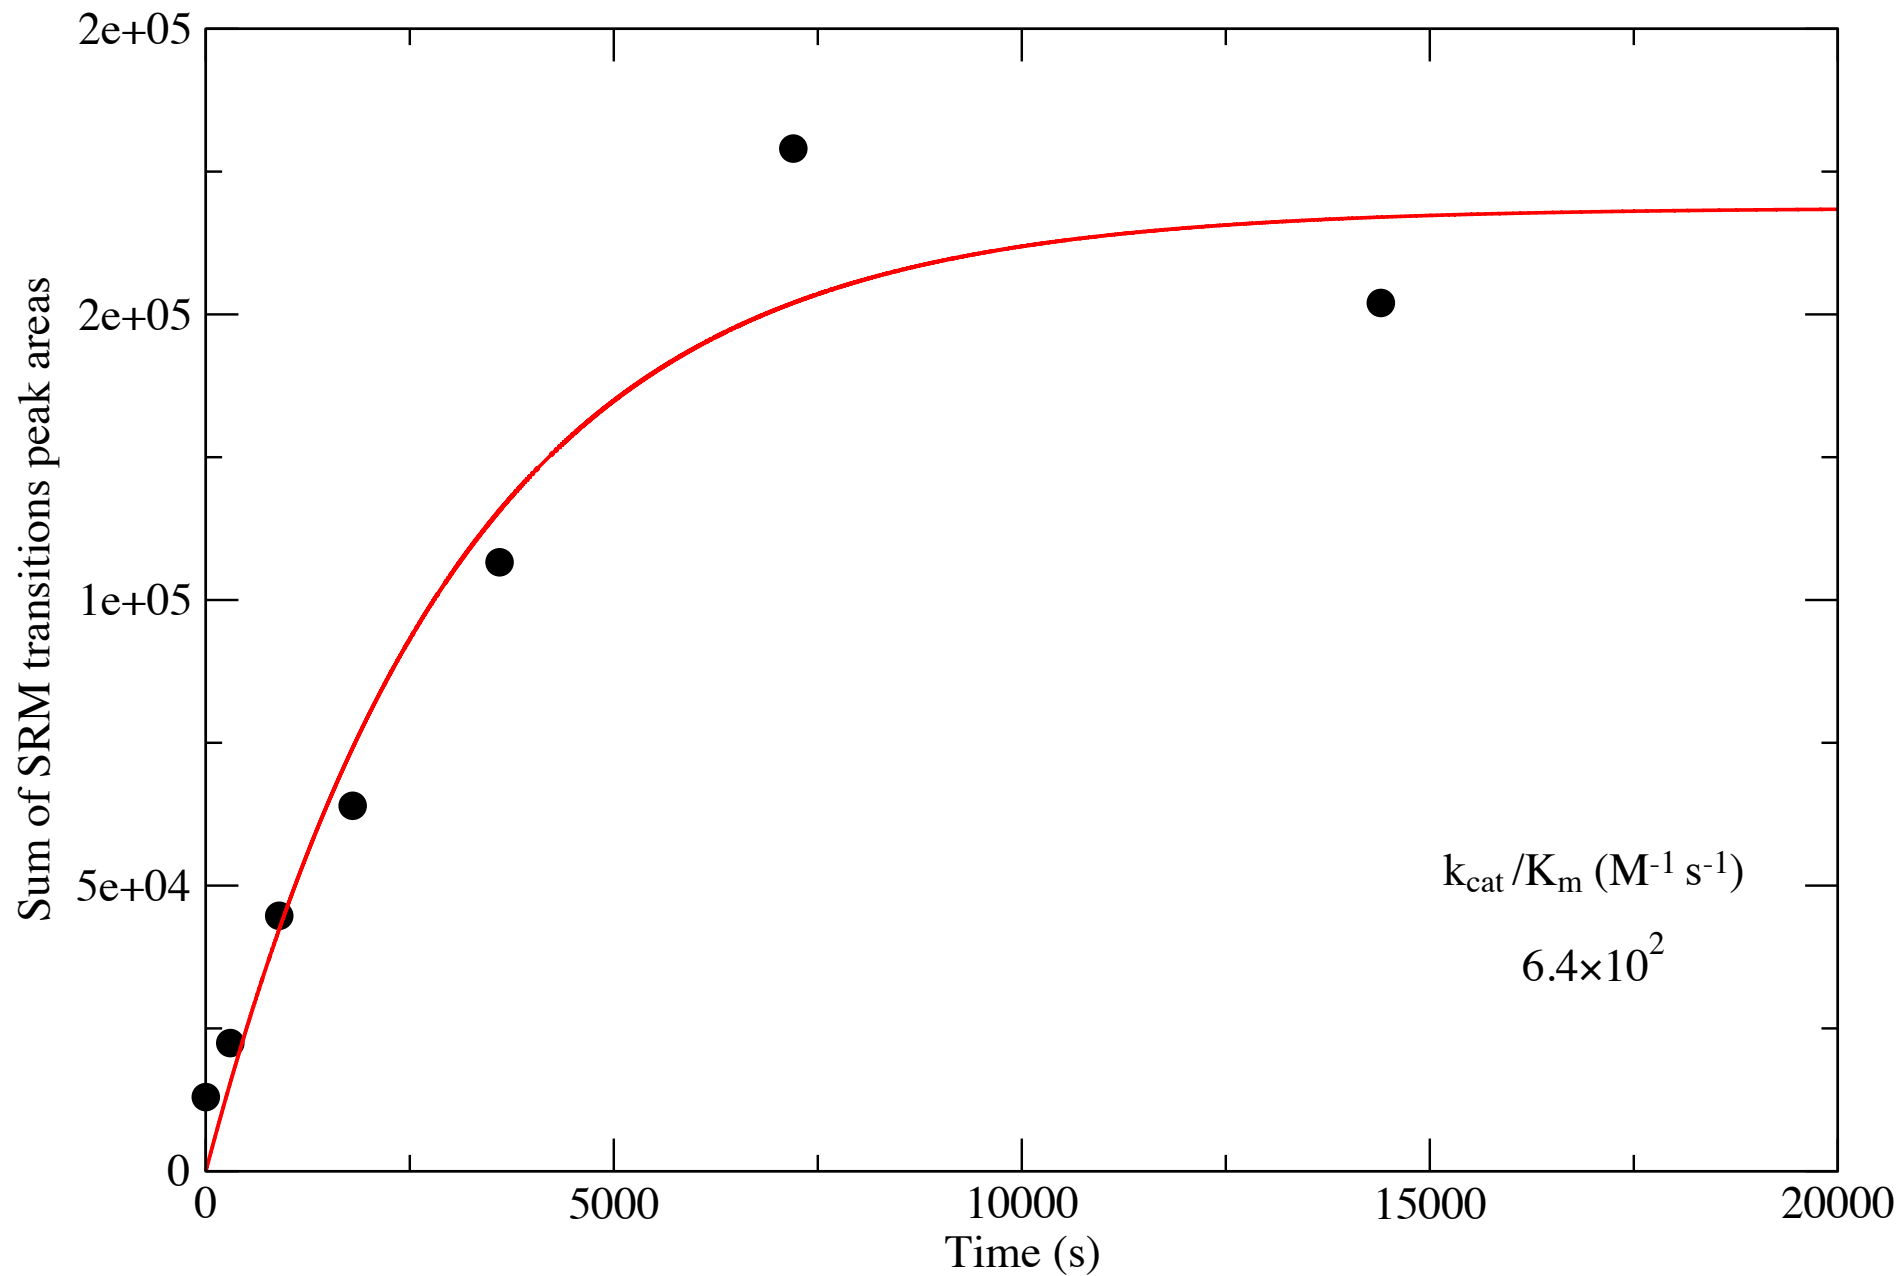

# CLAP1\_HUMAN (GGAASPATEGRGGSEVEGGR)

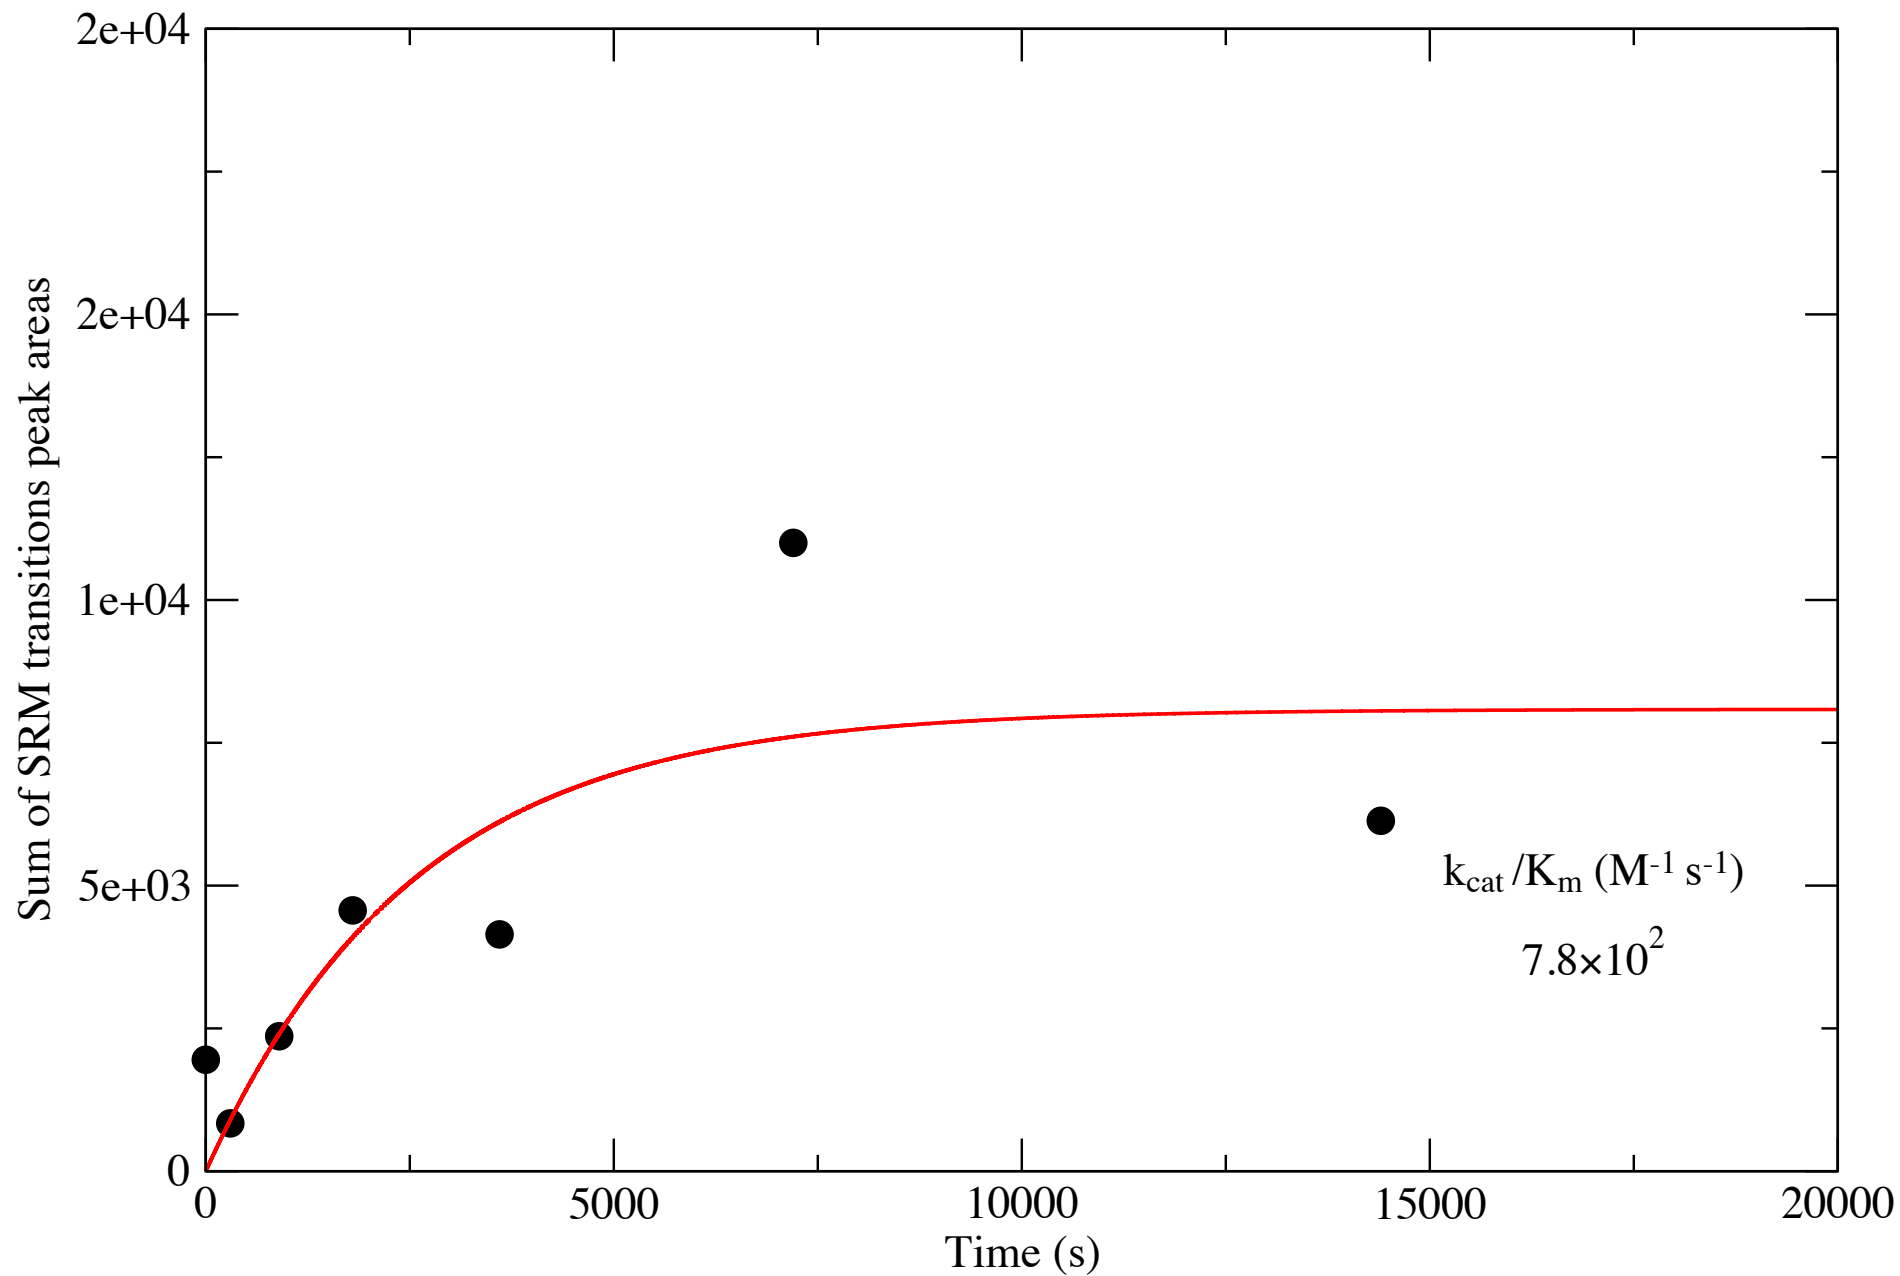

# CR025\_HUMAN (GVADSTVISSMPCLLMELRR)

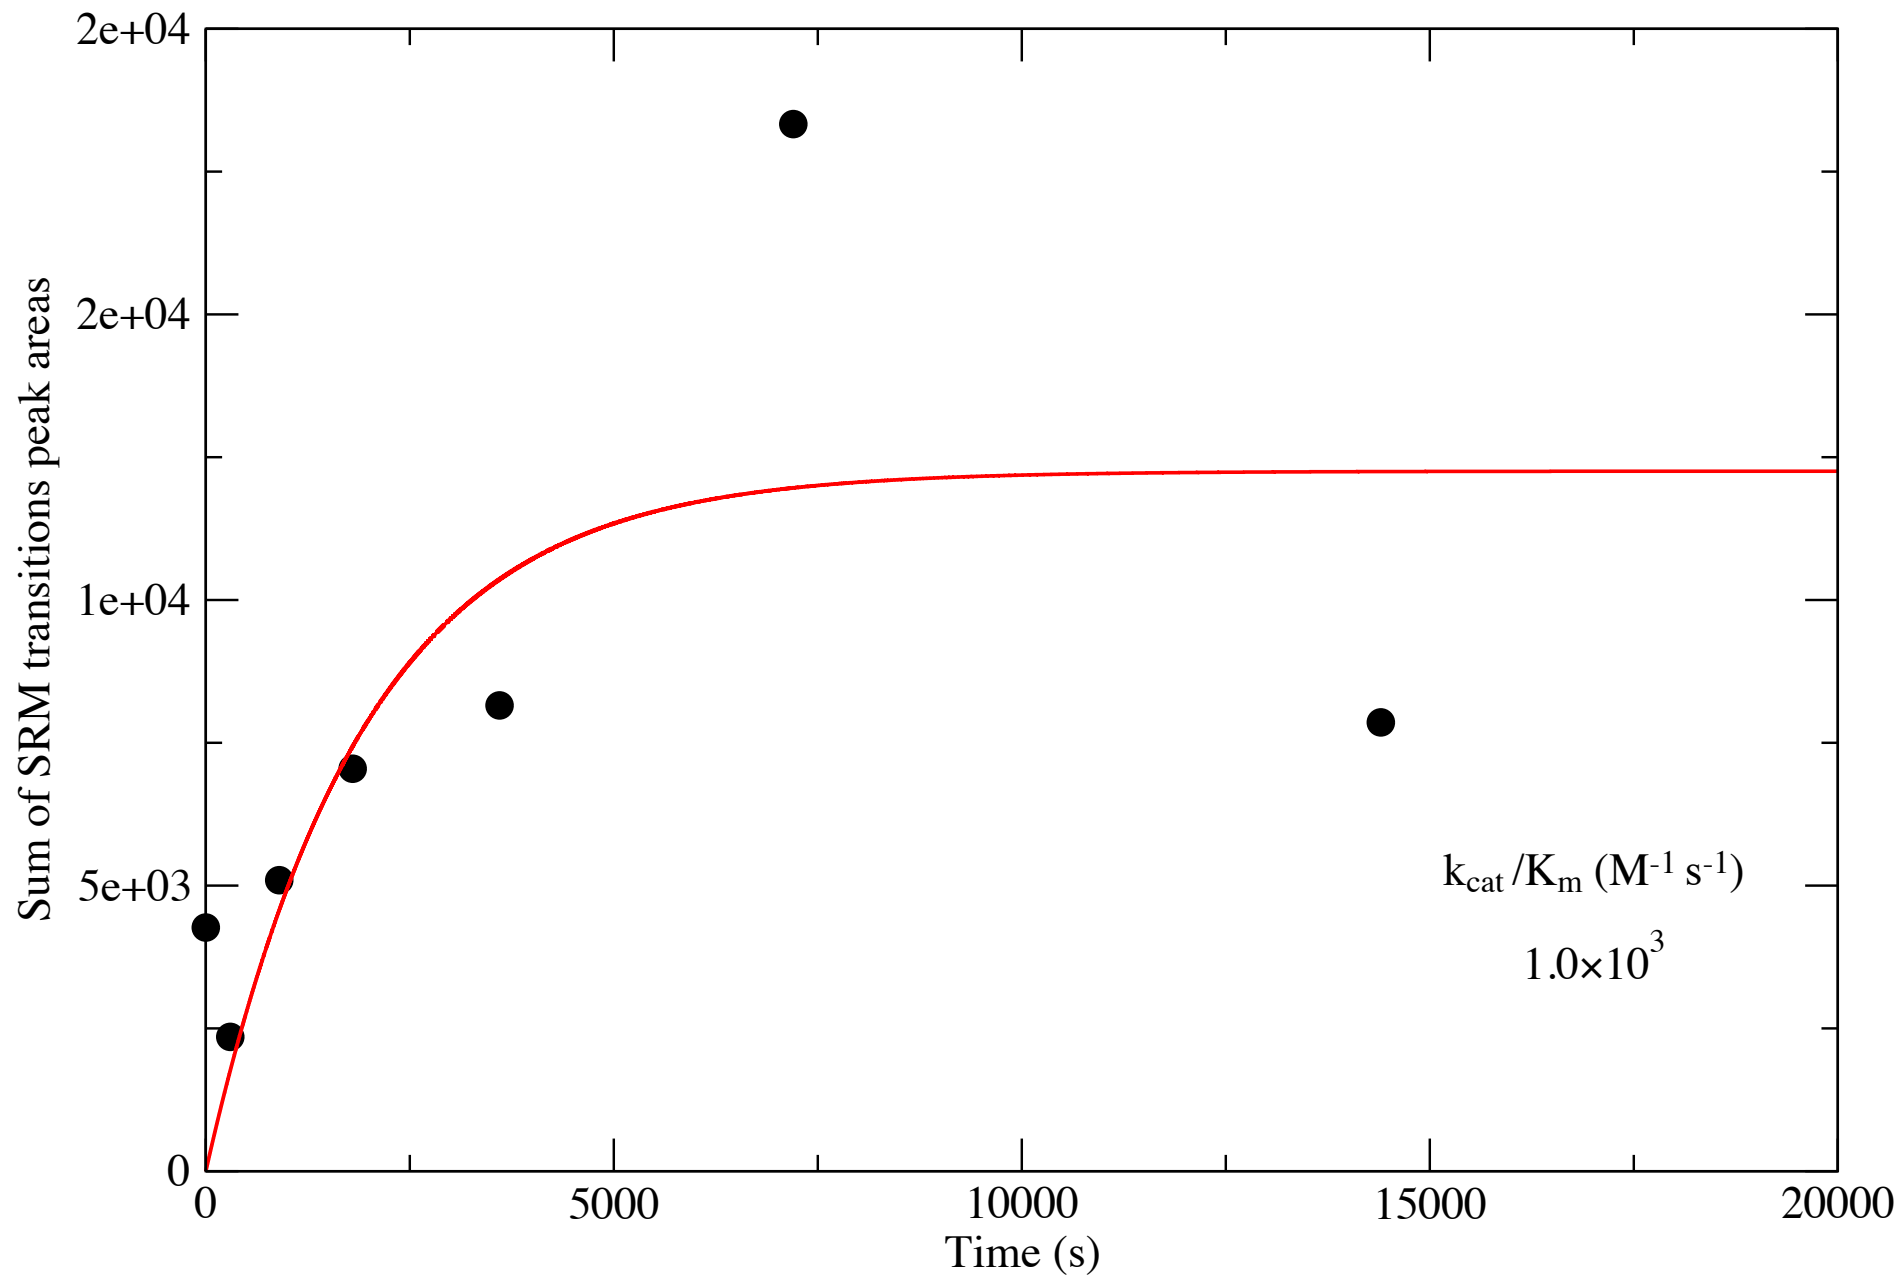



# CTU2\_HUMAN (SATAFGAQTSSR)

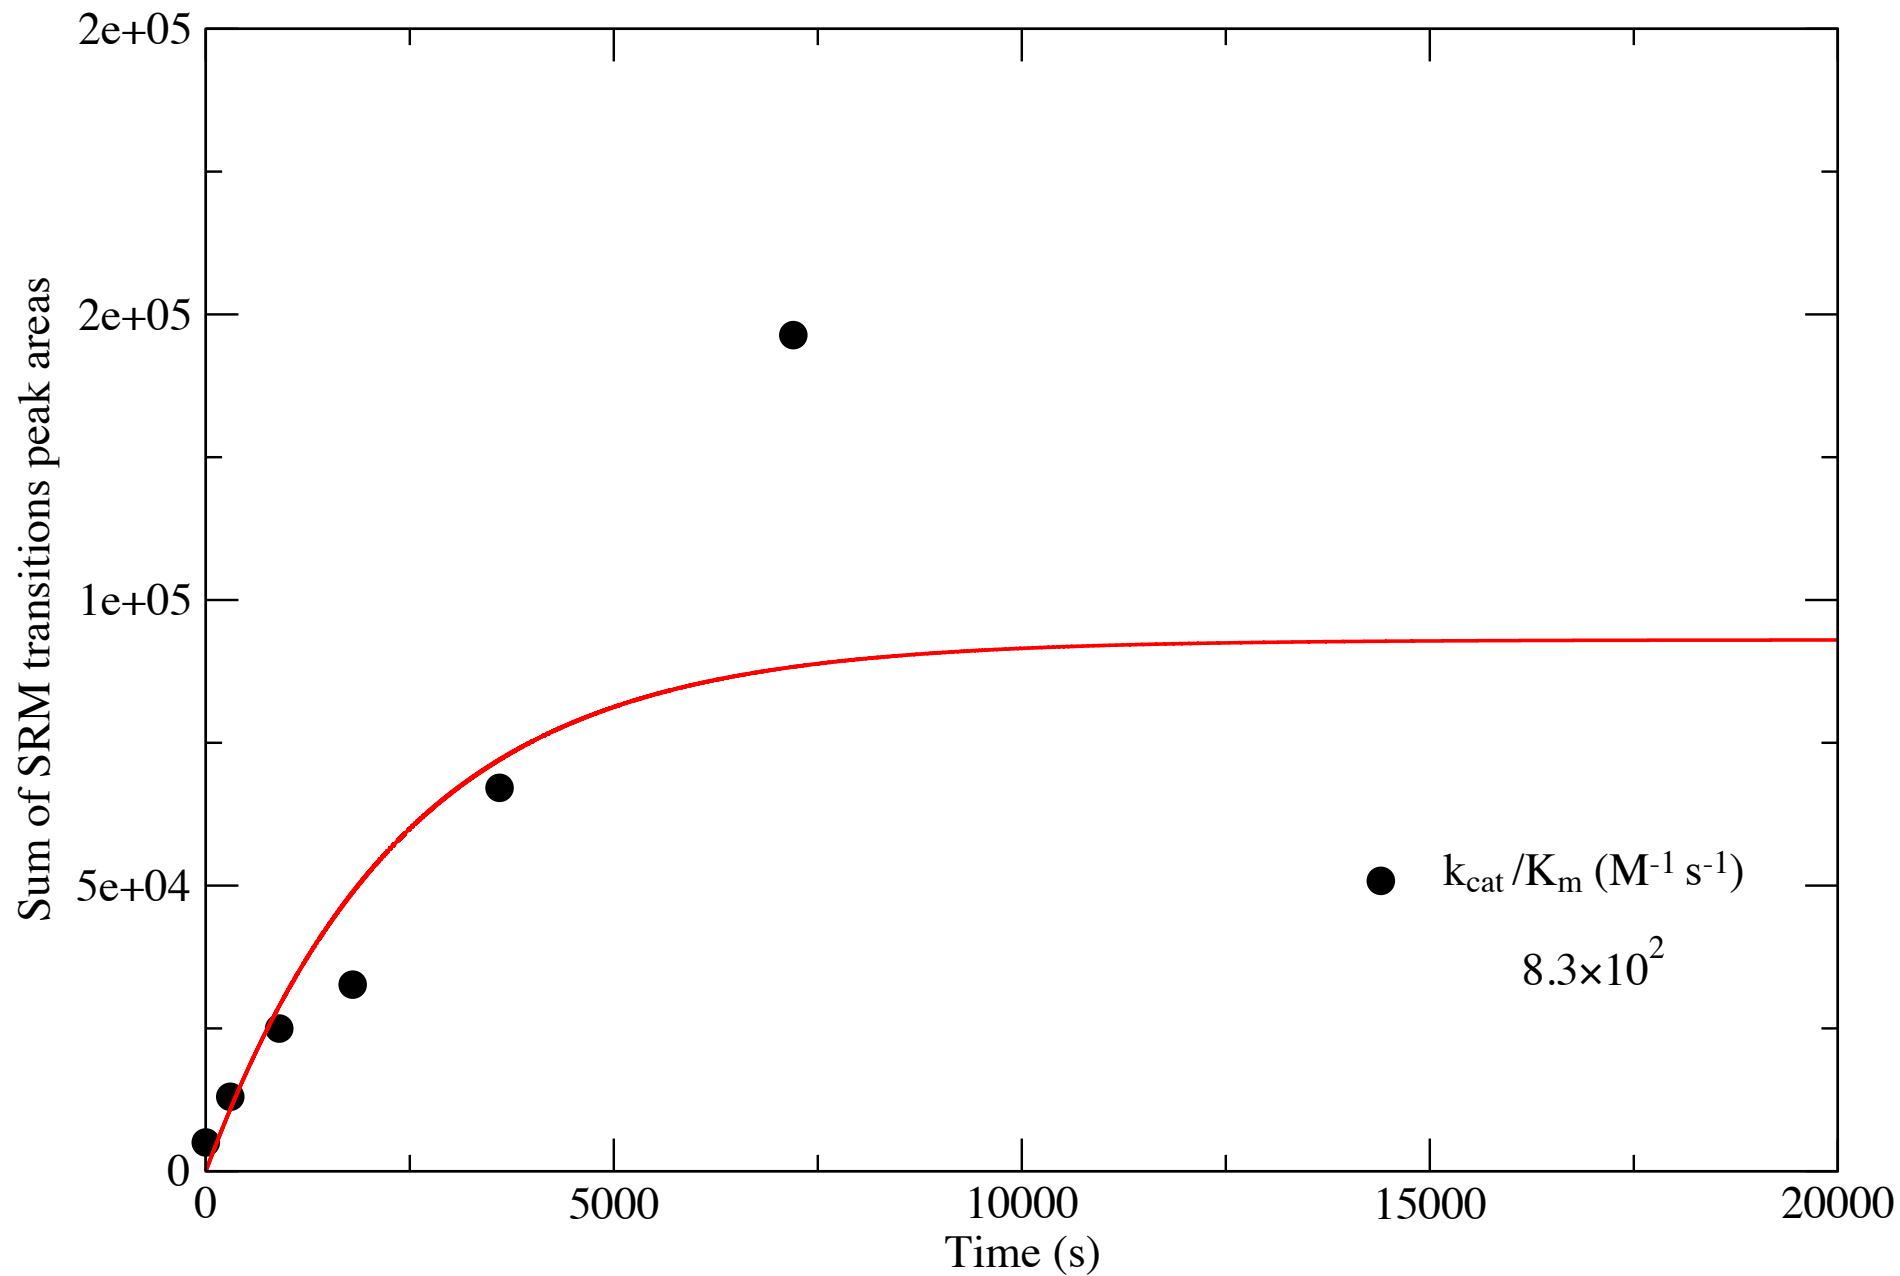

# DGCR8\_HUMAN (SMGADPGPPDEKDPPLGAEAAPGALGQVK)

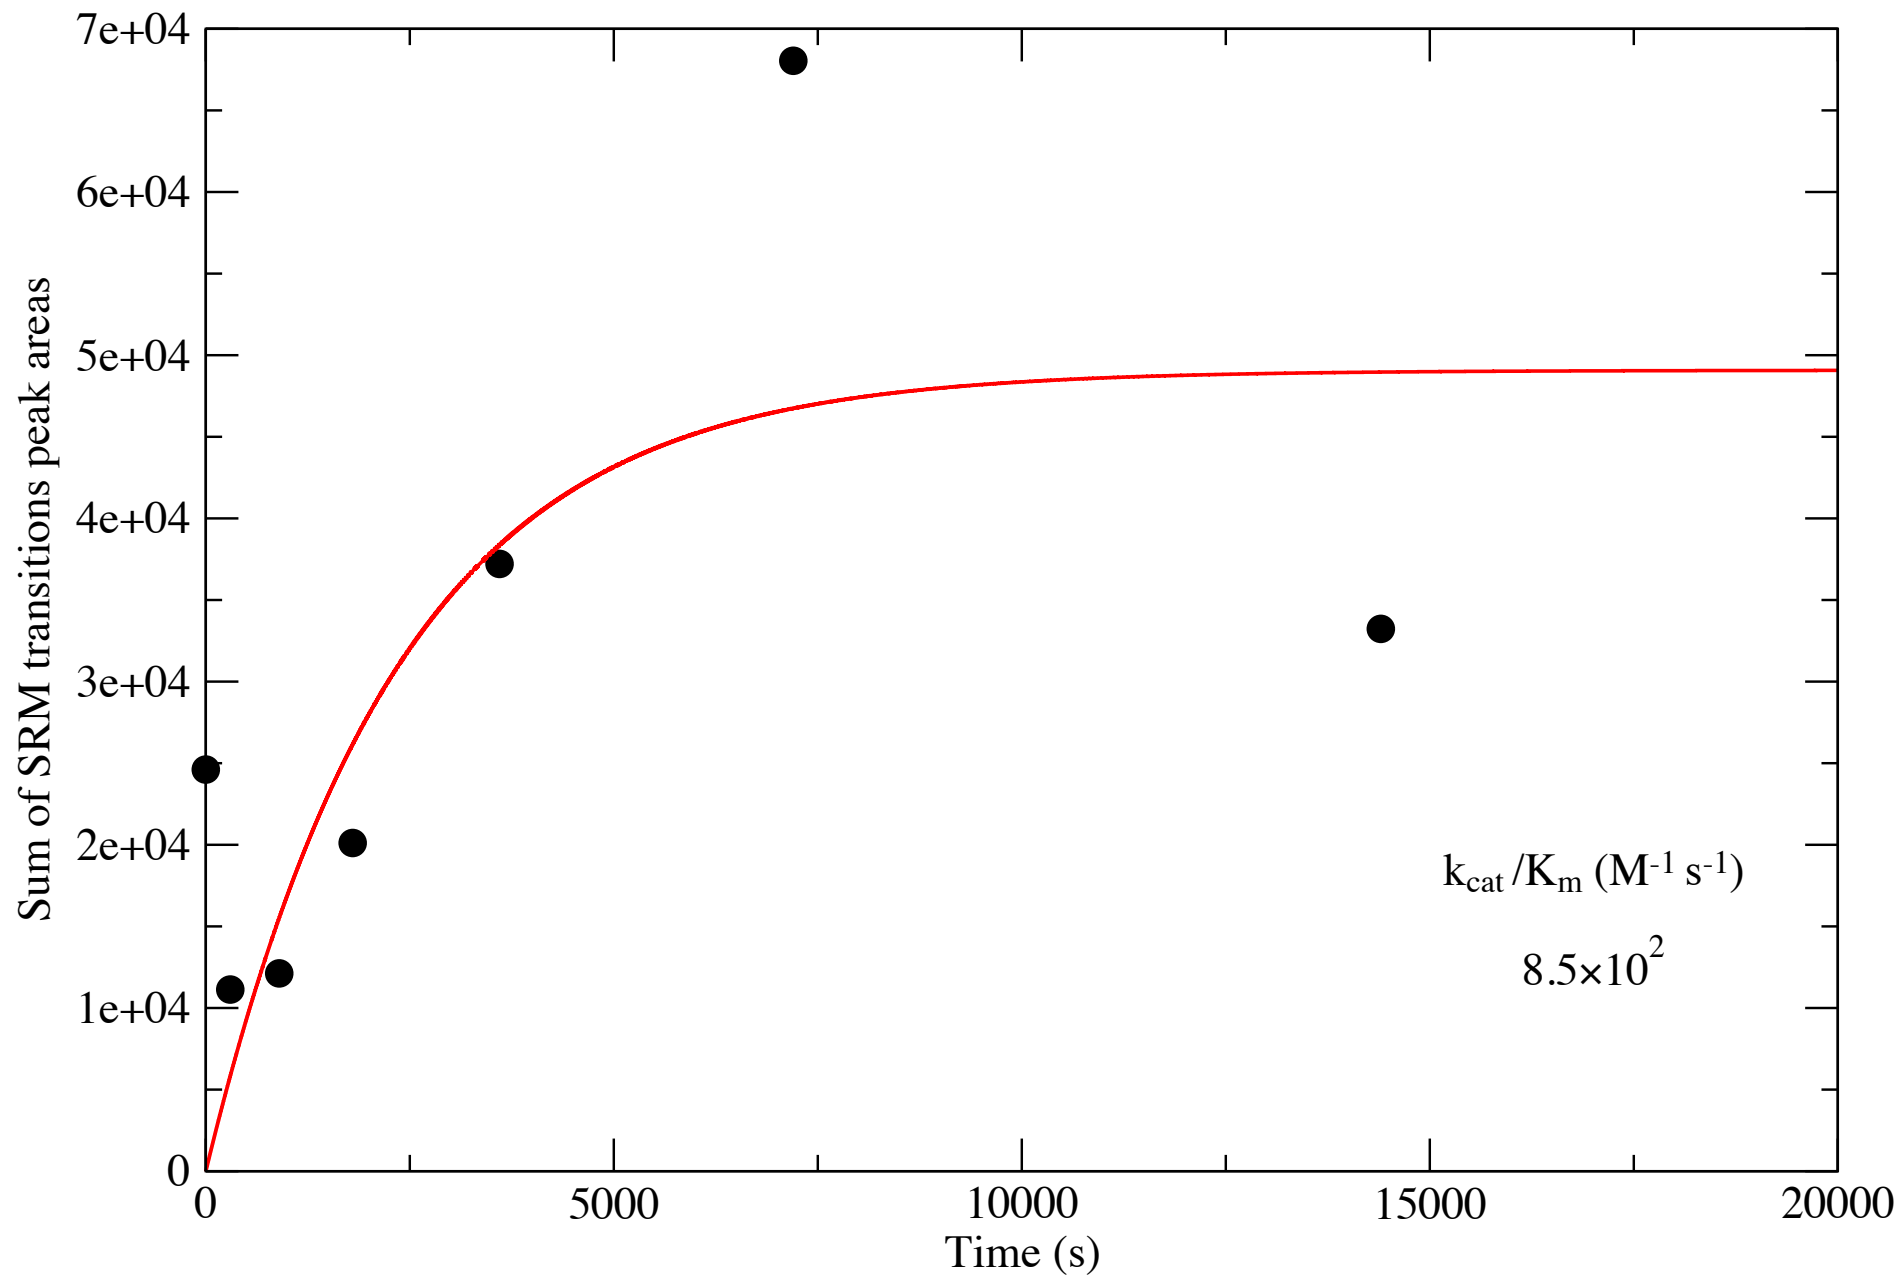

# DHX30\_HUMAN (FLSMTQQDSHAPLRDSR)

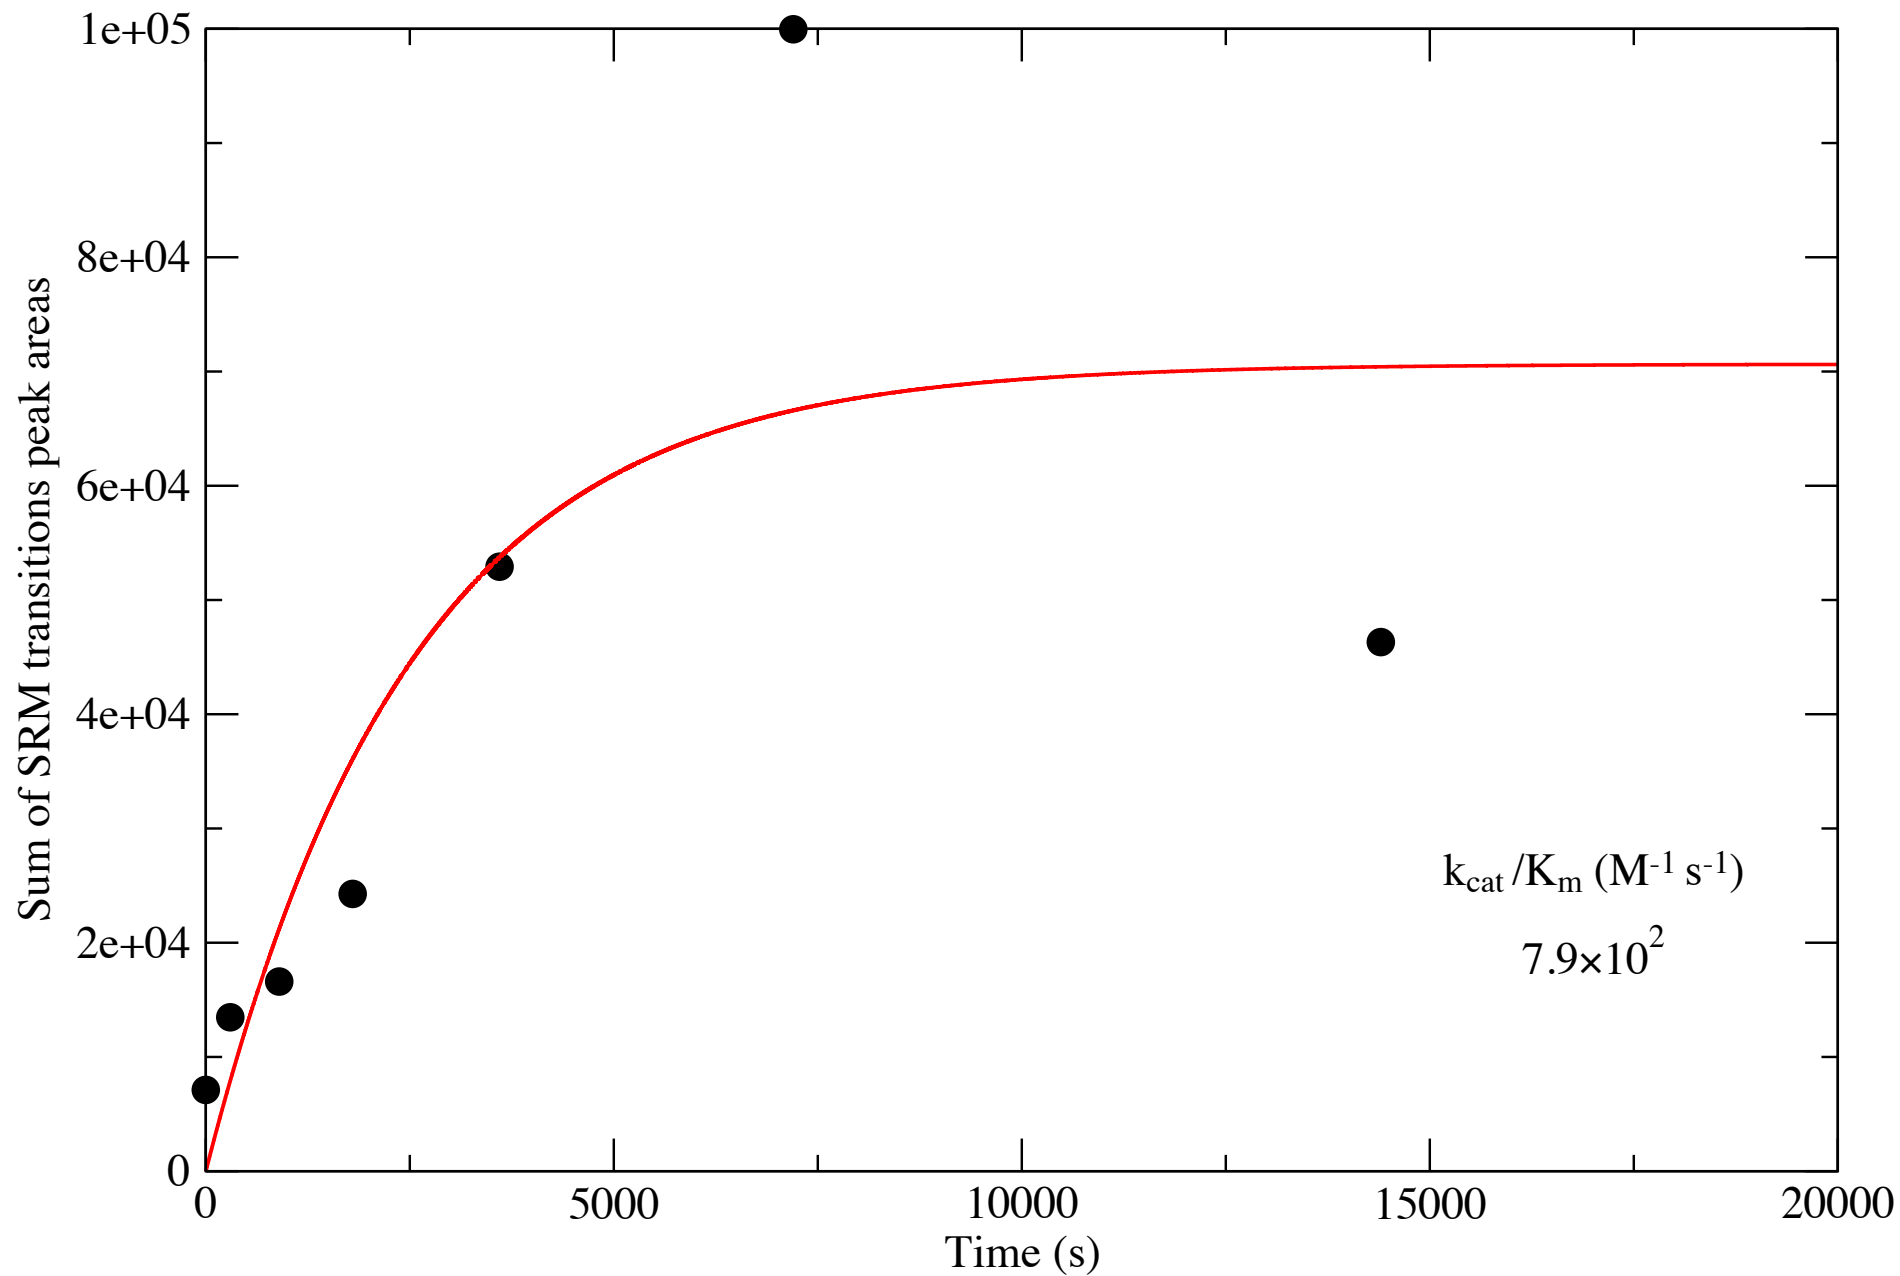

# DSRAD\_HUMAN (GHSQGAPNSDPSLEPEDR)

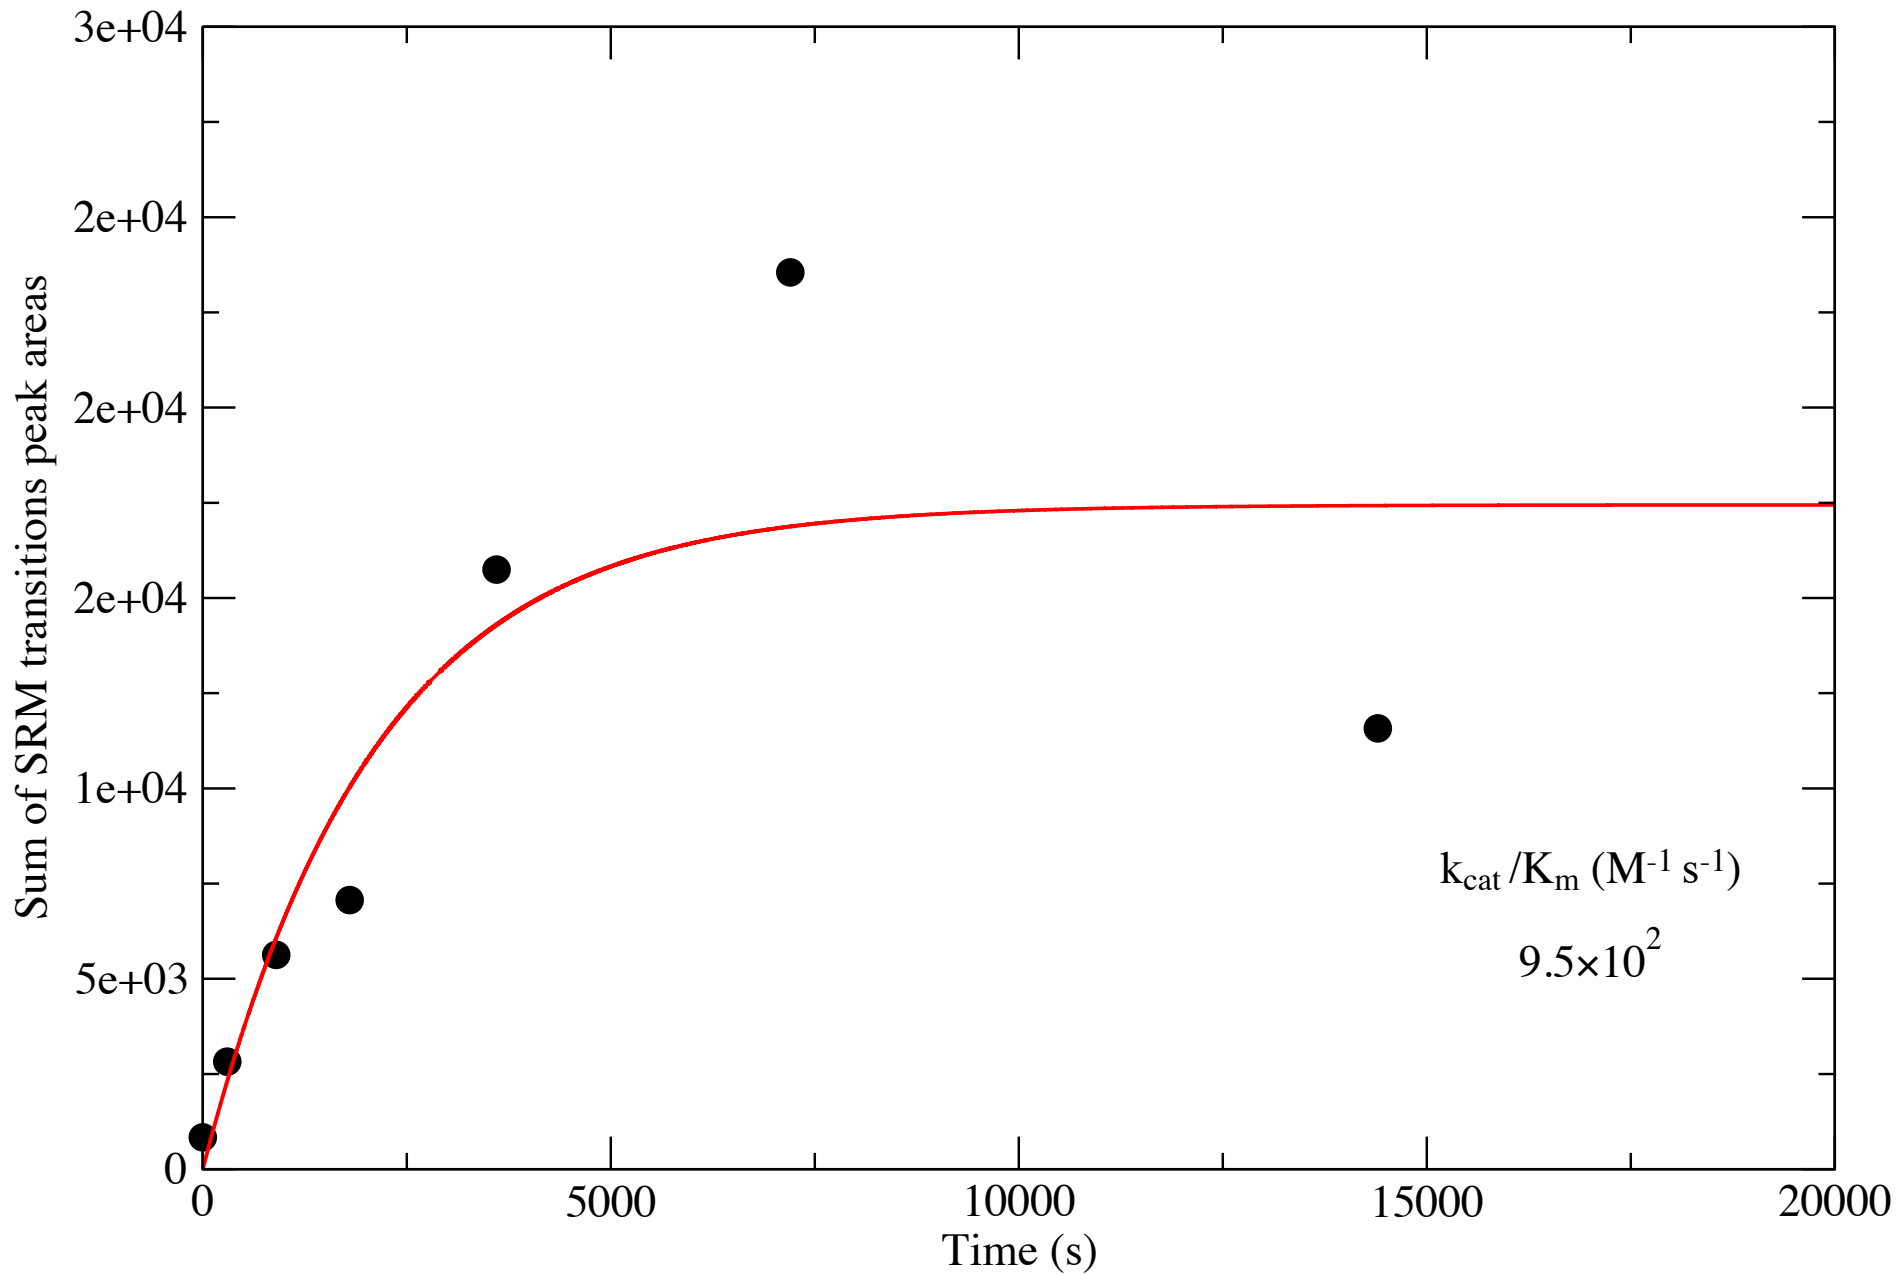

# ENPL\_HUMAN (GLNASQIR)

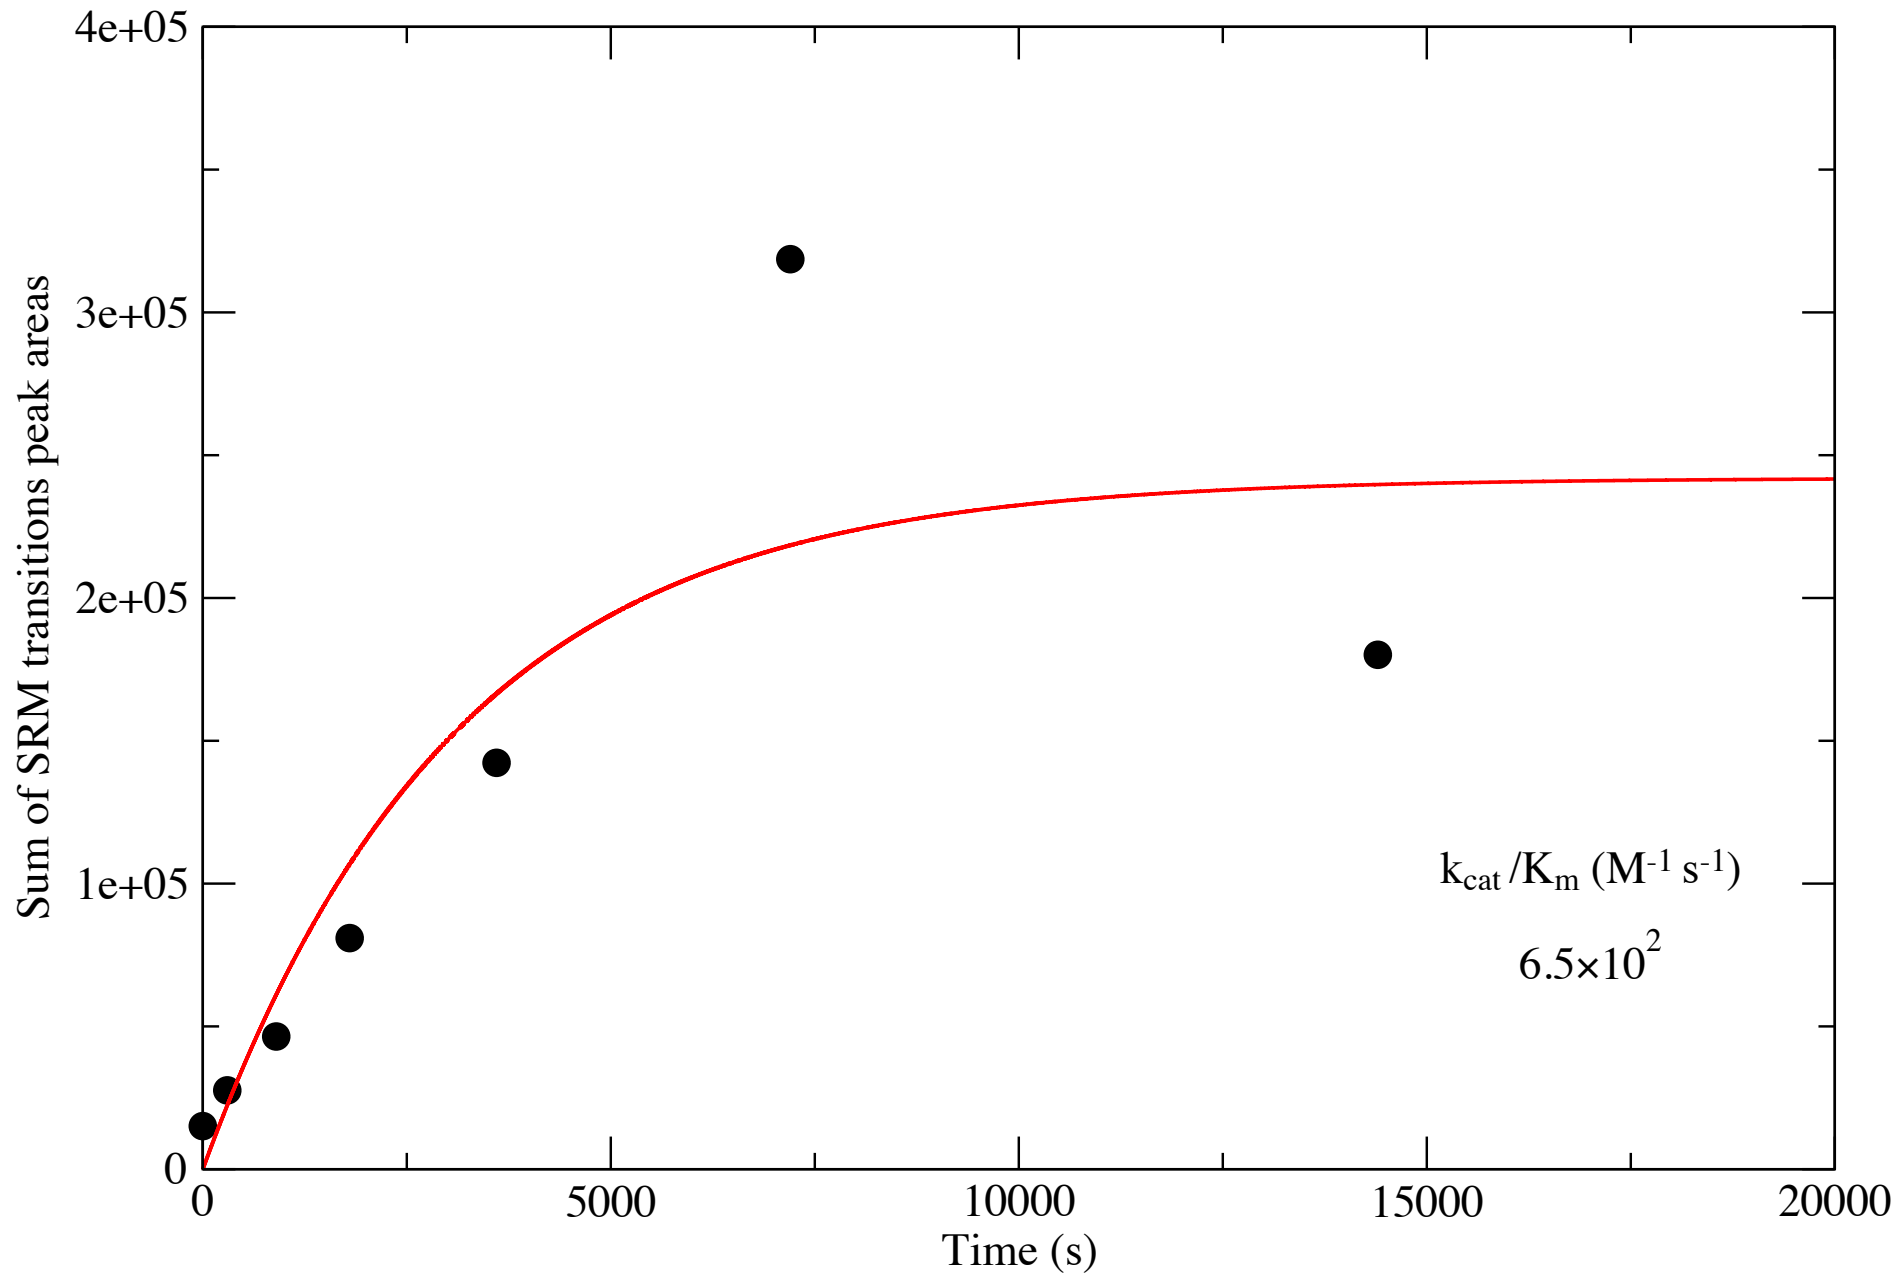

# ENPL\_HUMAN (GTVEEDLGK)

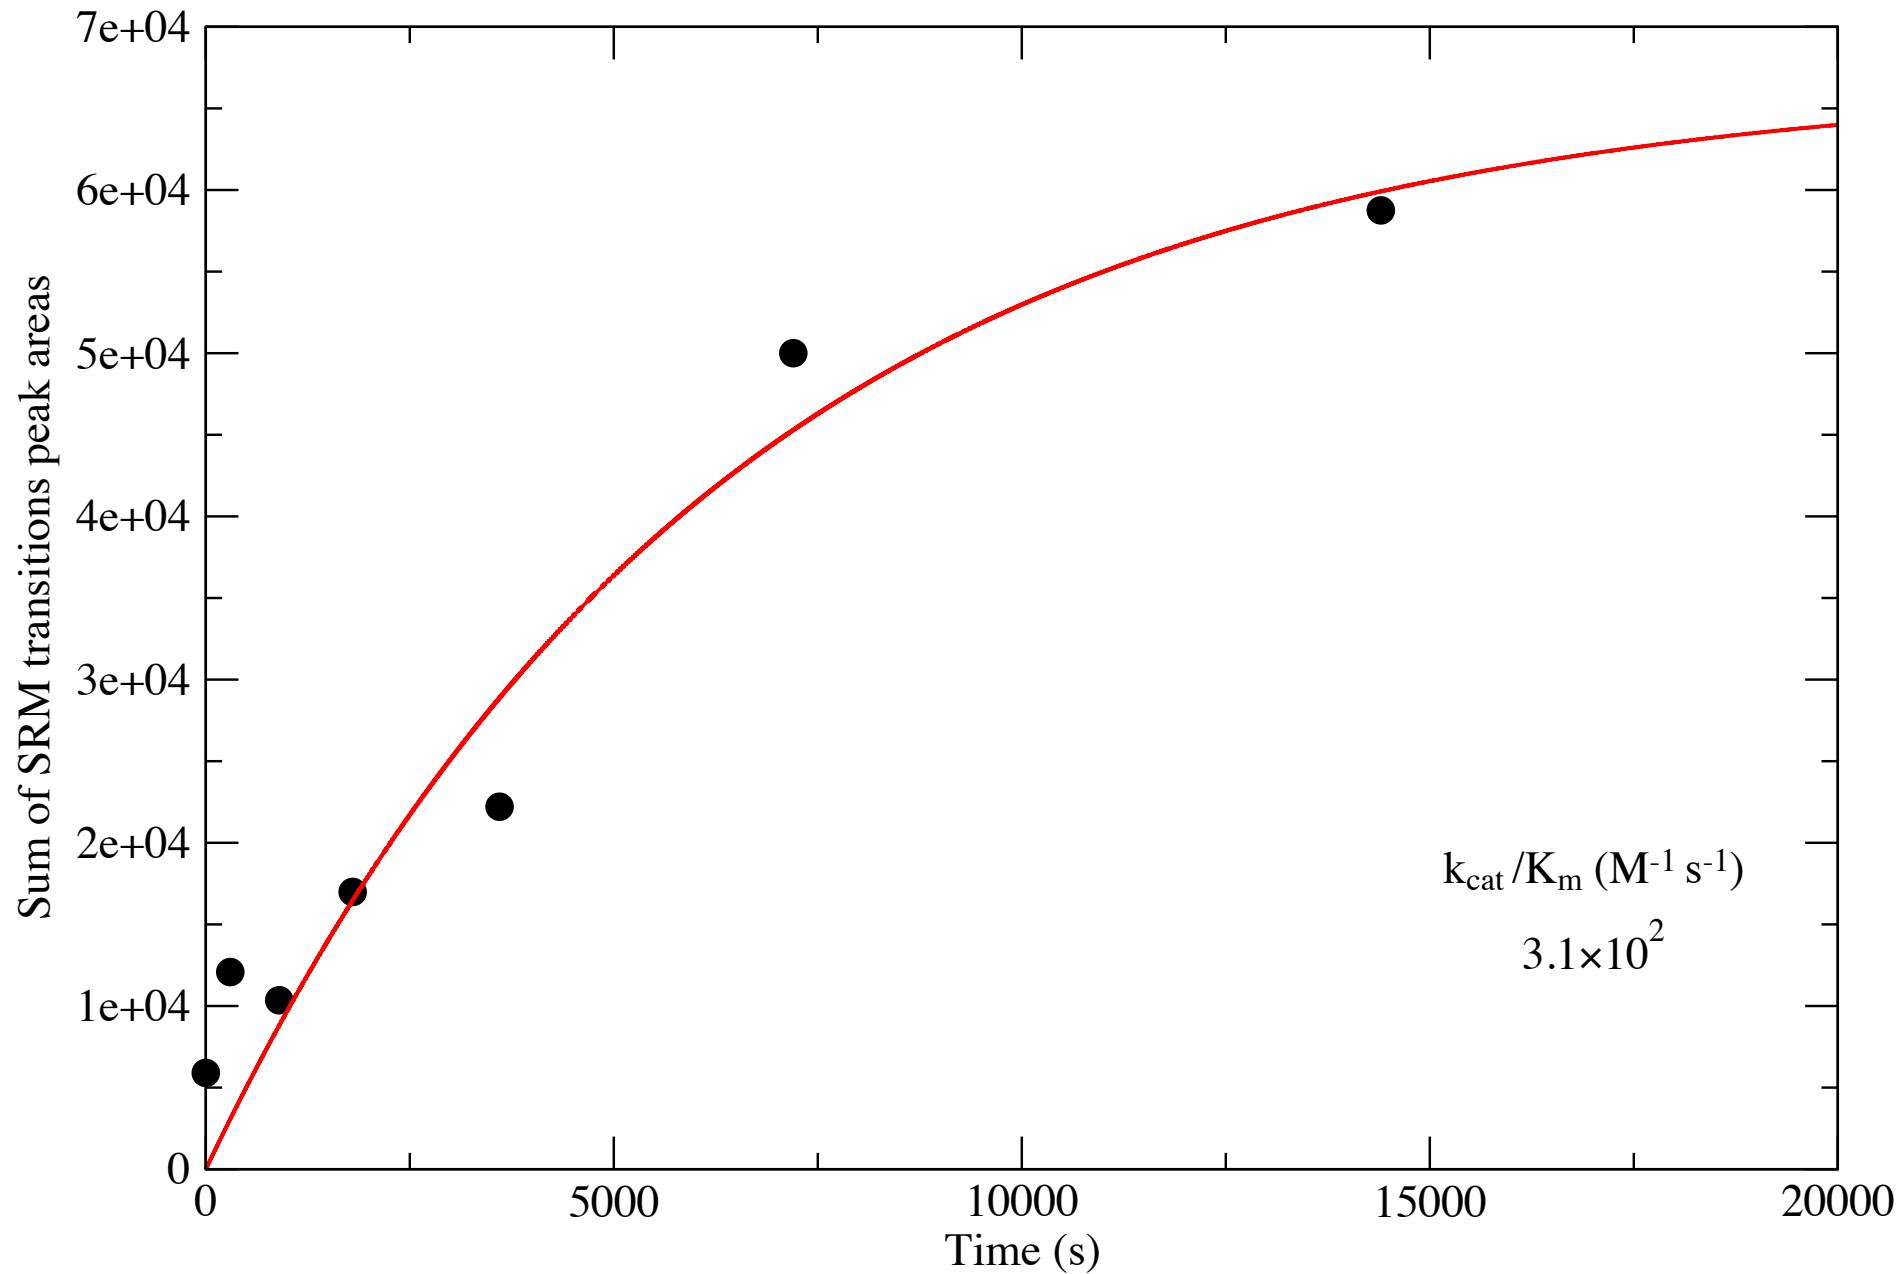

# ERO1A\_HUMAN (GIKSASYKYSEEANNLIEECEQAER)

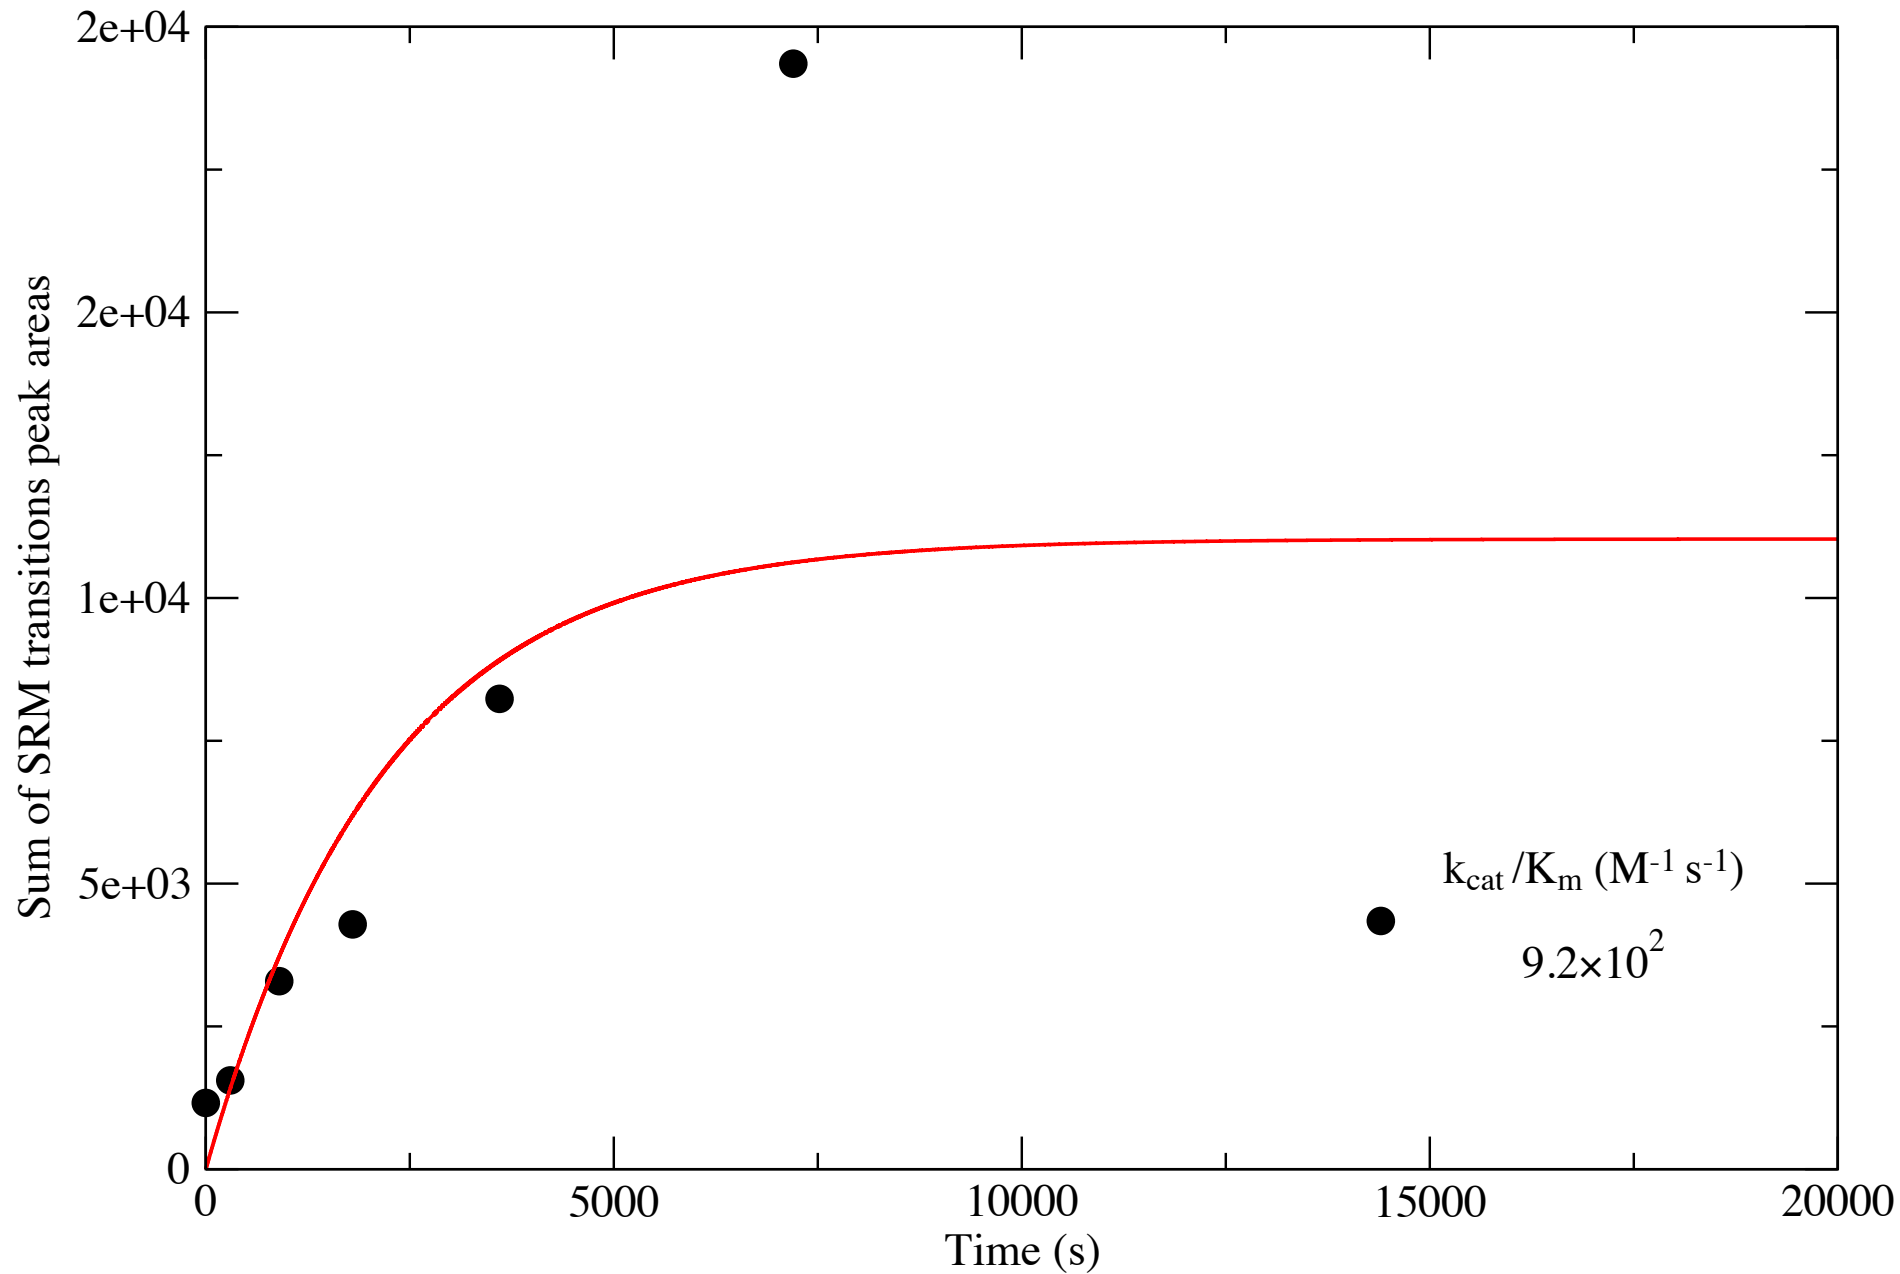

# F117B\_HUMAN (GHRAPPPLVQR)

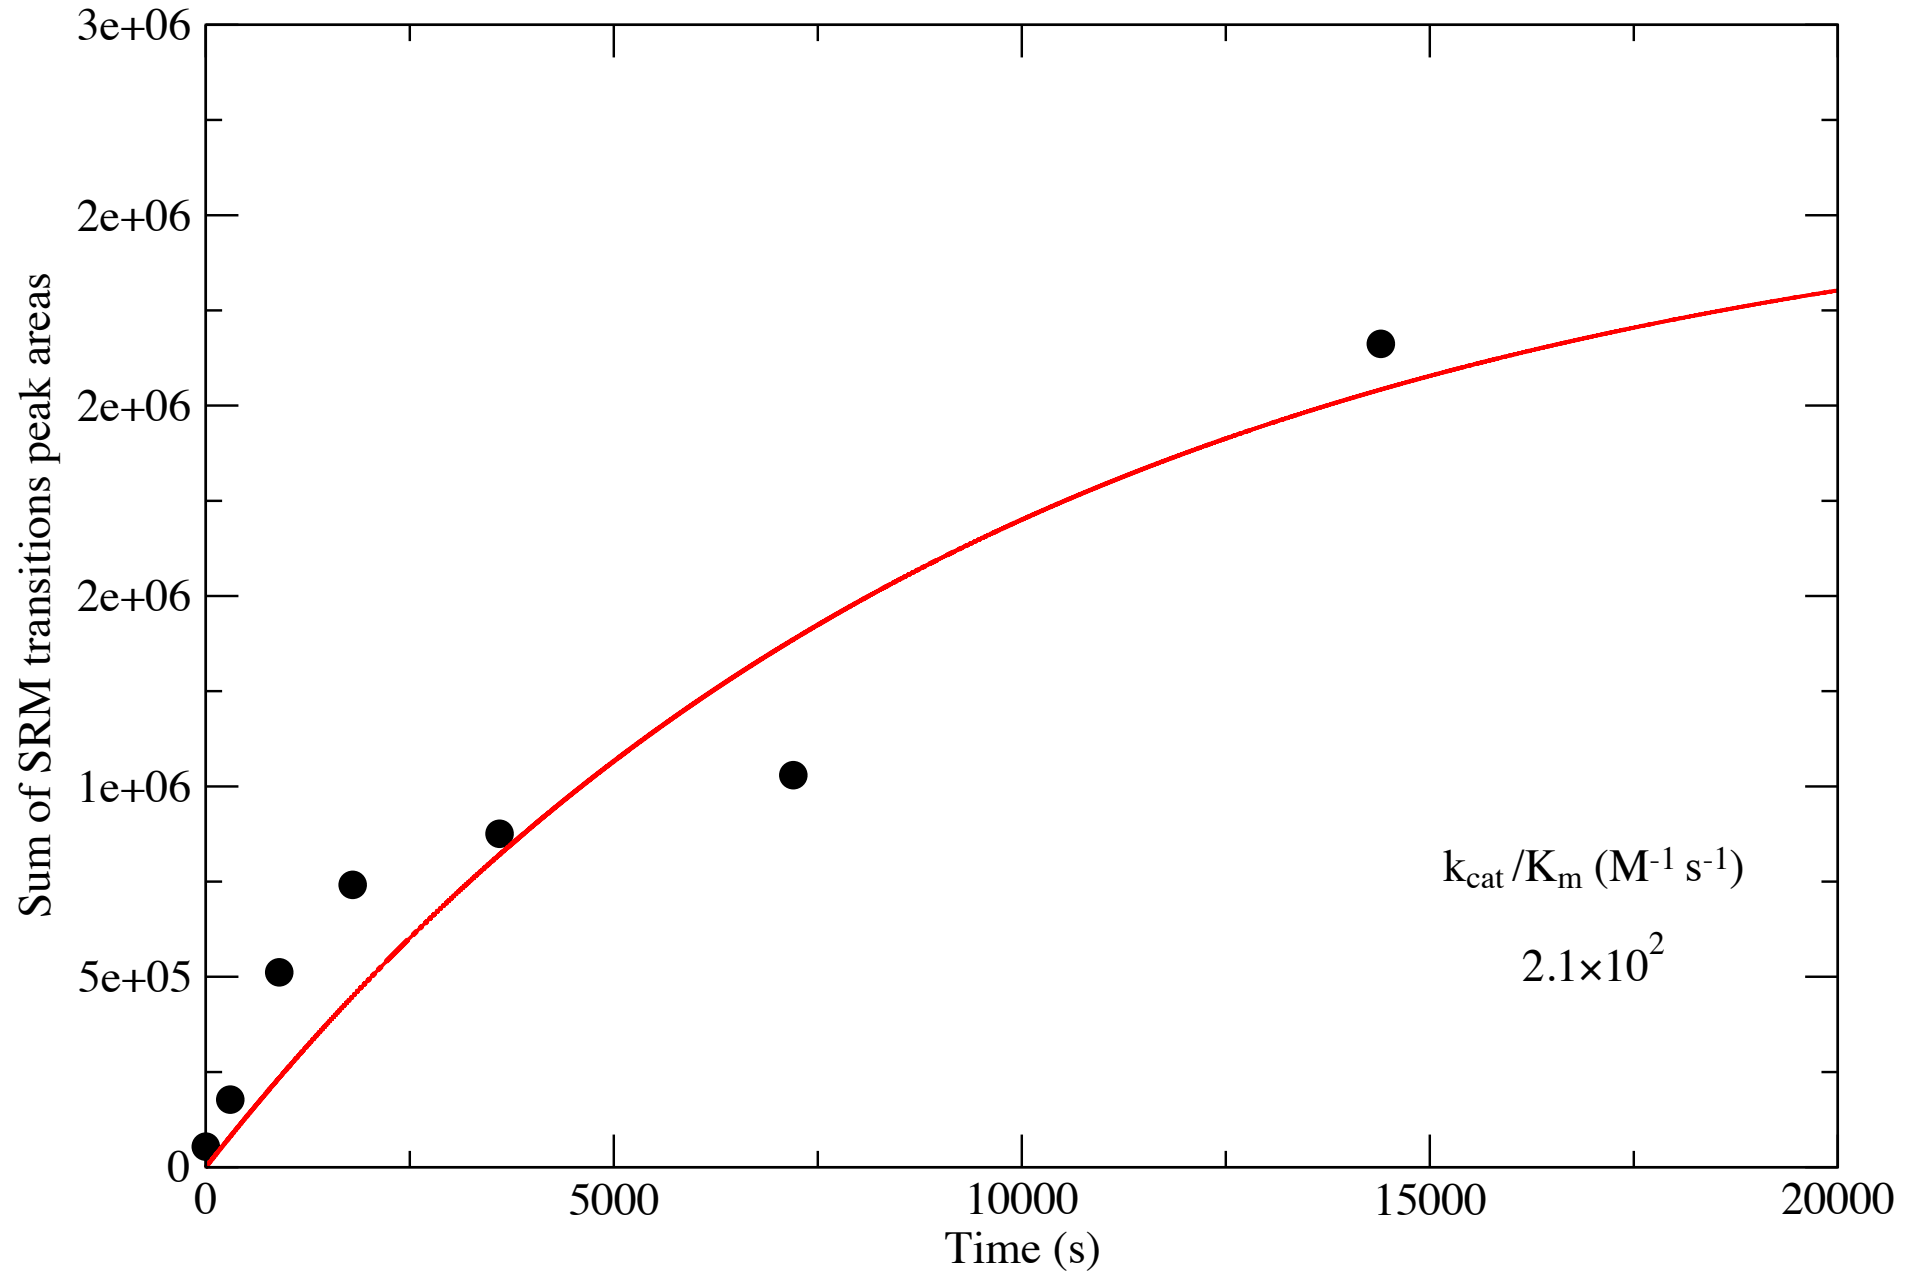



# FYB\_HUMAN (GFPAPPK)

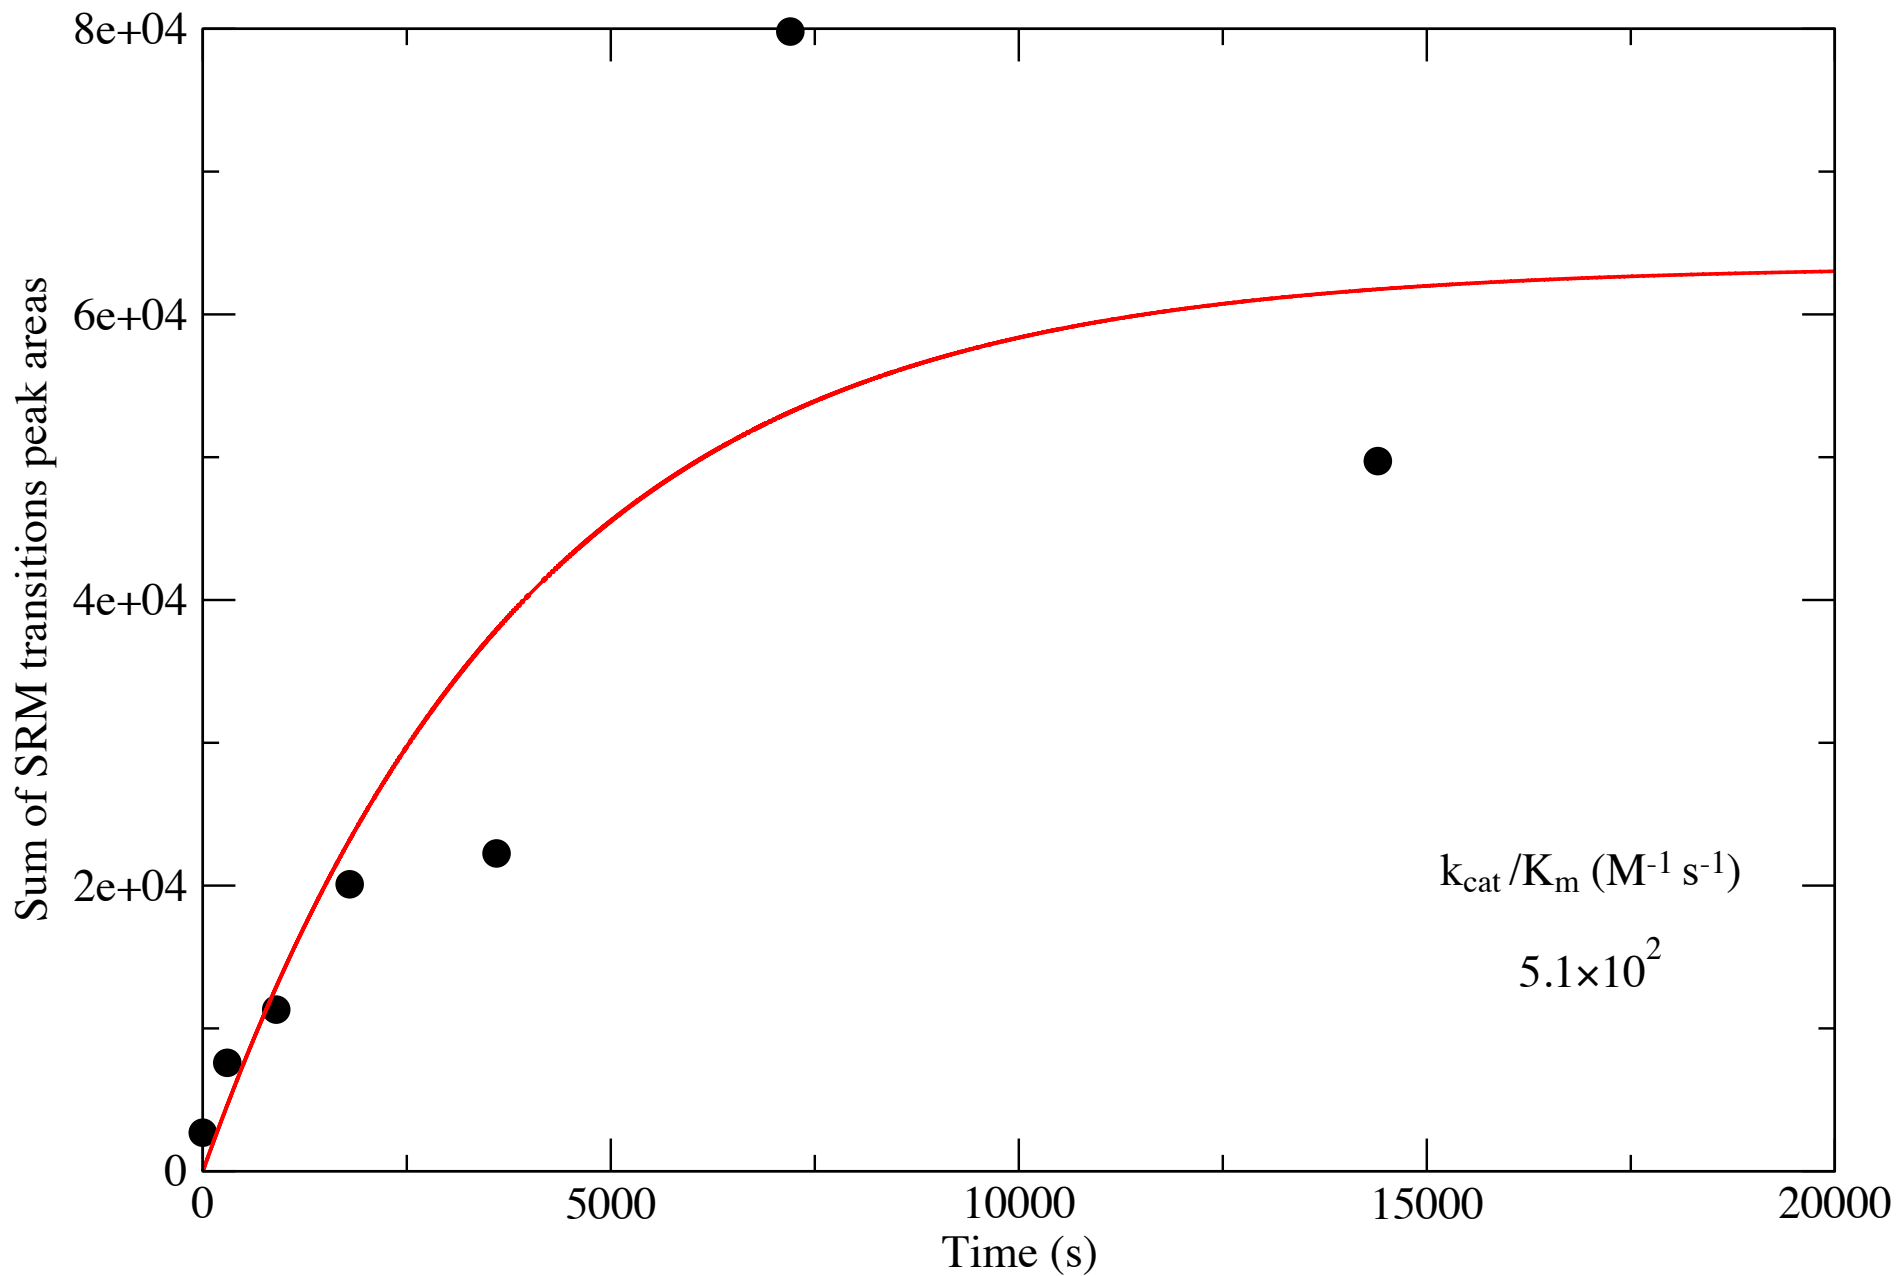

# GDIR2\_HUMAN (SKLNYKPPPQK)

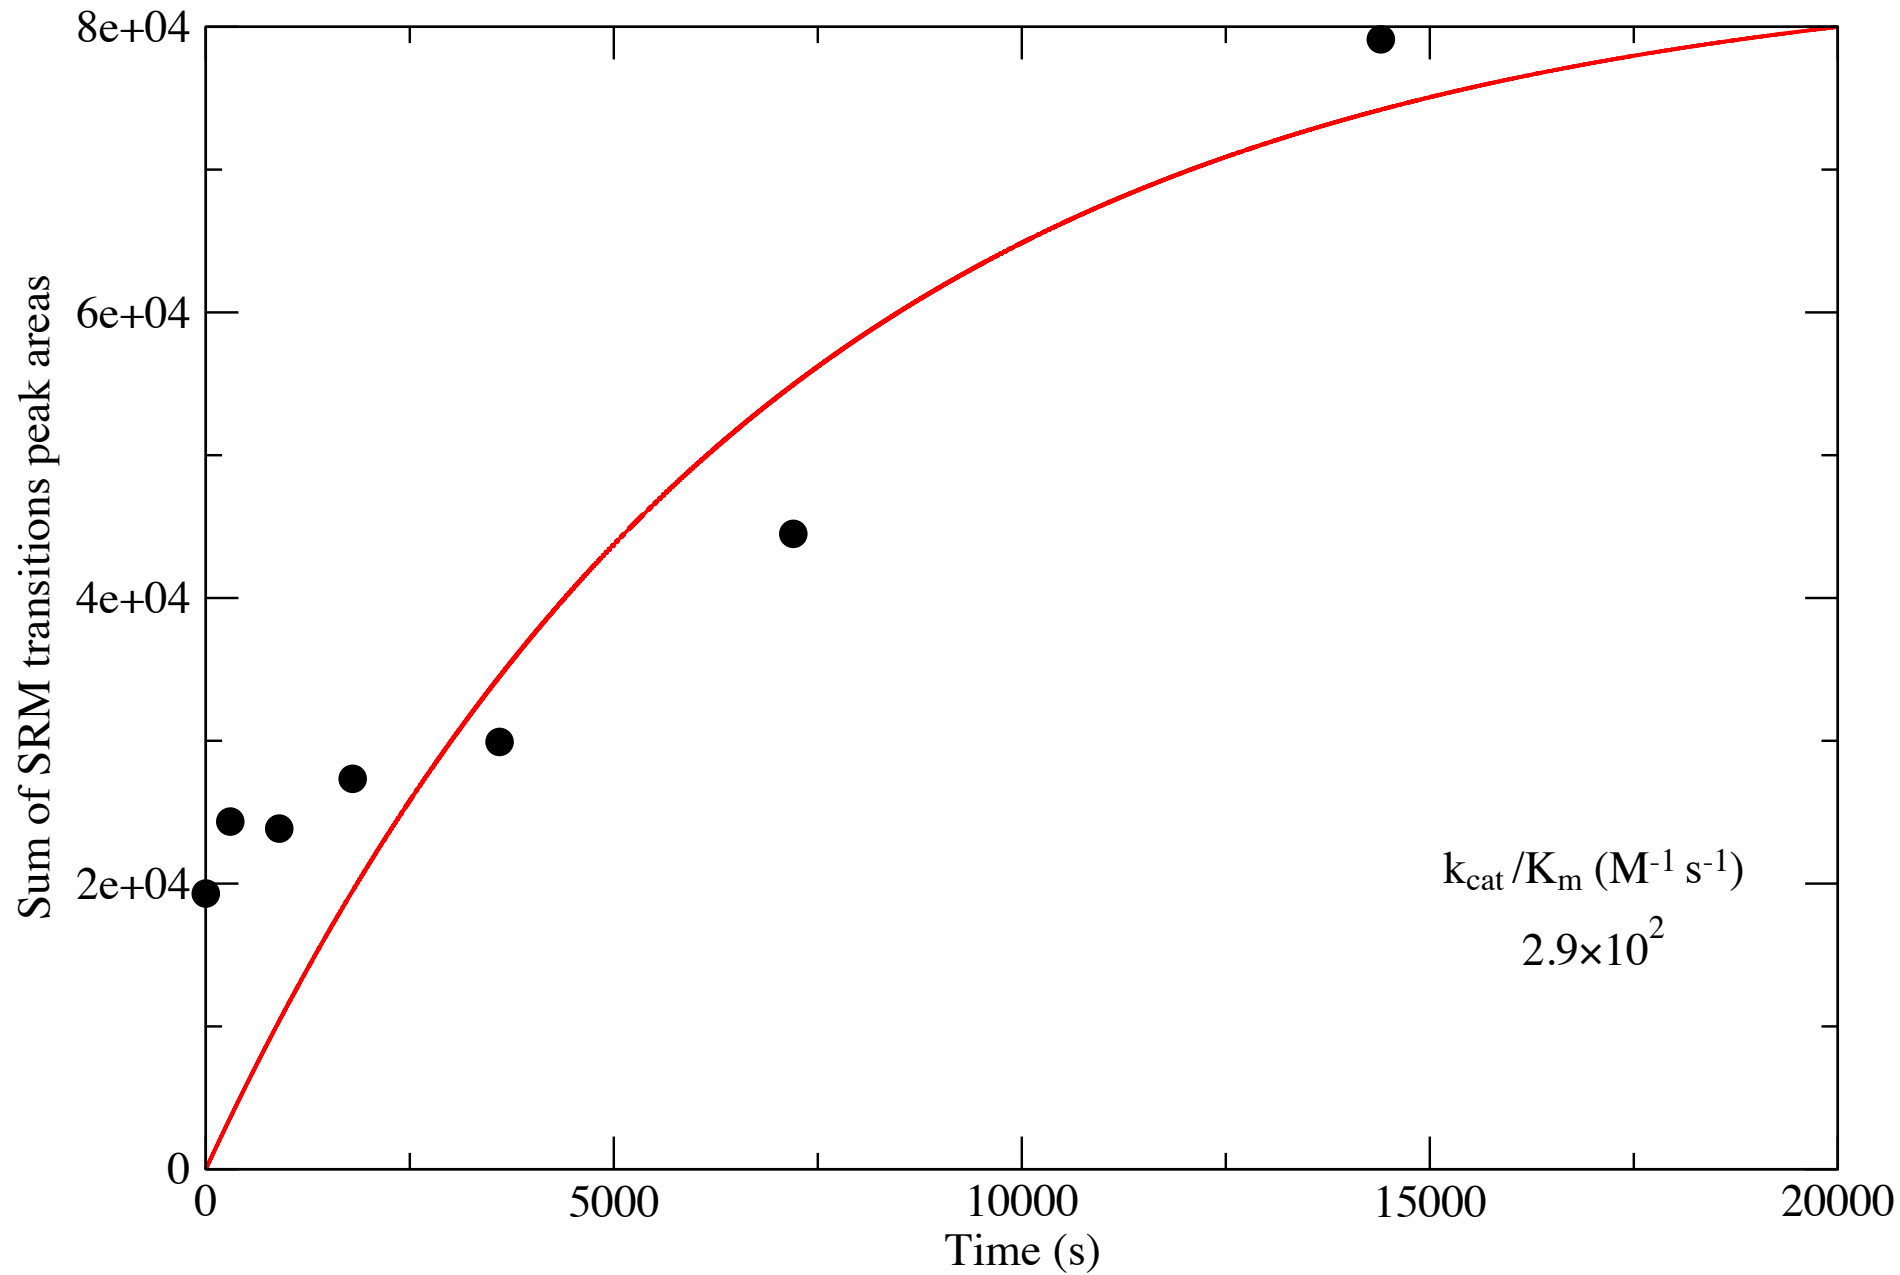

# GMIP\_HUMAN (GGGEVSSQGPEDSLLGTQSR)

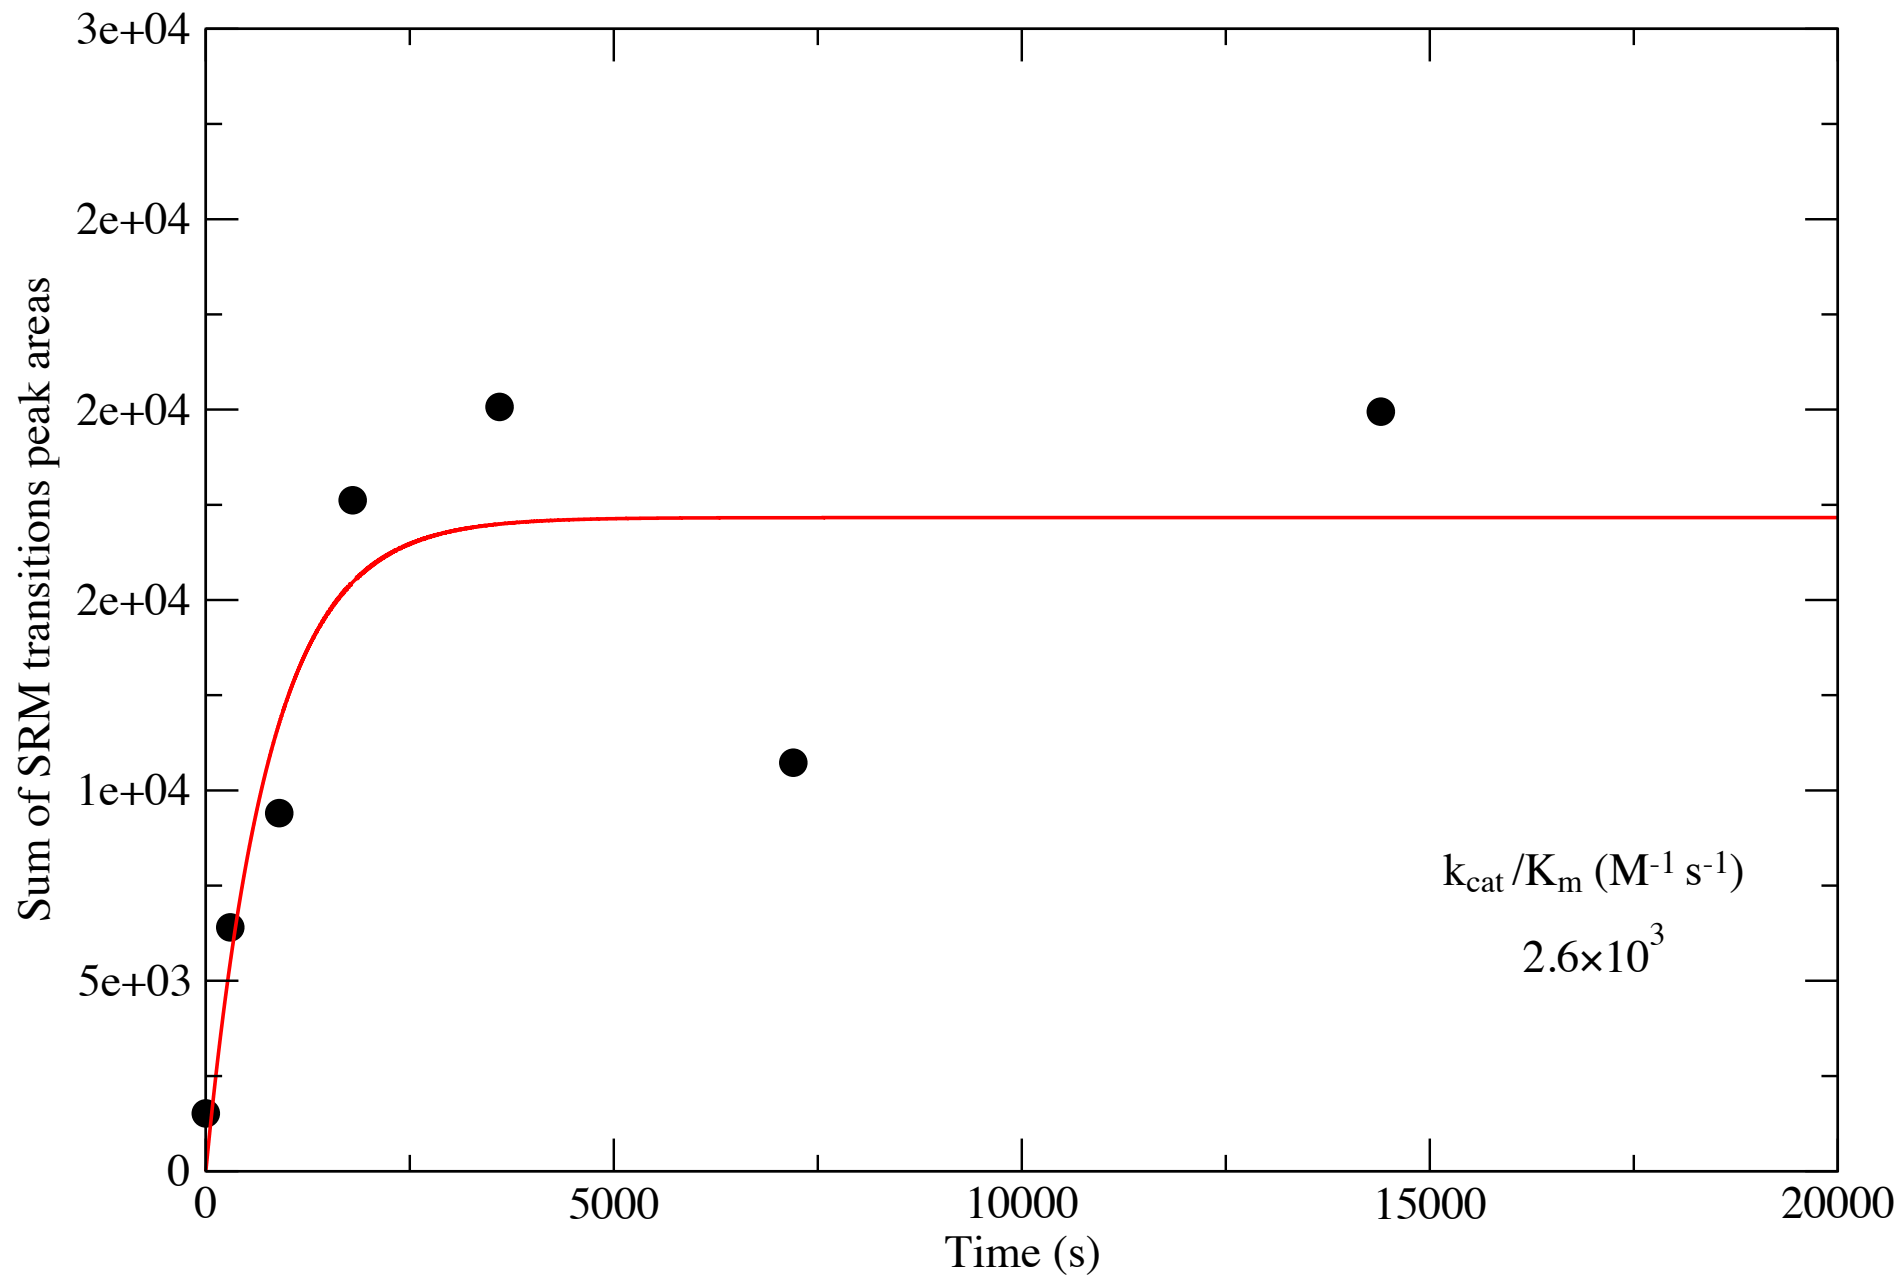

# GNL1\_HUMAN (GESVTHHIR)

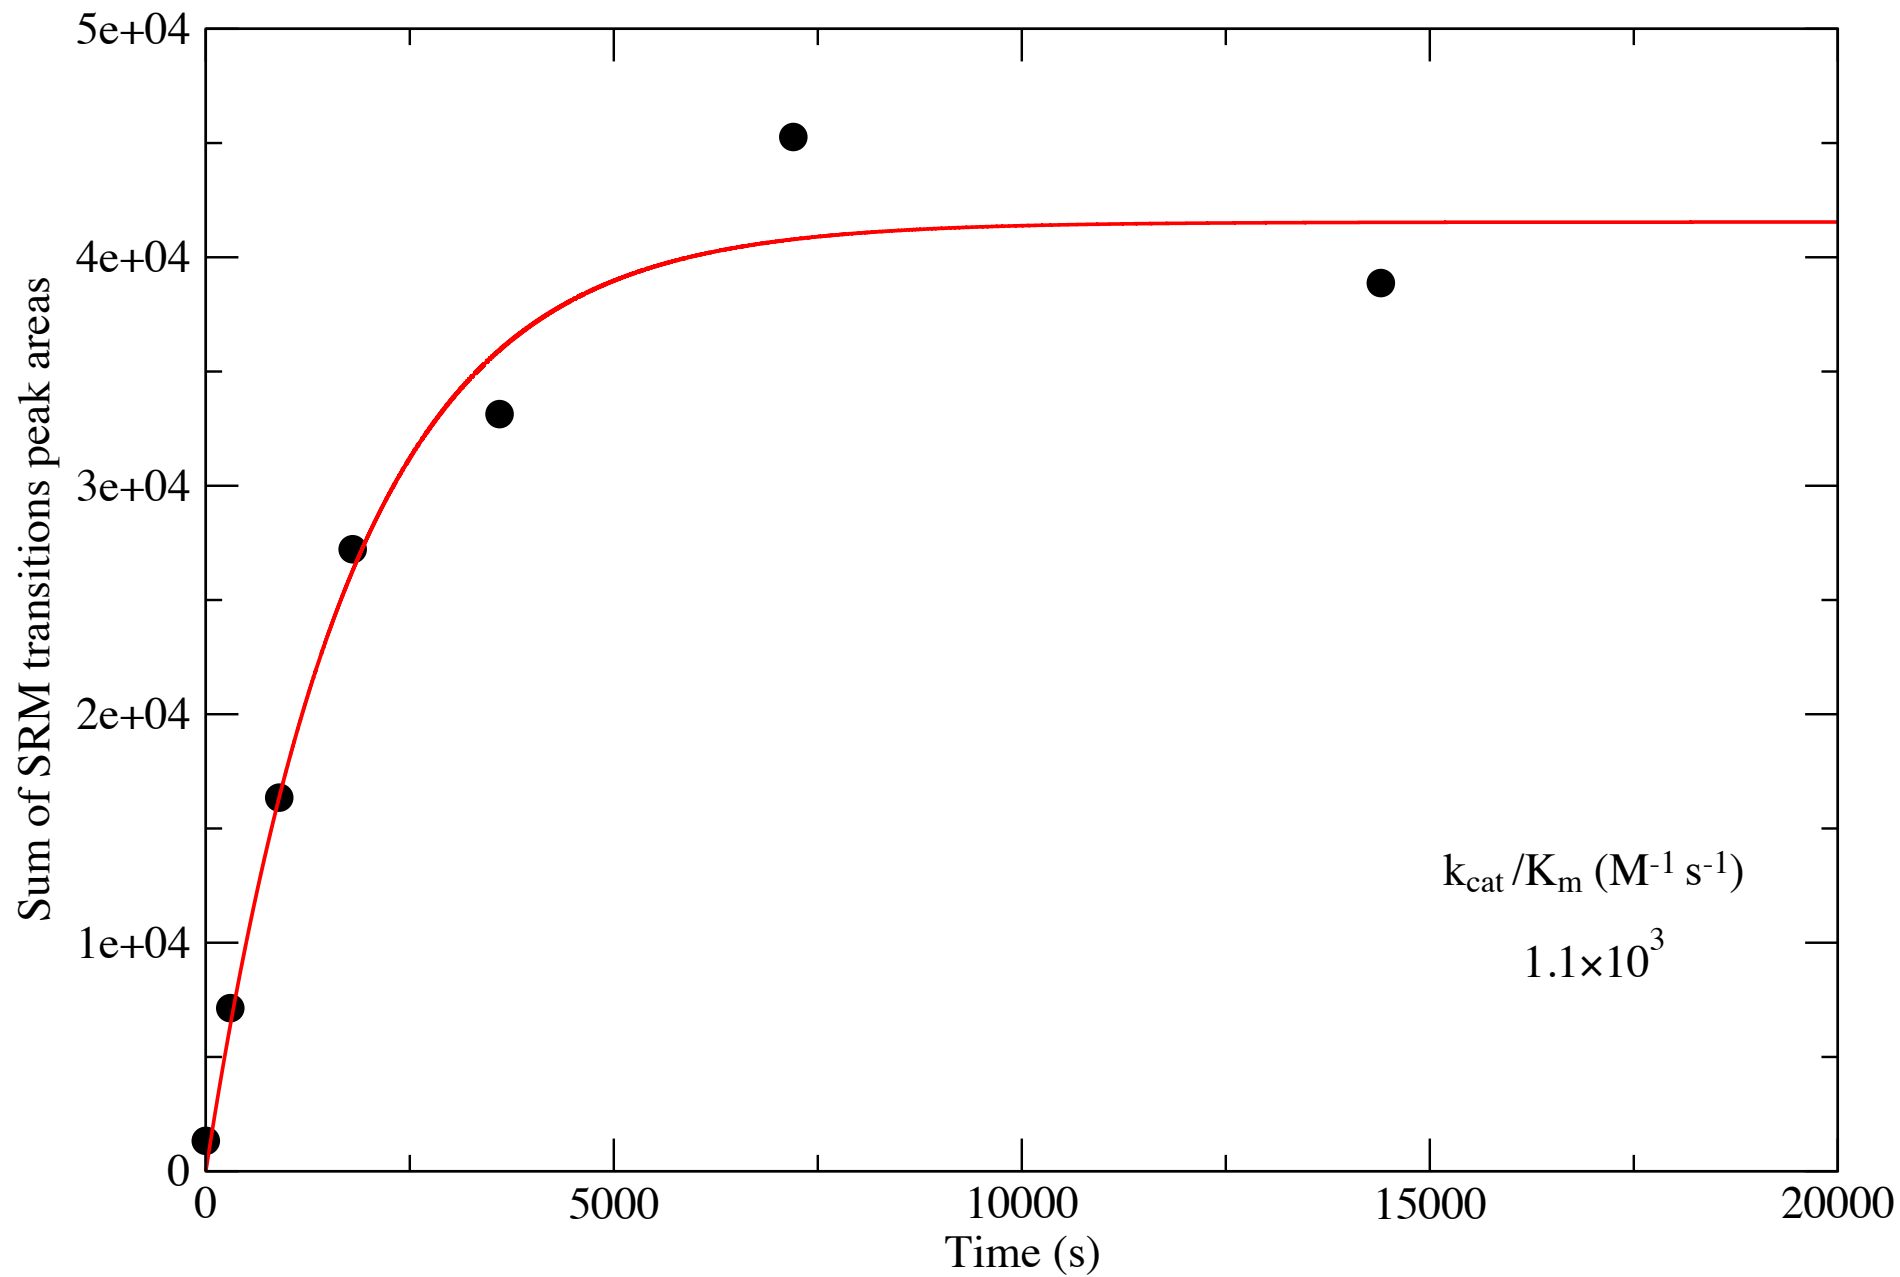

# GRAP2\_HUMAN (GHC GTGLGSEMNAALMHR)

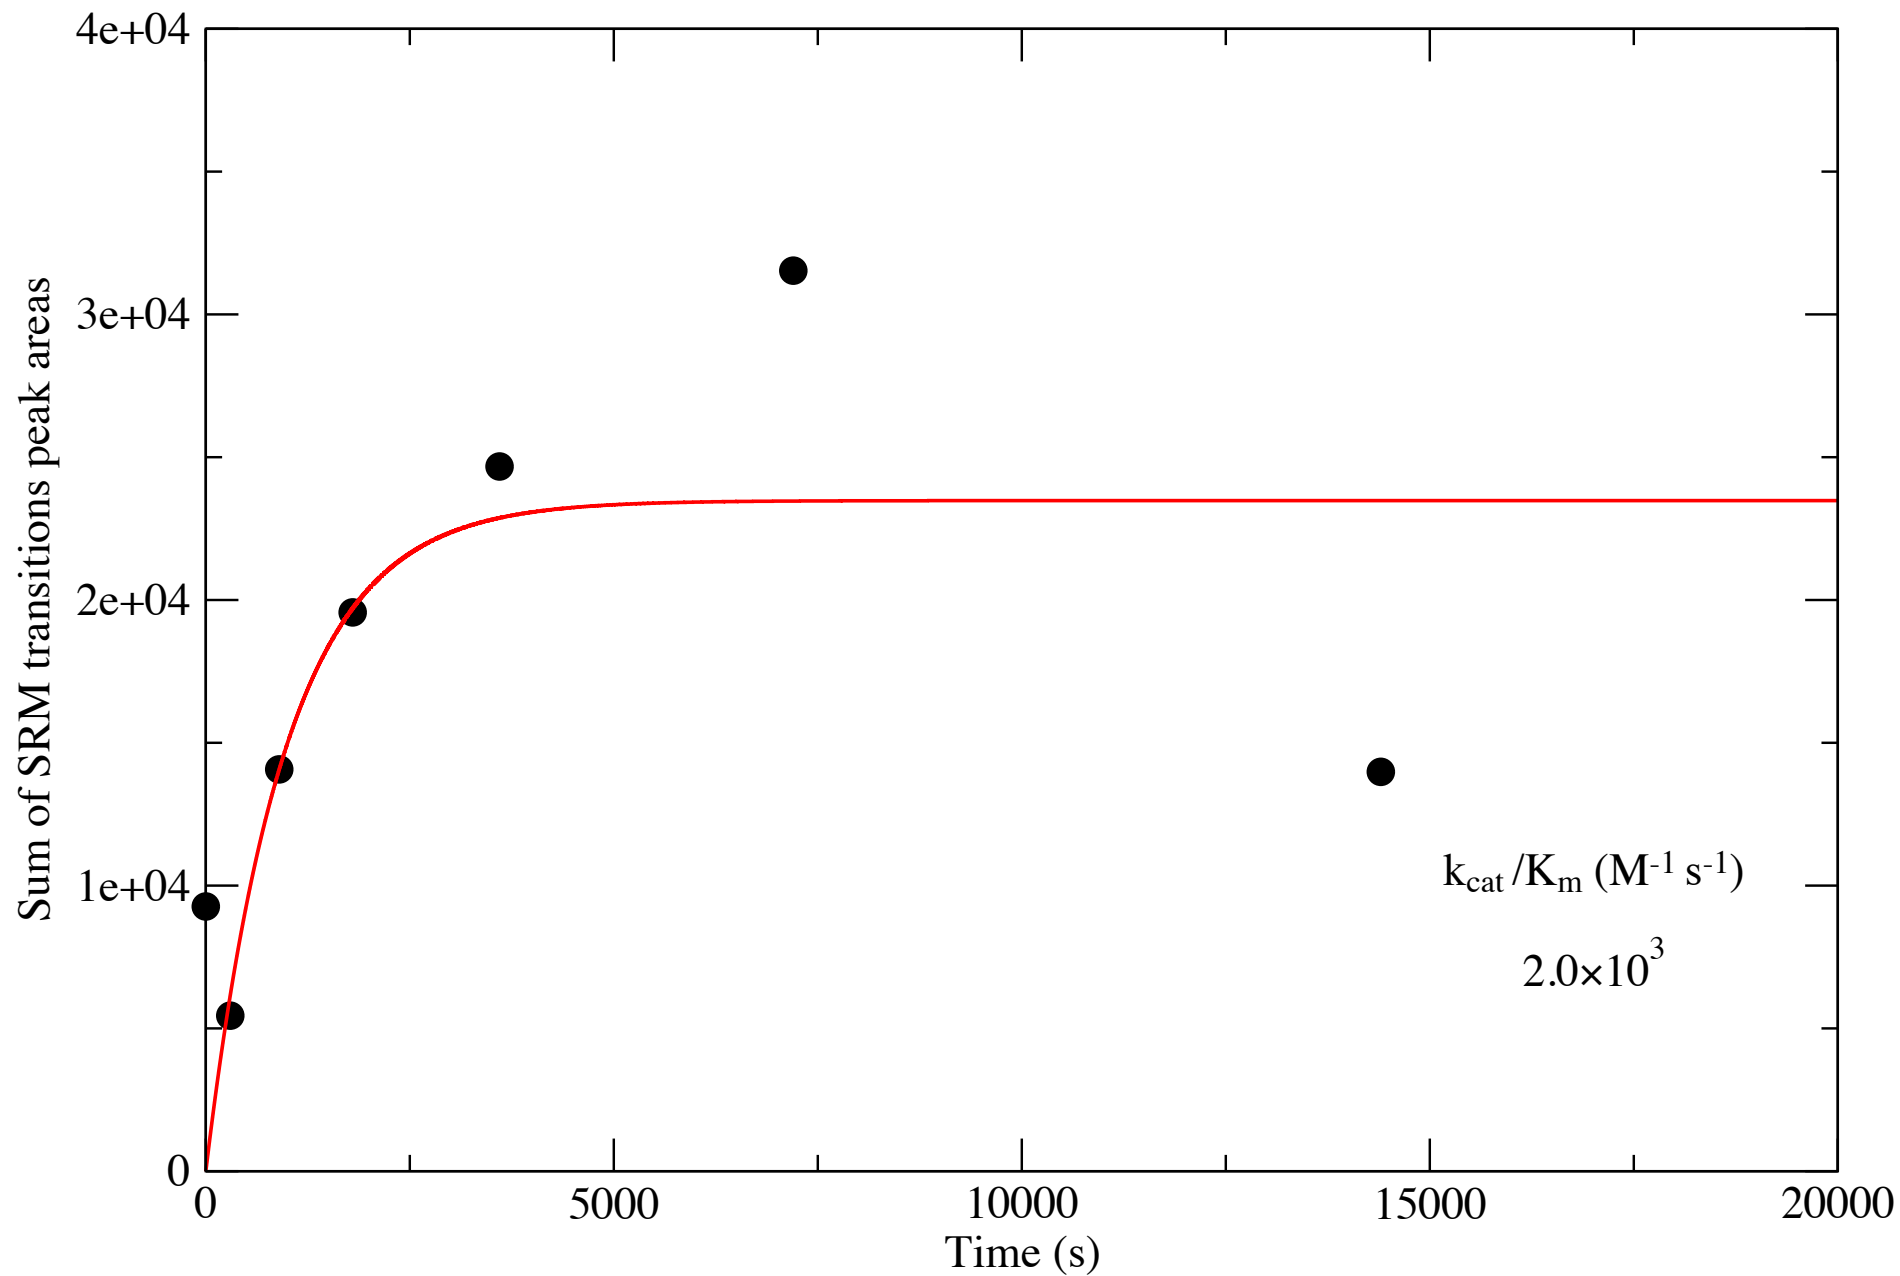

# HDAC6\_HUMAN (SMLMQGSR)

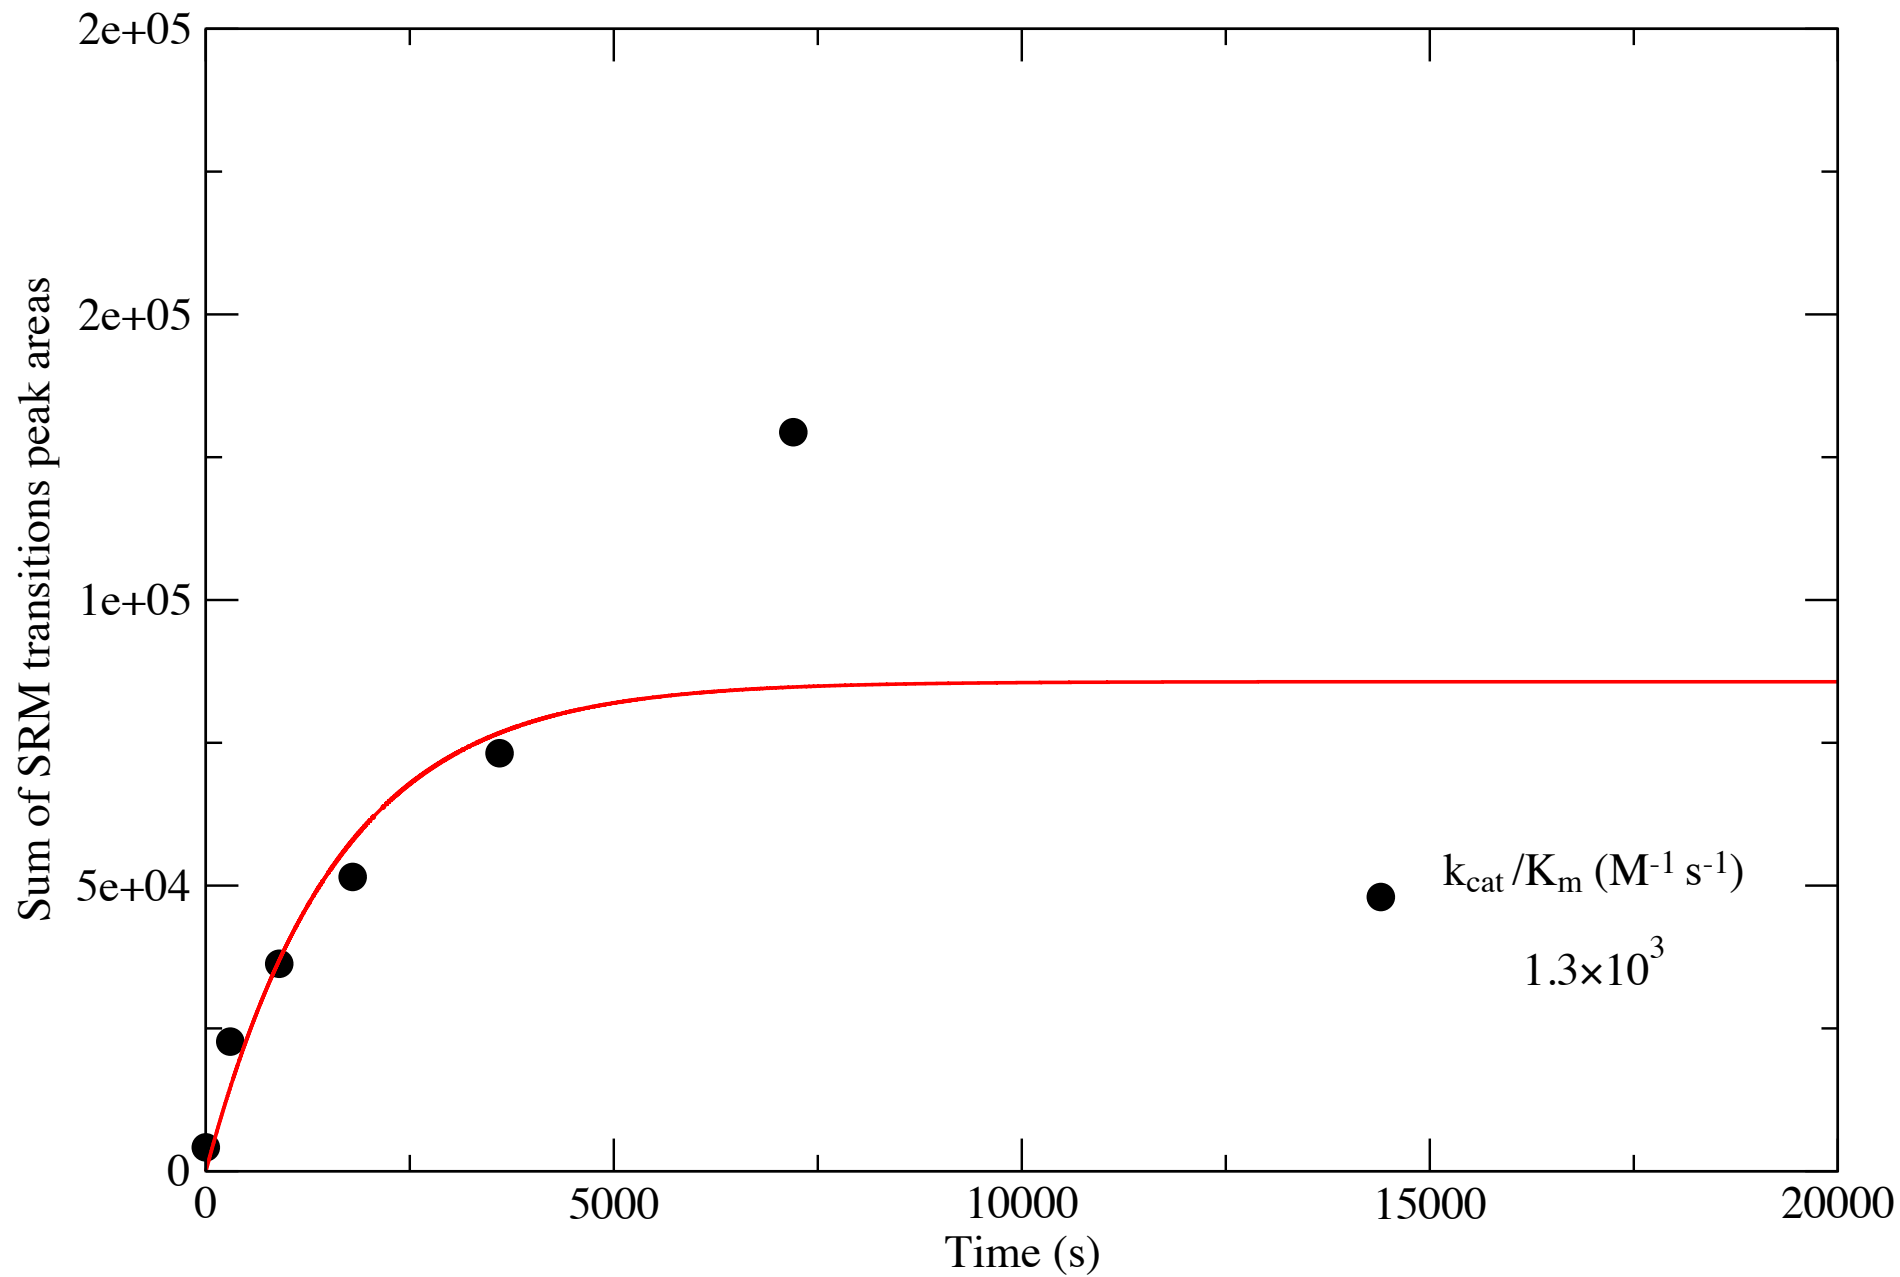

# HJURP\_HUMAN (GSVQAAA WGPELPSHR)

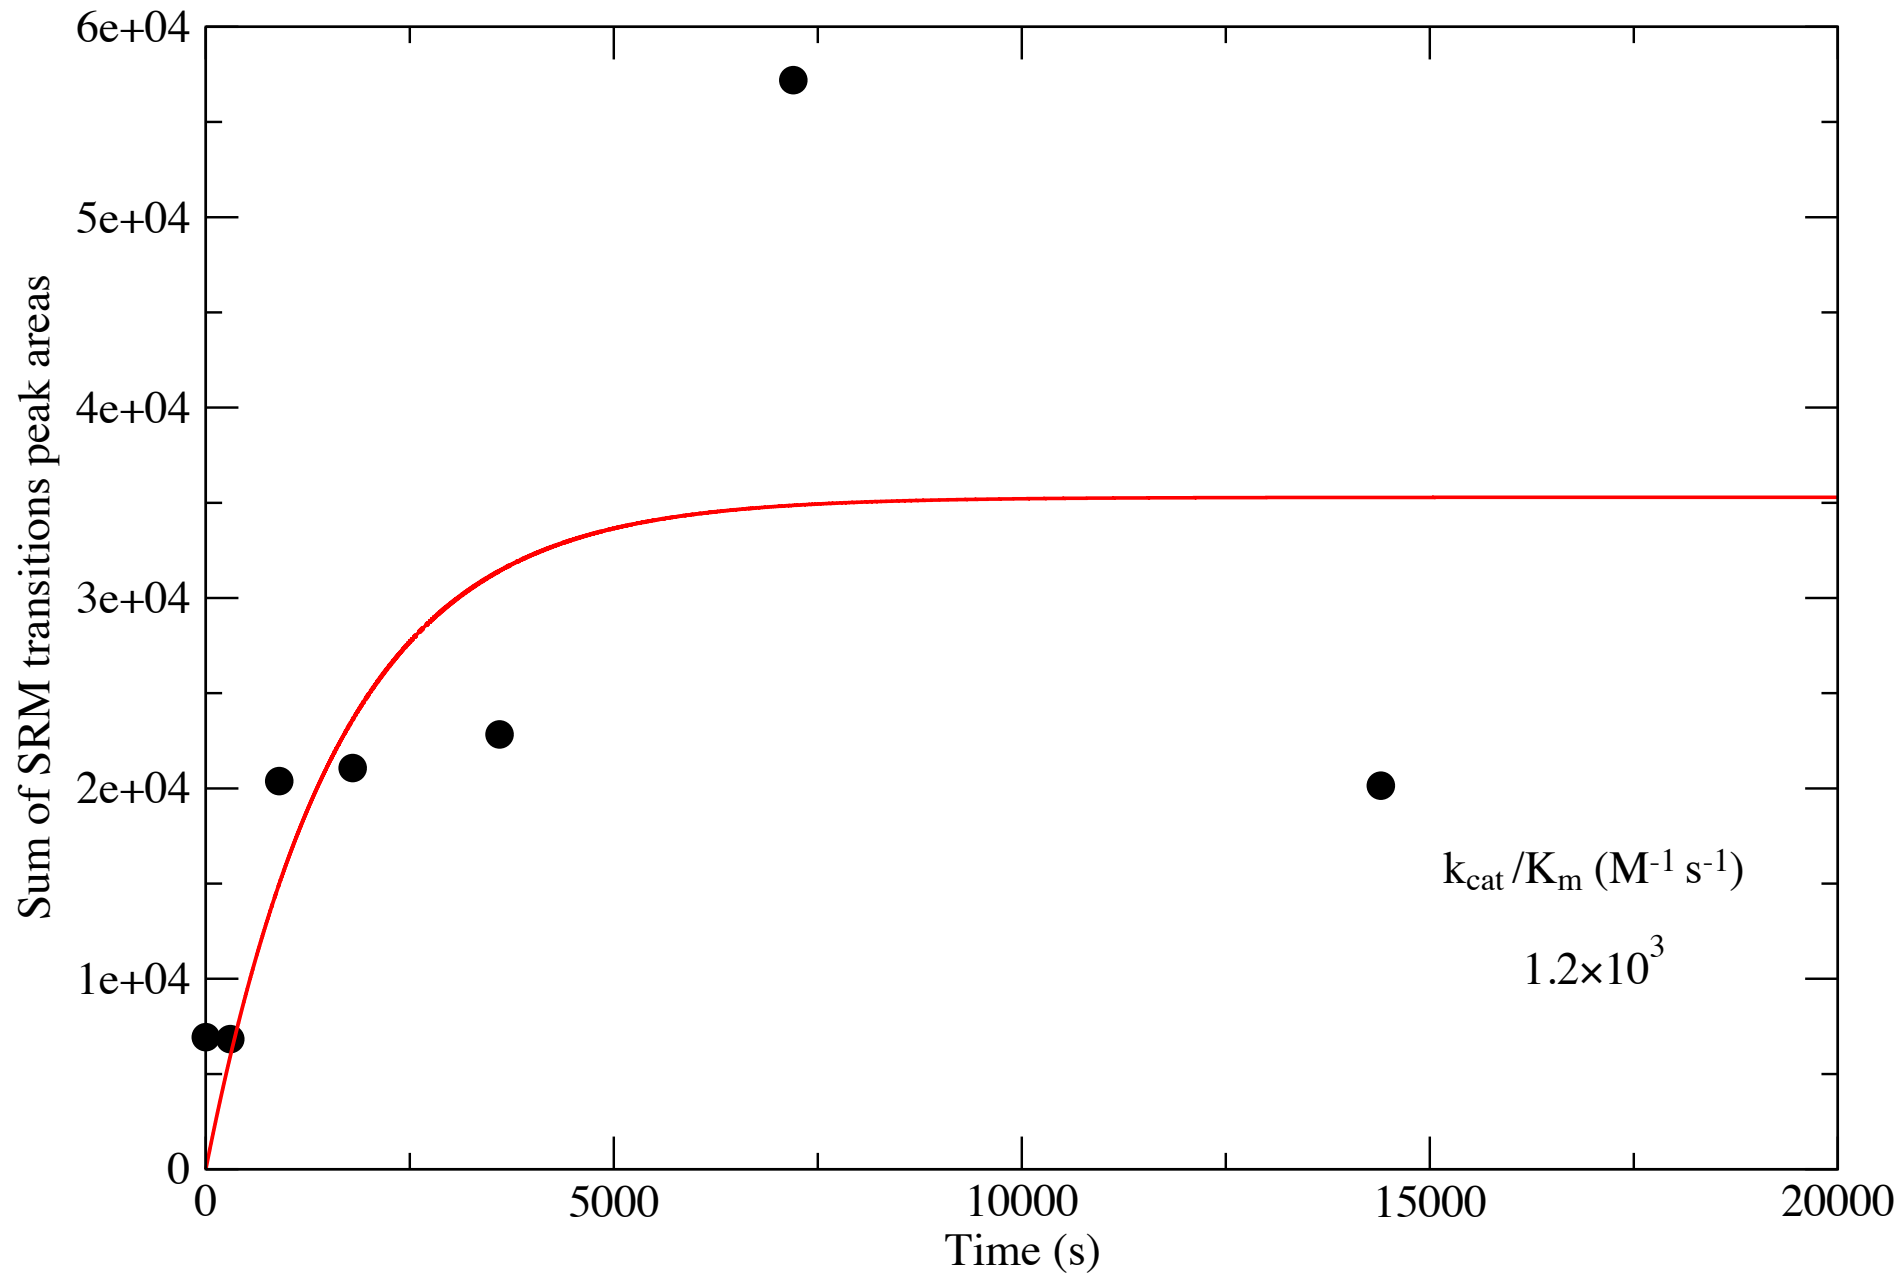

# HUWE1\_HUMAN (GGSGNSTIIVSR)

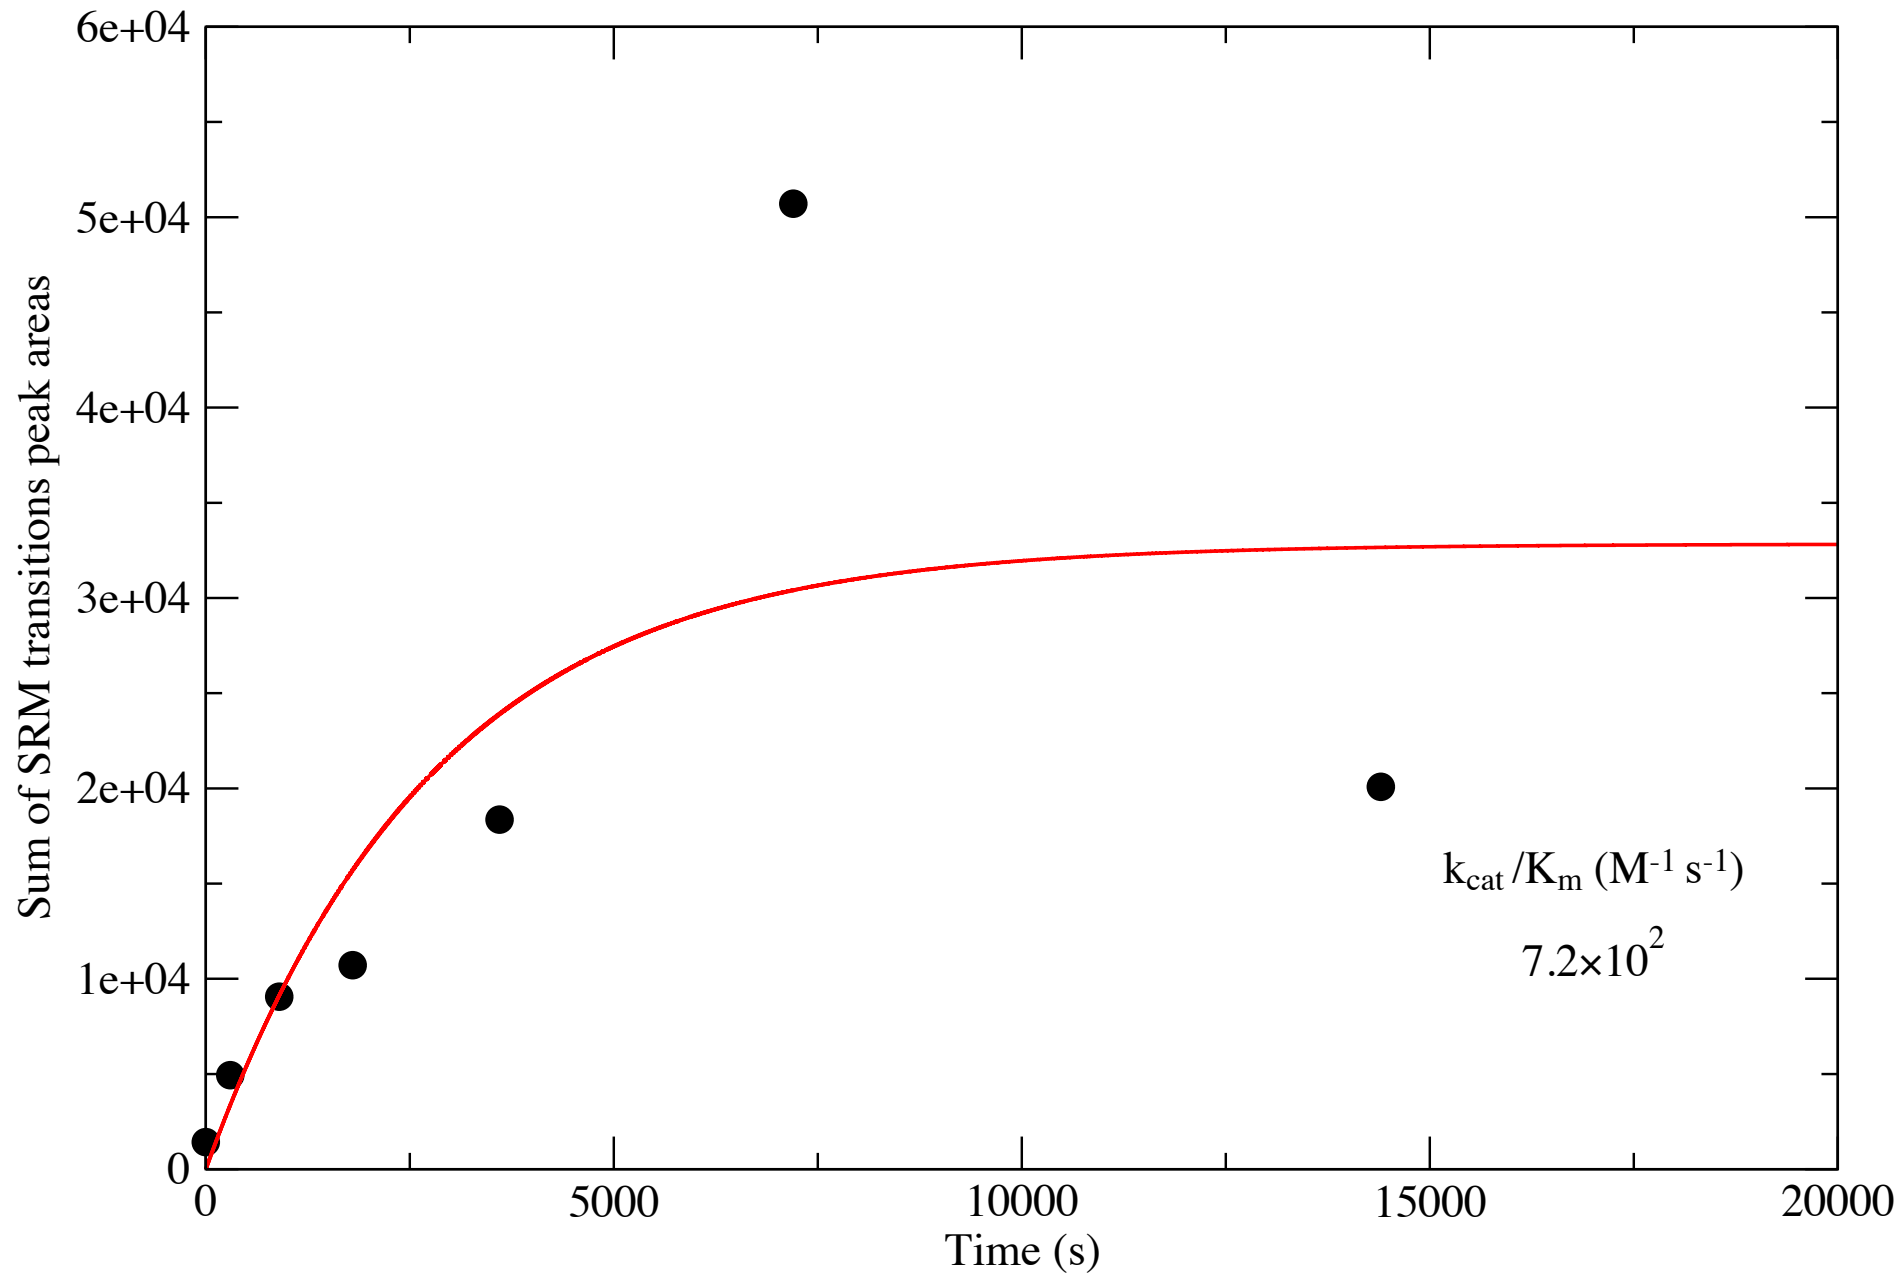



# IF4H\_HUMAN (GALLGDR)

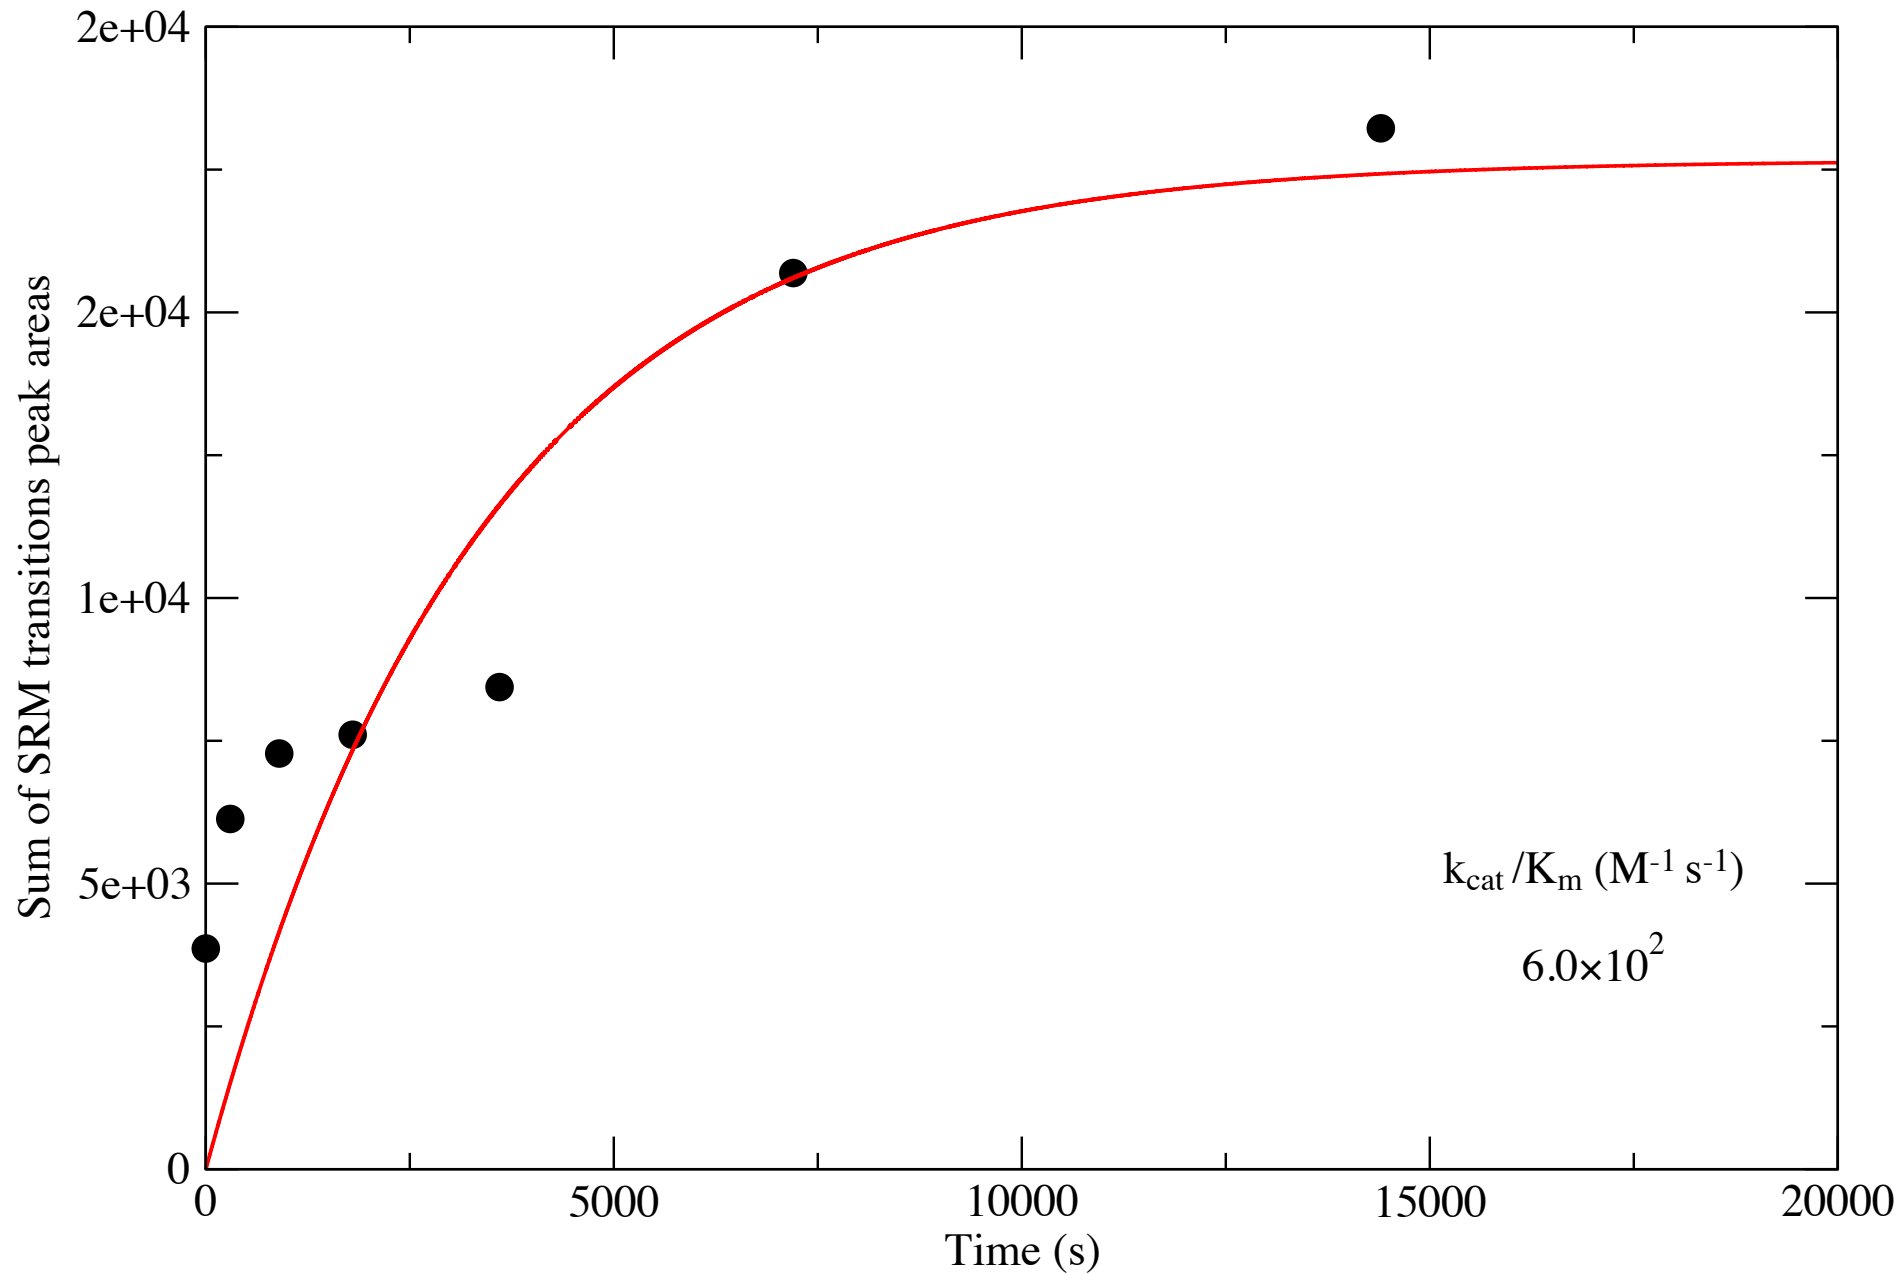

# KMT2D\_HUMAN (ALYVACQGQPK)

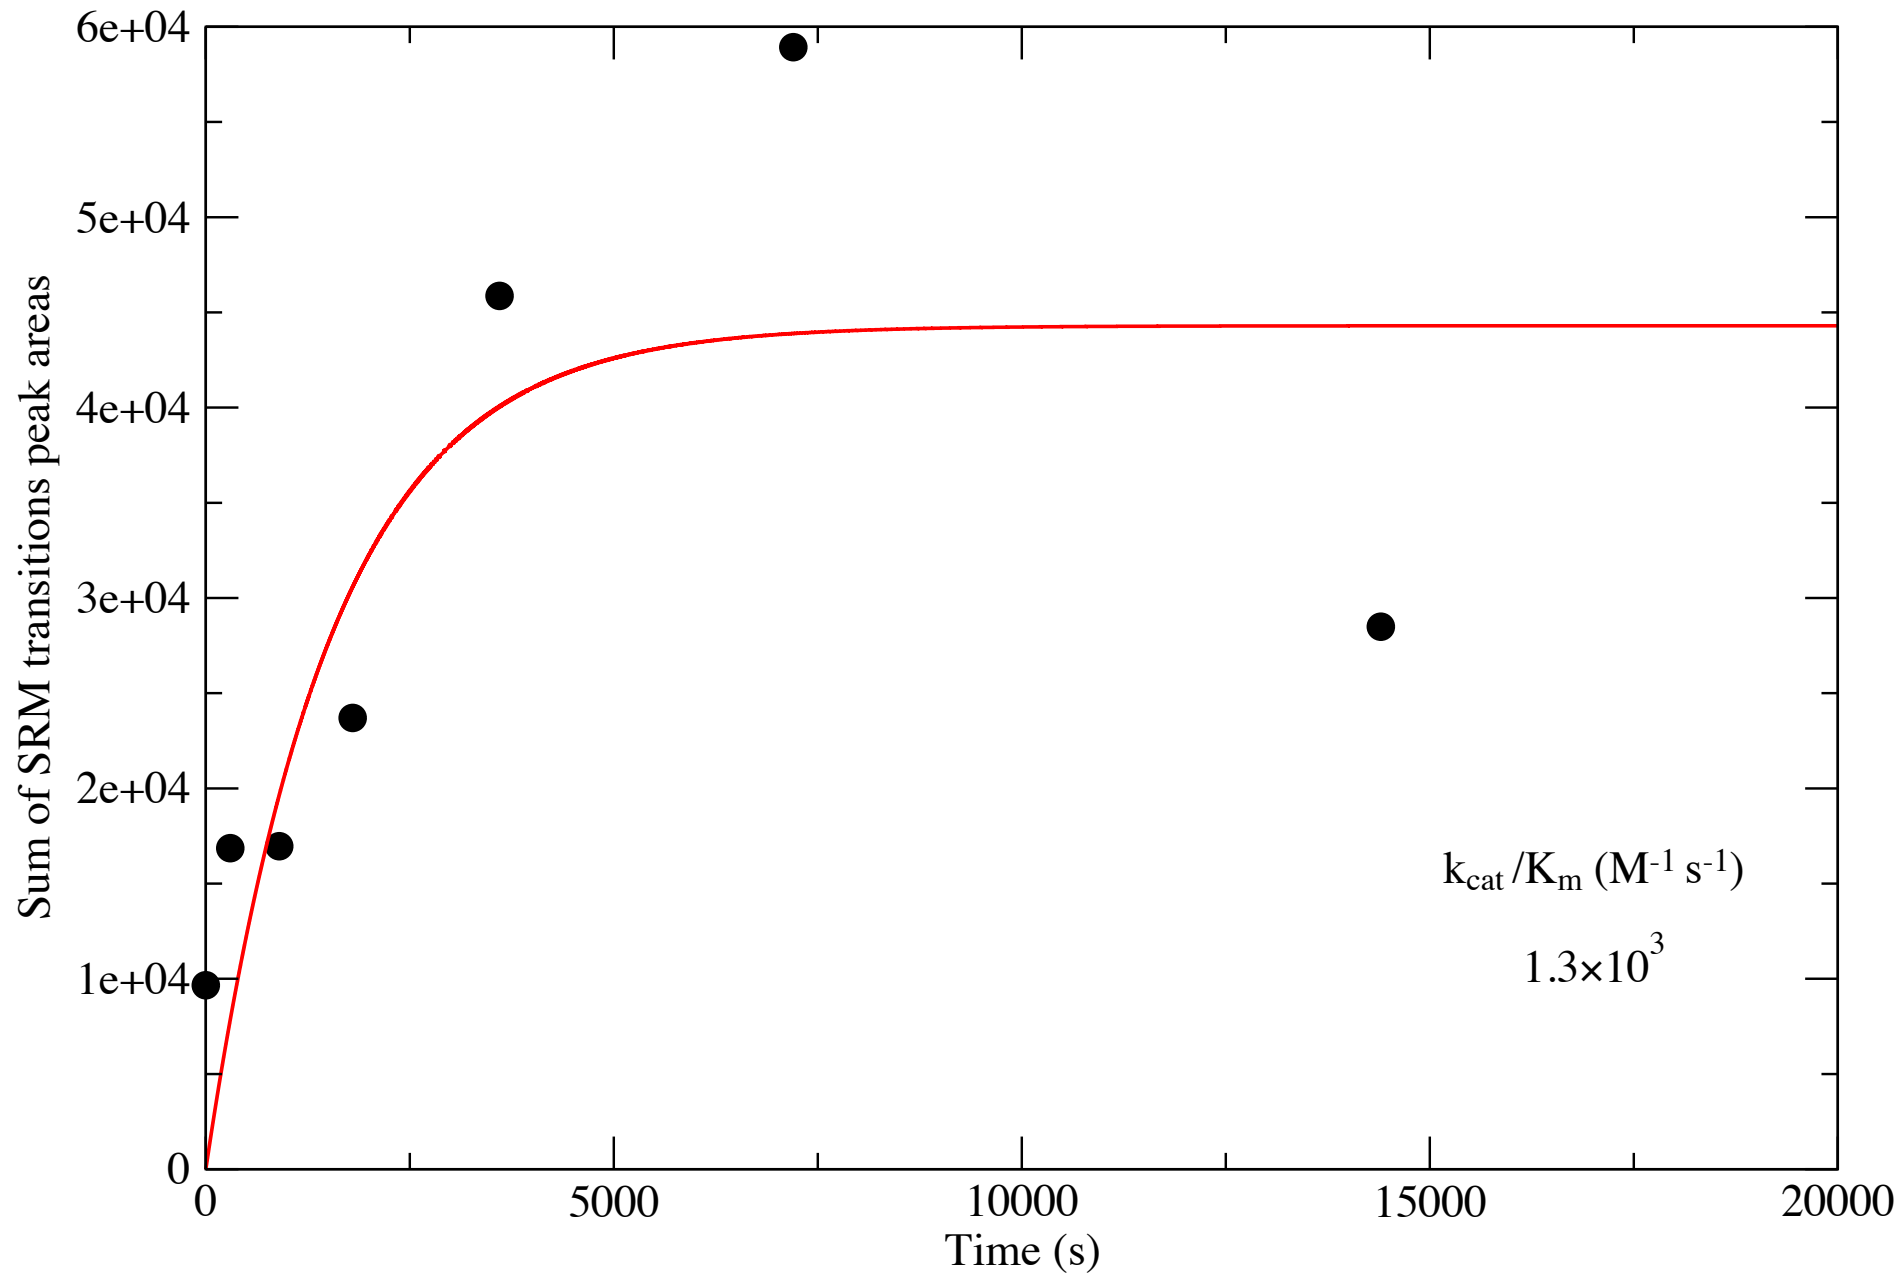

# MCM4\_HUMAN (GAAAEDIVASEQSLGQK)

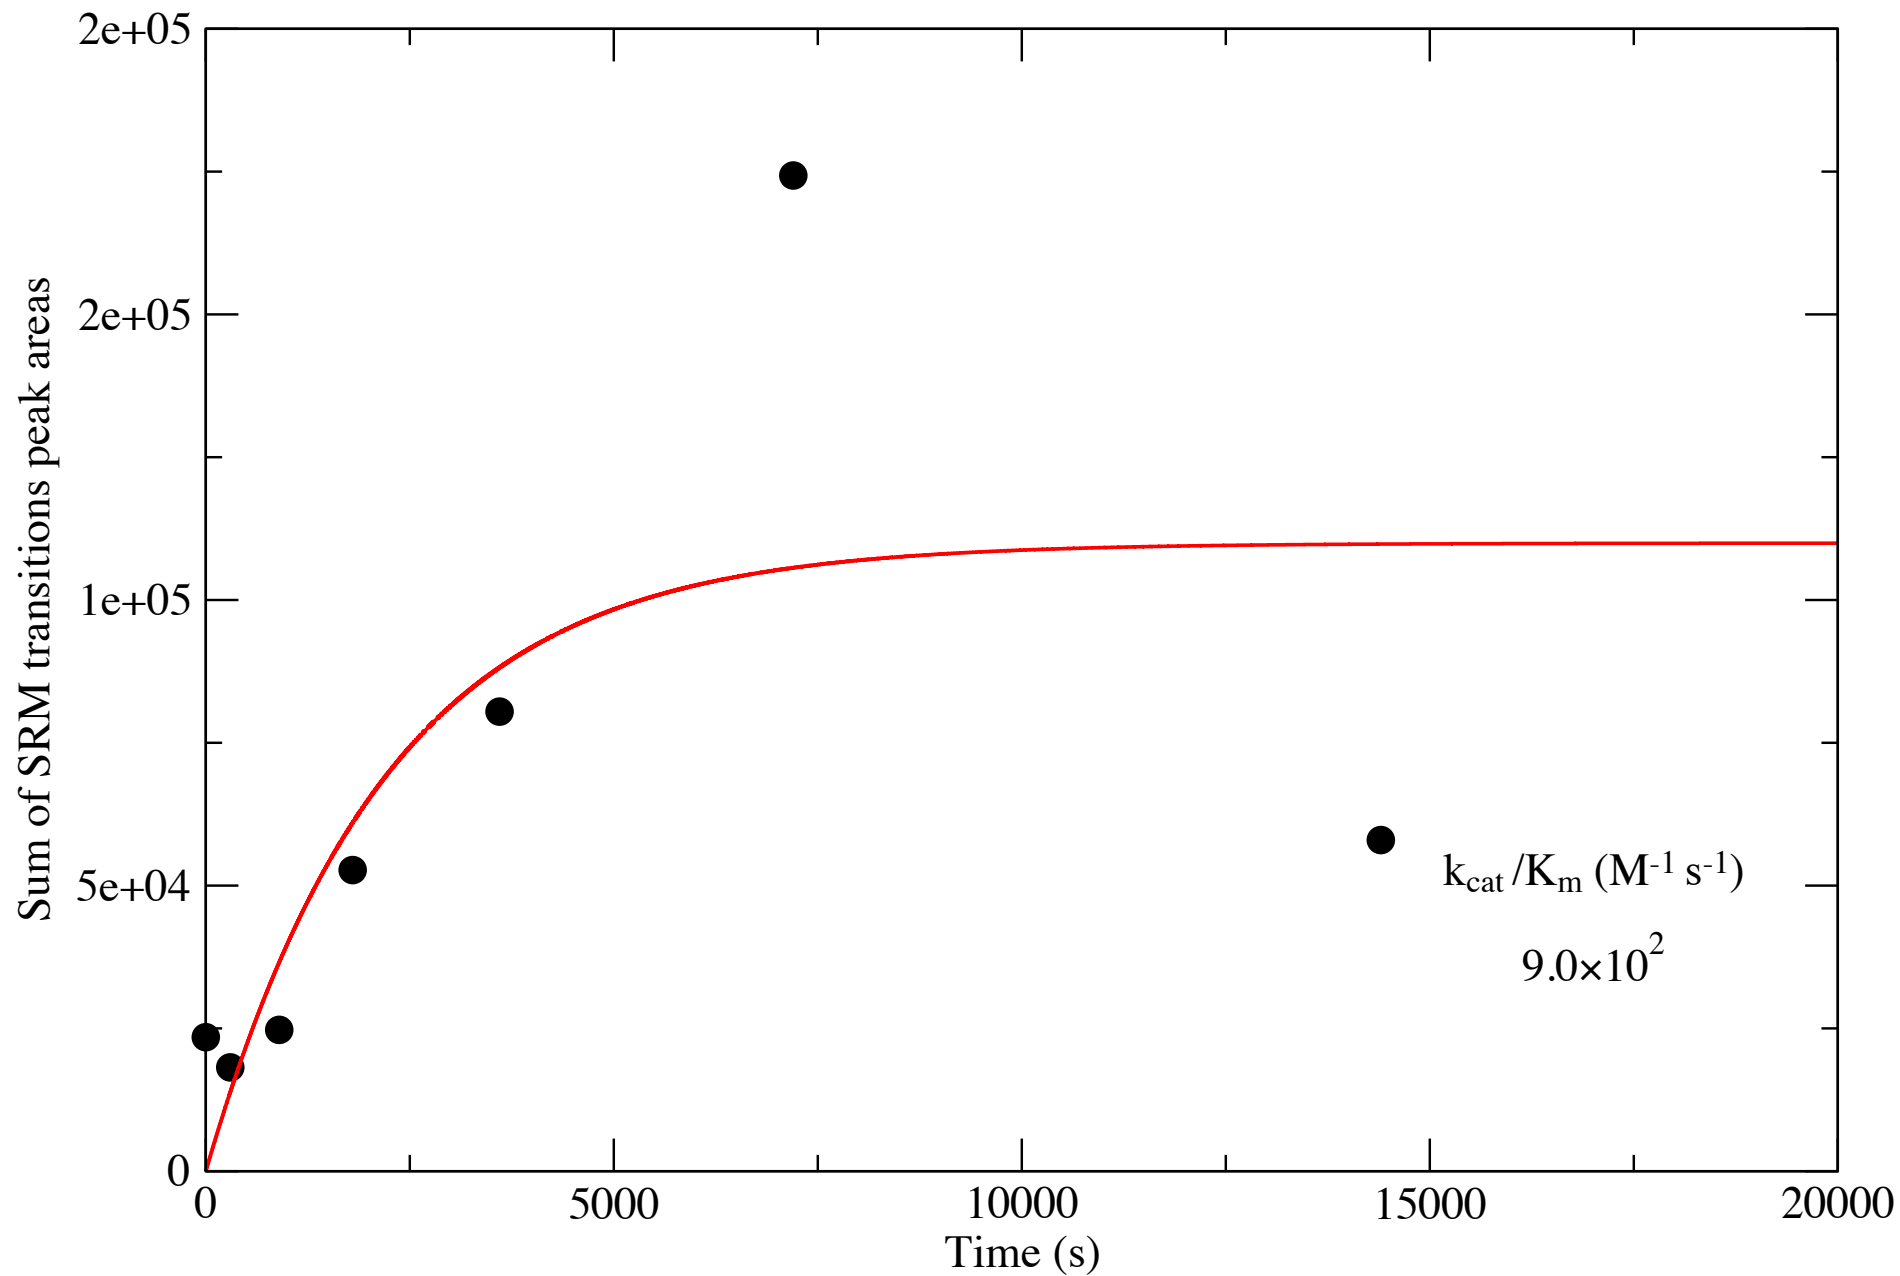

# NMT1\_HUMAN (SAQDQPVKMNSLPAER)

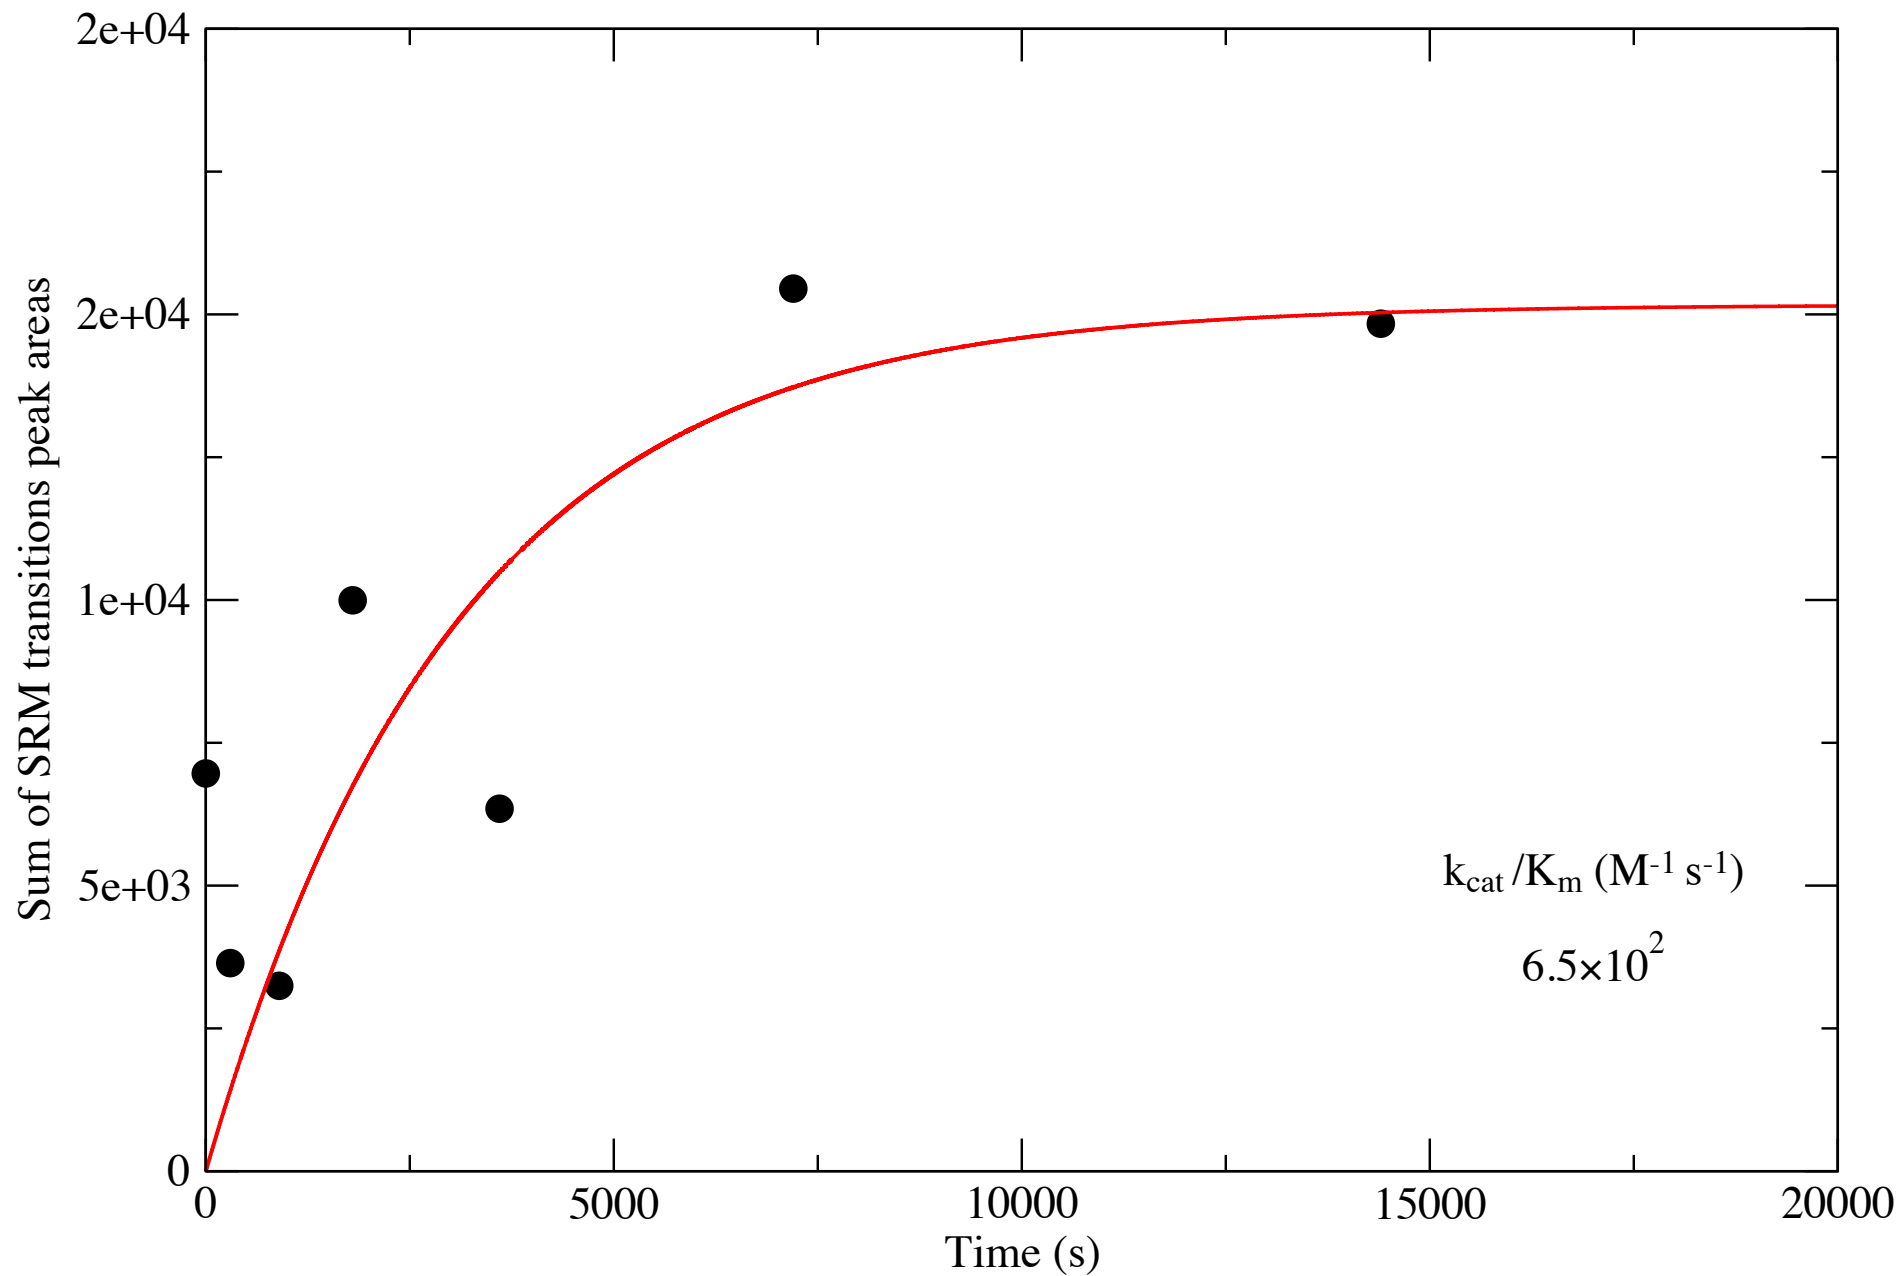

# NP1L4\_HUMAN (GVPSDSVEAAK)

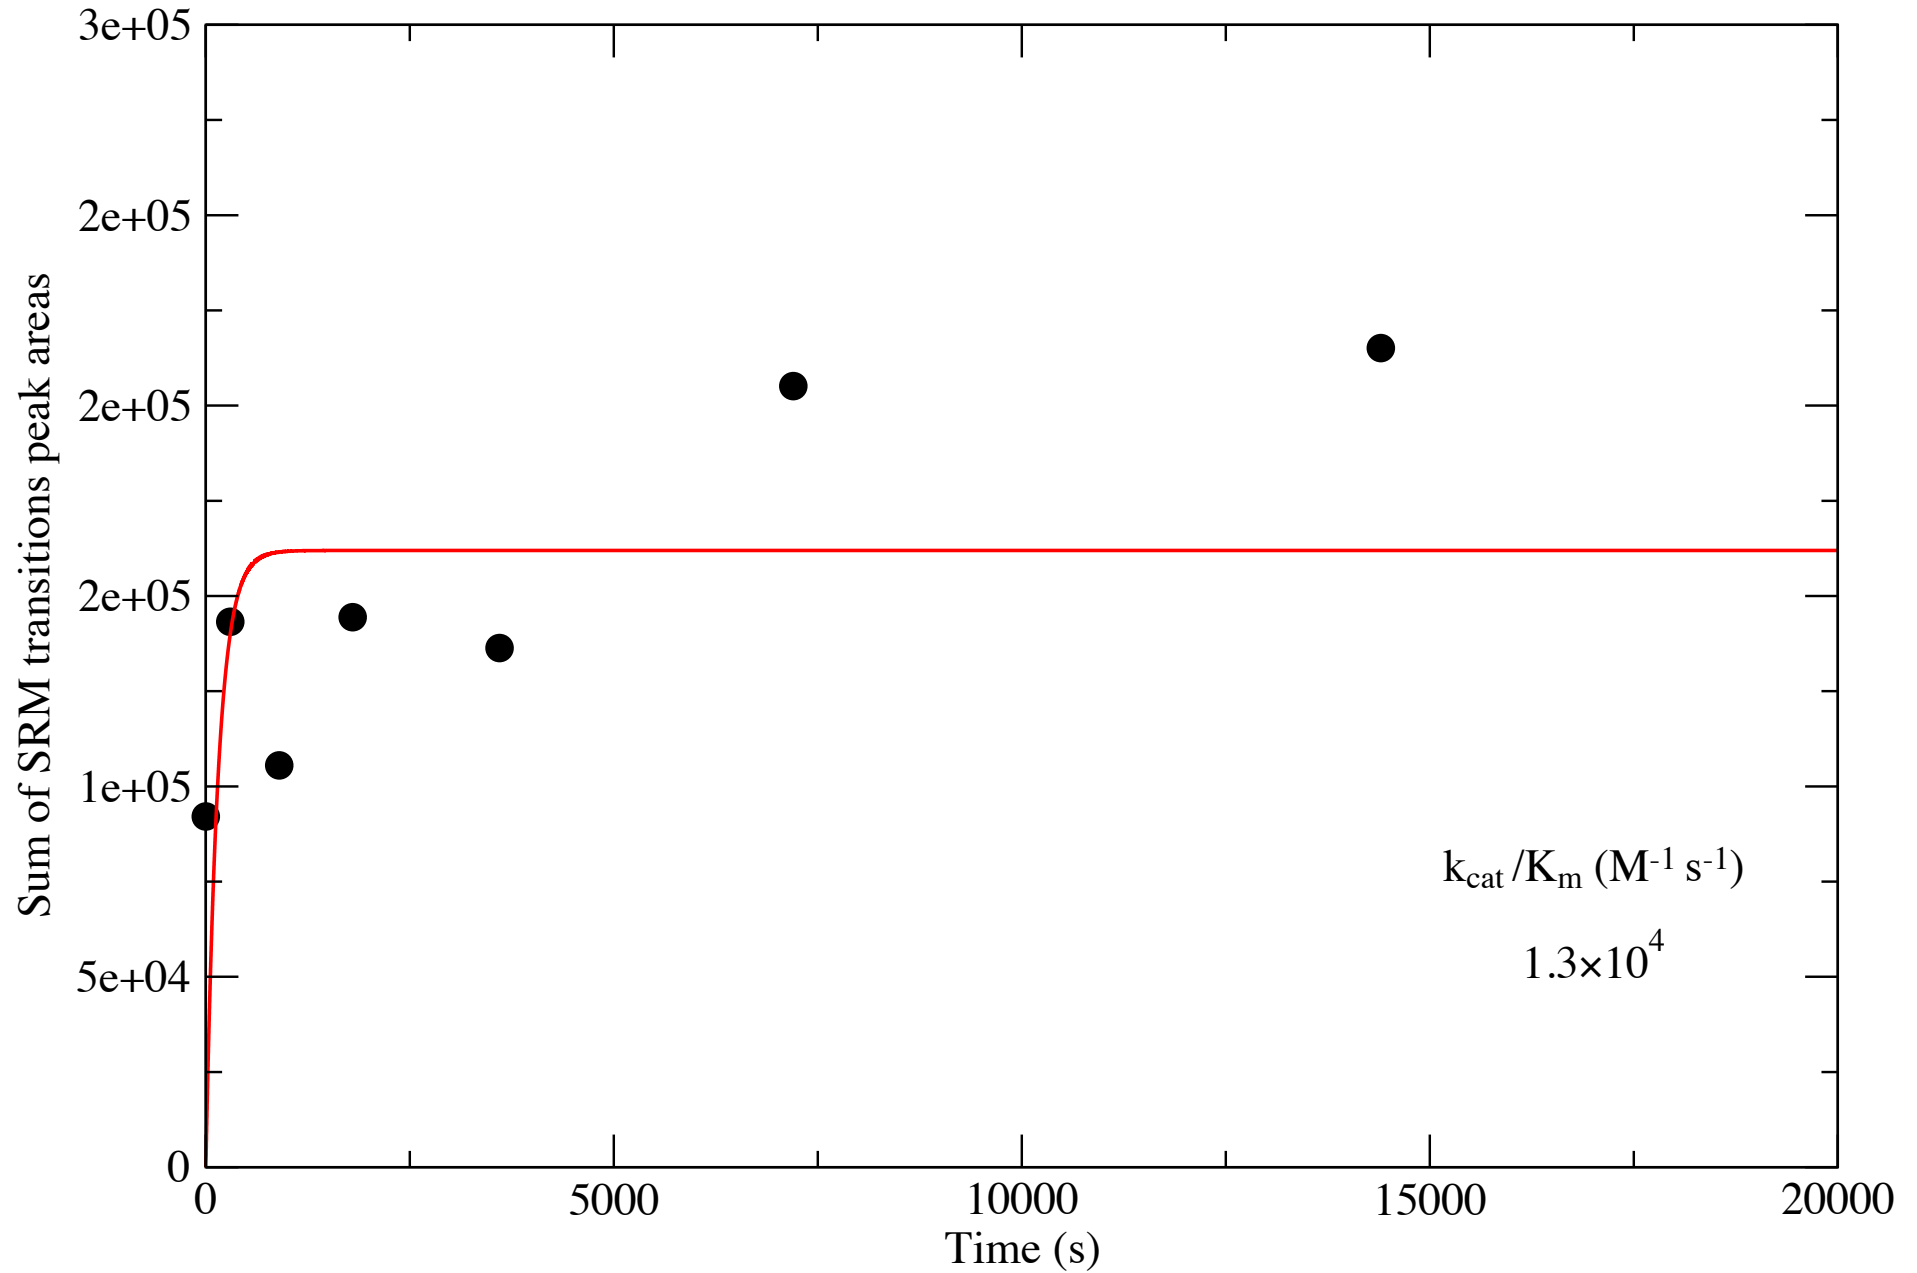

# PARP1\_HUMAN (GFSELR)

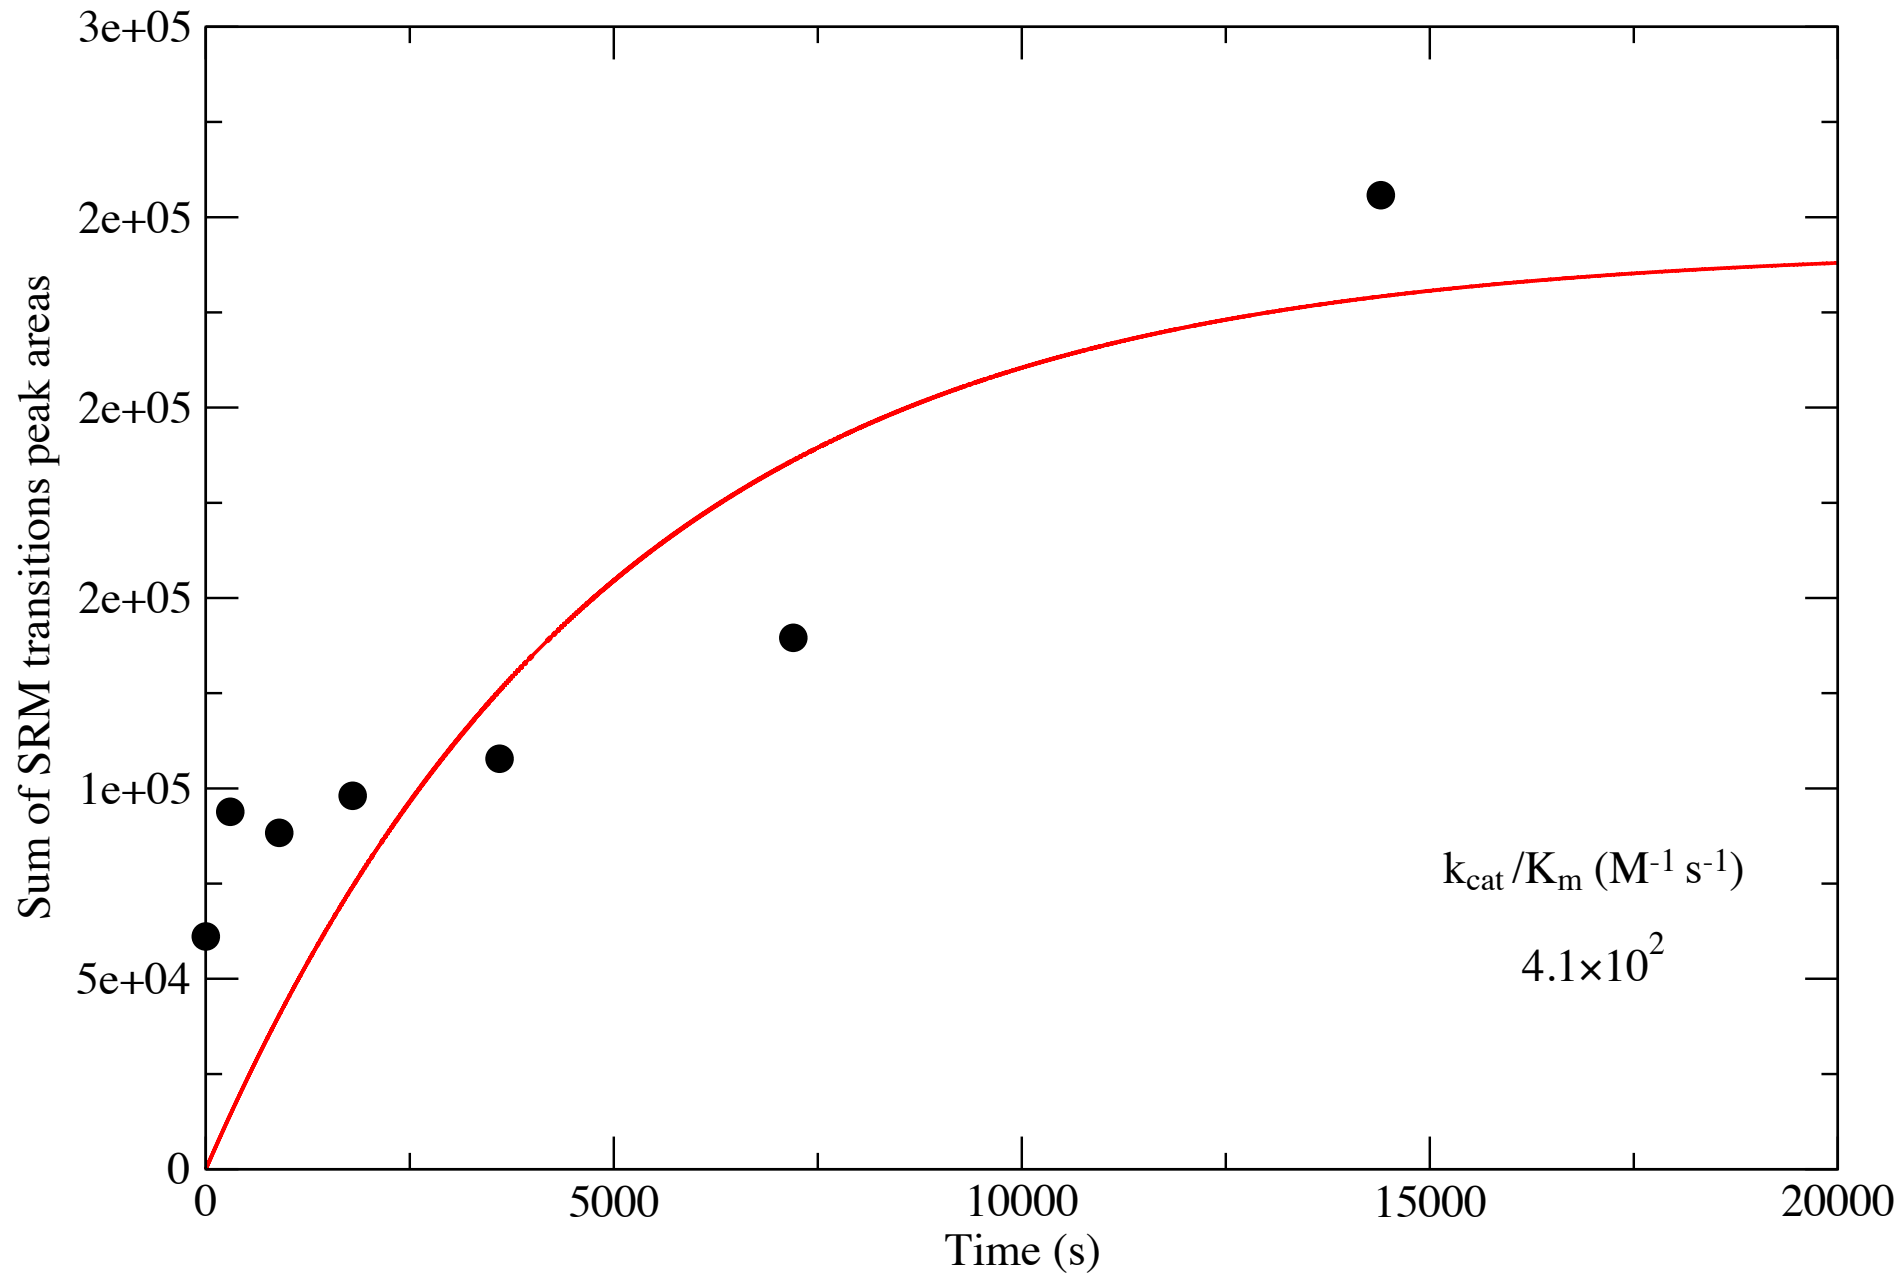

# PRC2B\_HUMAN (SVLPVPPIEFGVSPK)

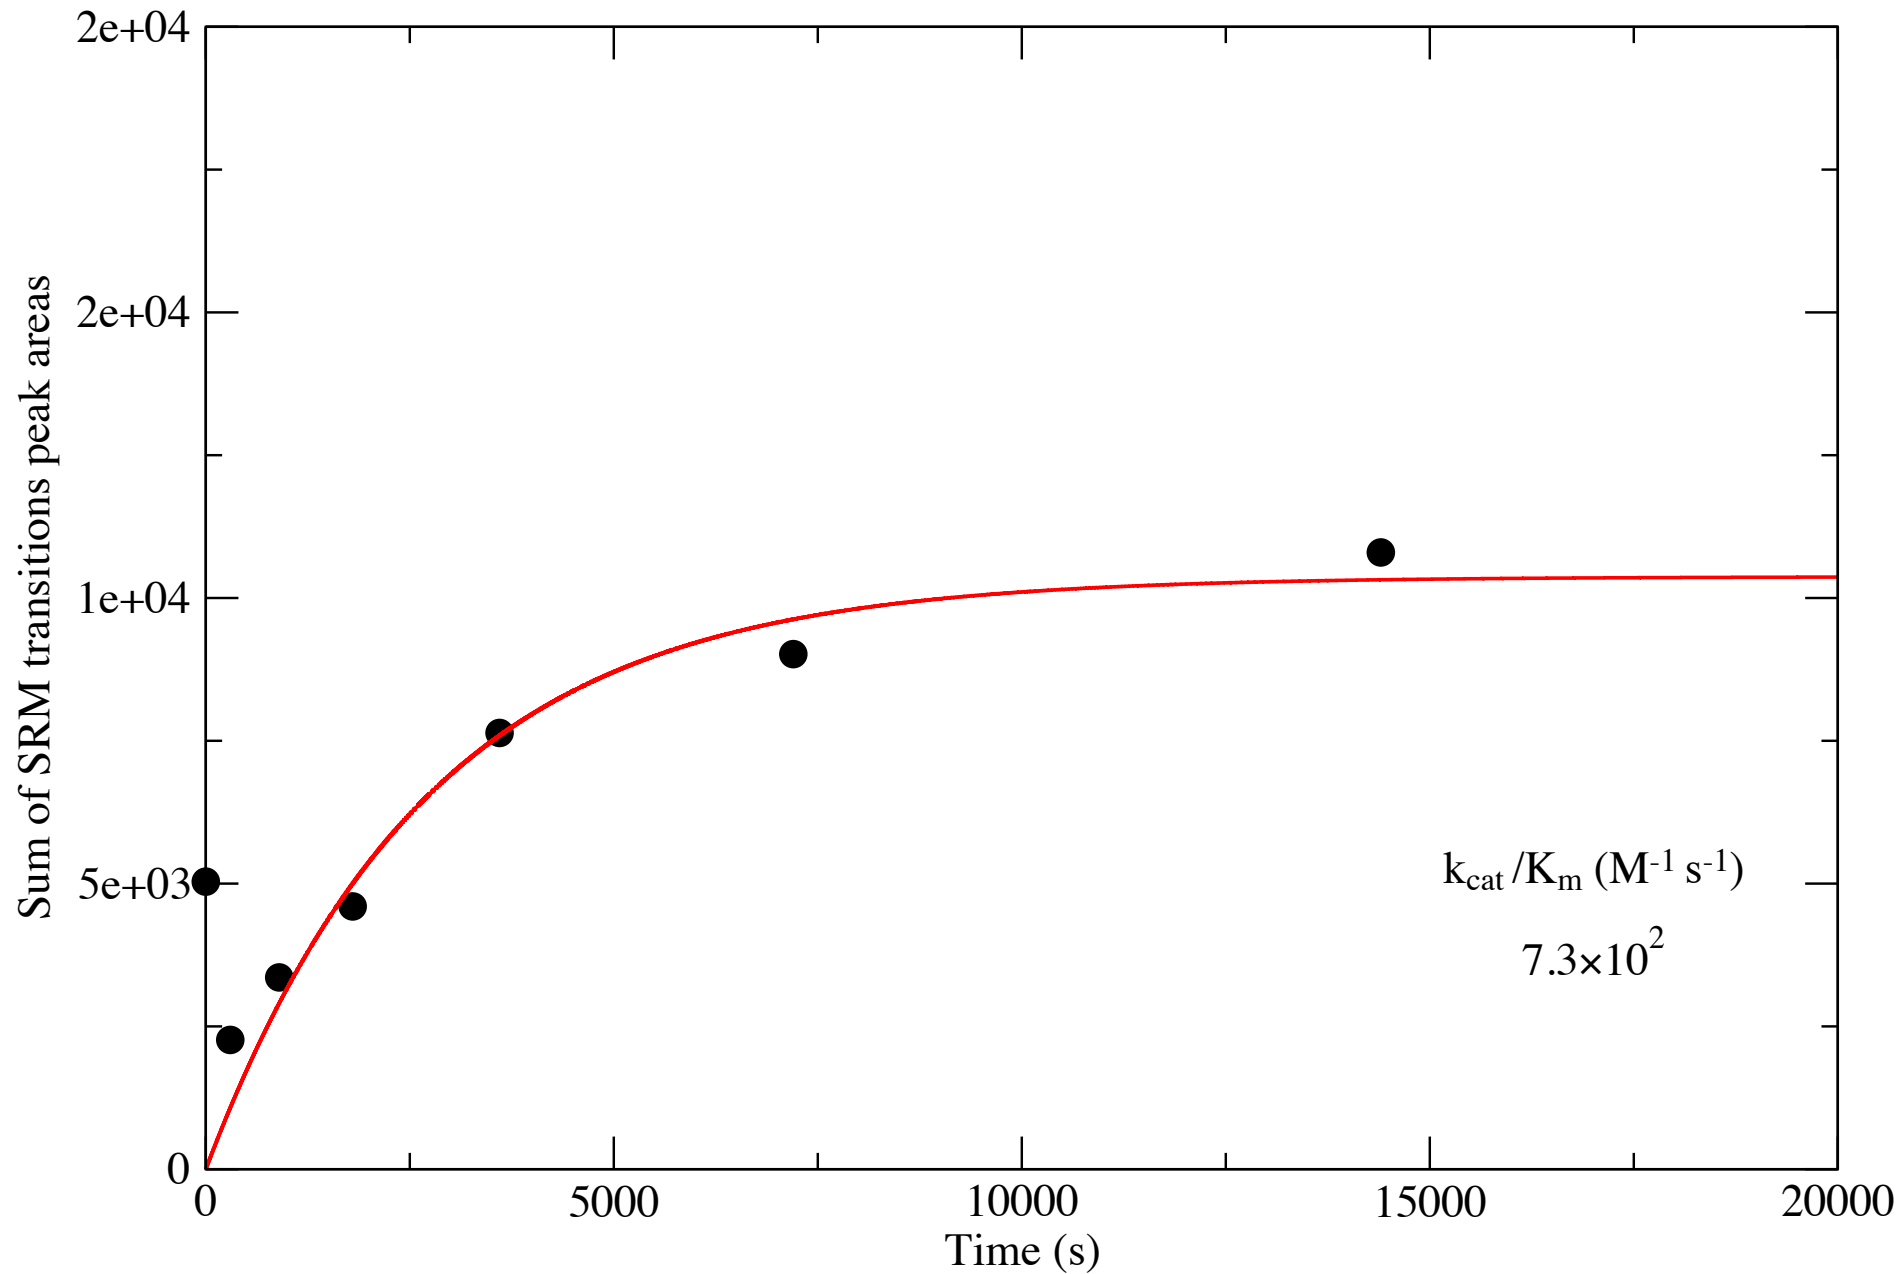

# PREX1\_HUMAN (SAFPLLSLGPR)

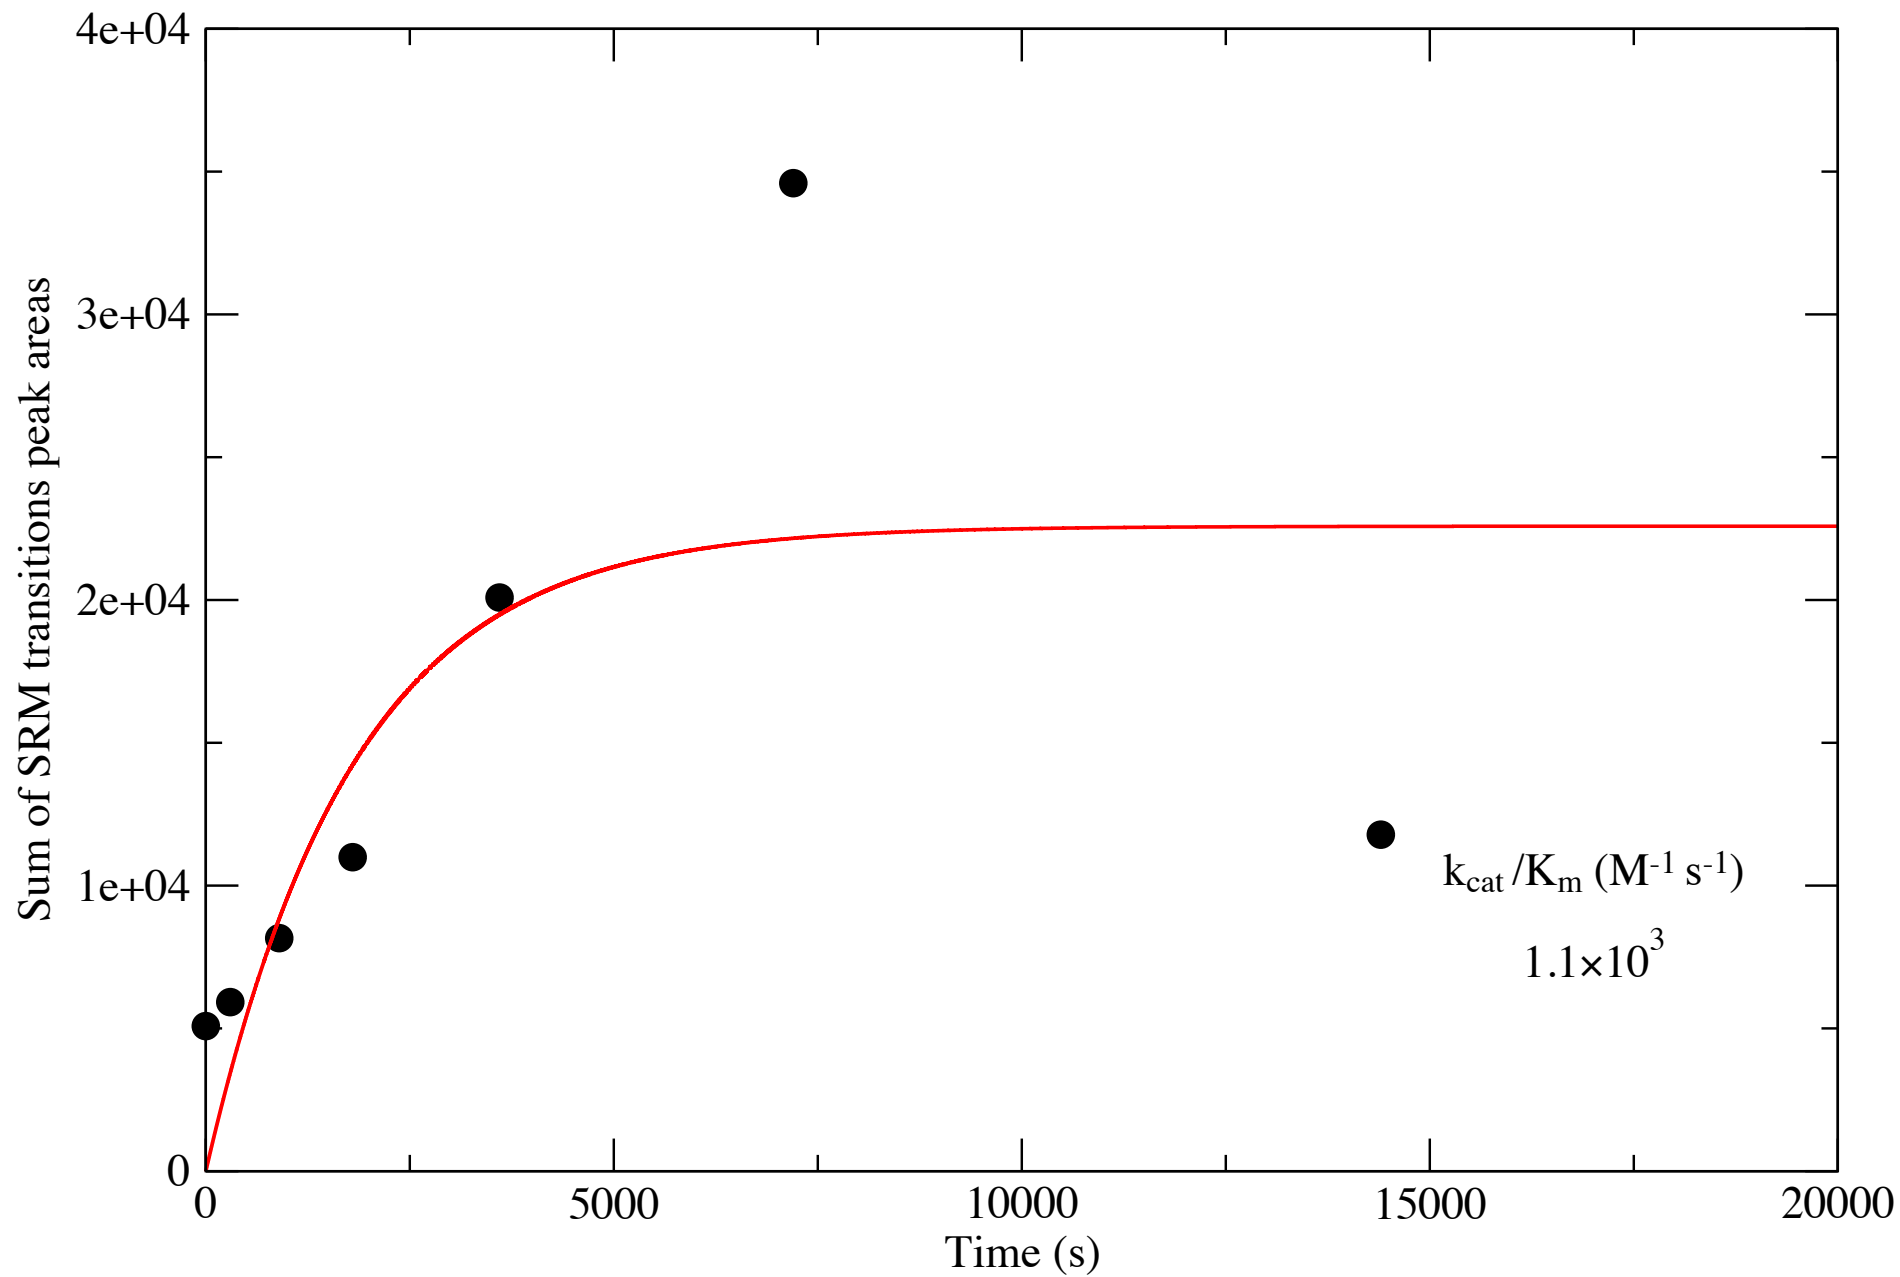



# PTMA\_HUMAN (AAVDTSSSEITTK)

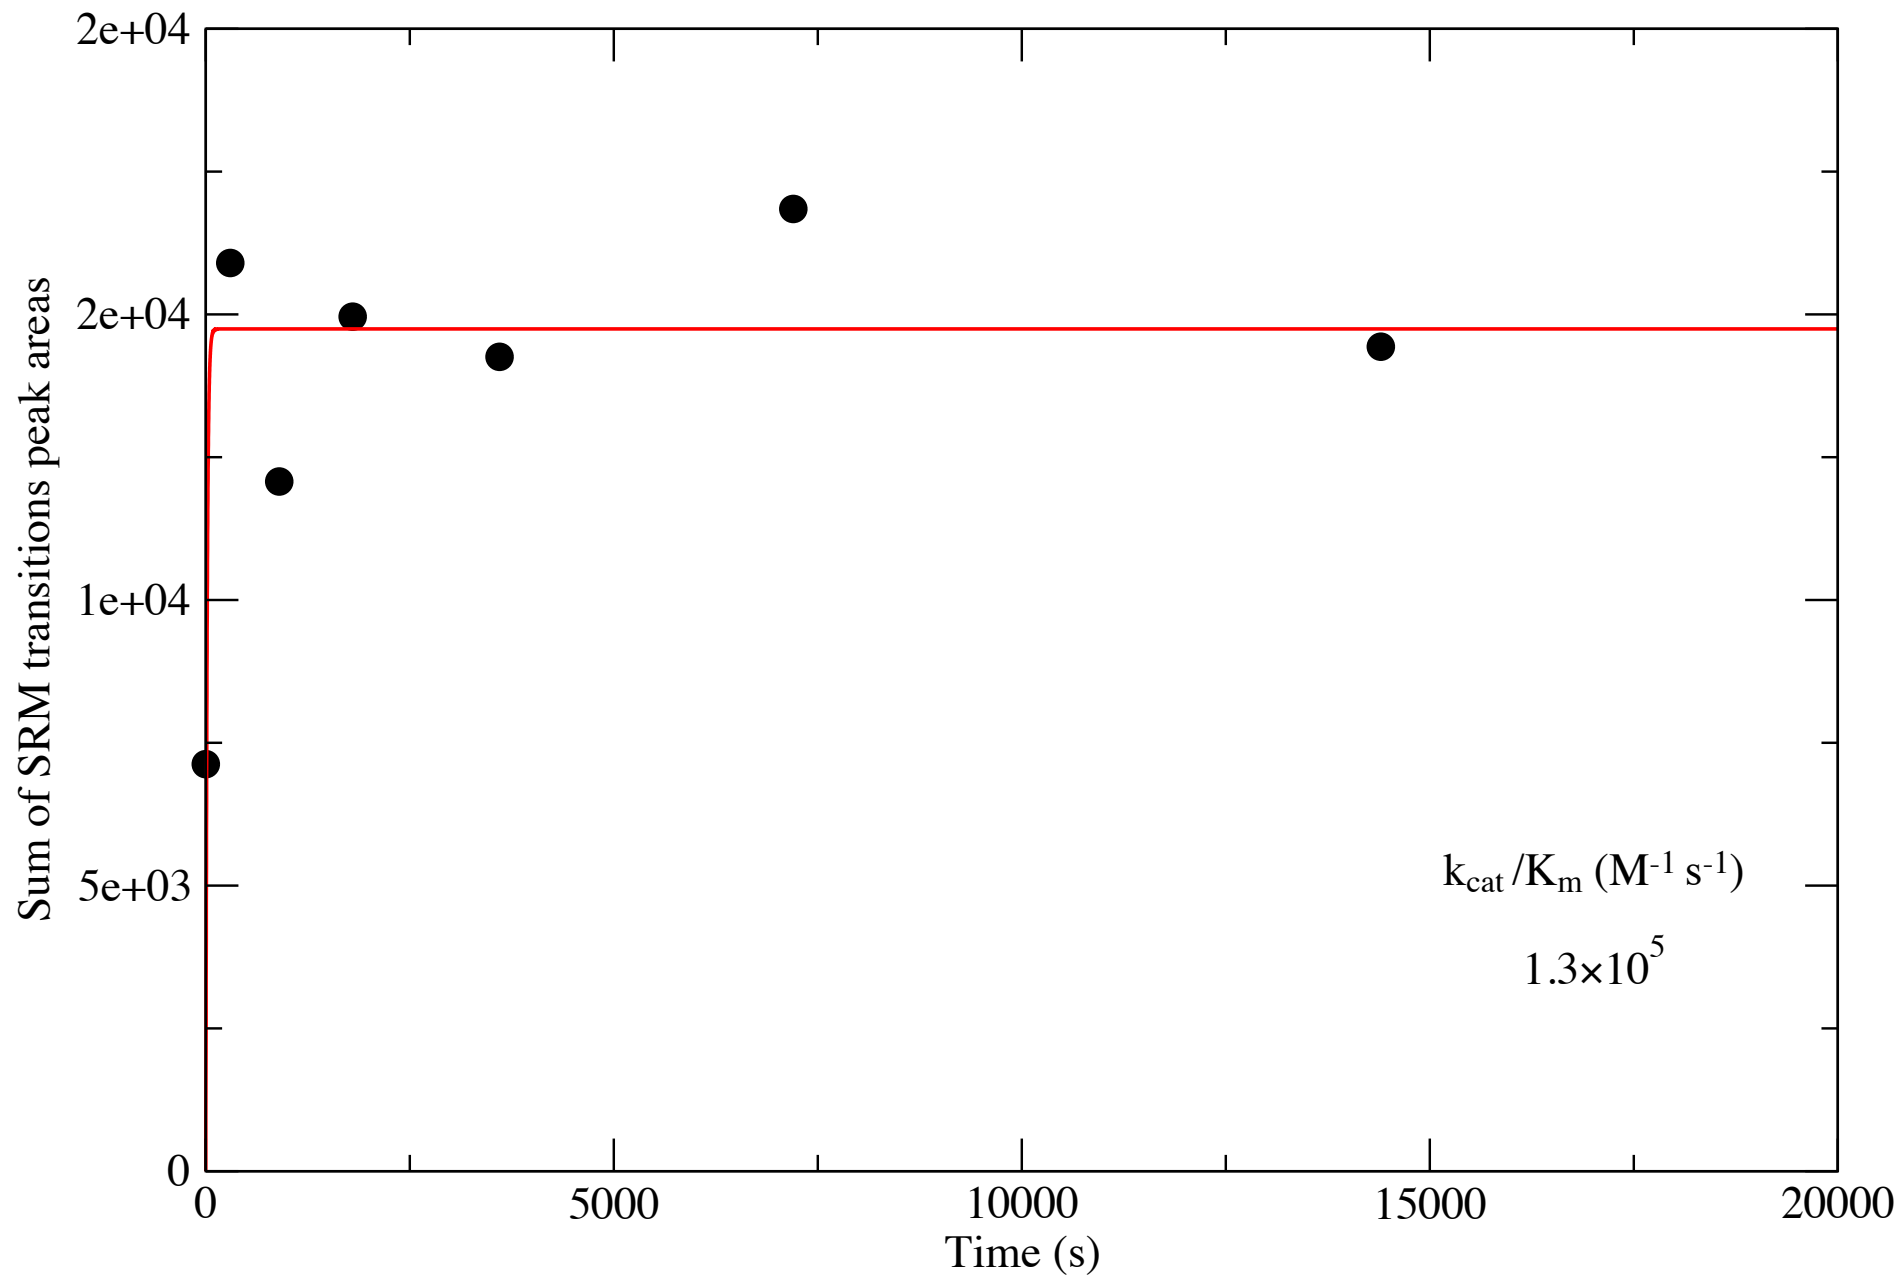

# RGPA1\_HUMAN (GLSLQFK)

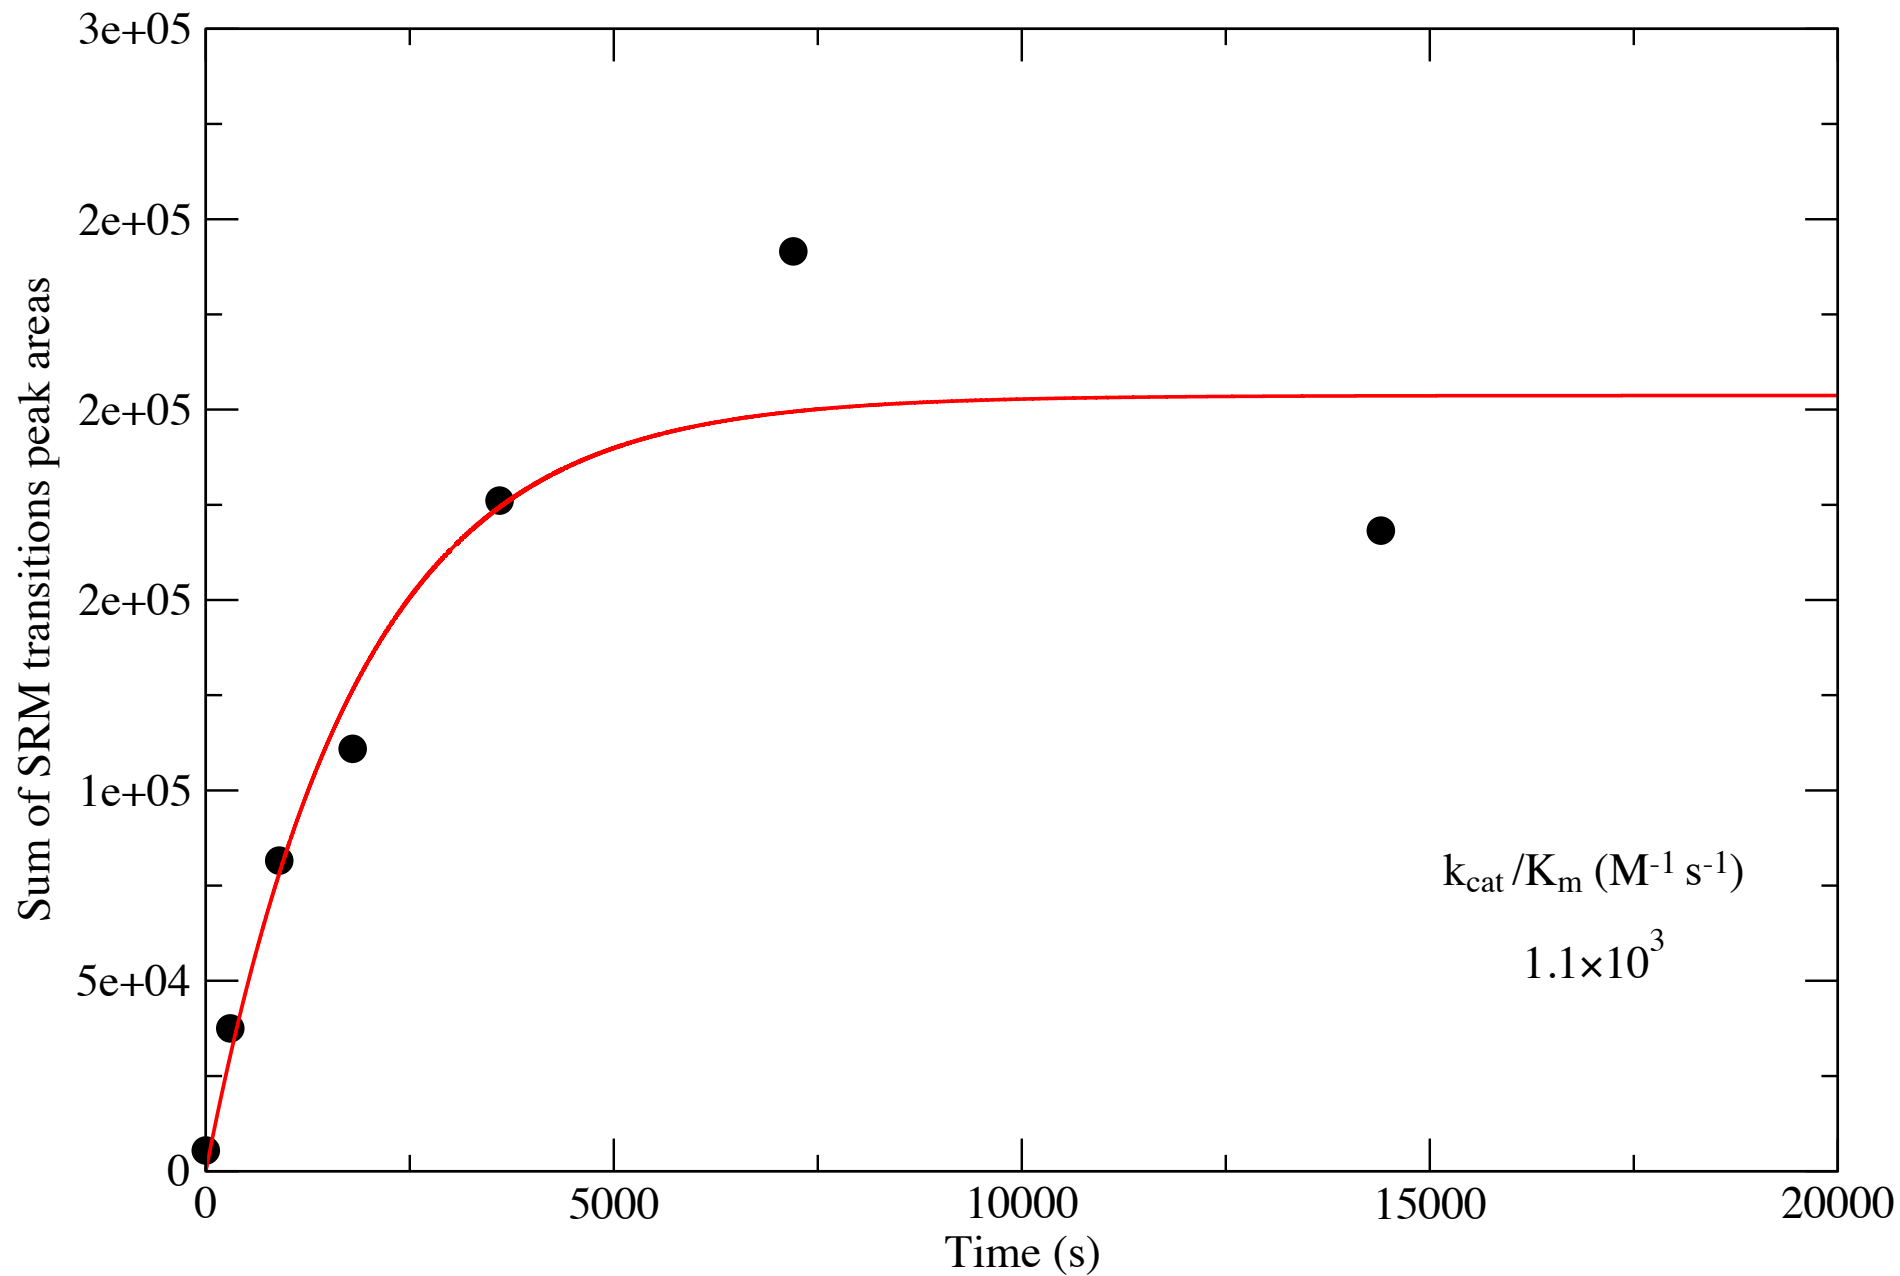

# RSRC1\_HUMAN (SFVQQTFR)

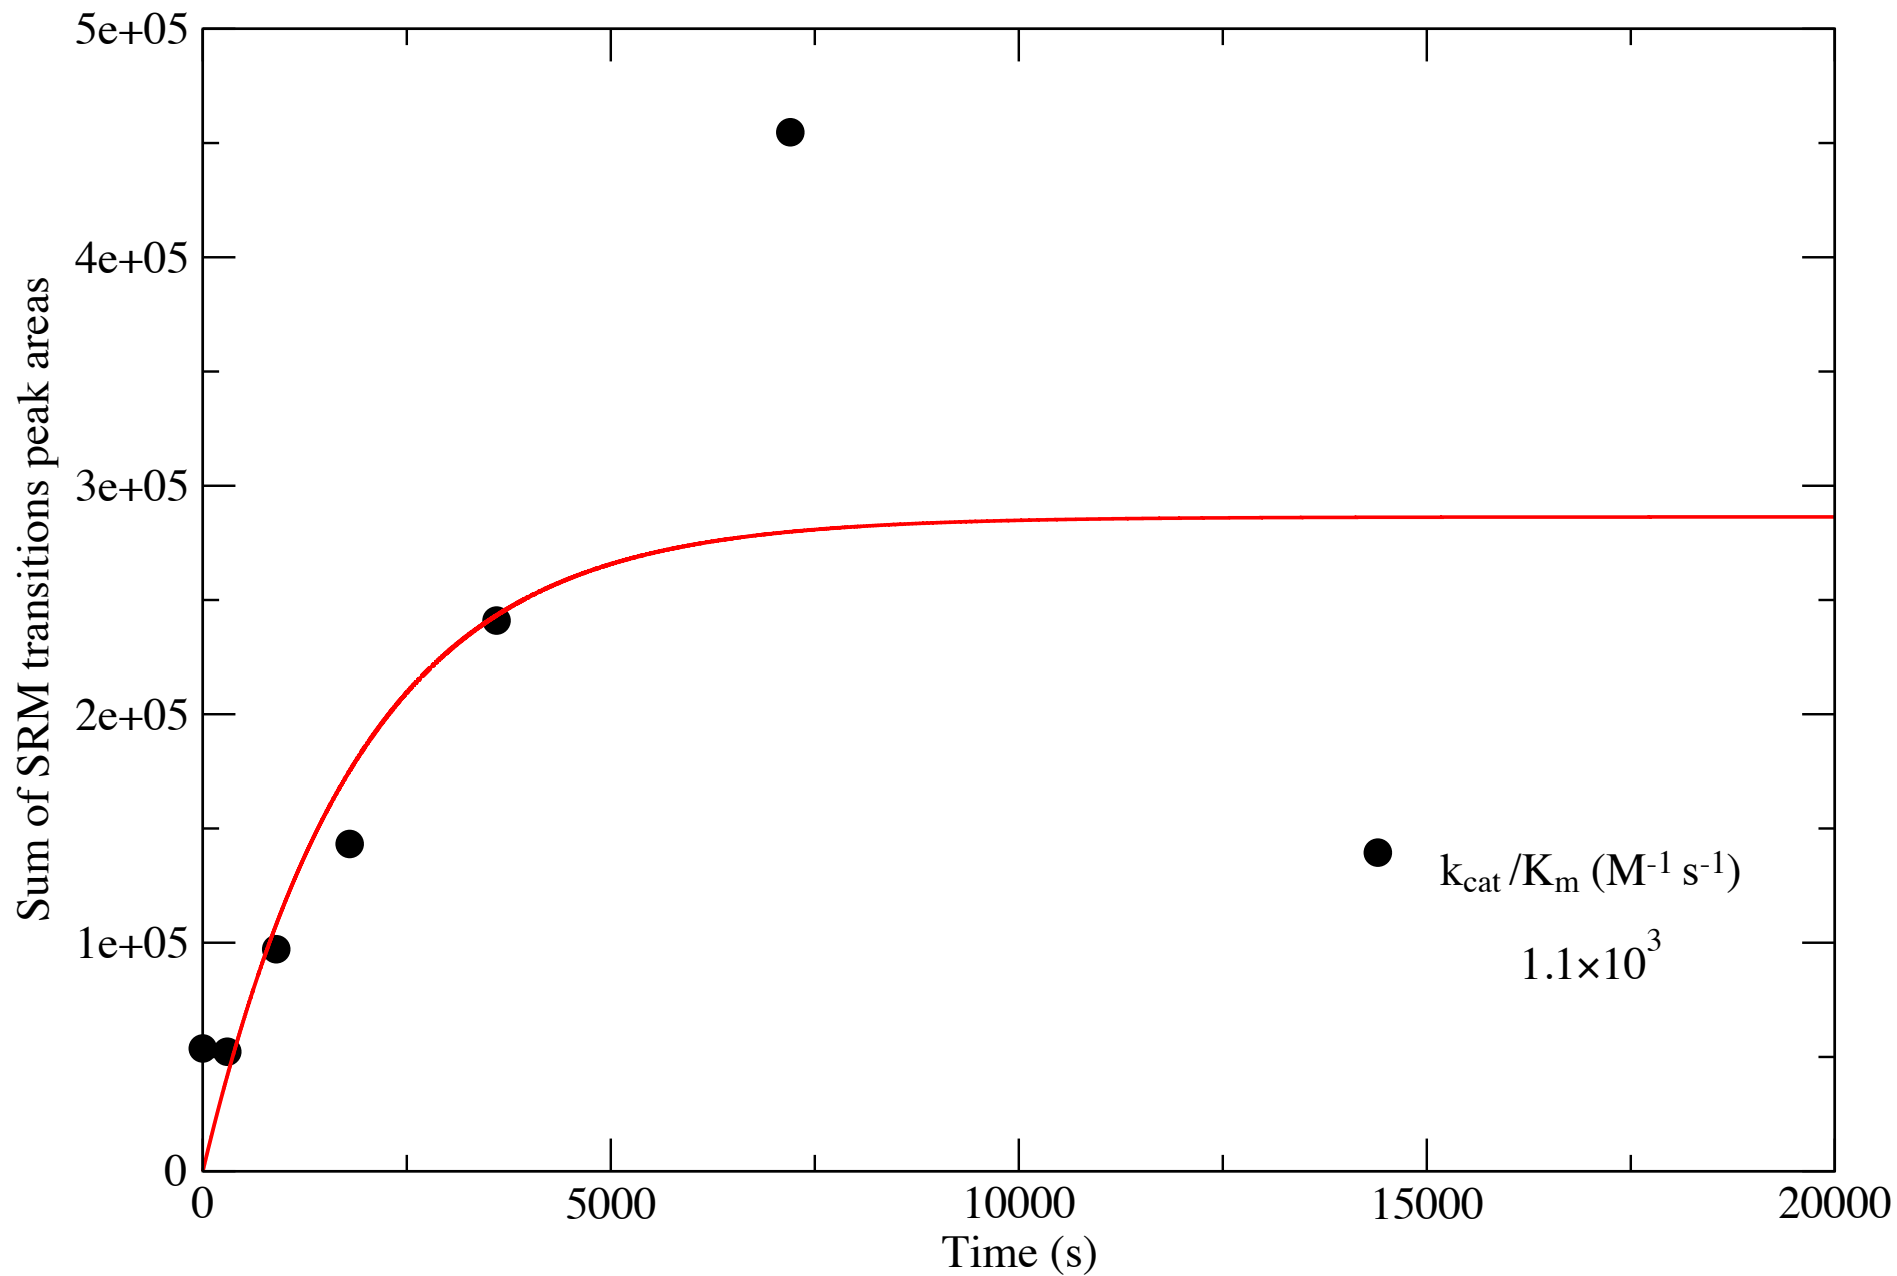

# SAFB2\_HUMAN (GLLDSFCDSK)

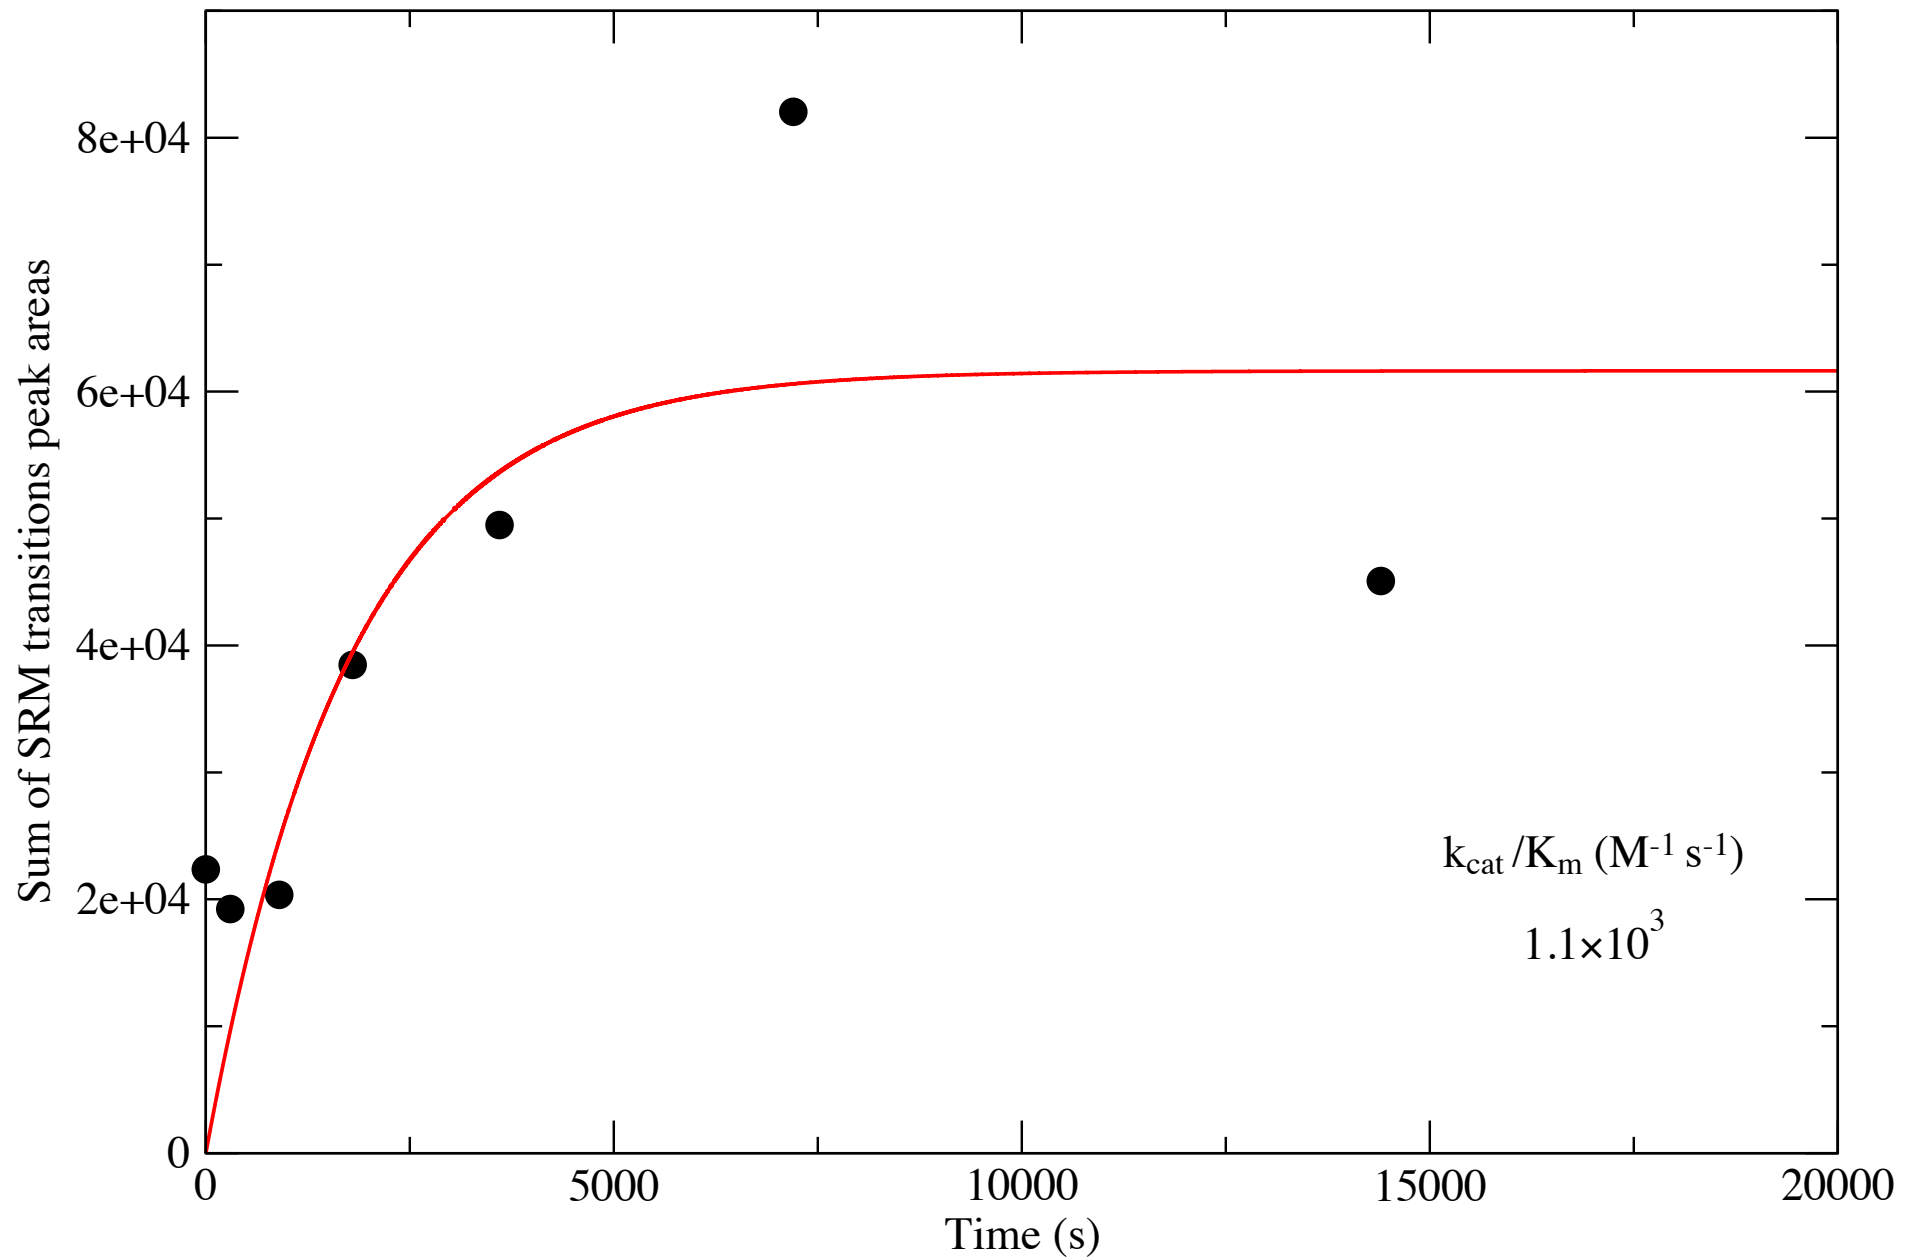

# SAFB2\_HUMAN (GWGGYGSDKR)

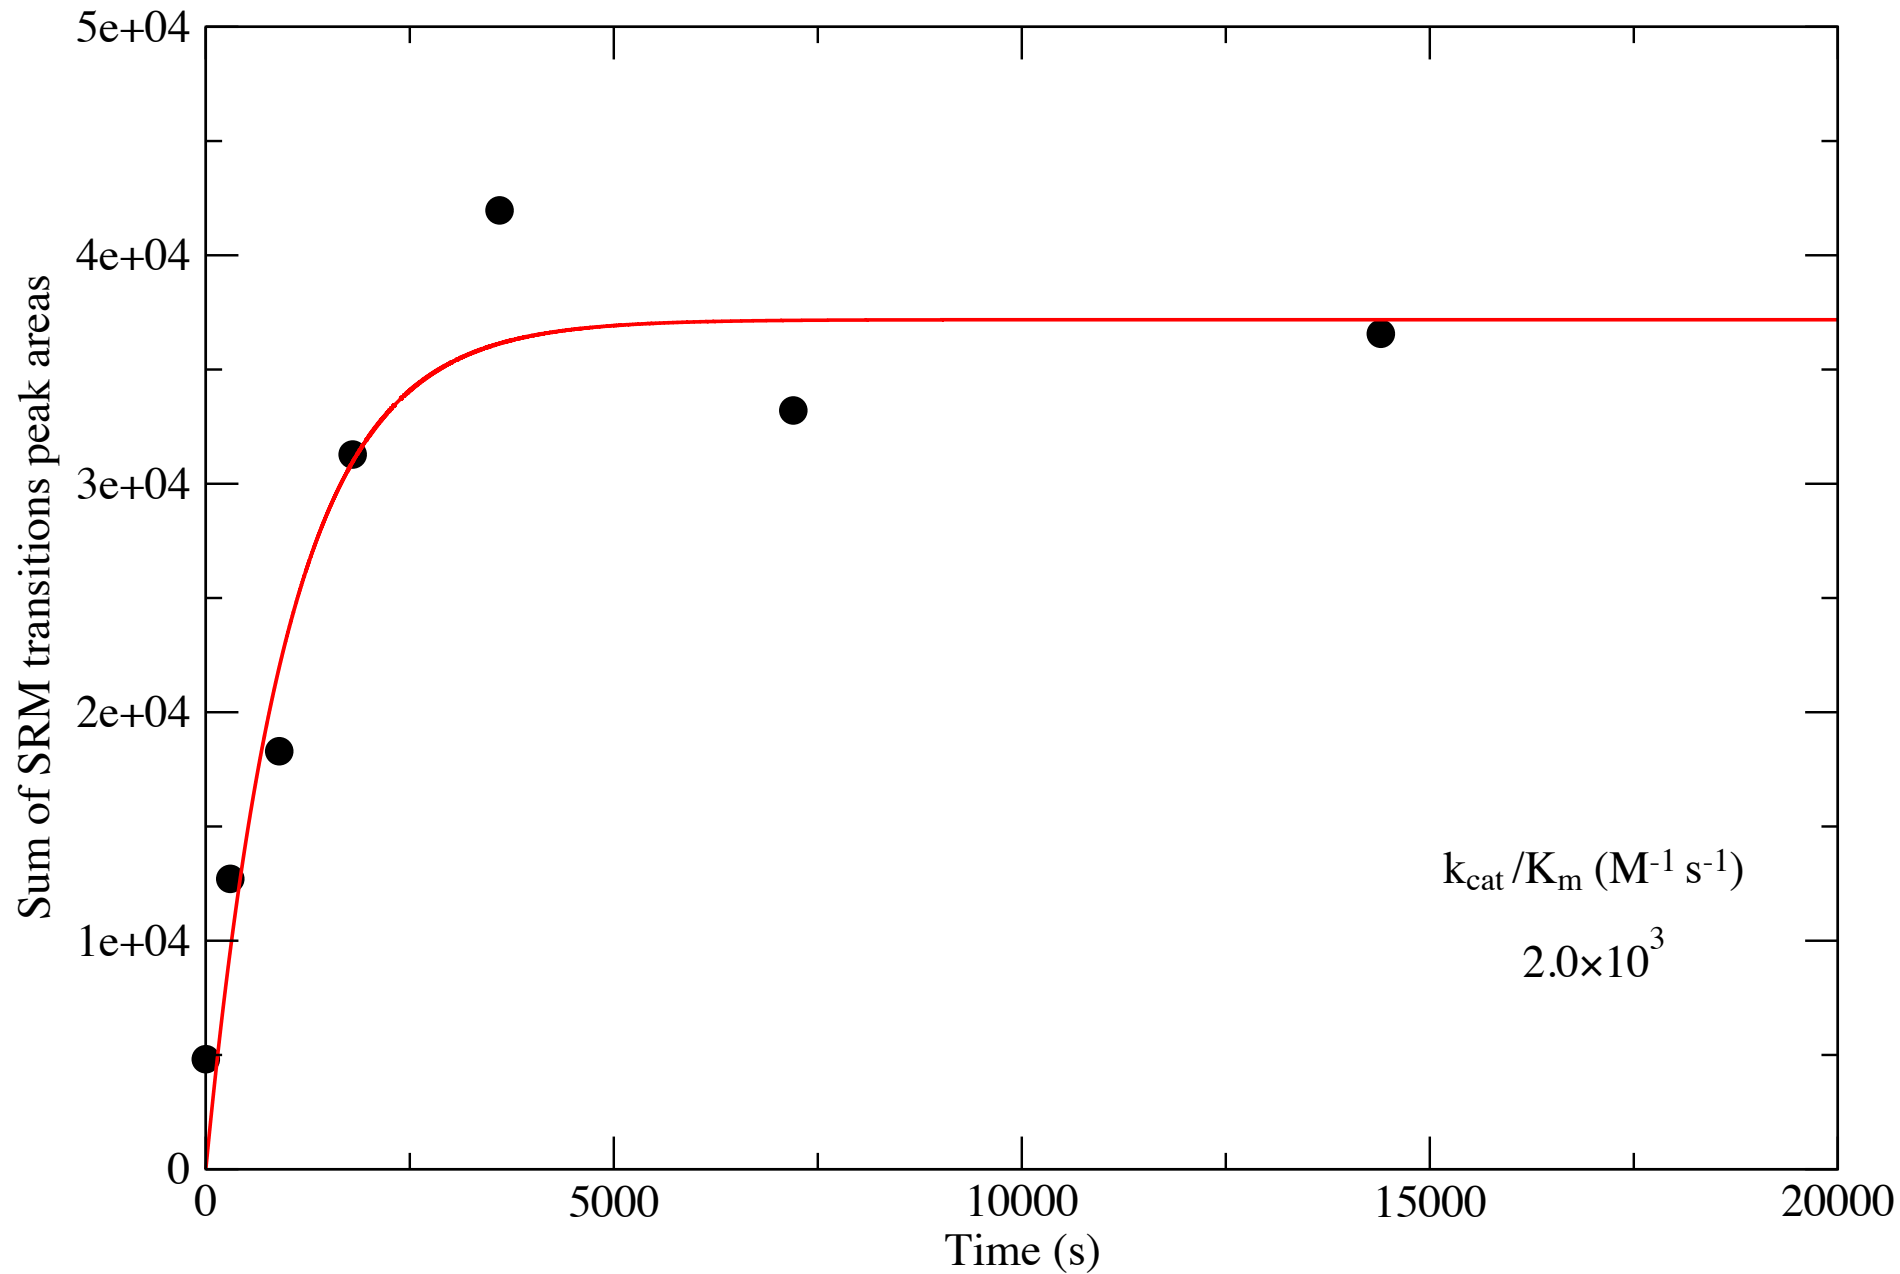

# SC16A\_HUMAN (SGPTQPPLSLSPAPETK)

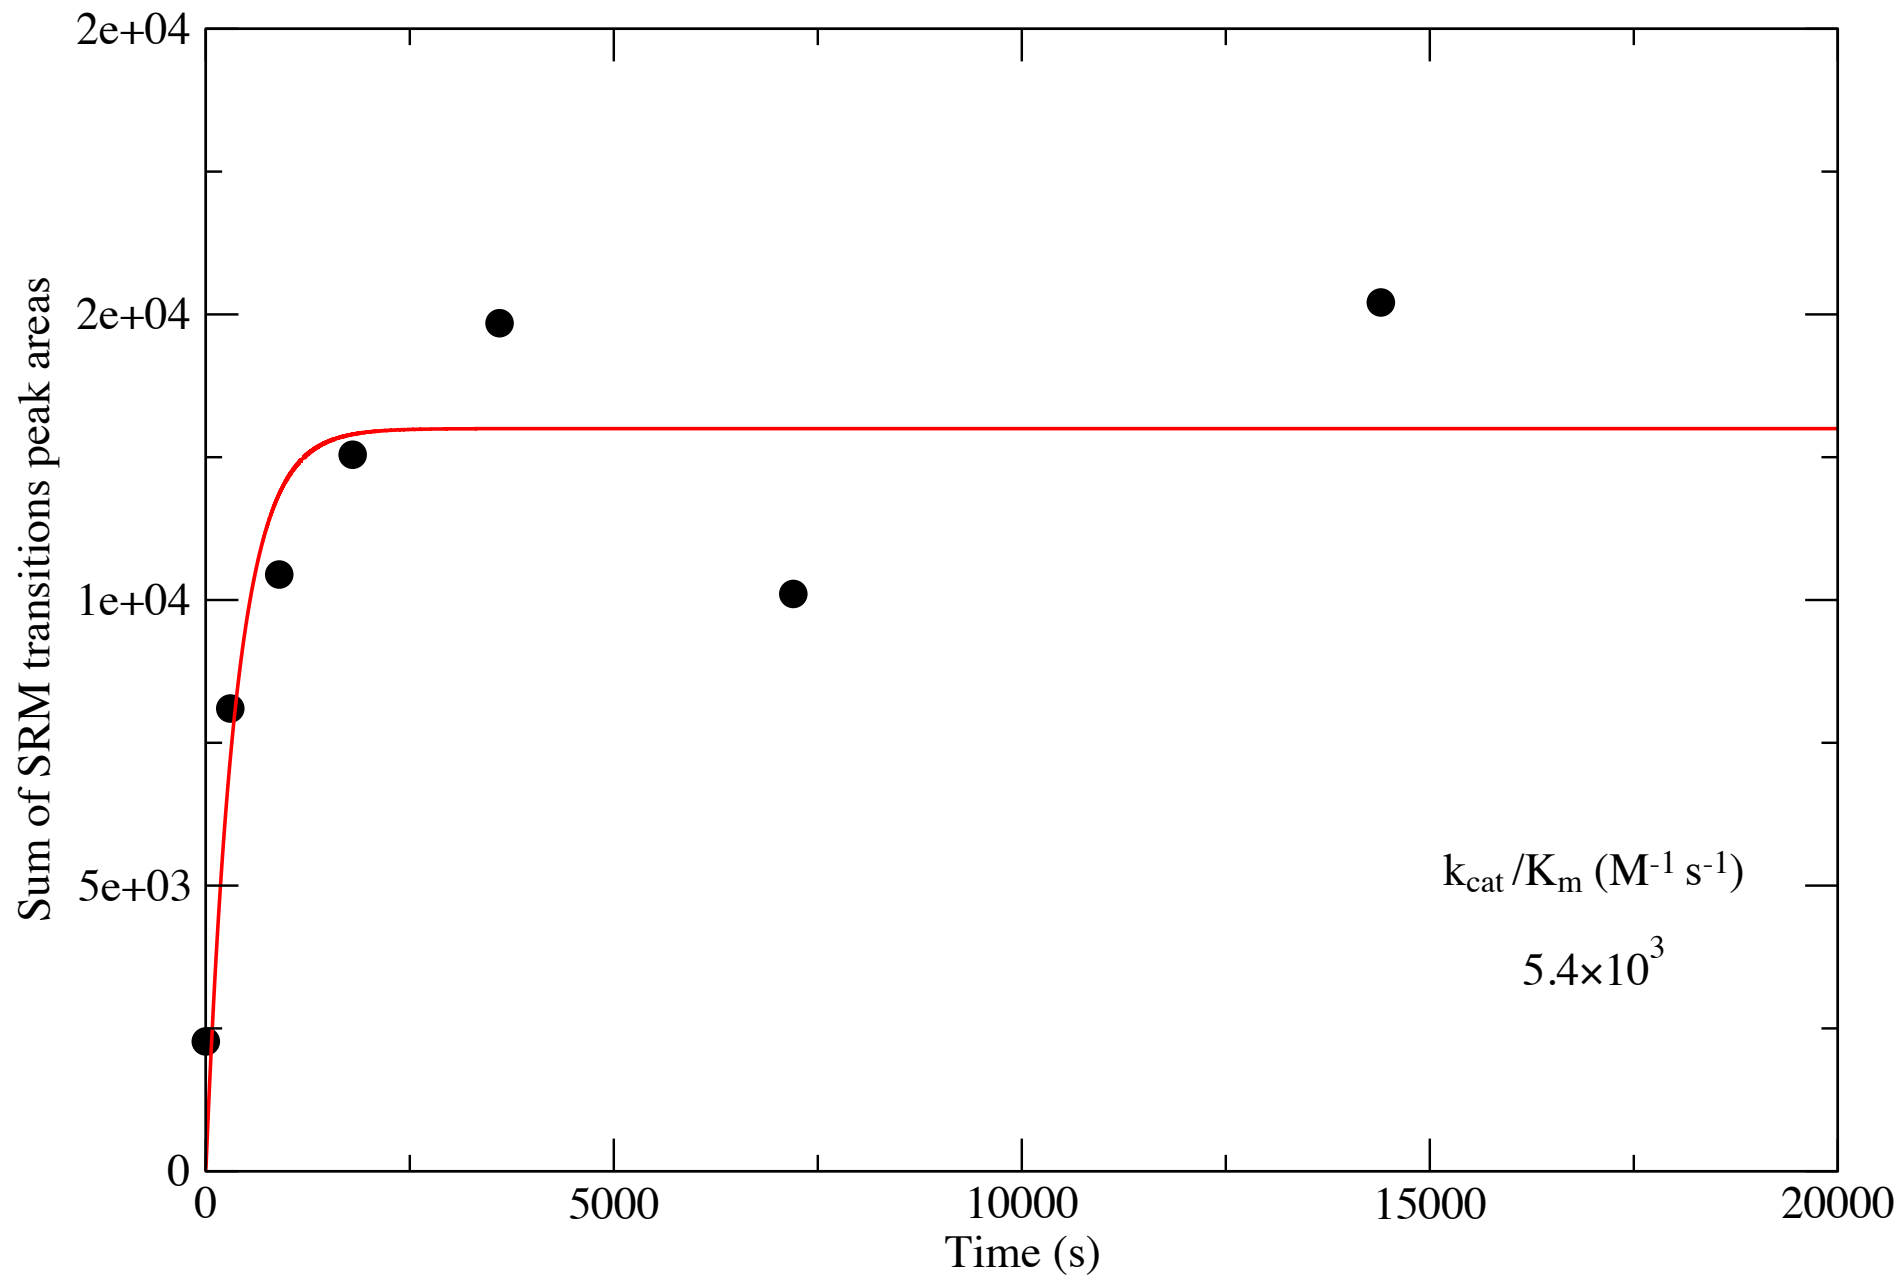

# SC16A\_HUMAN (SVSSSYSSR)

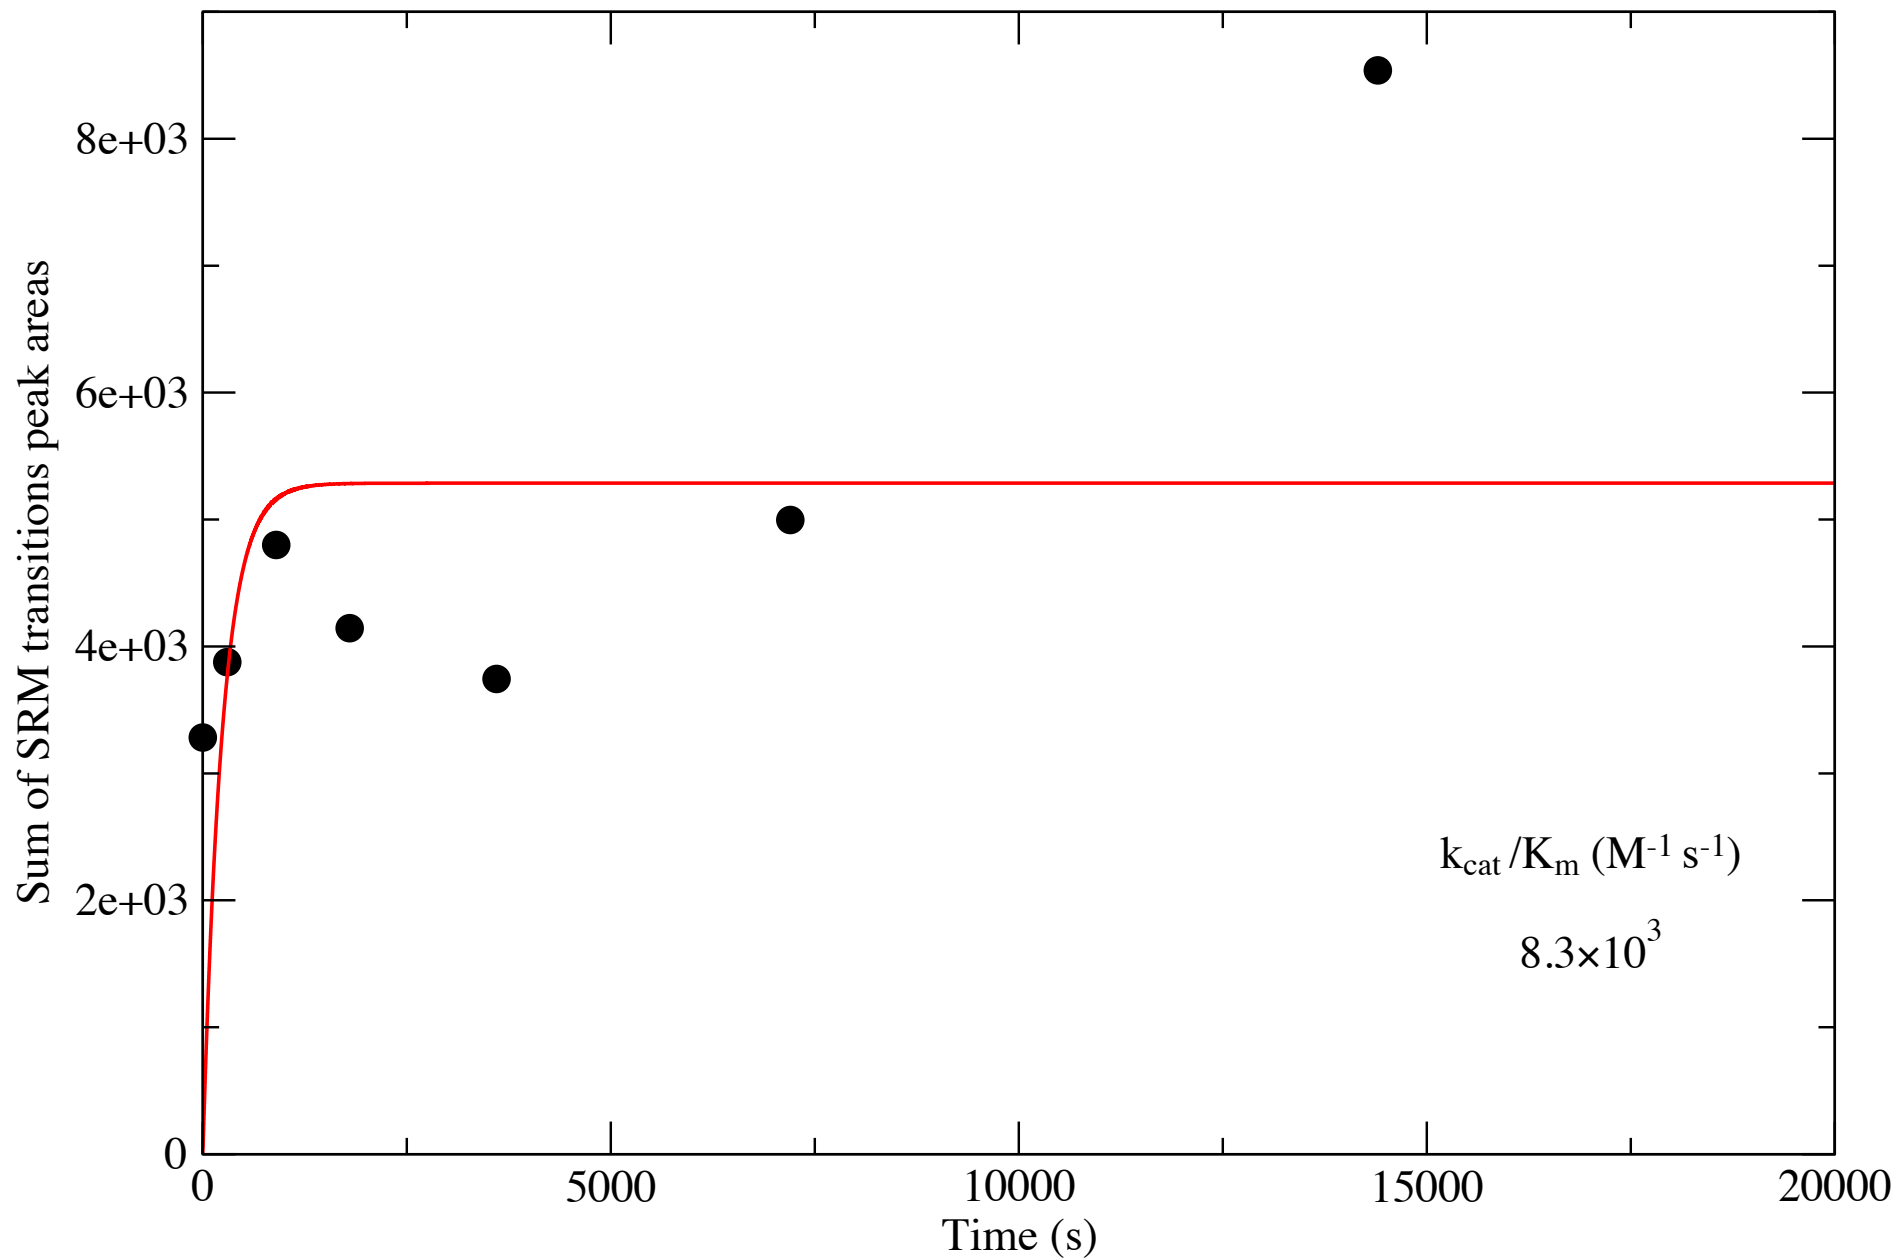

# SR140\_HUMAN (GVPIKSLDDDDLDGVPLDATEDSK)

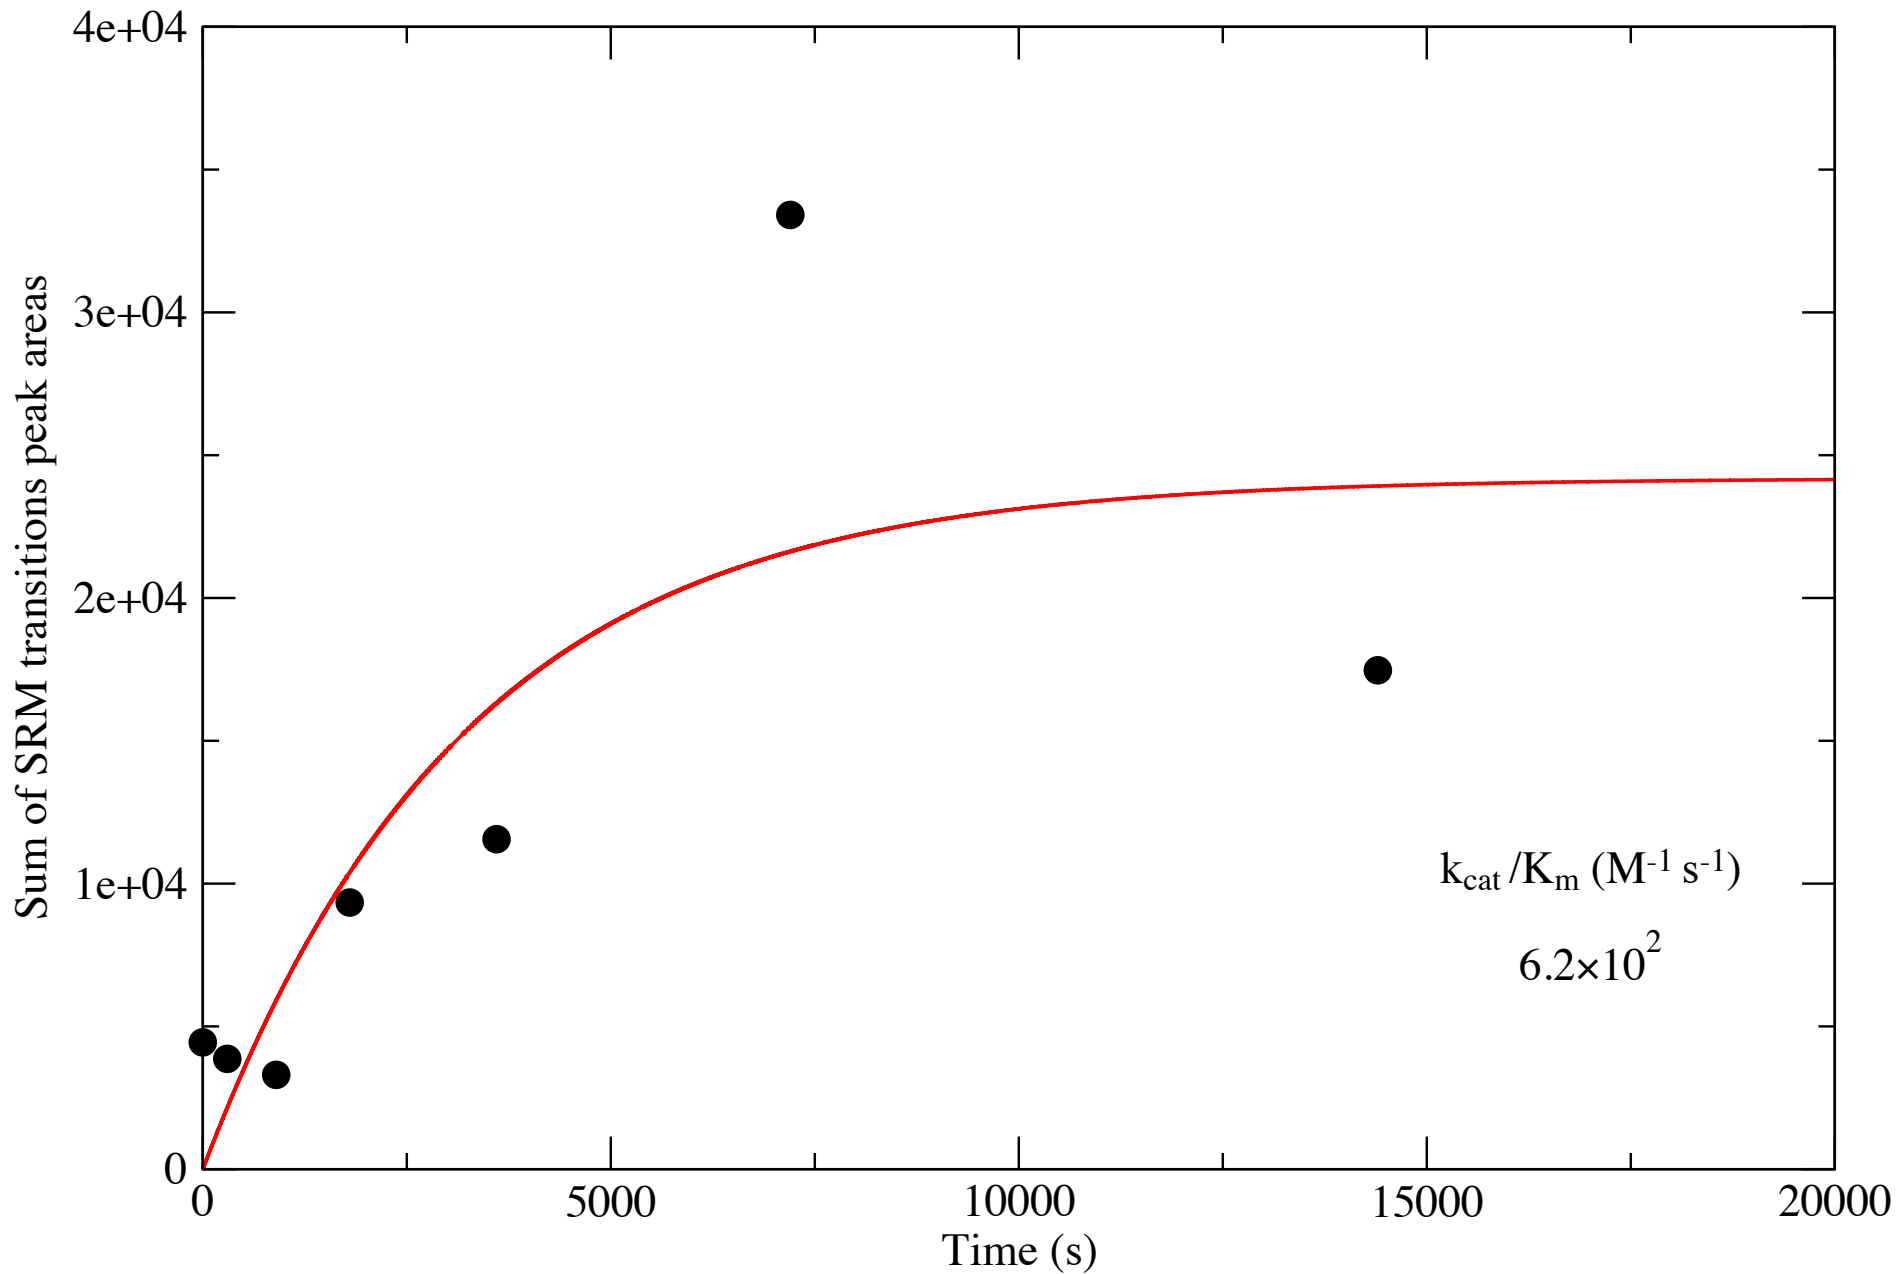



# TCOF\_HUMAN (GEVPTAVAPAQEK)

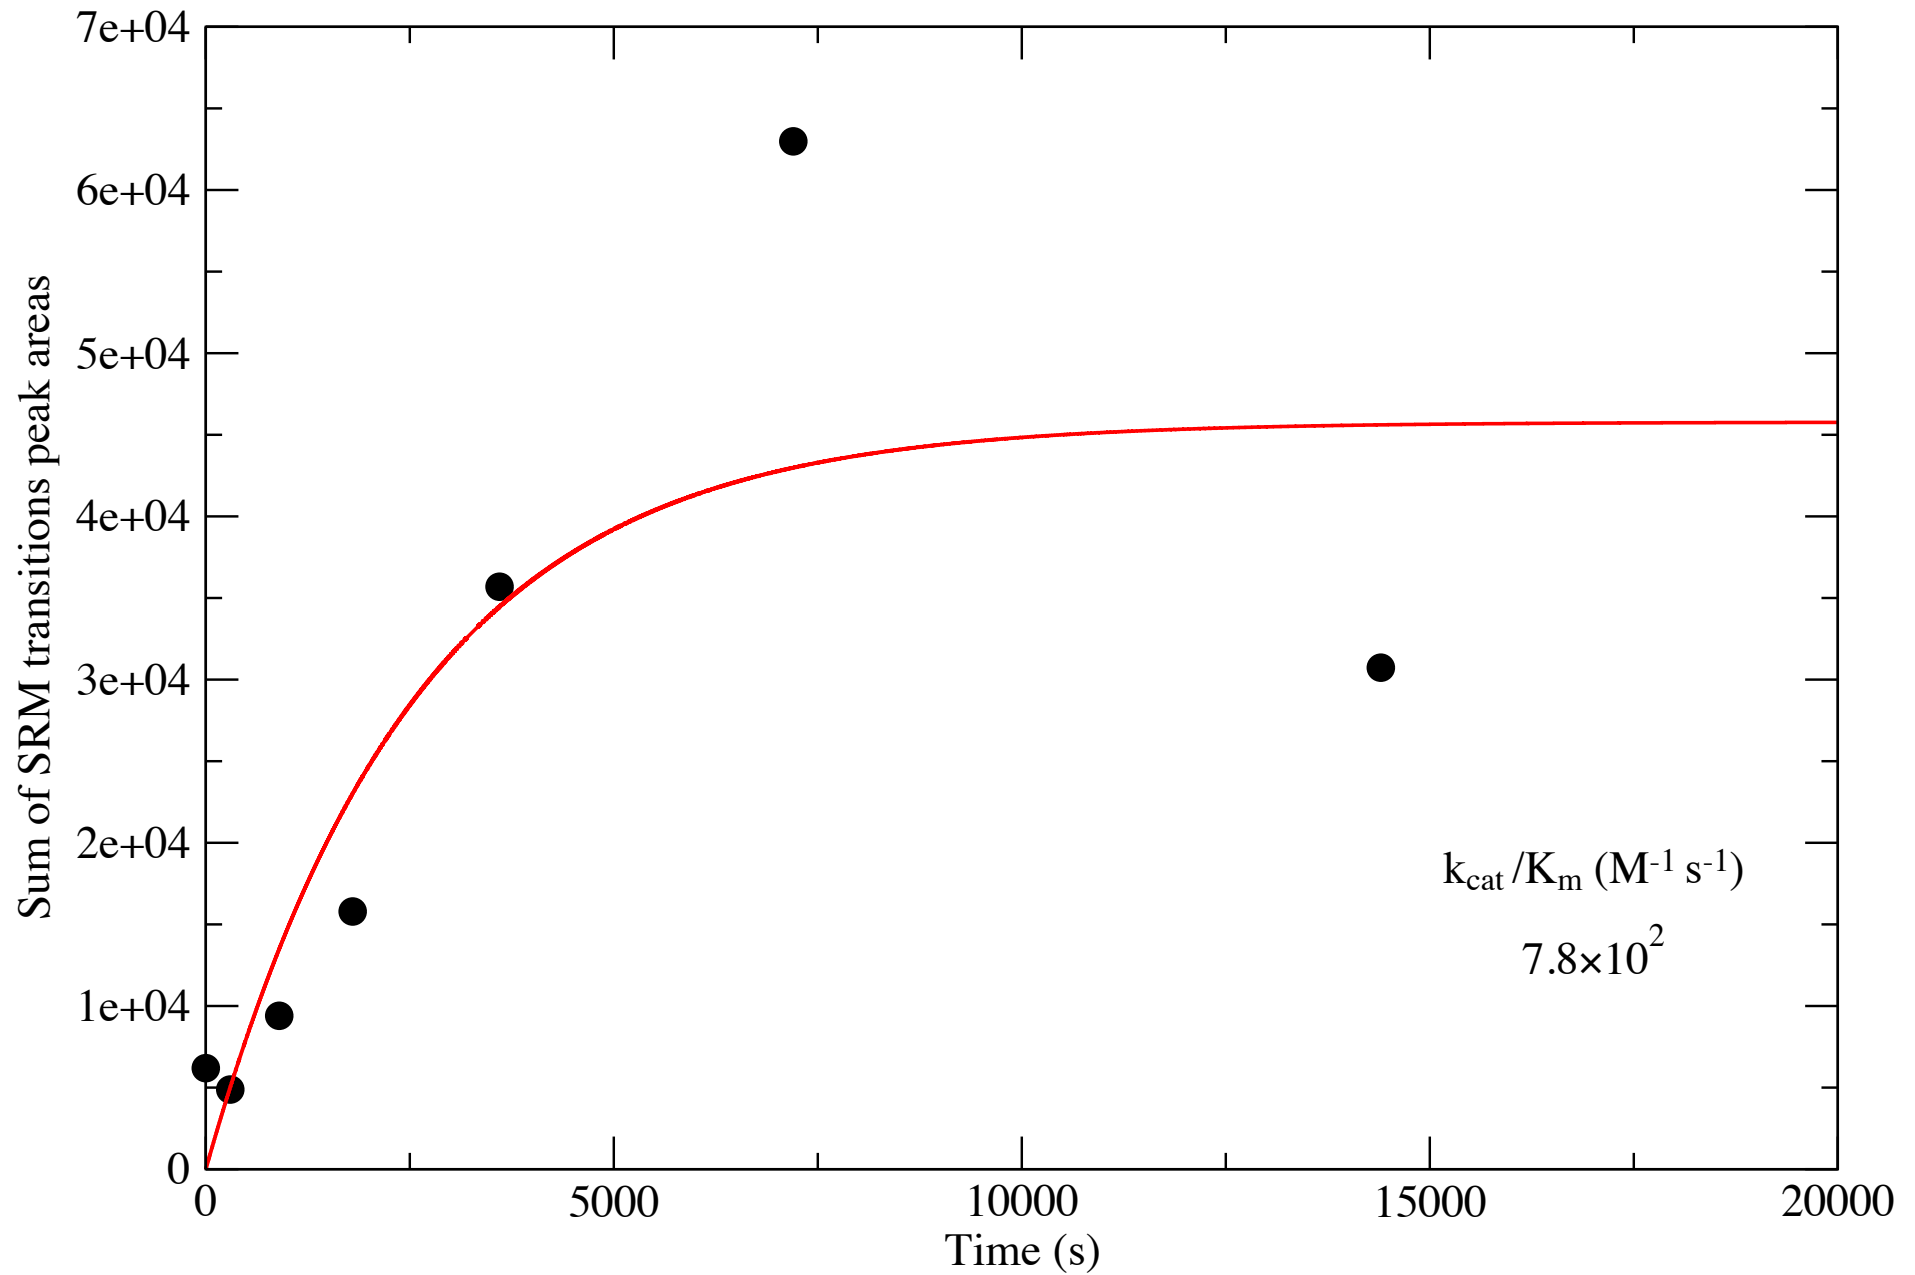

# TIF1B\_HUMAN (GADSTGVVAK)

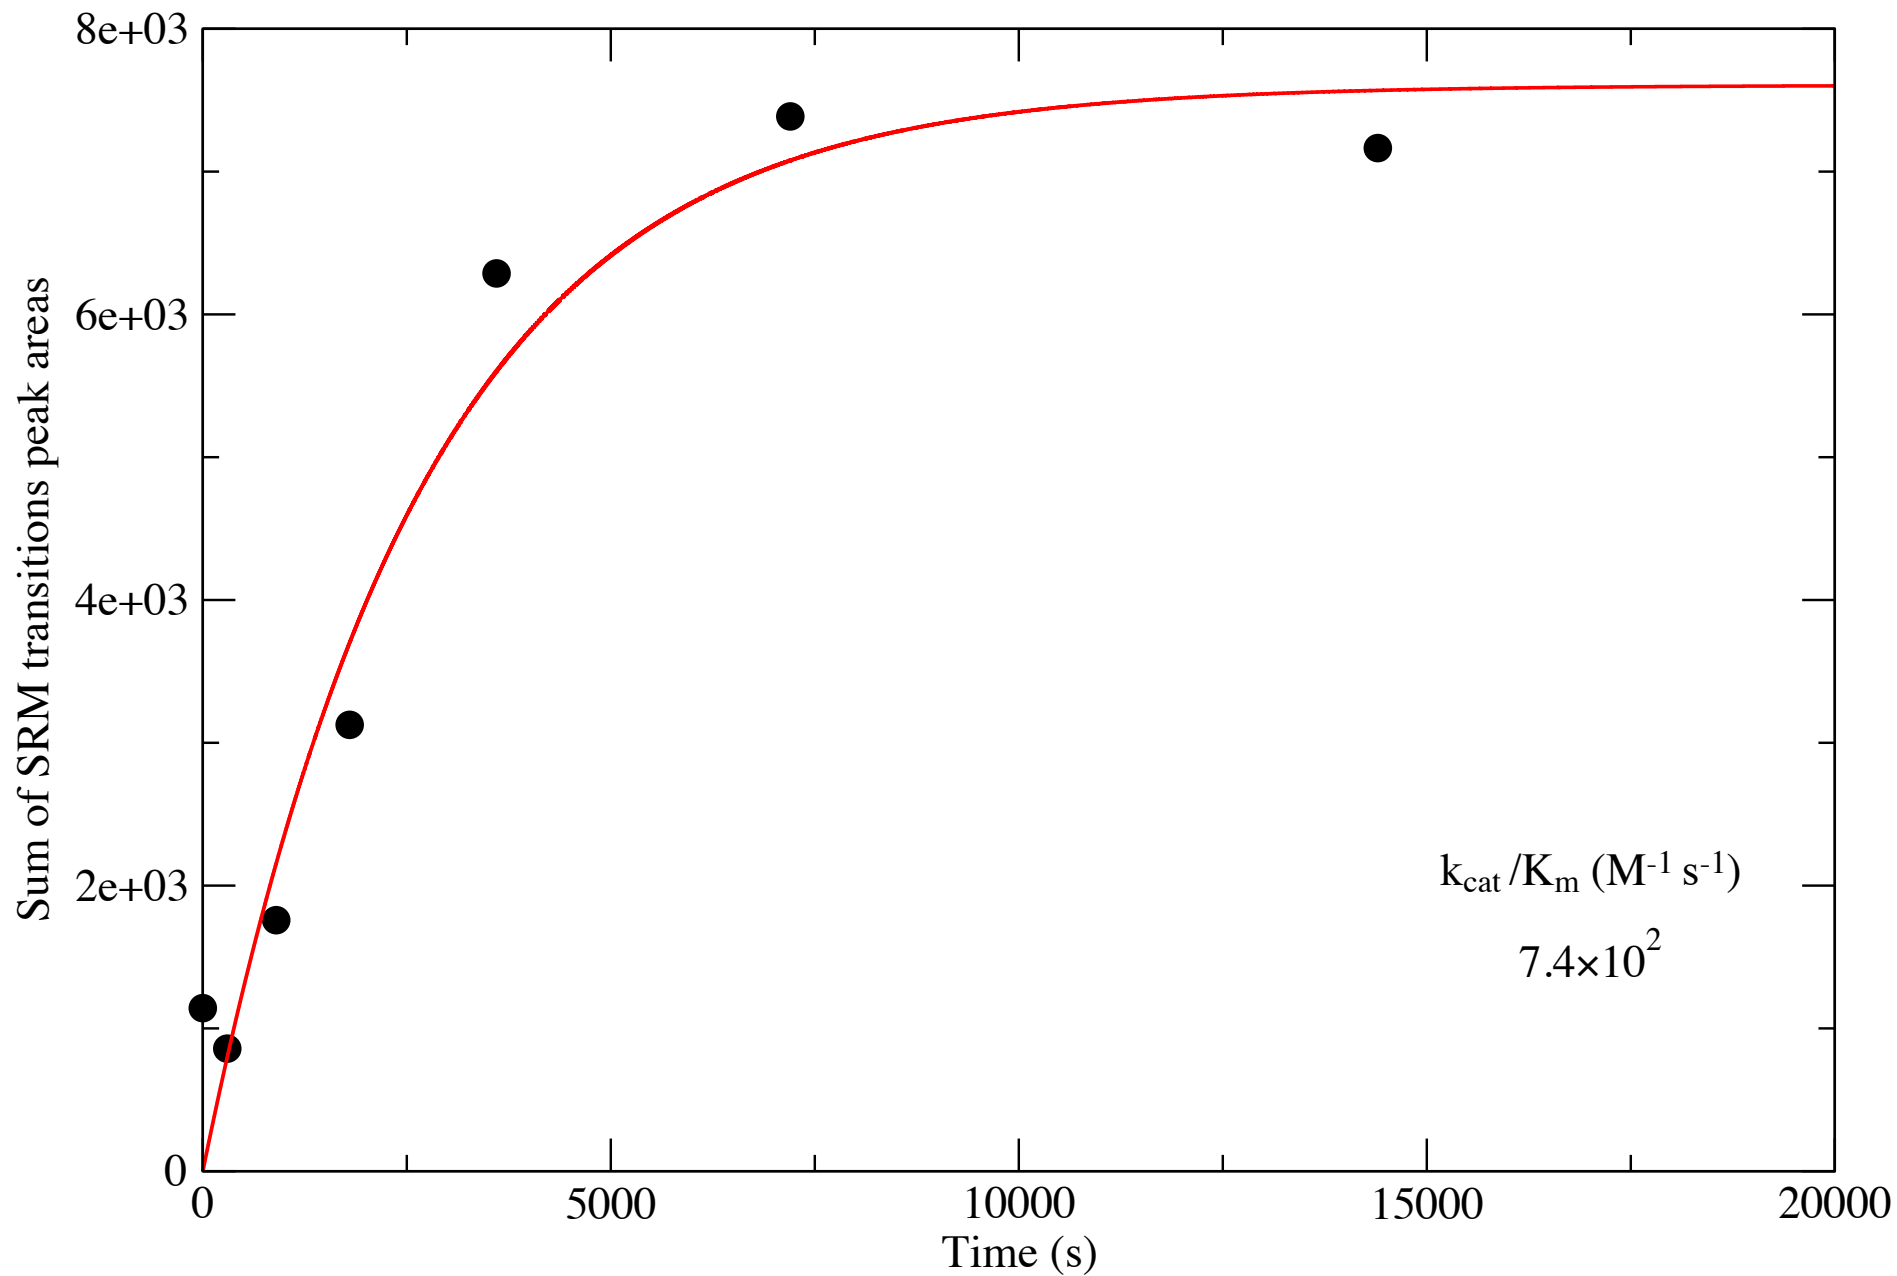

# TREF1\_HUMAN (GLGLPVGSK)

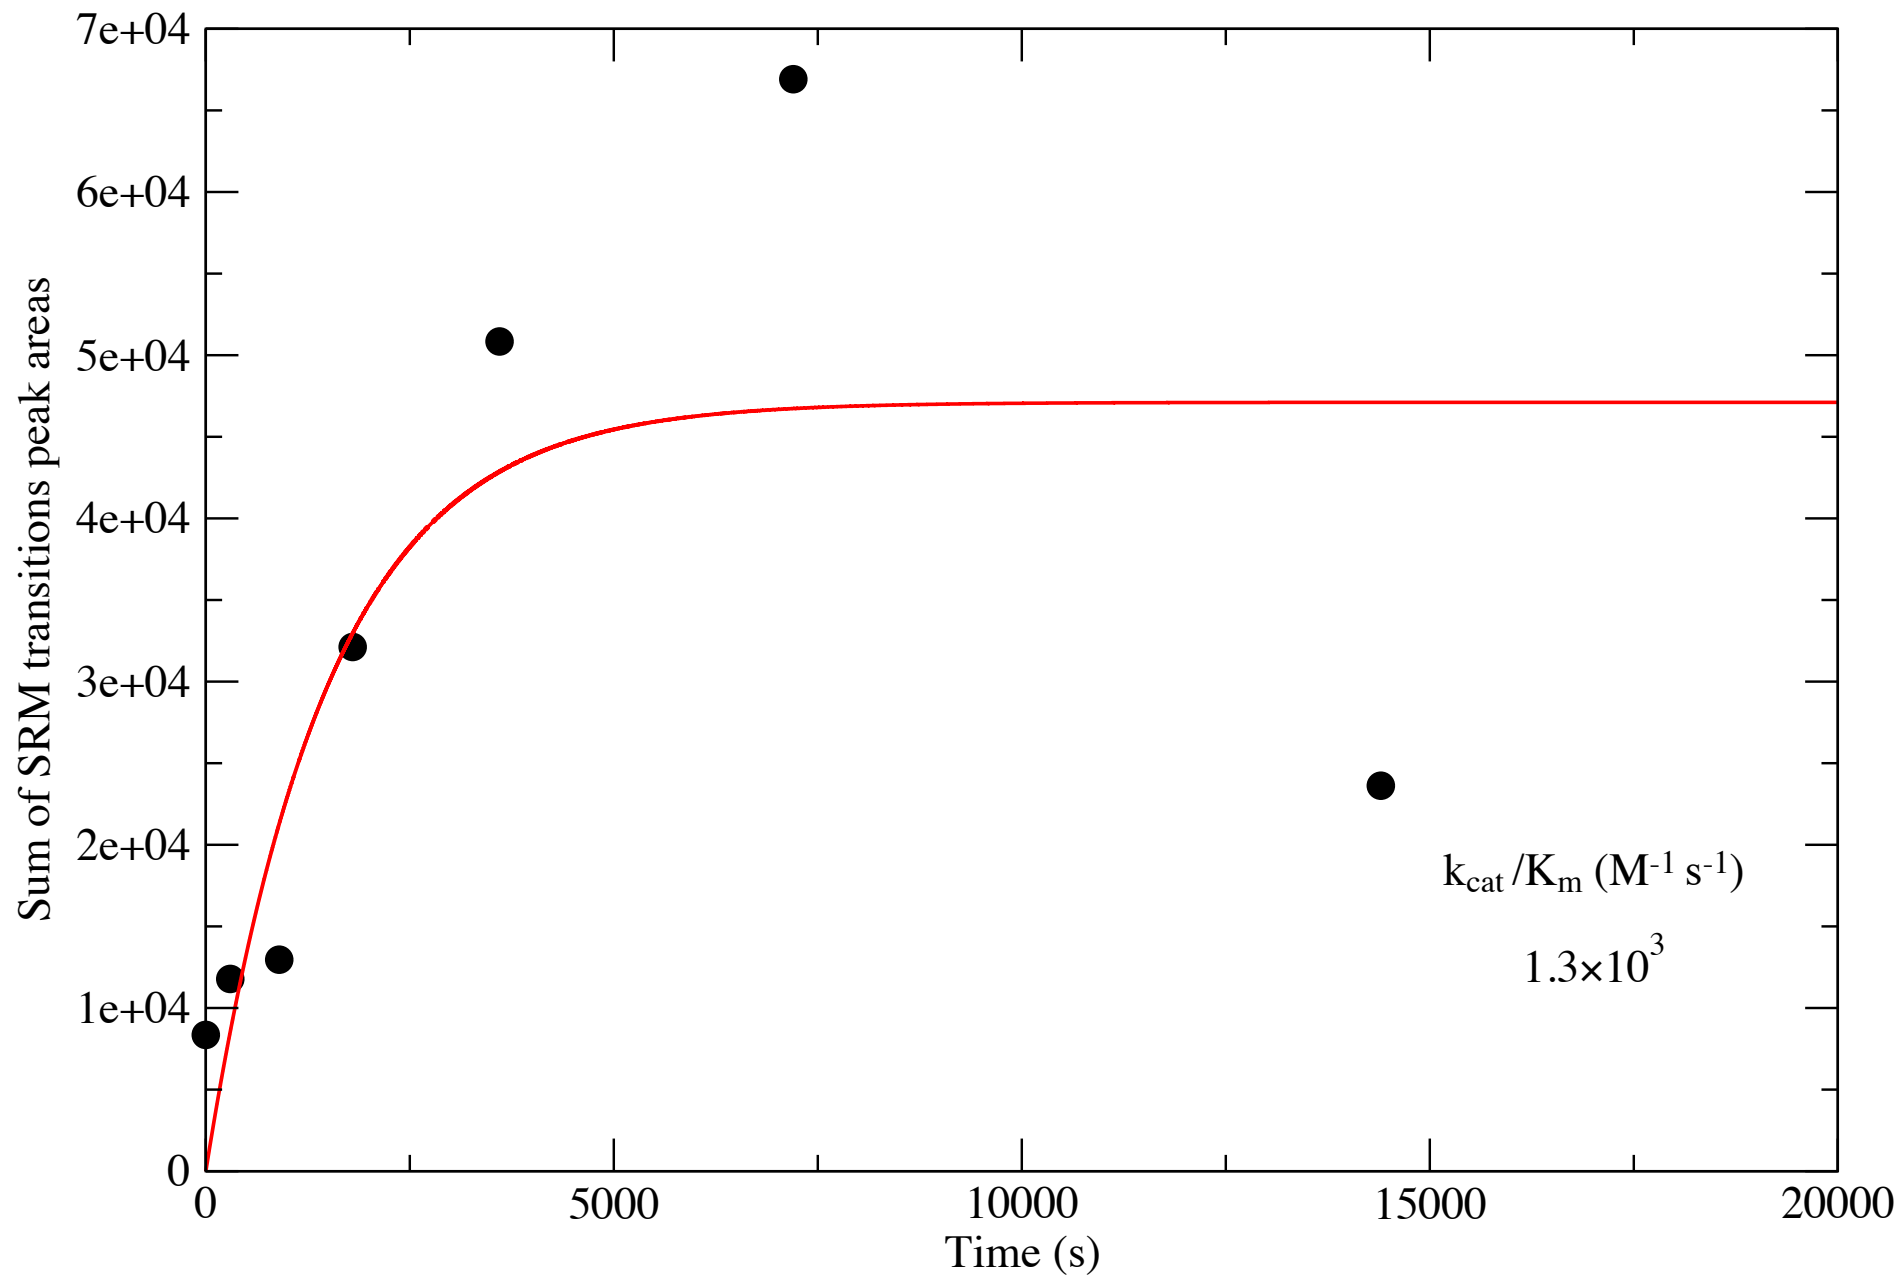

# TYB4\_HUMAN (MAEIEKFDK)

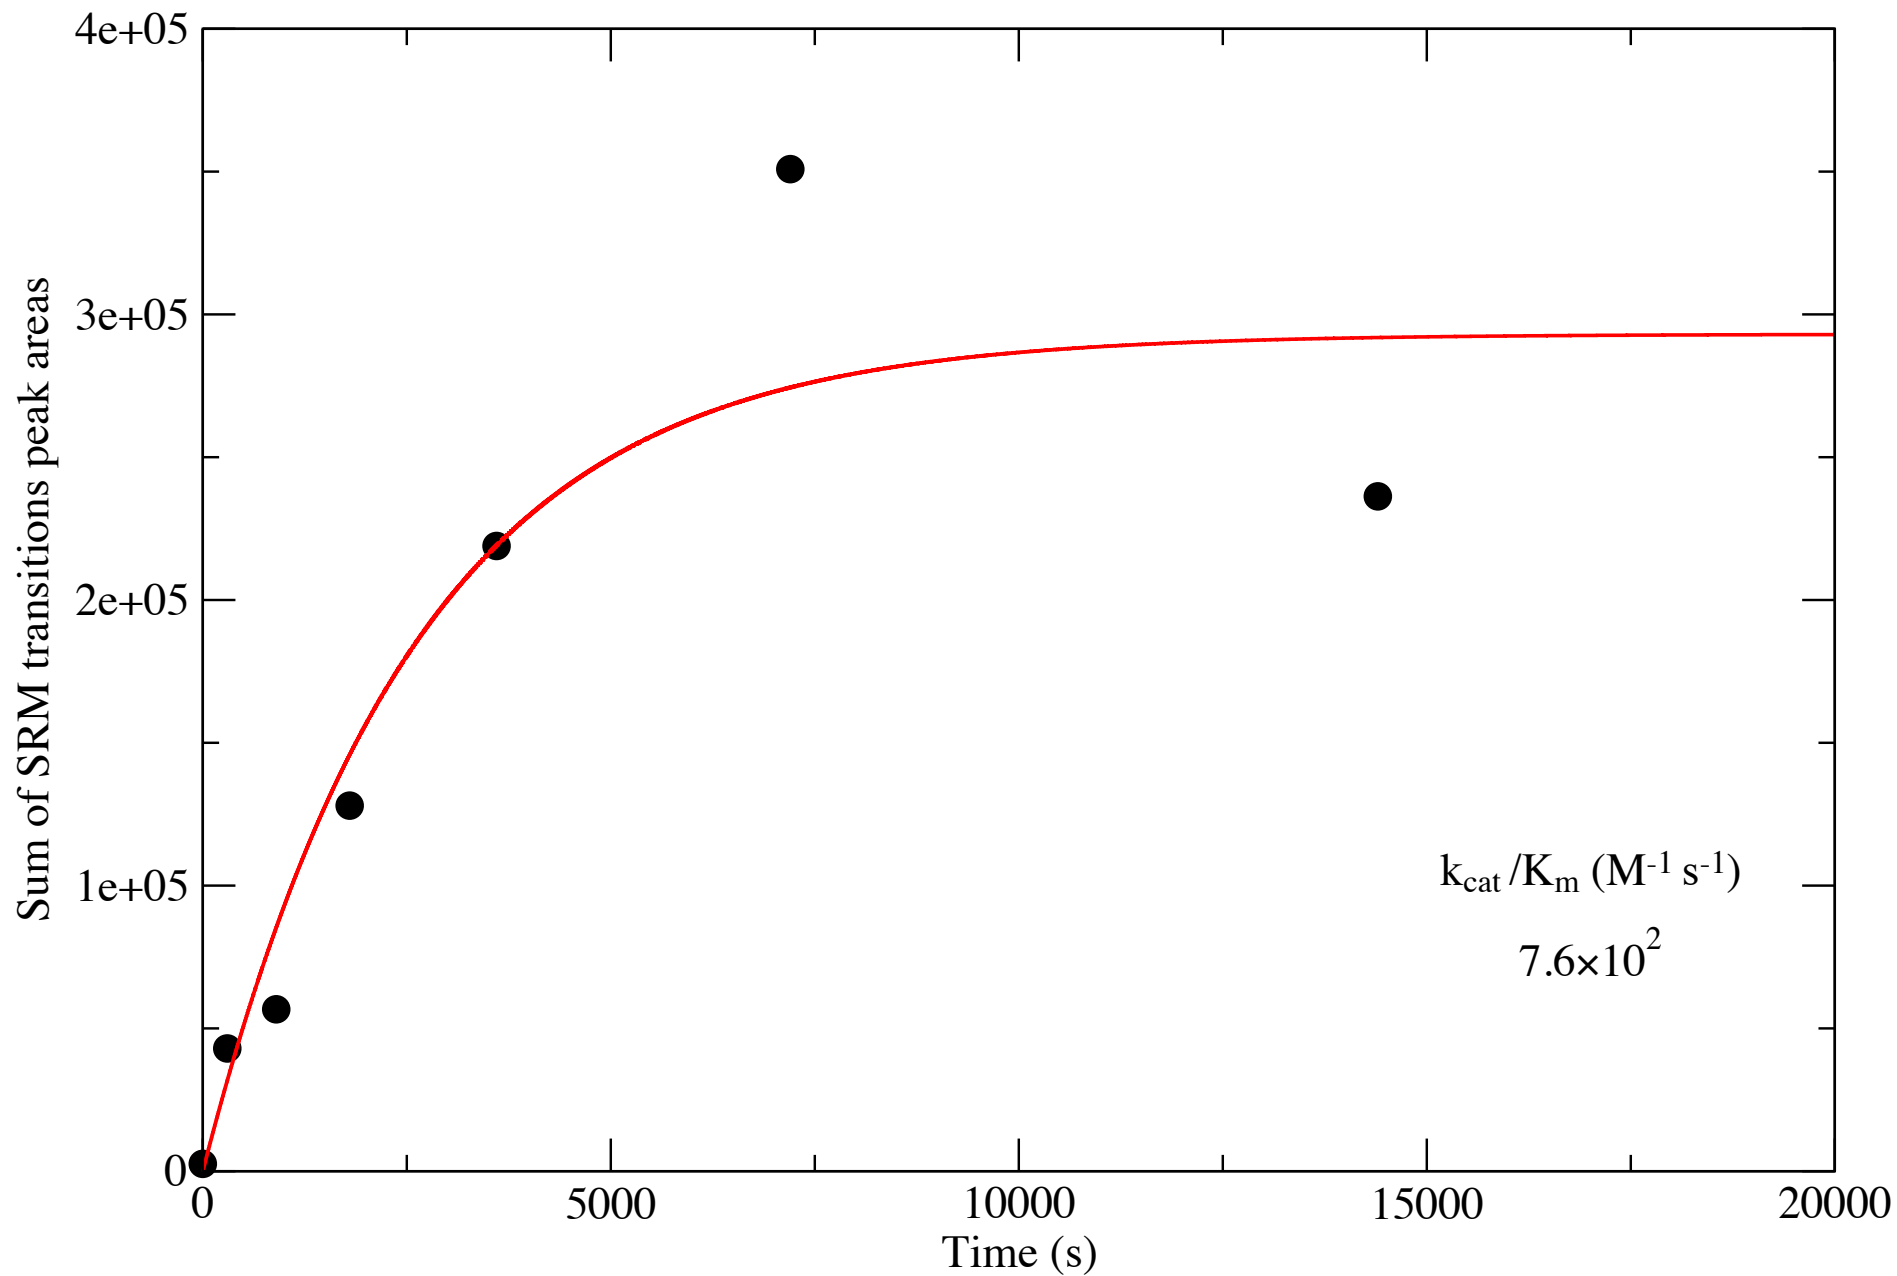

# UBN1\_HUMAN (SFIDNSEA YDELVPASLTK)

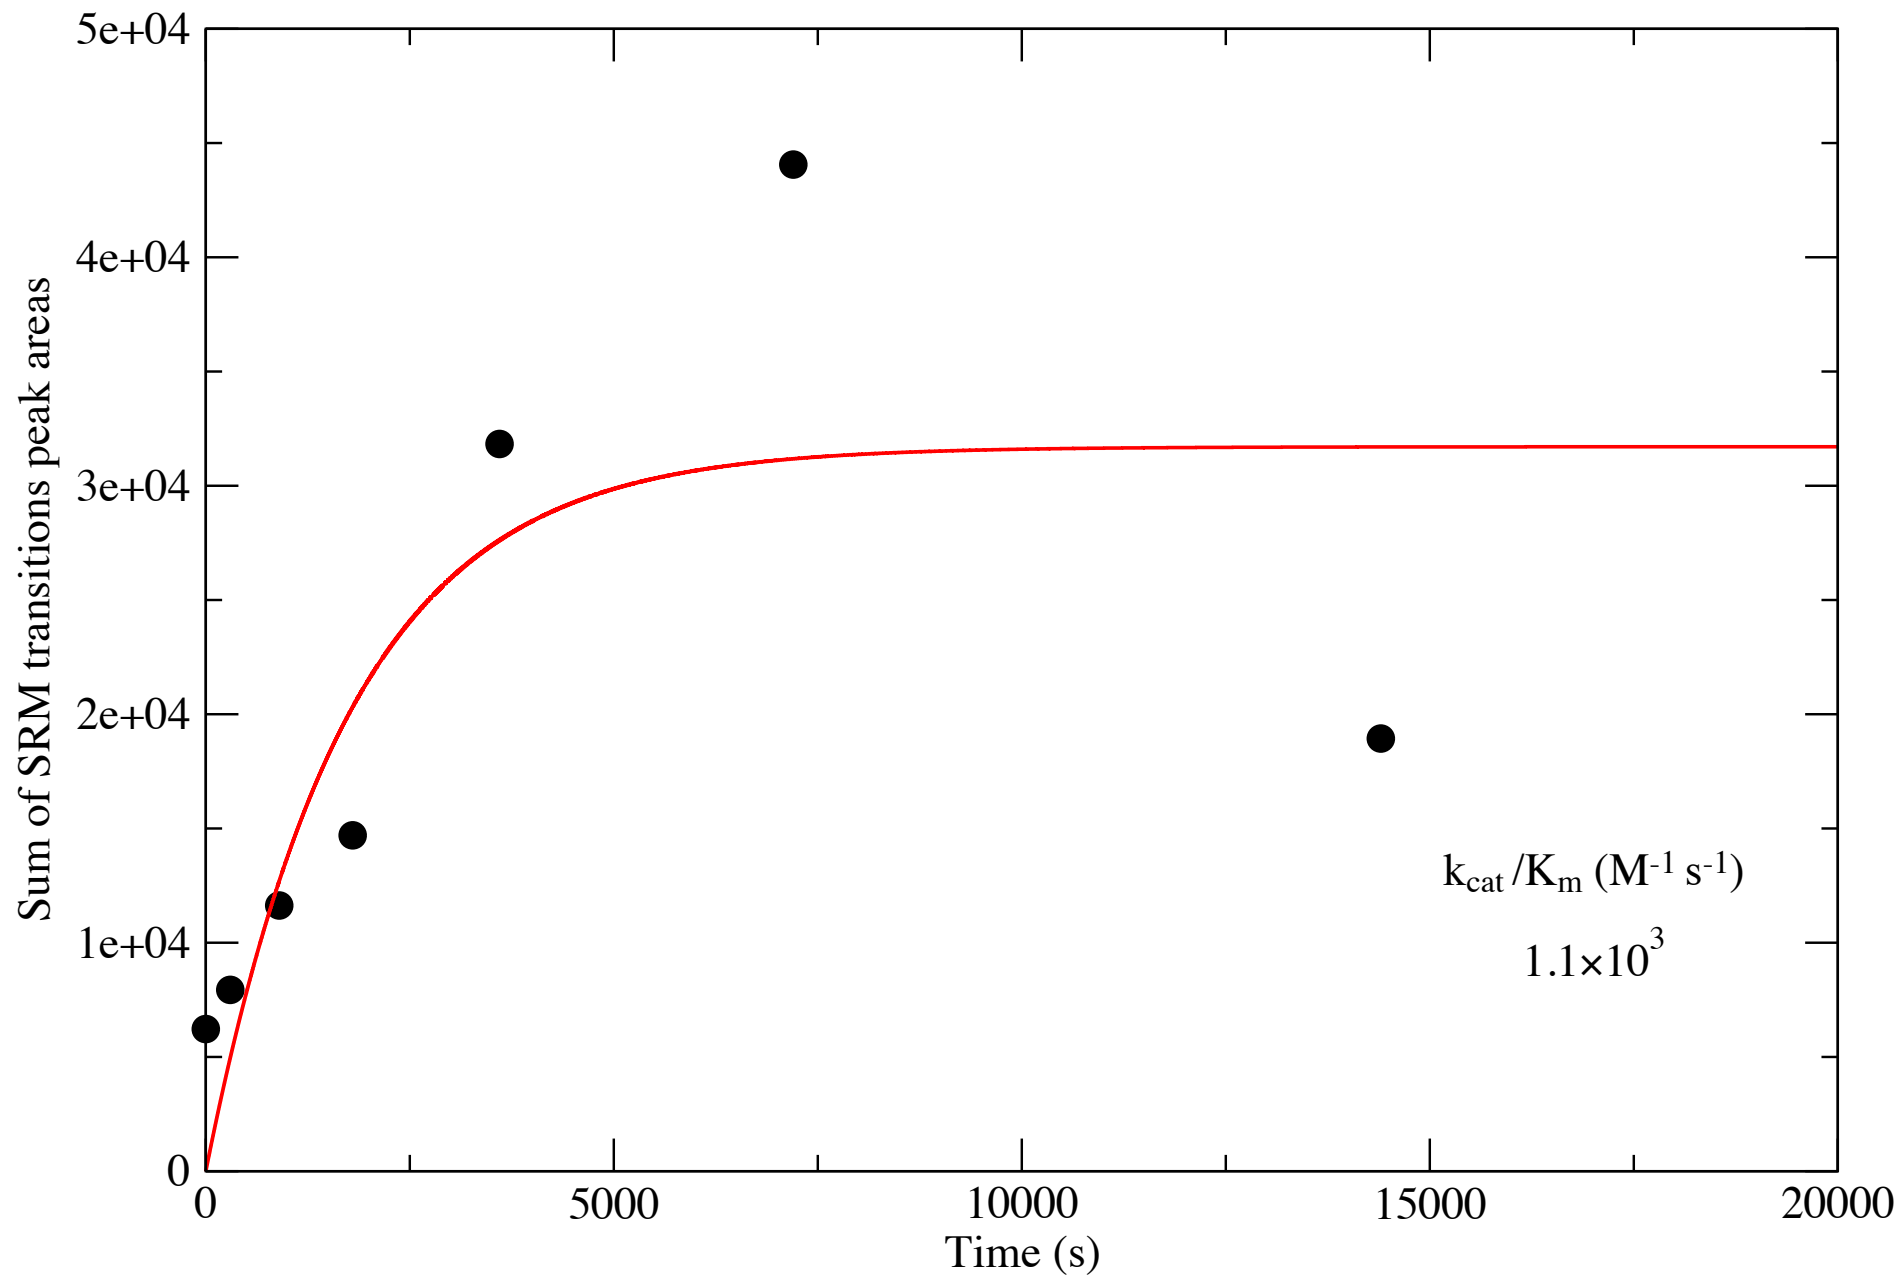

# UBP10\_HUMAN (GVSGGLGQR)

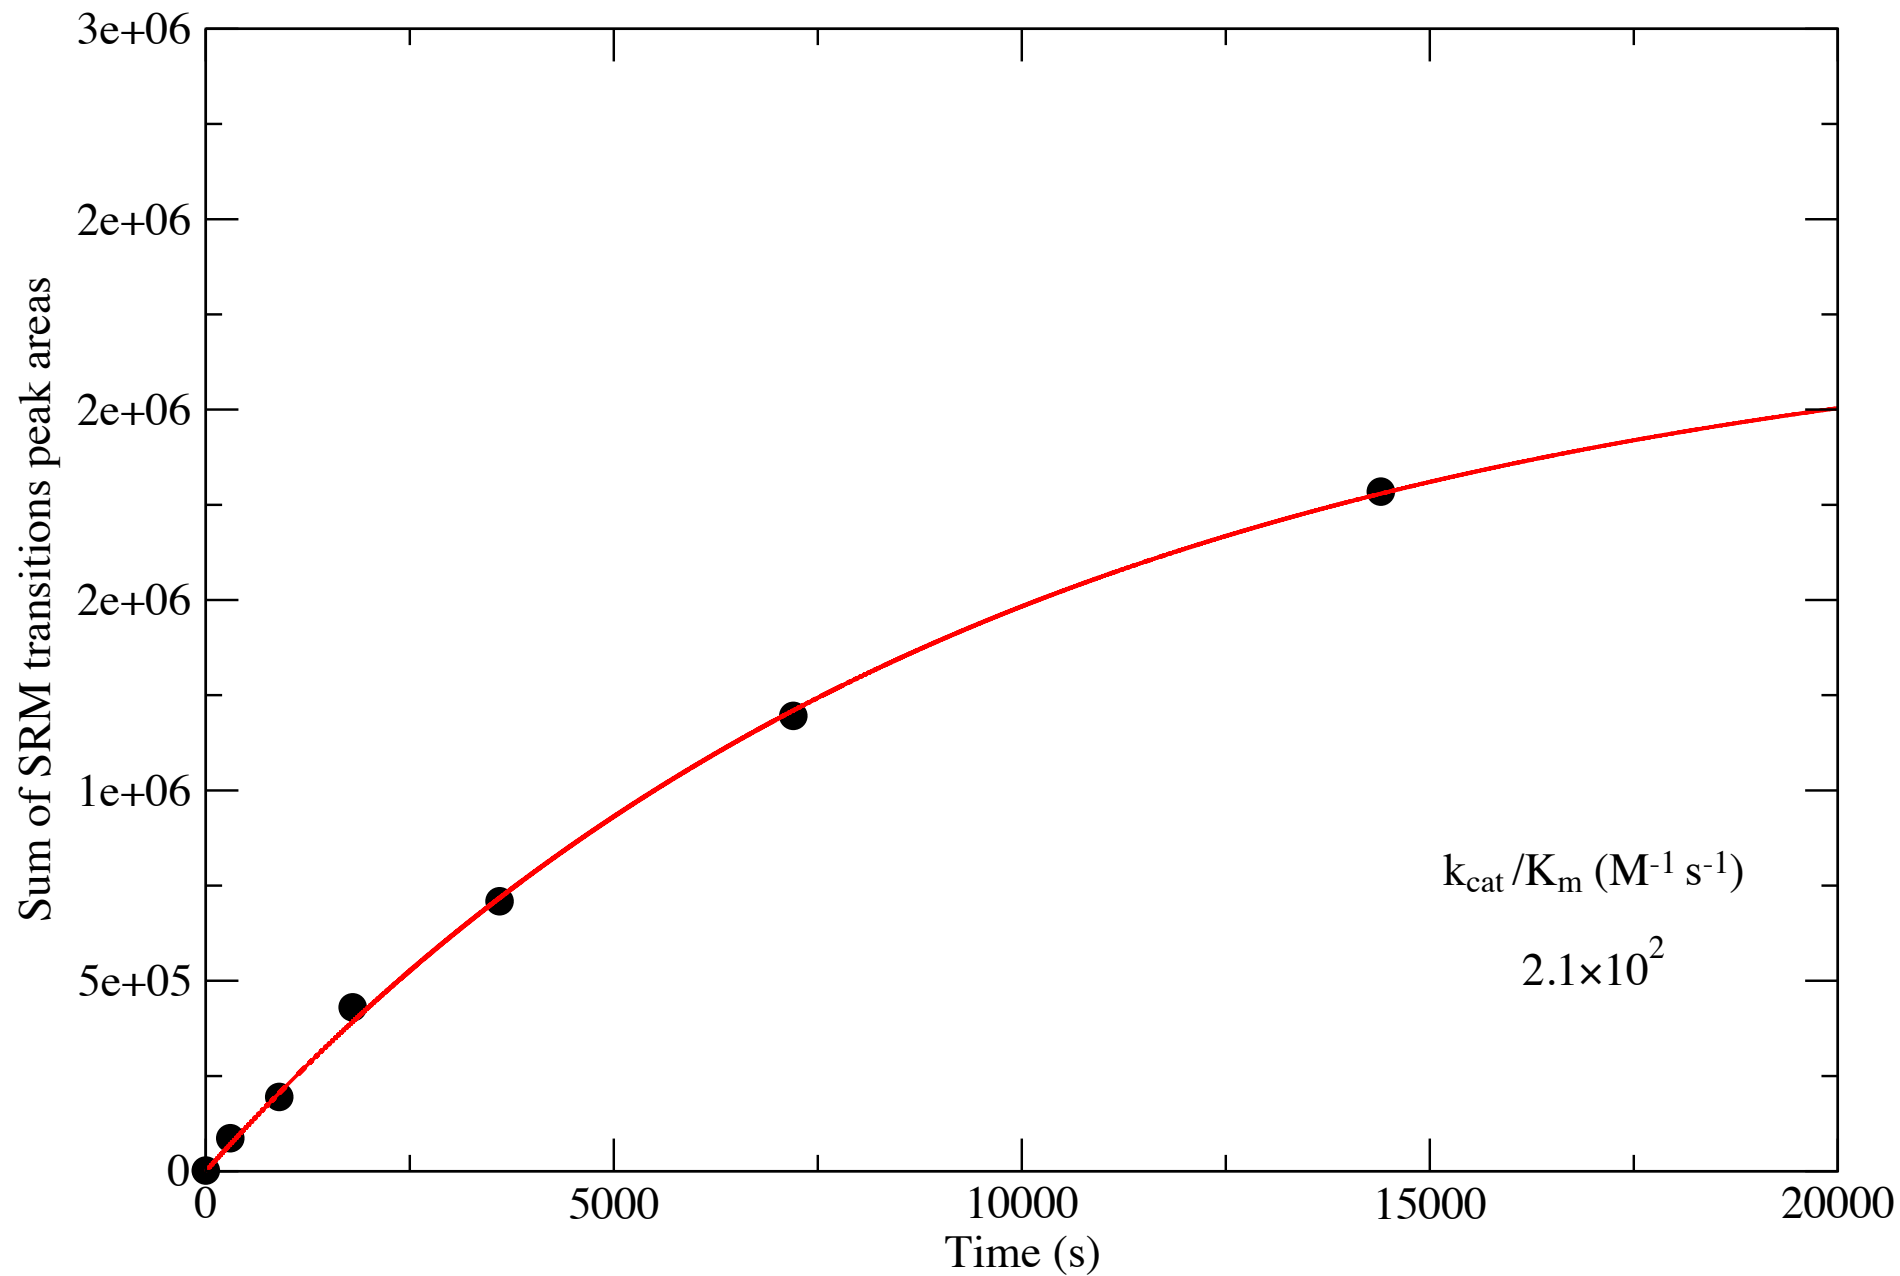

# VCIP1\_HUMAN (GCVADALGAAAFATR)

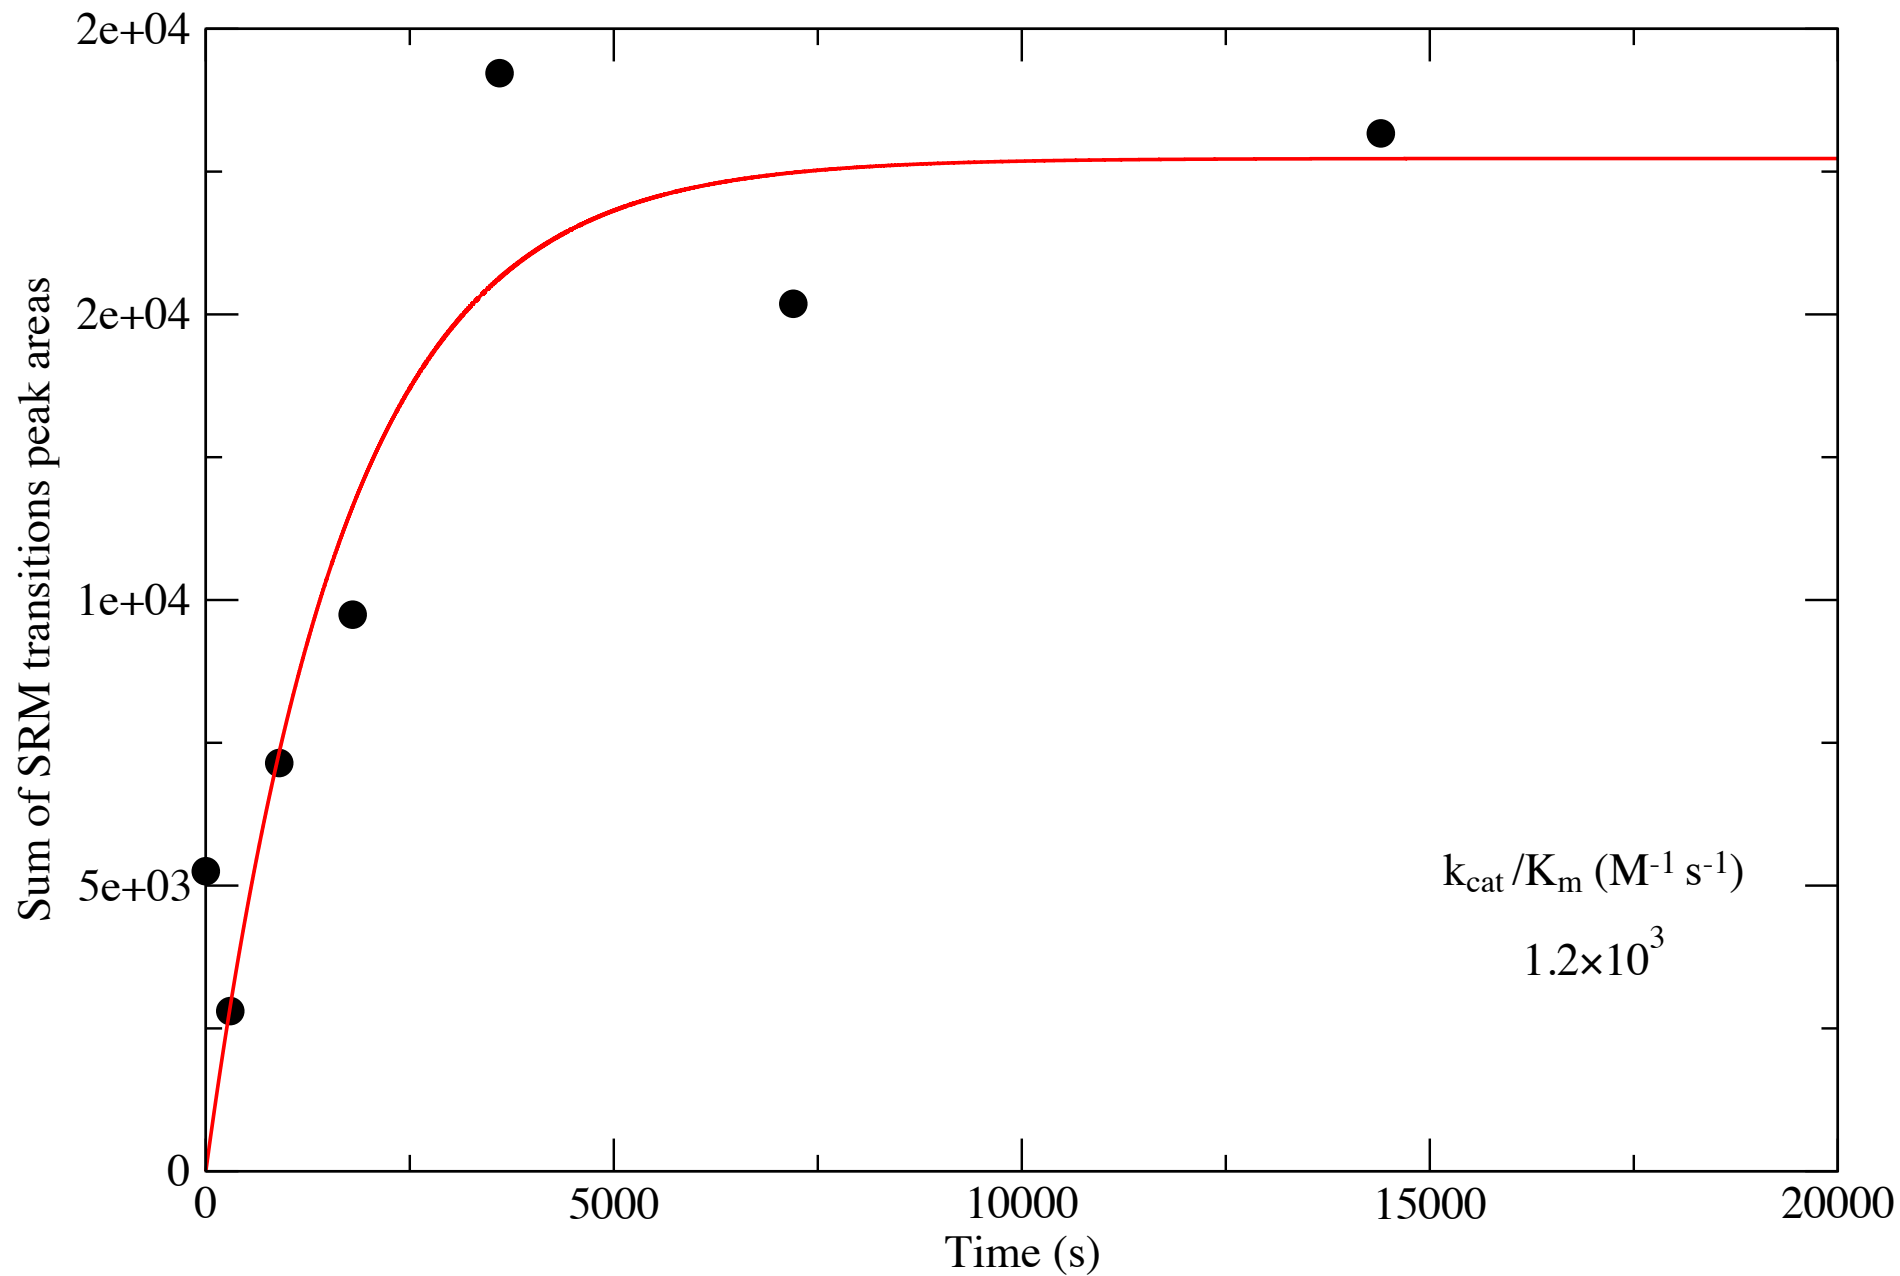

# YBOX3\_HUMAN (GVPVEGSR)

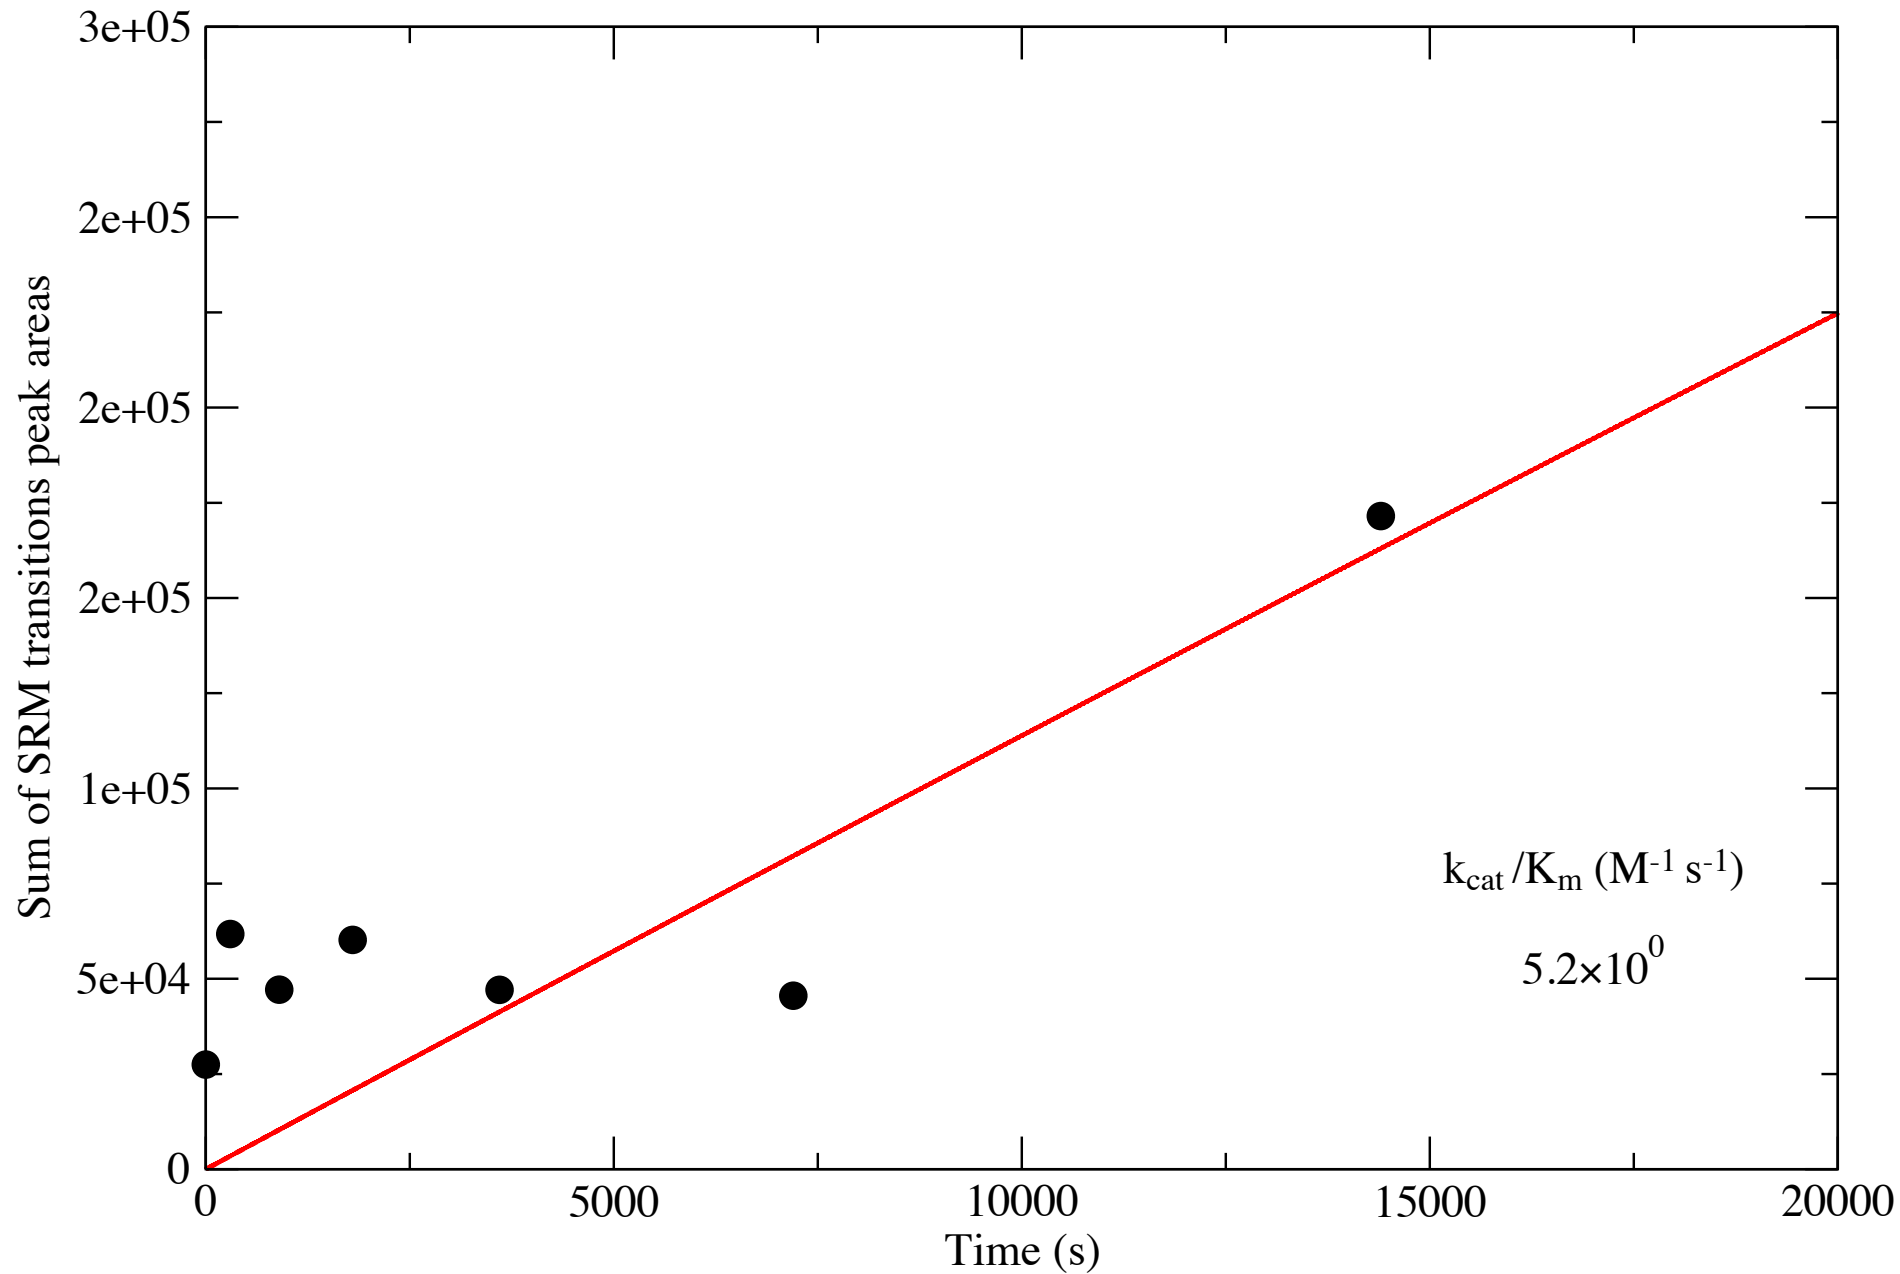



# ZAP70\_HUMAN (GYTPEPAR)

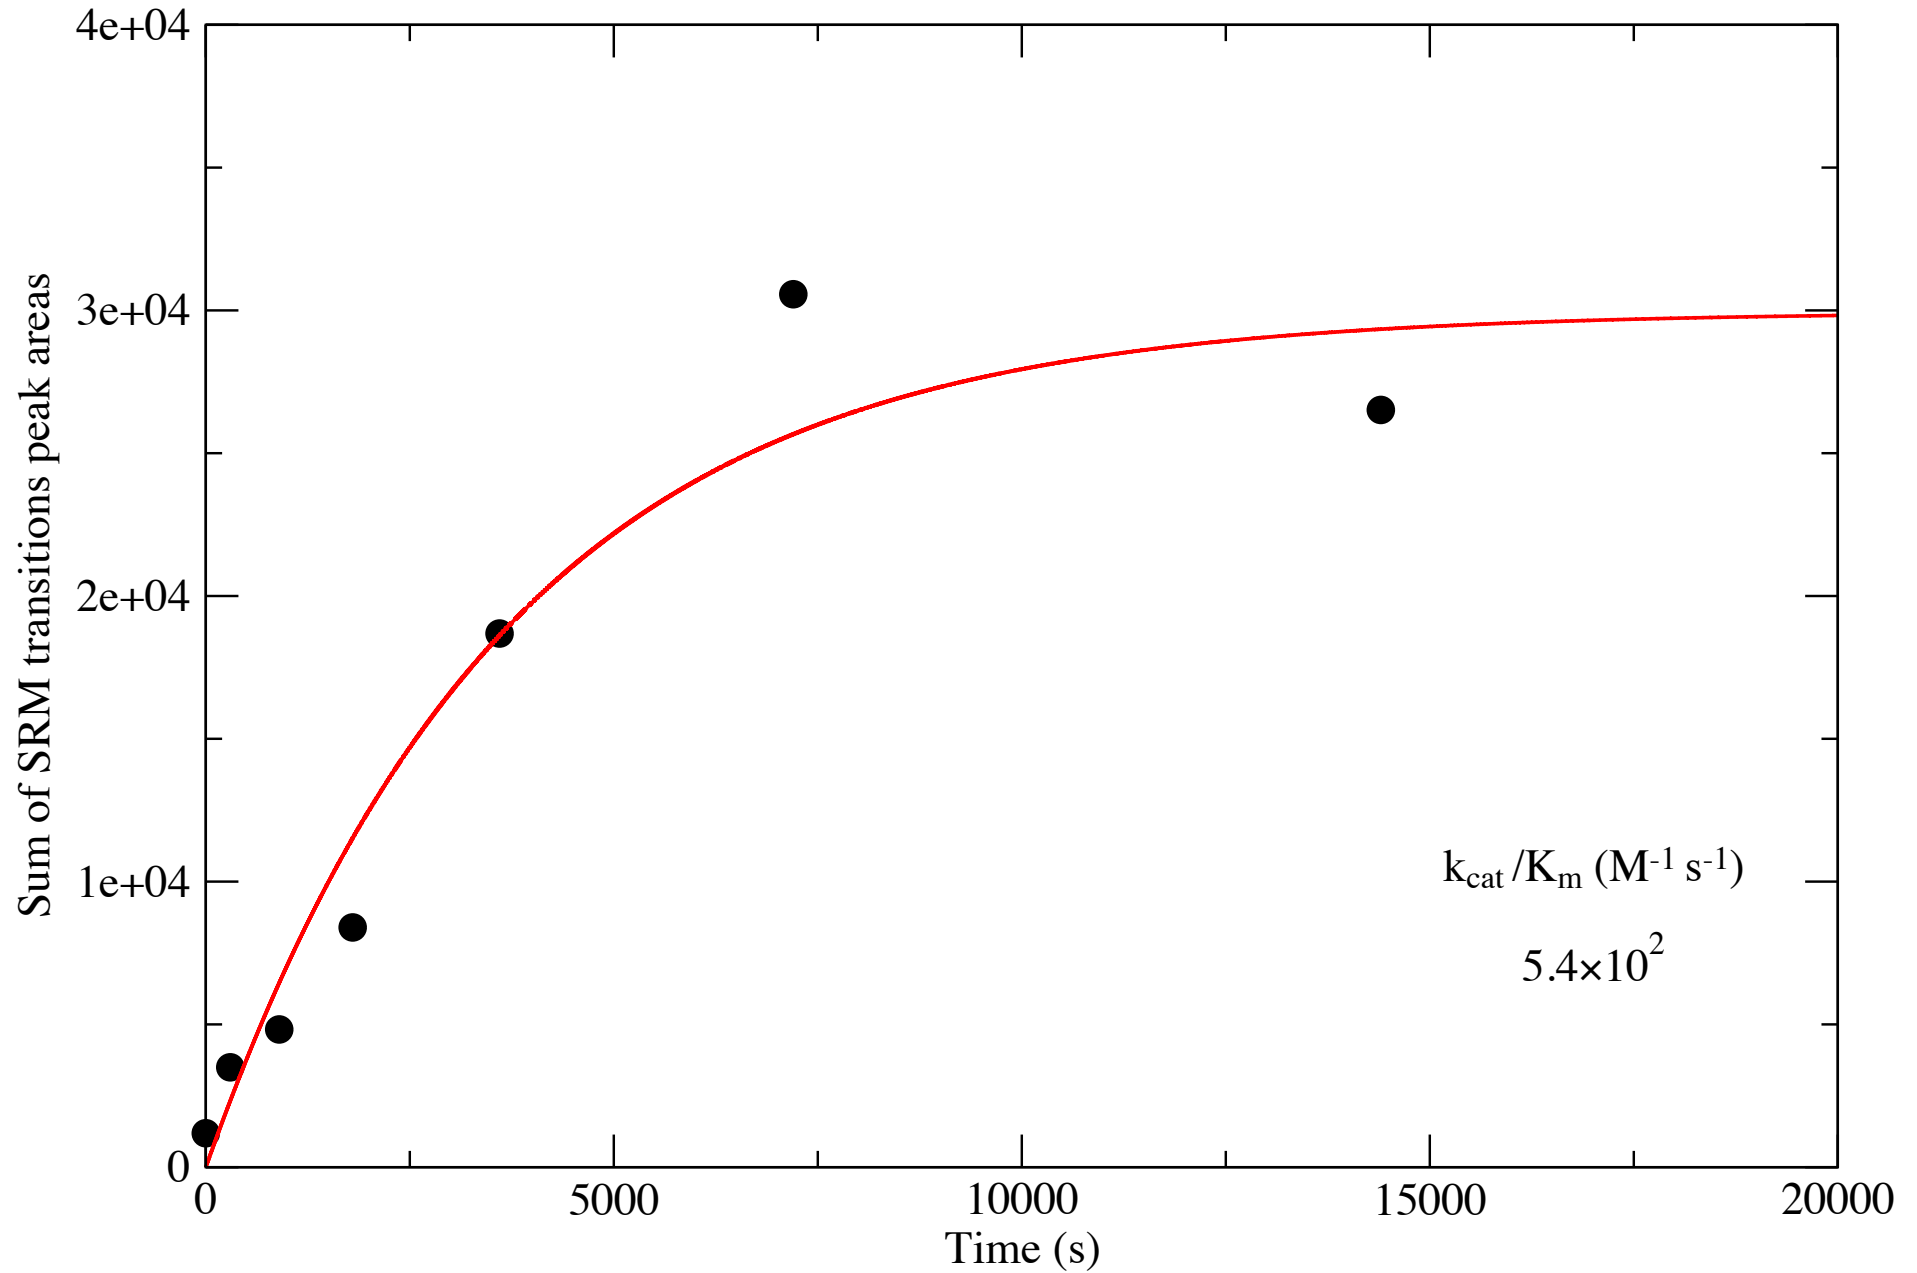

Supplement: pnas.1524900113.sd05.pdf [file pnas.1524900113.sd05.pdf]
