# Supplementary material
Source: PubMed Central journal article supplement (PMC4833263)

# AGGF1\_HUMAN (AYPGTDRRTENVKYR)

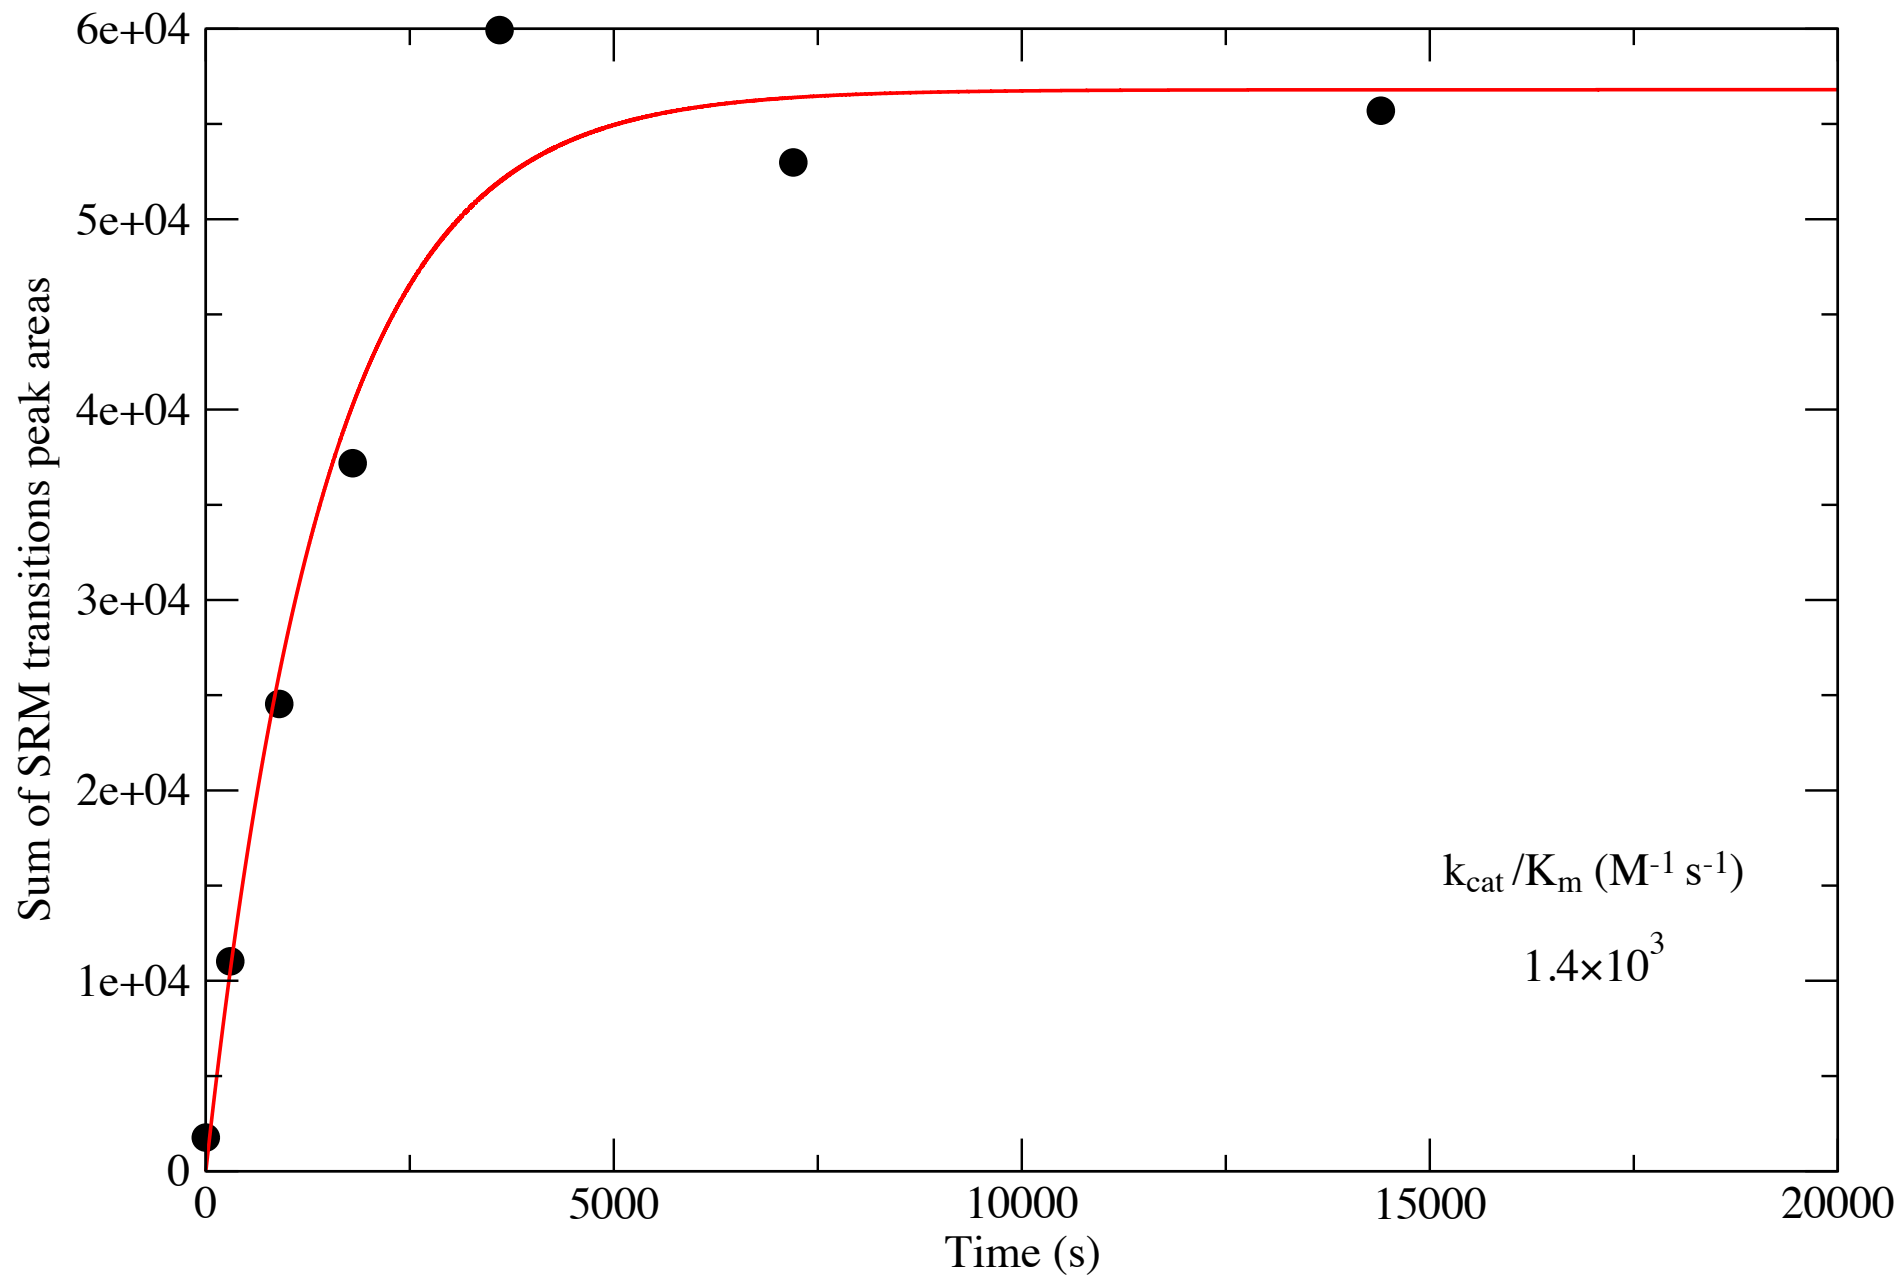

# AKNA\_HUMAN (GVAATPGKAEATR)

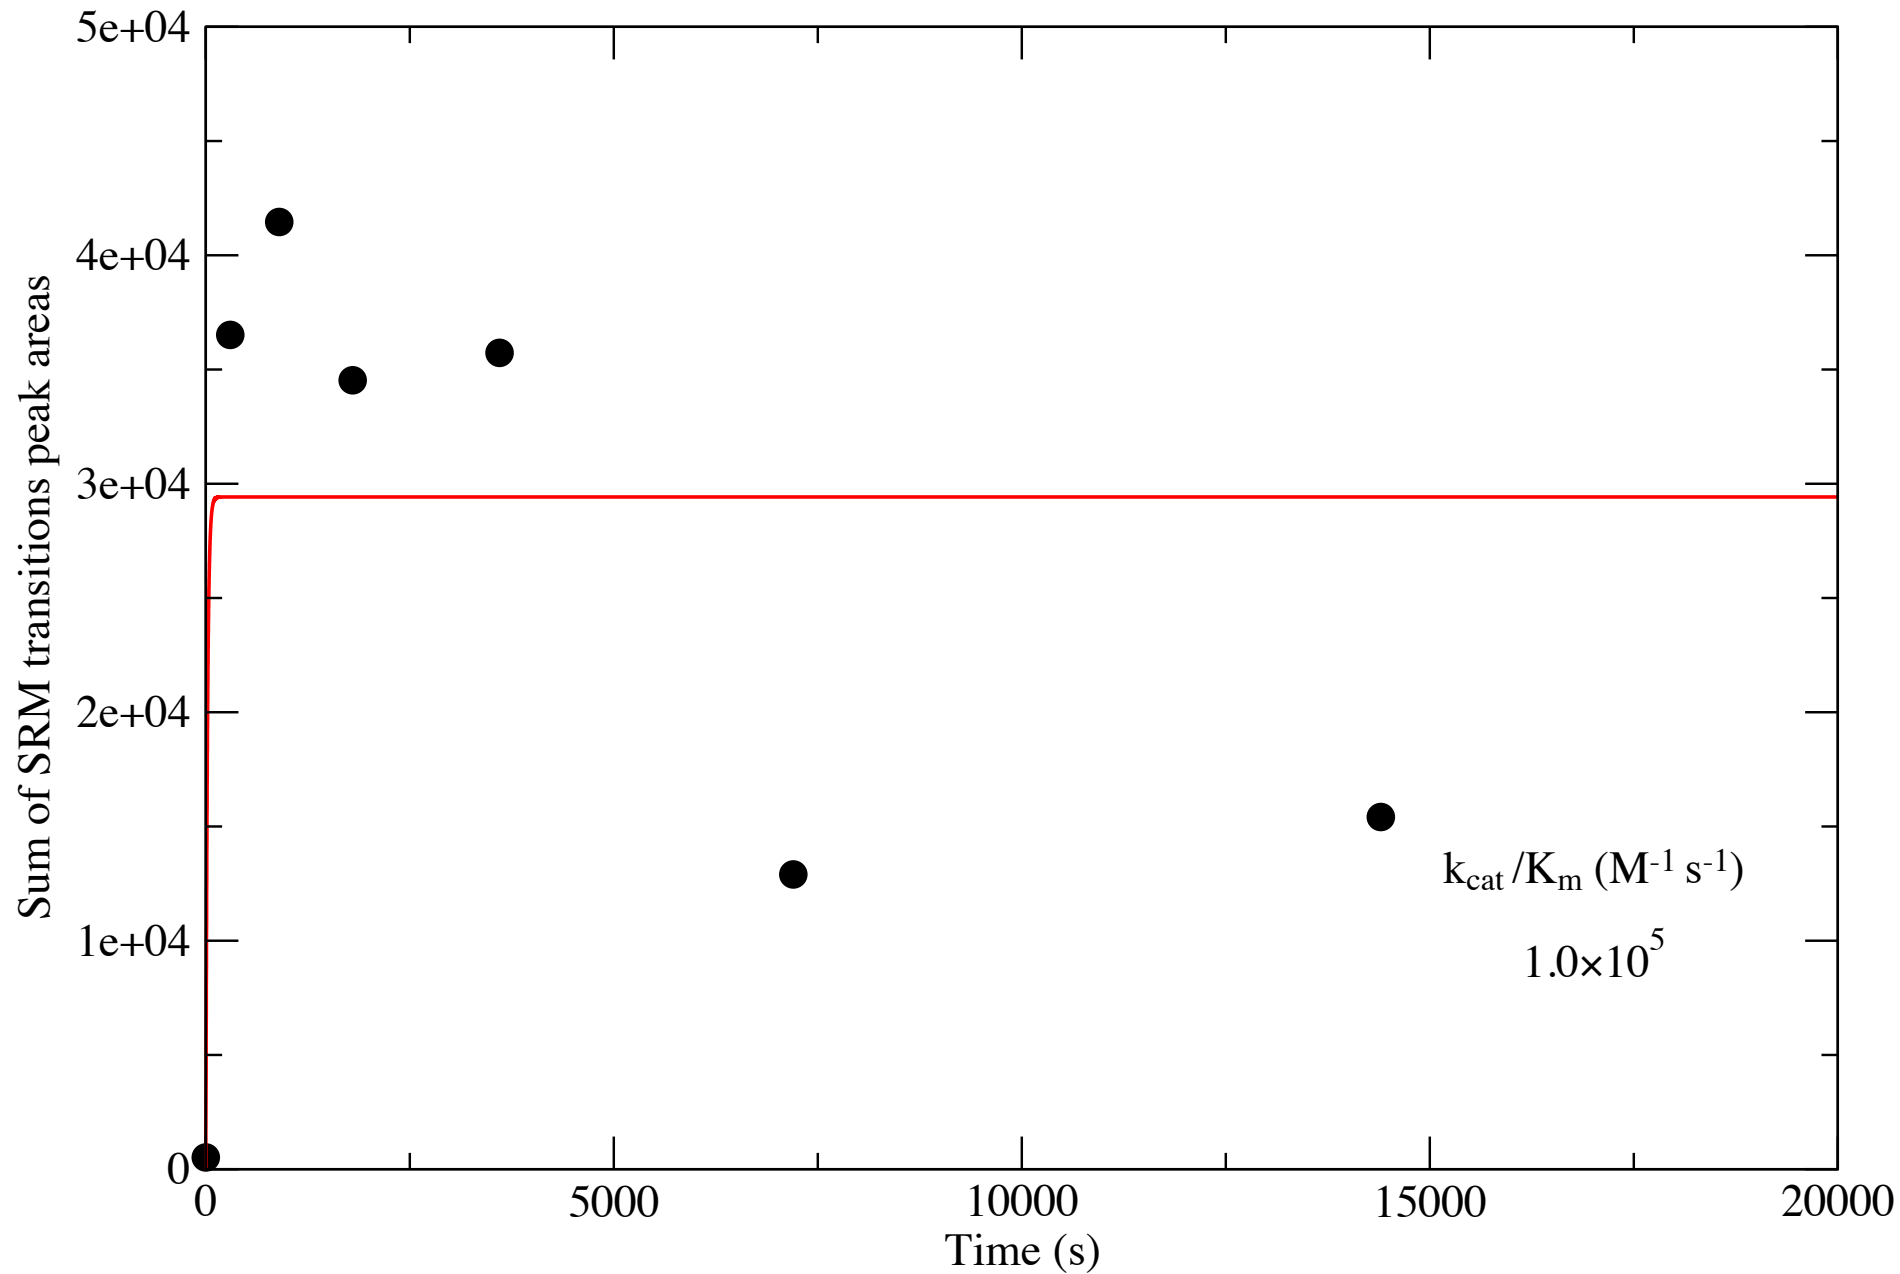

# AKP13\_HUMAN (SITEVPANCSVLR)

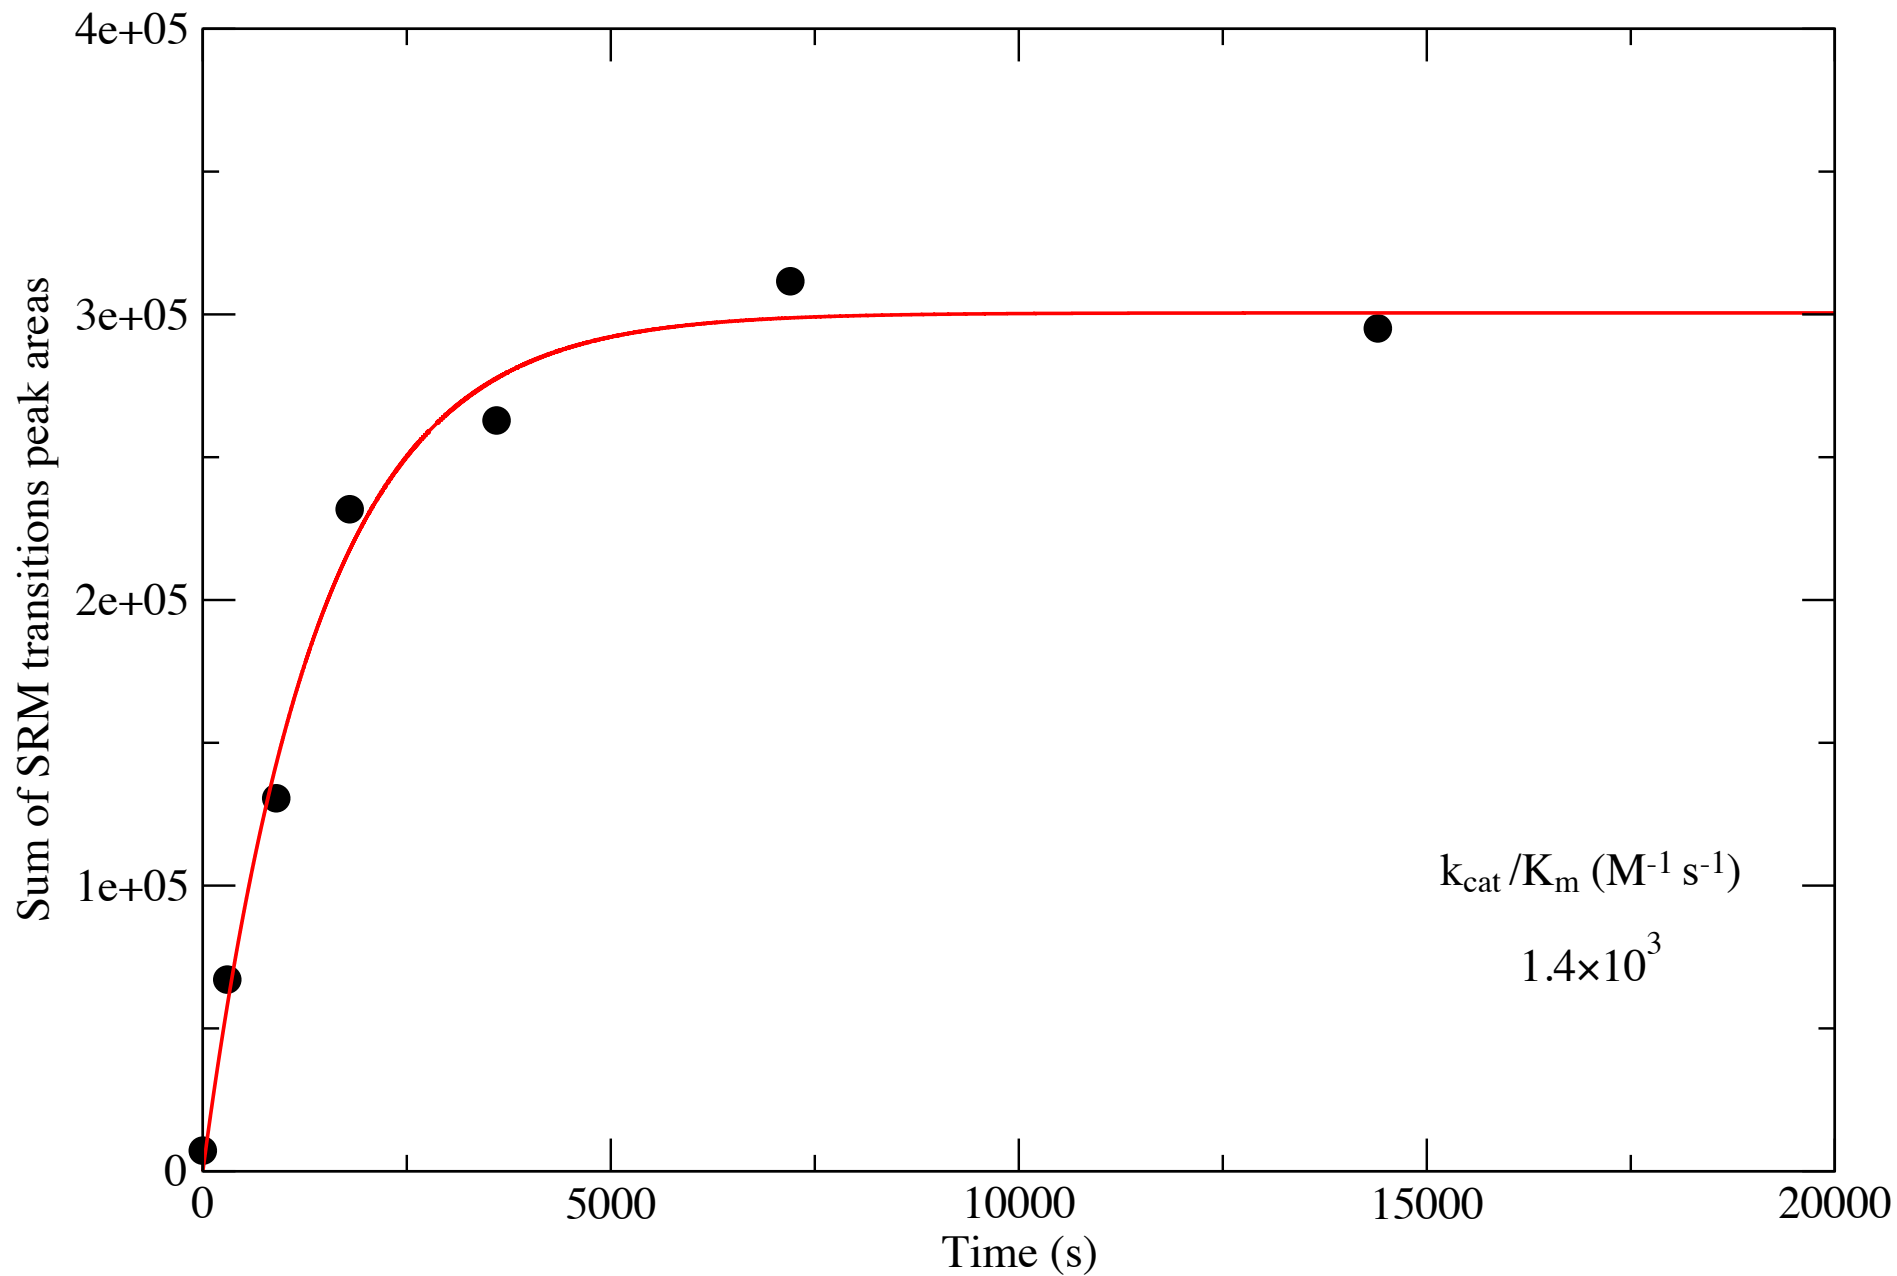

# ANR12\_HUMAN (SLICESK)

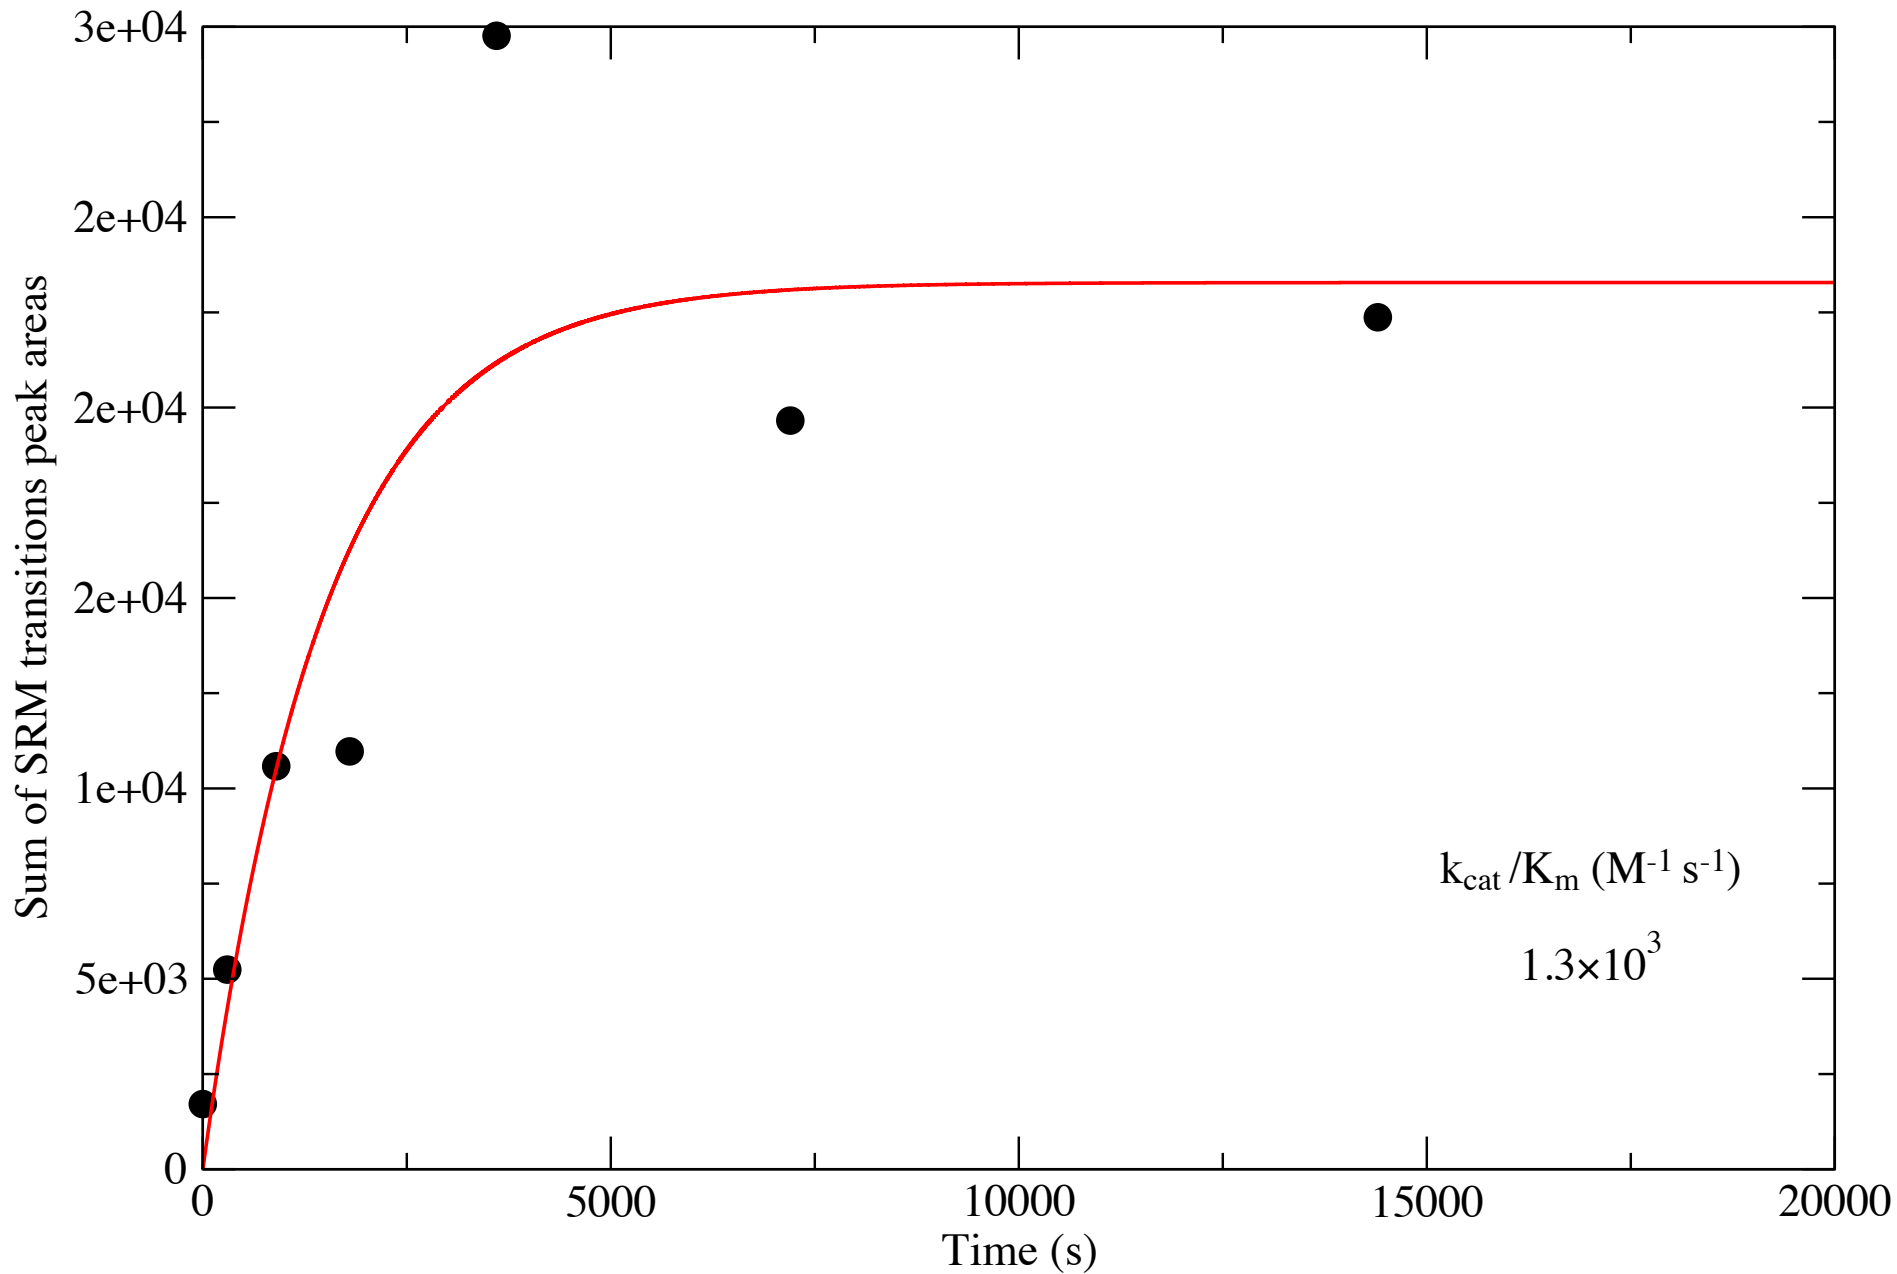



# AP2A2\_HUMAN (SASVVAPLAPGSEDNFAR)

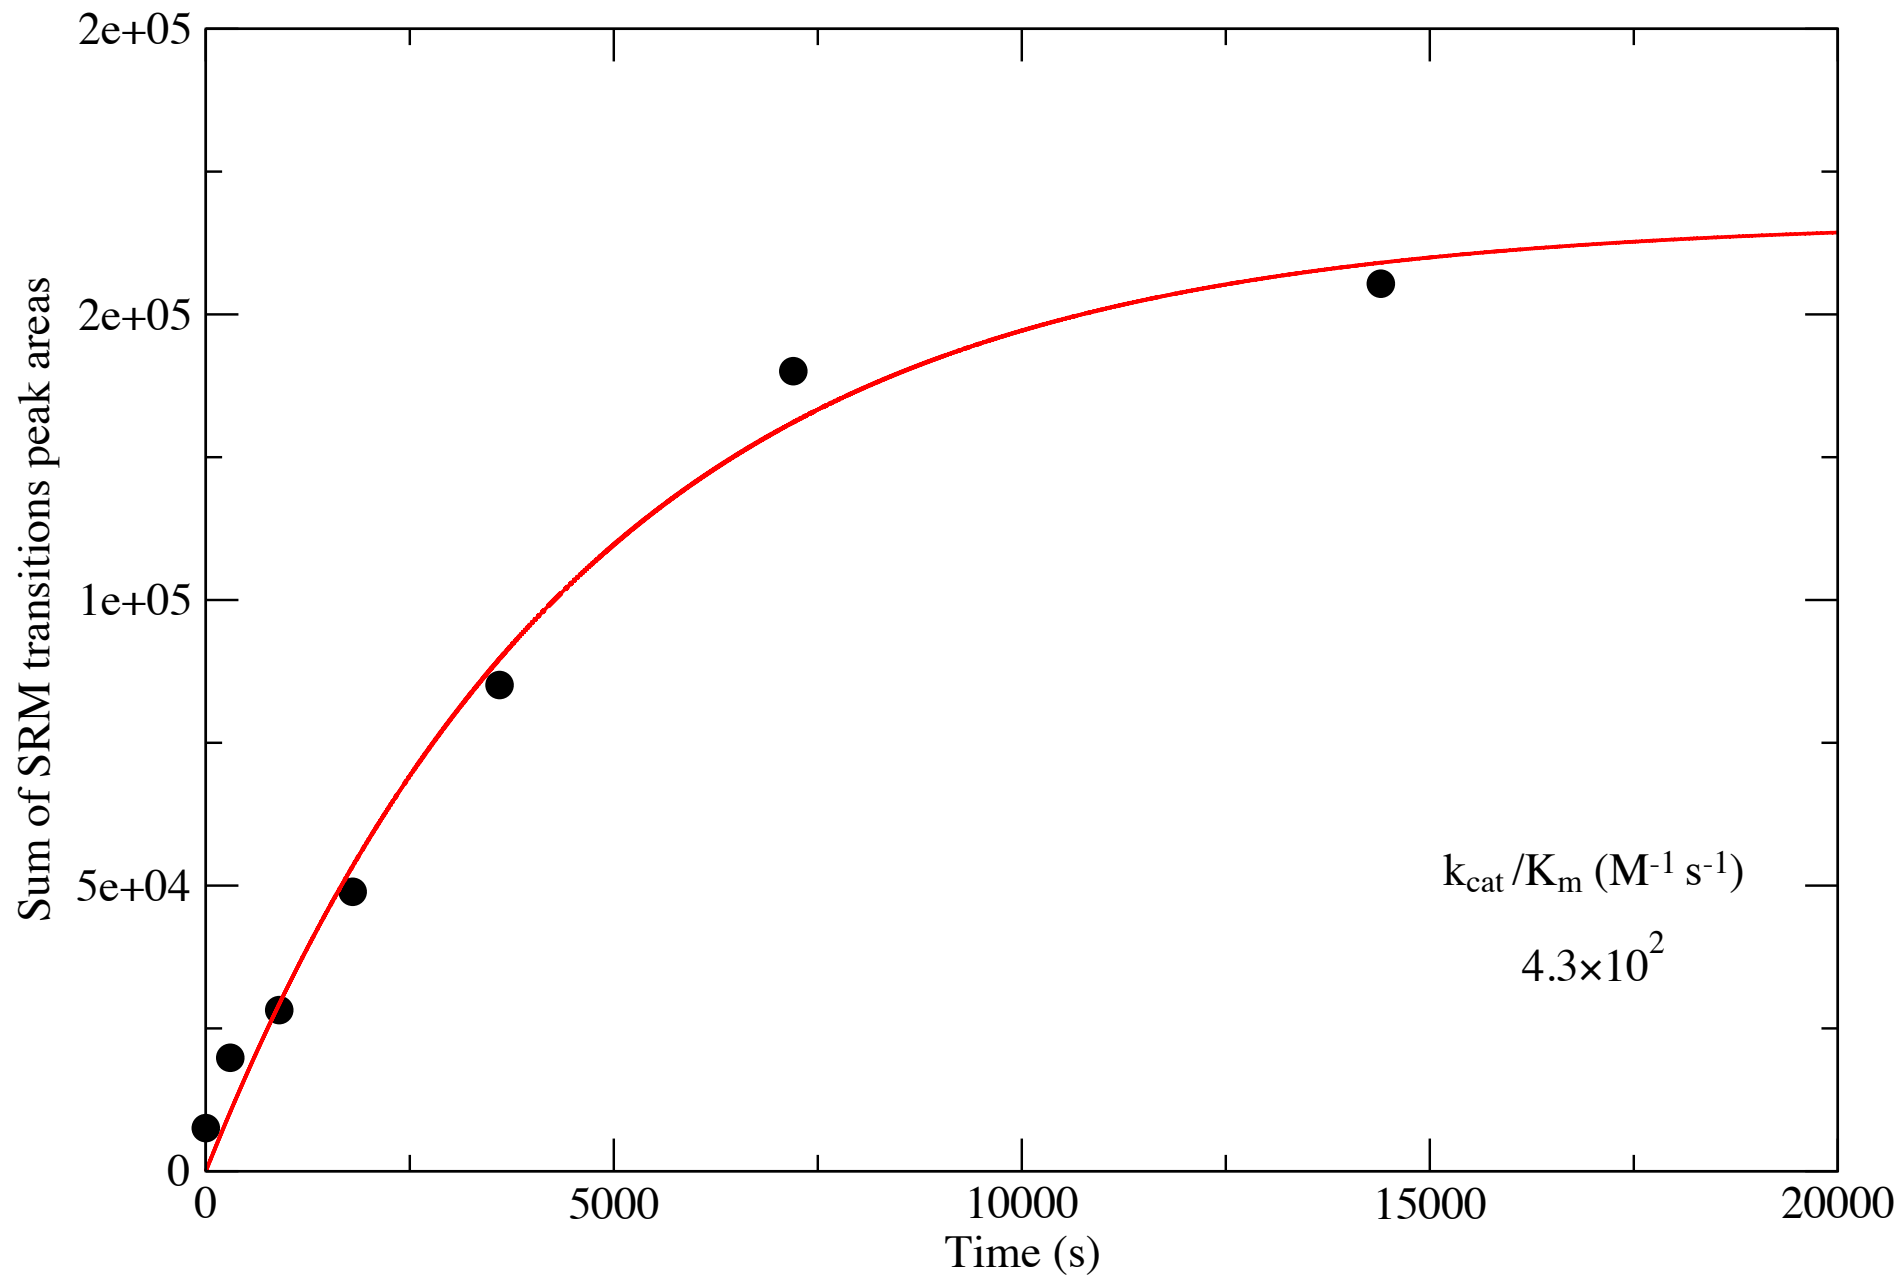

# AP3D1\_HUMAN (AWINEPLSDSESEDERPR)

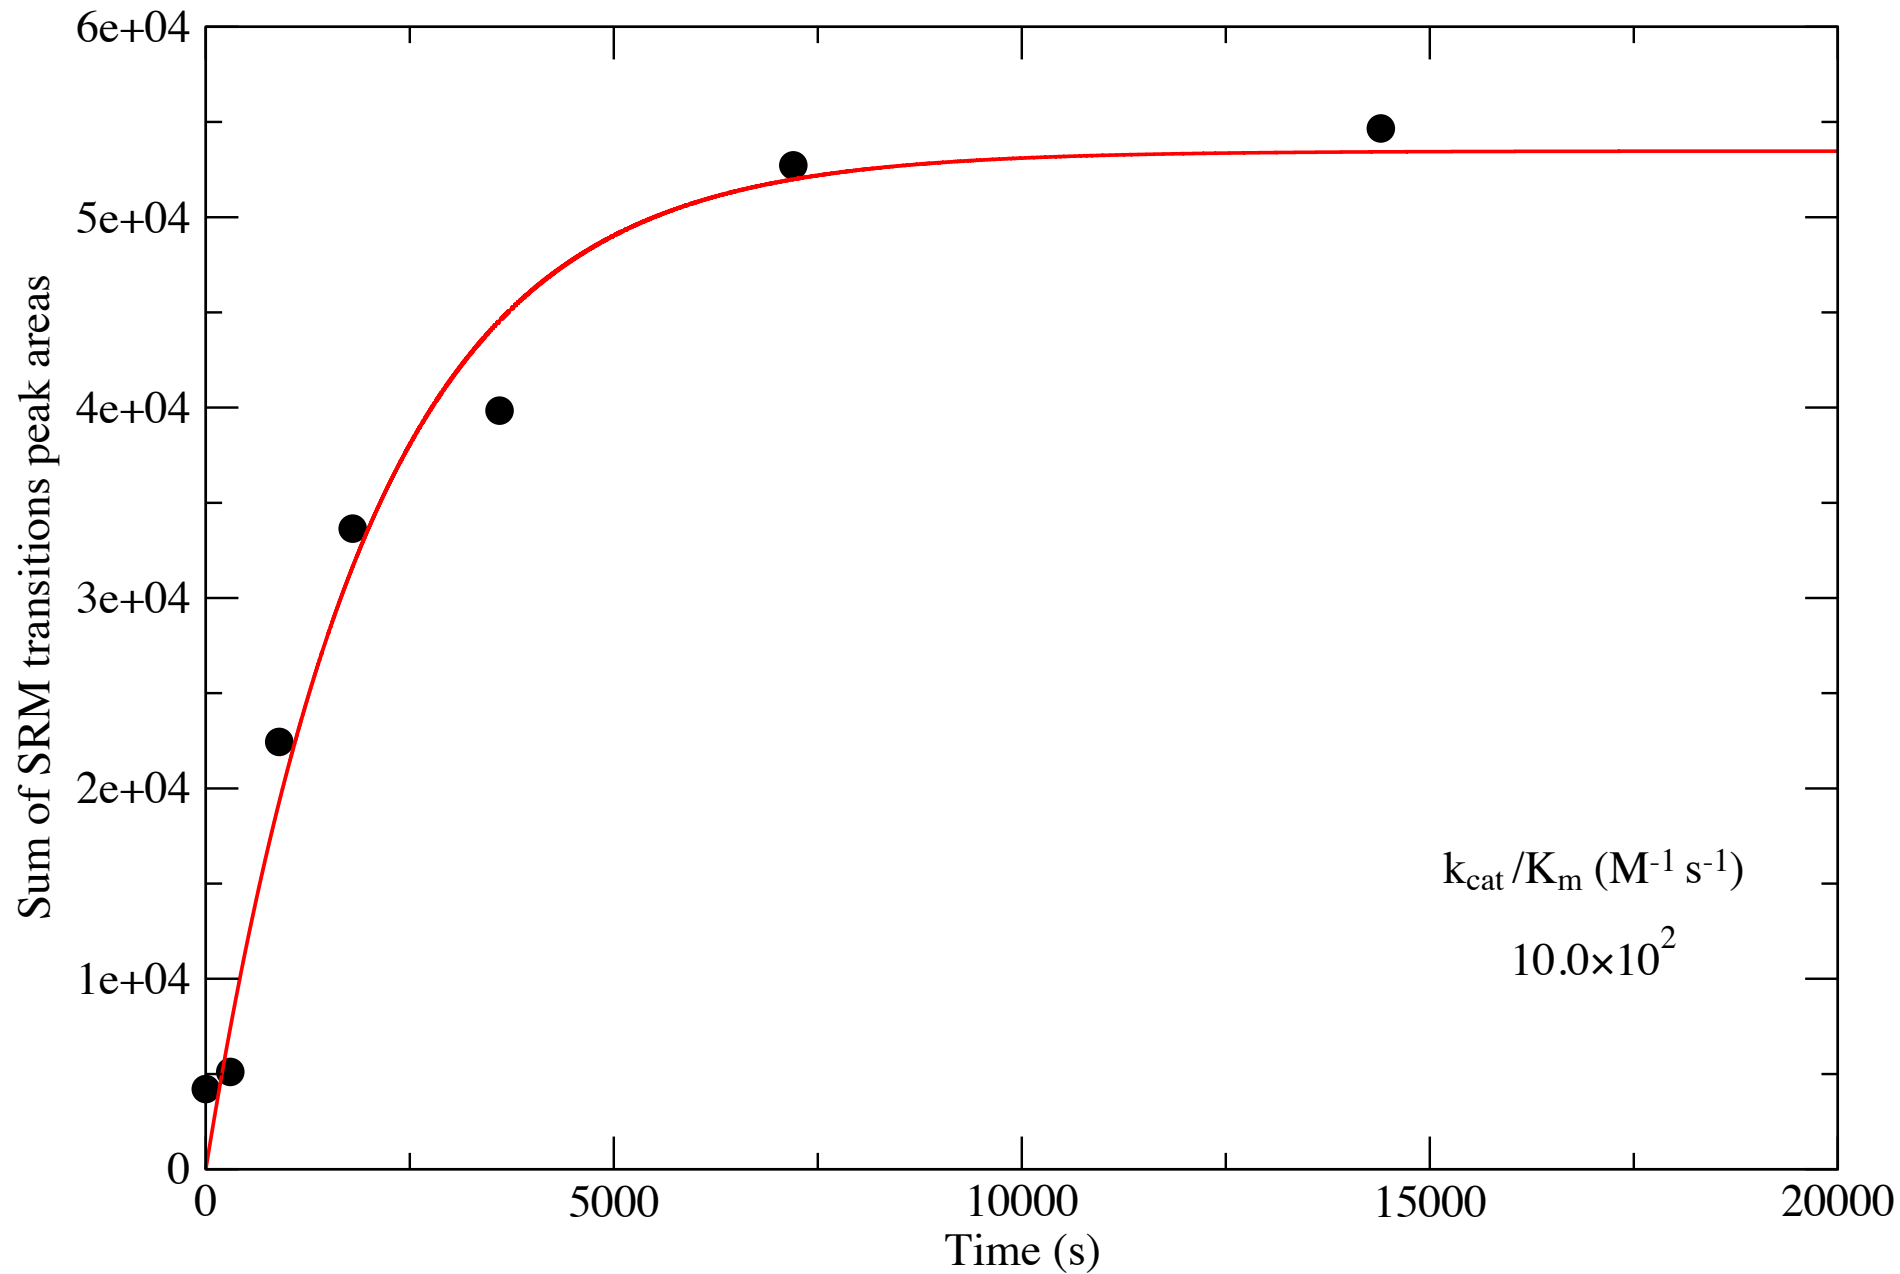

# APTX\_HUMAN (AAQEAEAGTGLEPGSNSGQC SVPLKK)

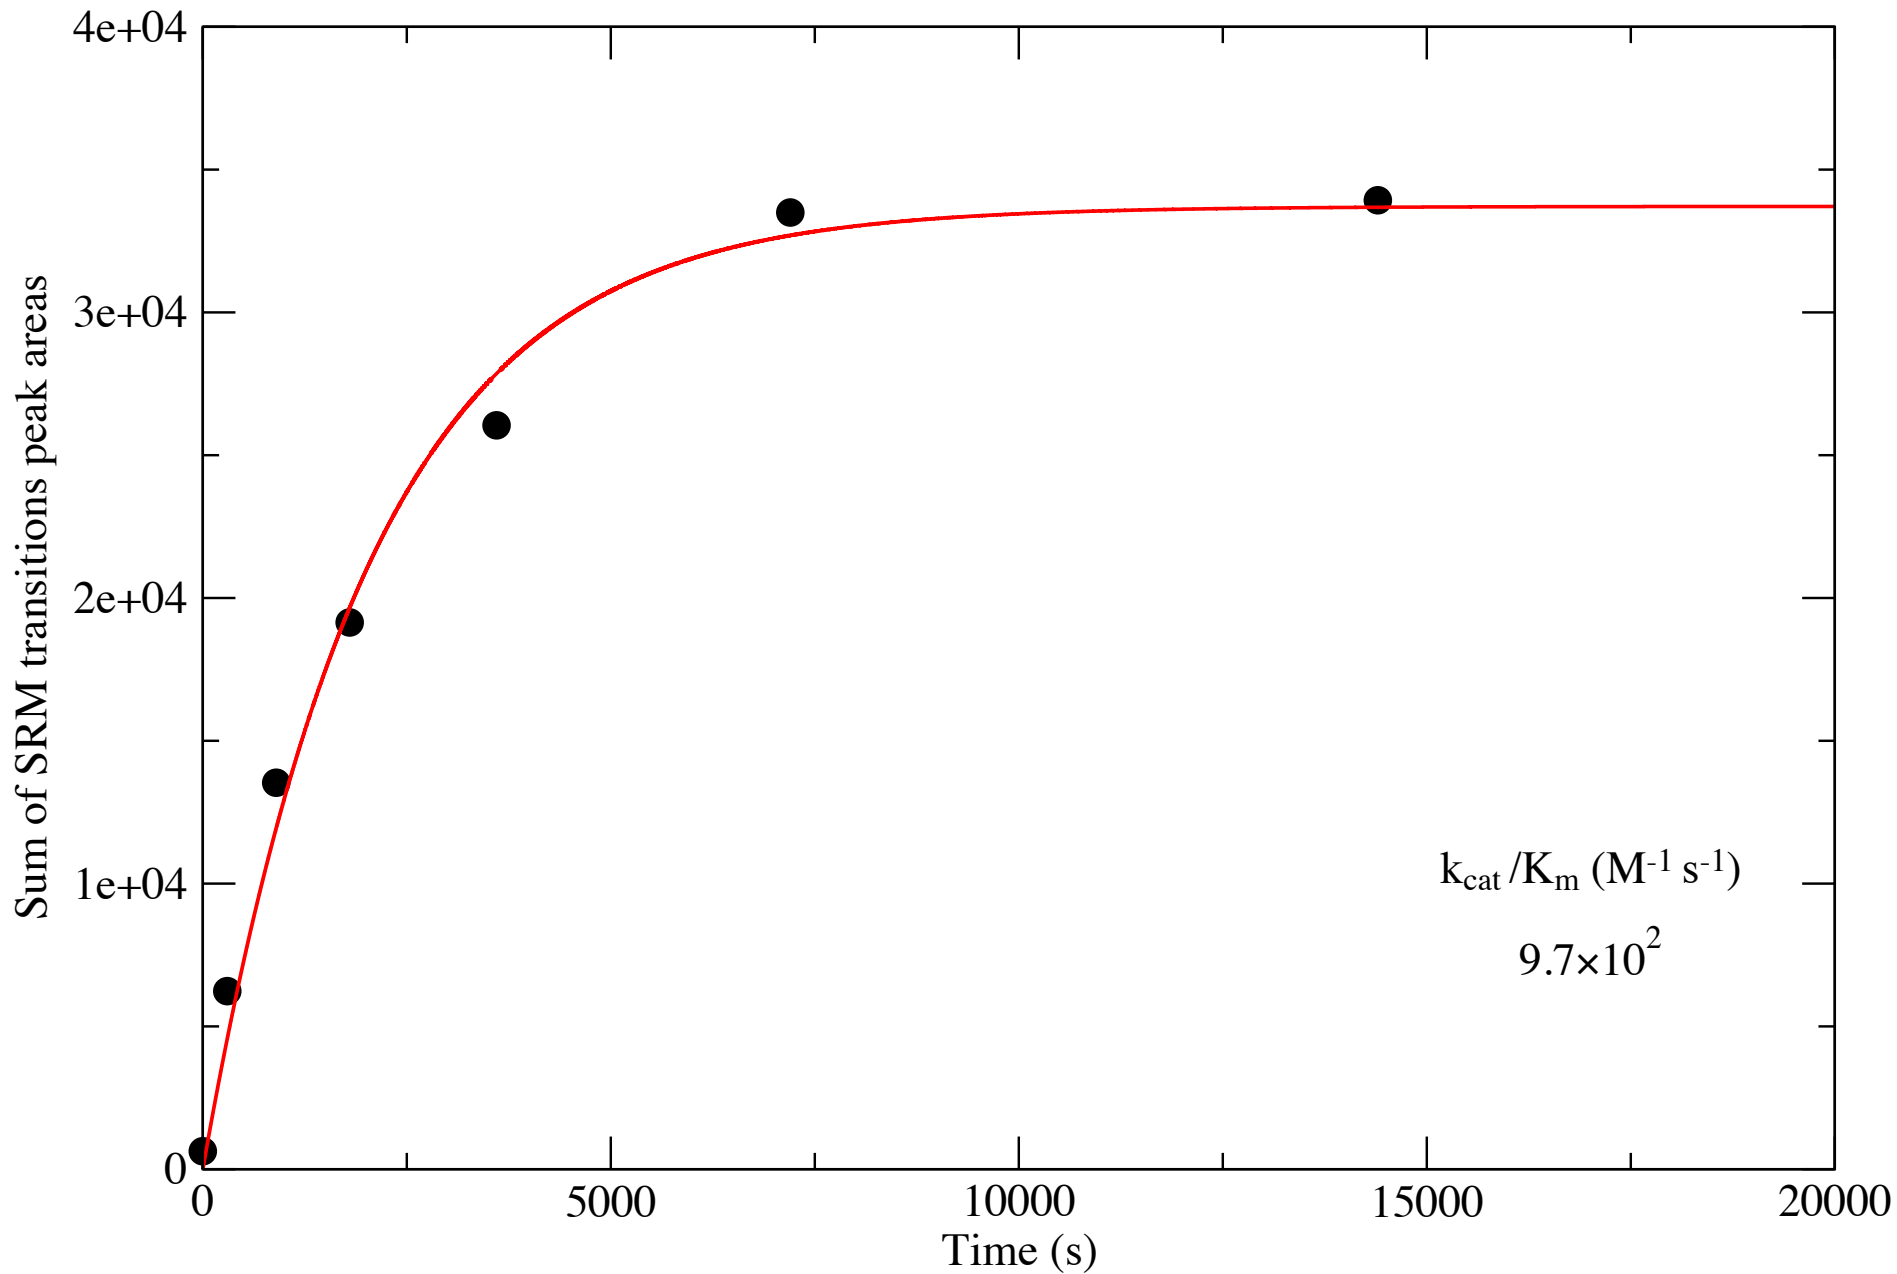

# ARHG2\_HUMAN (GGSGMALPTLPR)

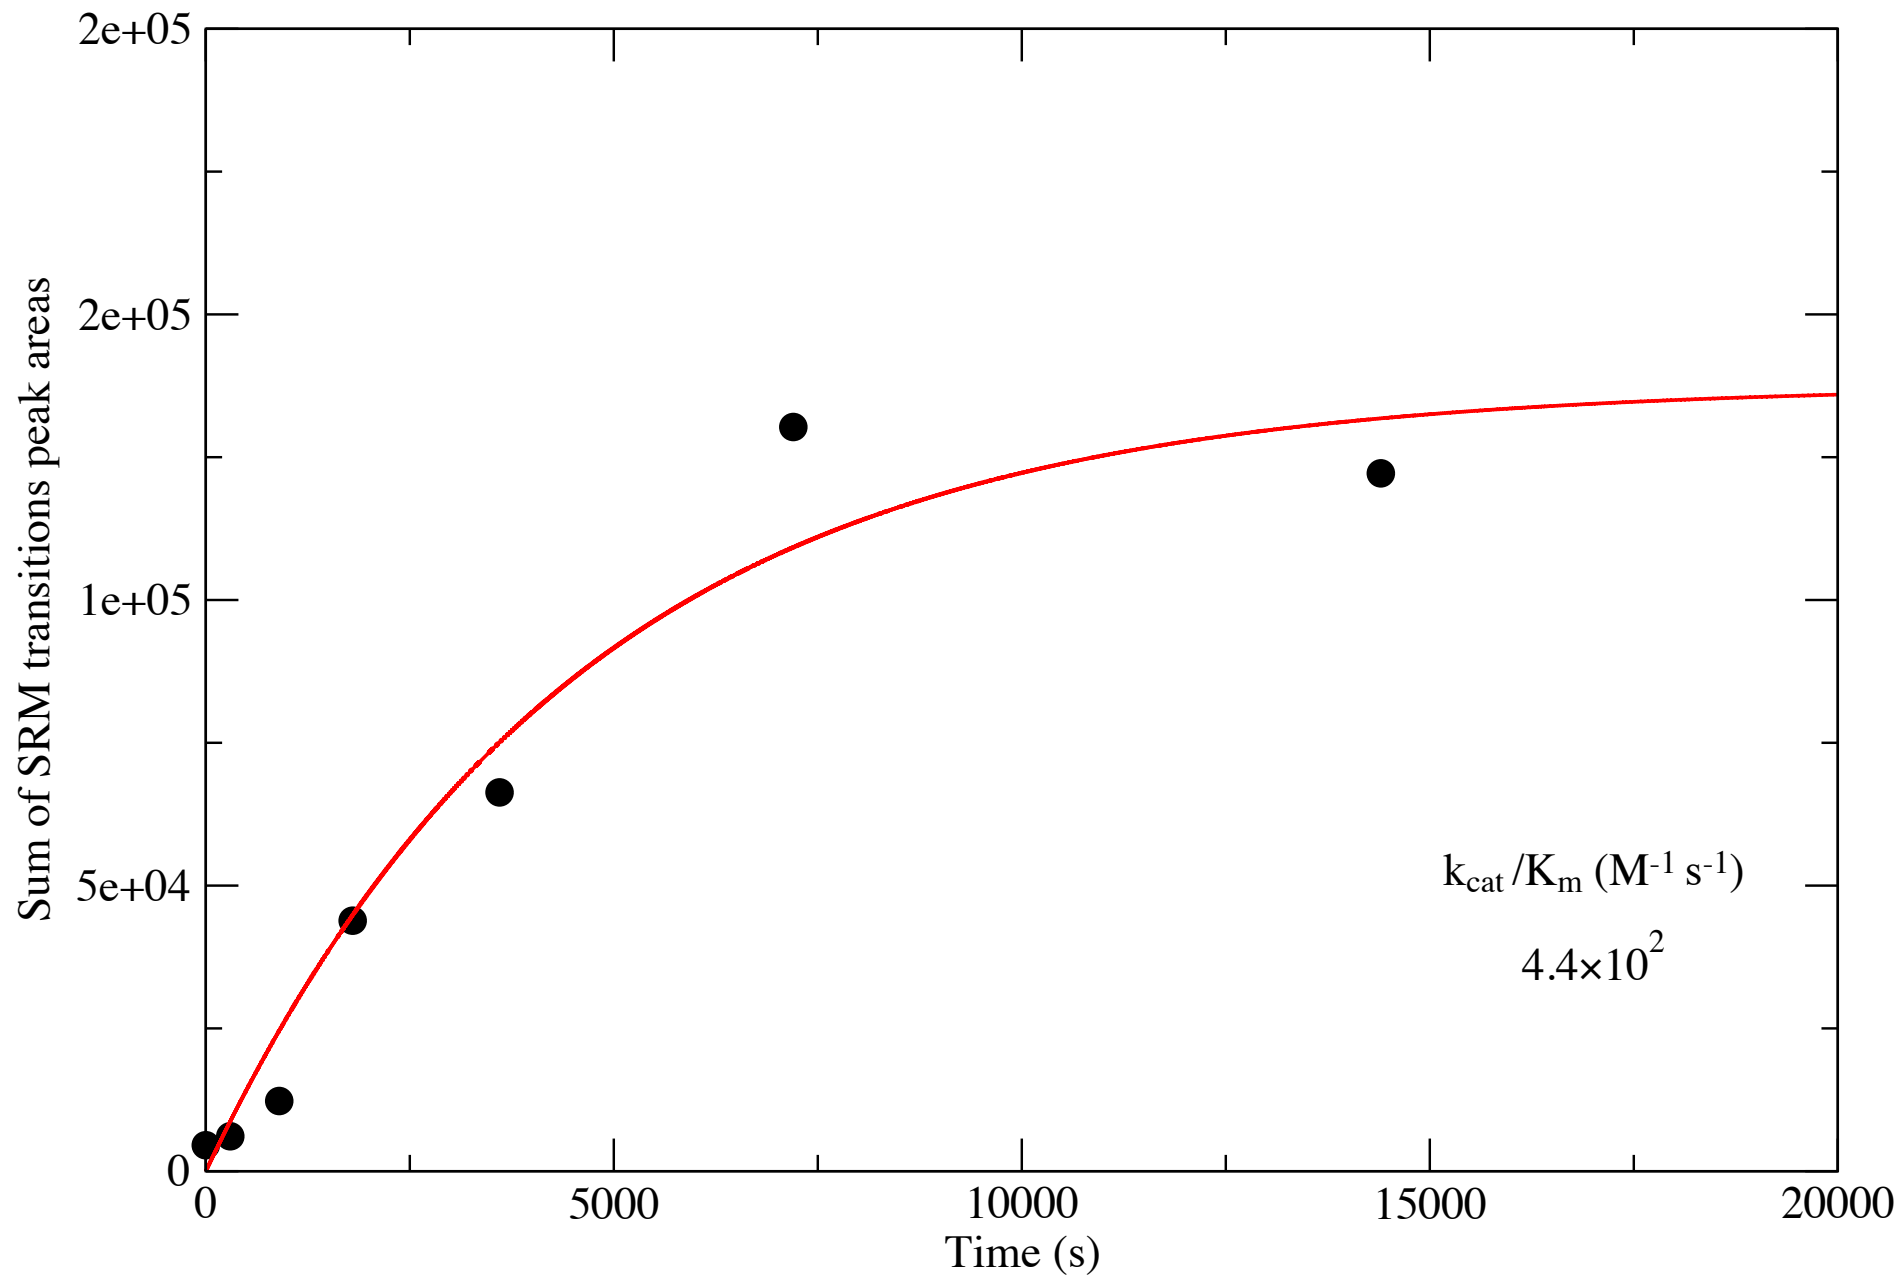

# ASCC1\_HUMAN (FYQGSMECADEPCDAYEVEQTPQGFR)

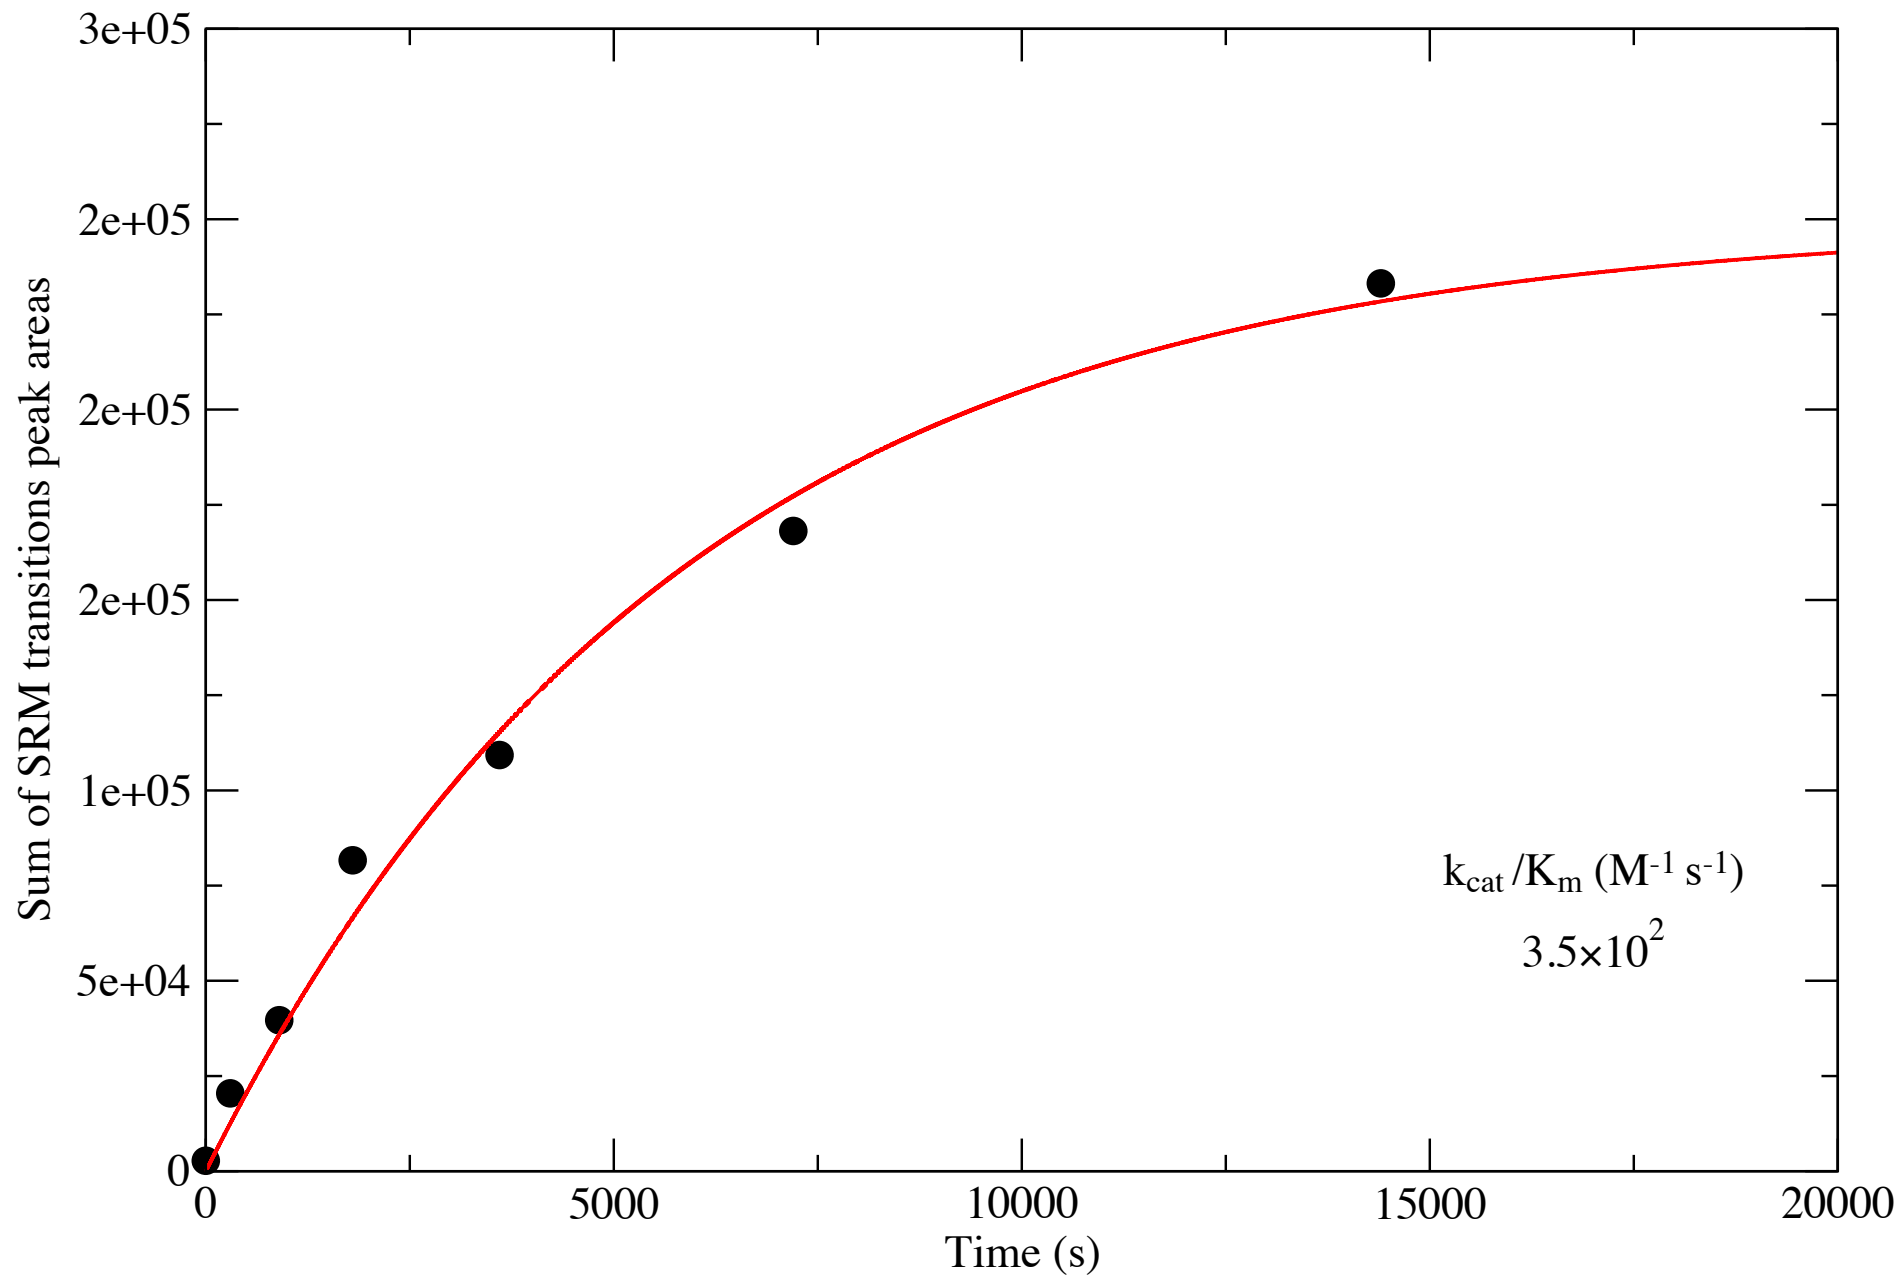

# ATAD1\_HUMAN (GFSGSDLKEMCR)

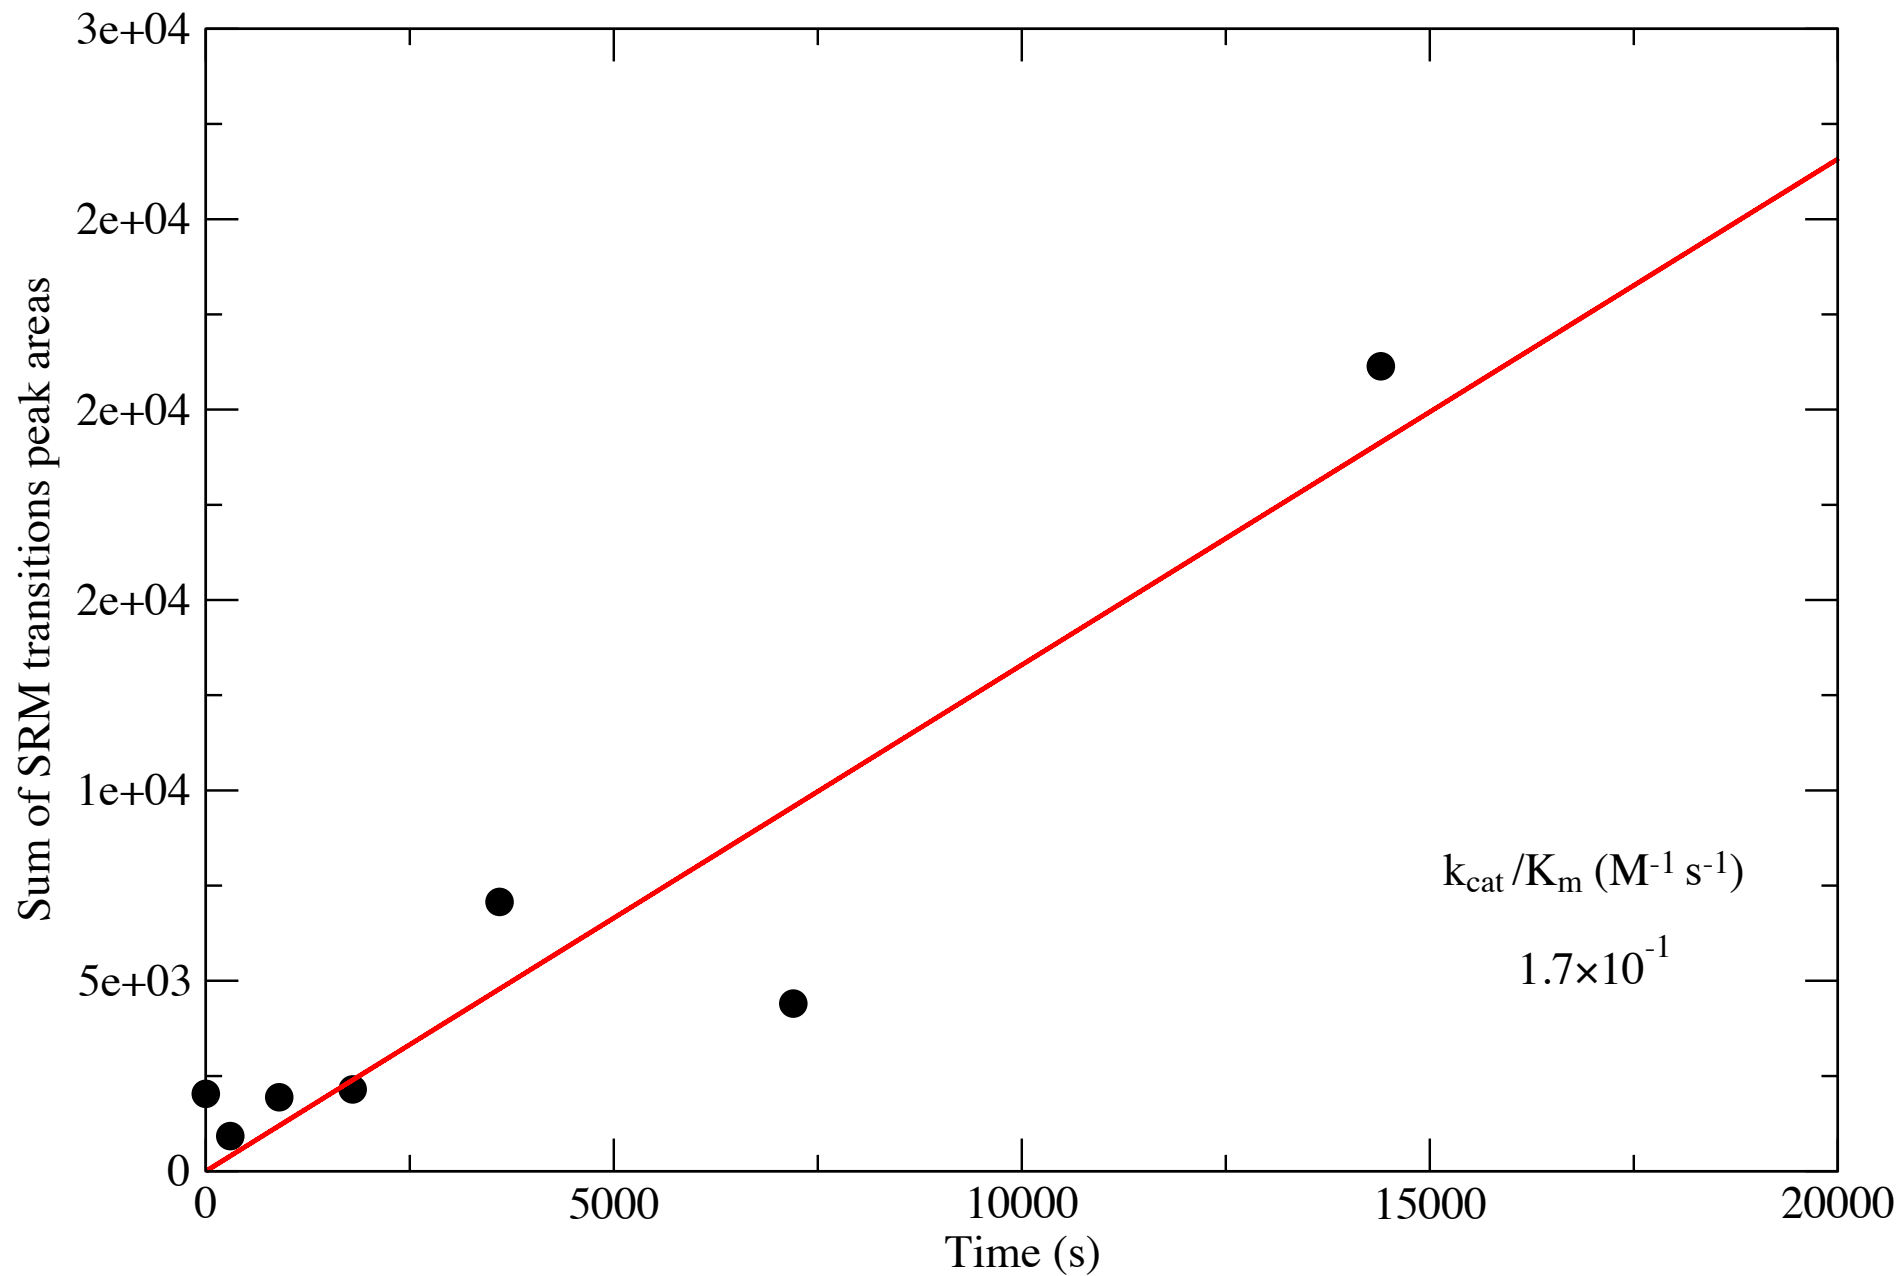

# ATX1L\_HUMAN (GQLFSGSQTTPR)

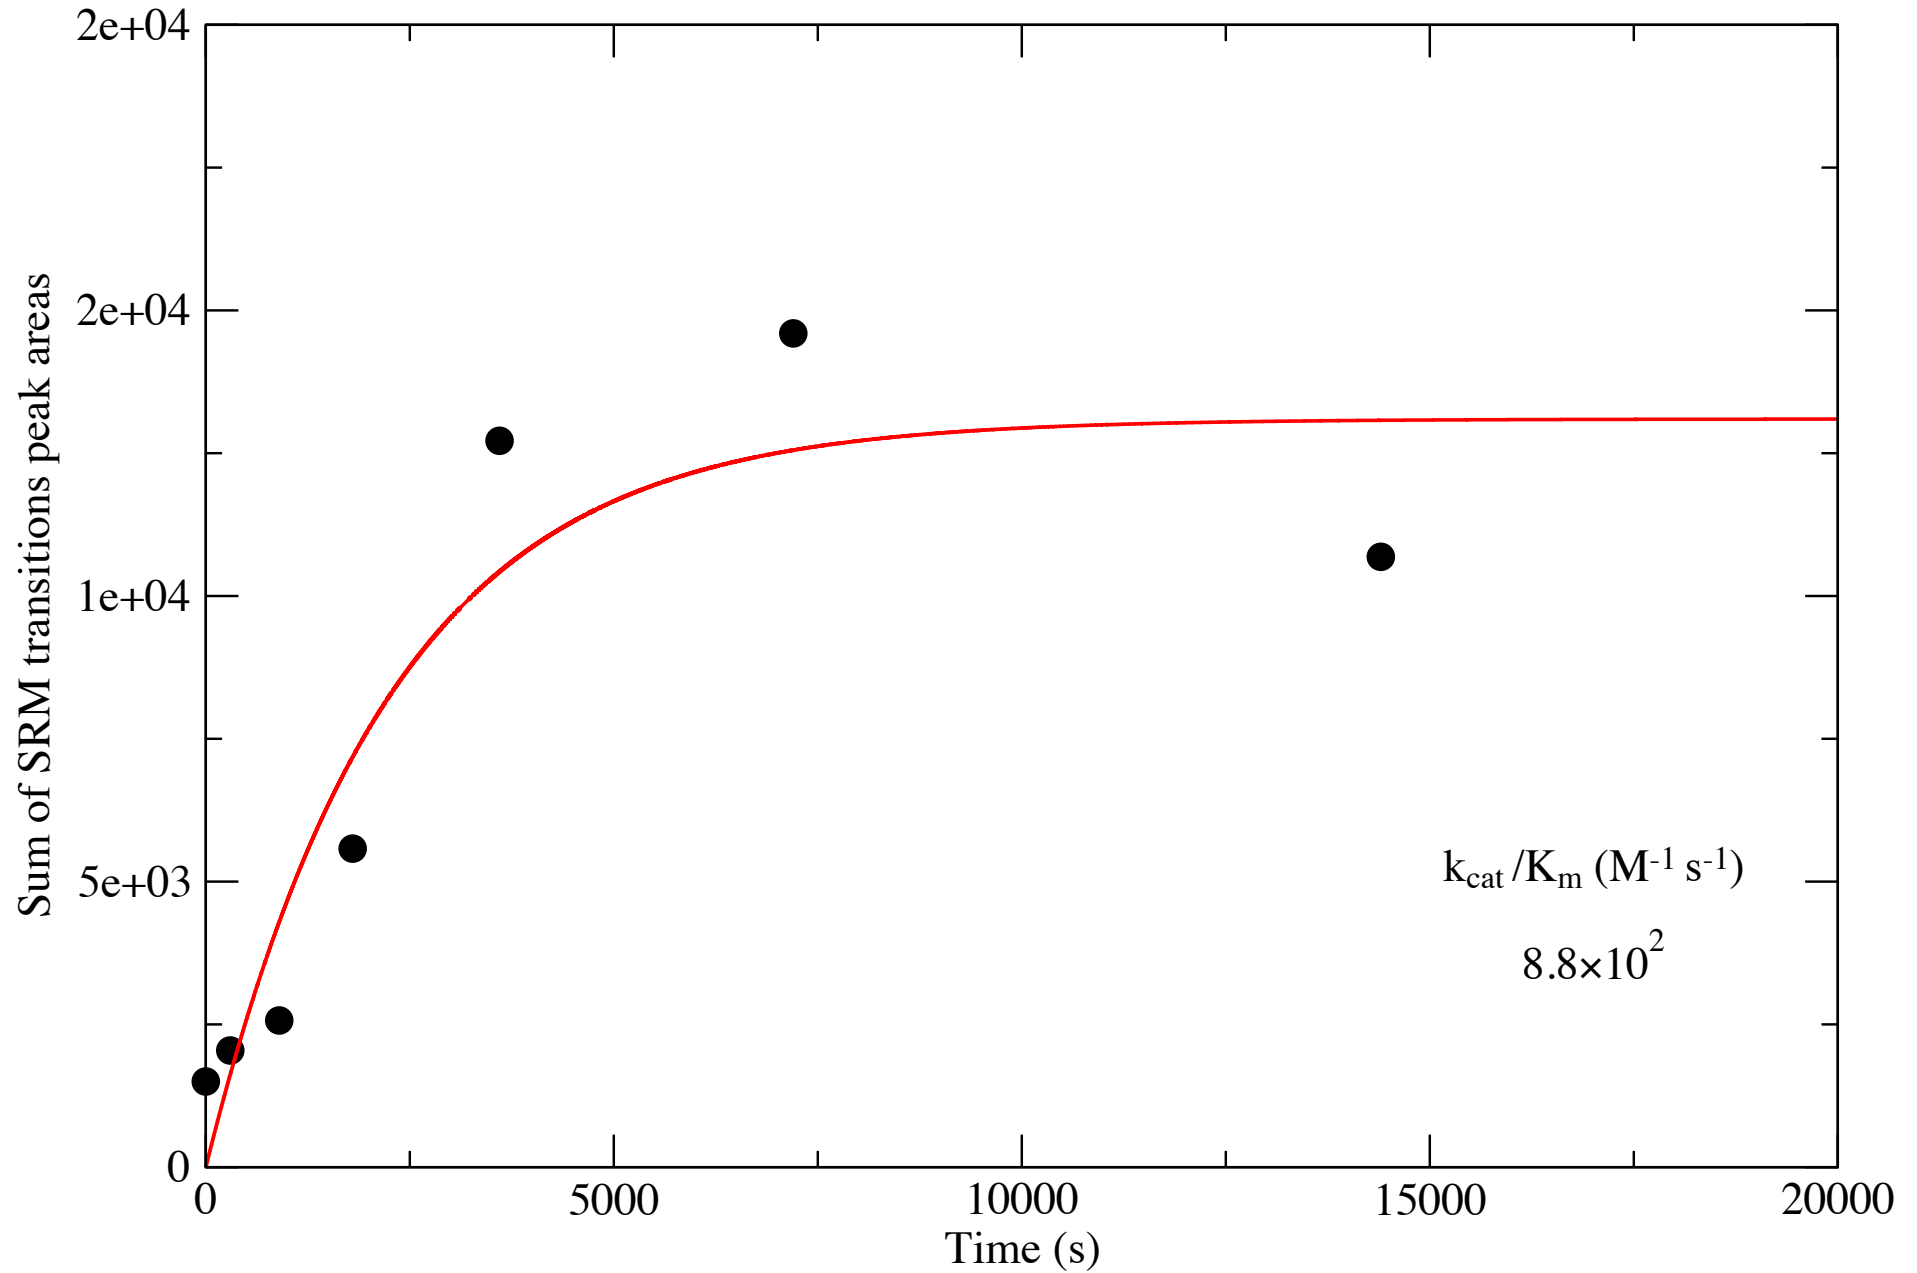

# ATX2L\_HUMAN (GLLTSEPMGSPVSSK)

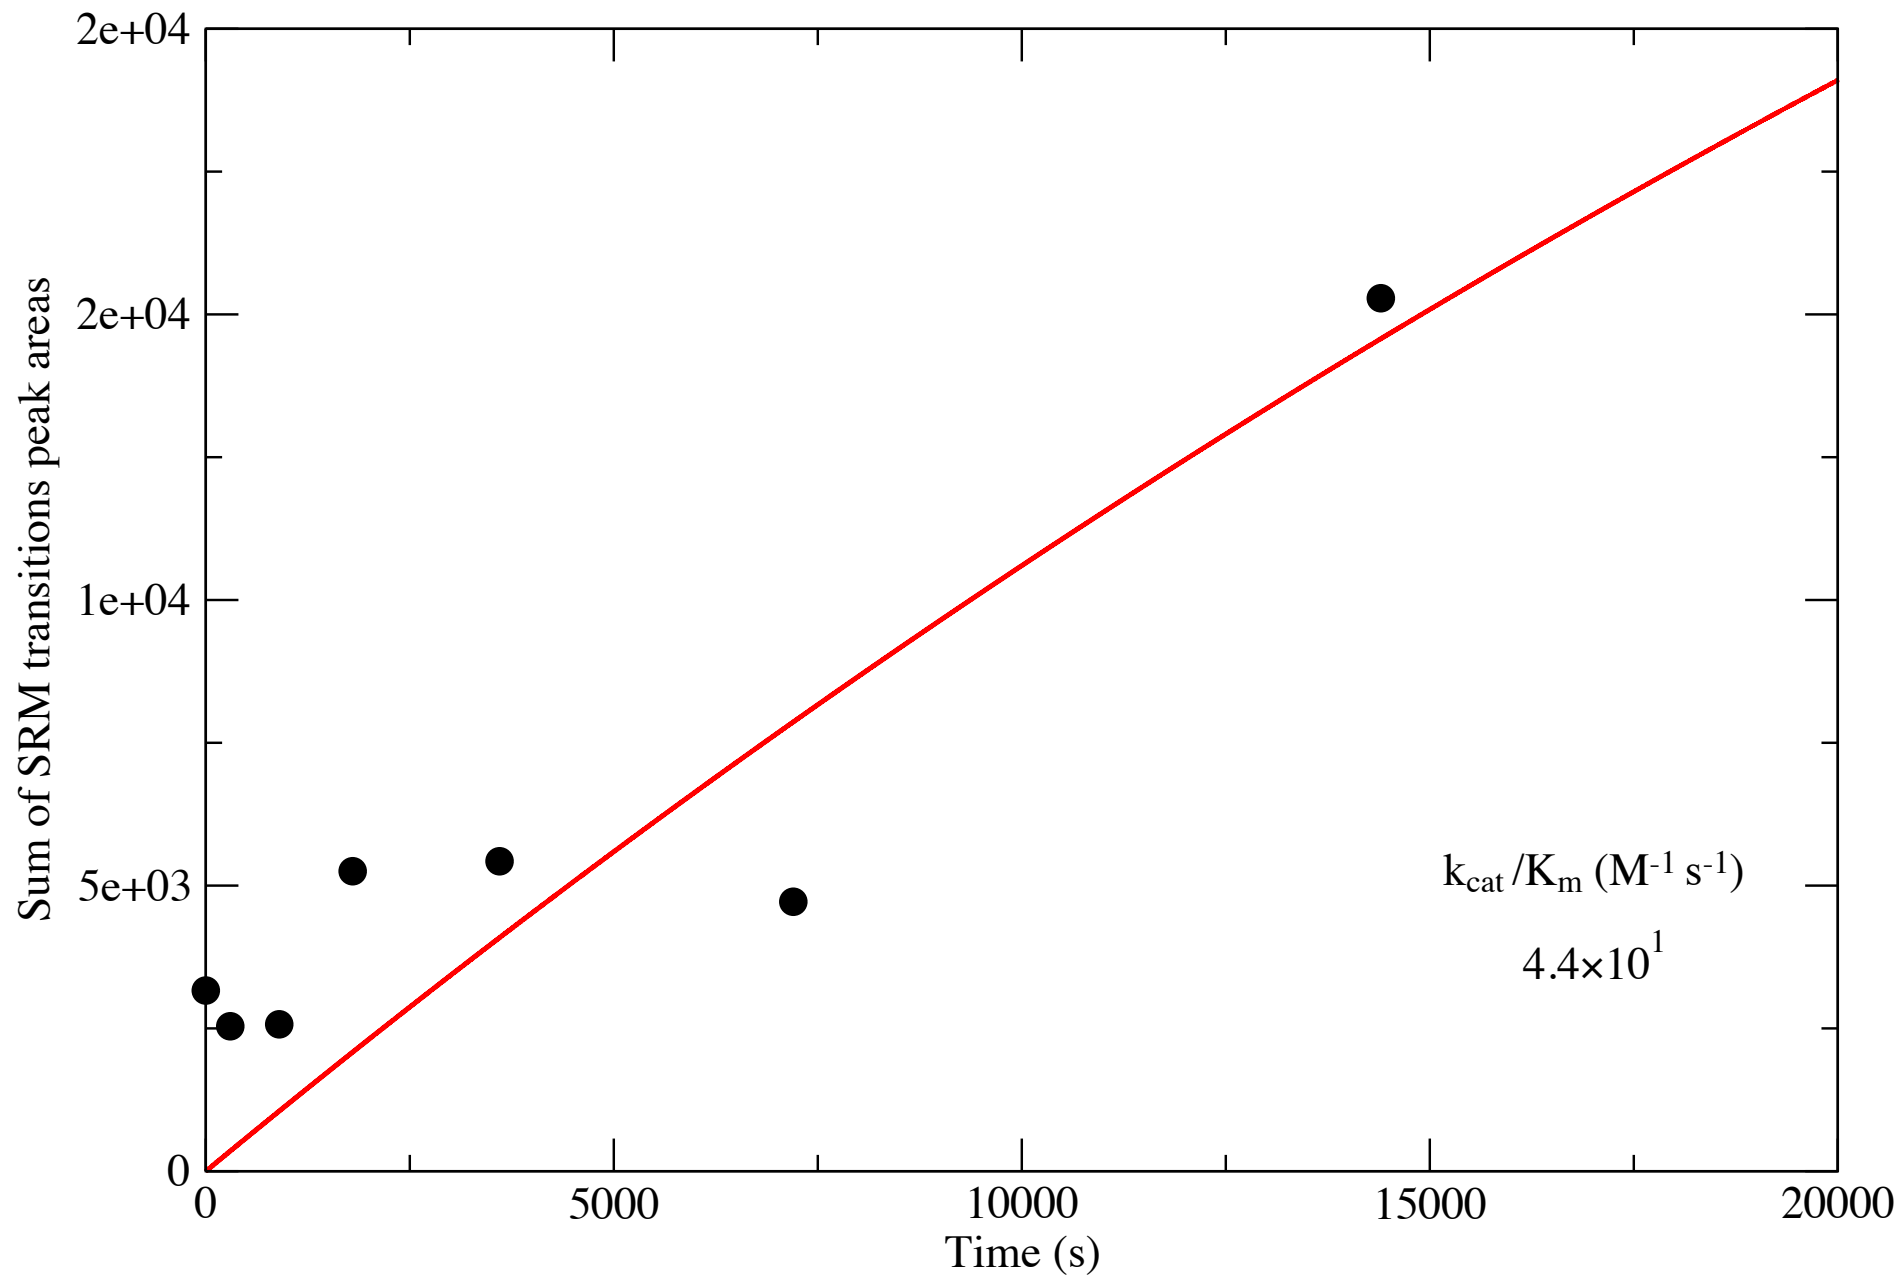



# BD1L1\_HUMAN (GAVTSAGTEIR)

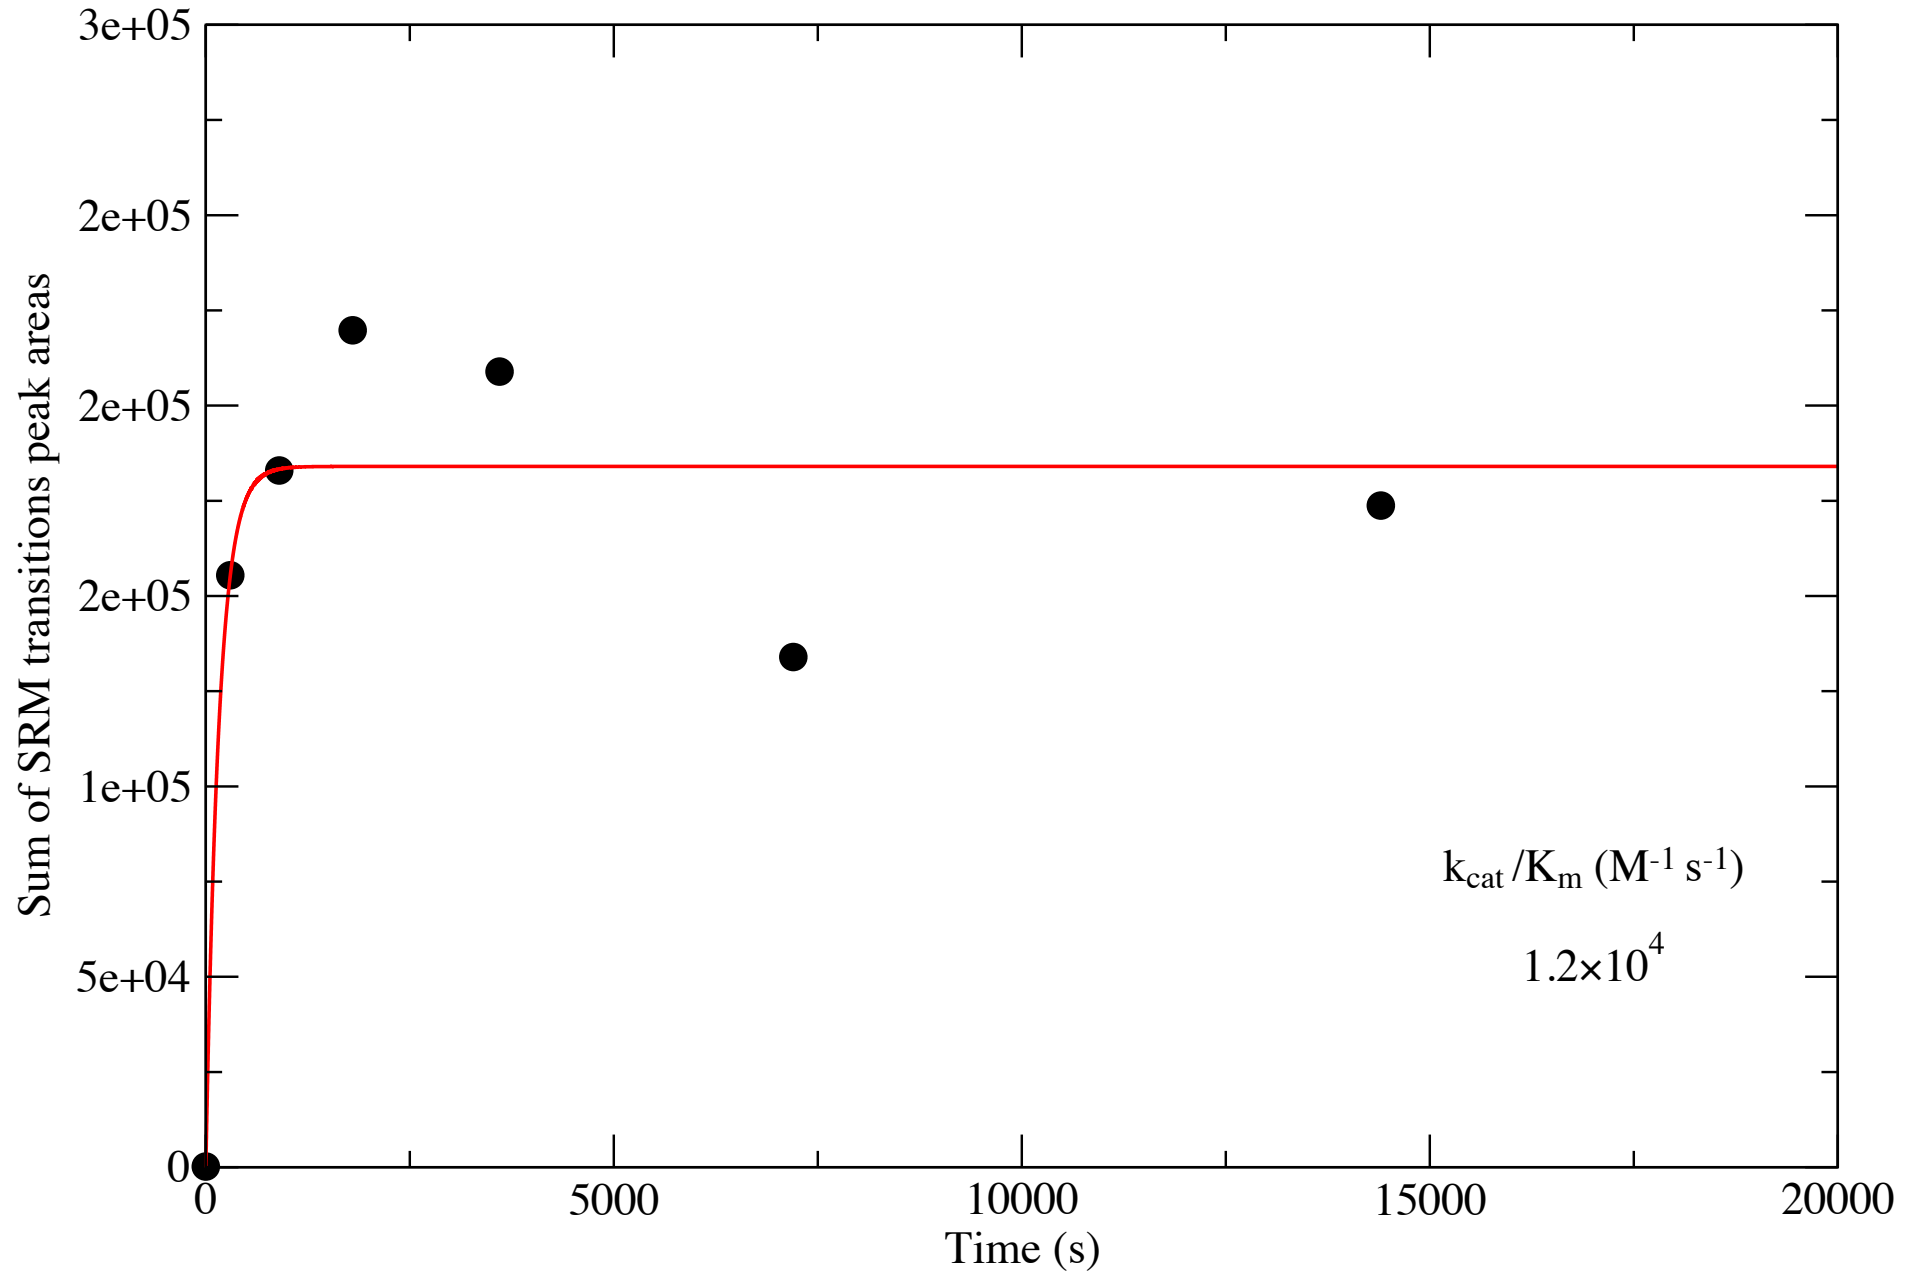

# BGAL\_HUMAN (GIPQGVLER)

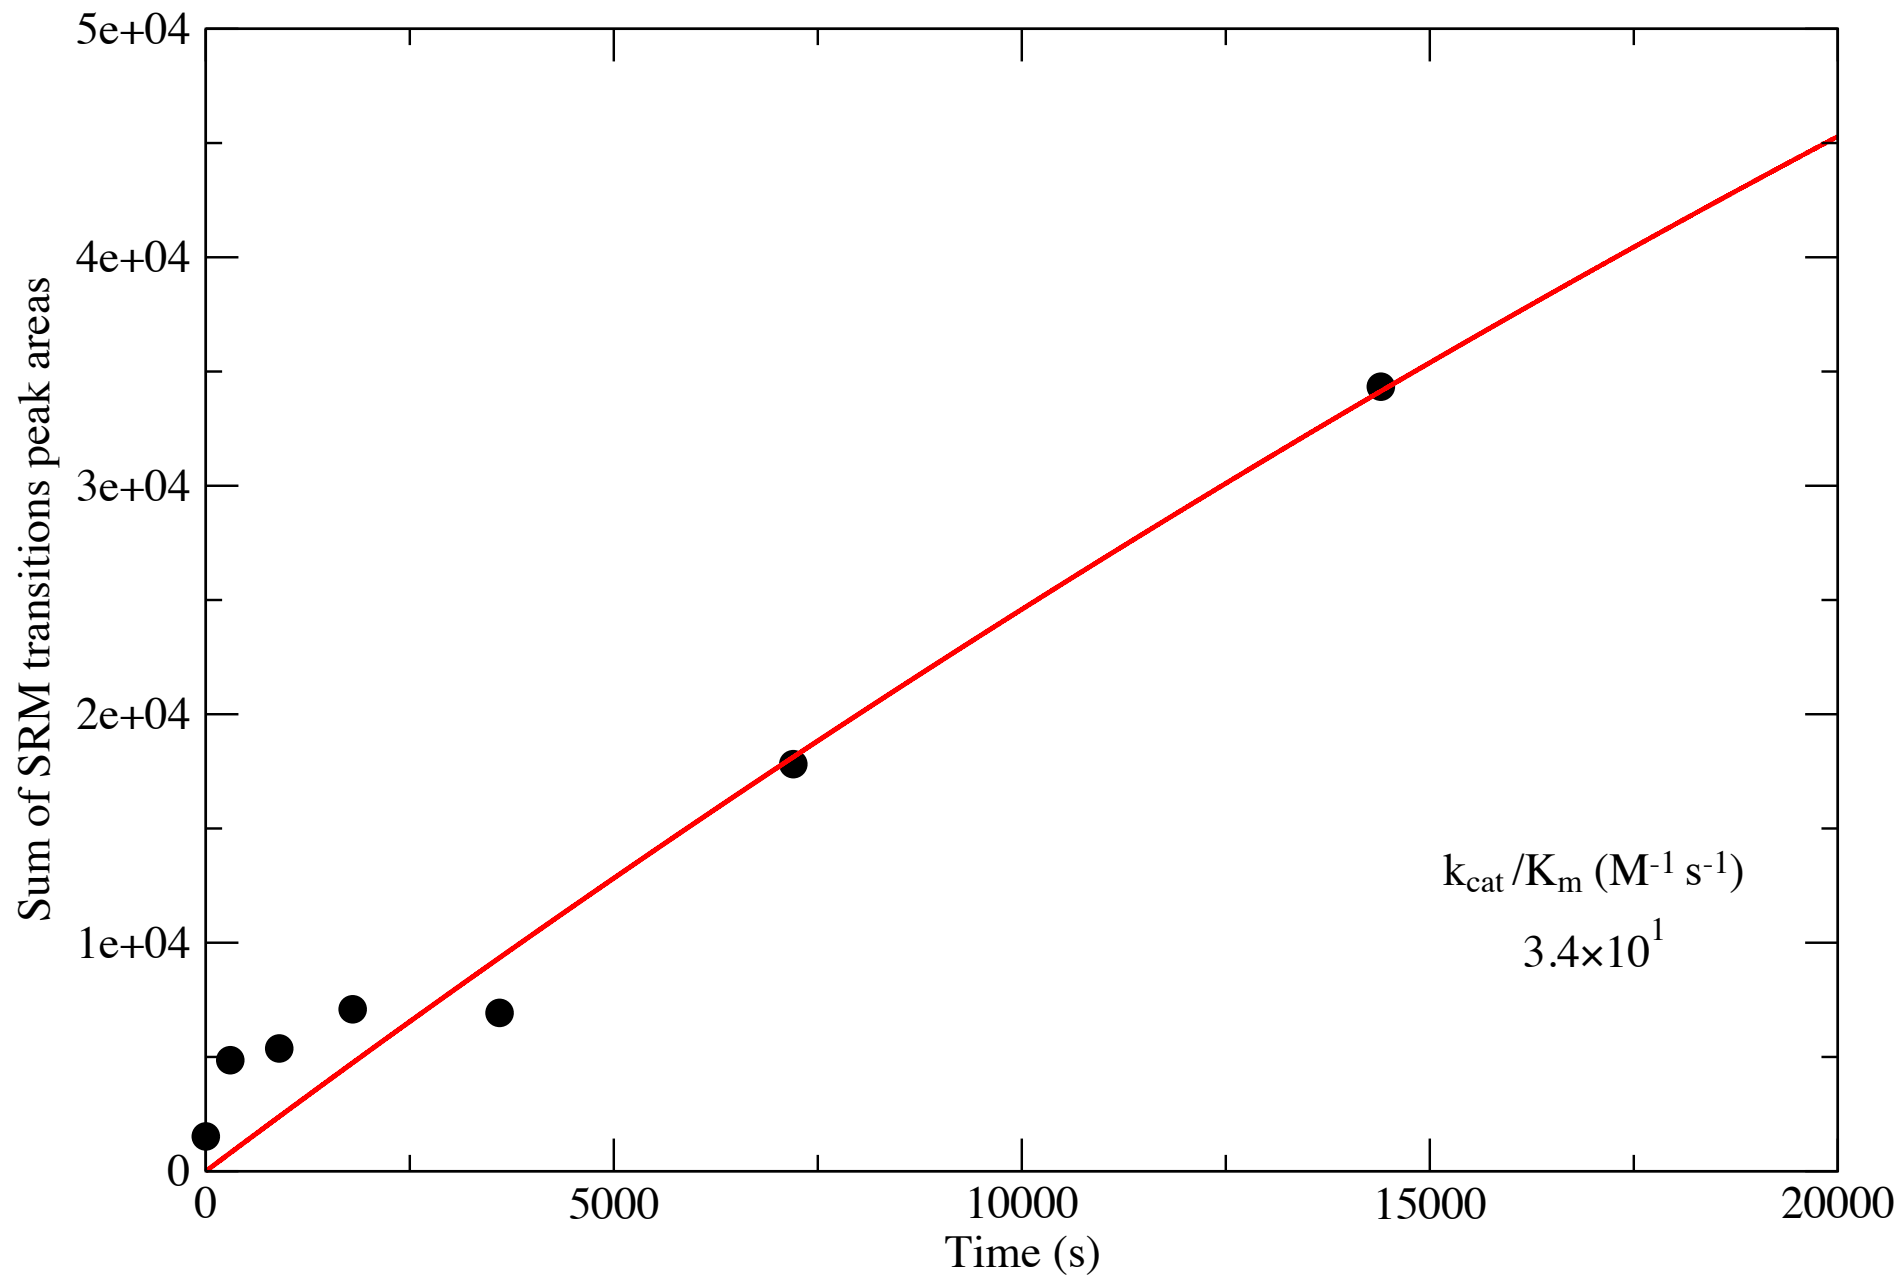

# BNIP2\_HUMAN (GLDTPSENSNEFEWEDDLPKPK)

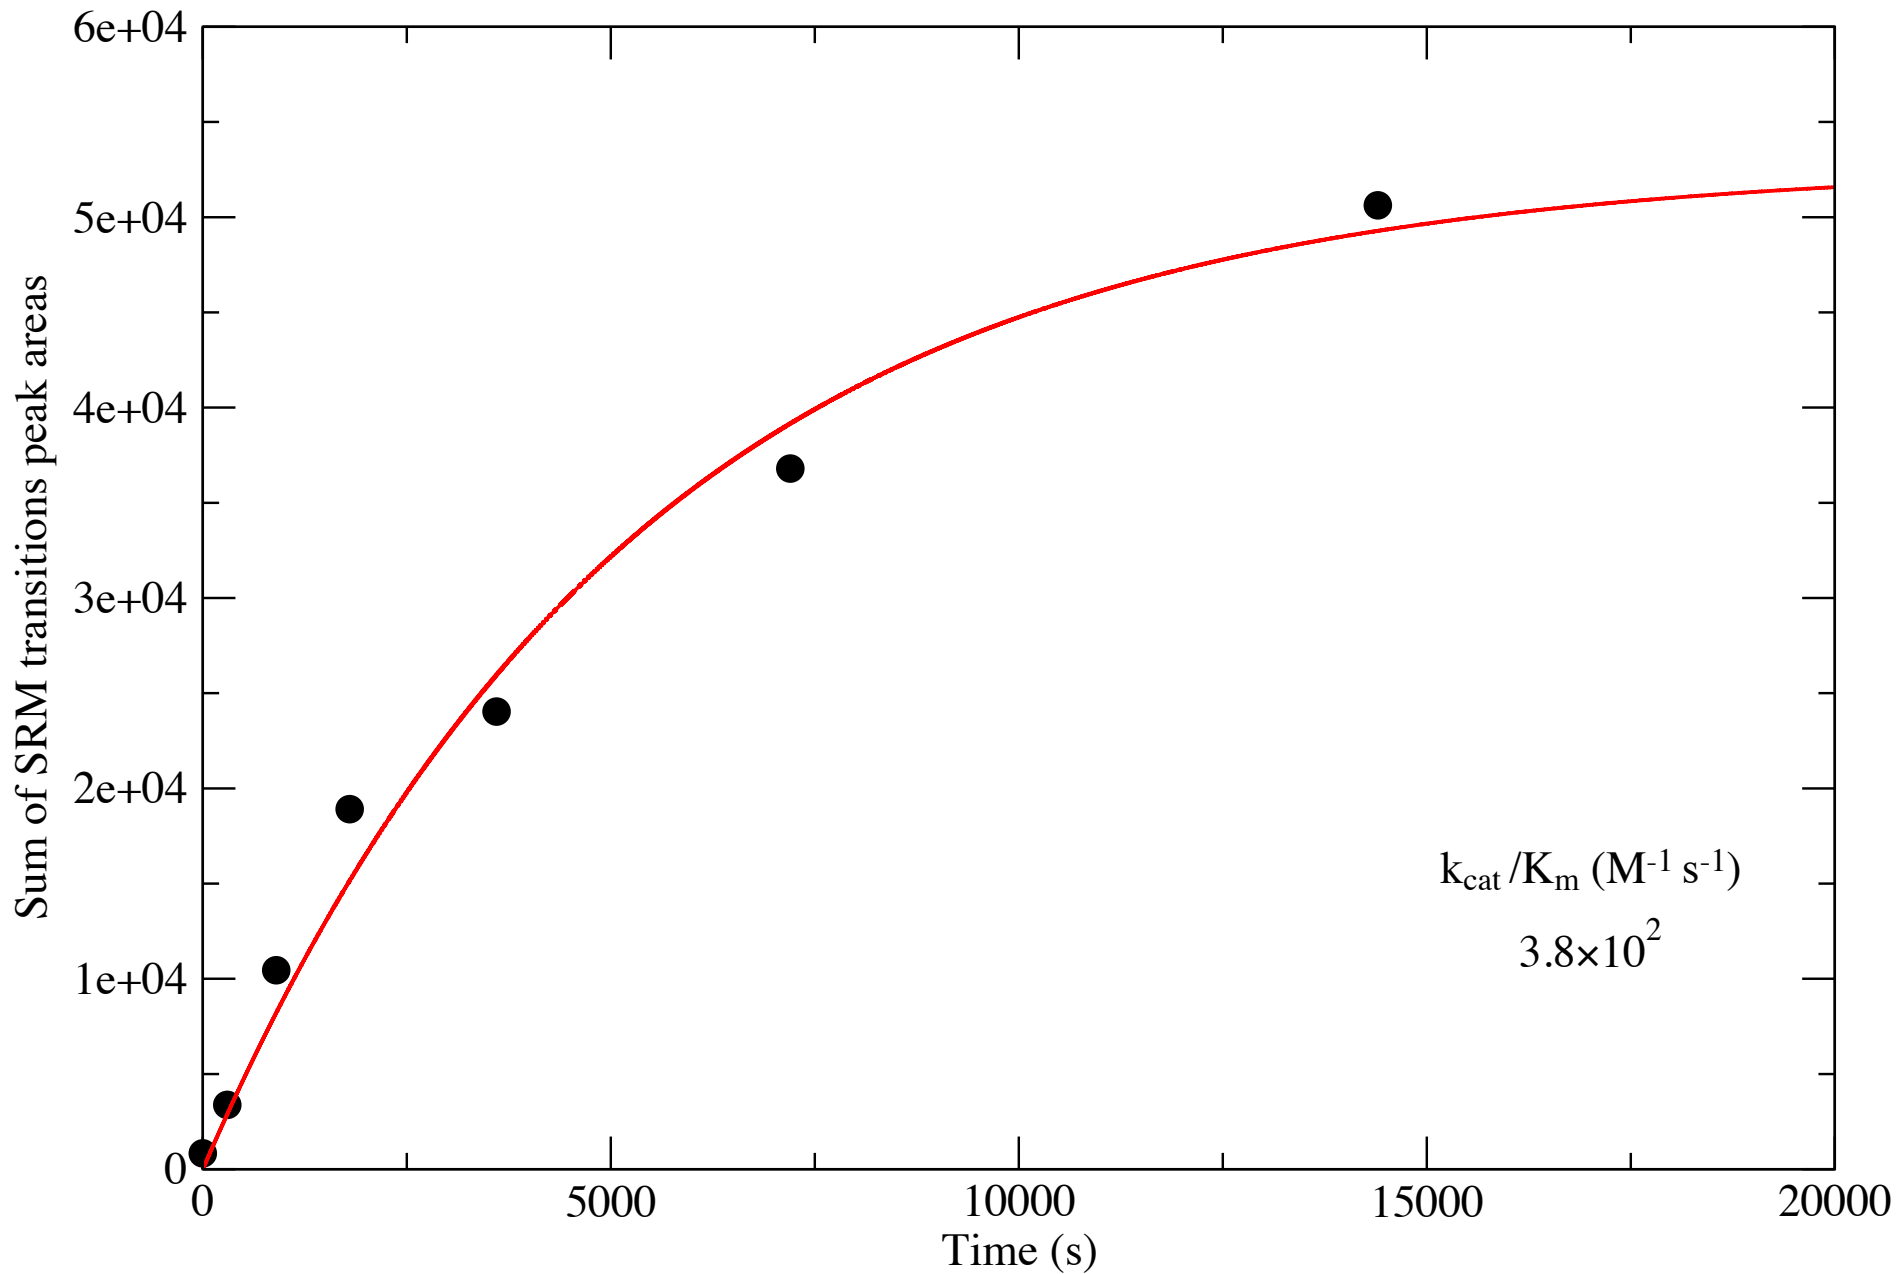

# BTF3\_HUMAN (GKAPLATGEDDDDEVDPDLVENFDEASKNEAN)

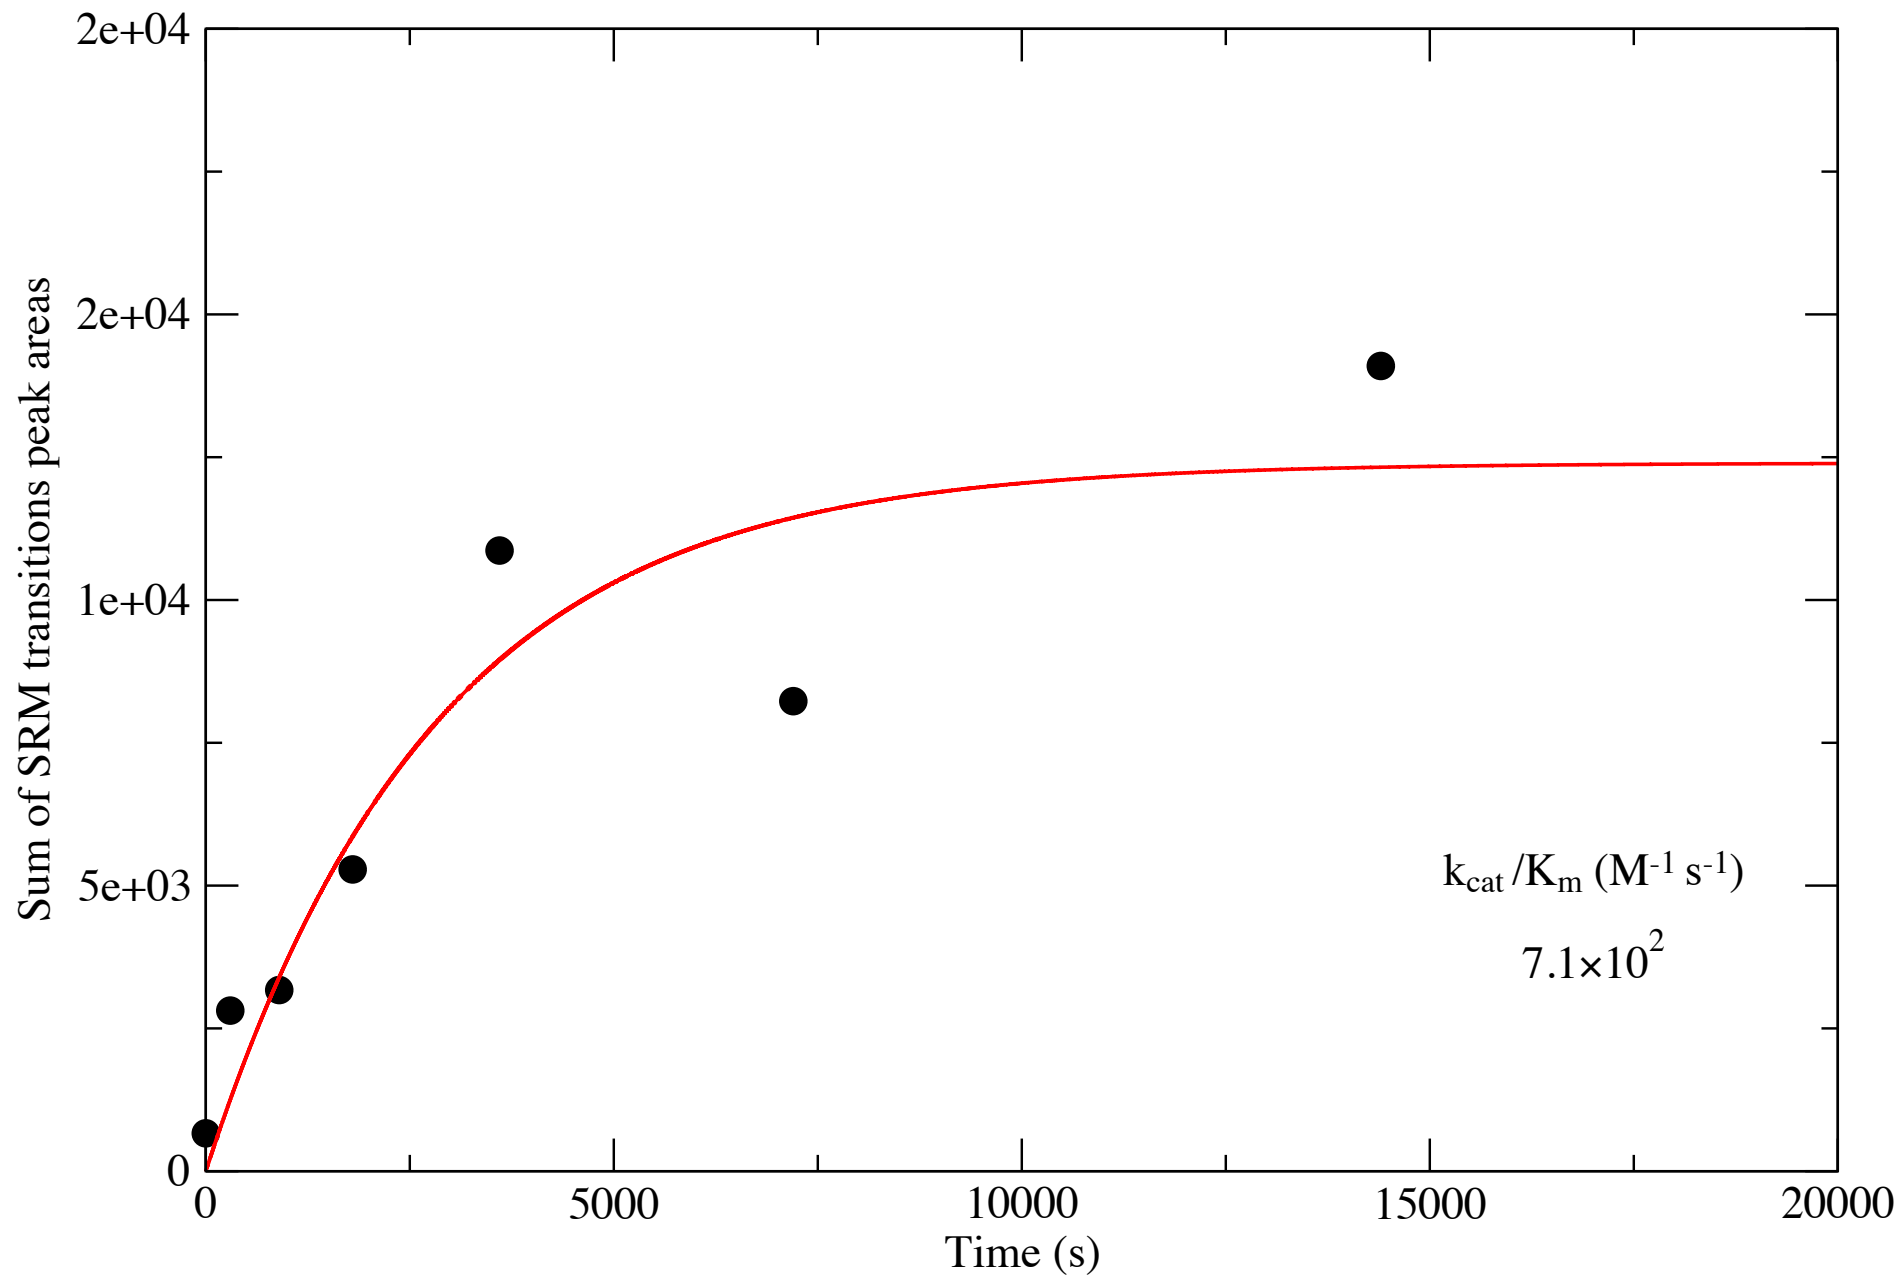

# C2D1B\_HUMAN (AVAATLAAA EK)

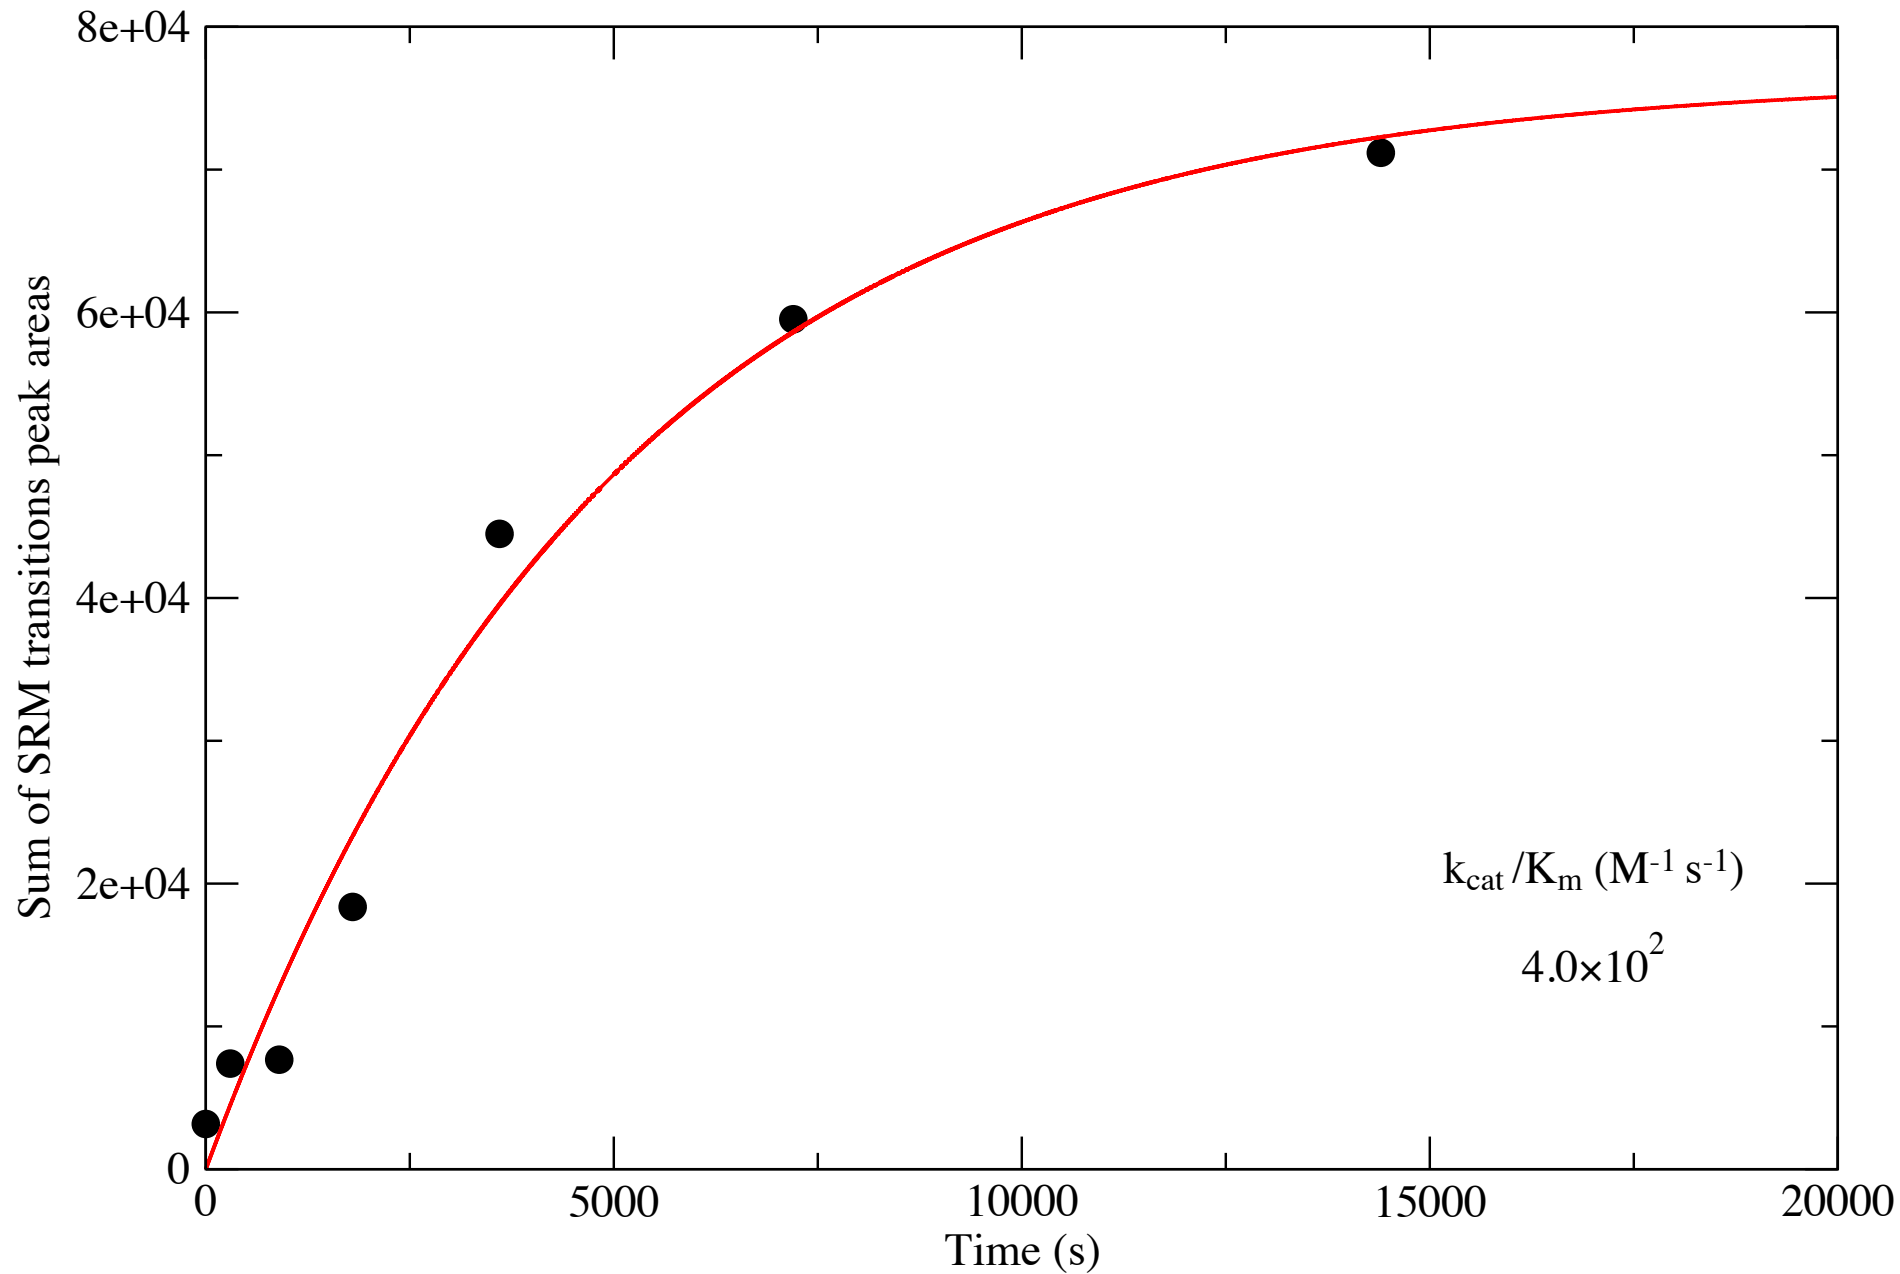

# CACO1\_HUMAN (GGSDILLVVPK)

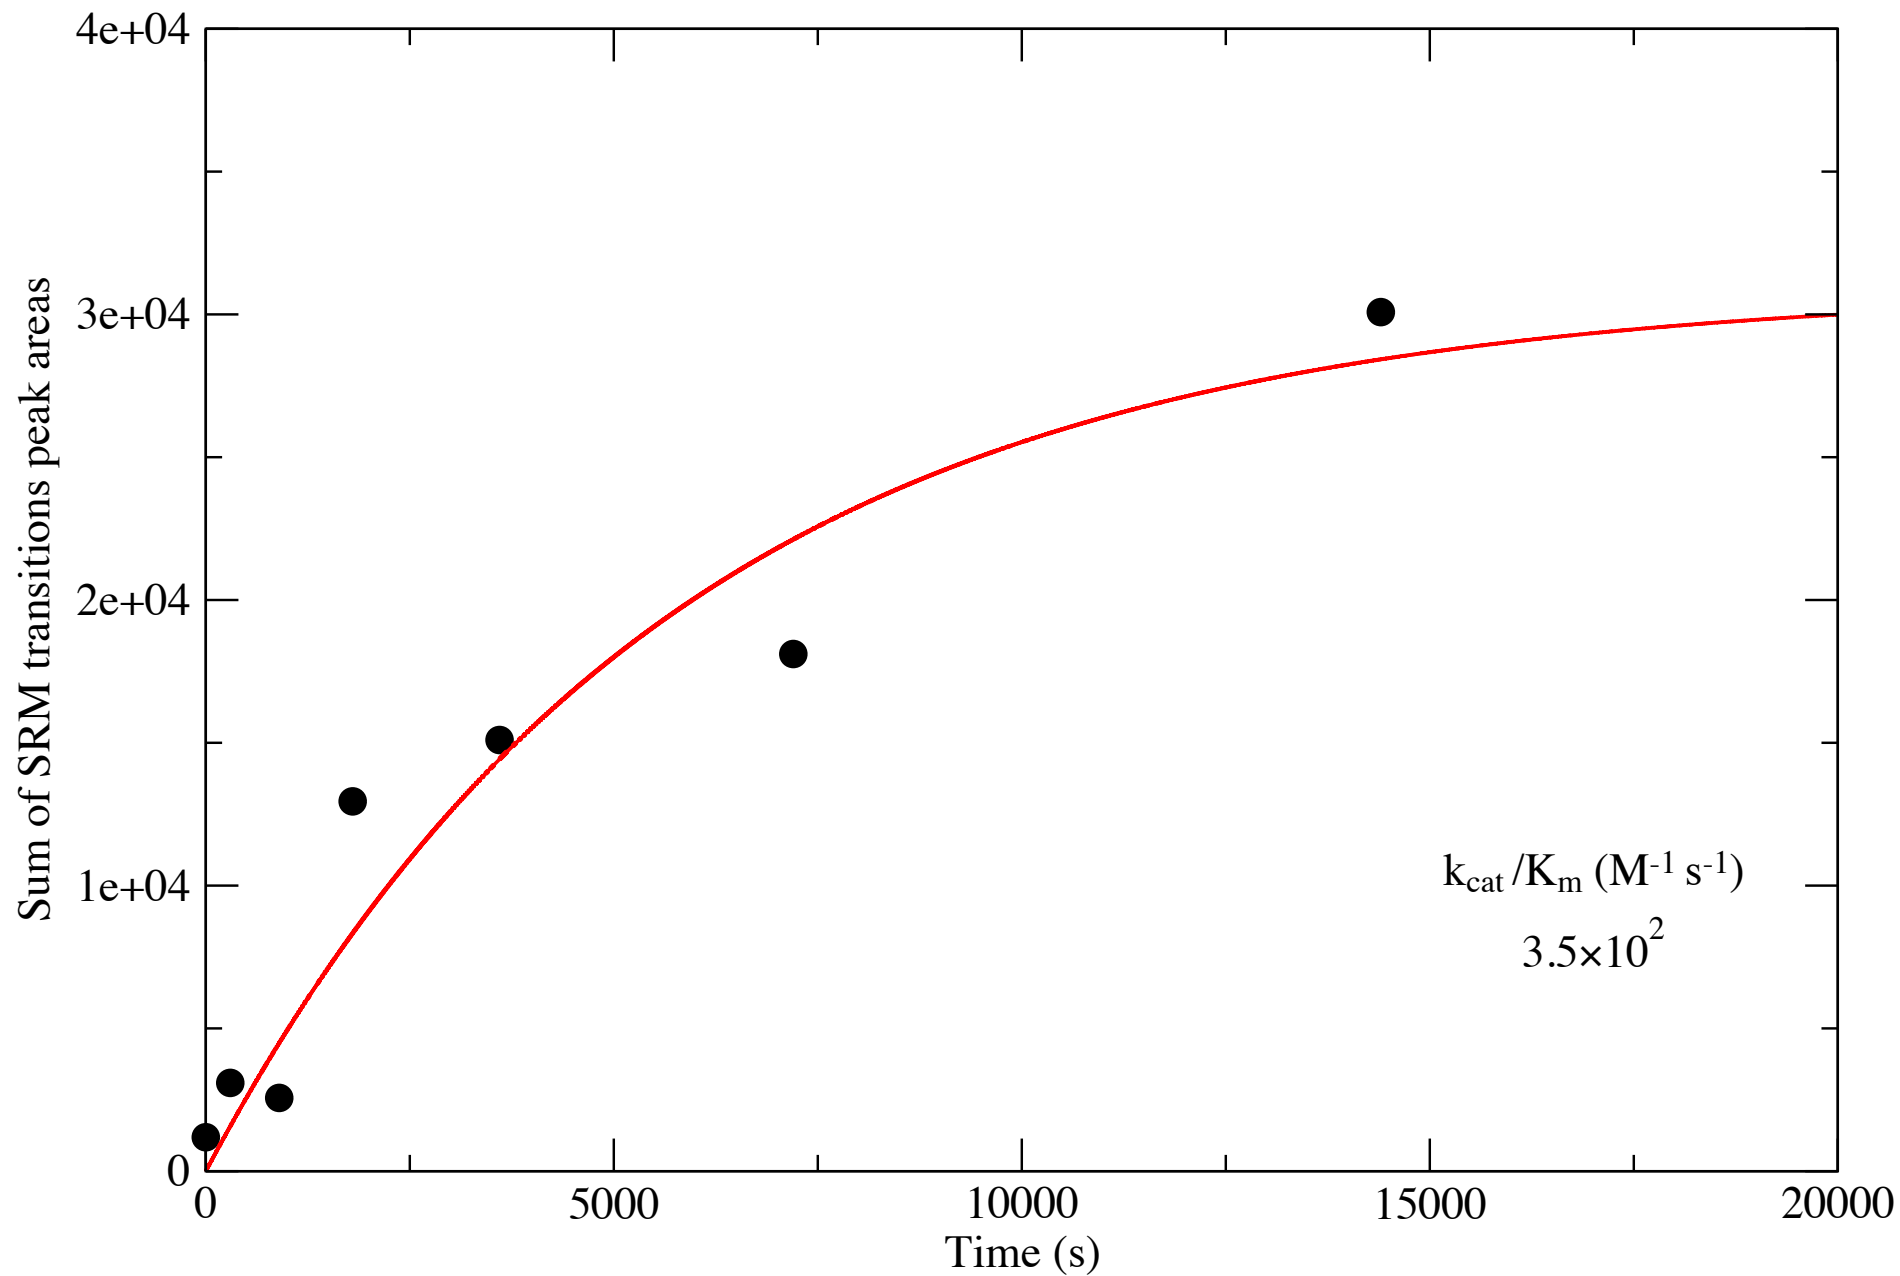

# CALU\_HUMAN (AFLGAEAAK)

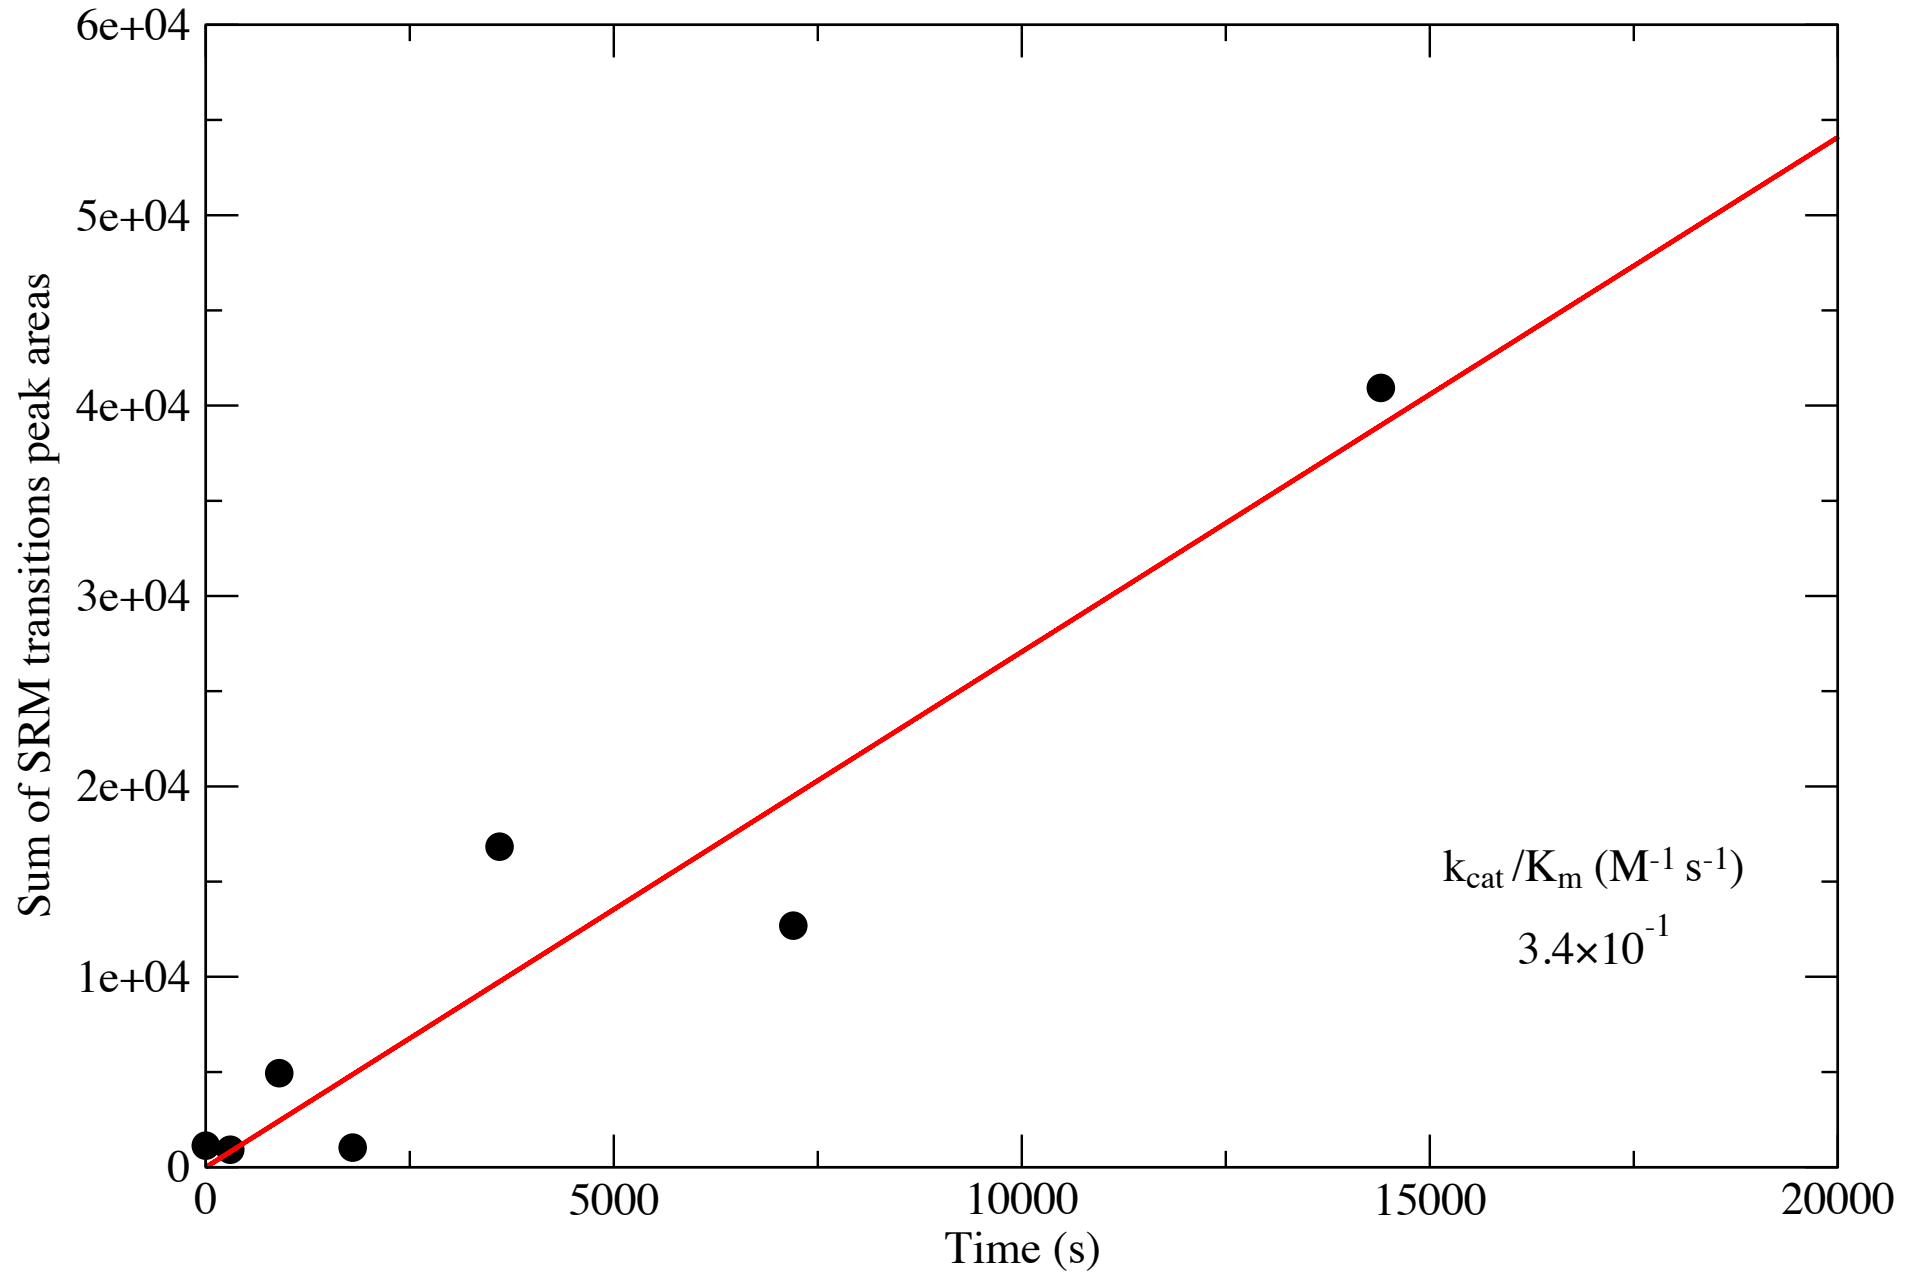

# CALX\_HUMAN (SKPDTTAPPSSPK)

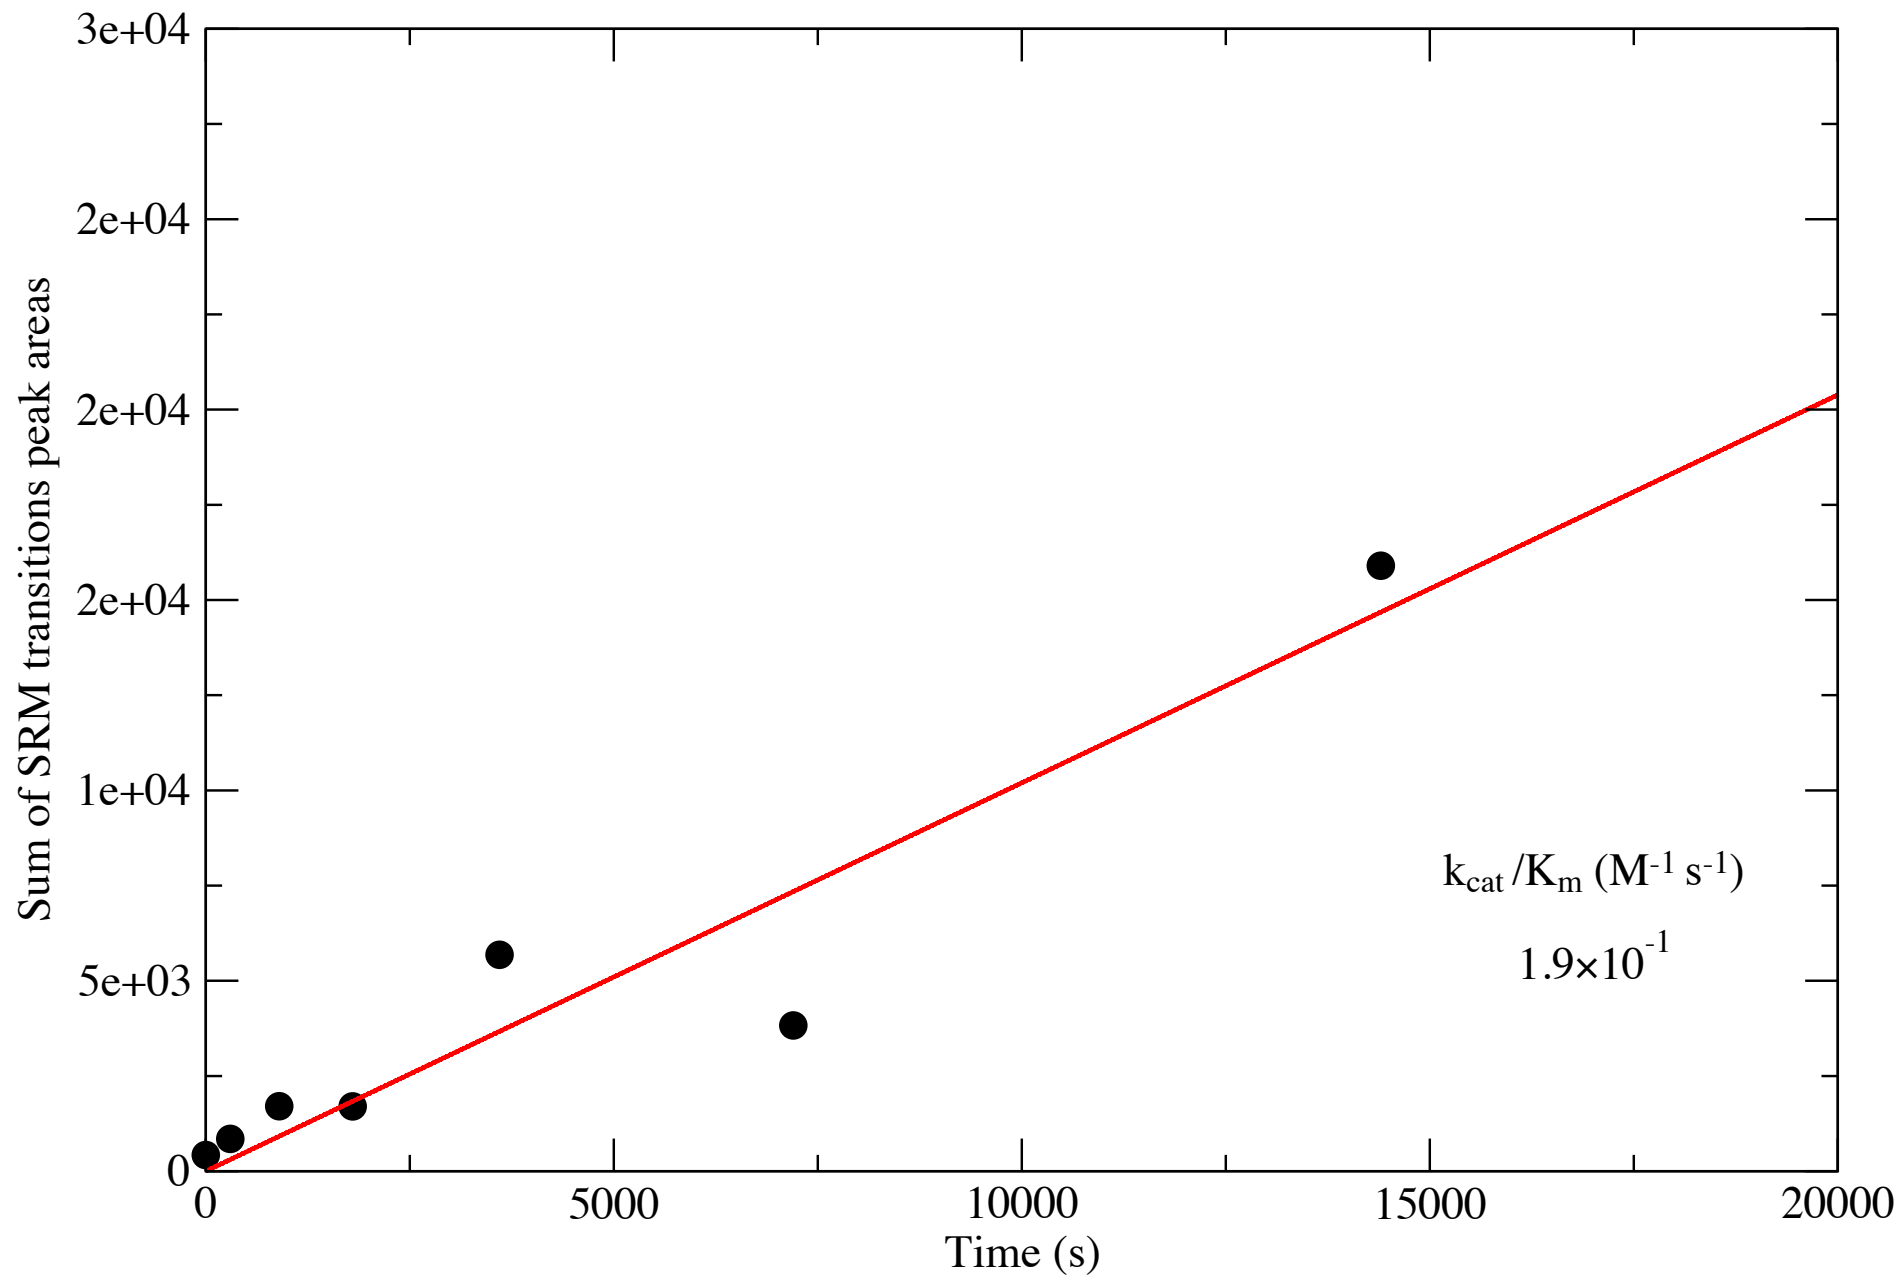



# CASP7\_HUMAN (SGPINDTDANPR)

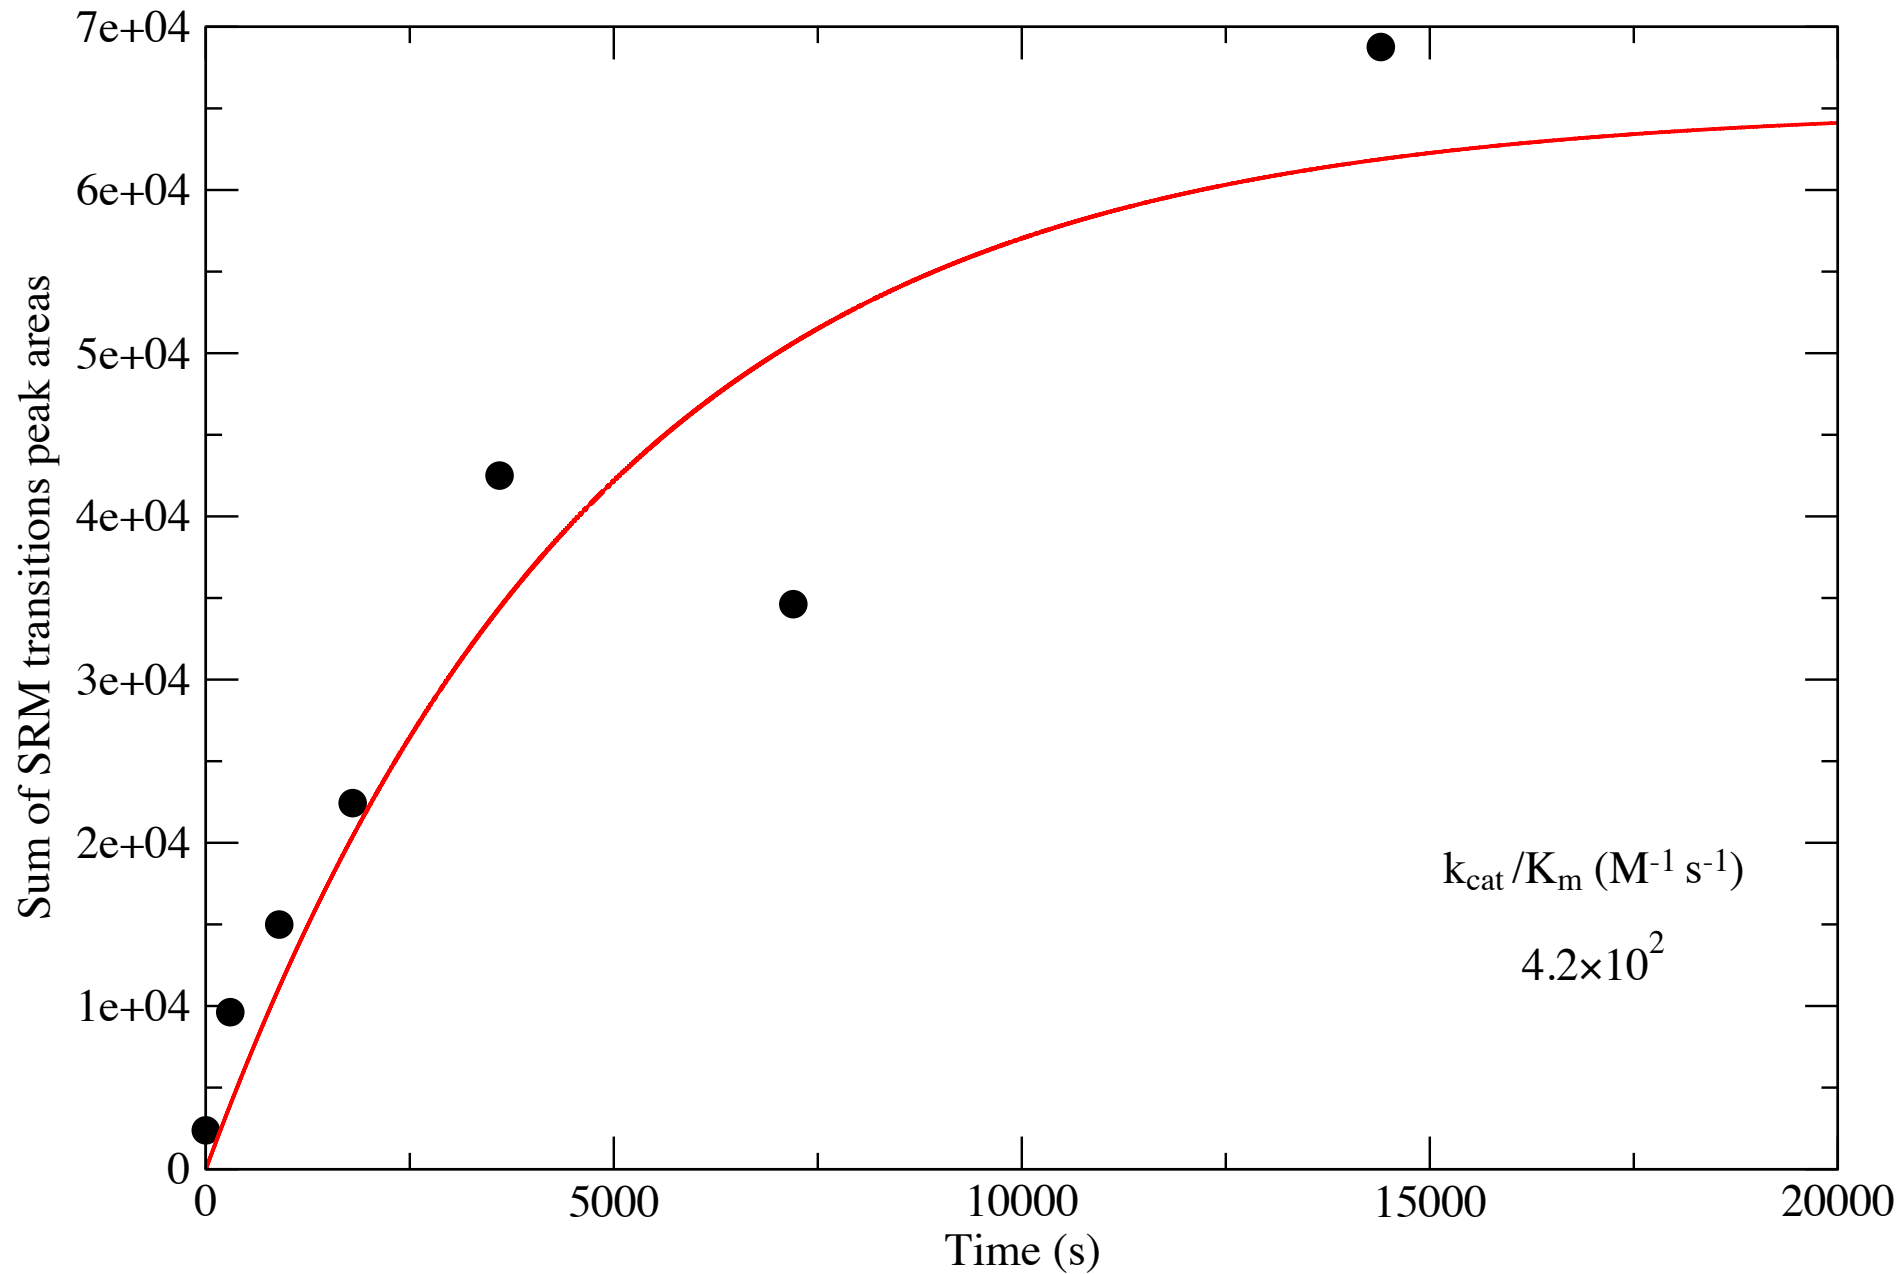

# CASP8\_HUMAN (SEEQPYLEMDLSSPQTR)

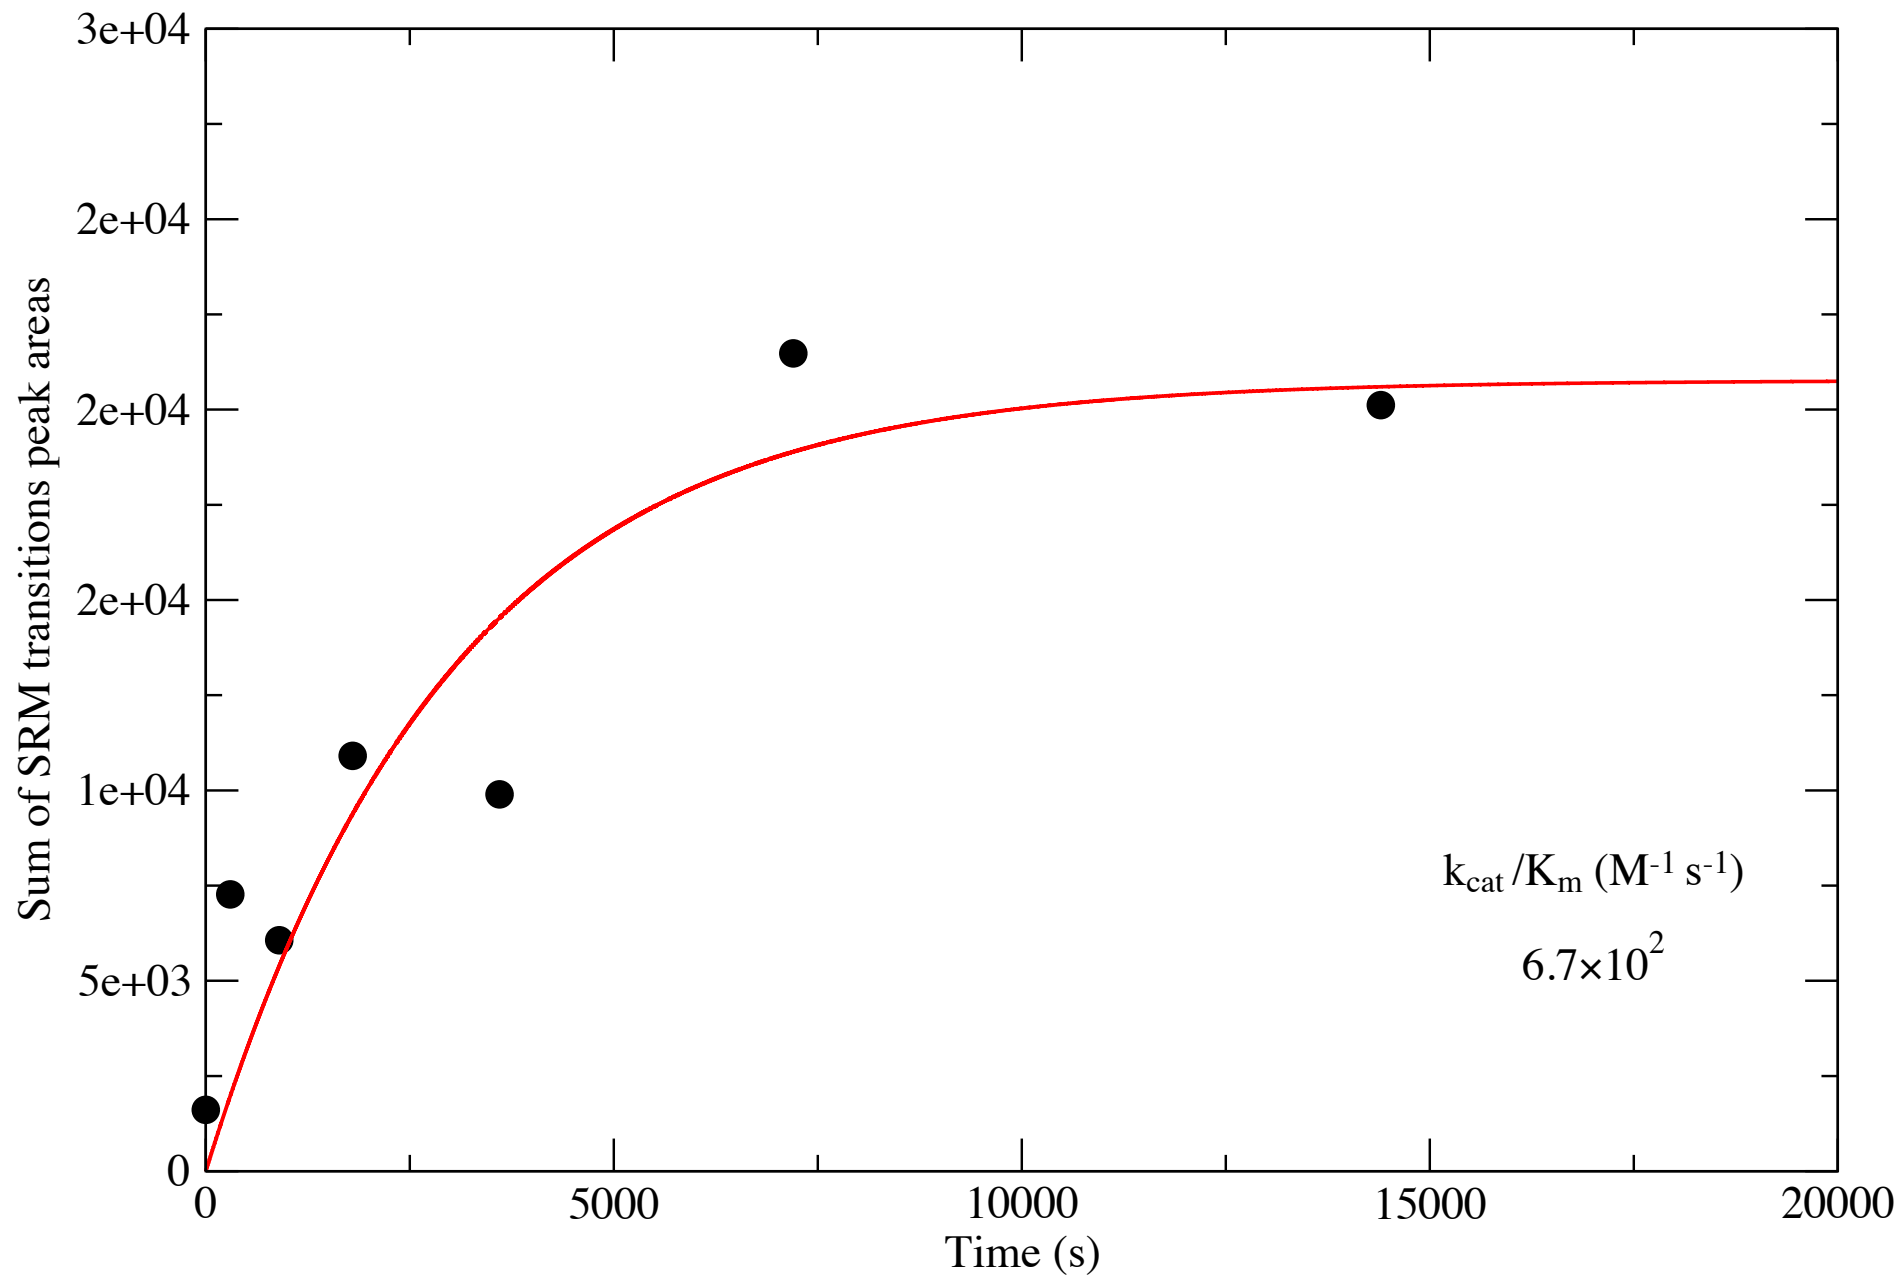

# CB044\_HUMAN (AEPVTQPASLPR)

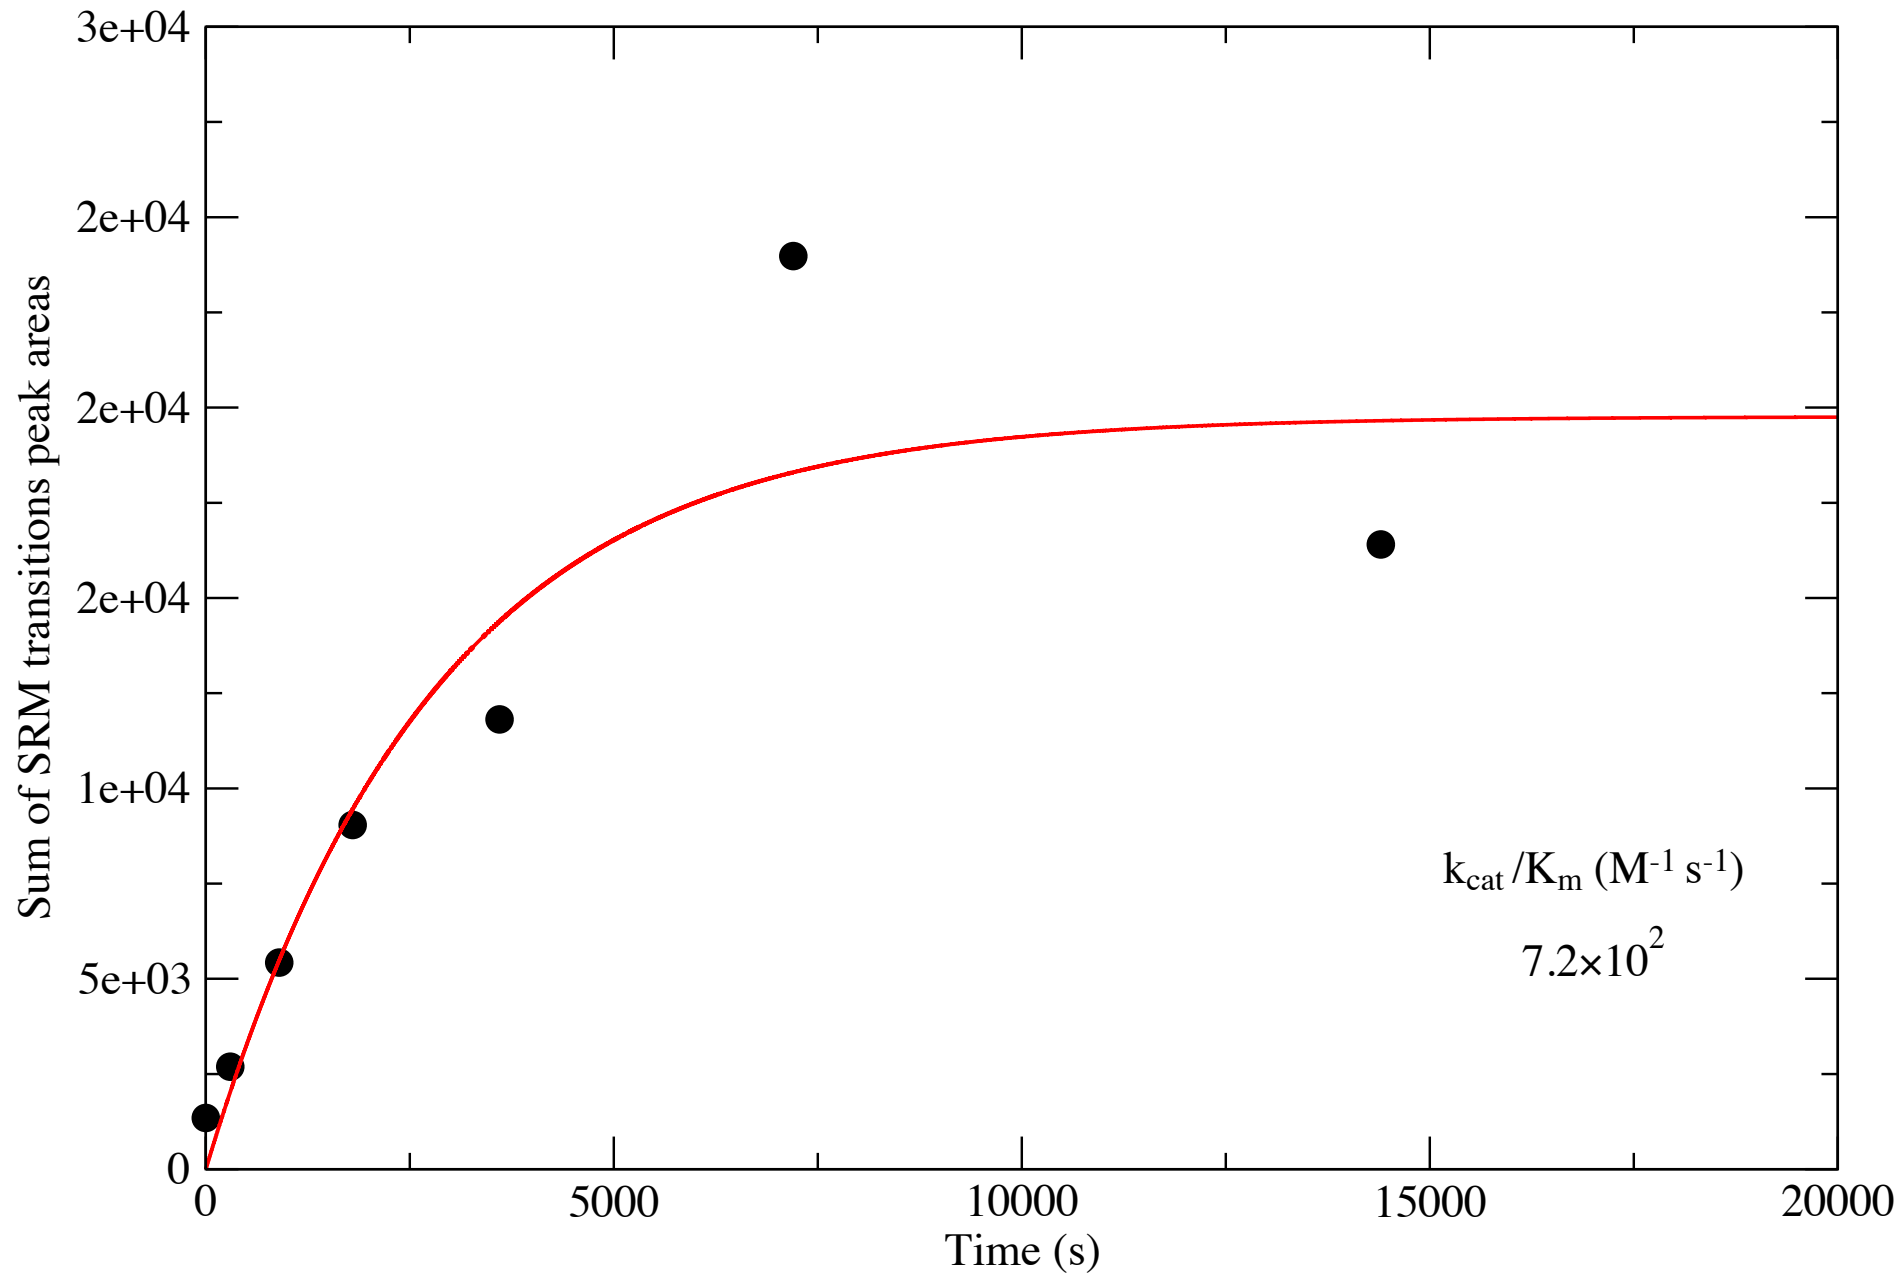

# CC50A\_HUMAN (GGPPCAPGGTAK)

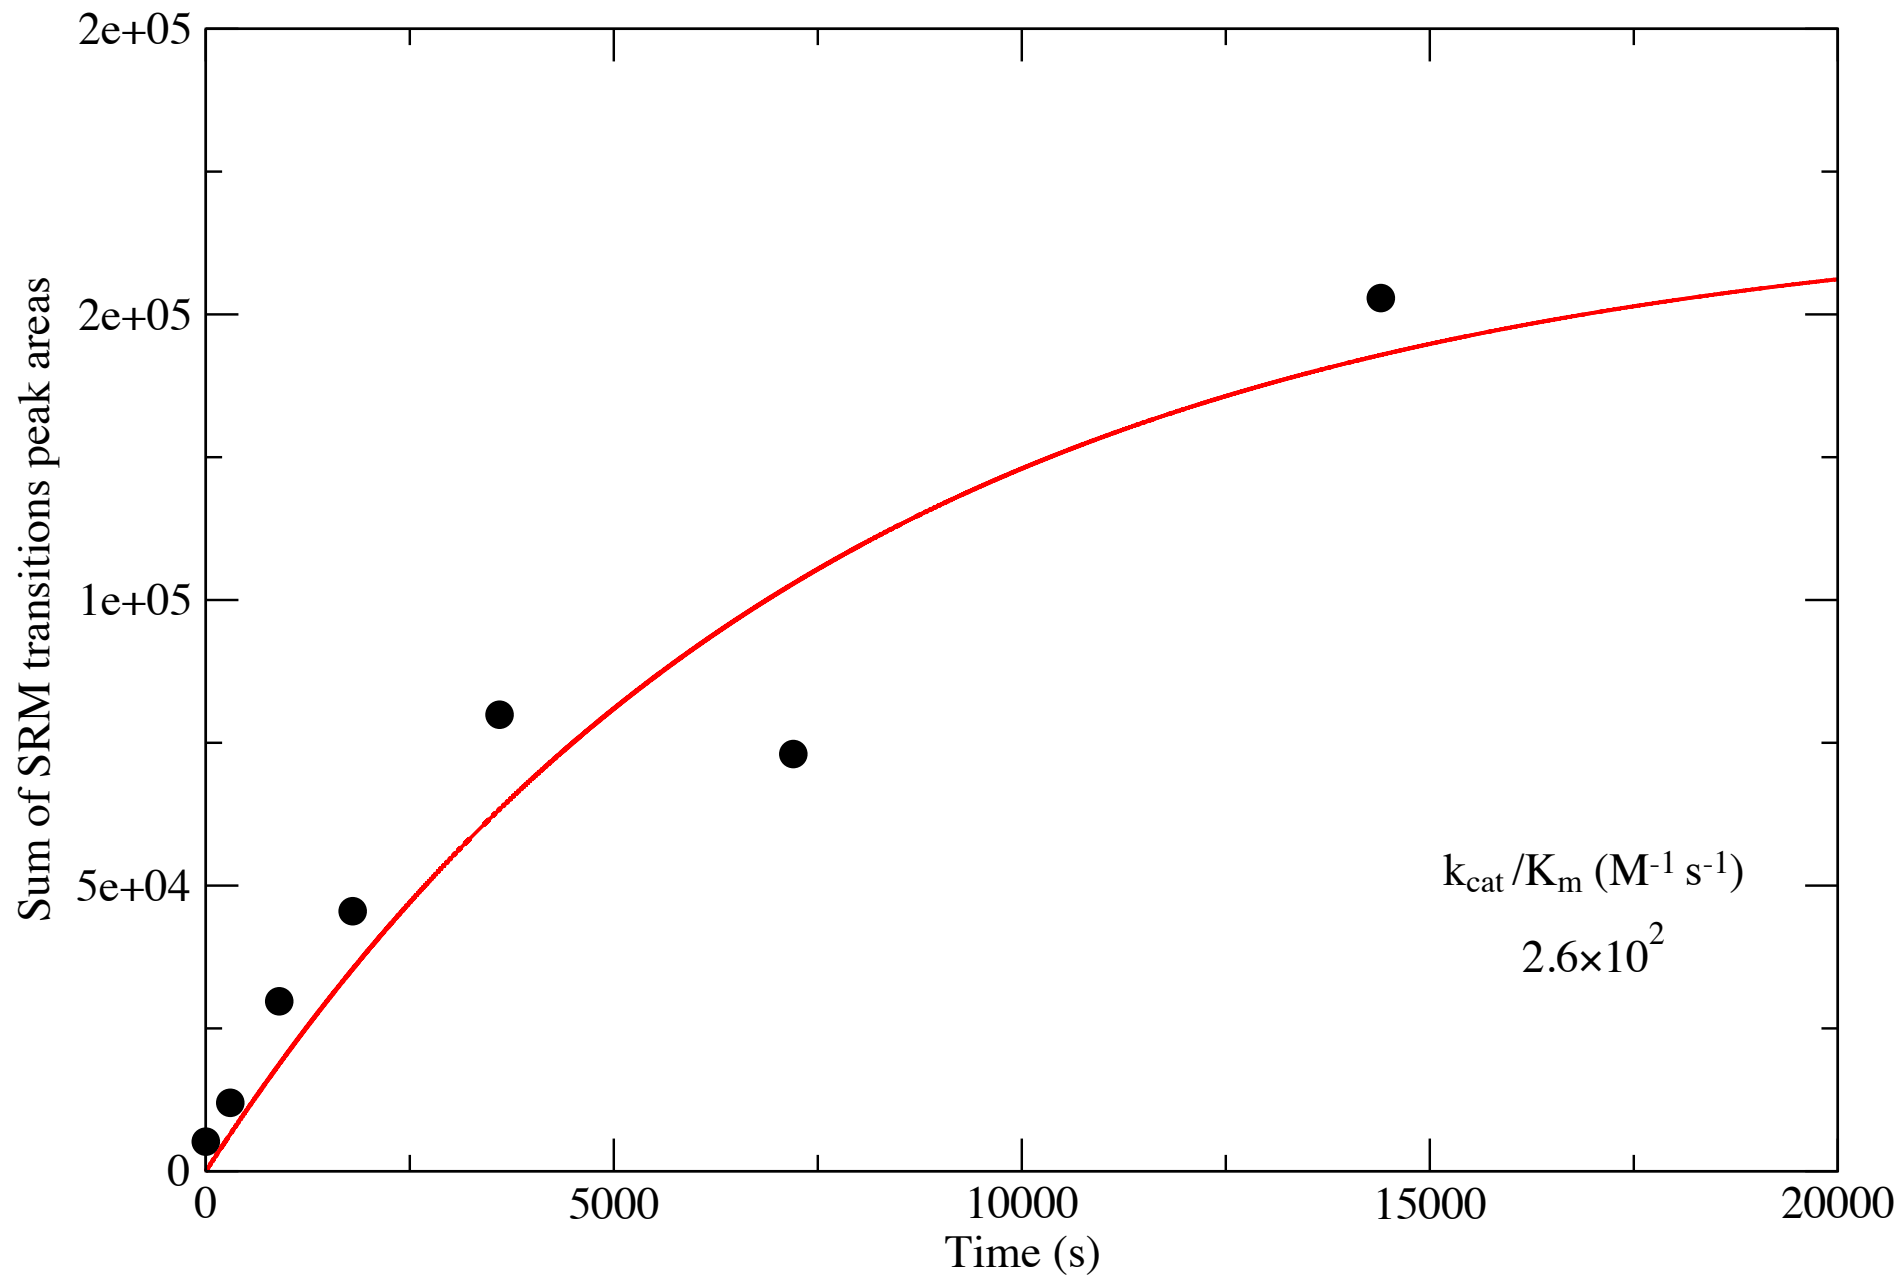

# CCNL2\_HUMAN (GTSGFSPAPK)

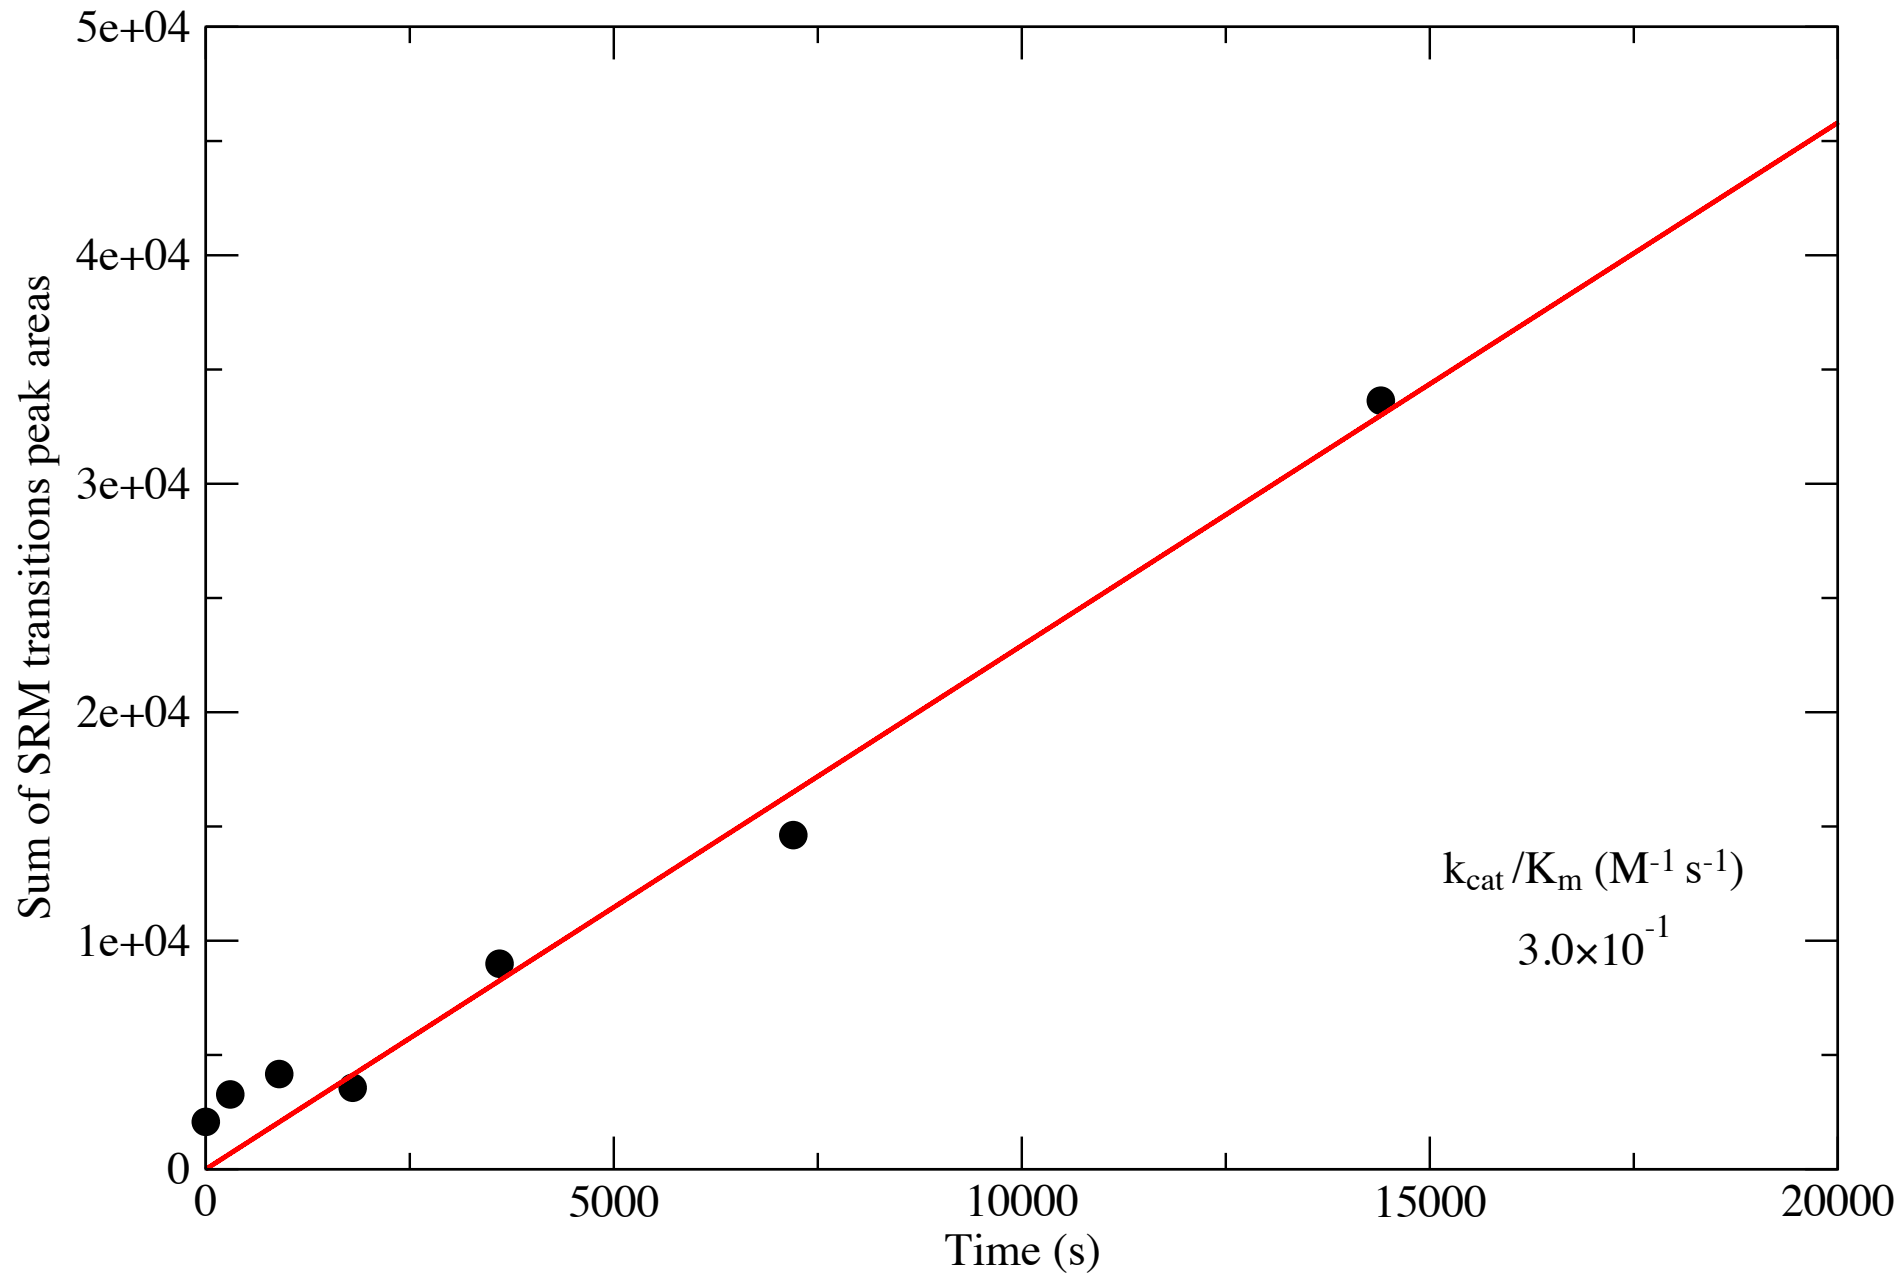

# CD11B\_HUMAN (YVPDSPALSPIELK)

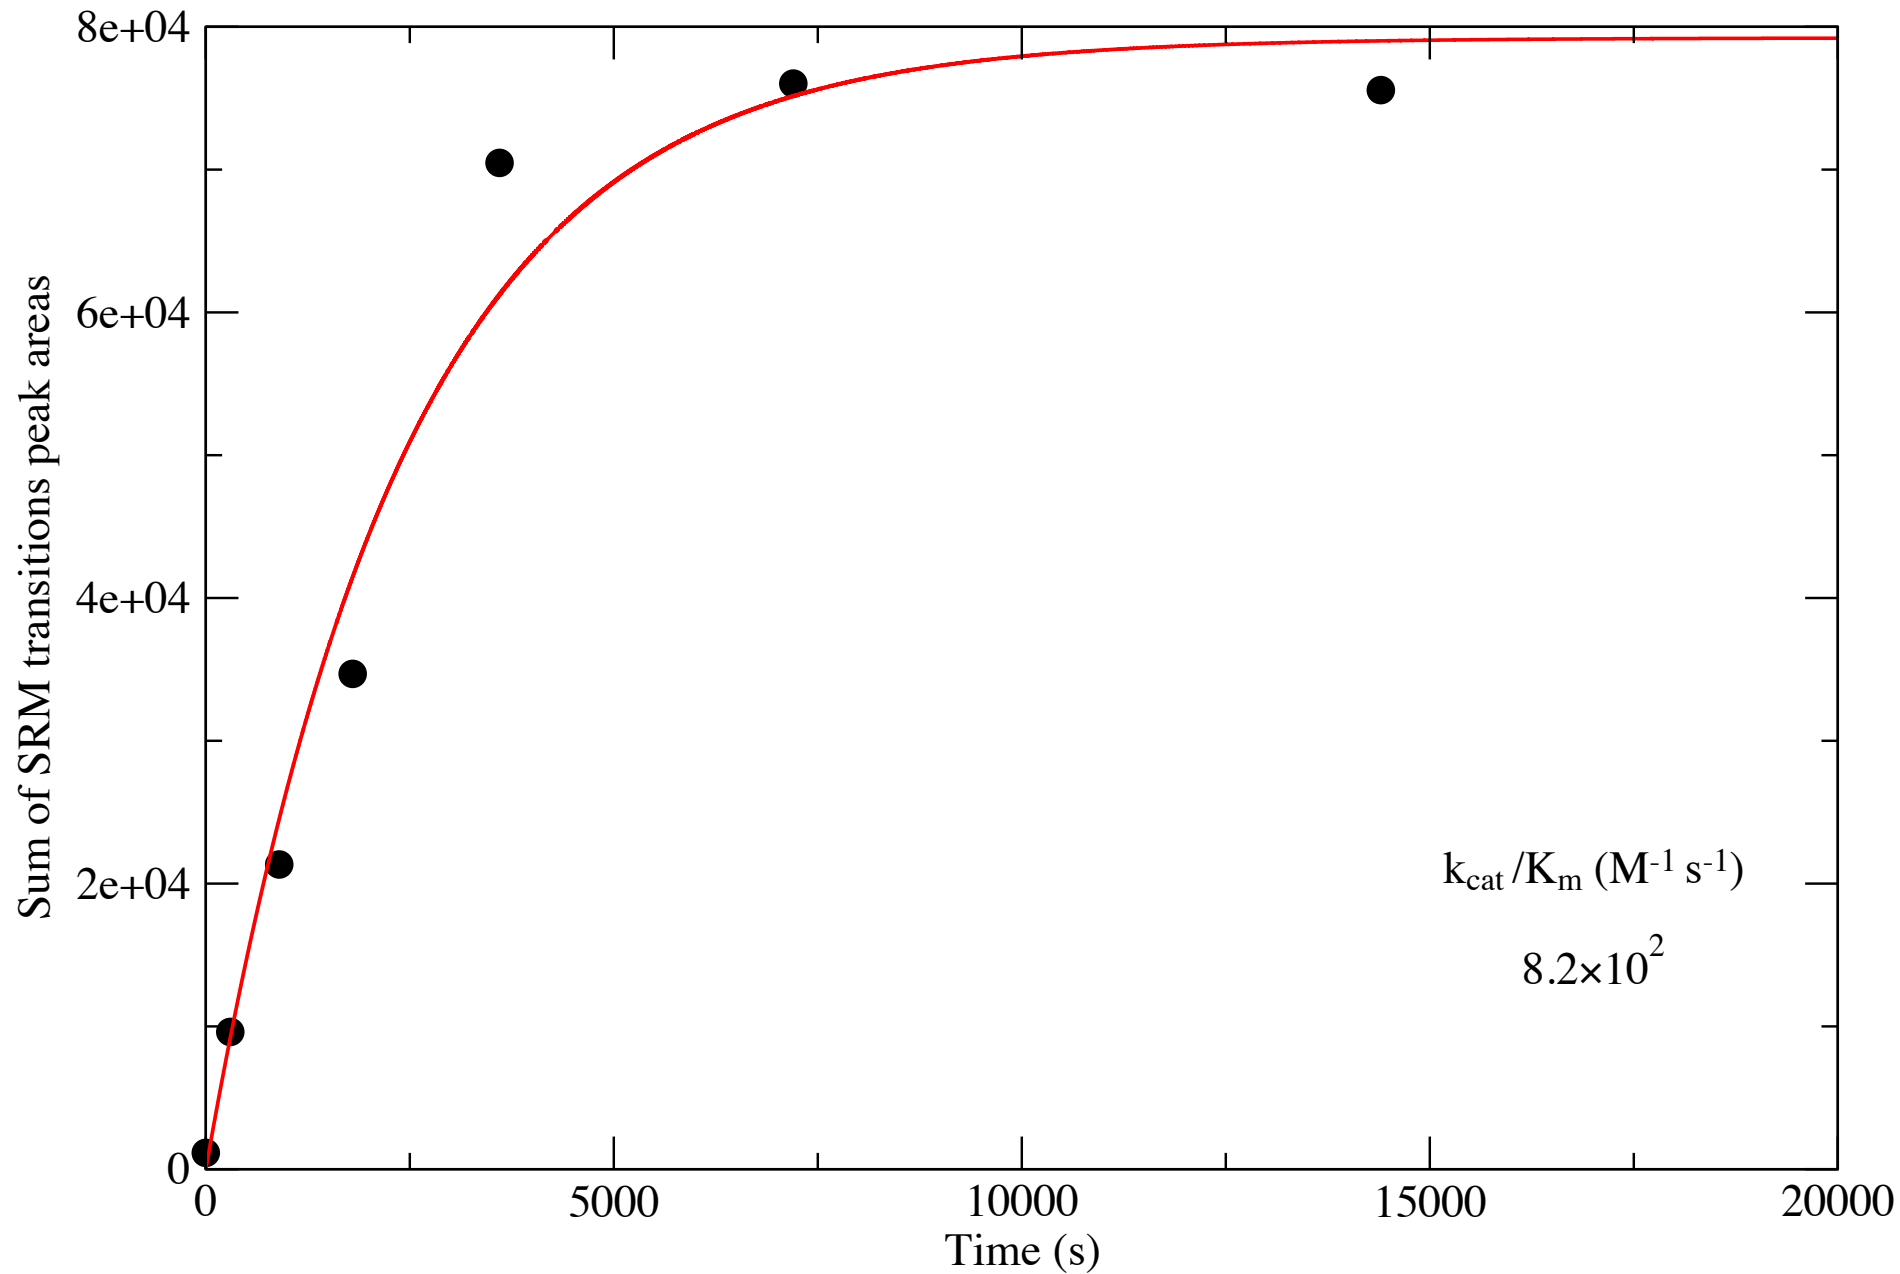

# CDC5L\_HUMAN (FSGVTPQR)

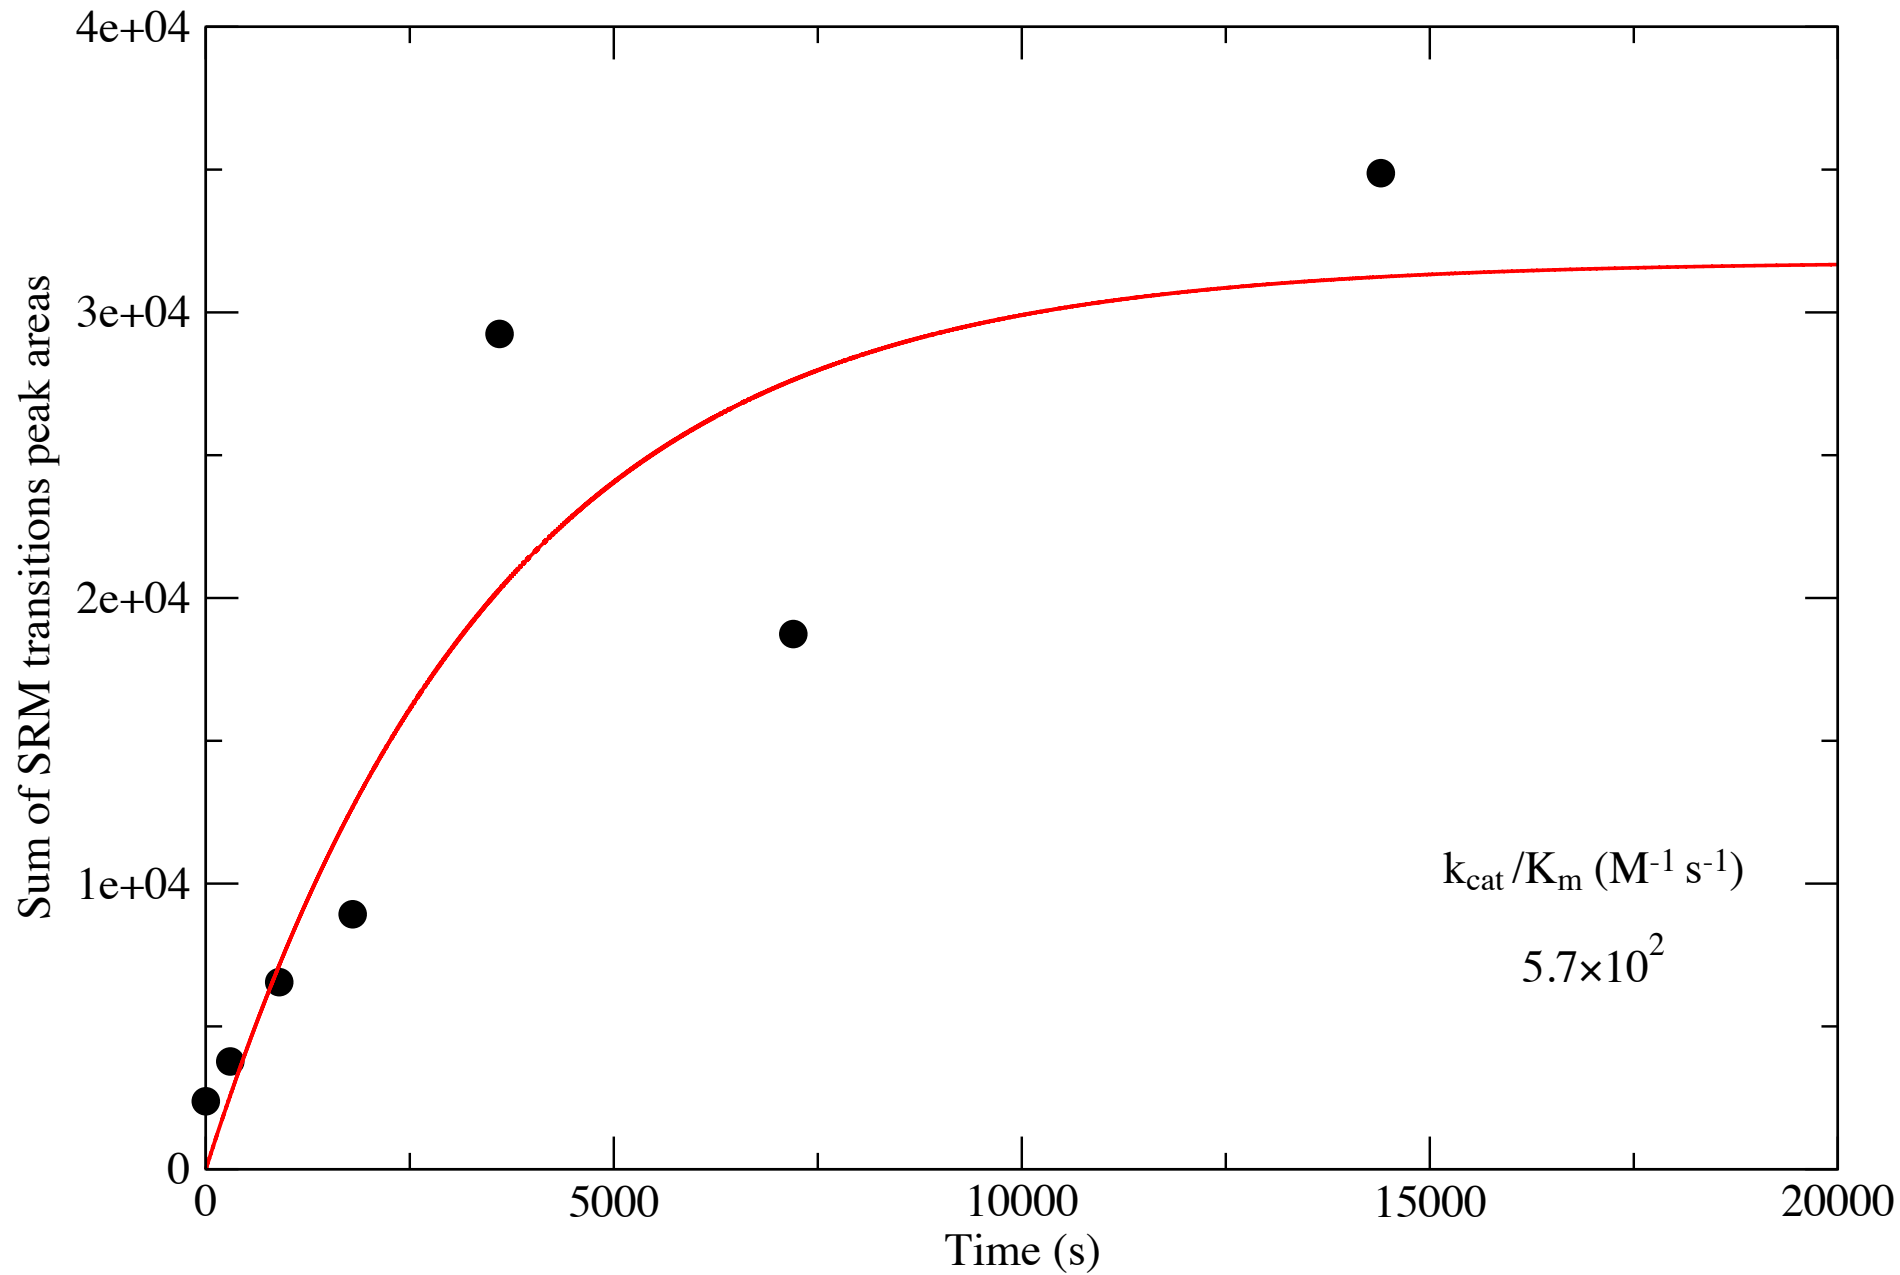

# CDCA2\_HUMAN (AVPDVR)

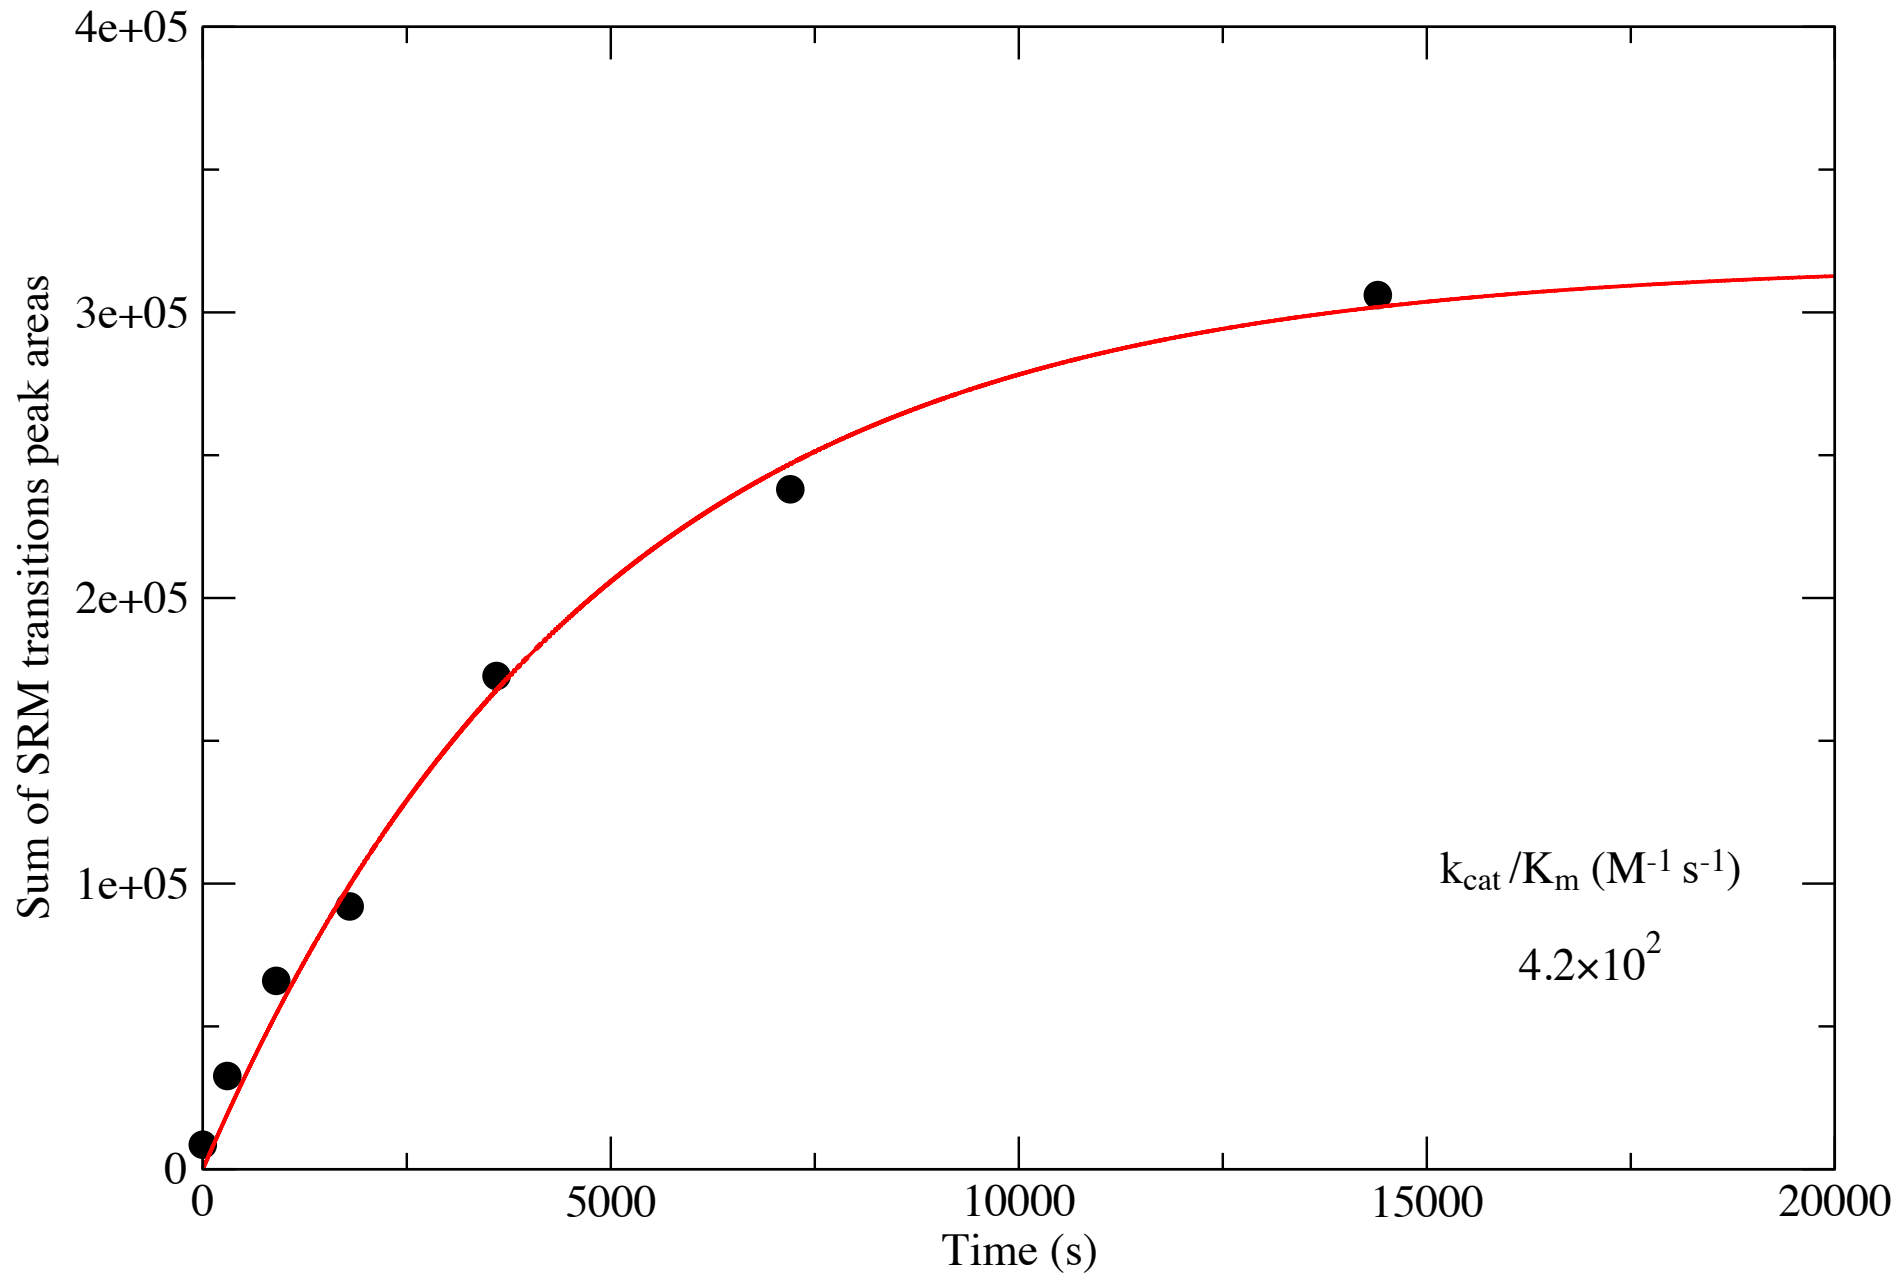



# CDK13\_HUMAN (GLGSSSAPPLER)

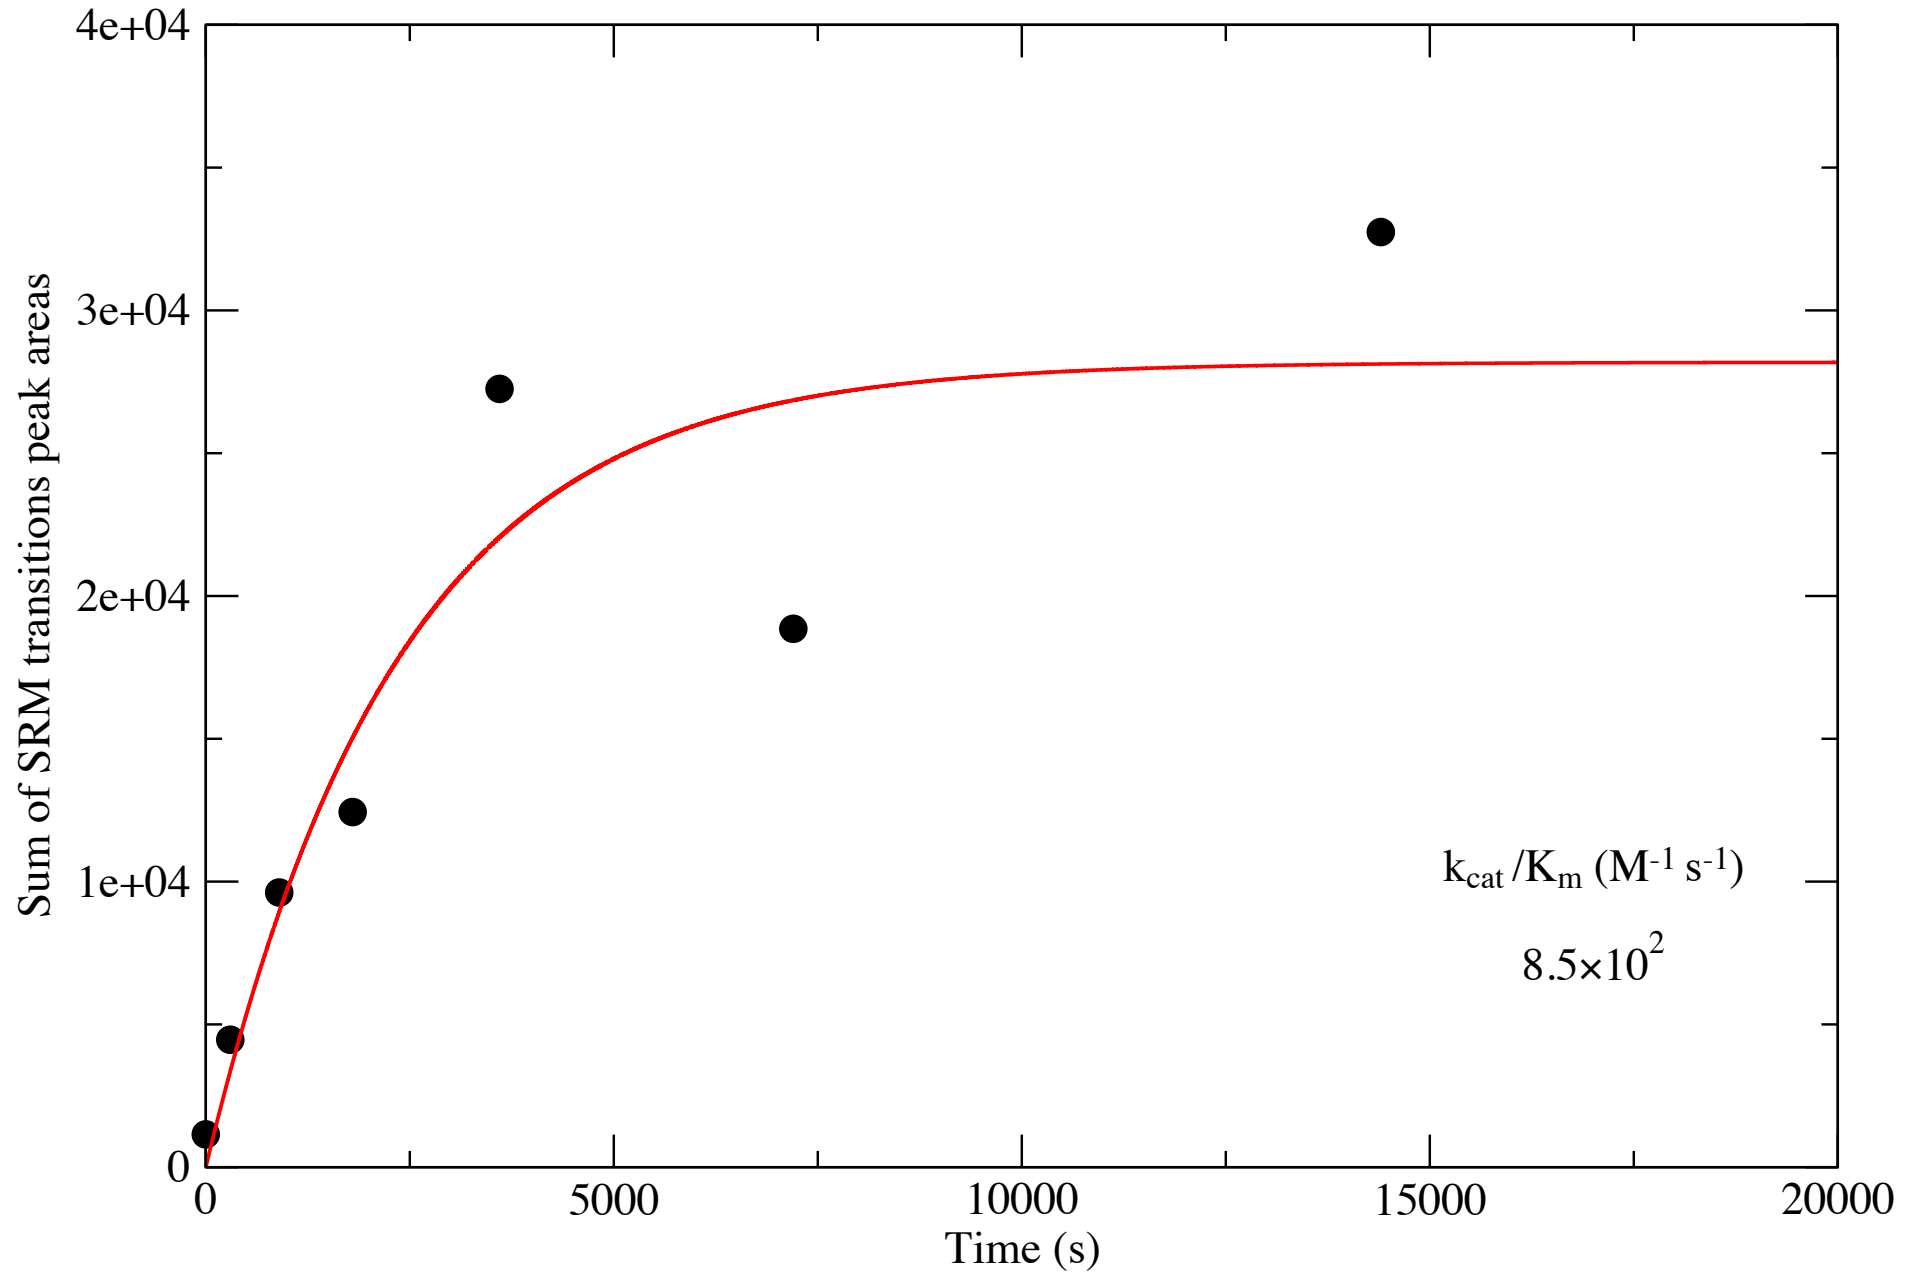

# CE170\_HUMAN (SVTSSGTAPSTTVSTAATTPGSAIDTR)

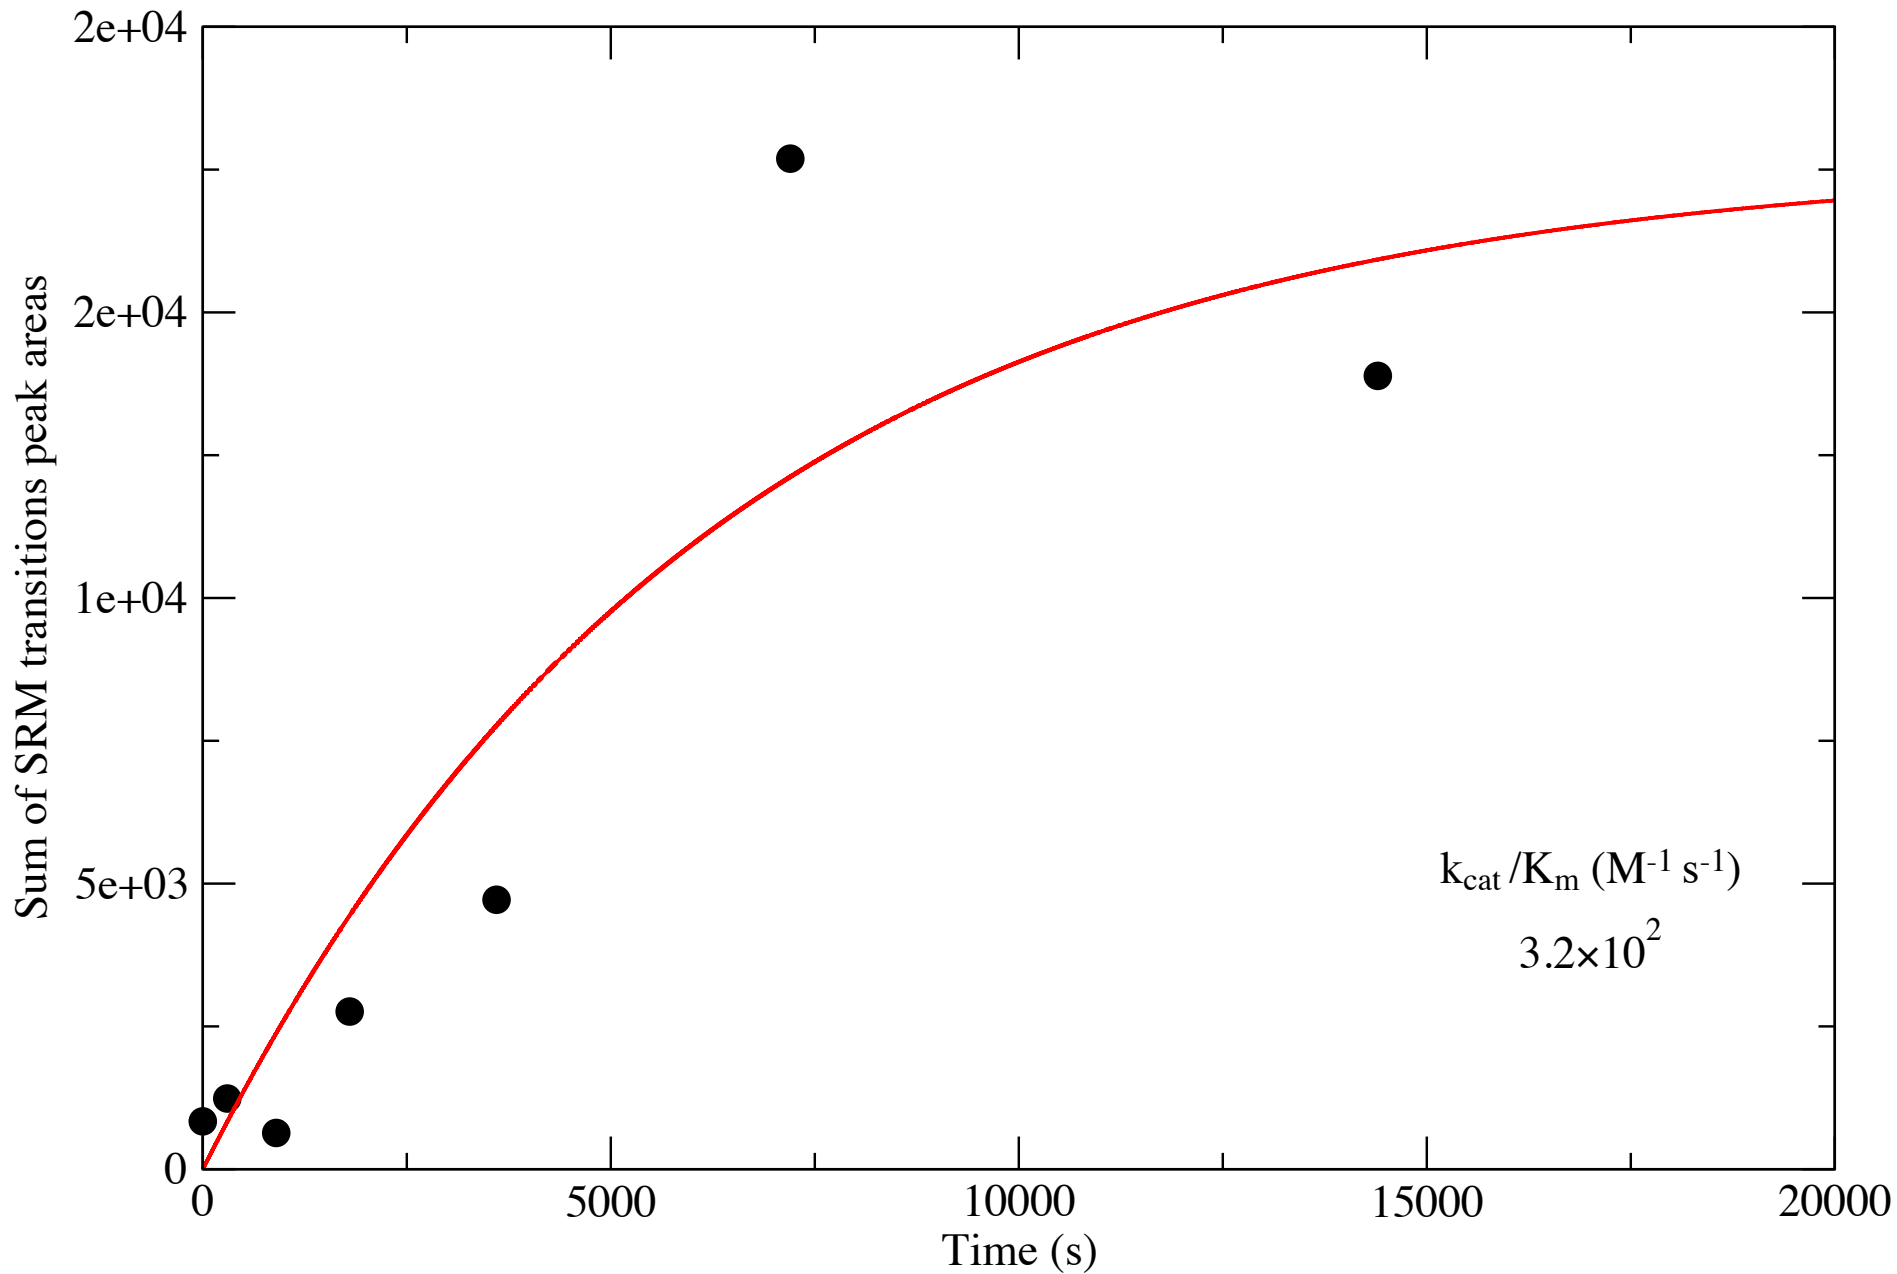

# CEBPZ\_HUMAN (GGTFMDVLDDDESESVPELEVHSK)

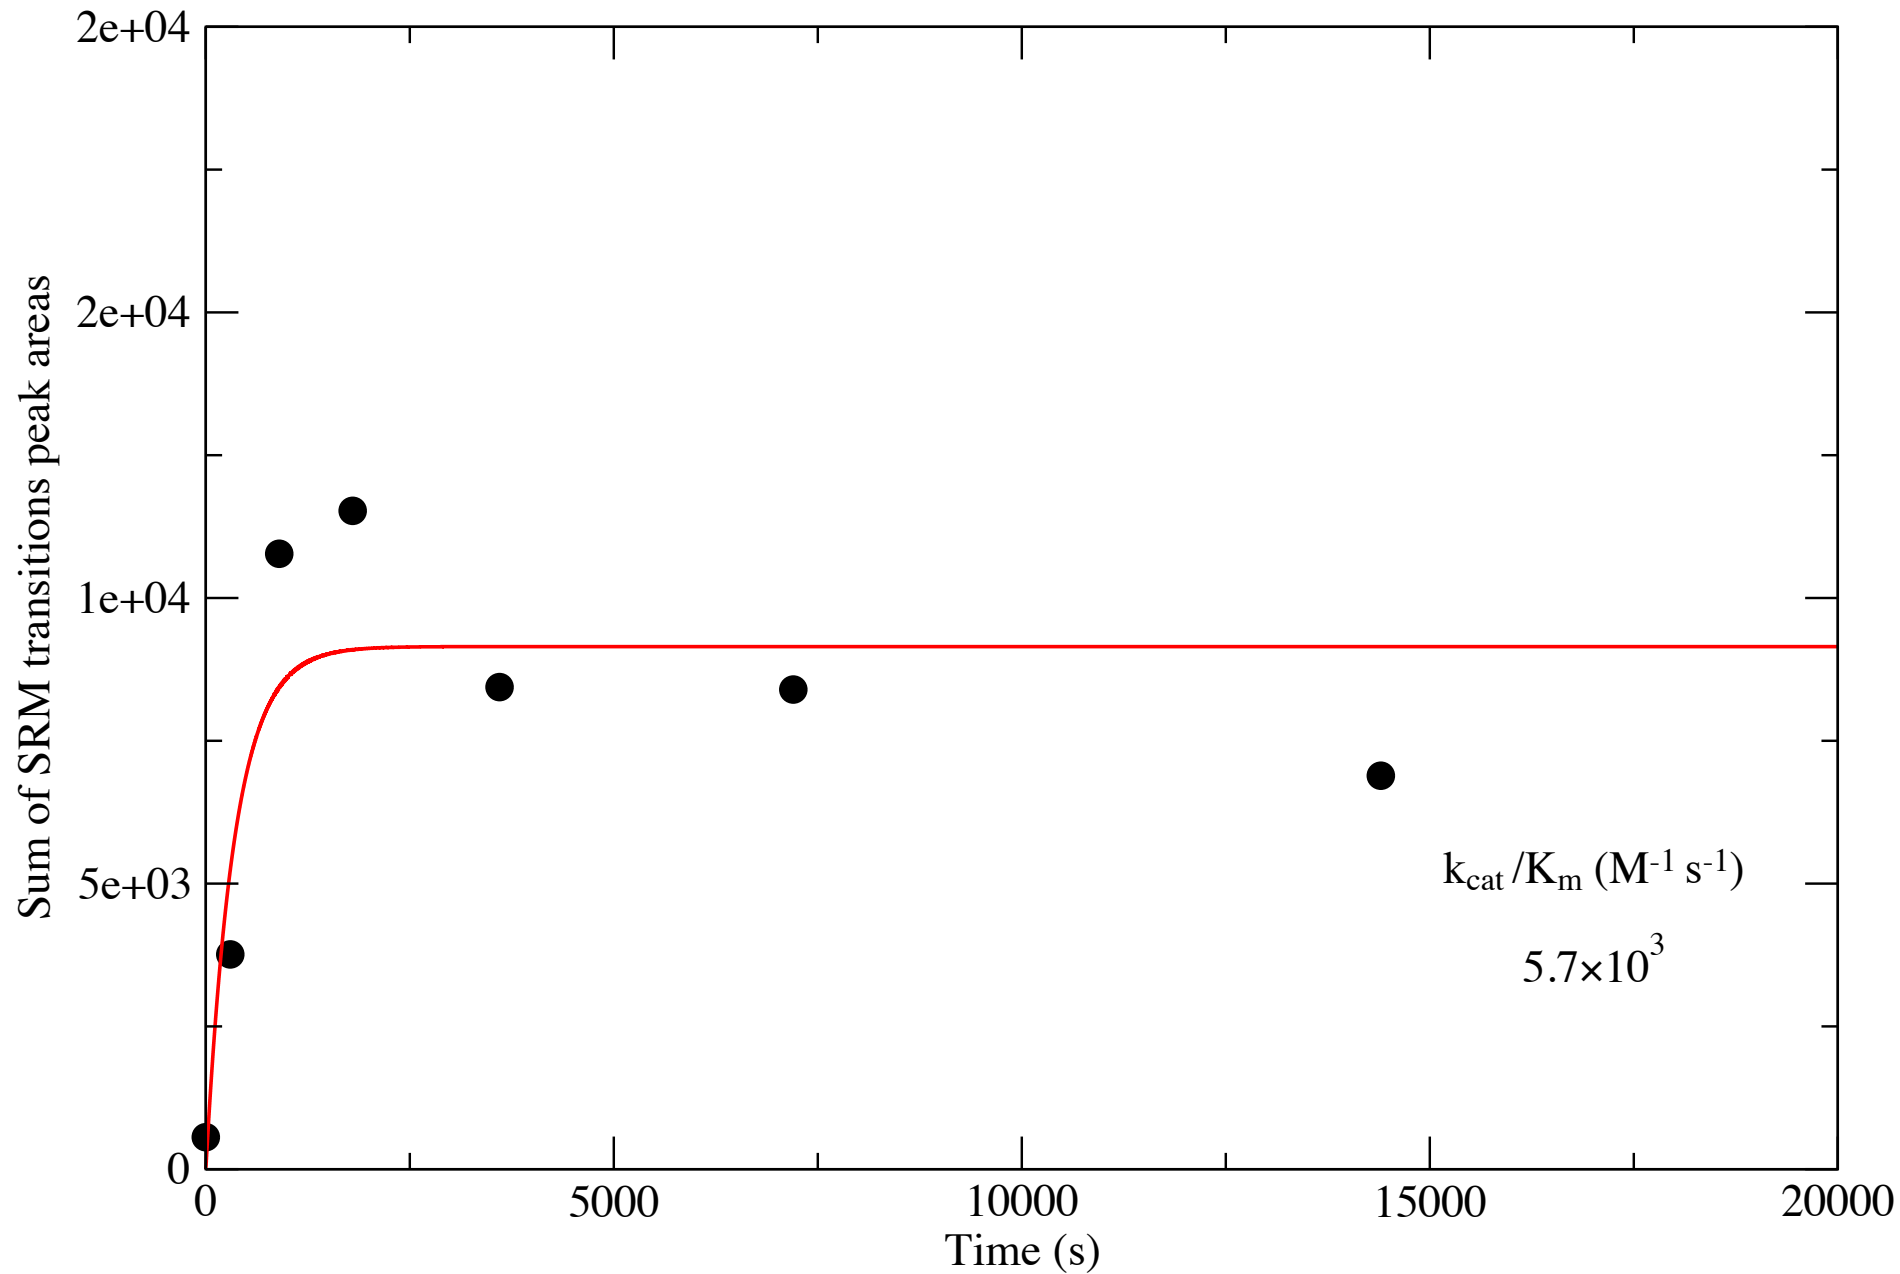

# CEP41\_HUMAN (SAASDPDAETAR)

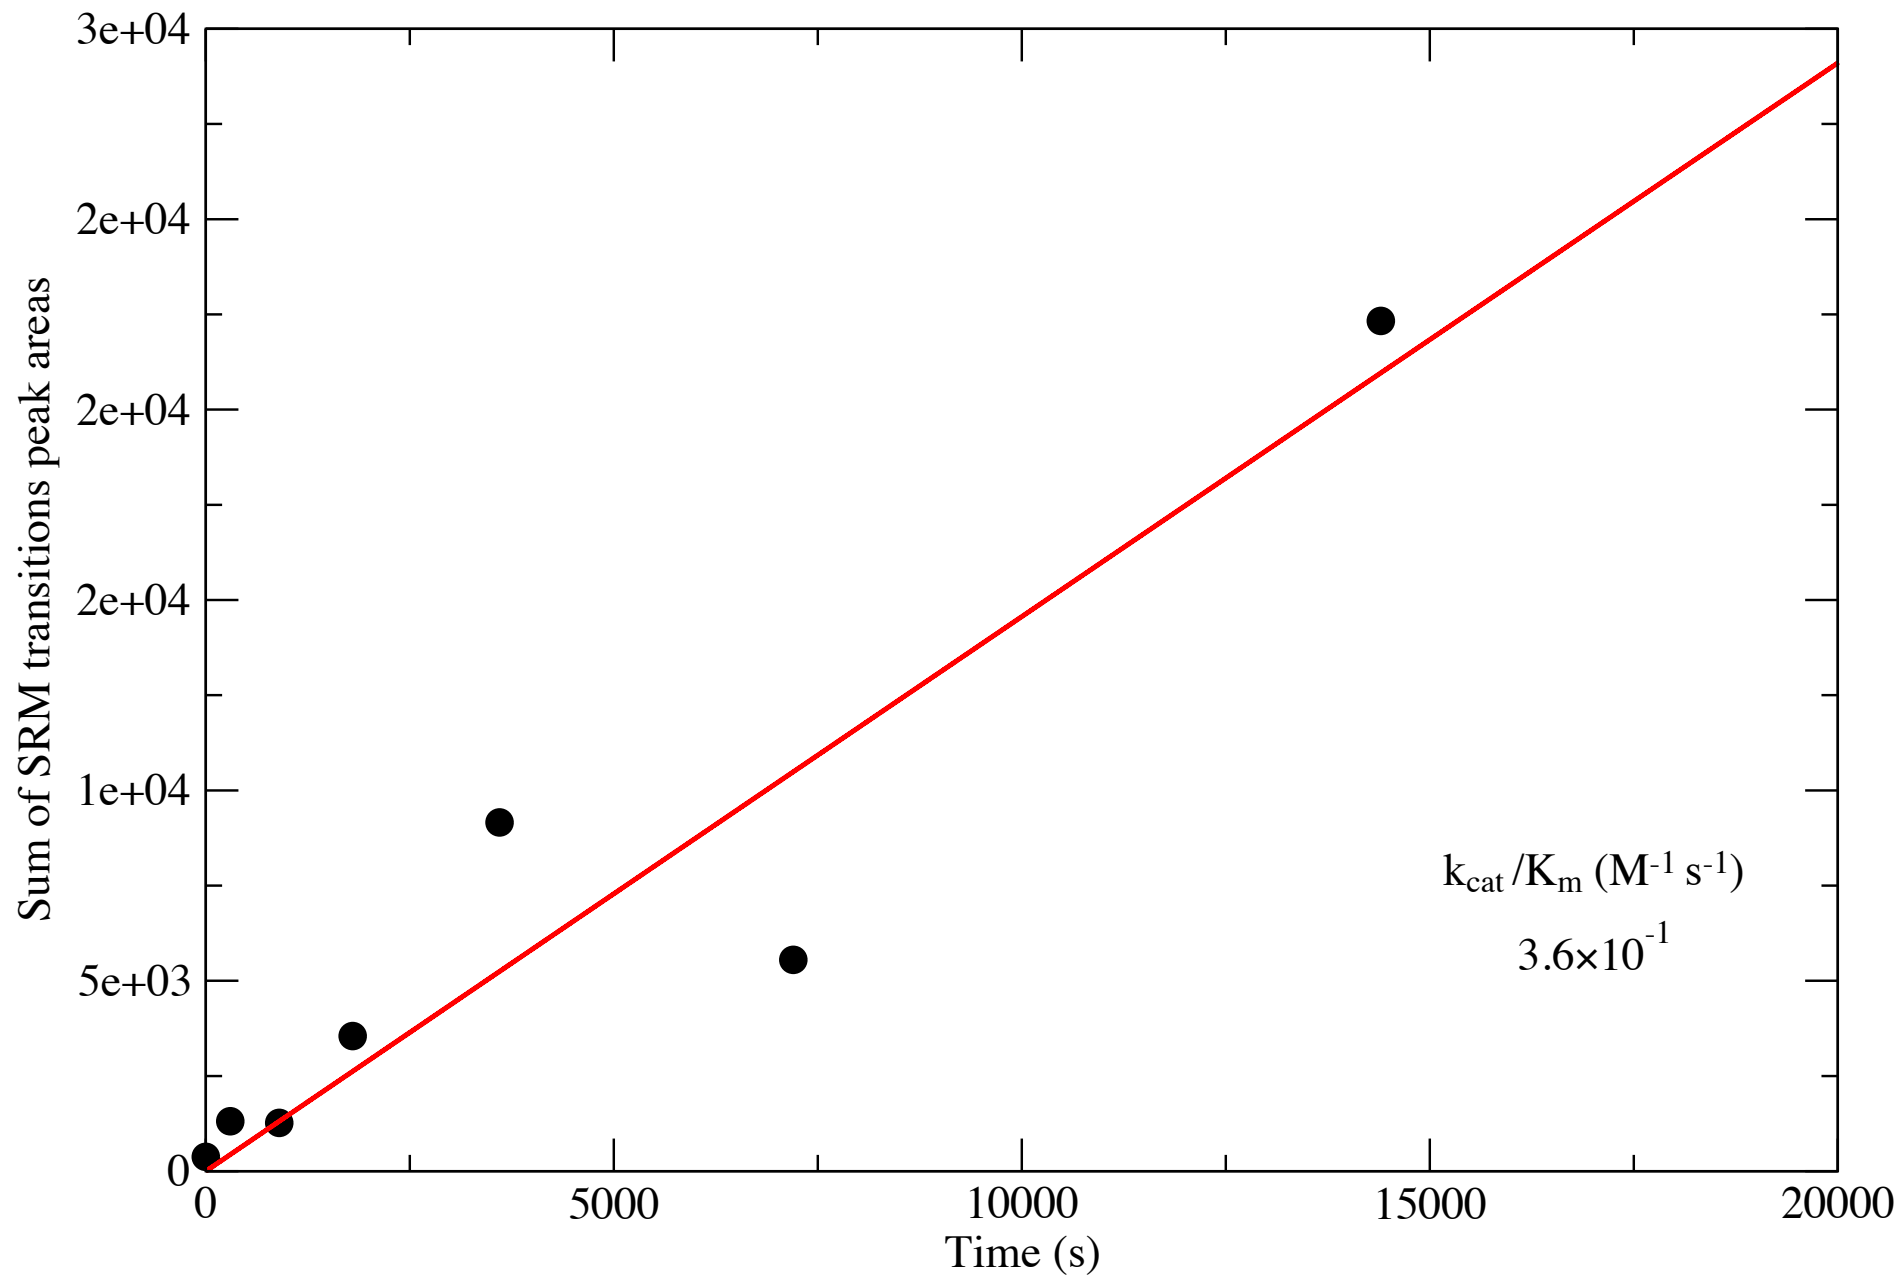

# CH60\_HUMAN (AMAGDFVNMVEK)

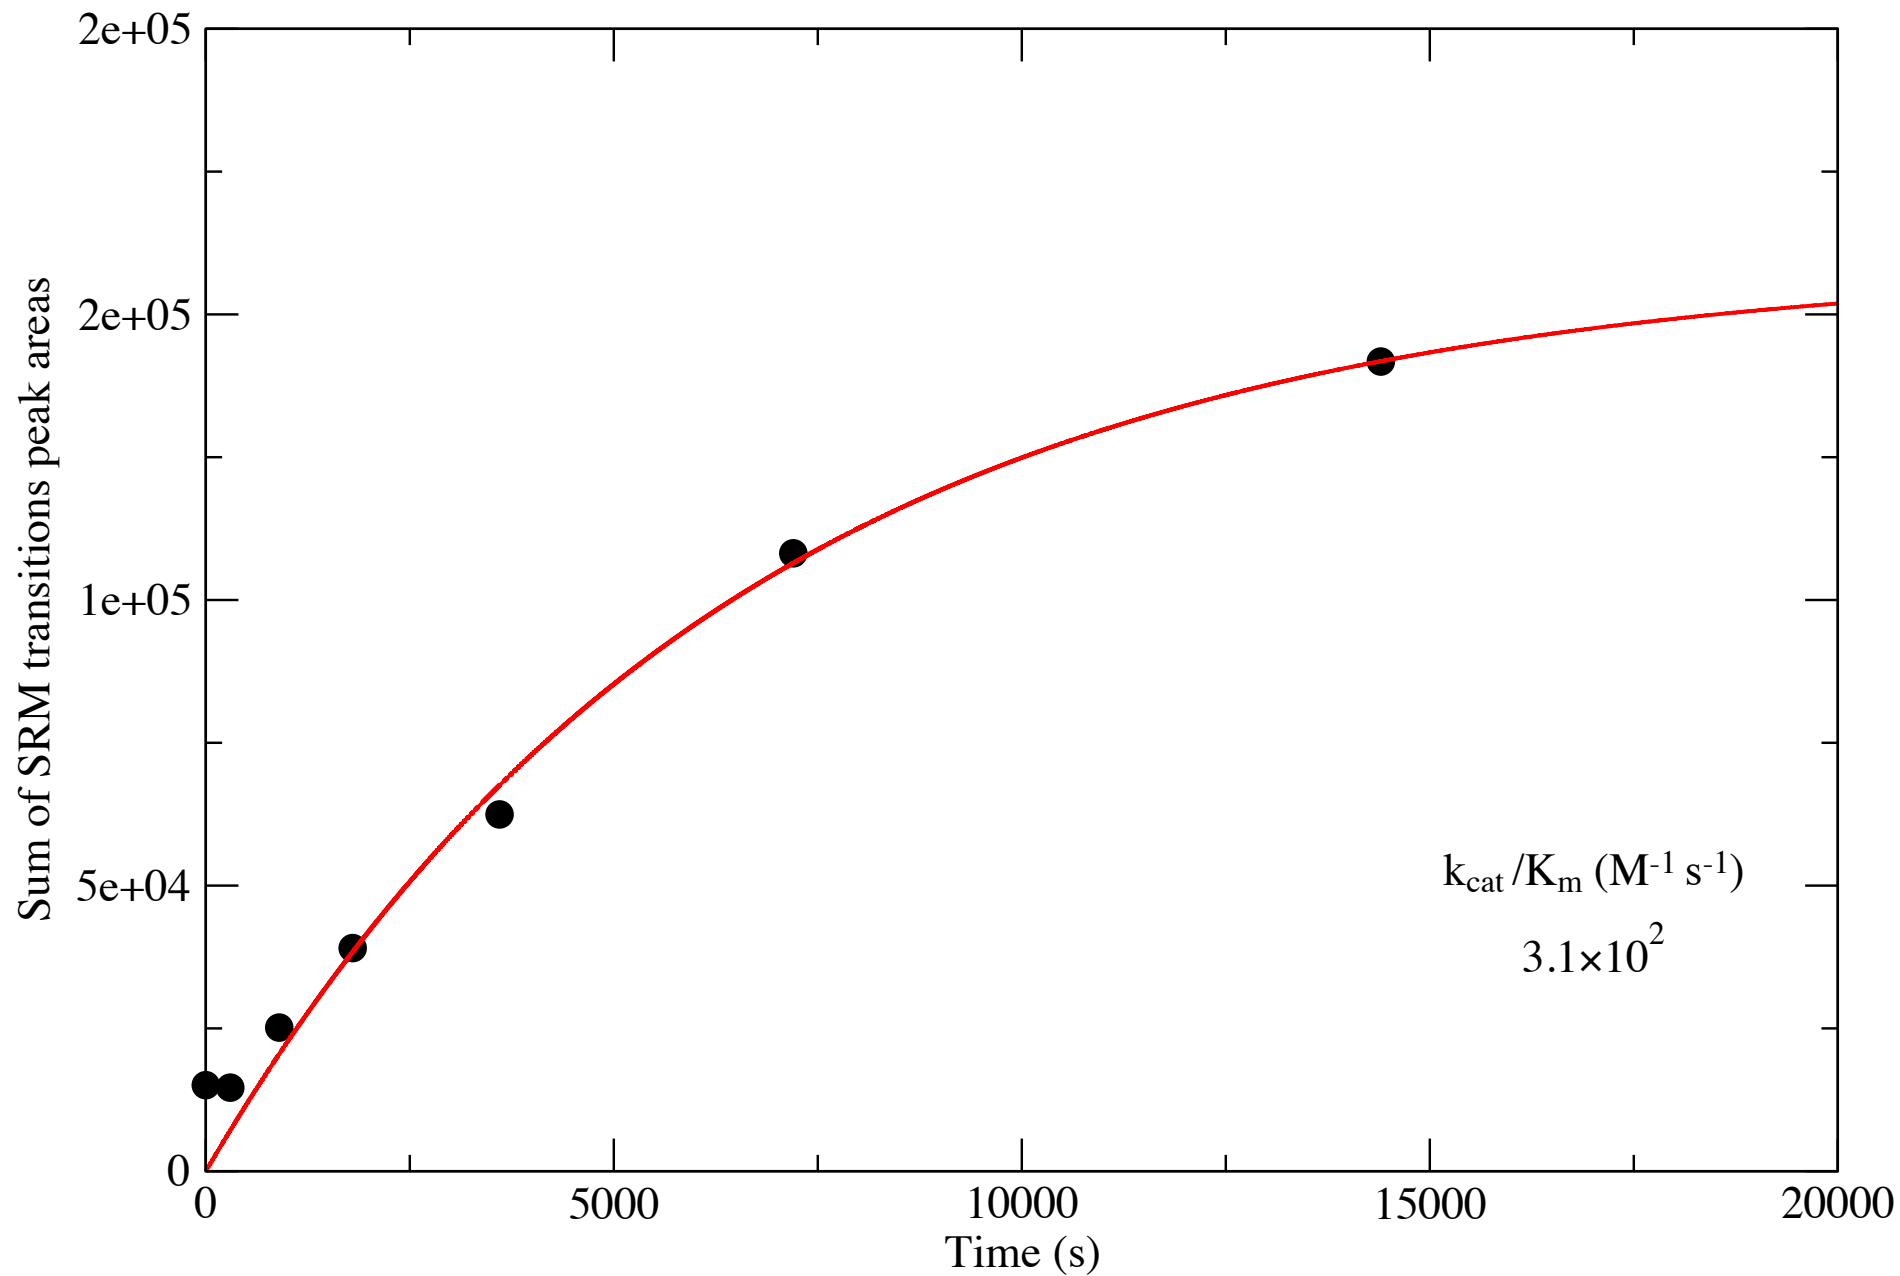

# CH60\_HUMAN (GTTTATVLAR)

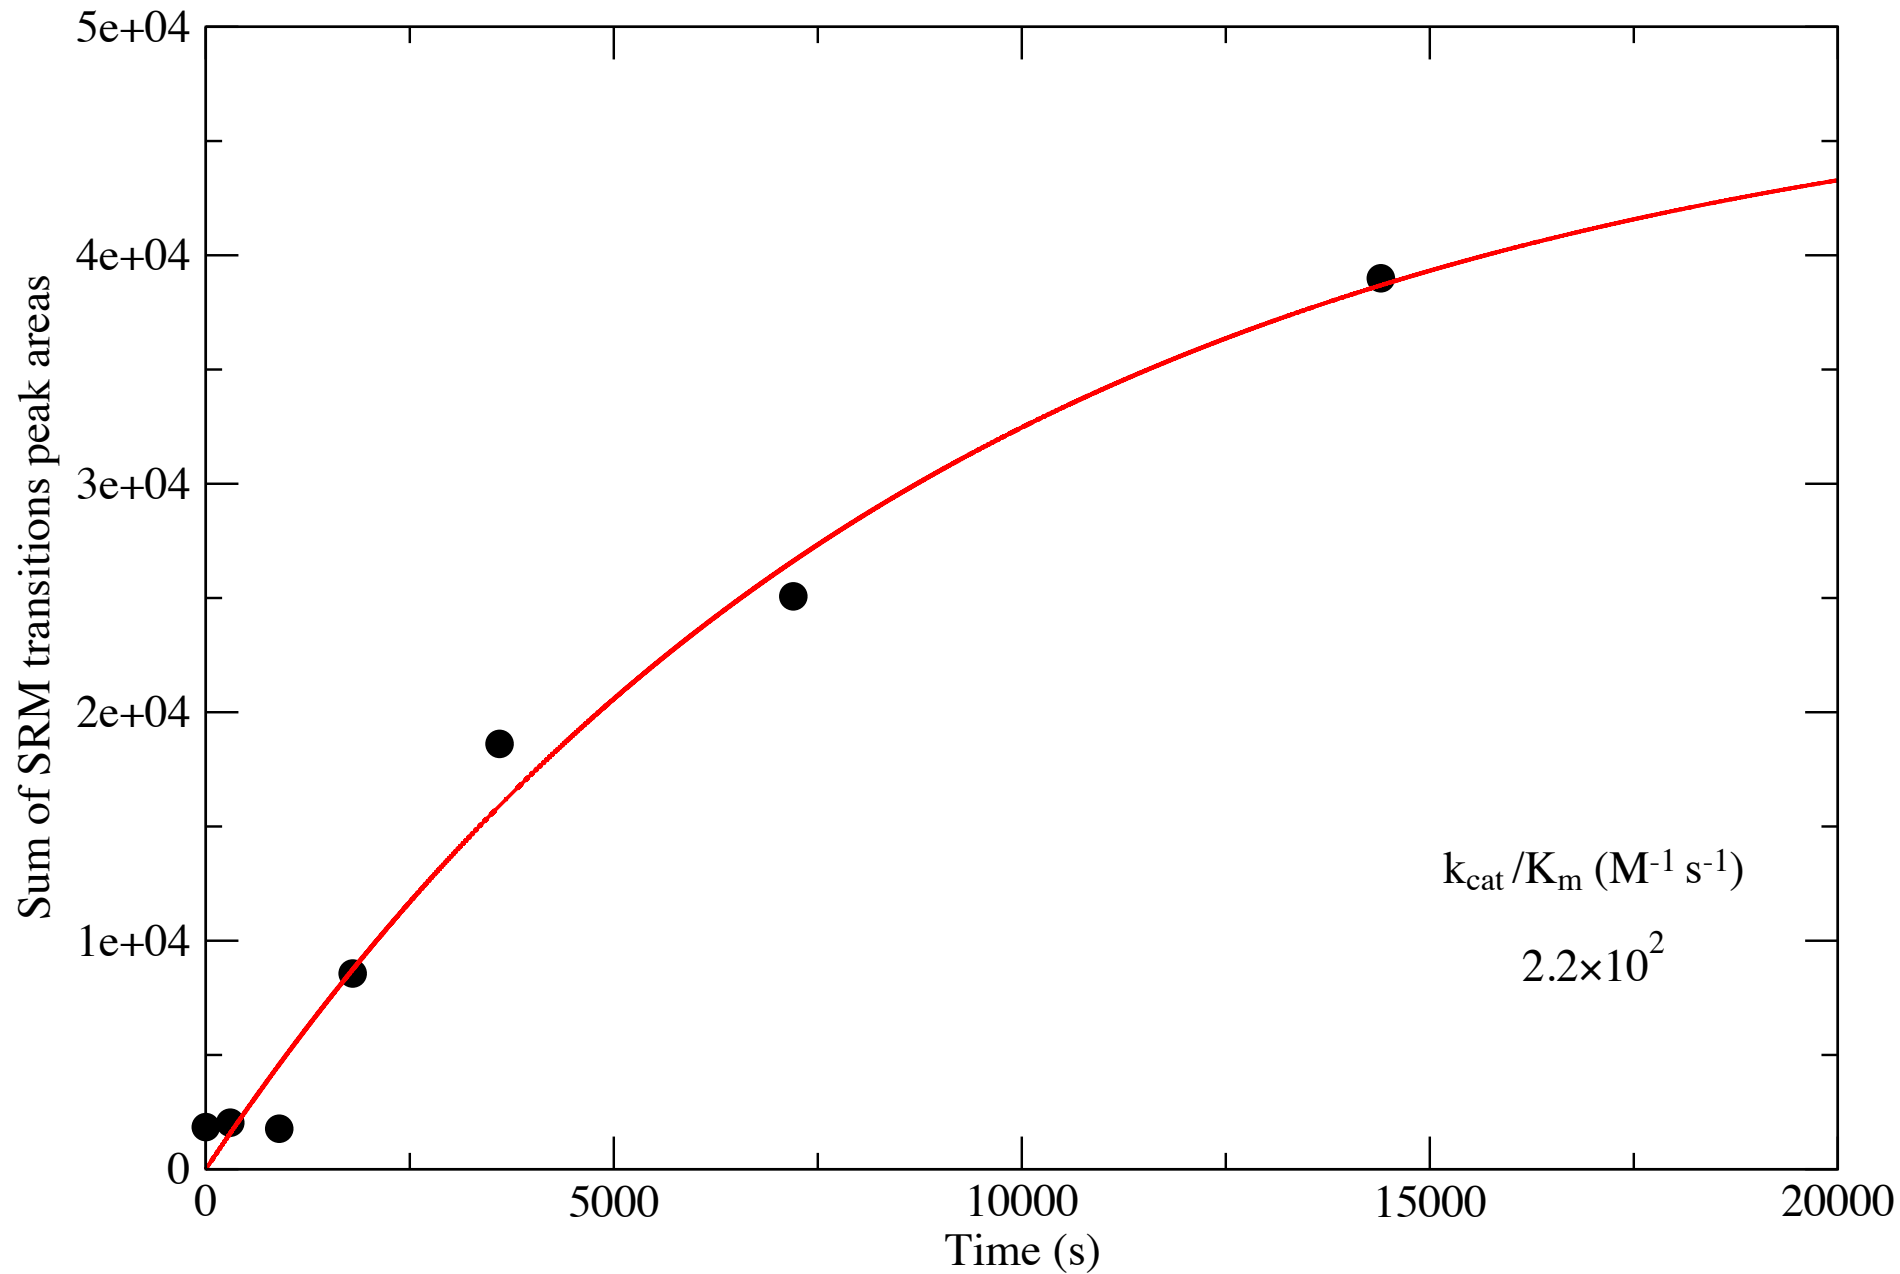

# CHAP1\_HUMAN (AIDDQKCDILVQEELLASPK)

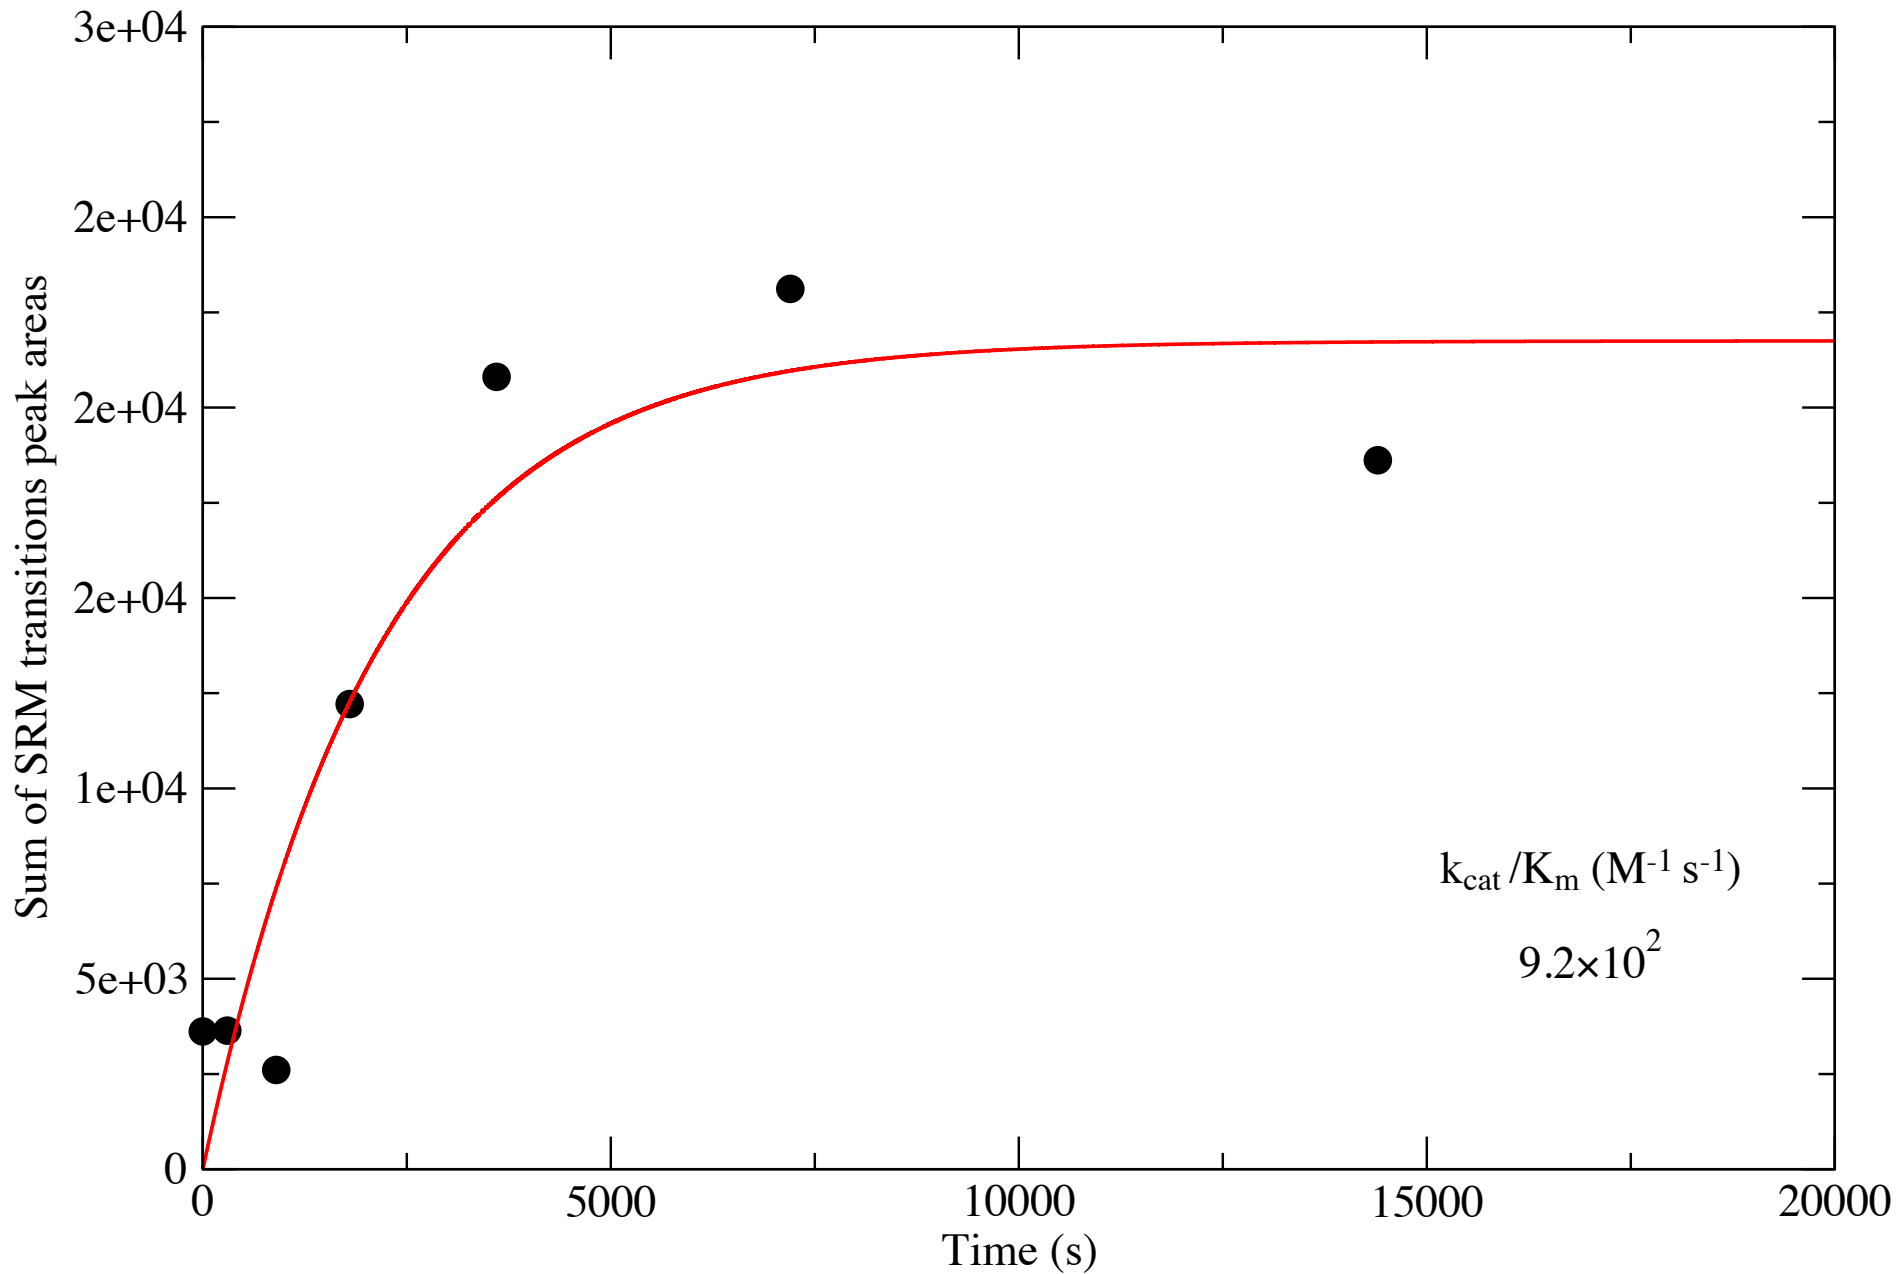

# CHD4\_HUMAN (GYETDHHQDYCEVCQQGGGEIILCDTCPR)

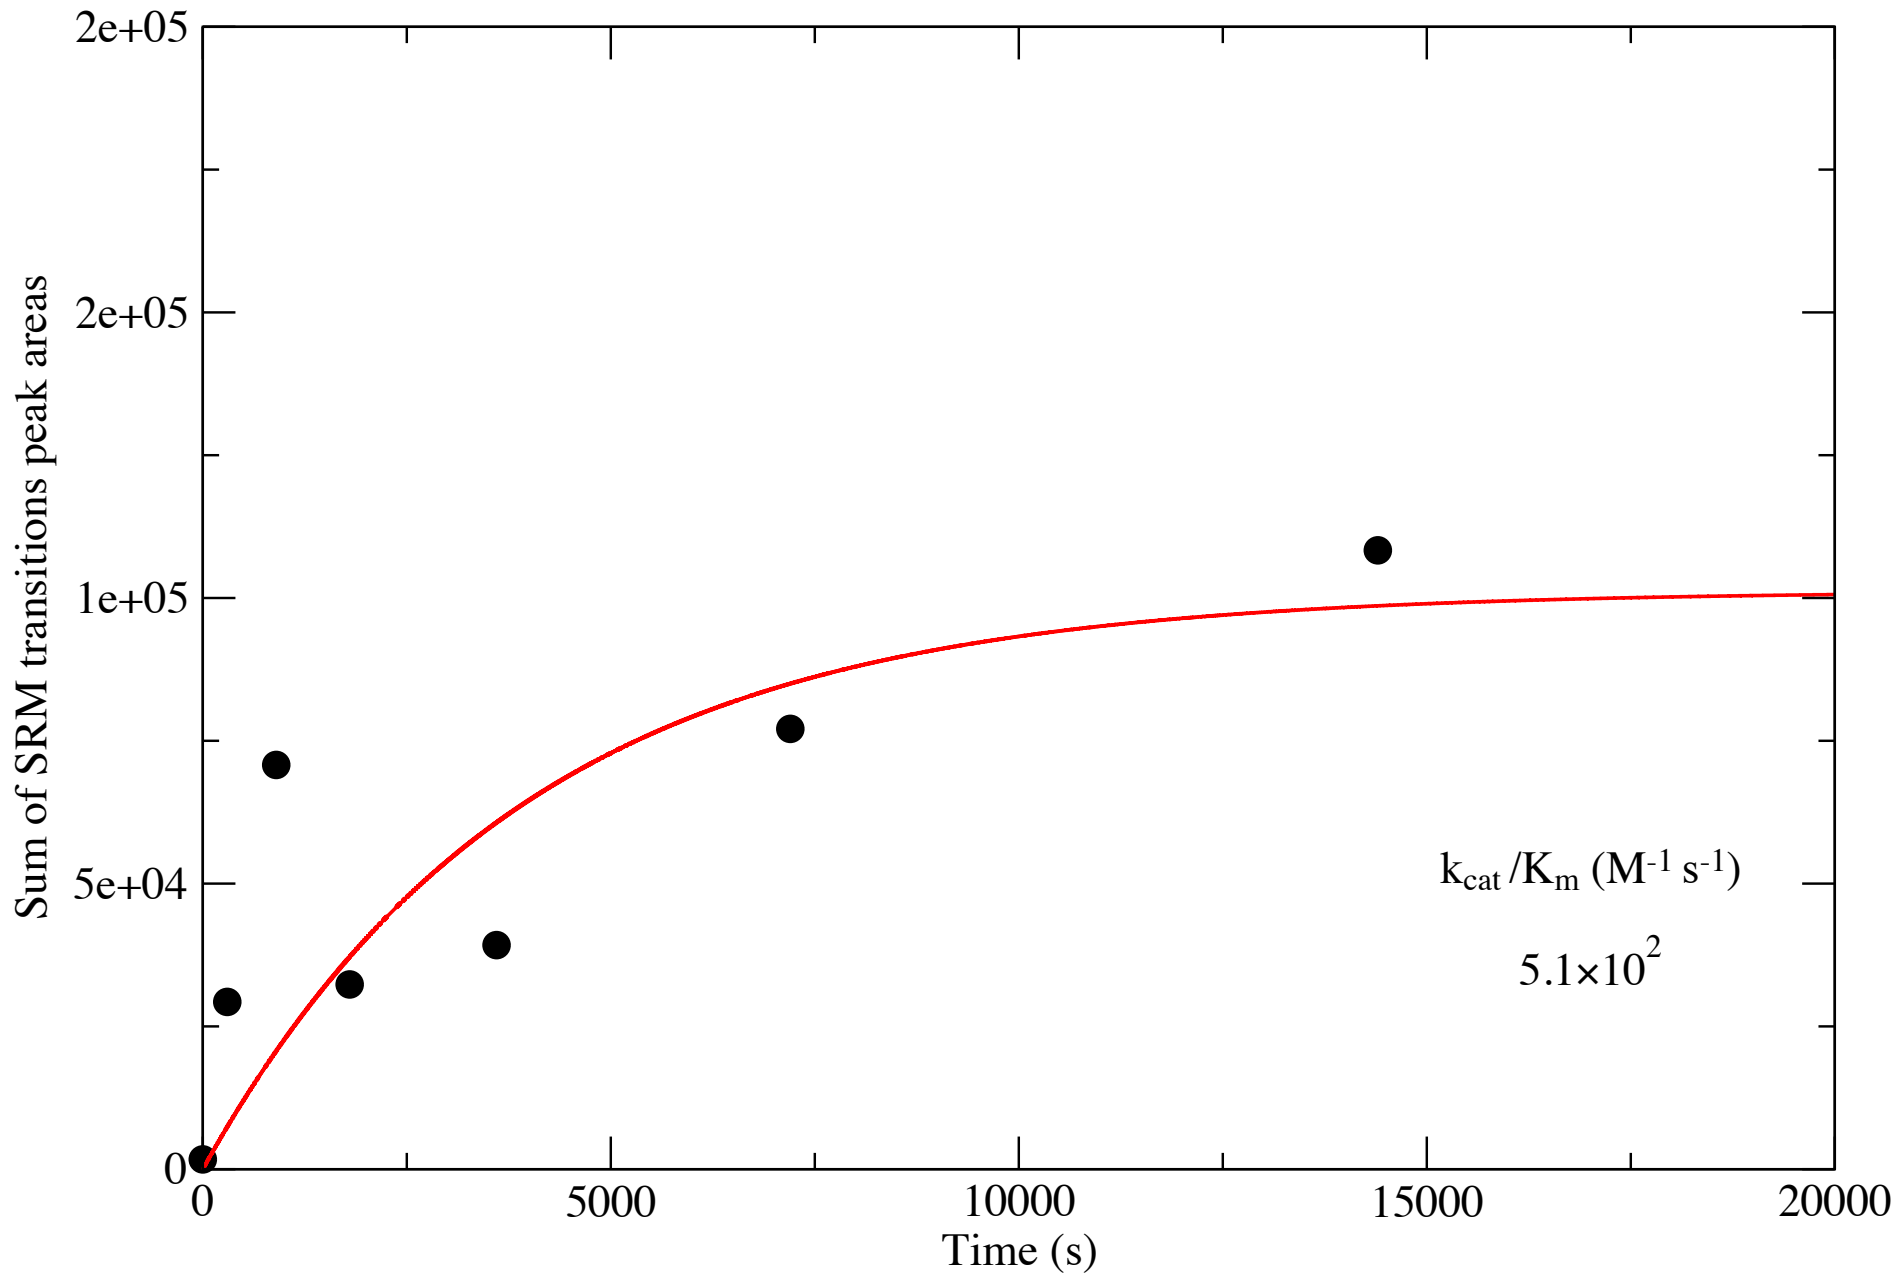



# CL043\_HUMAN (GNELQTTPEFR)

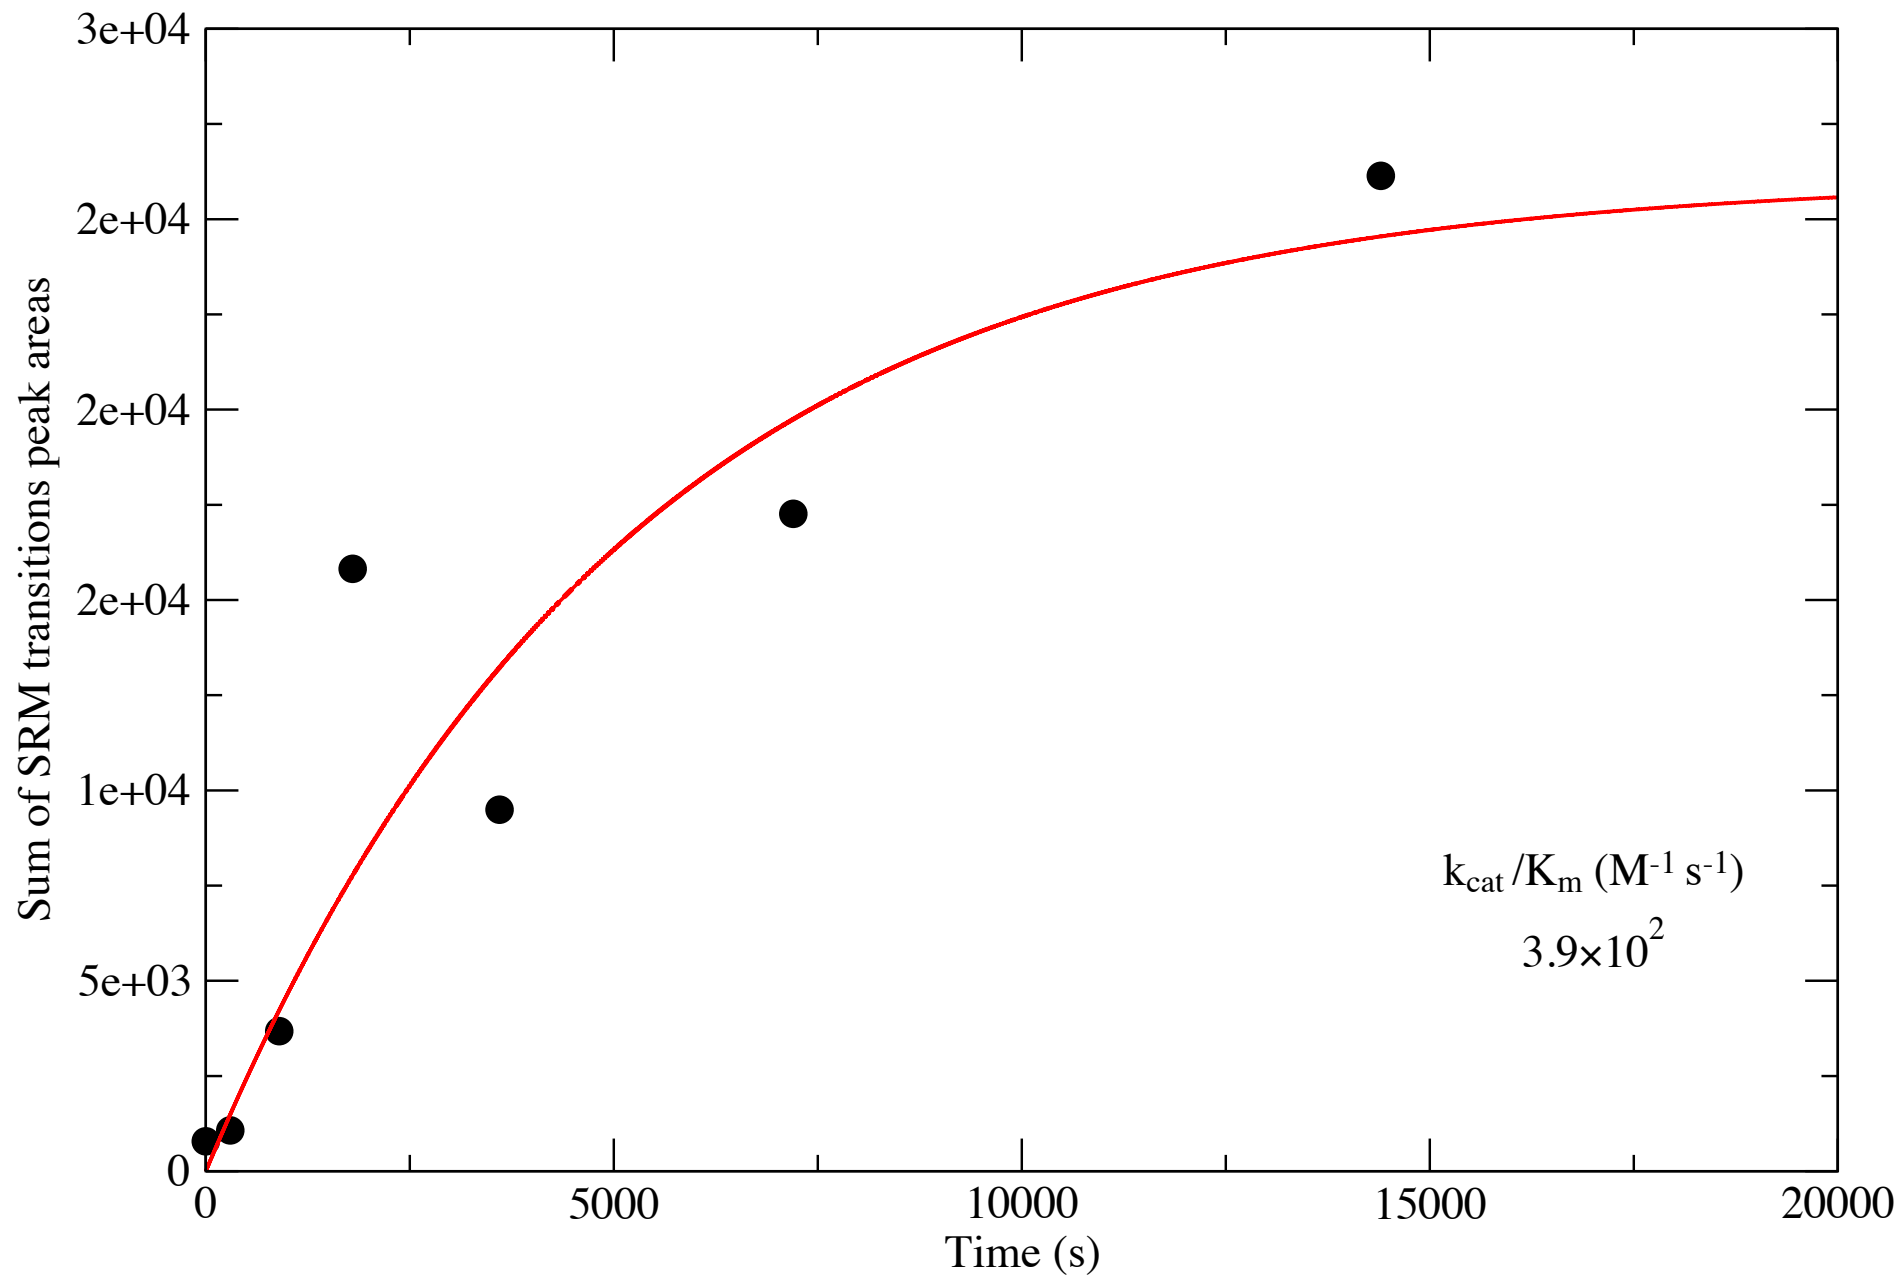

# CLAP1\_HUMAN (GGAASPATEGRGGSEVEGGR)

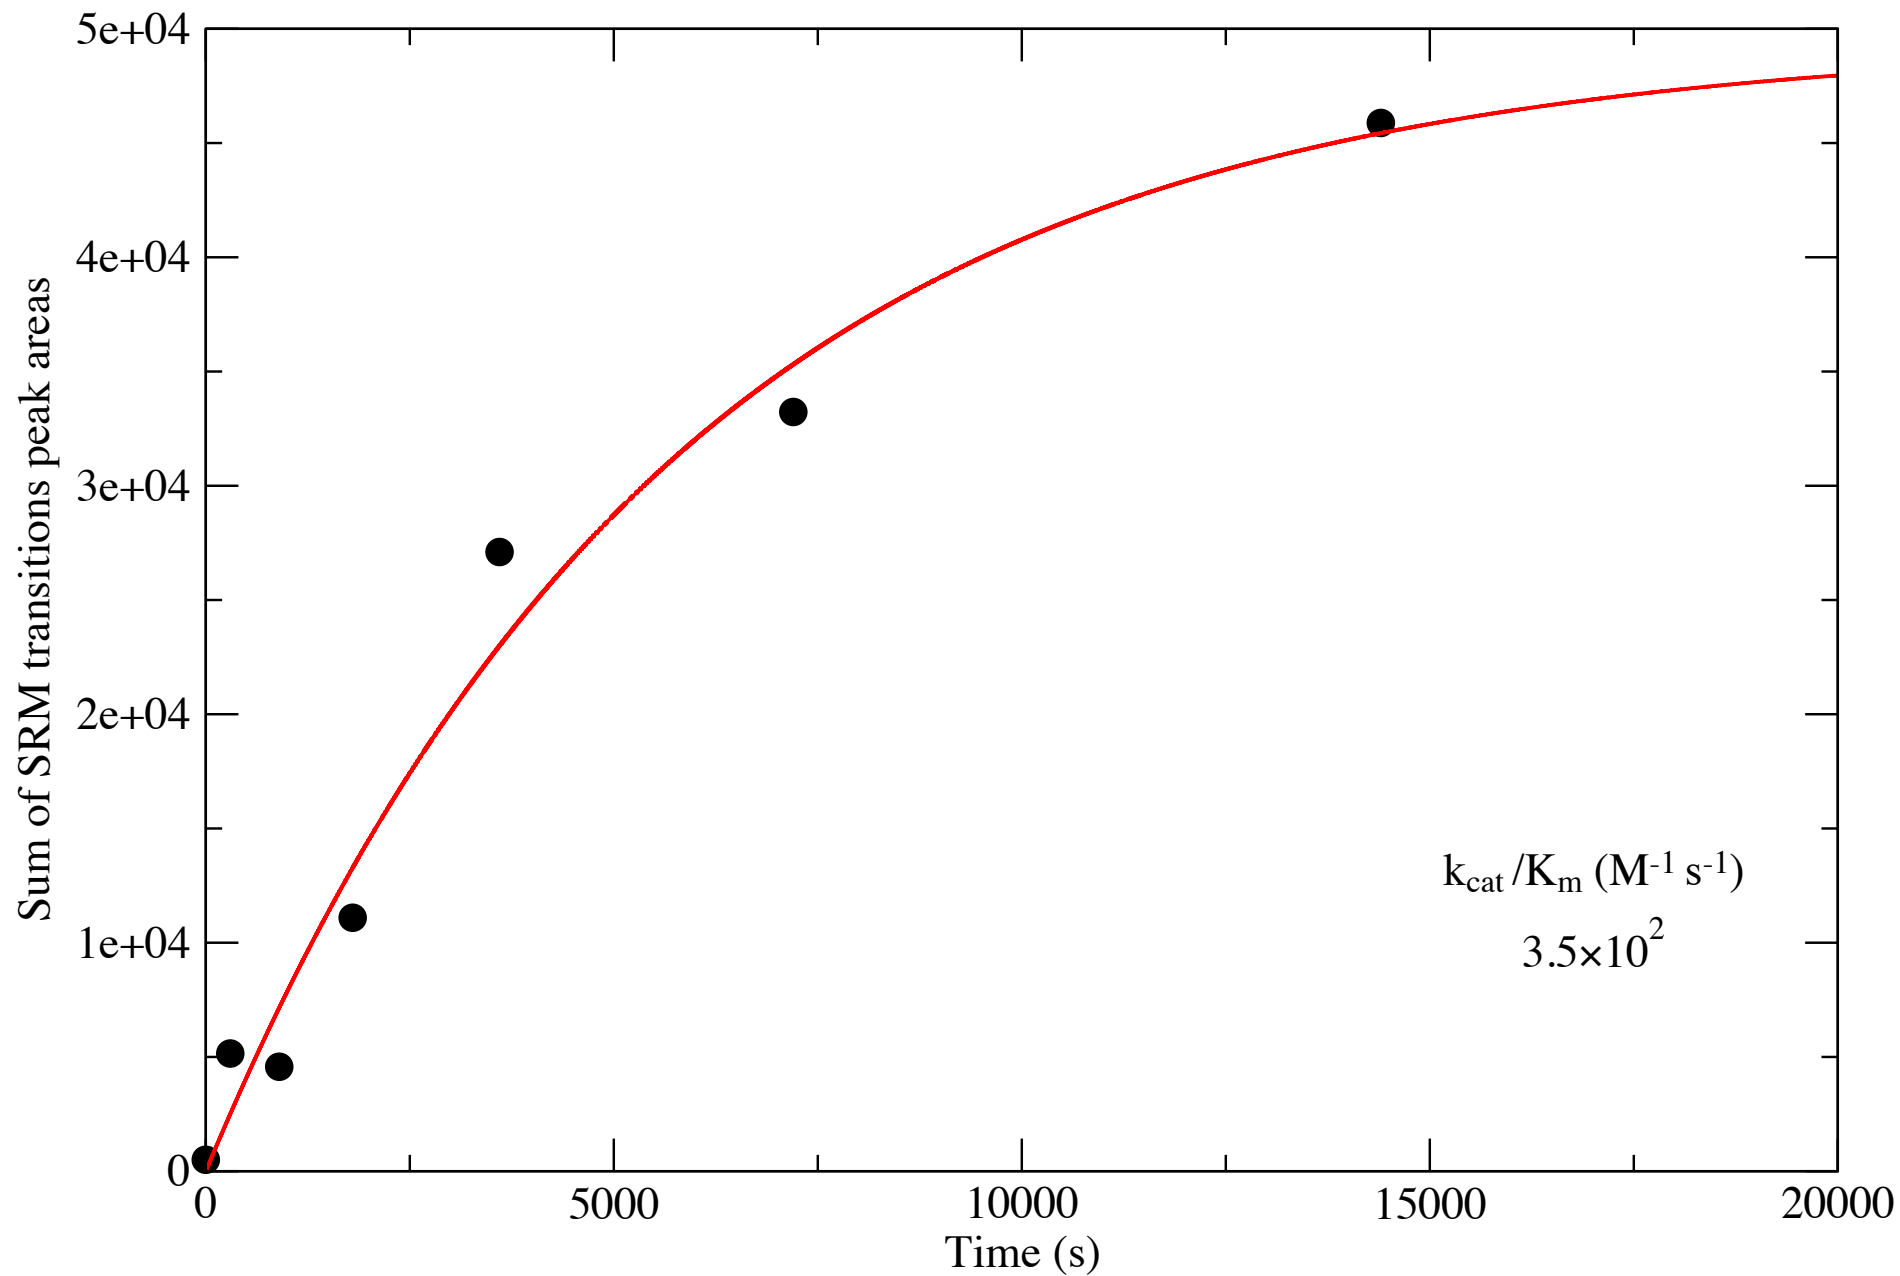

# CLCA\_HUMAN (GVMNGEYYQESNGPTDSYAAISQVDR)

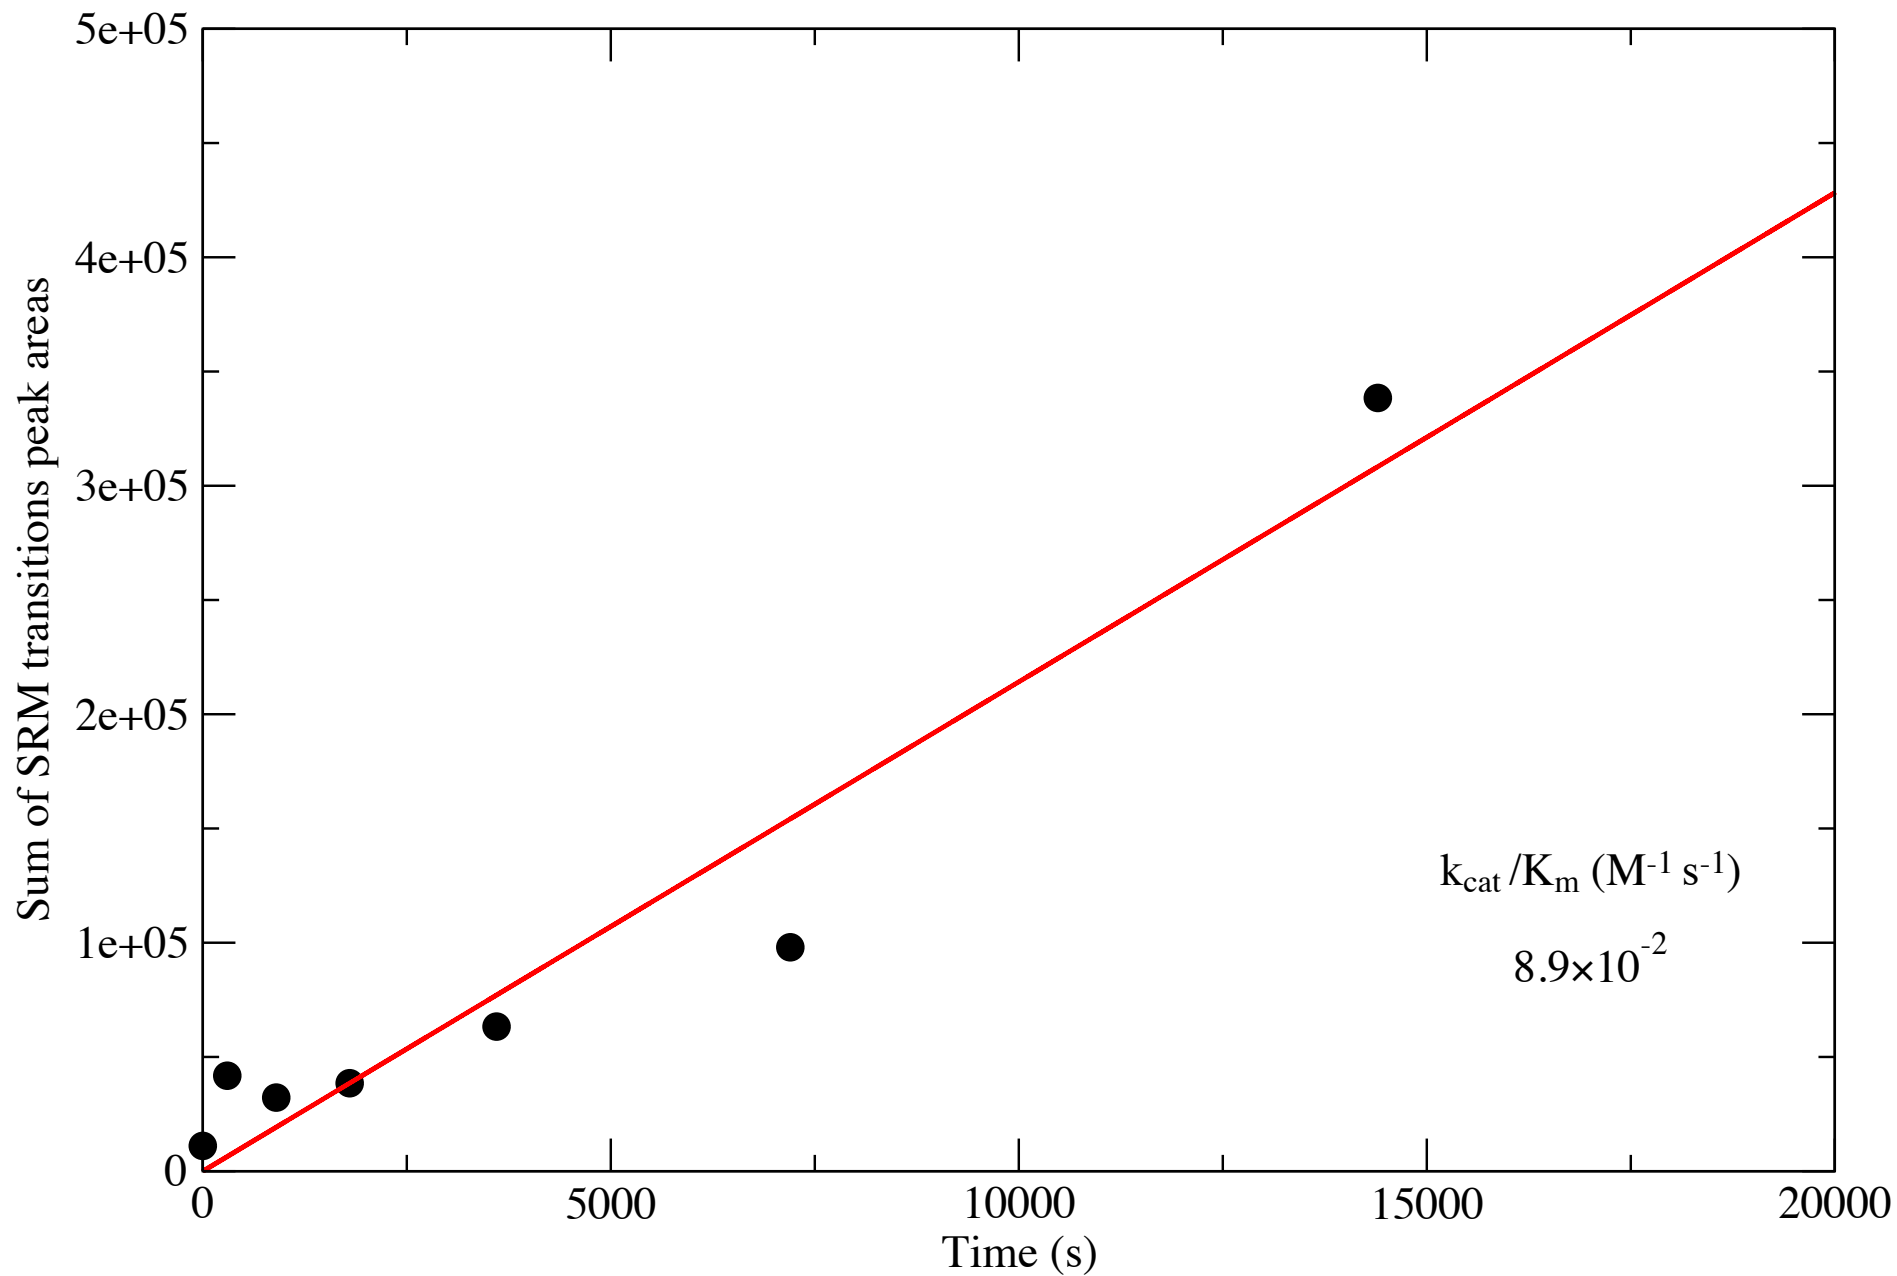

# COPA\_HUMAN (GFVEATEGLGDDALGK)

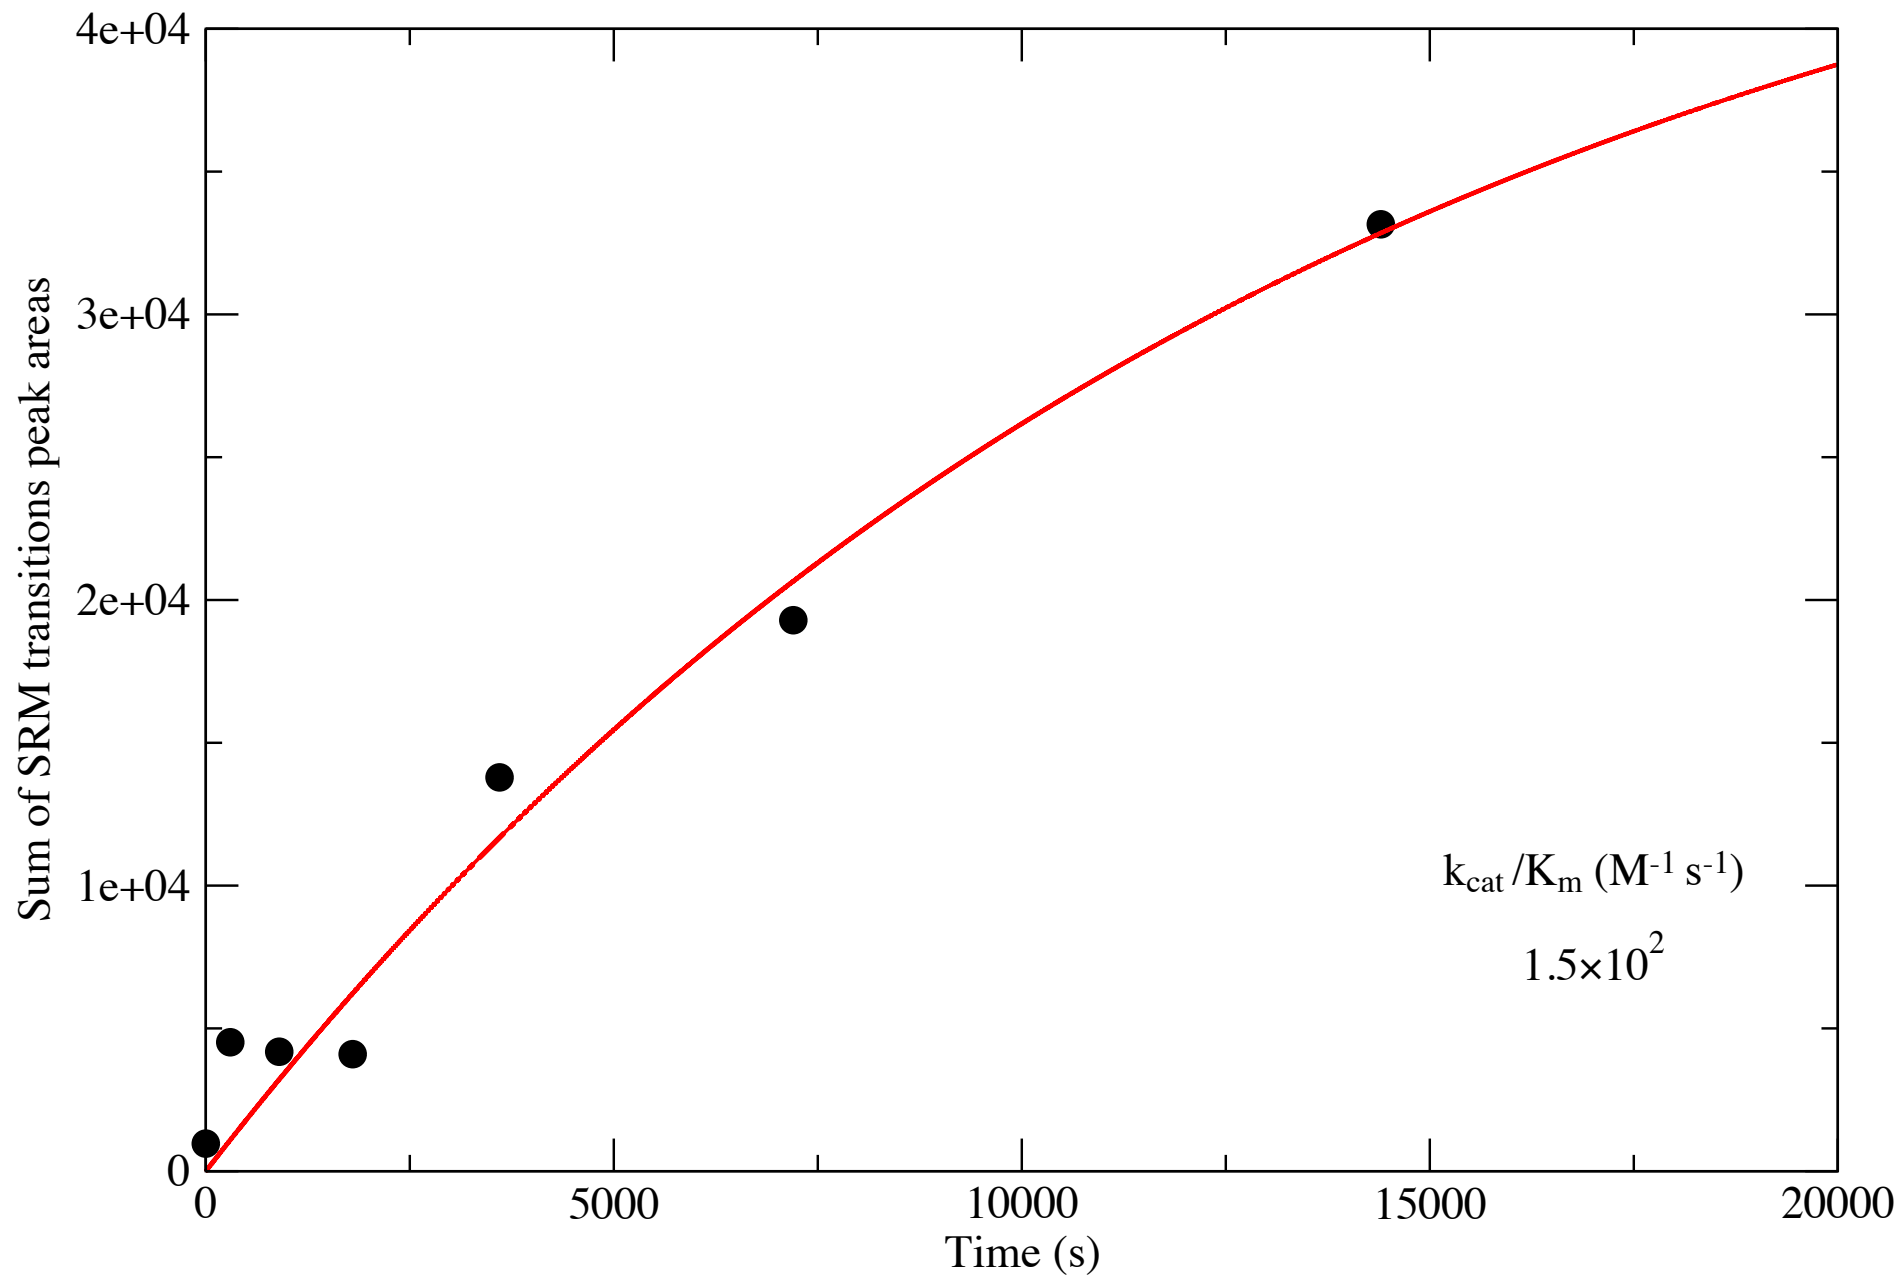

# COPB2\_HUMAN (GKPASPTPVIVASHTANKEEK)

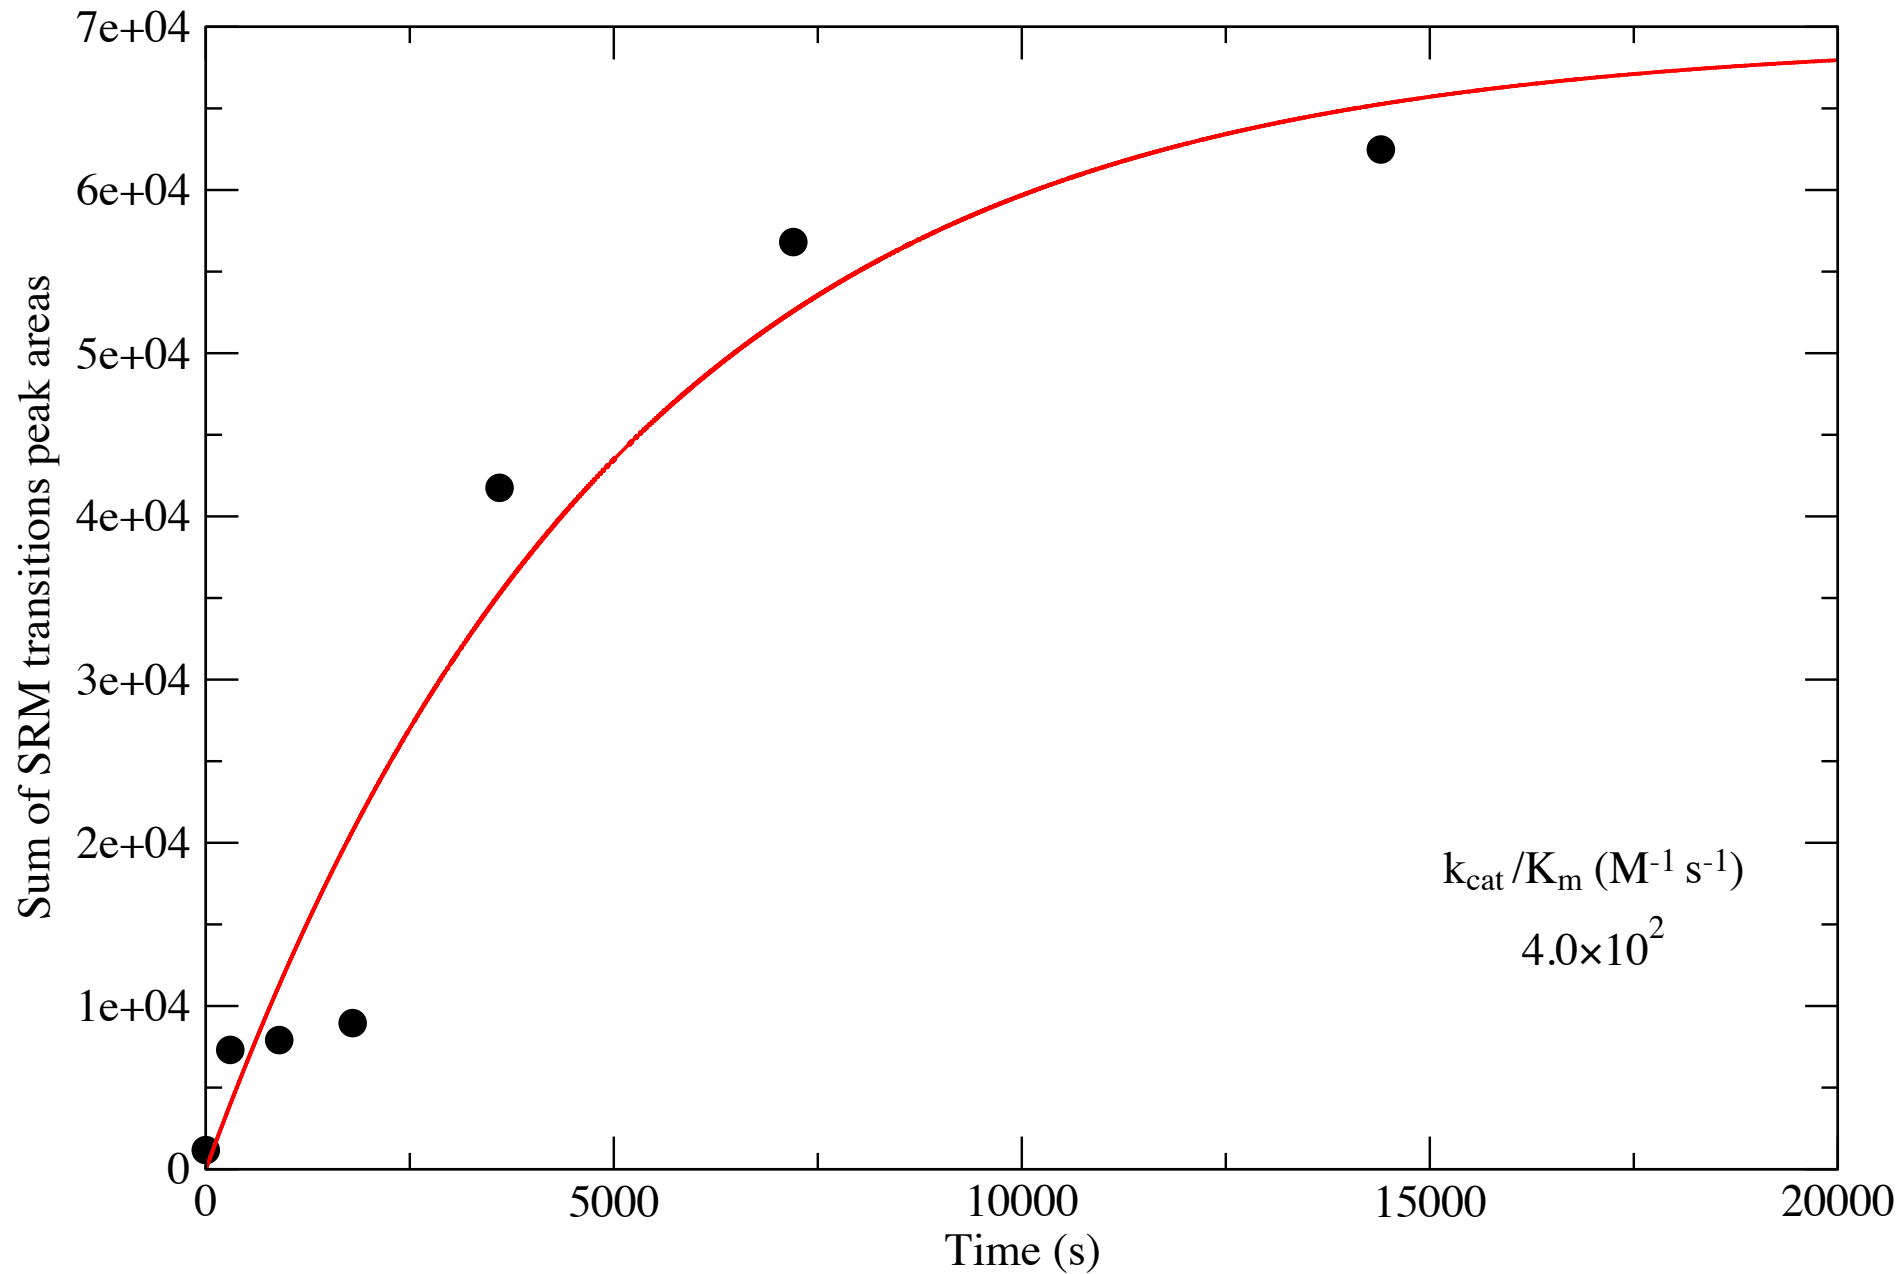

# CP110\_HUMAN (GLQKENCPTYVITSGITEQER)

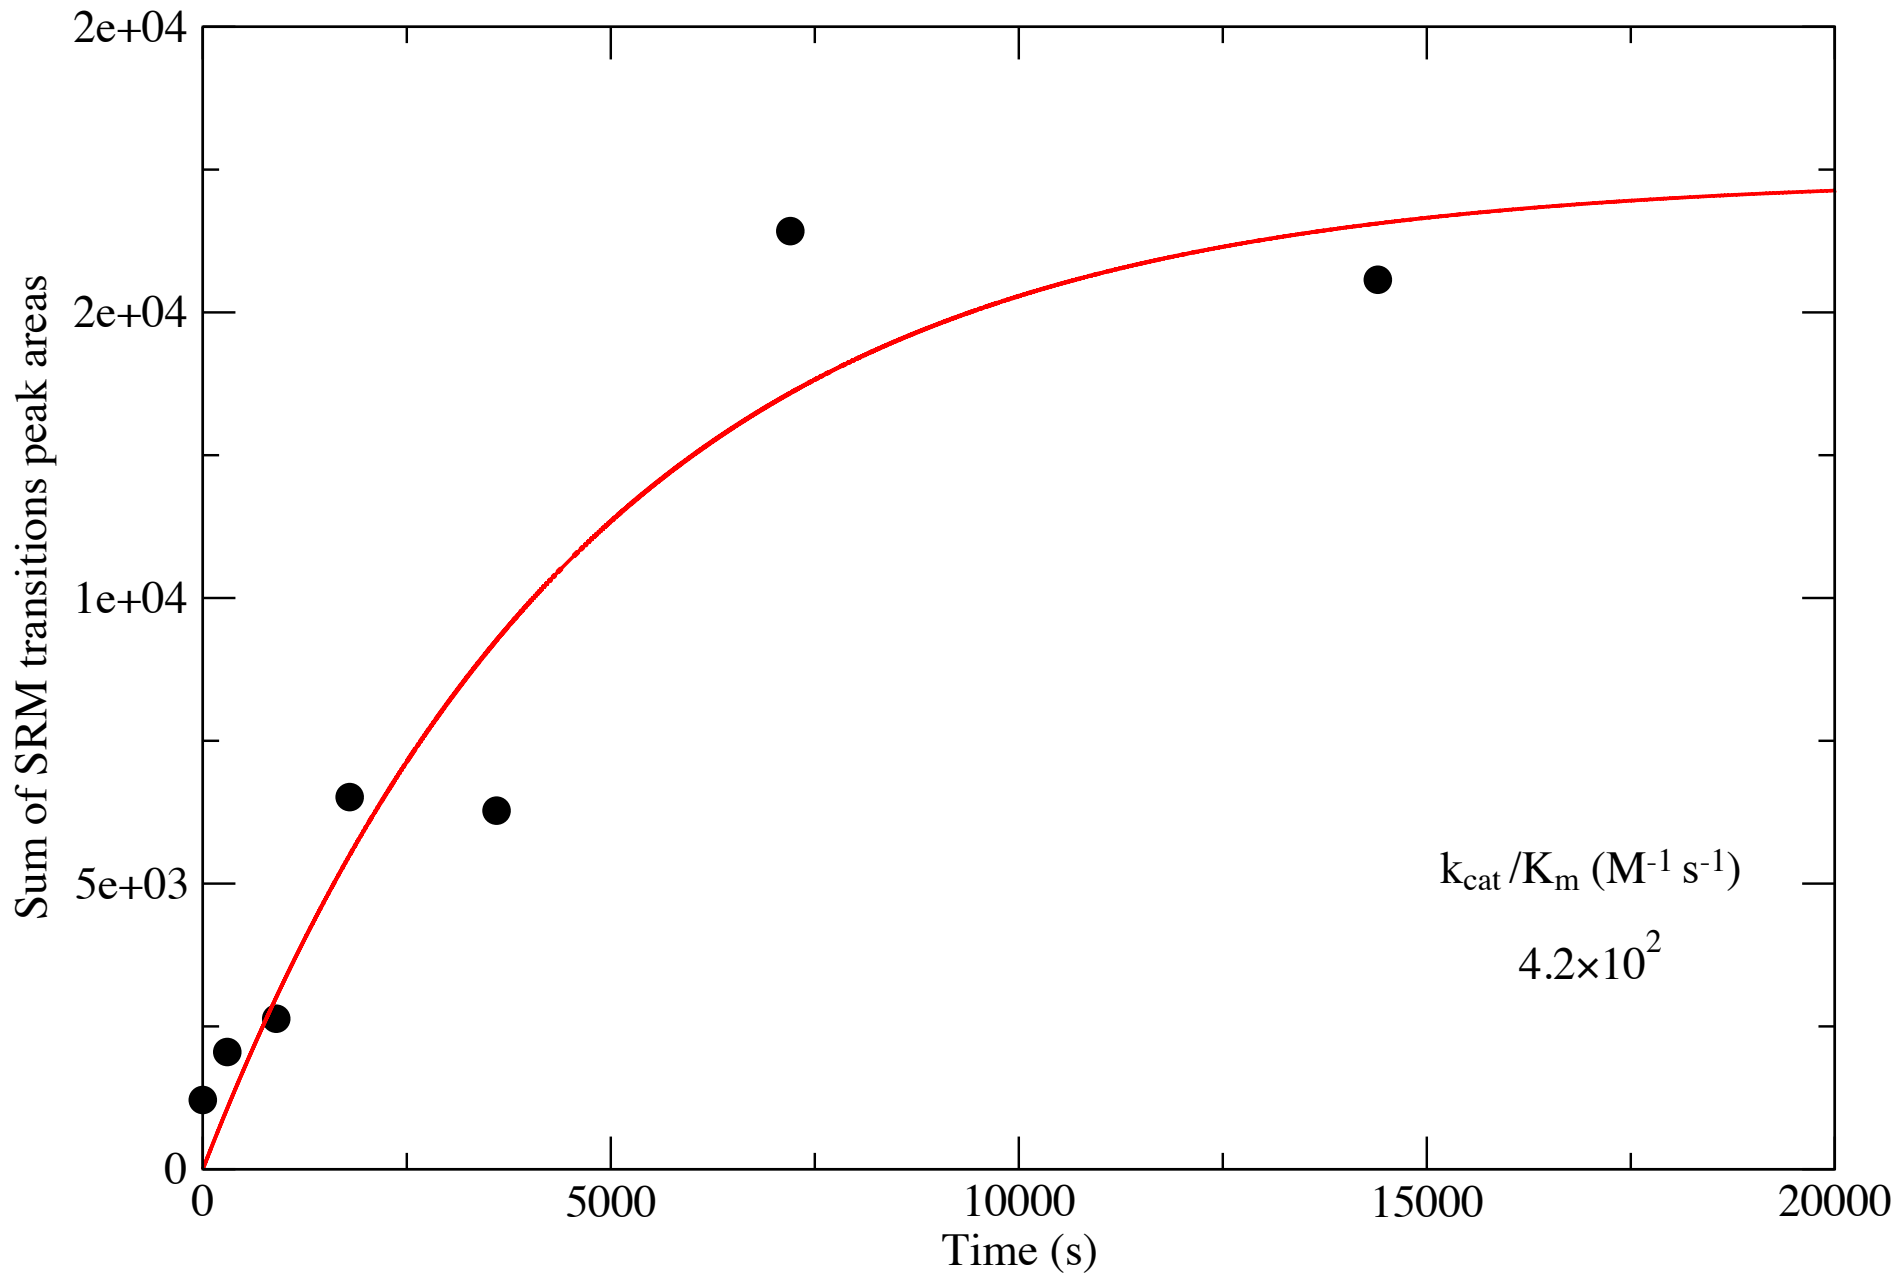

# CP135\_HUMAN (QLAQQLER)

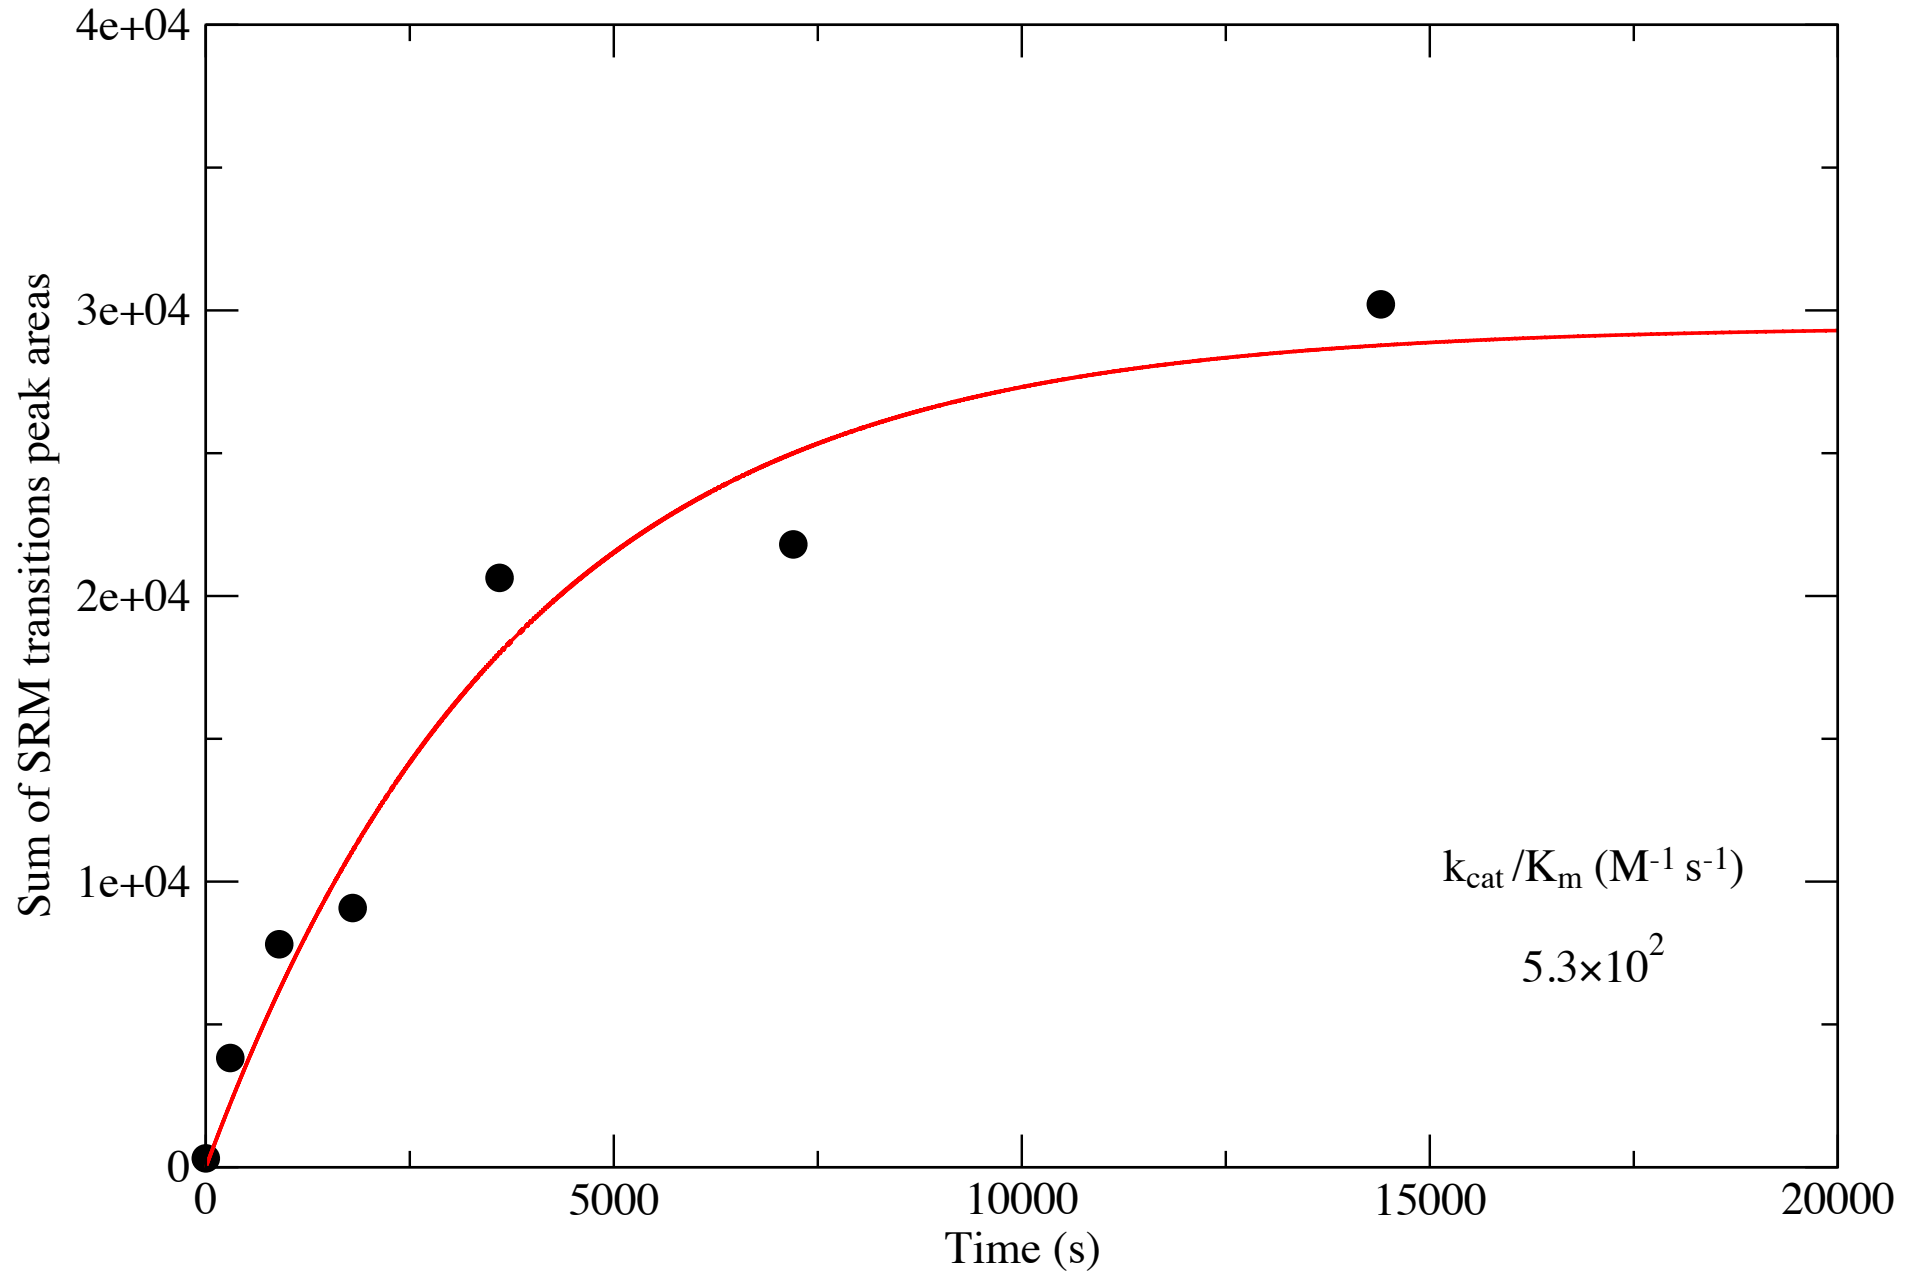

# CPZIP\_HUMAN (GQHHPAQEEVPESPQTSGPEAENR)

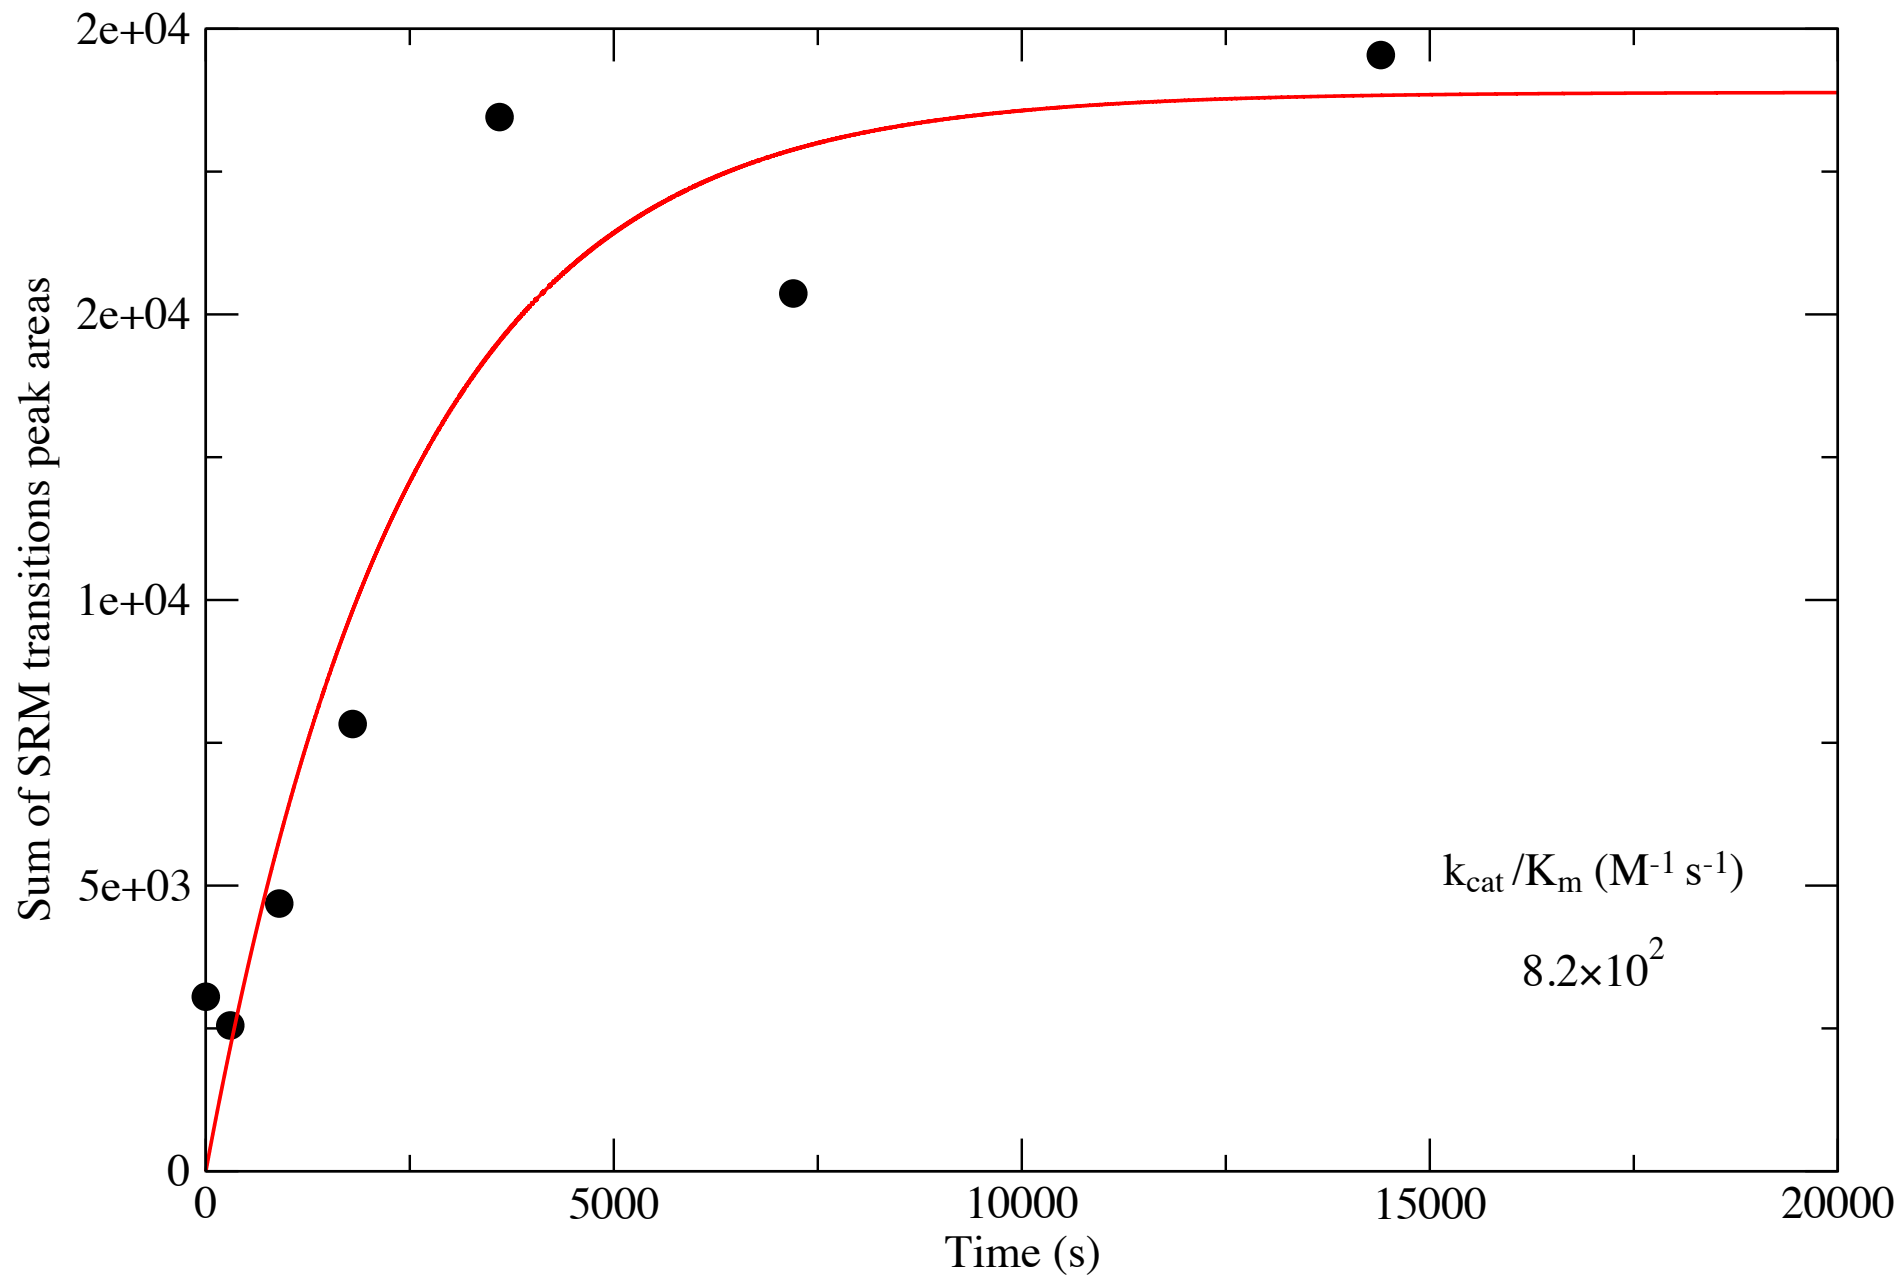



# CR025\_HUMAN (GVADSTVISSMPCLLMELRR)

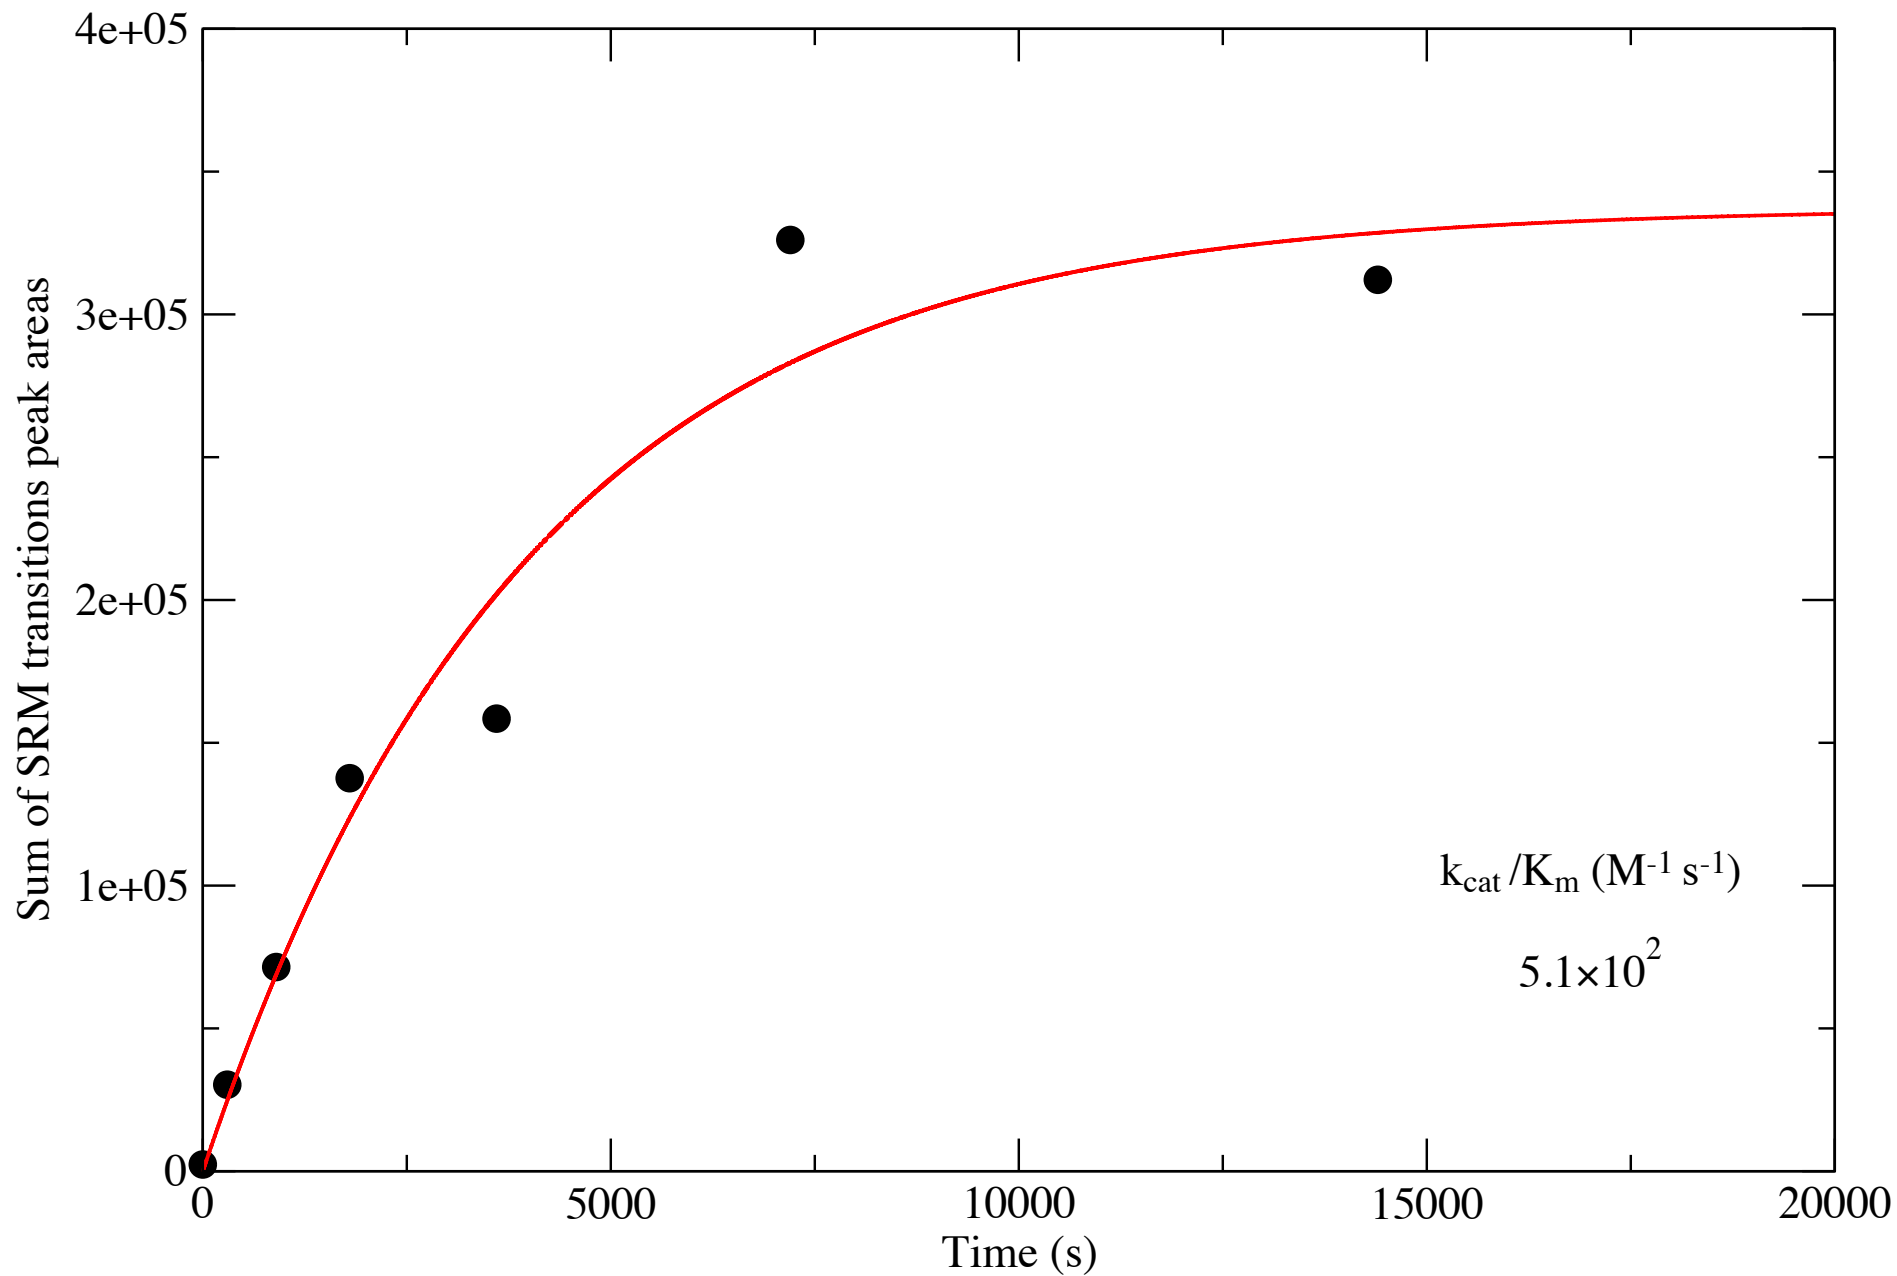

# CTBL1\_HUMAN (GEEEEEEEEEEPLDESSVKK)

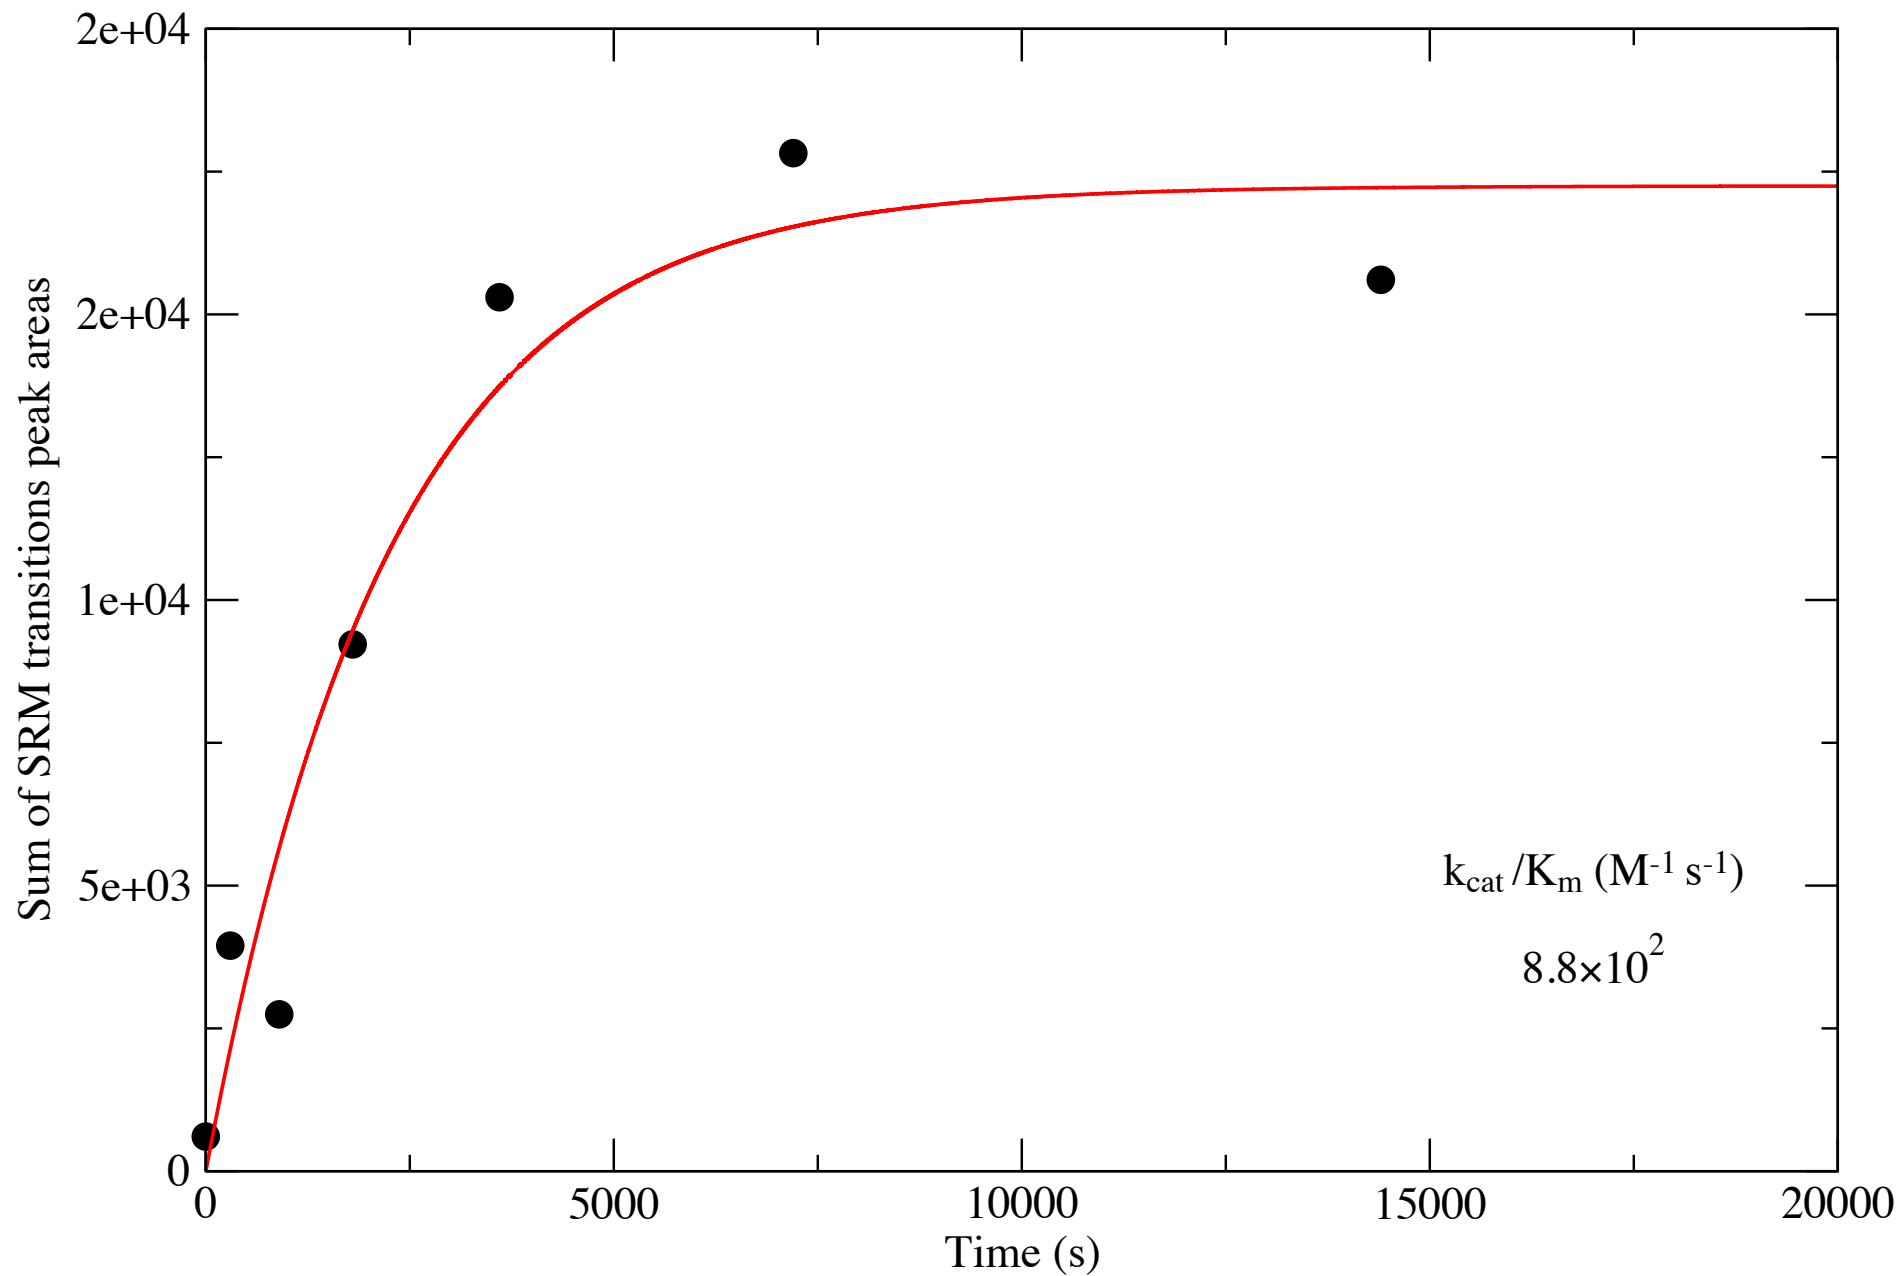

# CTF18\_HUMAN (GSPPGLEGLLLGGIGEK)

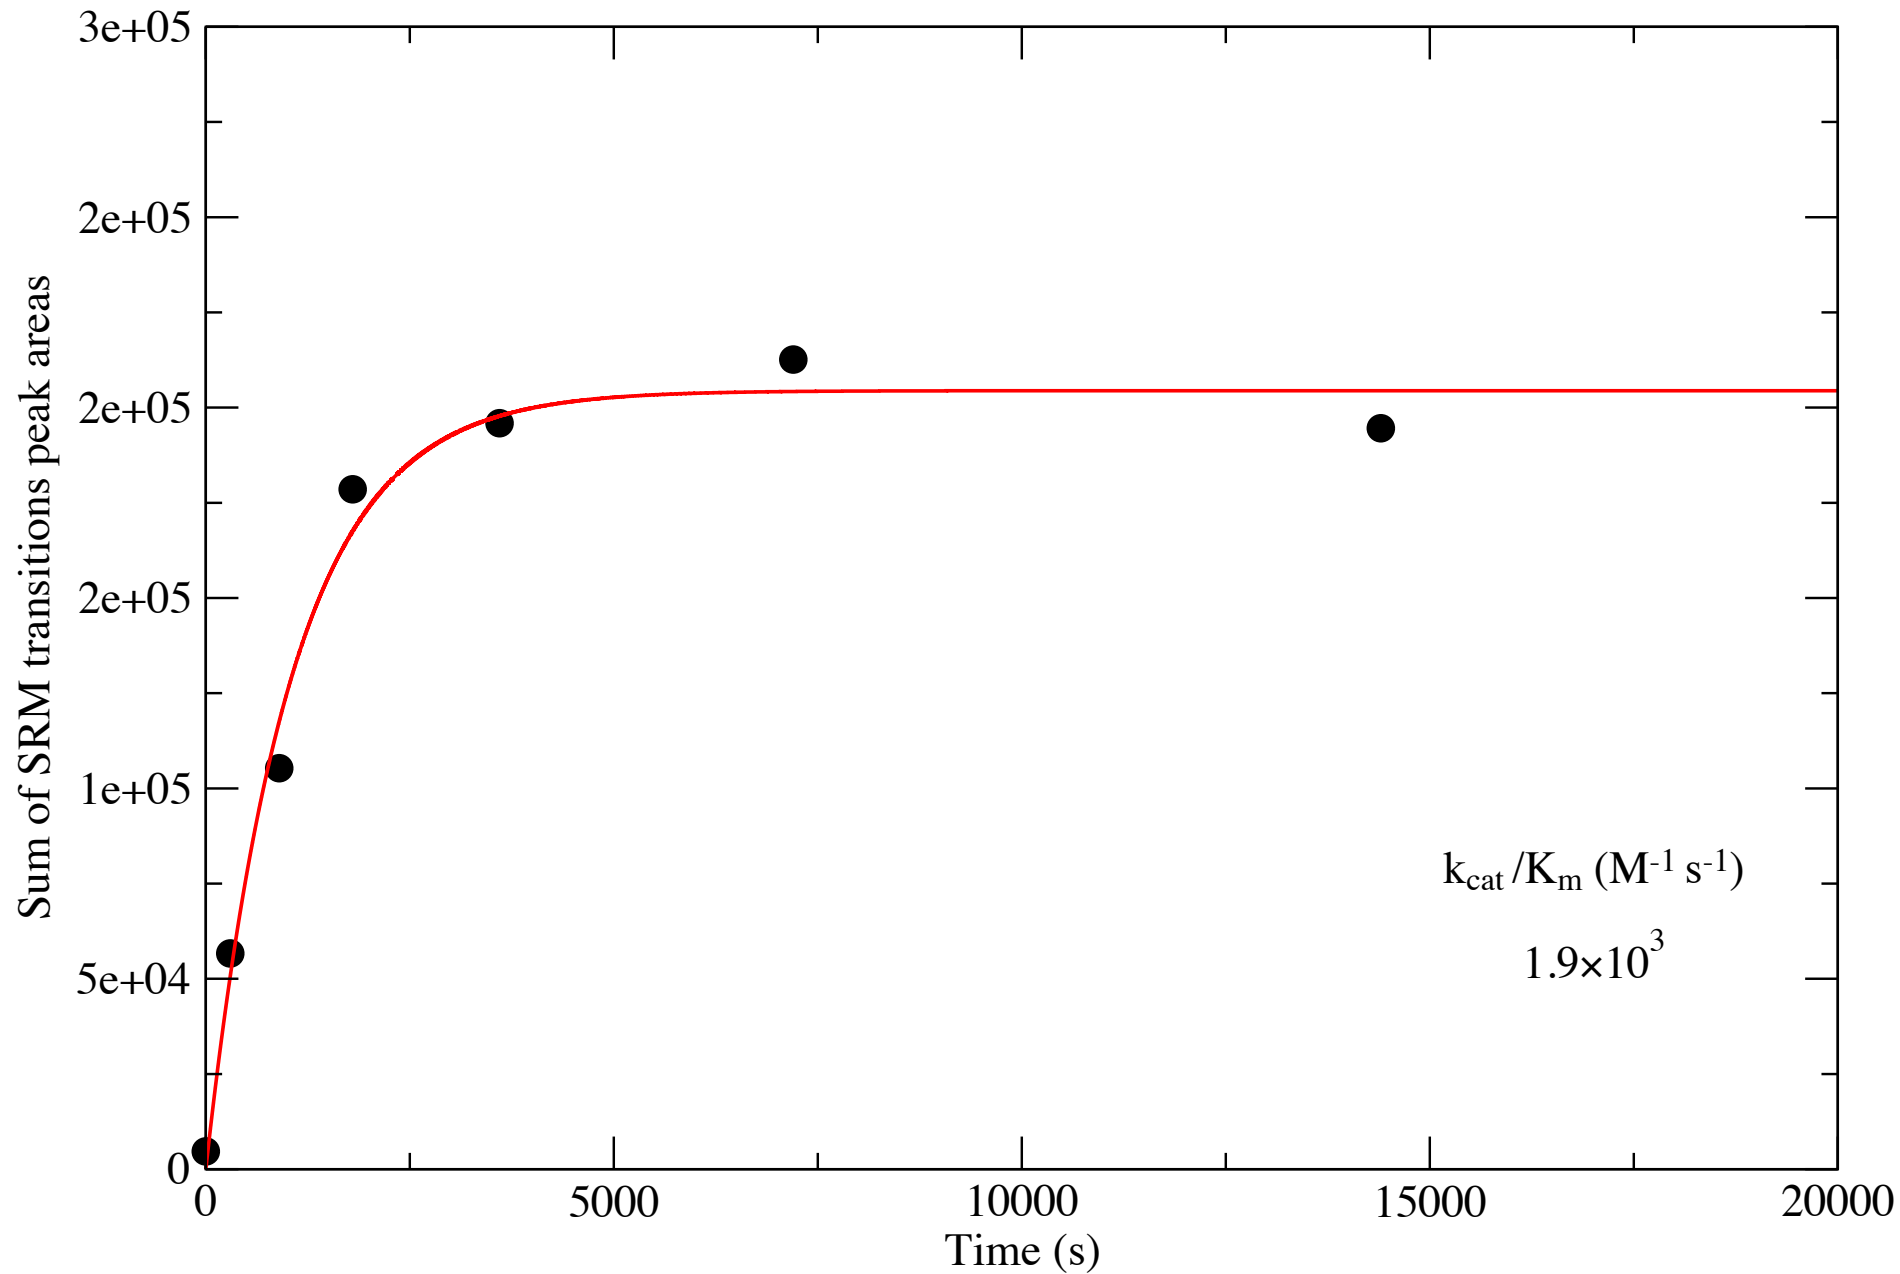

# DDX24\_HUMAN (ALPDDTVIESEALPSDIAAEAR)

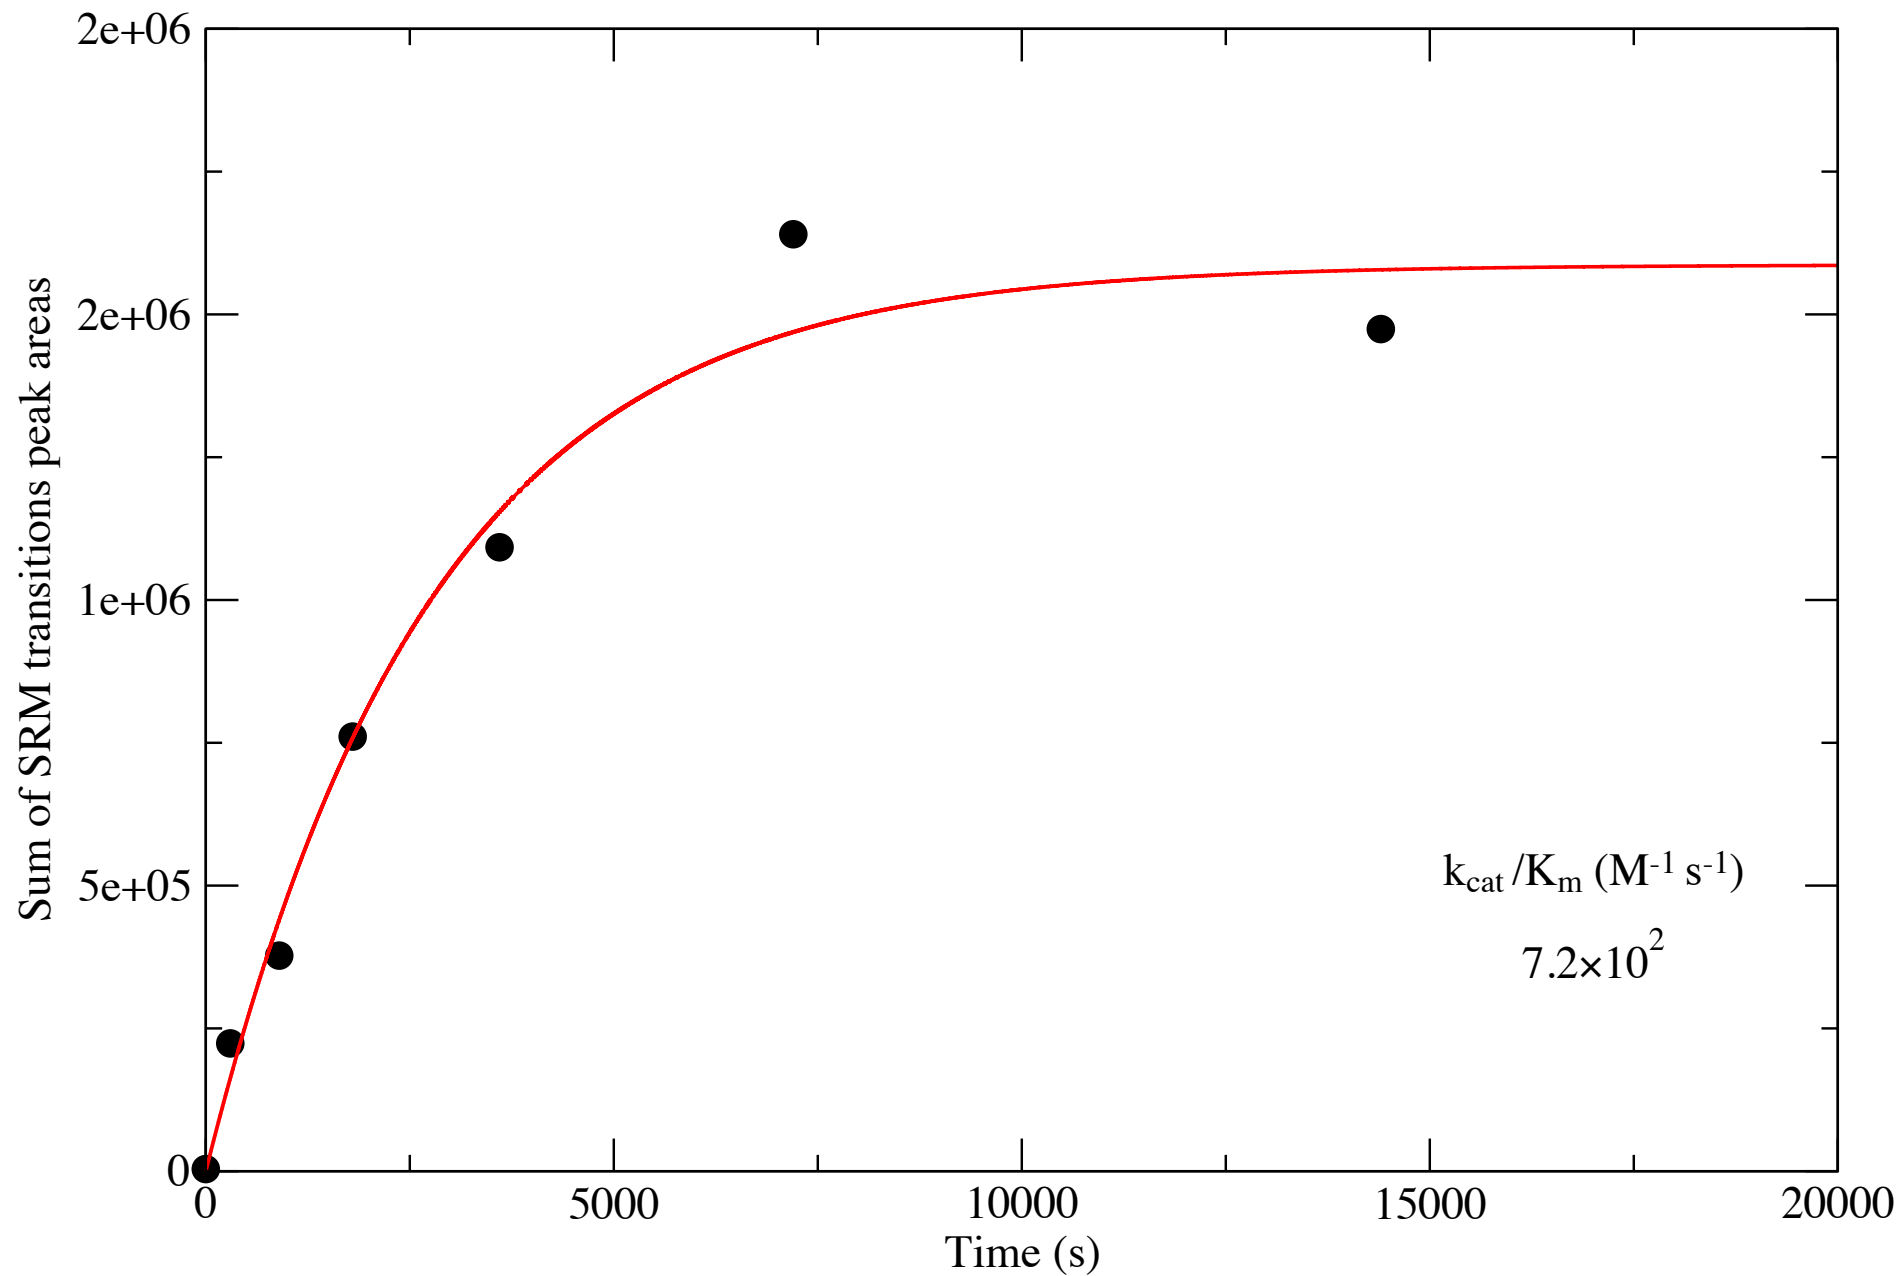

# DDX59\_HUMAN (AVATEAATIDR)

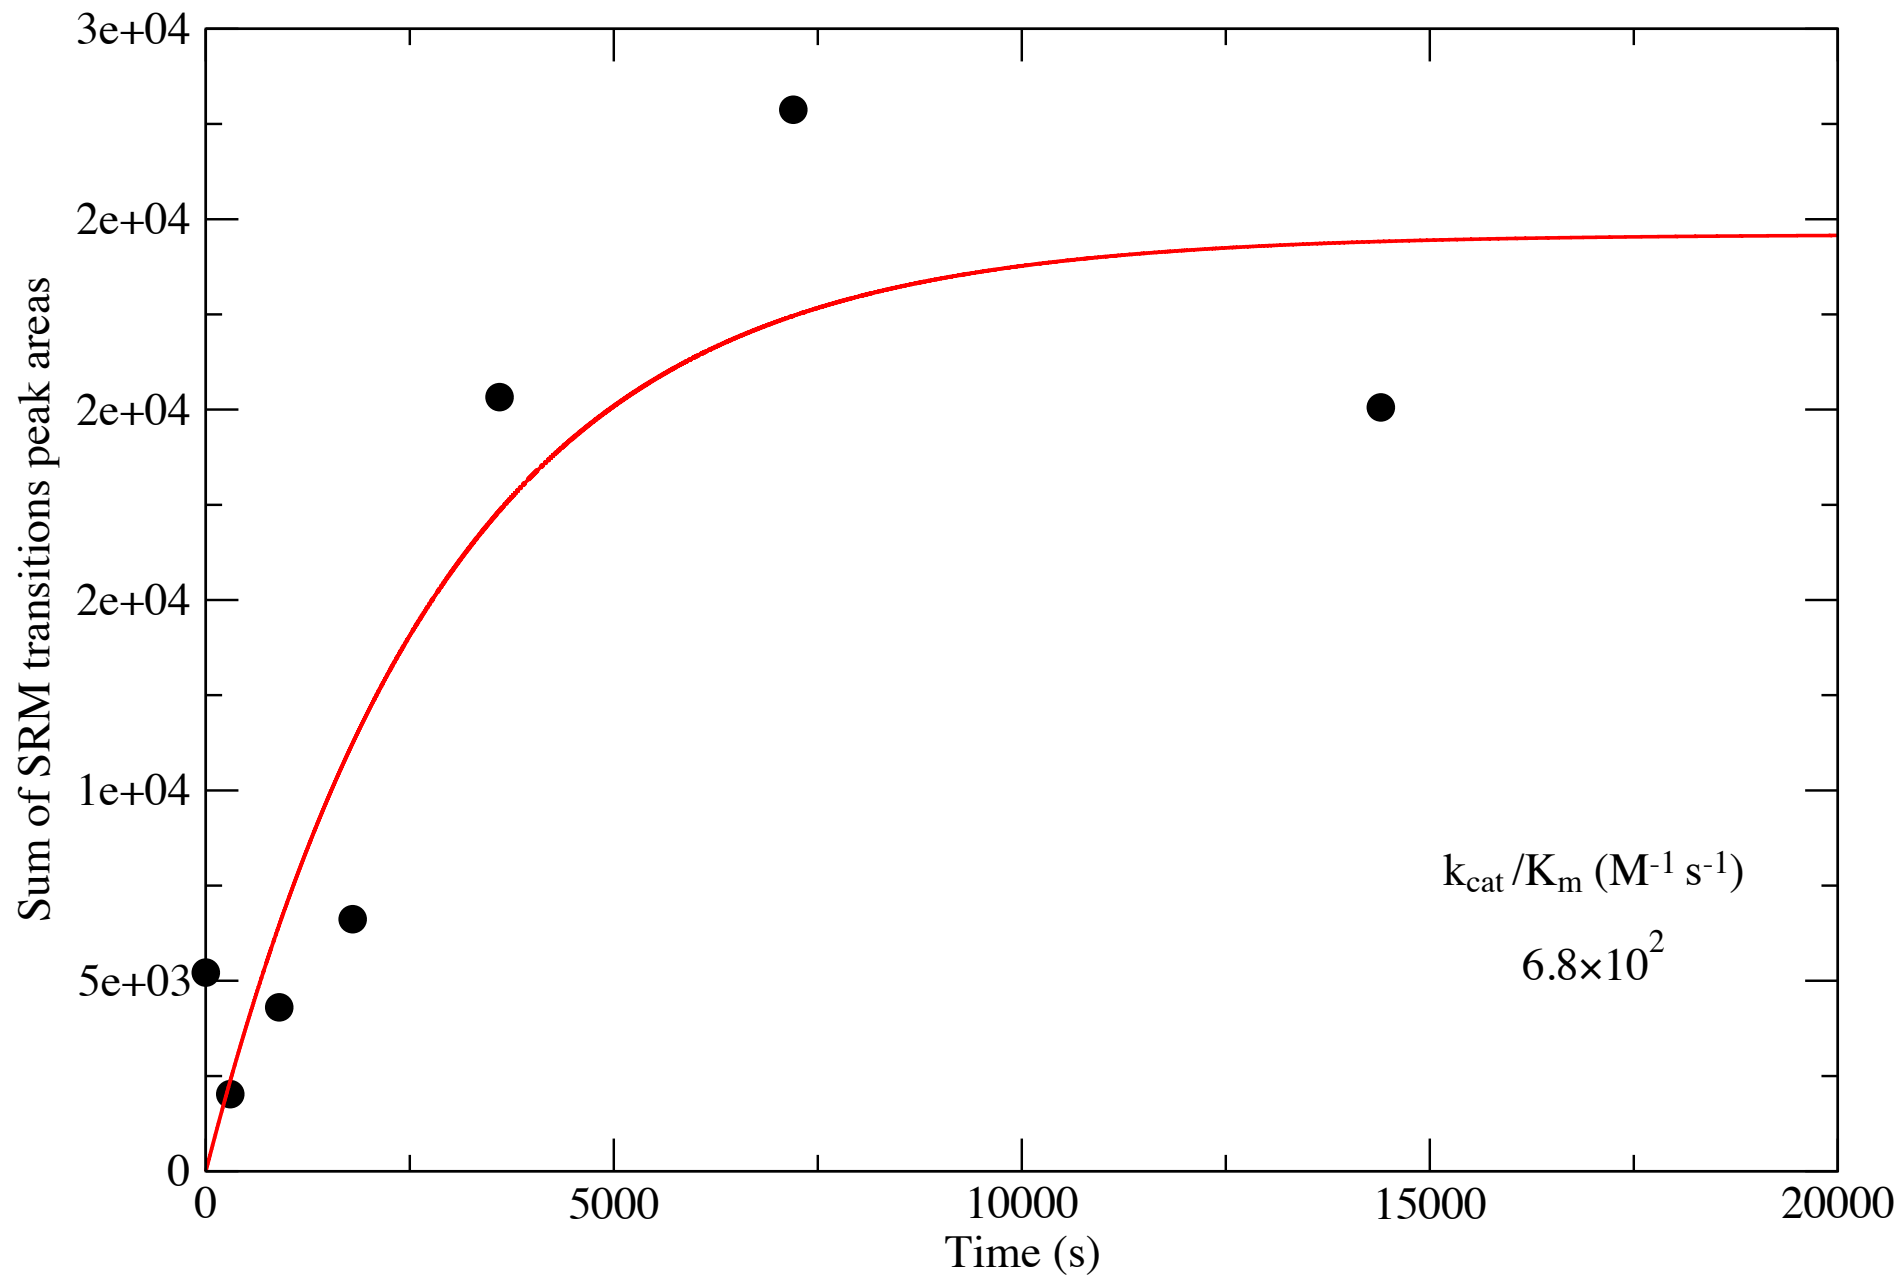

# DFFA\_HUMAN (AVDTGISR)

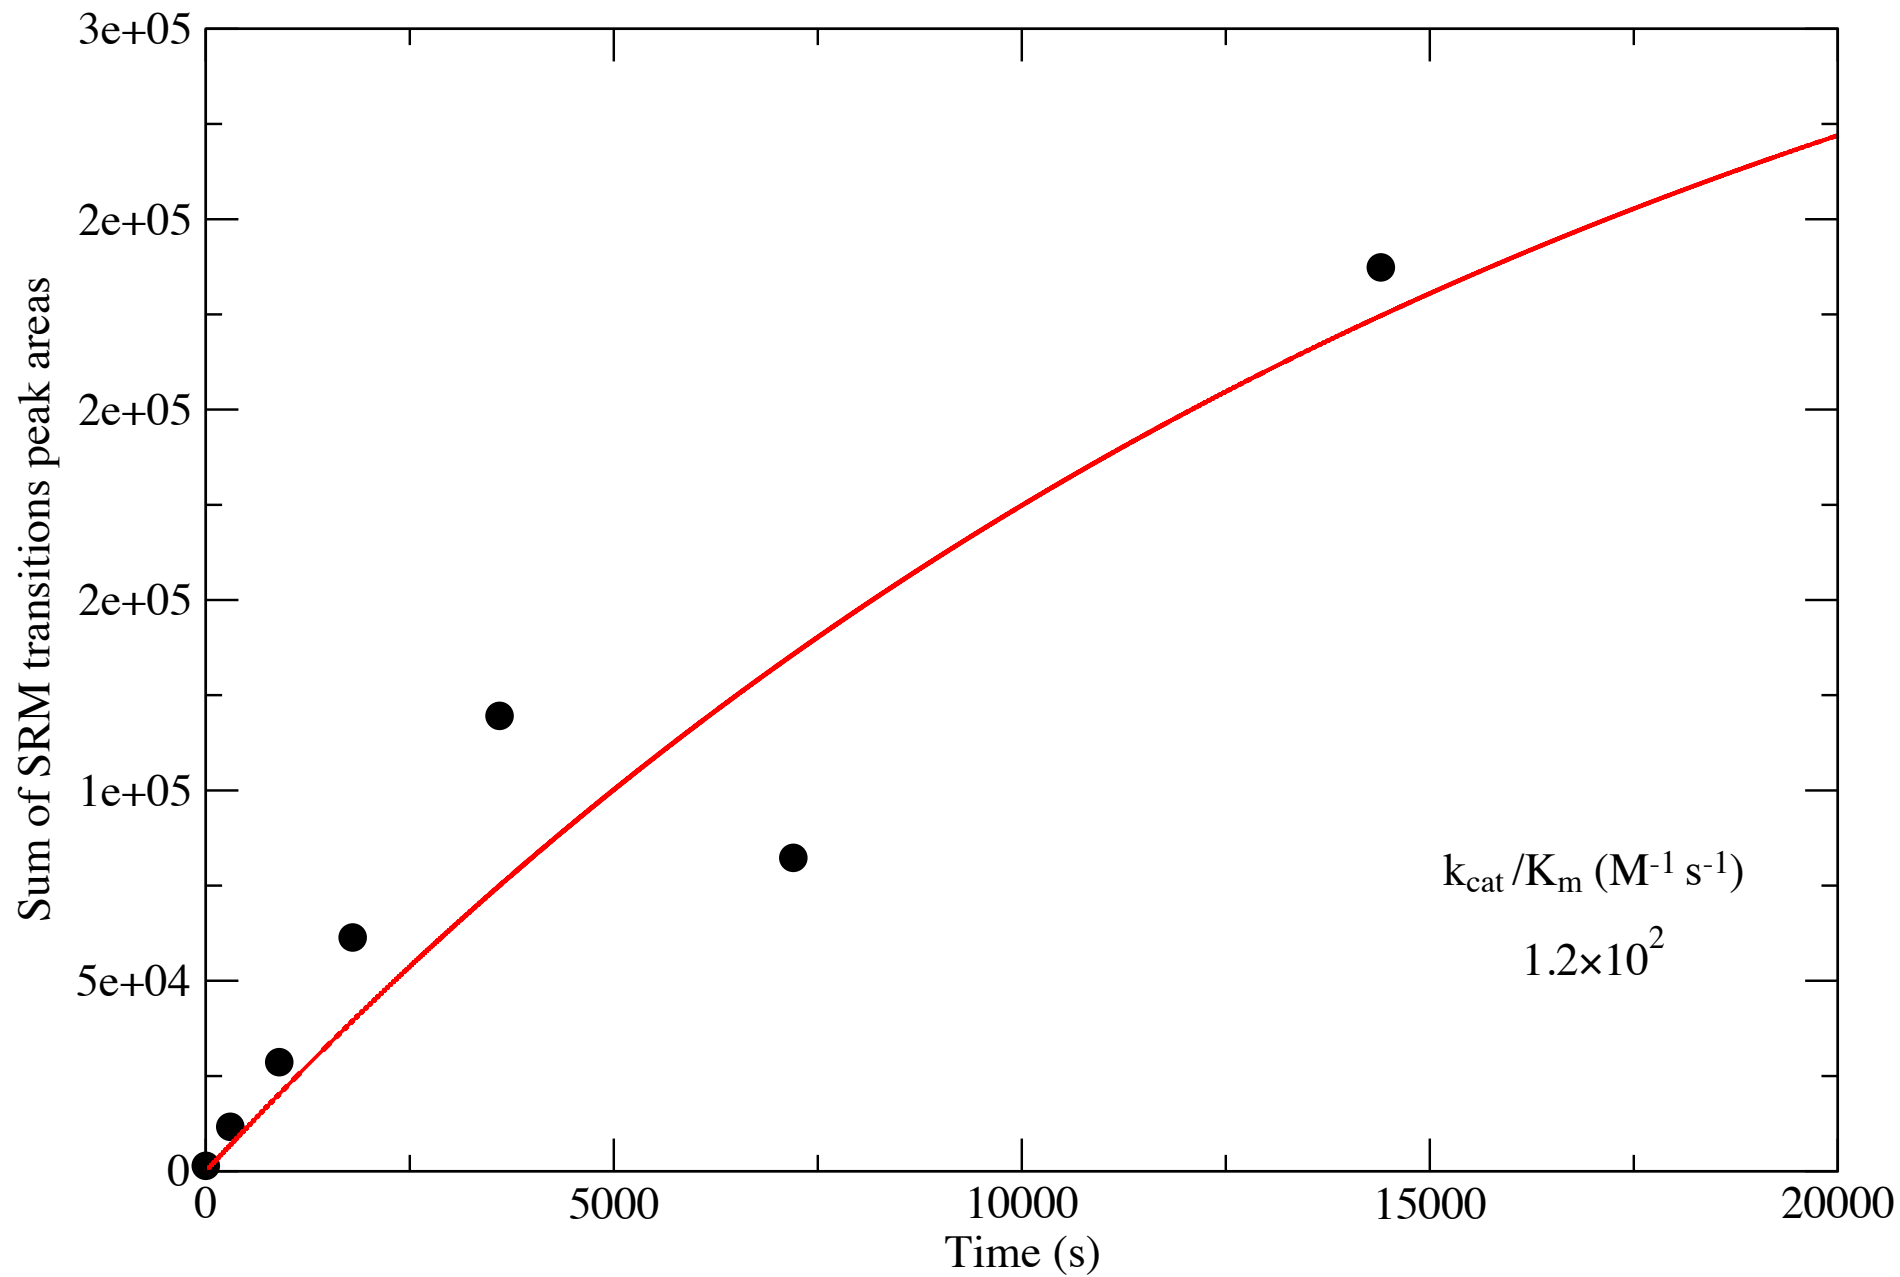

# DGCR8\_HUMAN (ALLEEGLCAPK)

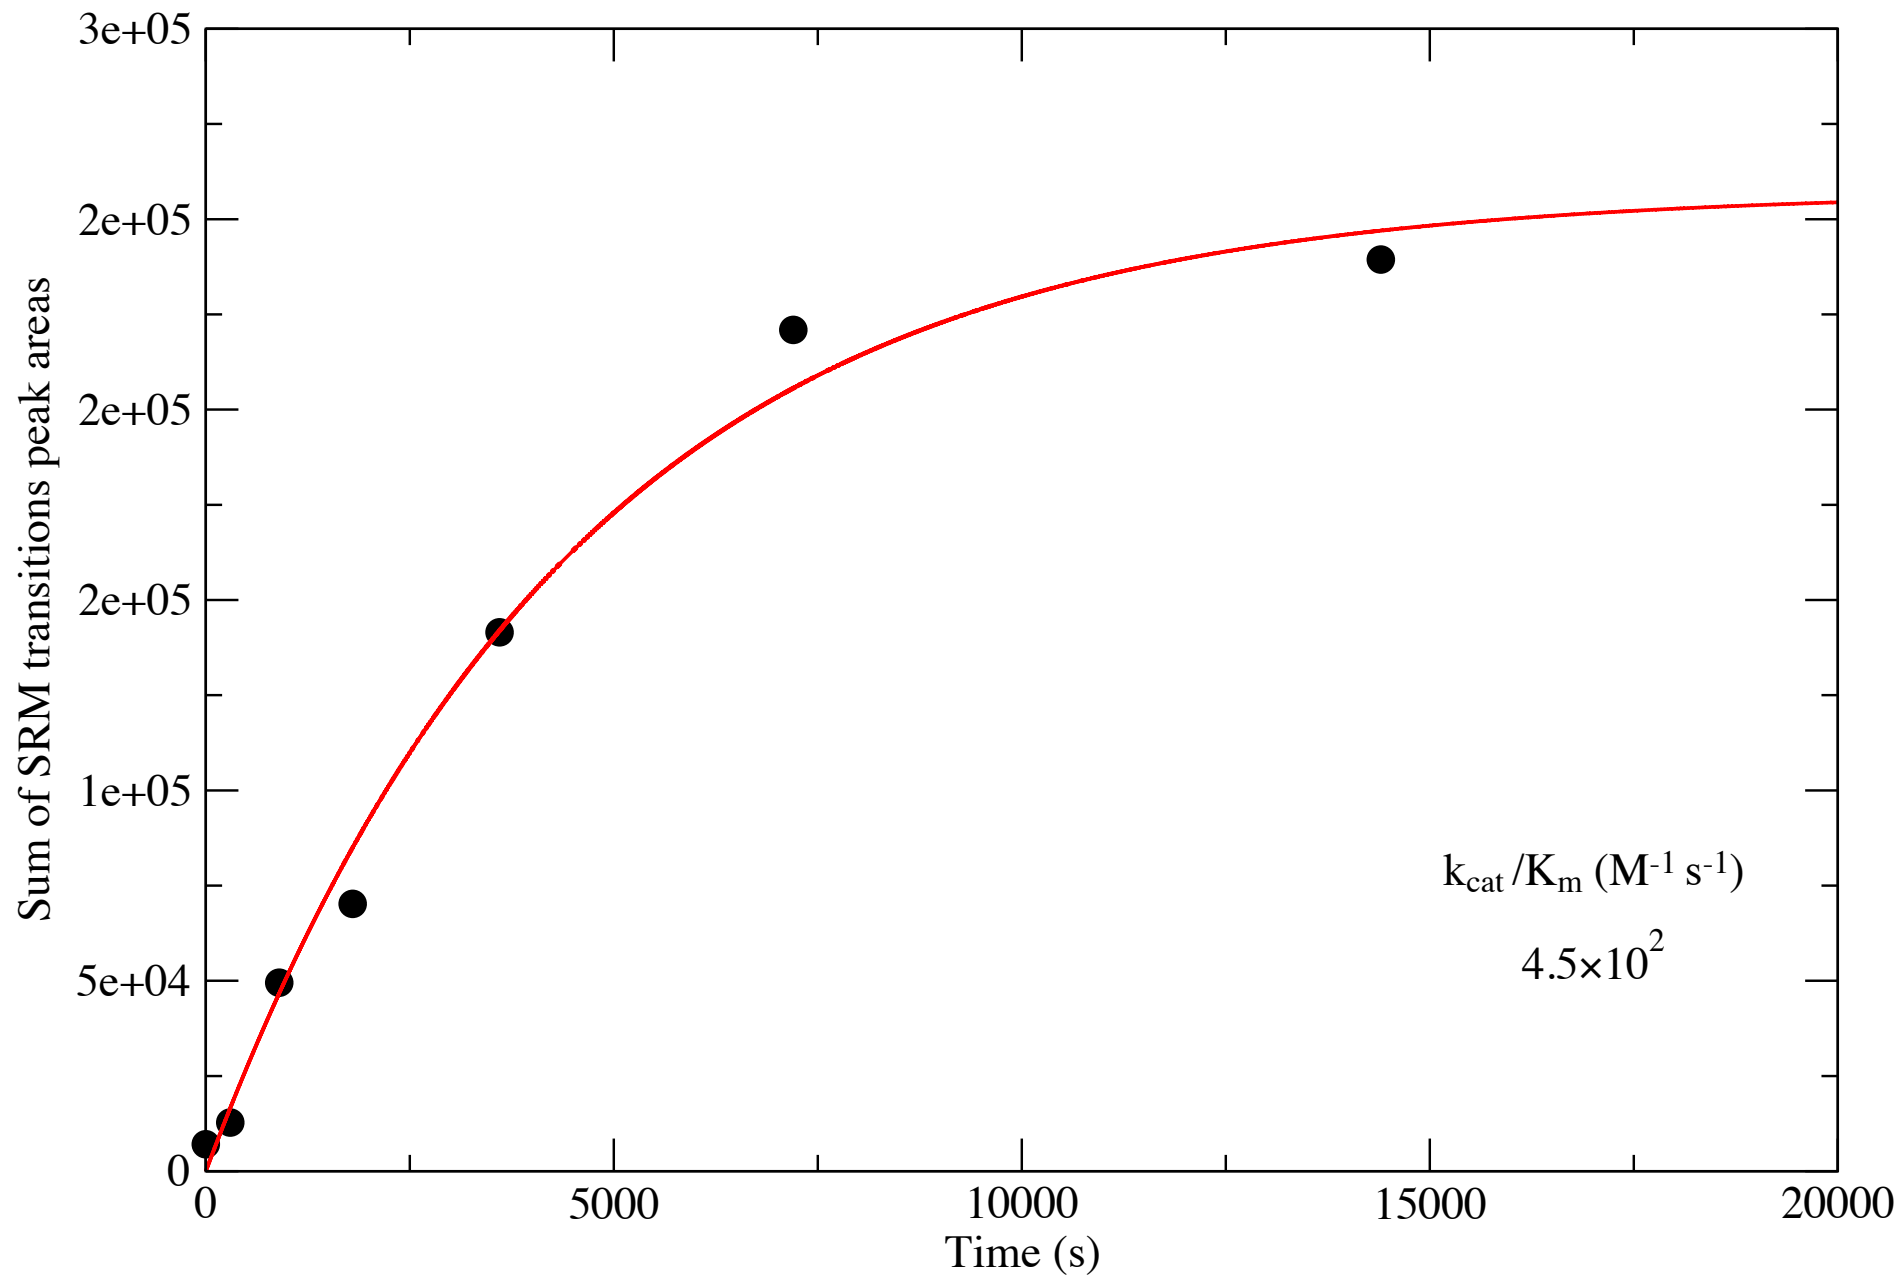

# DGCR8\_HUMAN (SMGADPGPPDEKDPPLGAEAAPGALGQVK)

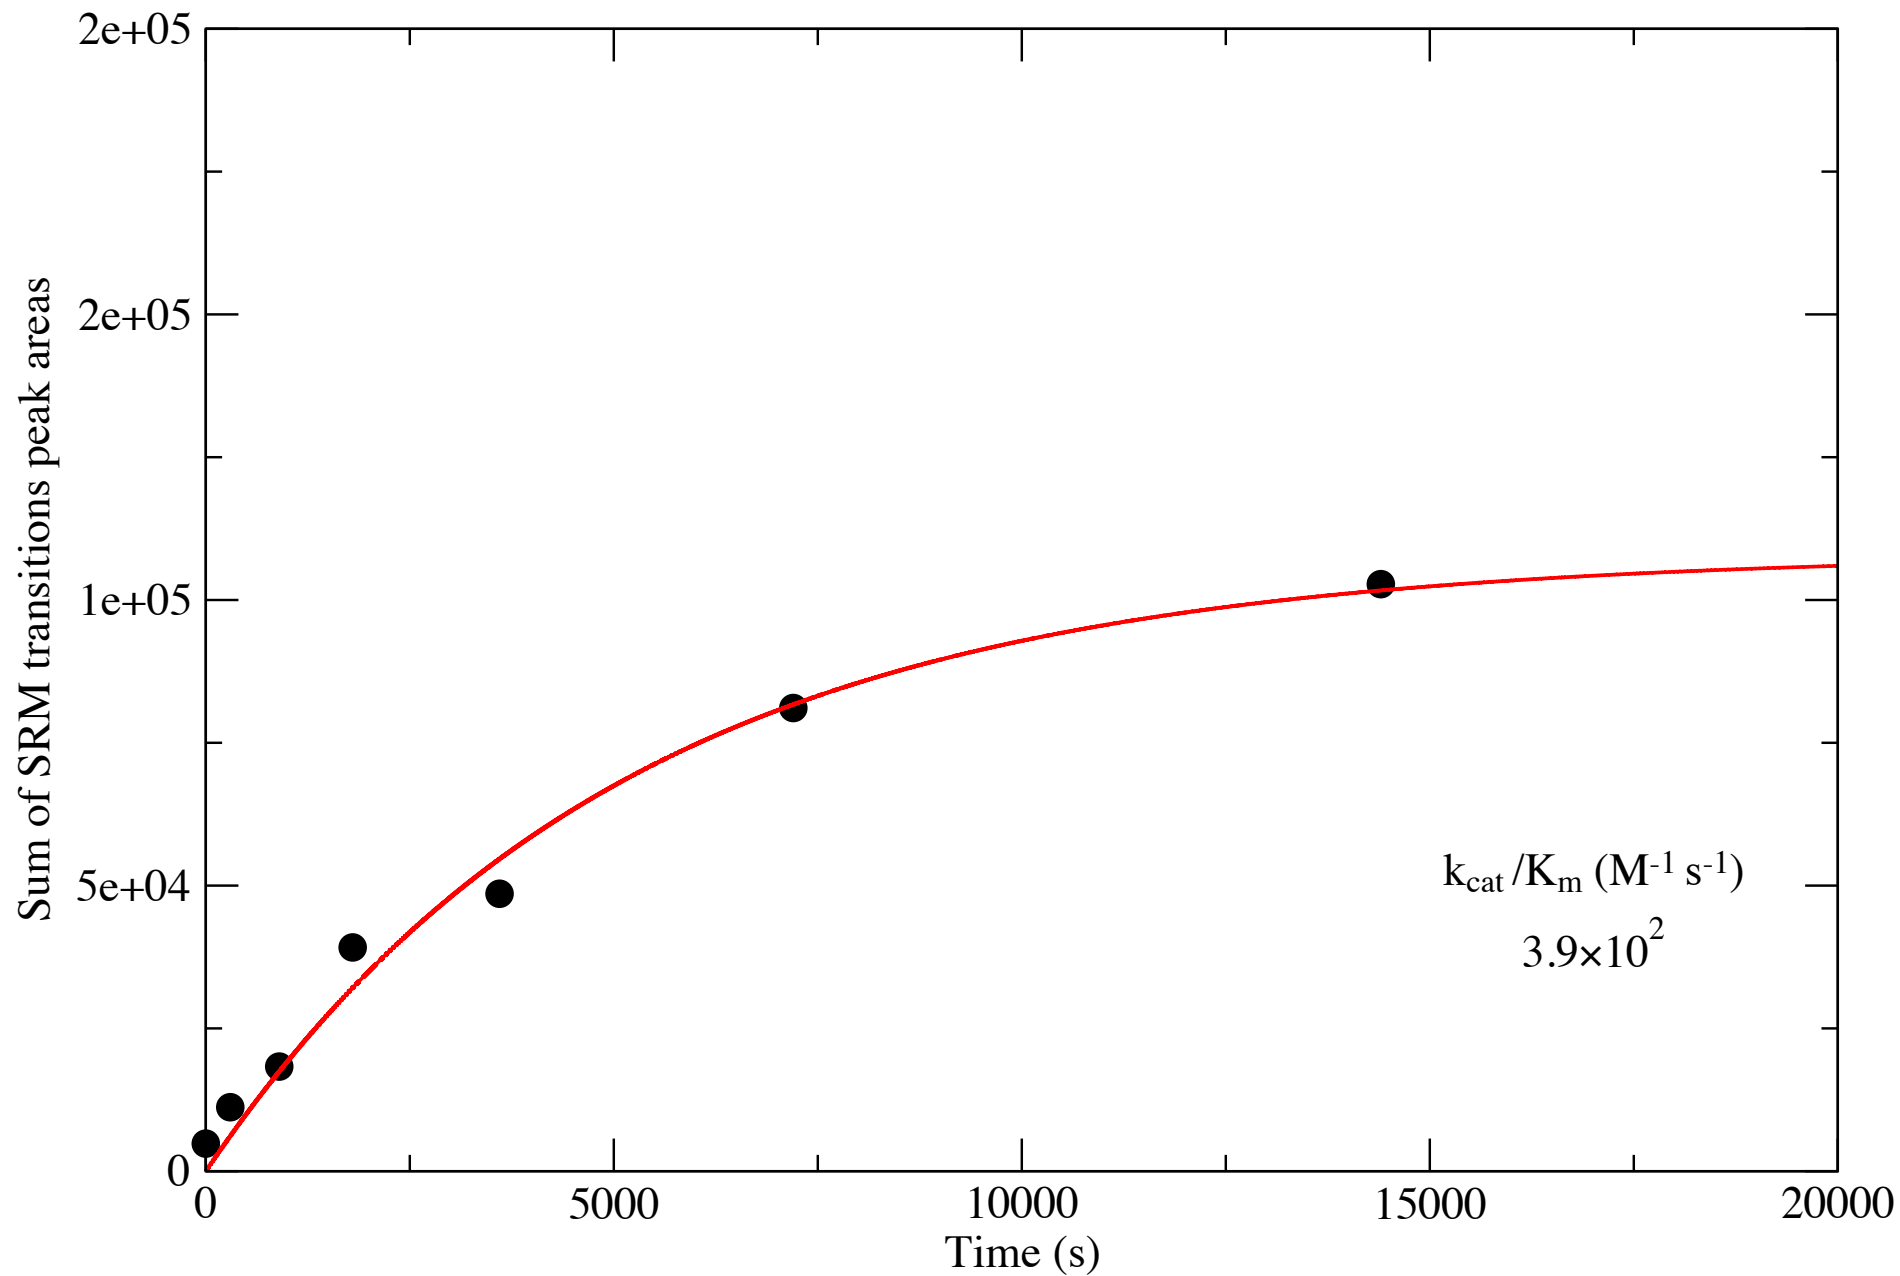



# DGKH\_HUMAN (SVPGPAVAASKENLPVLNTR)

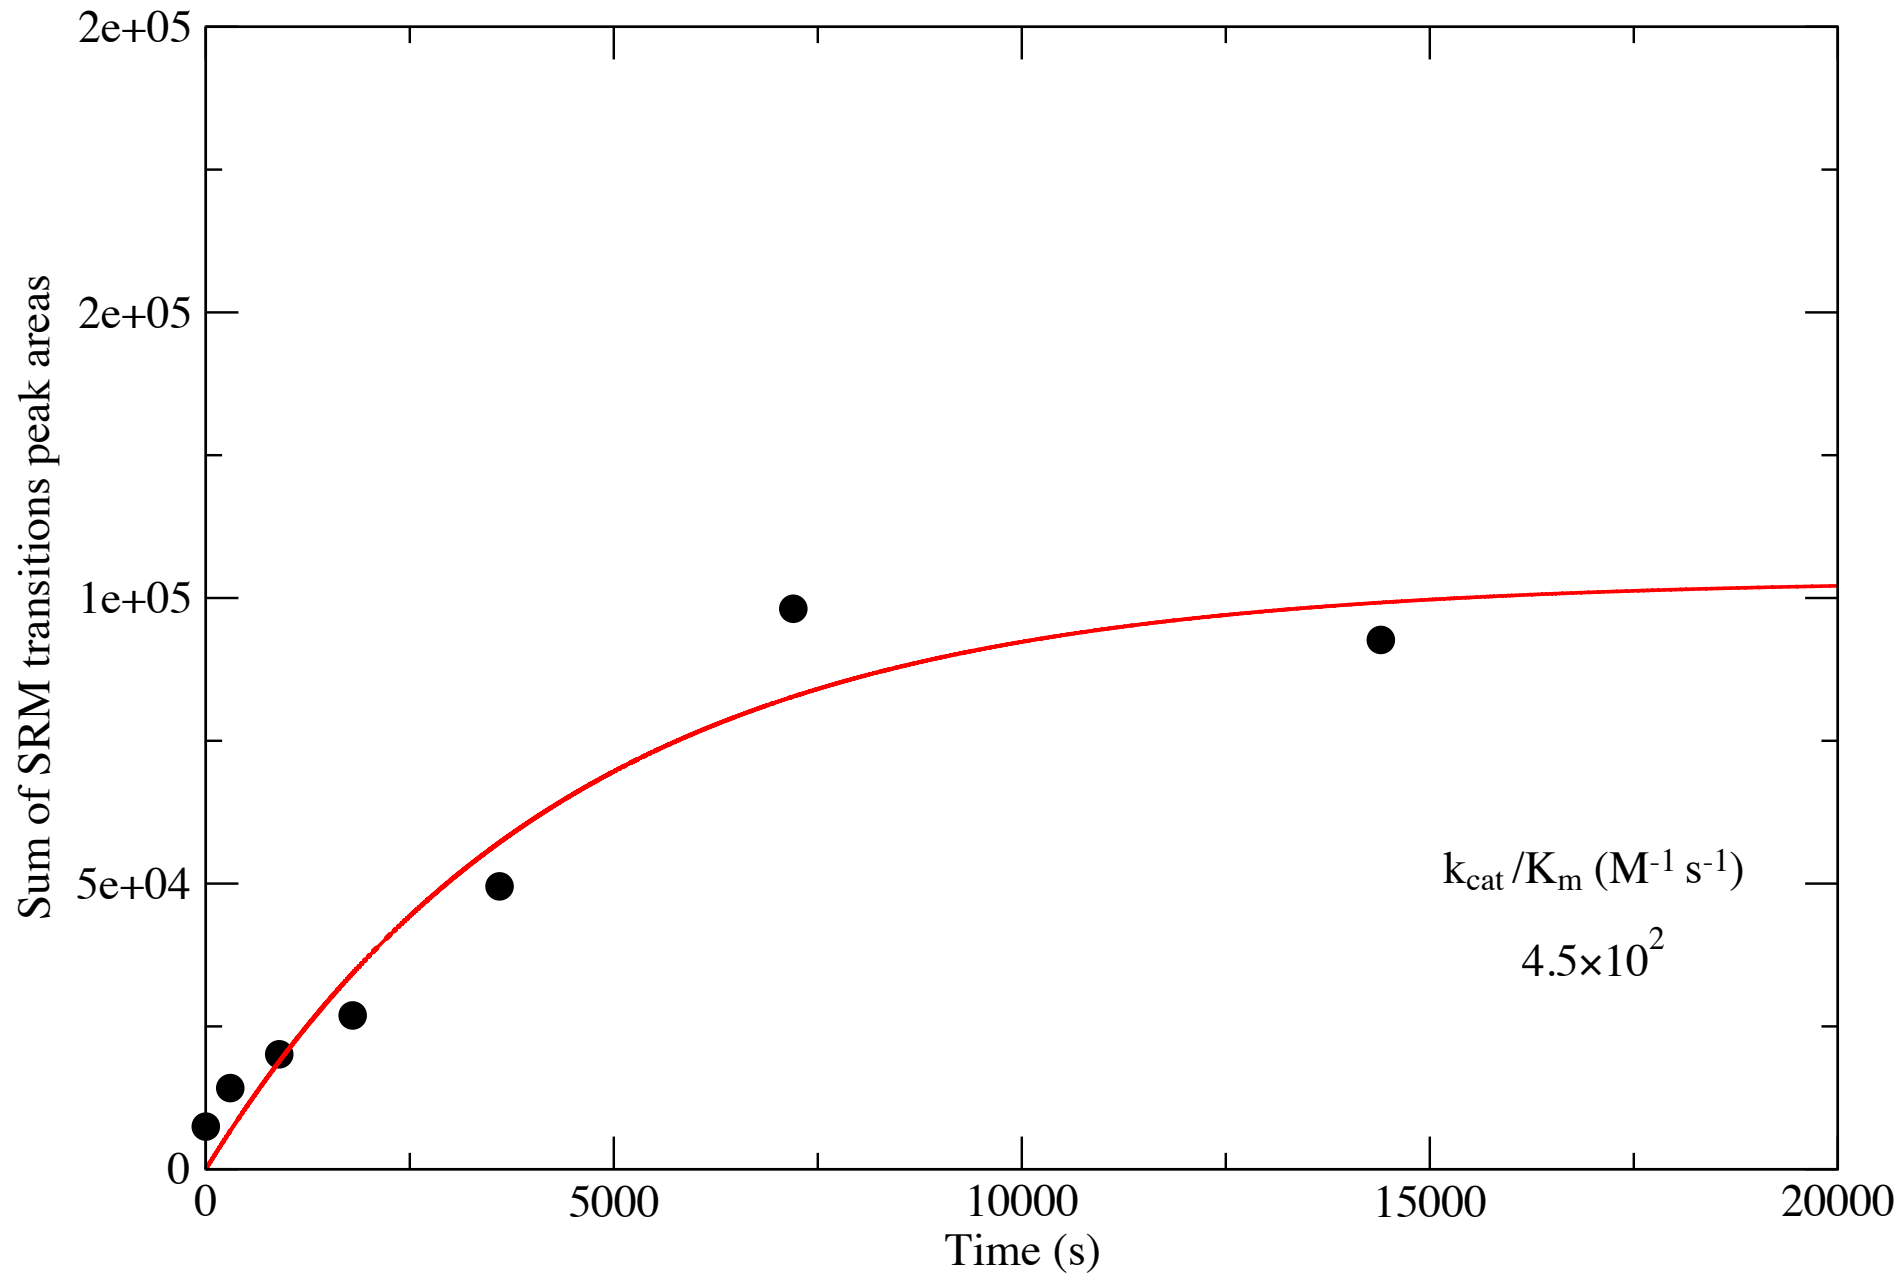

# DGLB\_HUMAN (GGDQEVLTQPLLGEQSLLTR)

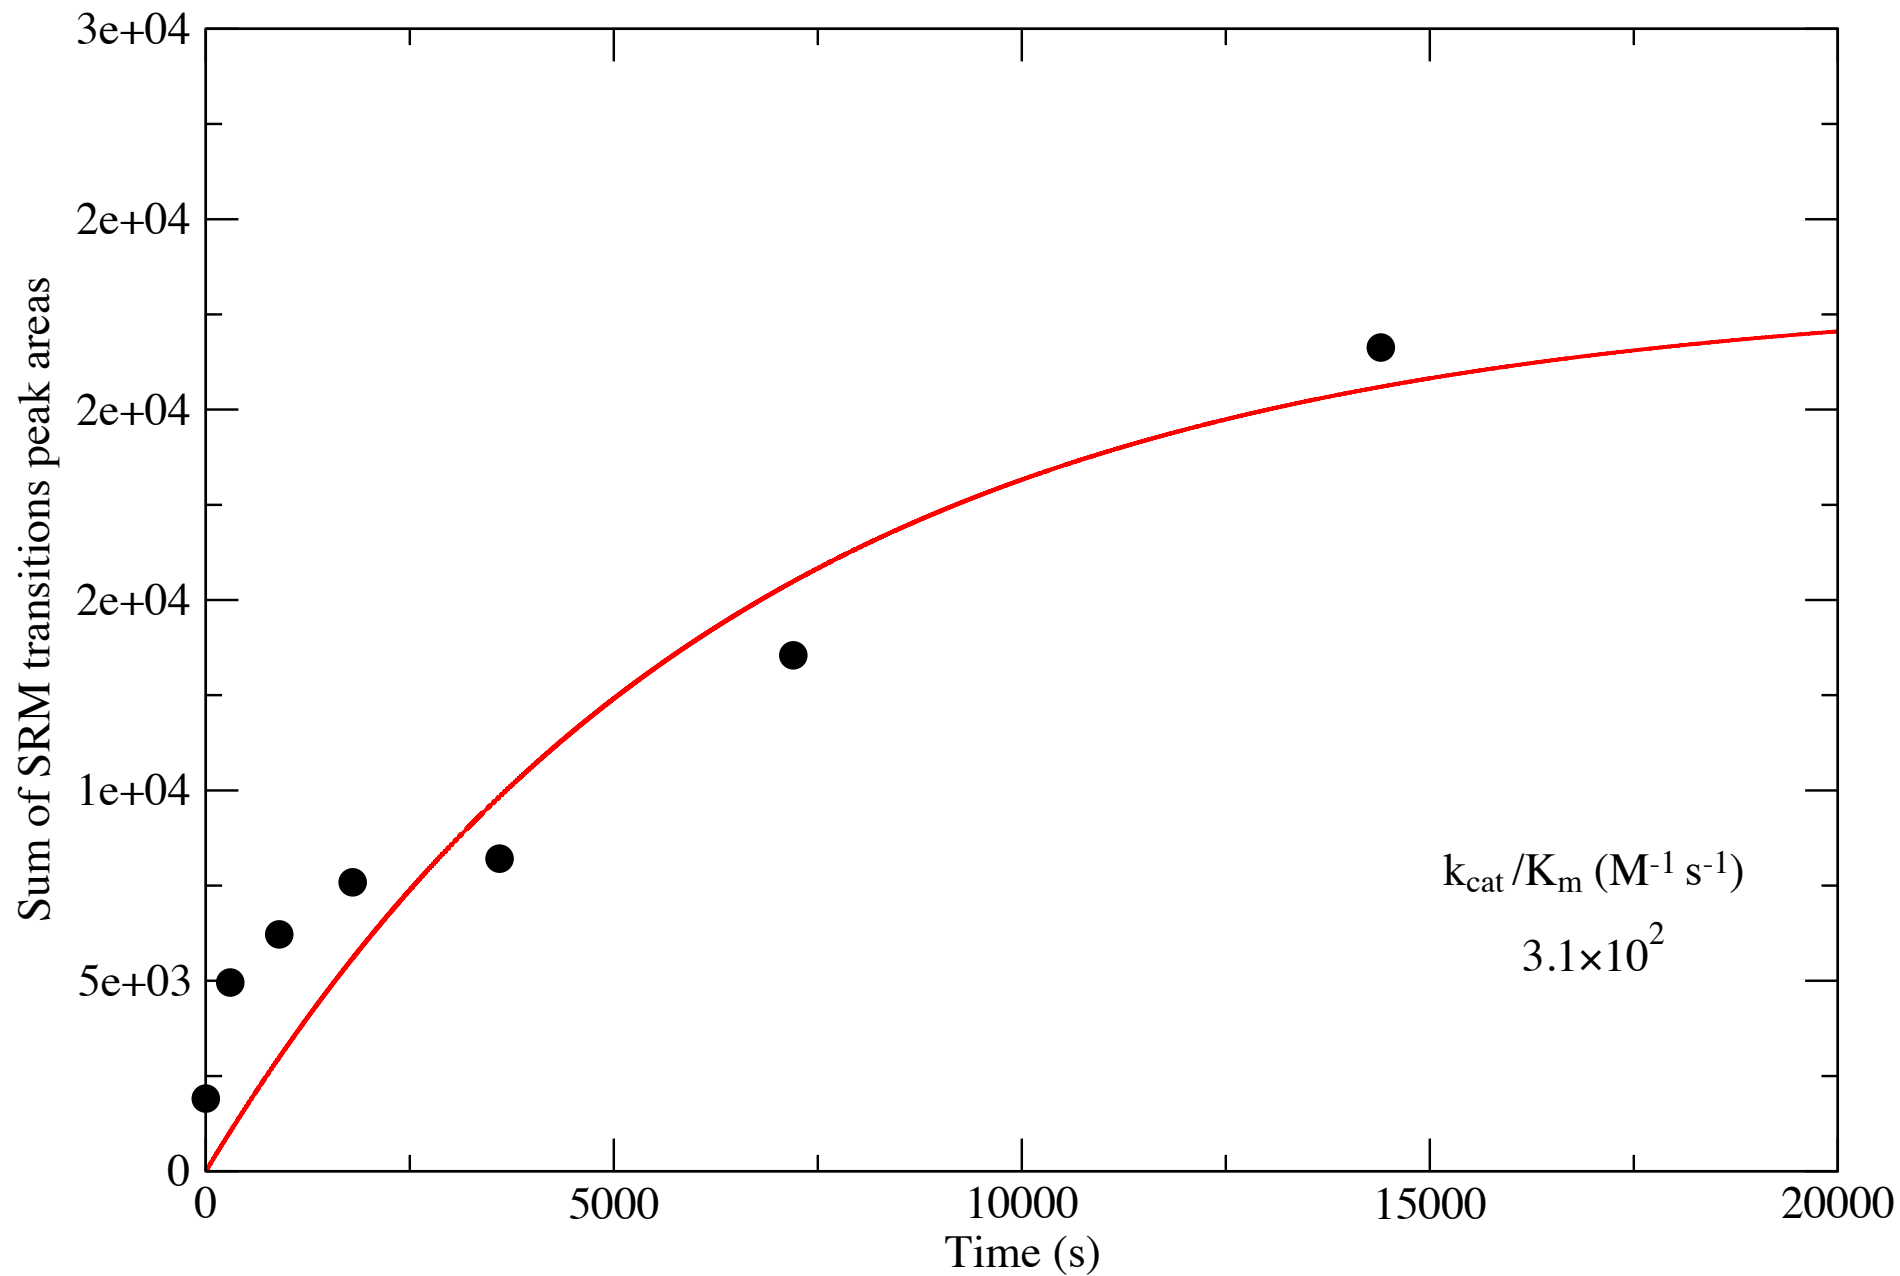

# DHX8\_HUMAN (SIPMGLNKHVVDPLPDAEGR)

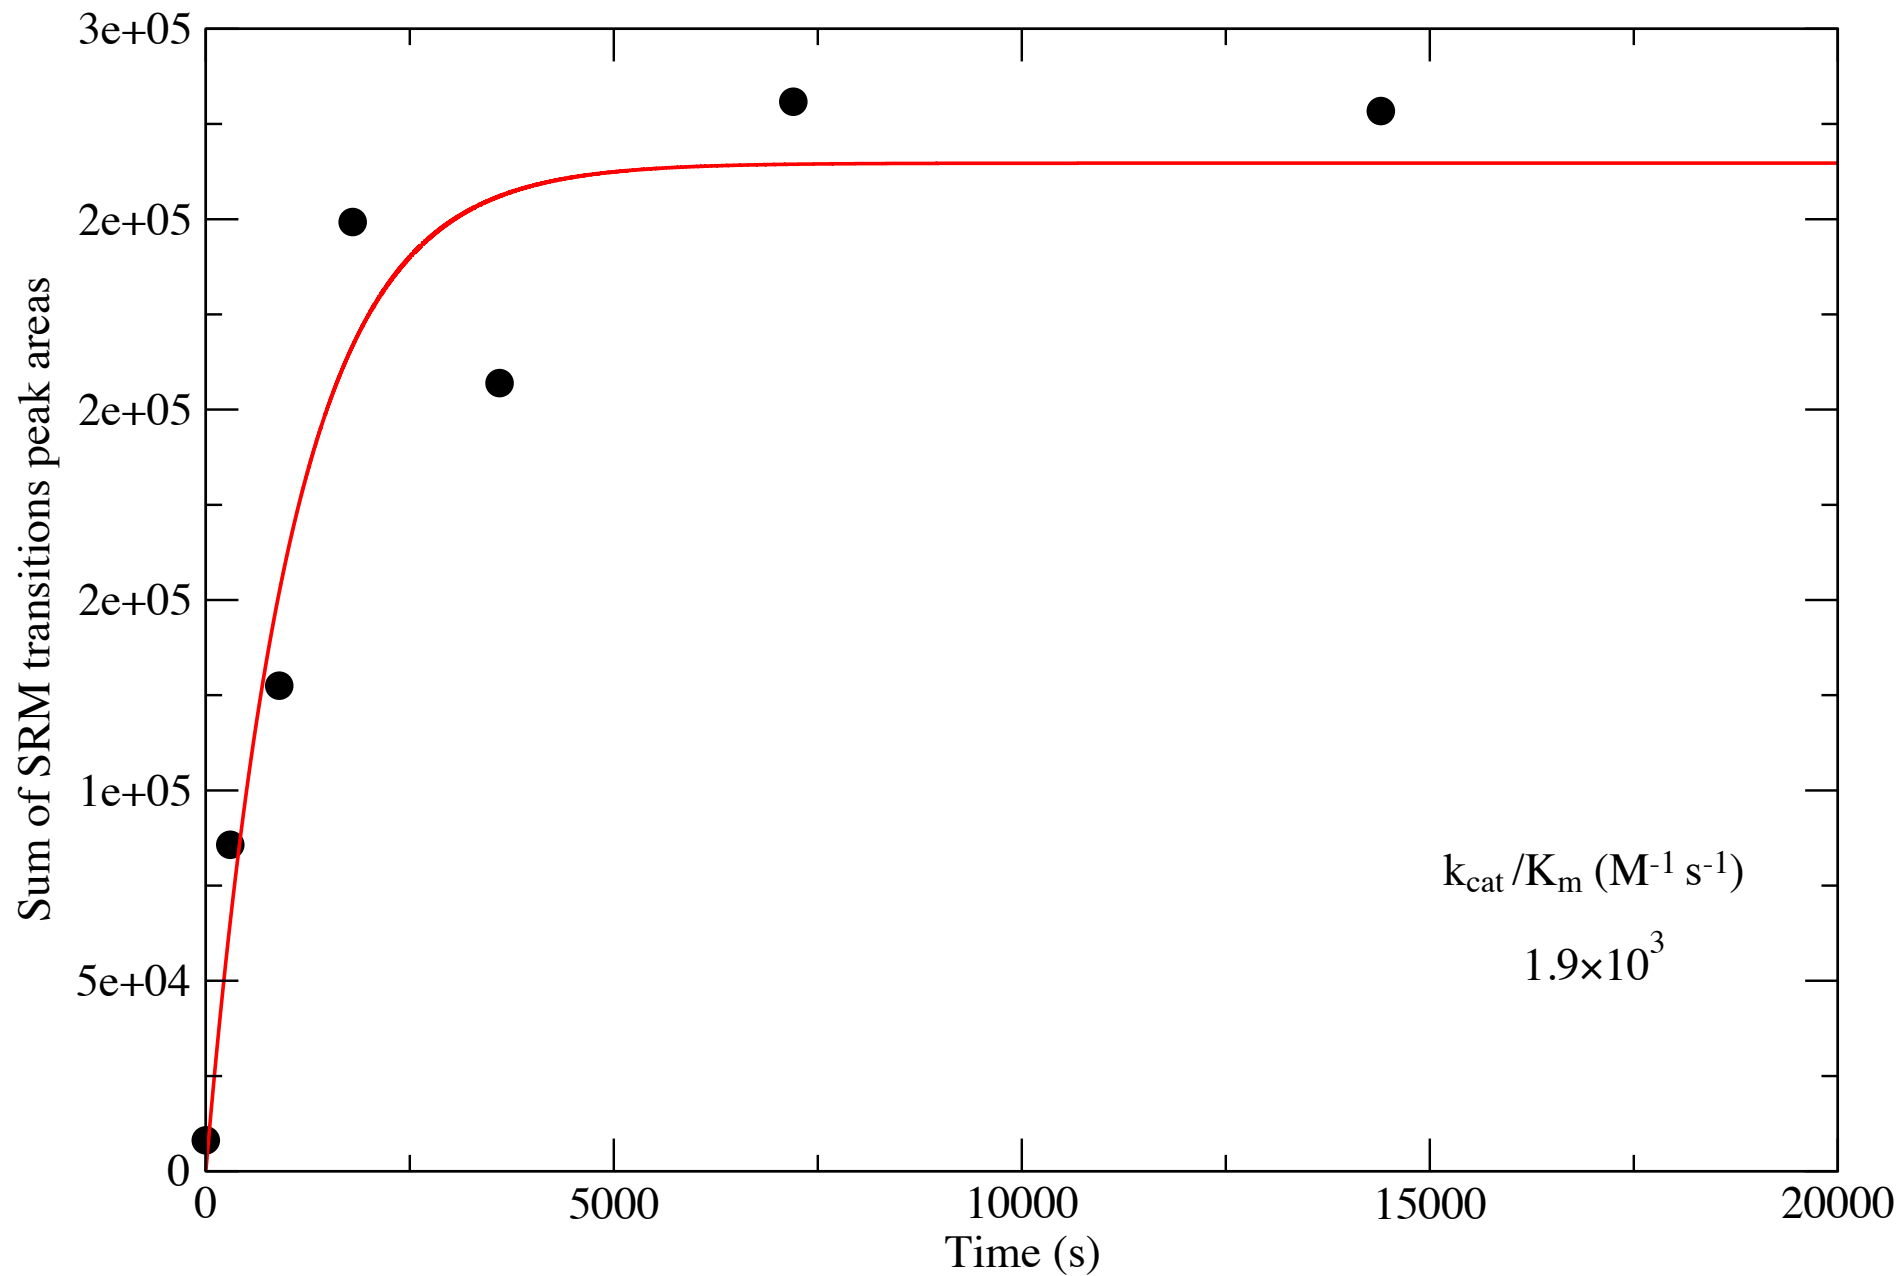

# DMXL2\_HUMAN (AVGLVMK)

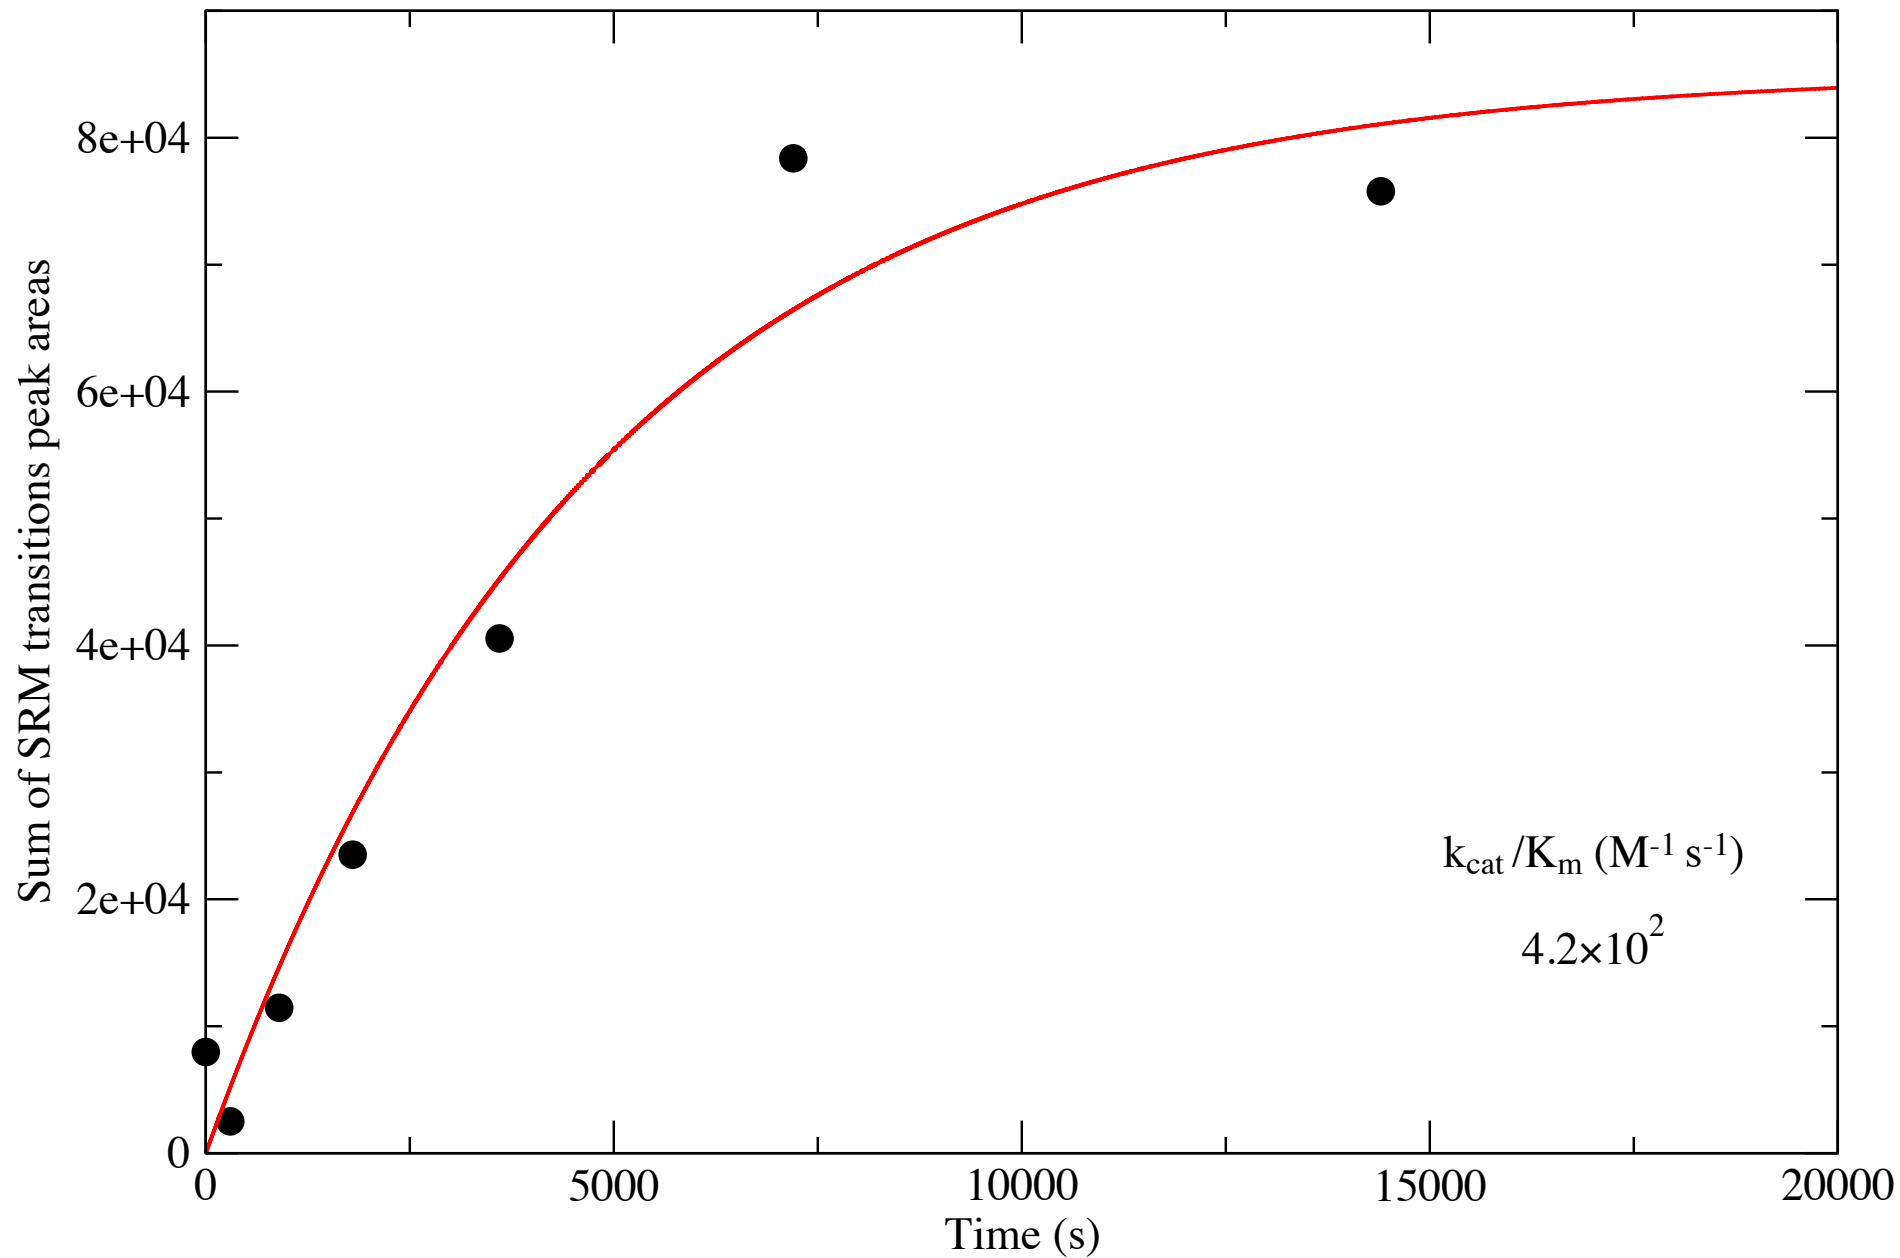

# DOHH\_HUMAN (AIGQTLVDPKQPLQAR)

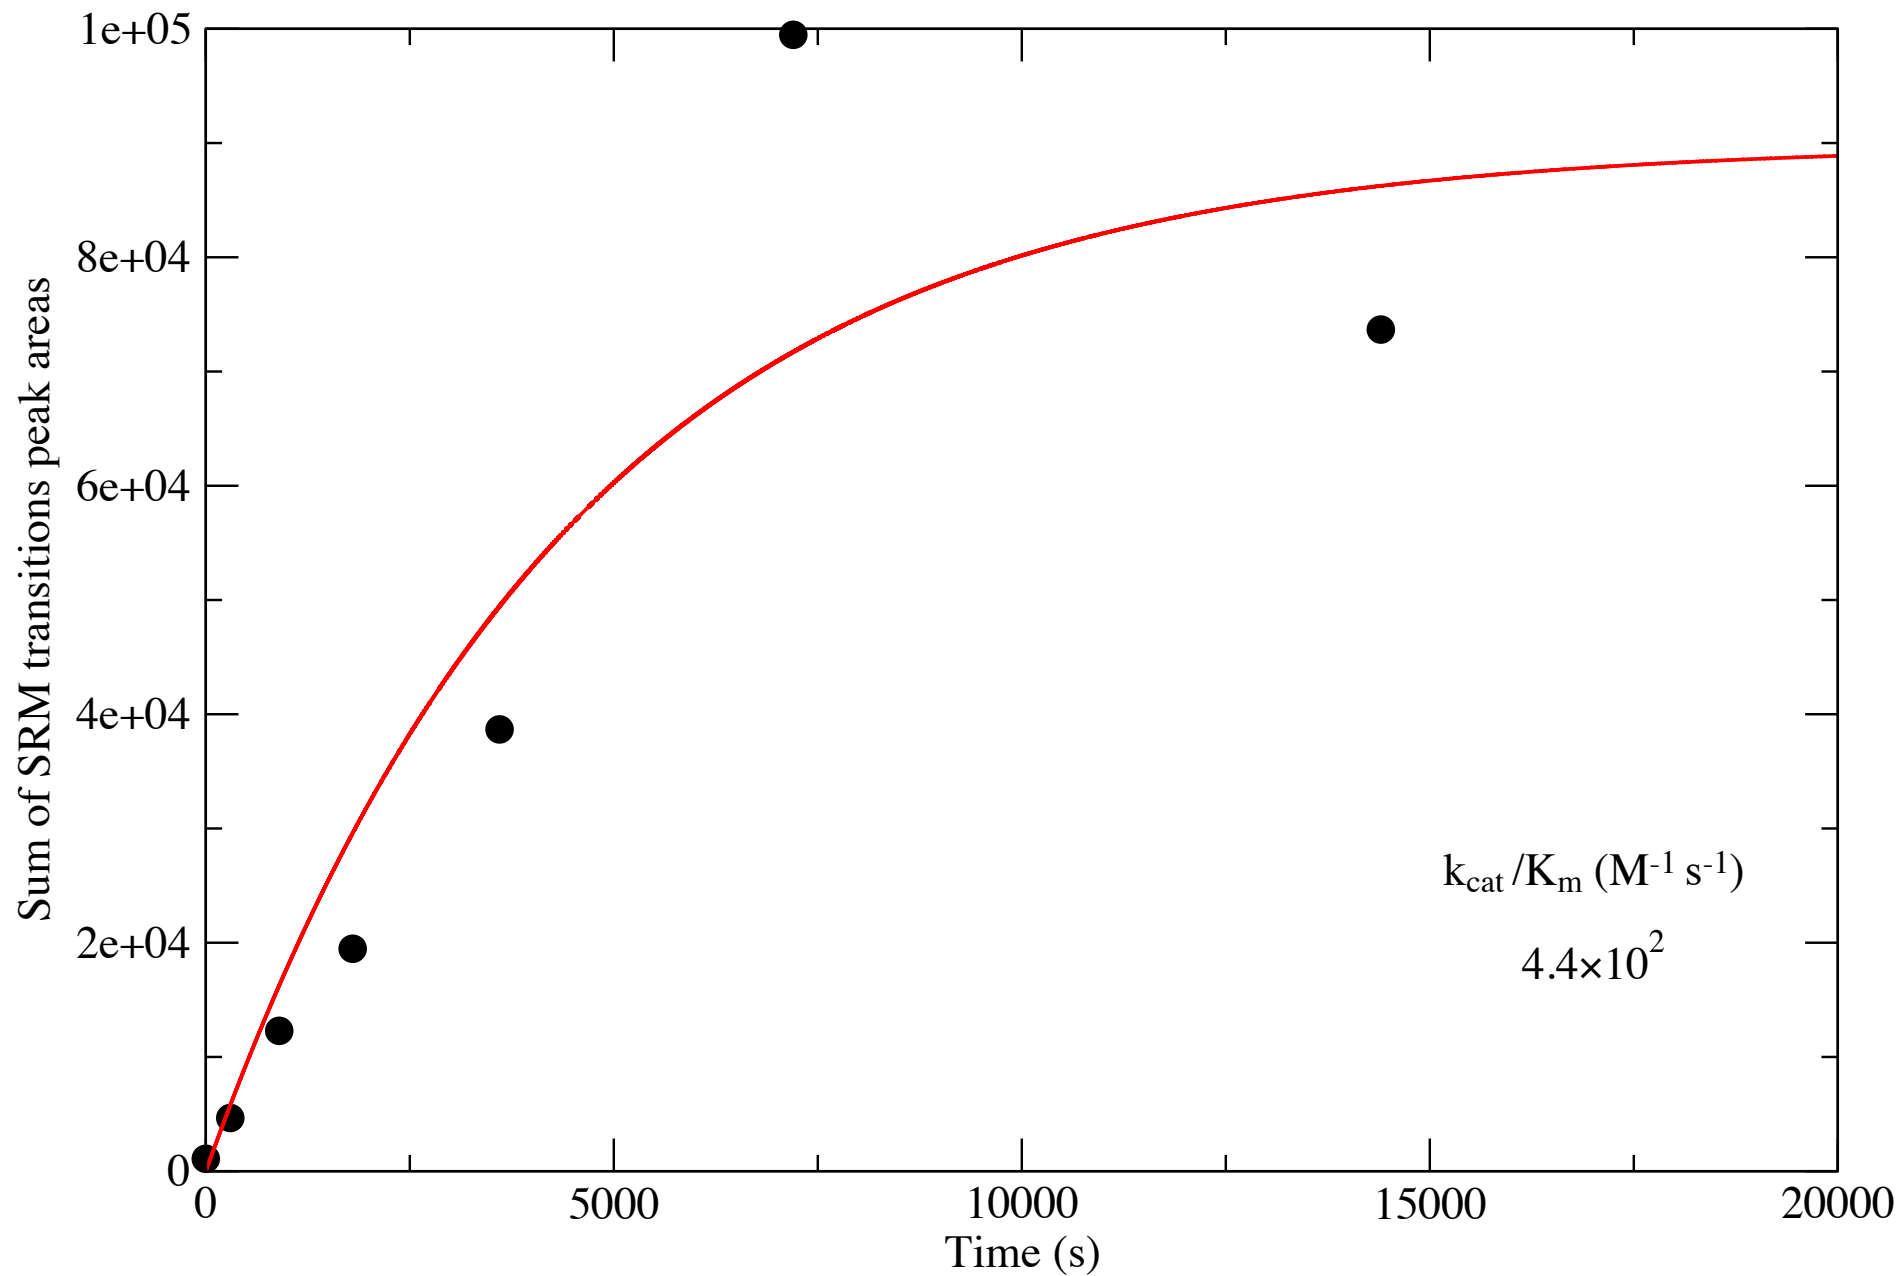

# DPOD3\_HUMAN (GEGCIVTEK)

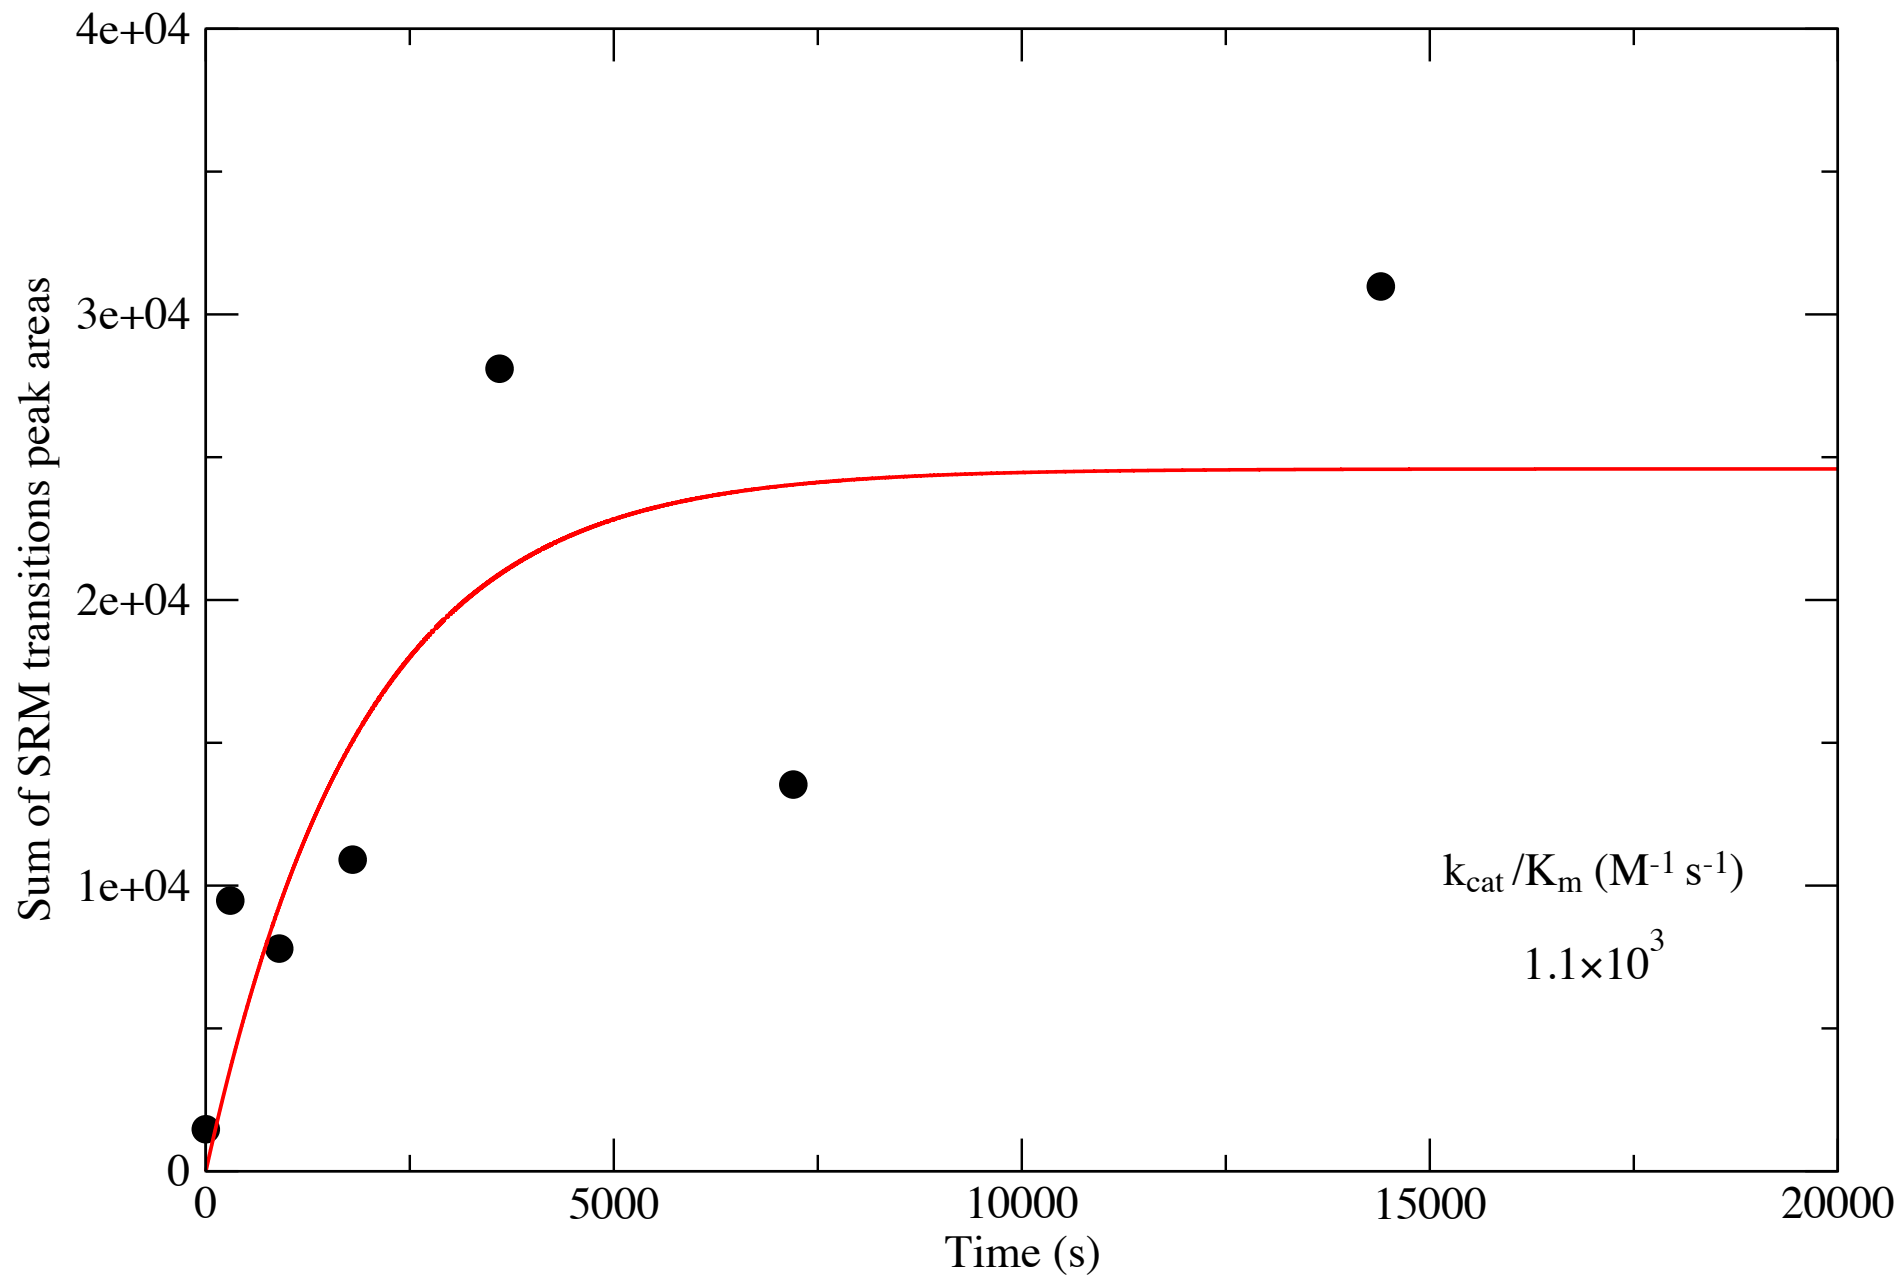

# DPOLA\_HUMAN (GIGYVEDGR)

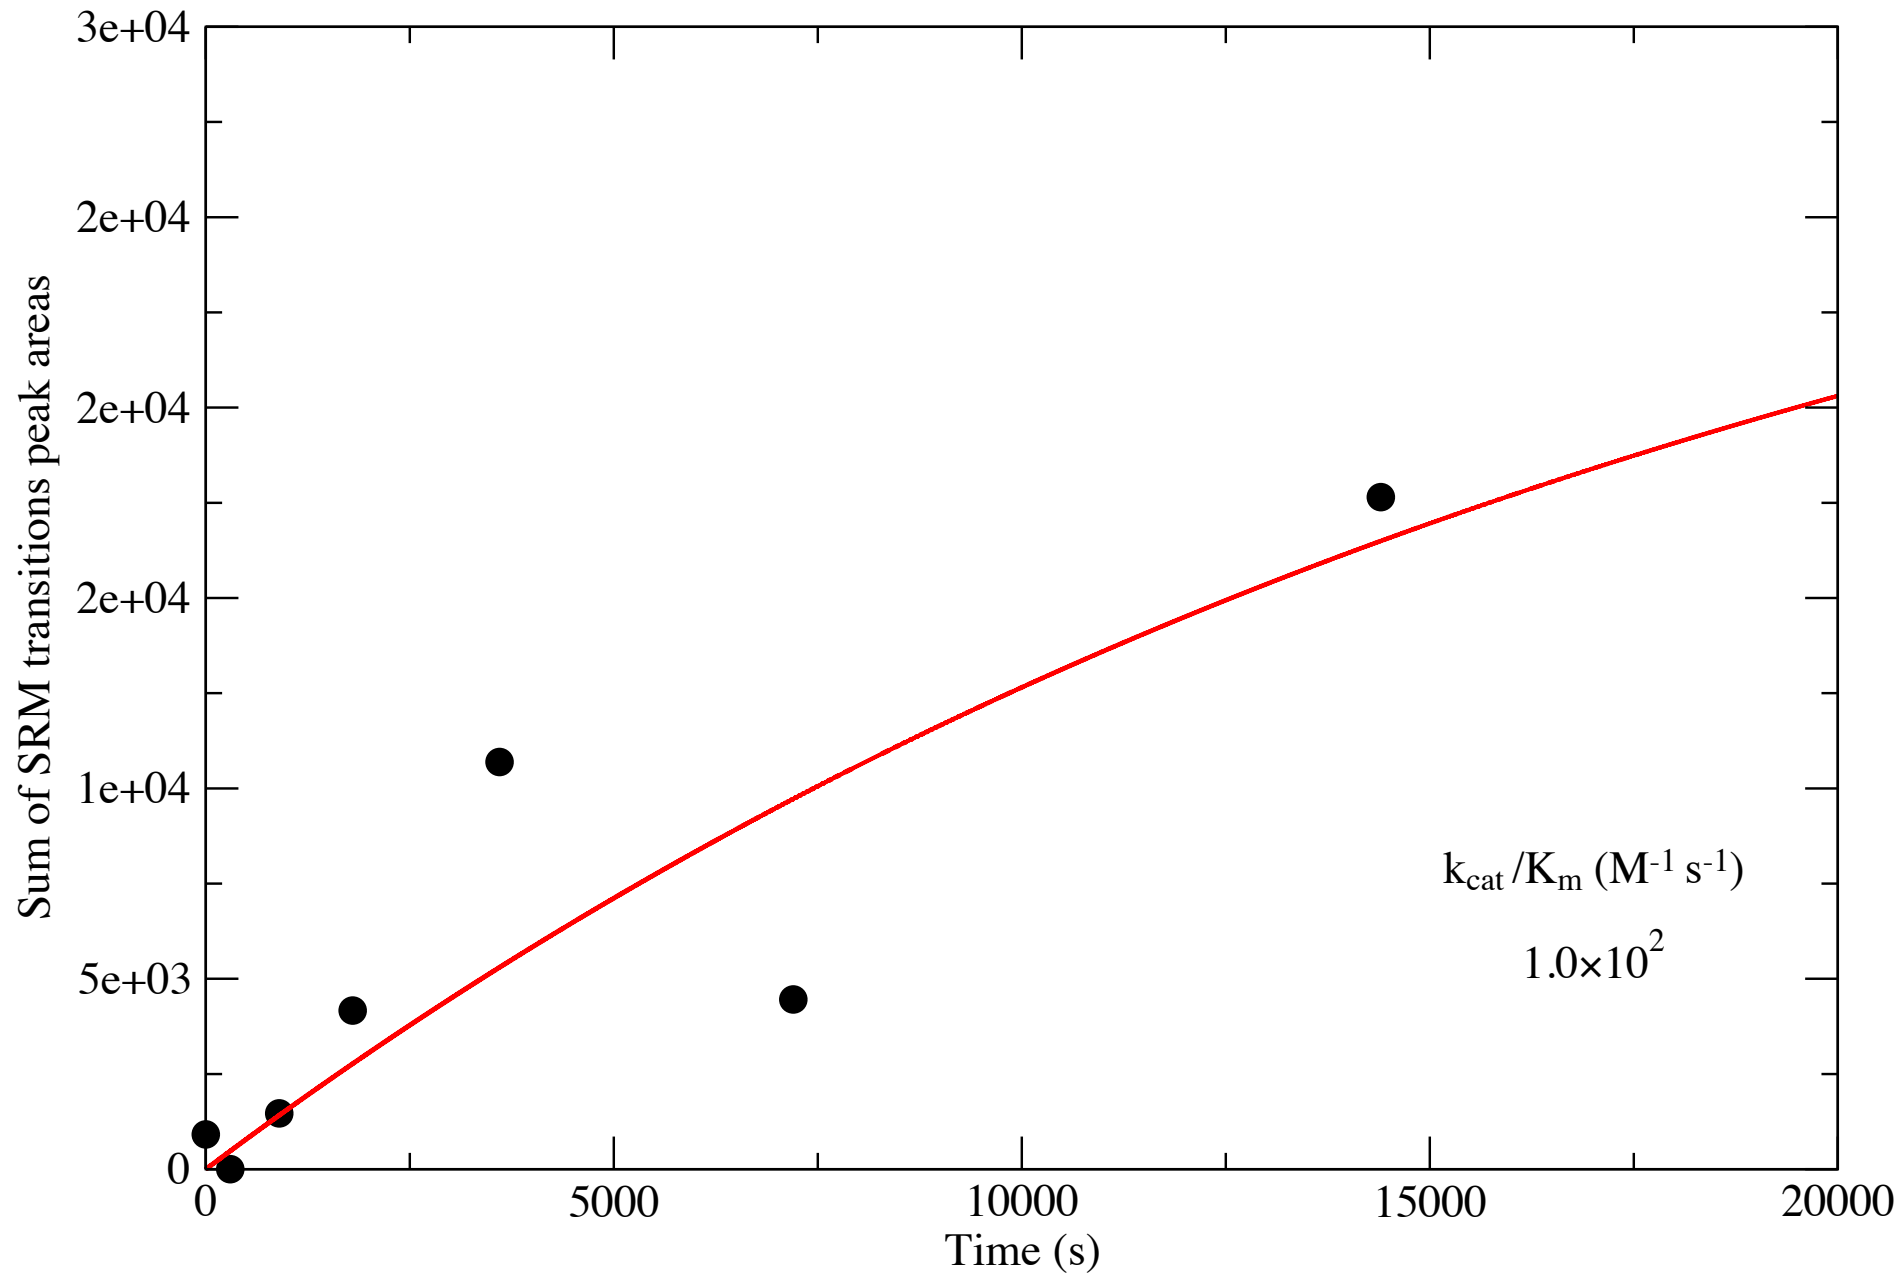

# DSG2\_HUMAN (SVTSEIK)

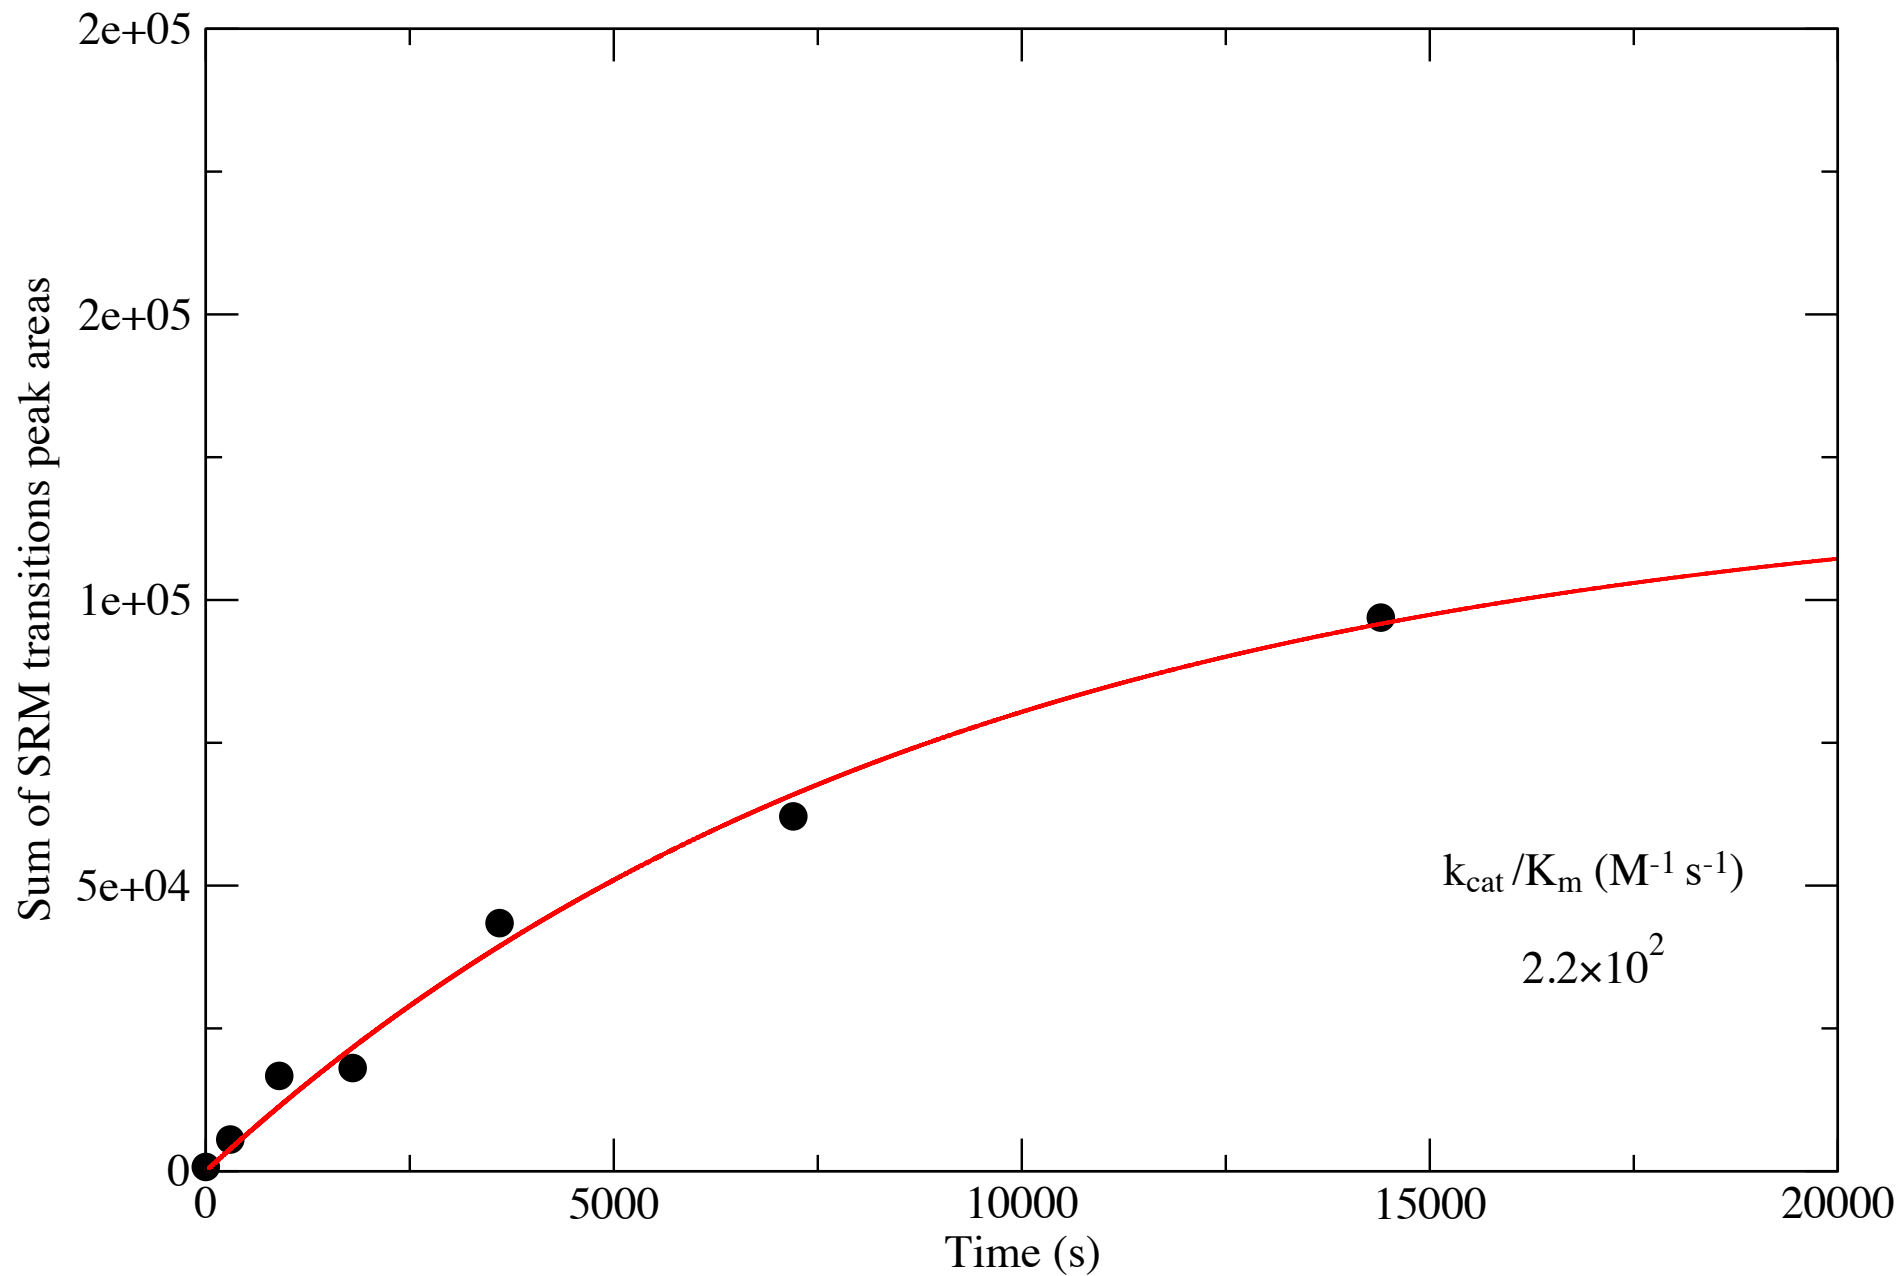



# DTX3L\_HUMAN (SCISPSEPETK)

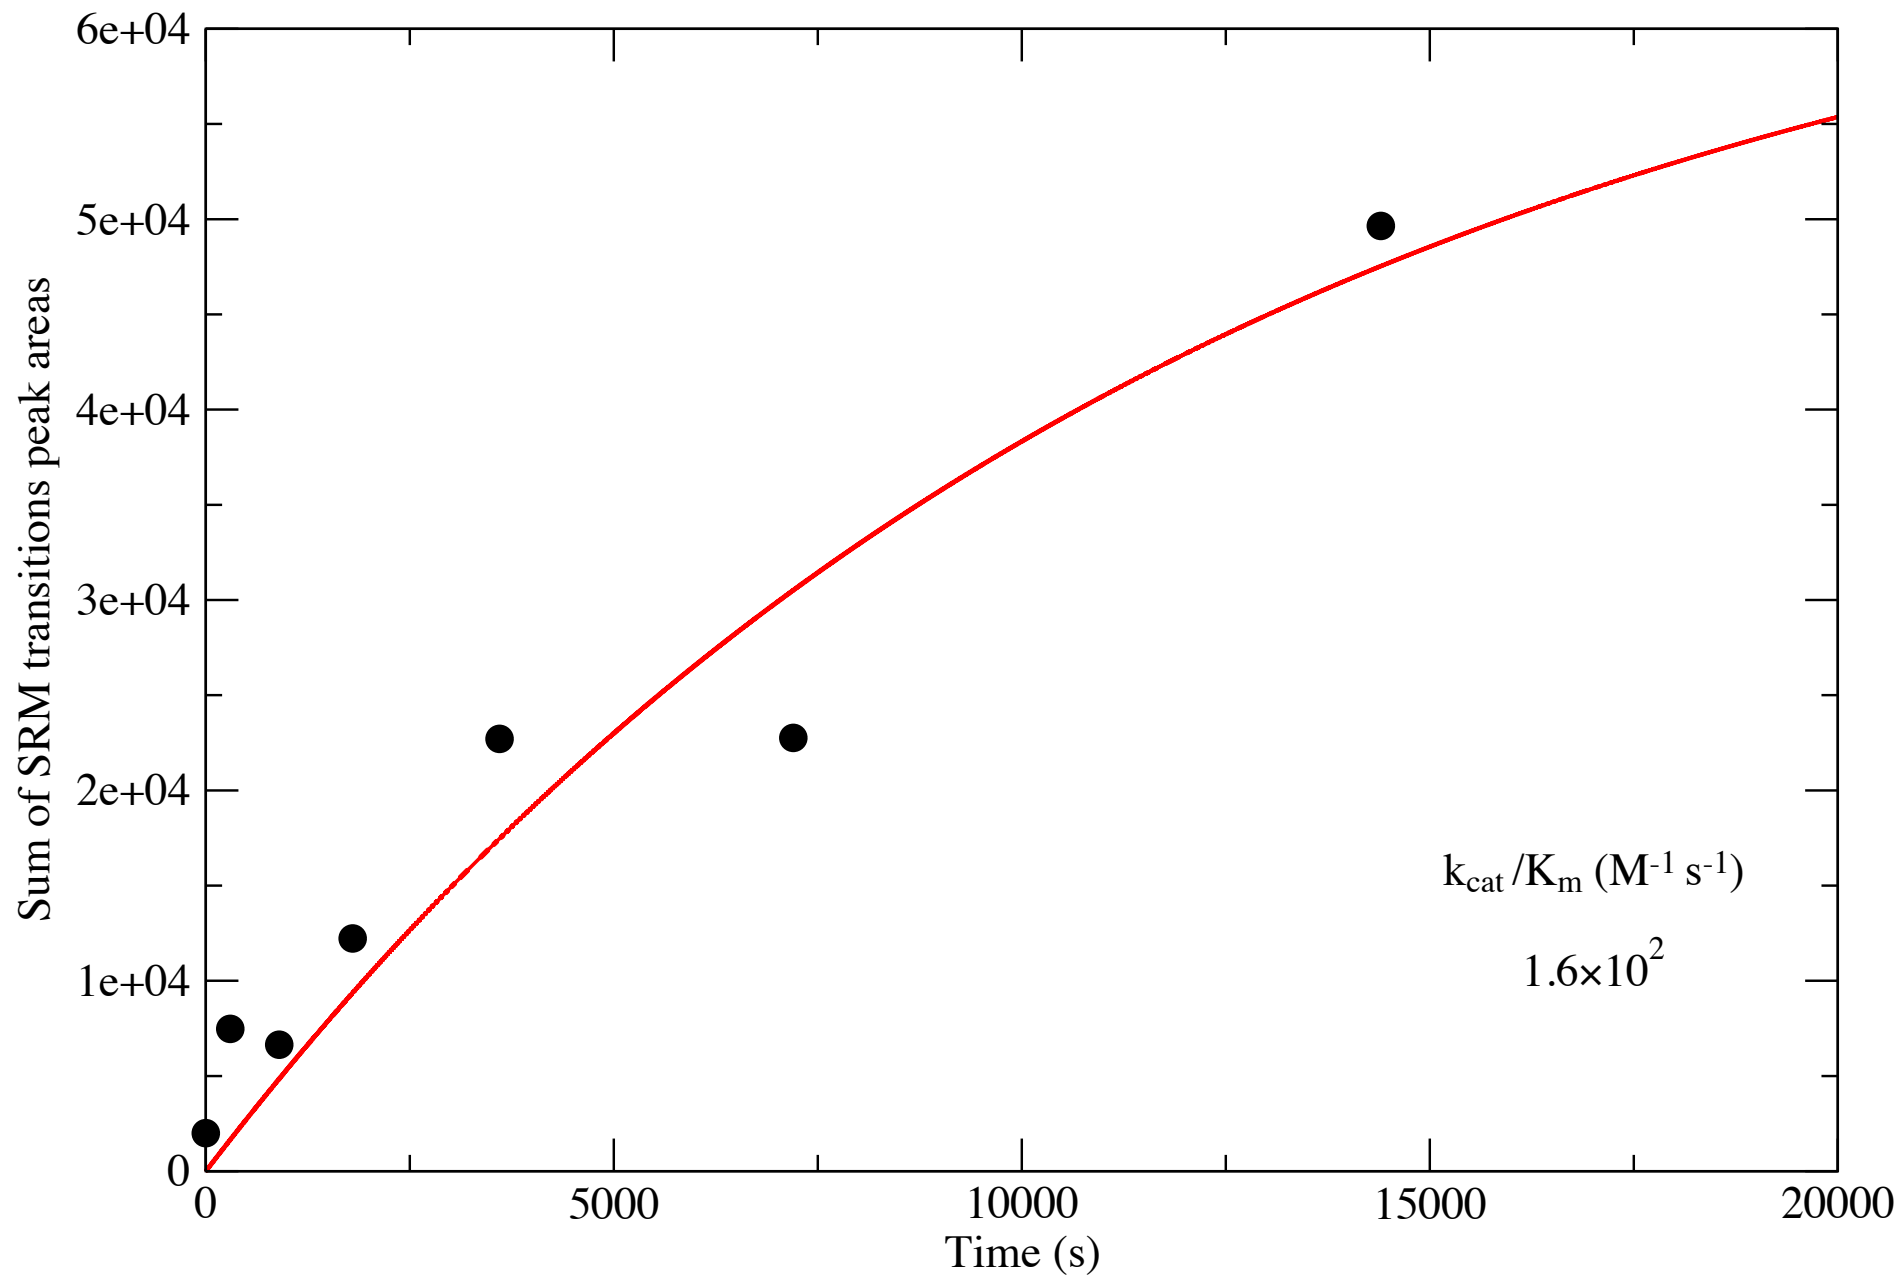

# DVL3\_HUMAN (SLVSAQR)

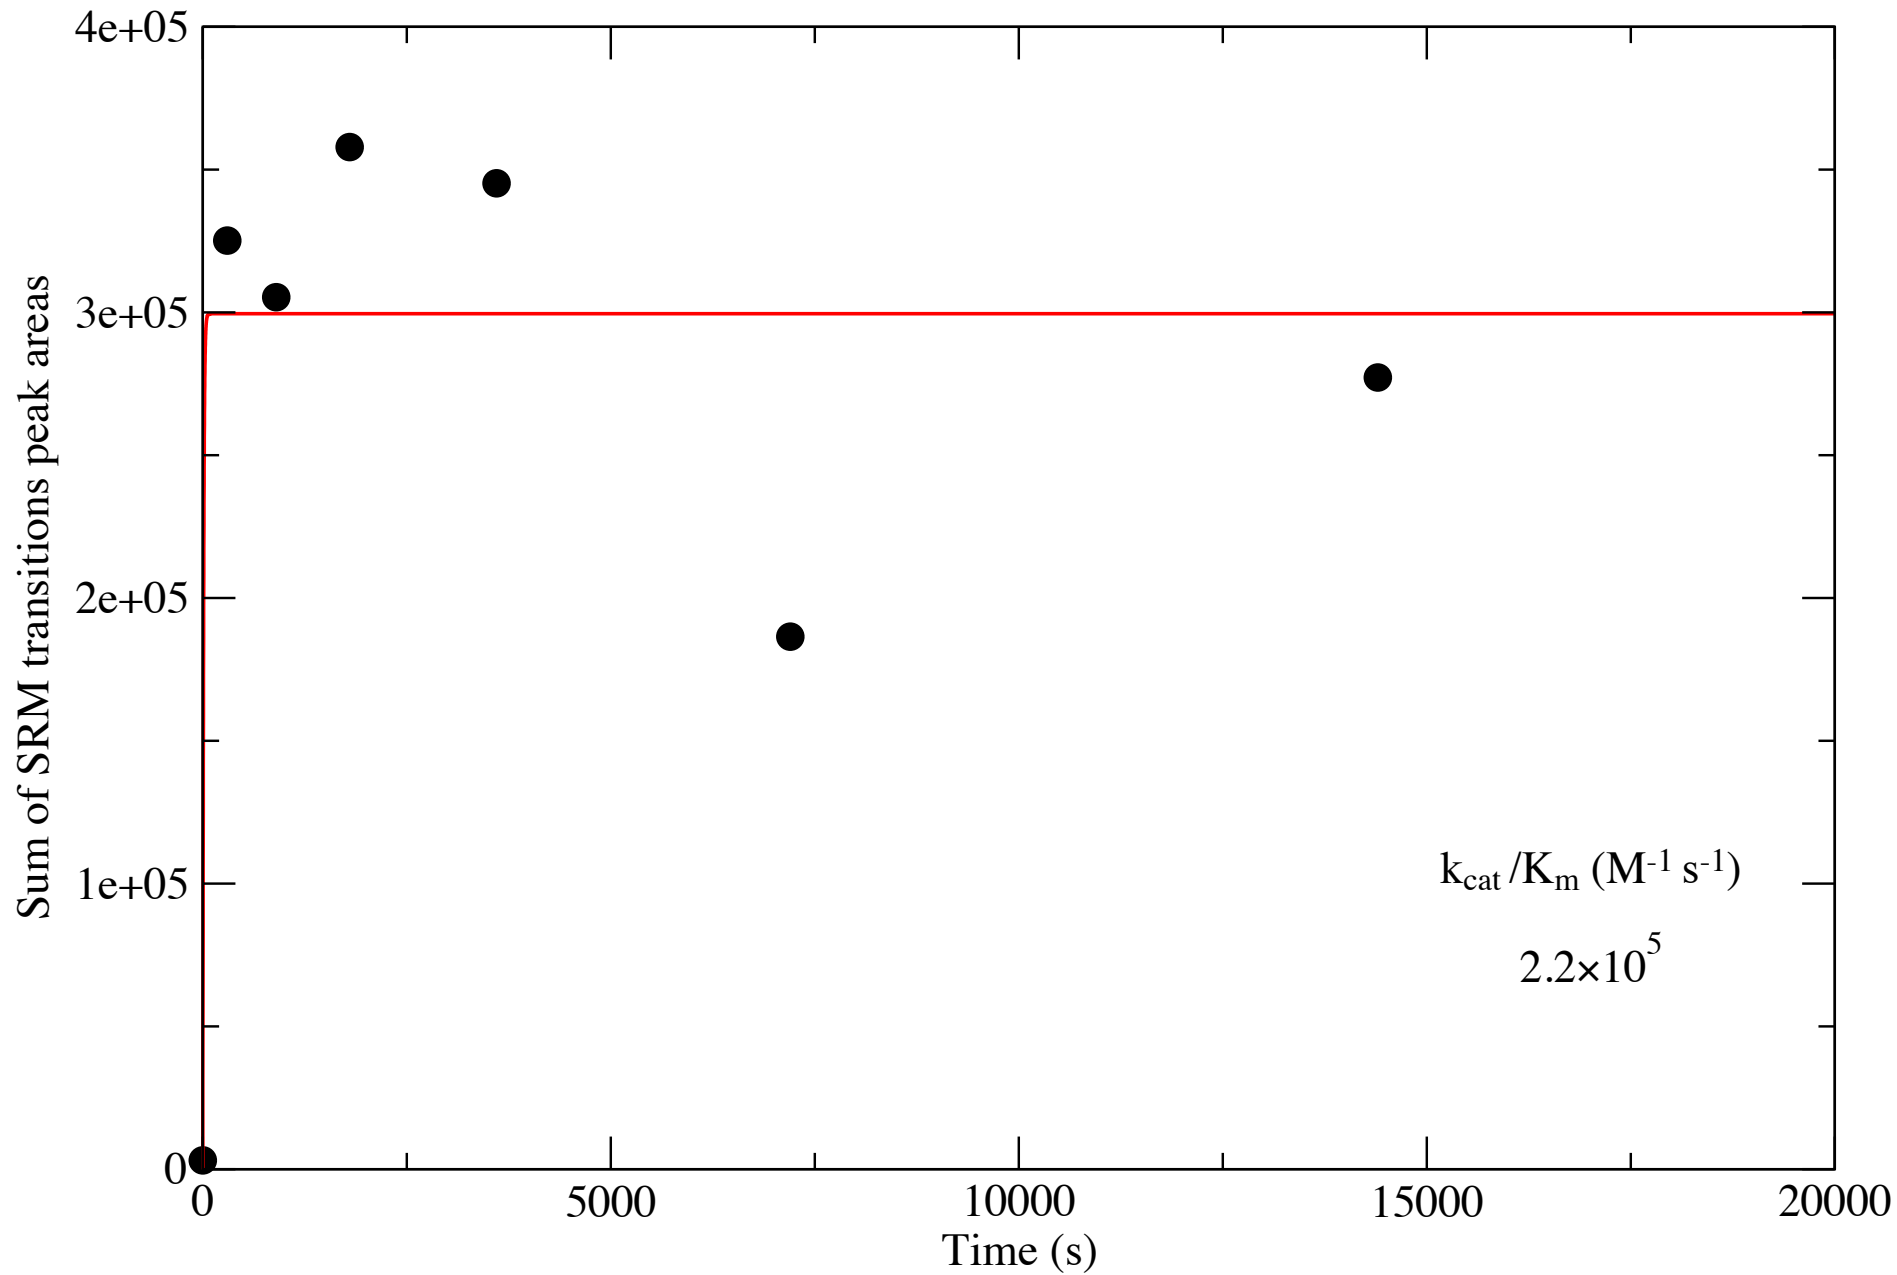

# EF2\_HUMAN (HACIPIKK)

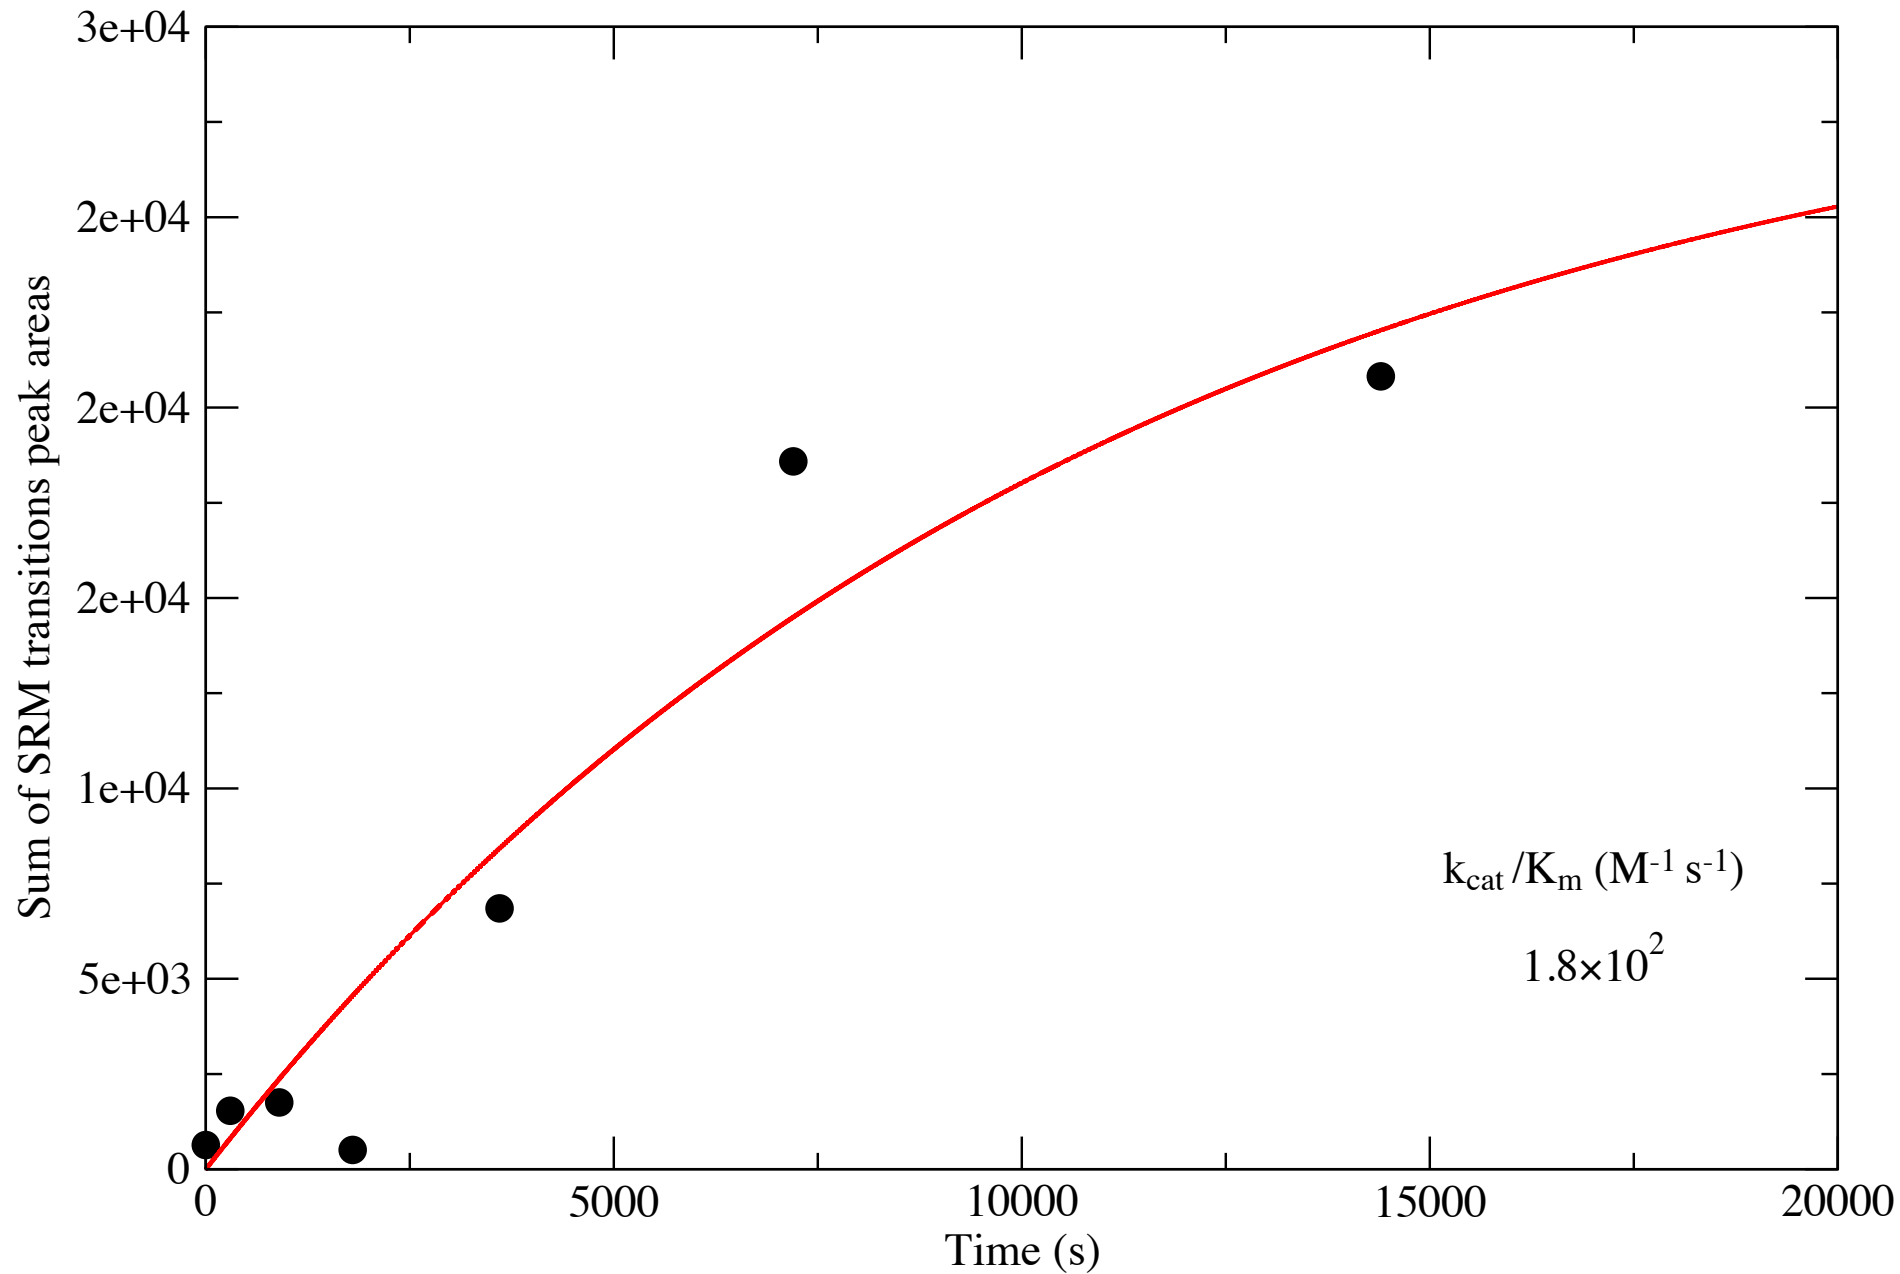

# EHMT1\_HUMAN (GLQEVPLCSCR)

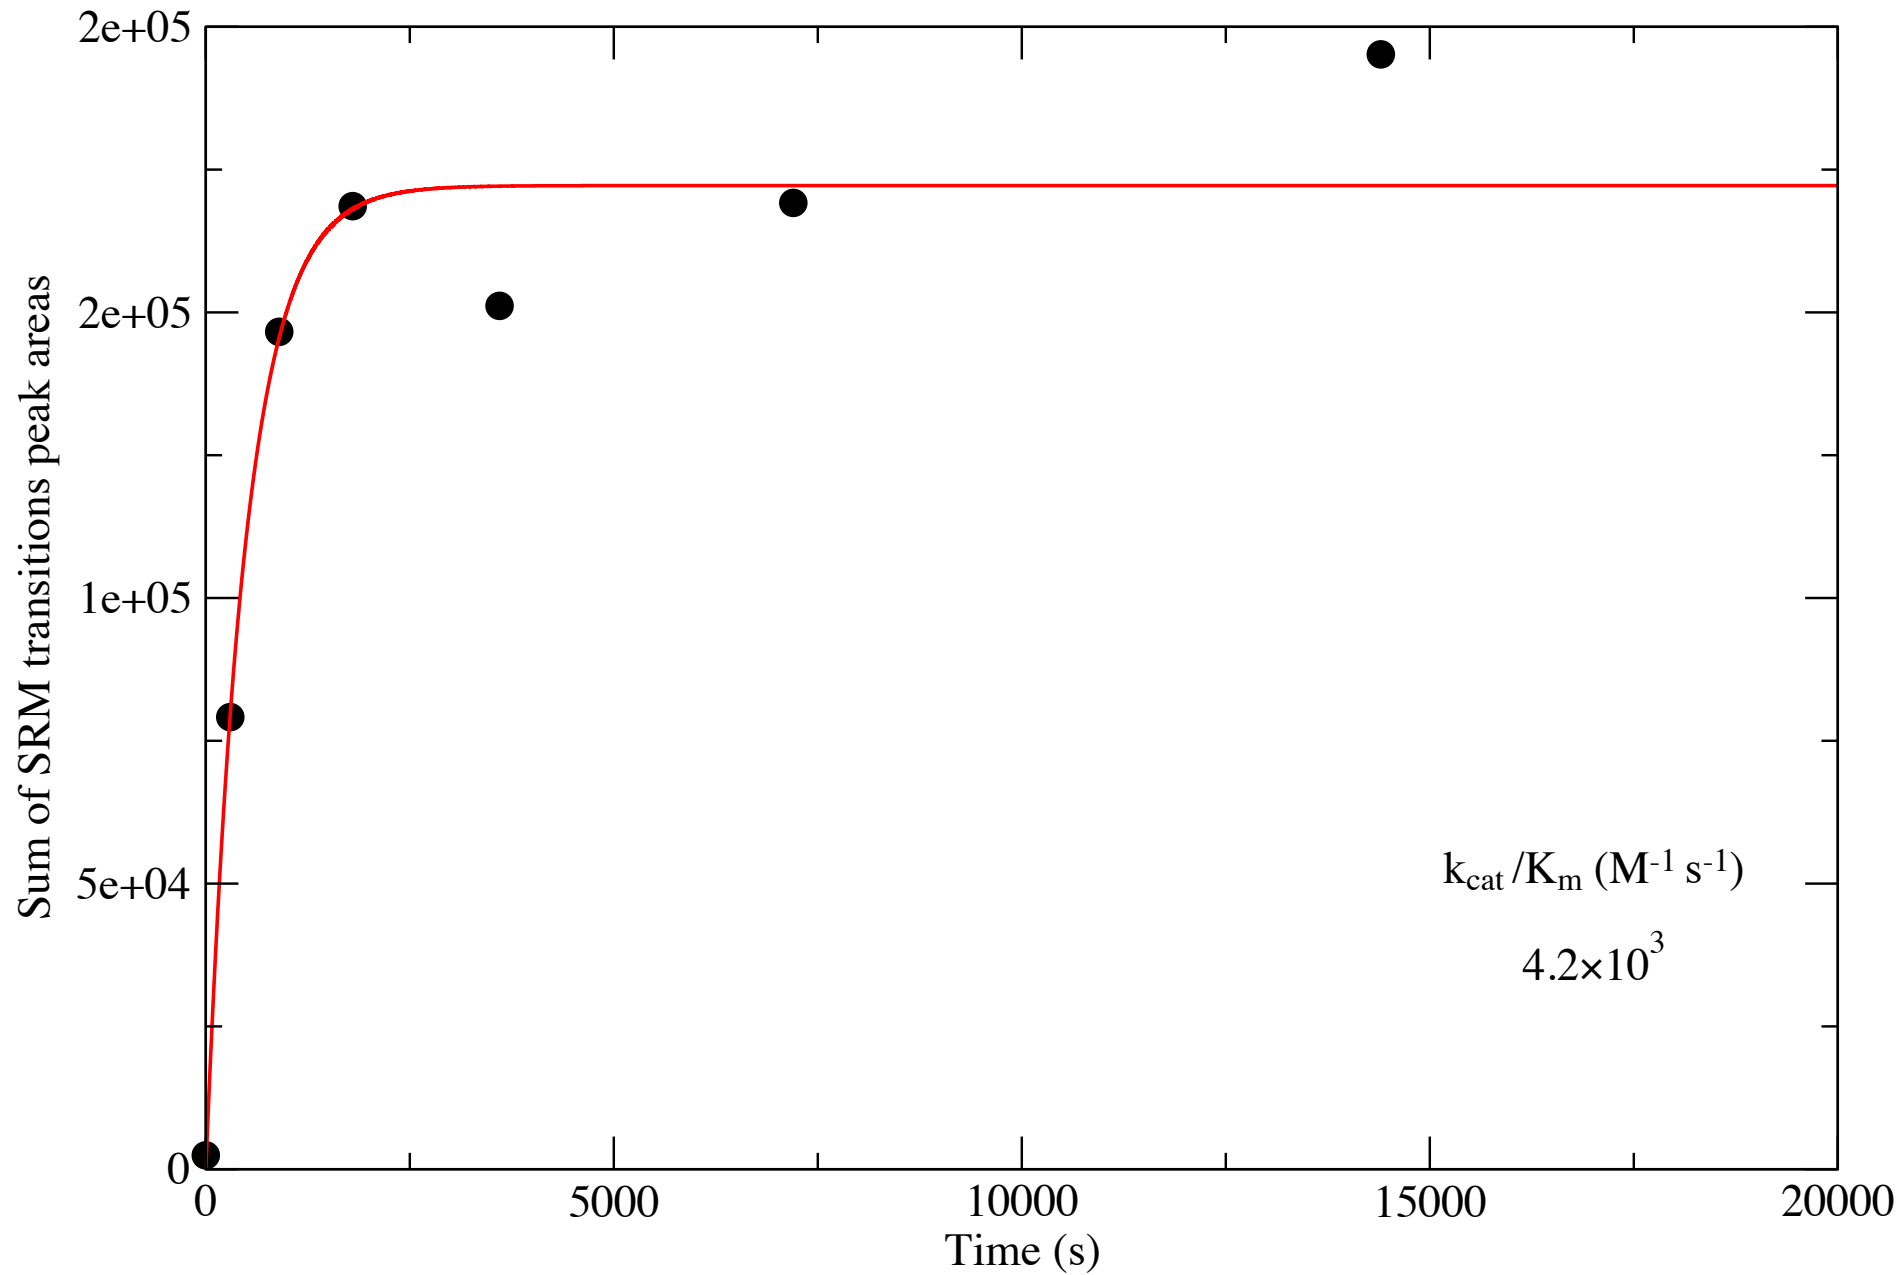

# EI2BD\_HUMAN (AFVSNELDDPDDLQCK)

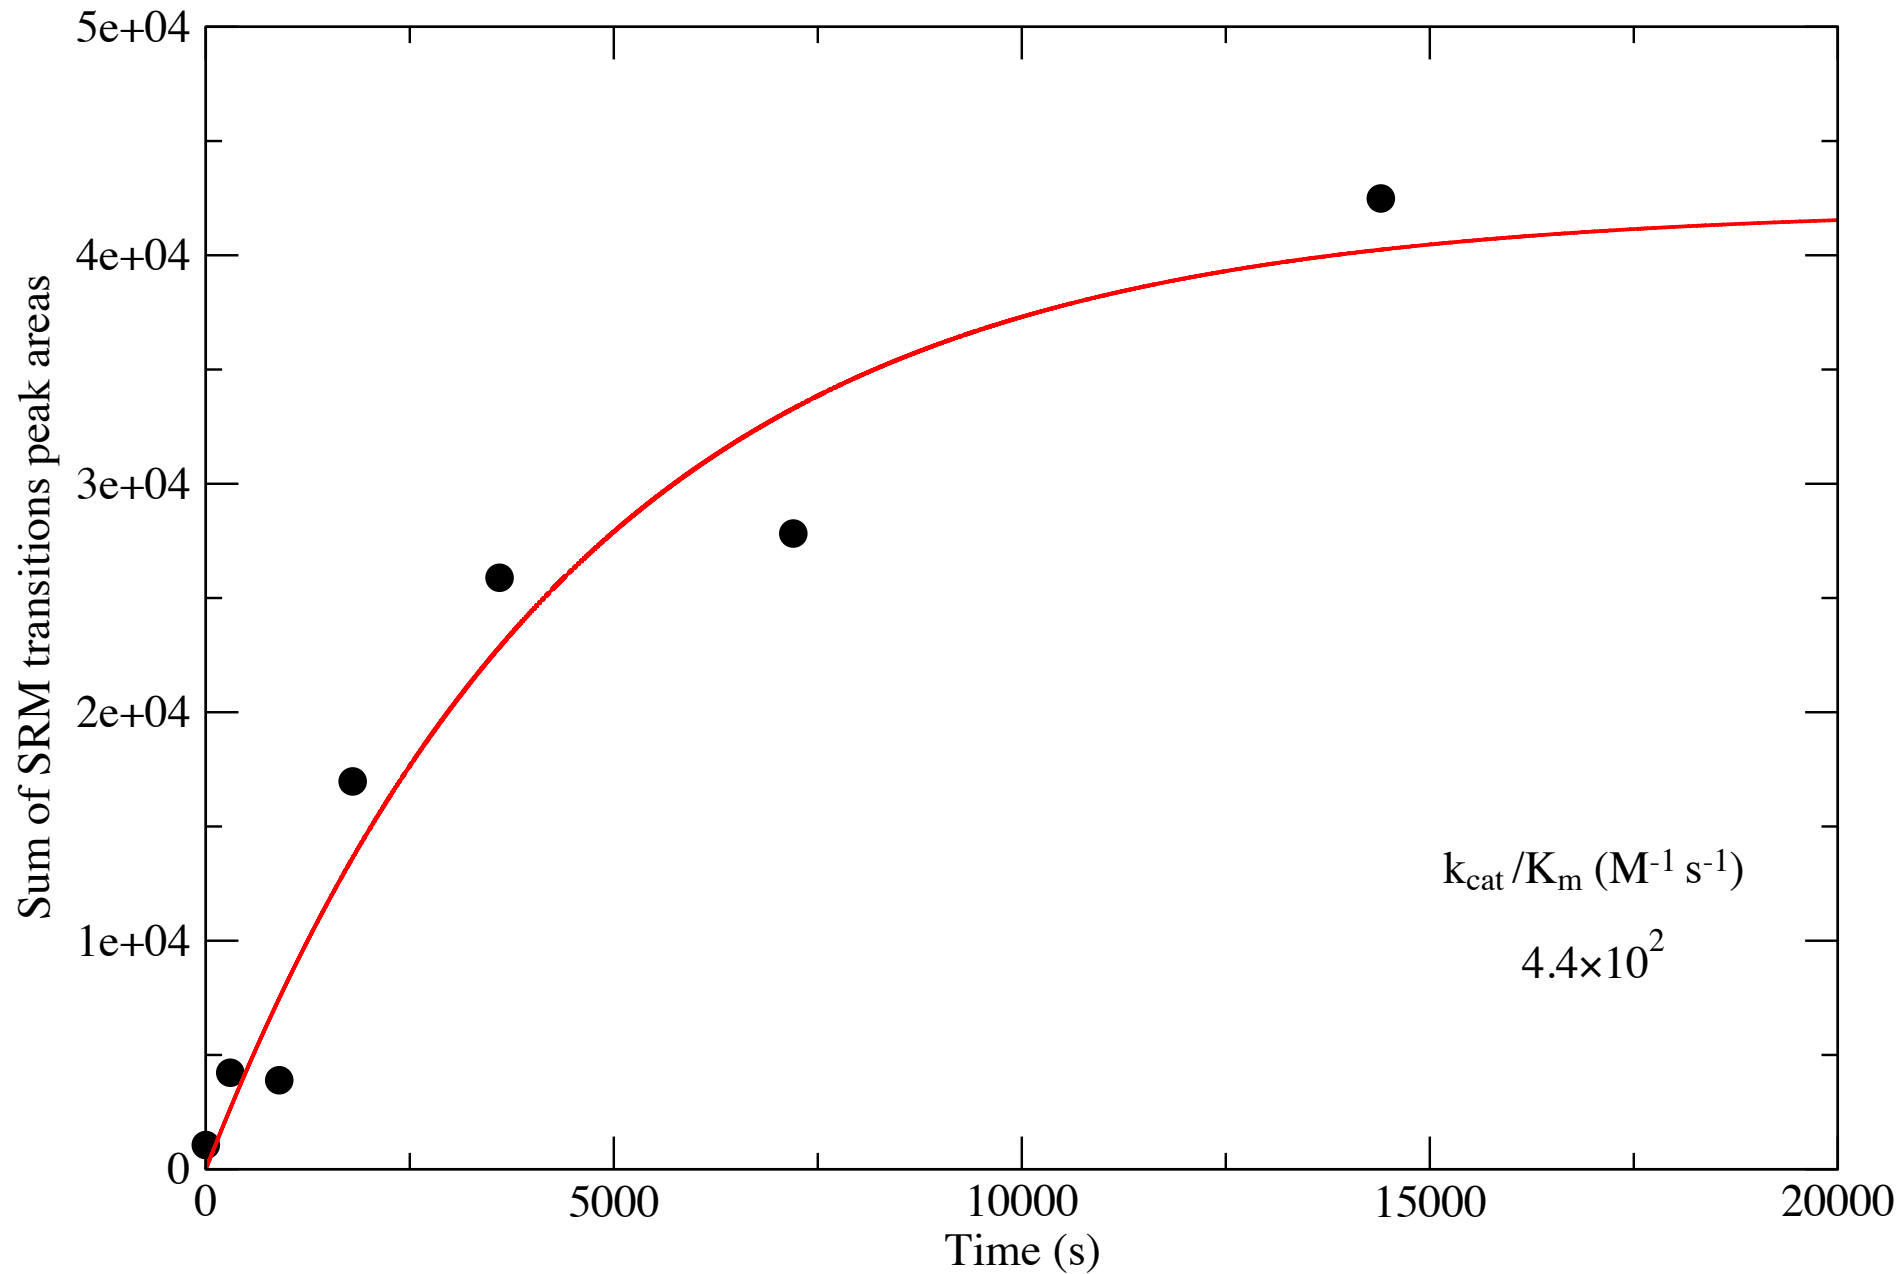

# EIF2D\_HUMAN (STLQGDMR)

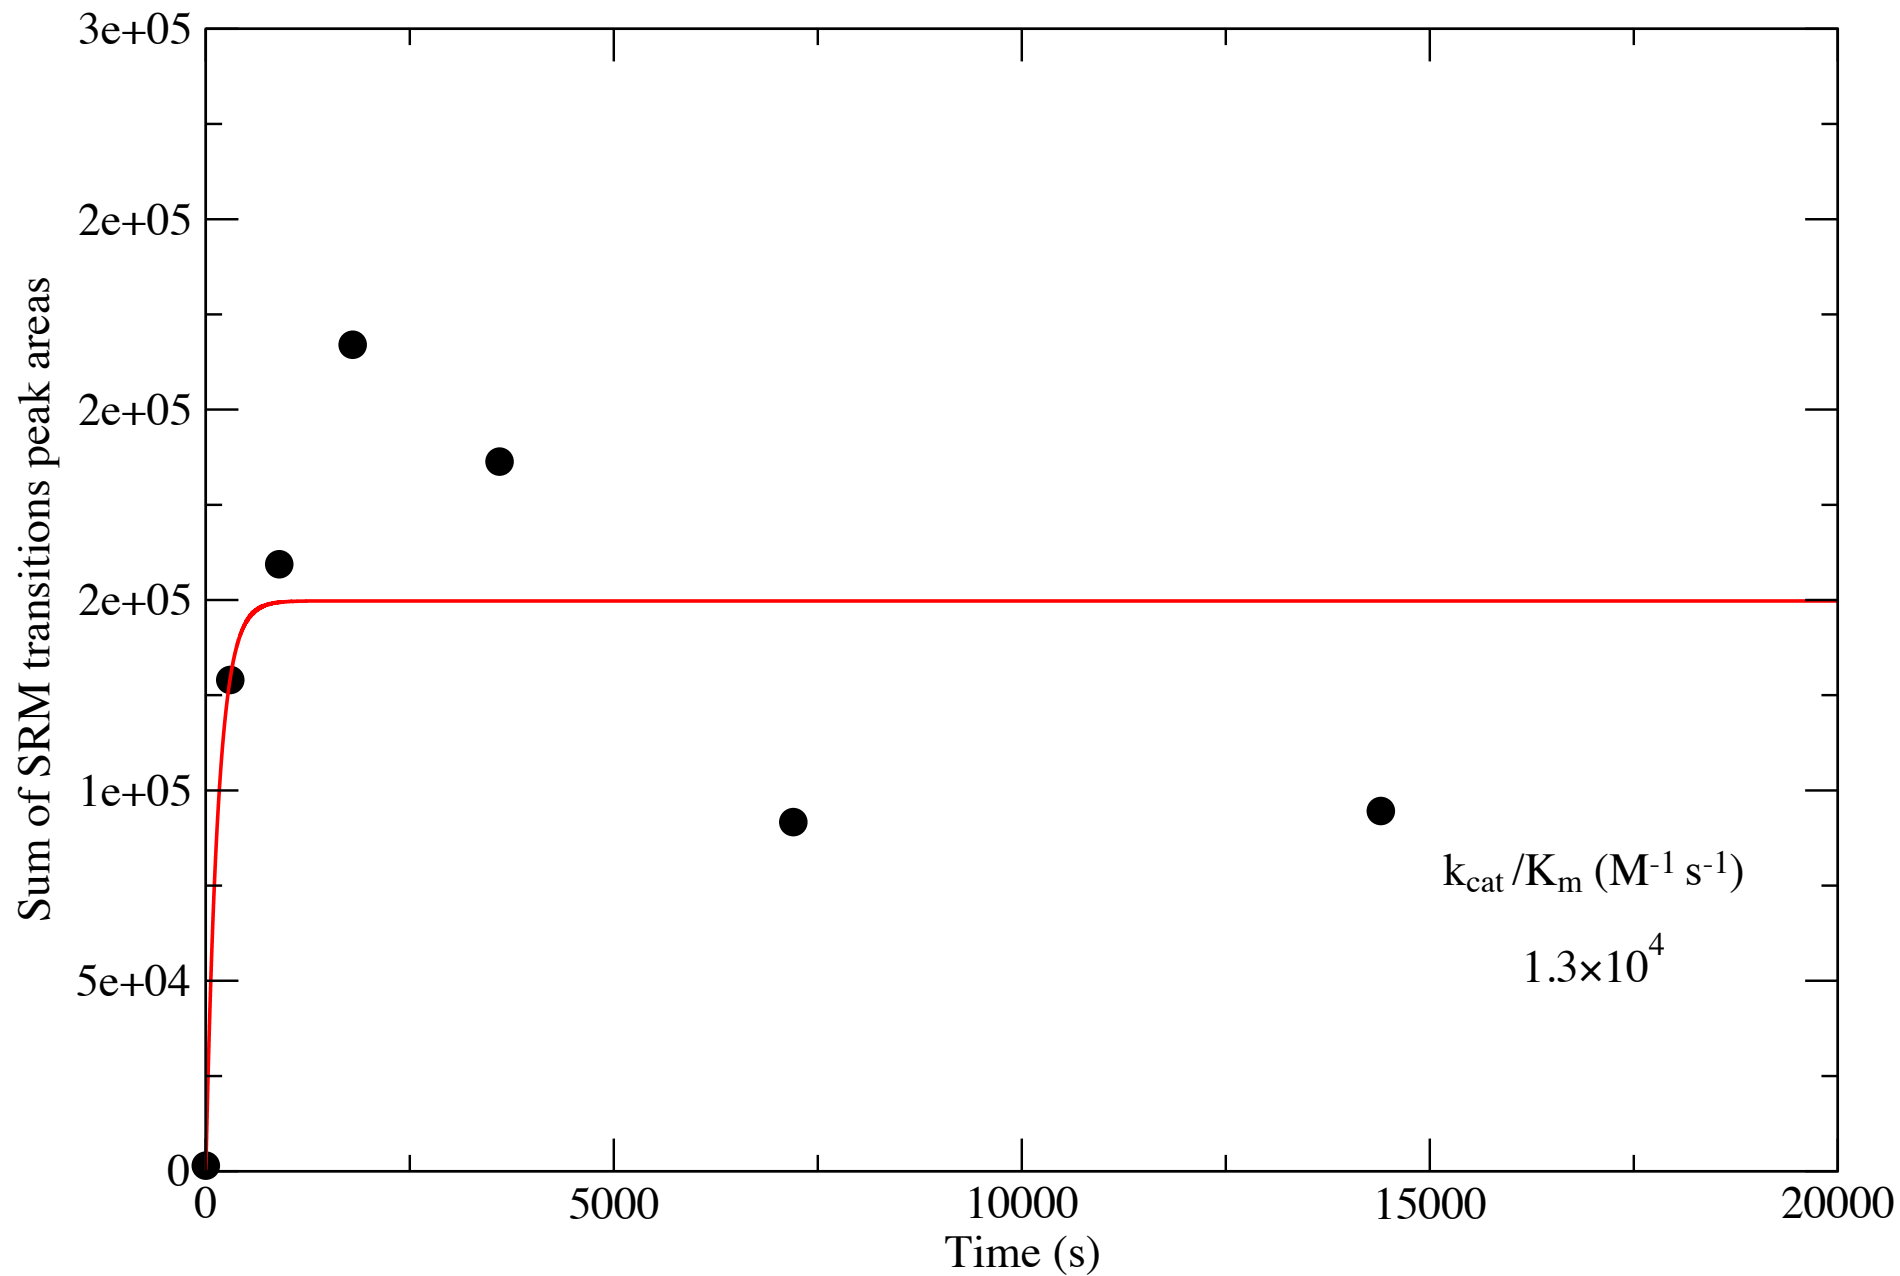

# EIF3C\_HUMAN (GVSAATFLK)

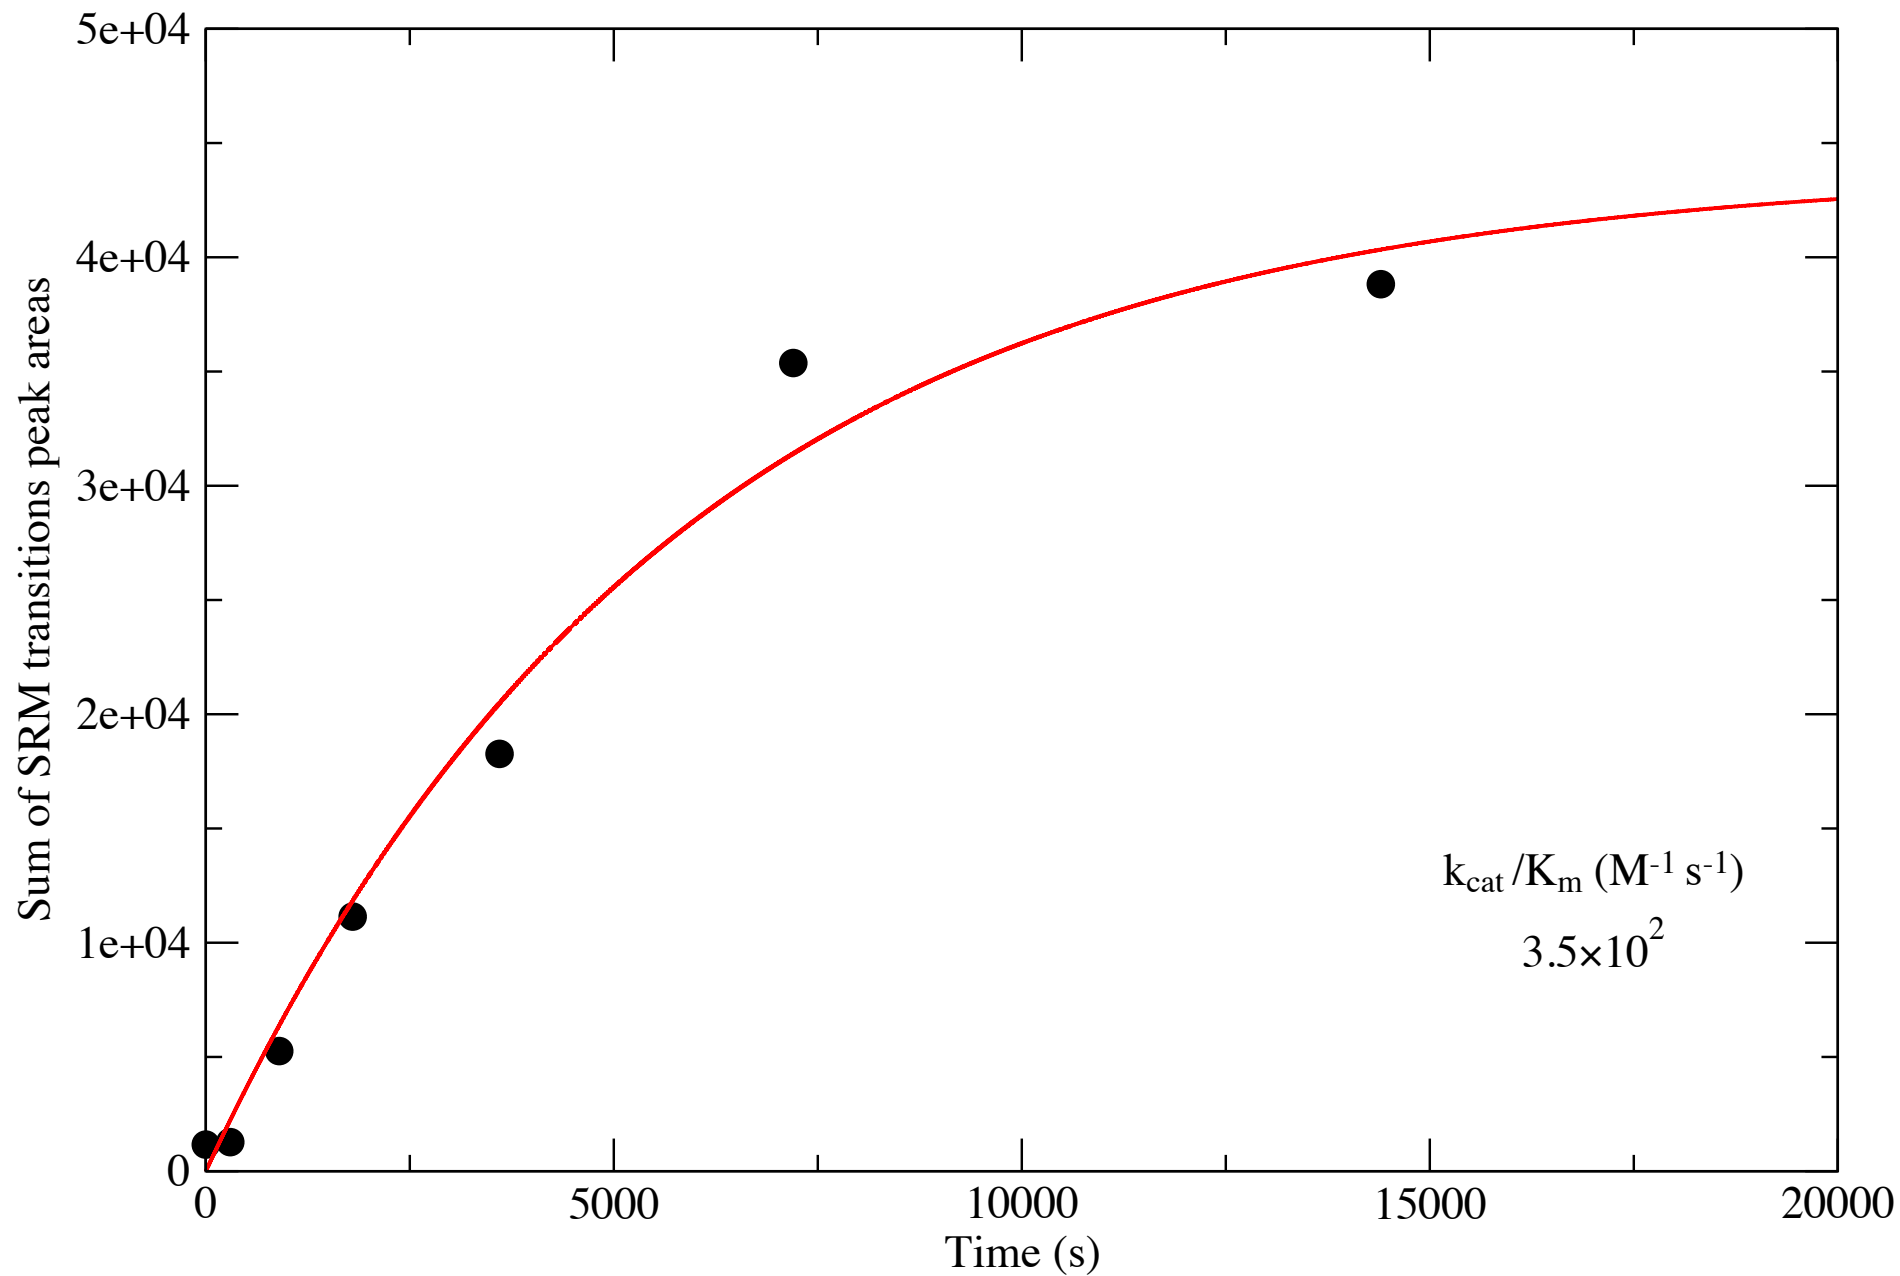

# ELF1\_HUMAN (GIPEVMETQQVQEK)

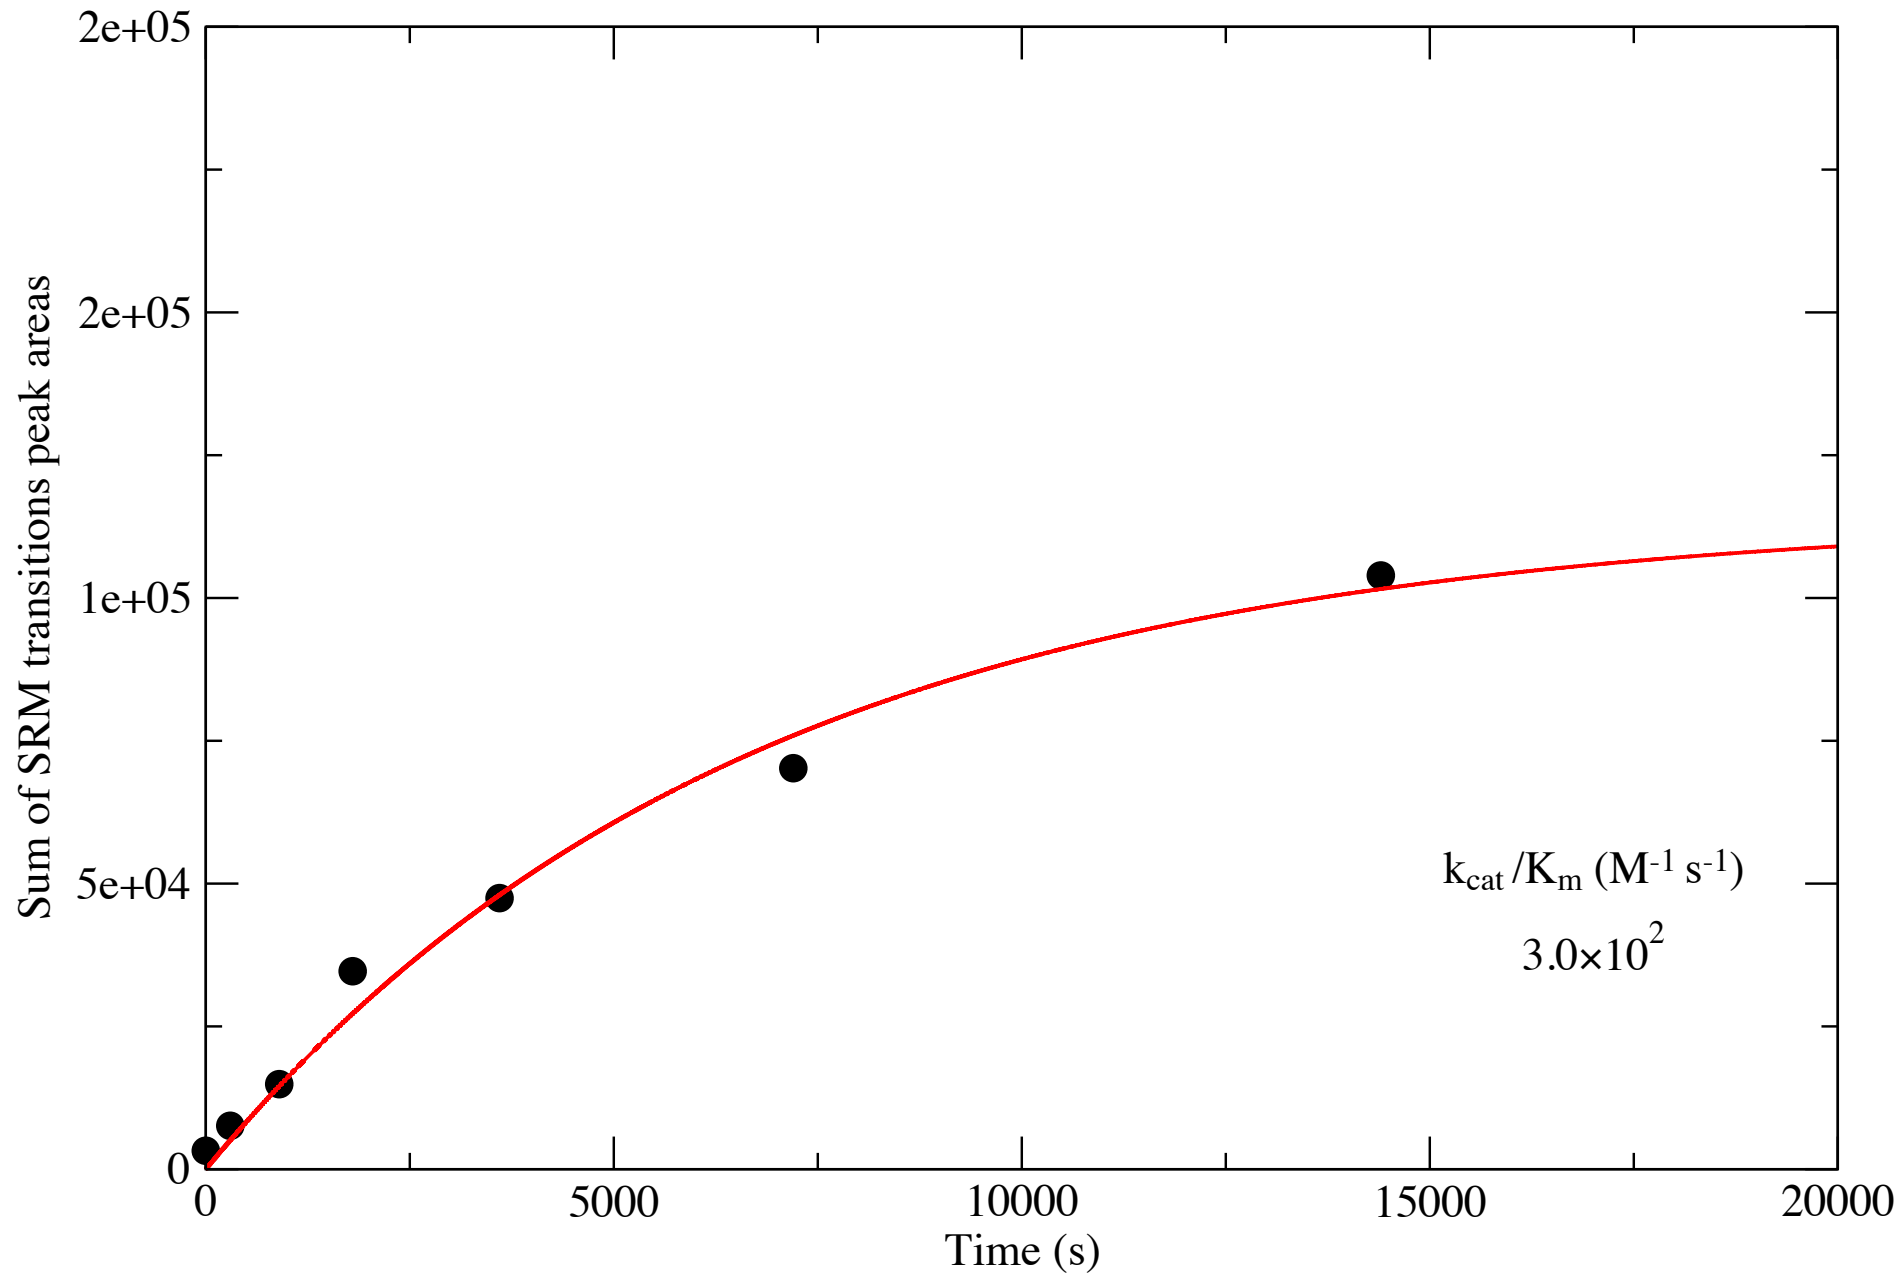



# ENPL\_HUMAN (GLNASQIR)

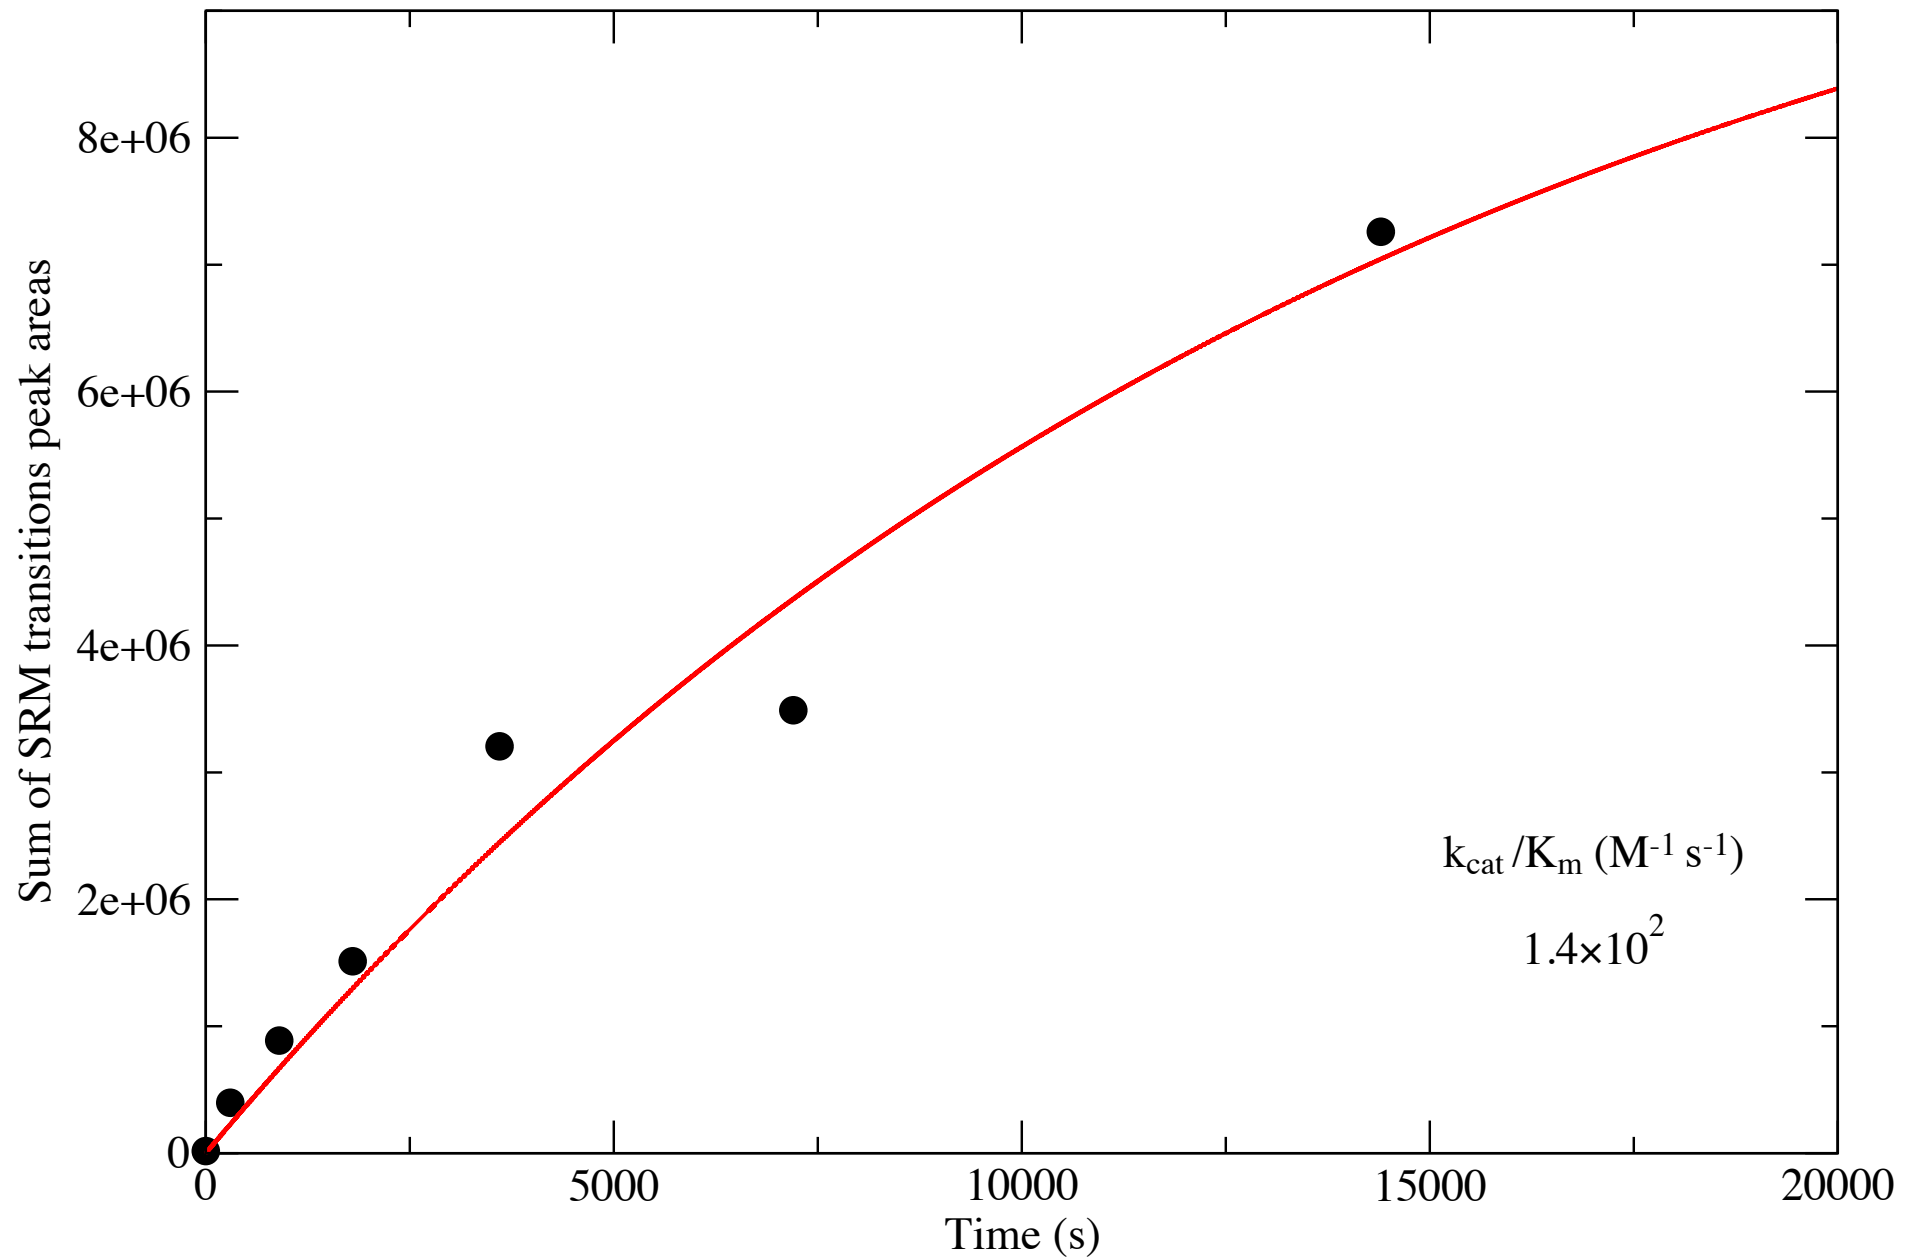

# ENPL\_HUMAN (GLNASQIRELR)

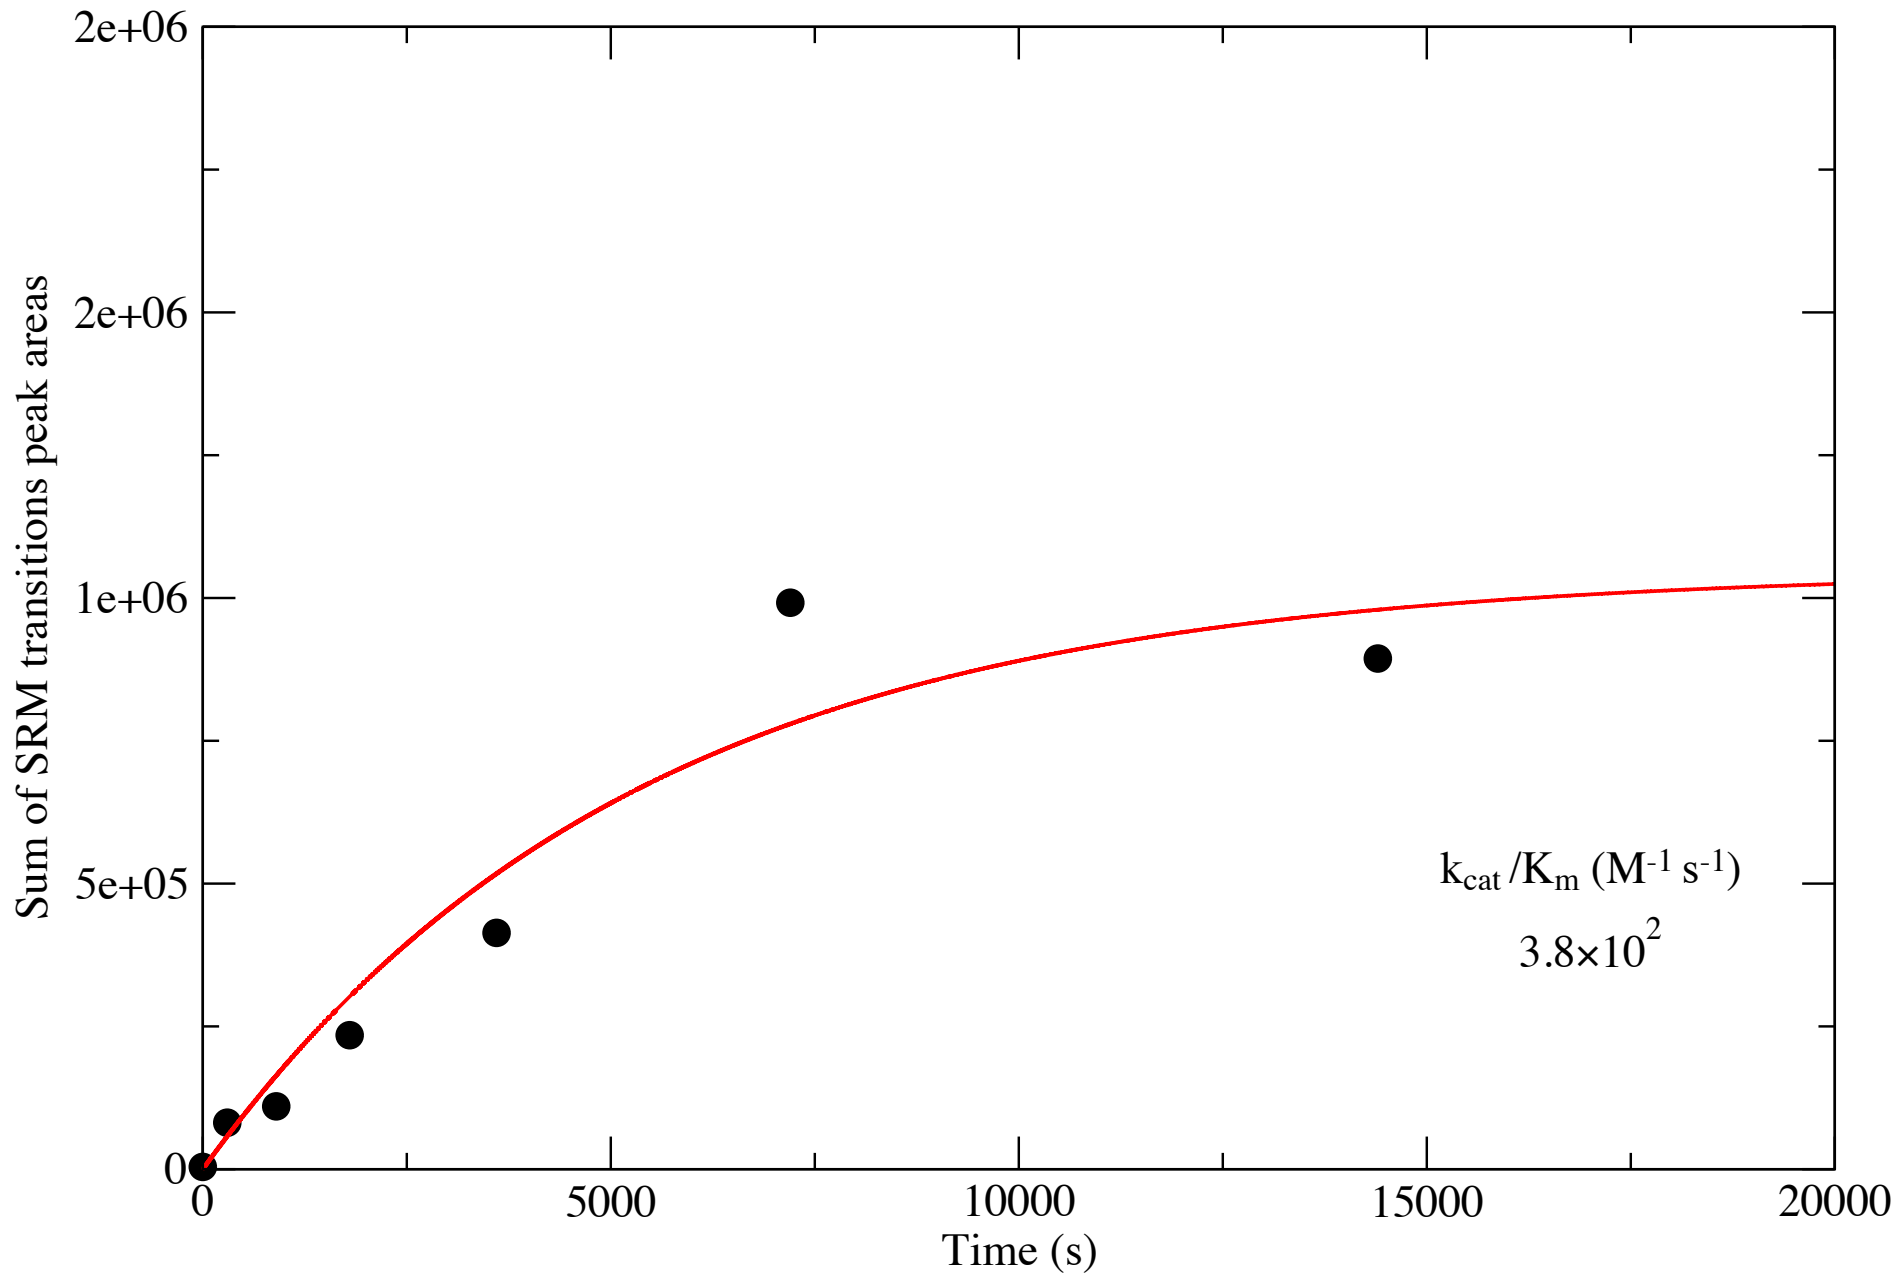

# ENPL\_HUMAN (GTVEEDLGK)

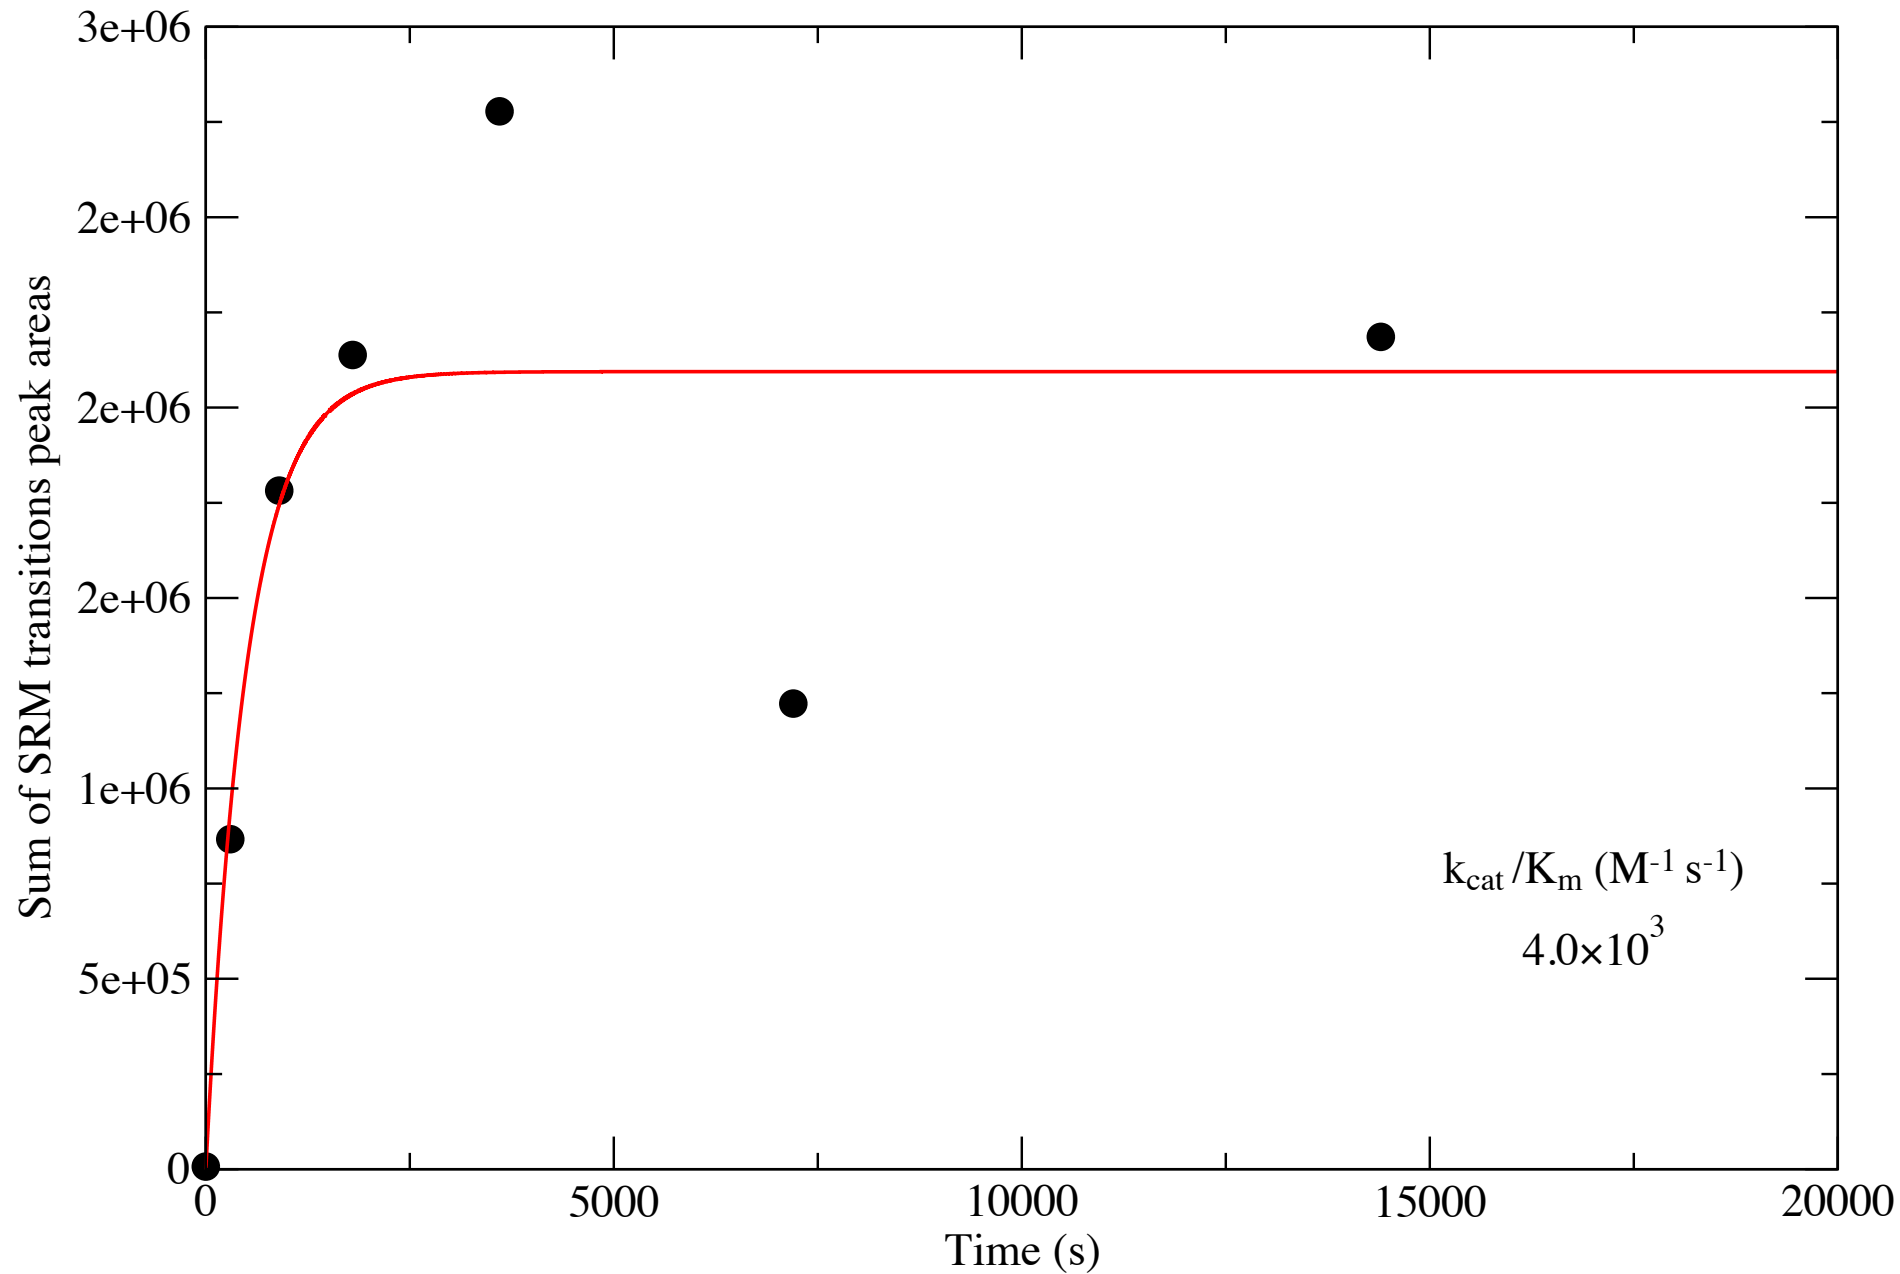

# ENPL\_HUMAN (GTVEEDLGKSR)

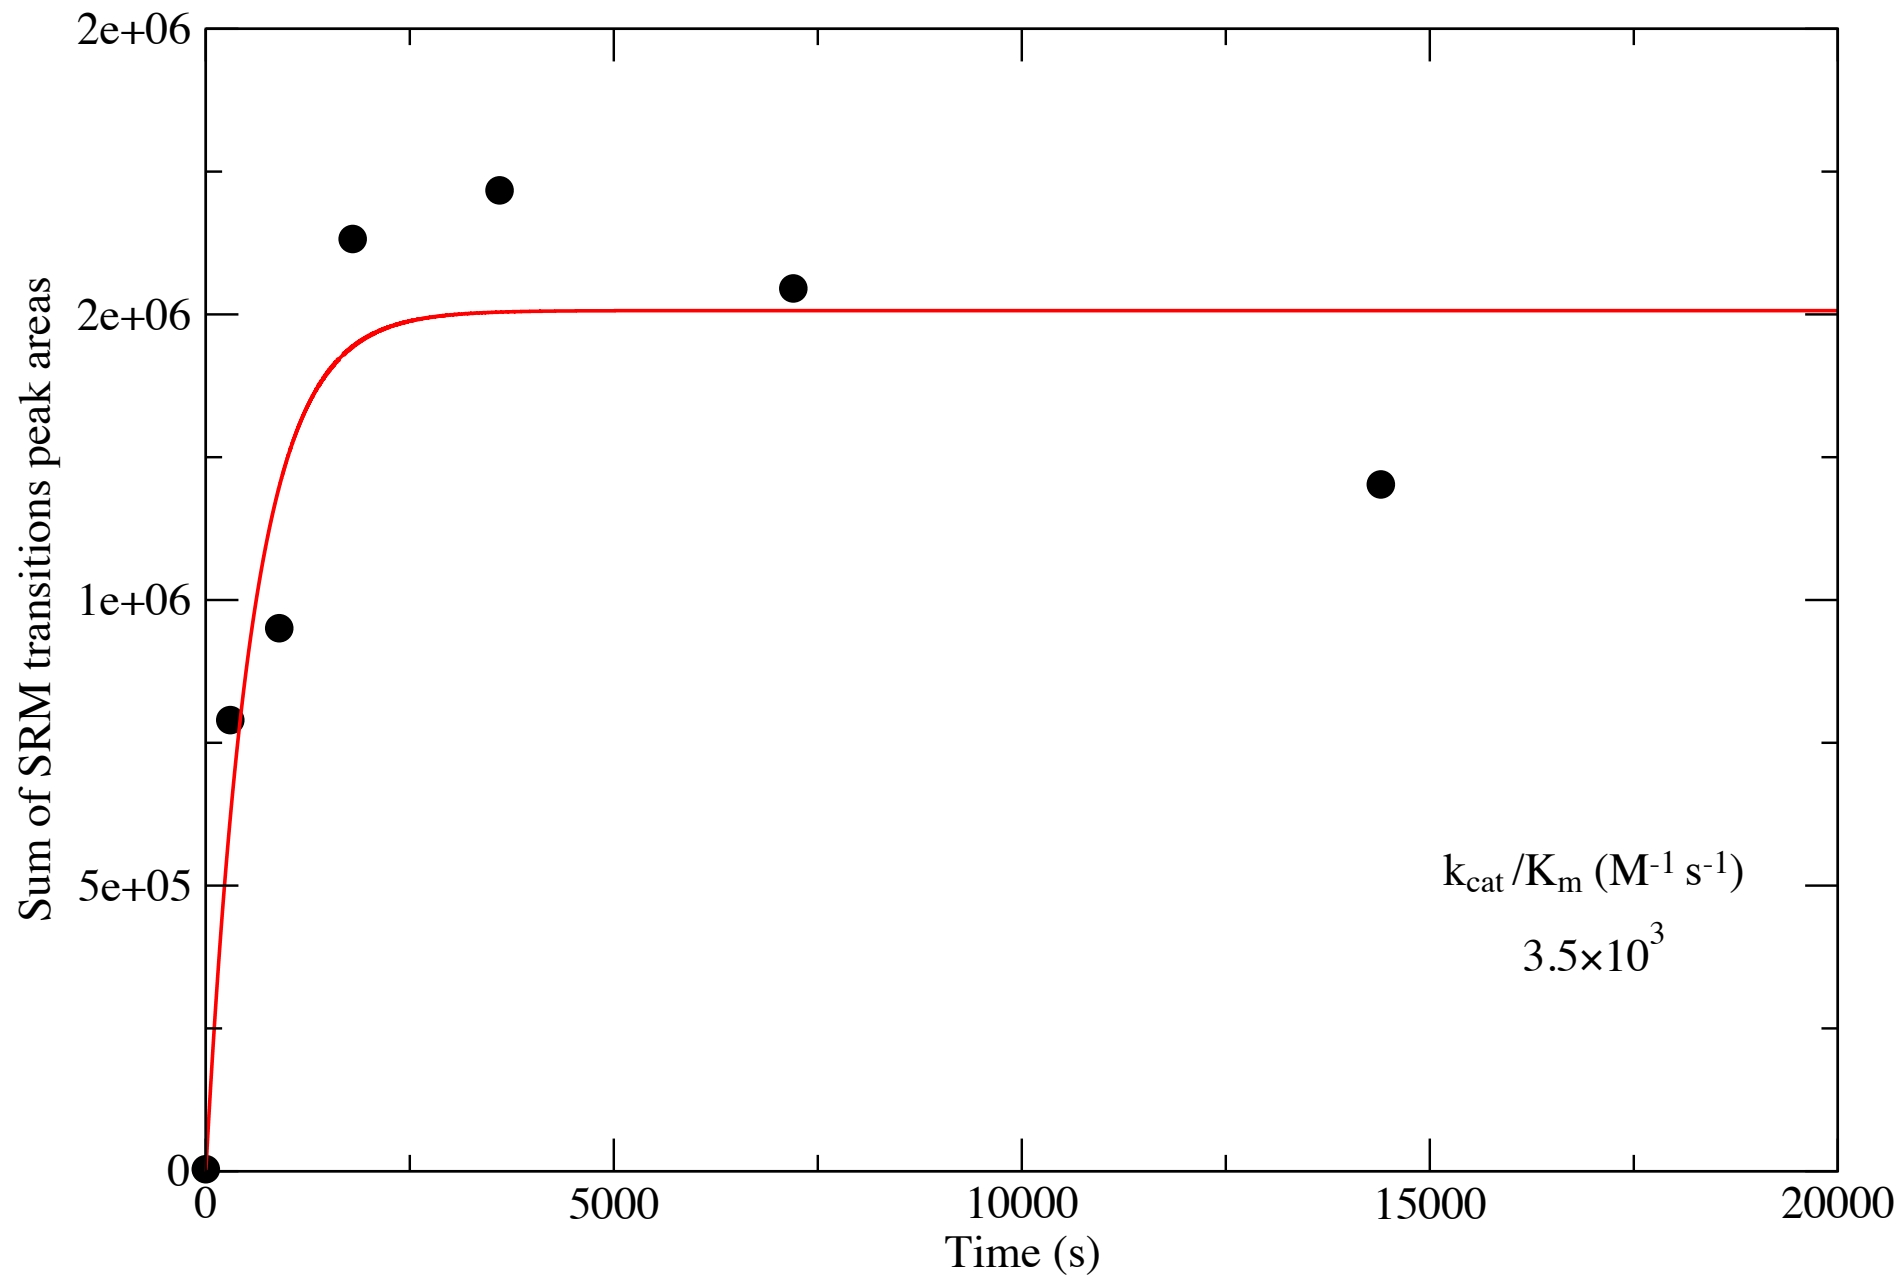

# EPN4\_HUMAN (SVGGFRYSER)

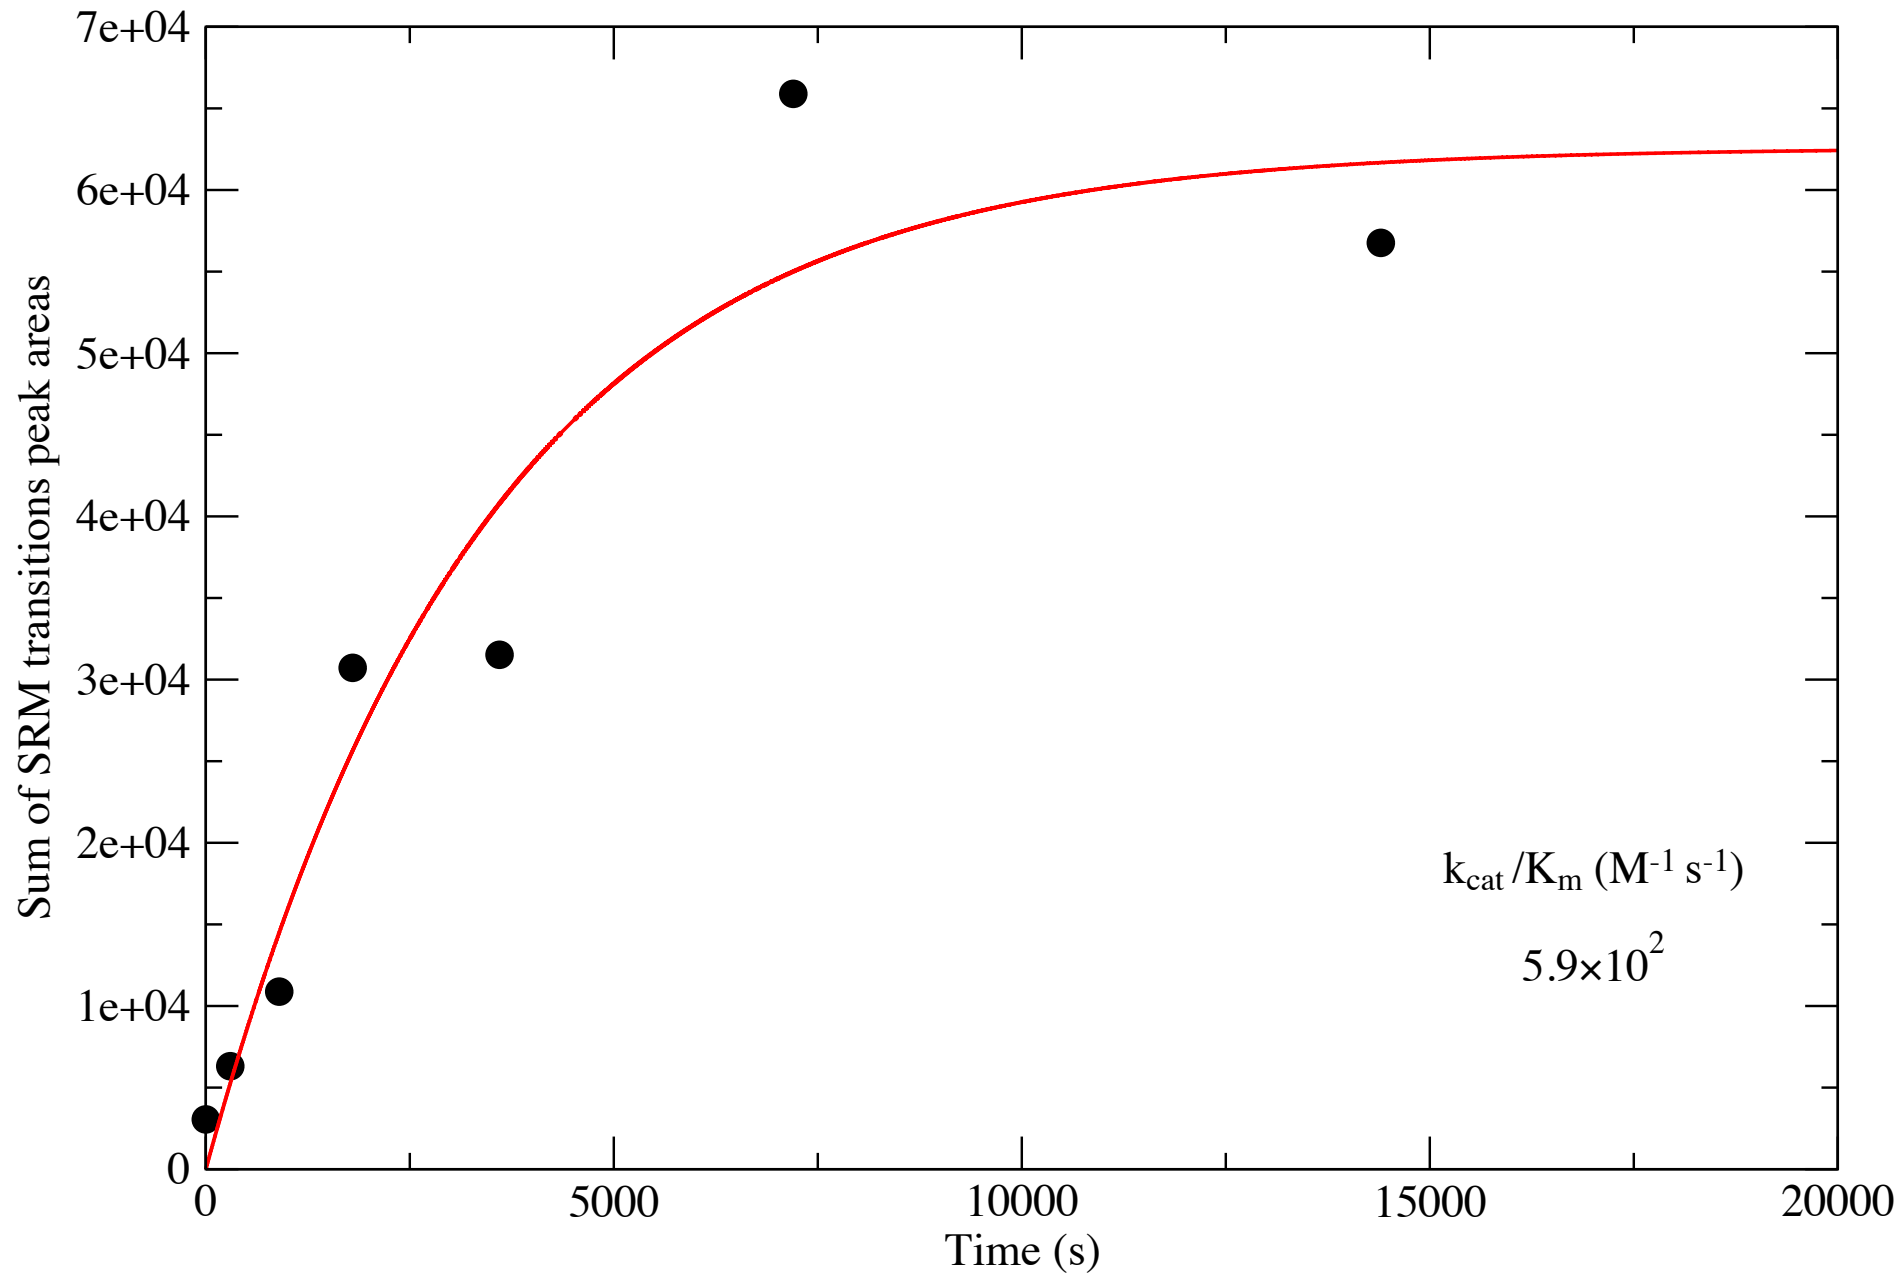

# EPN4\_HUMAN (SVGGFRYSERYDPEPK)

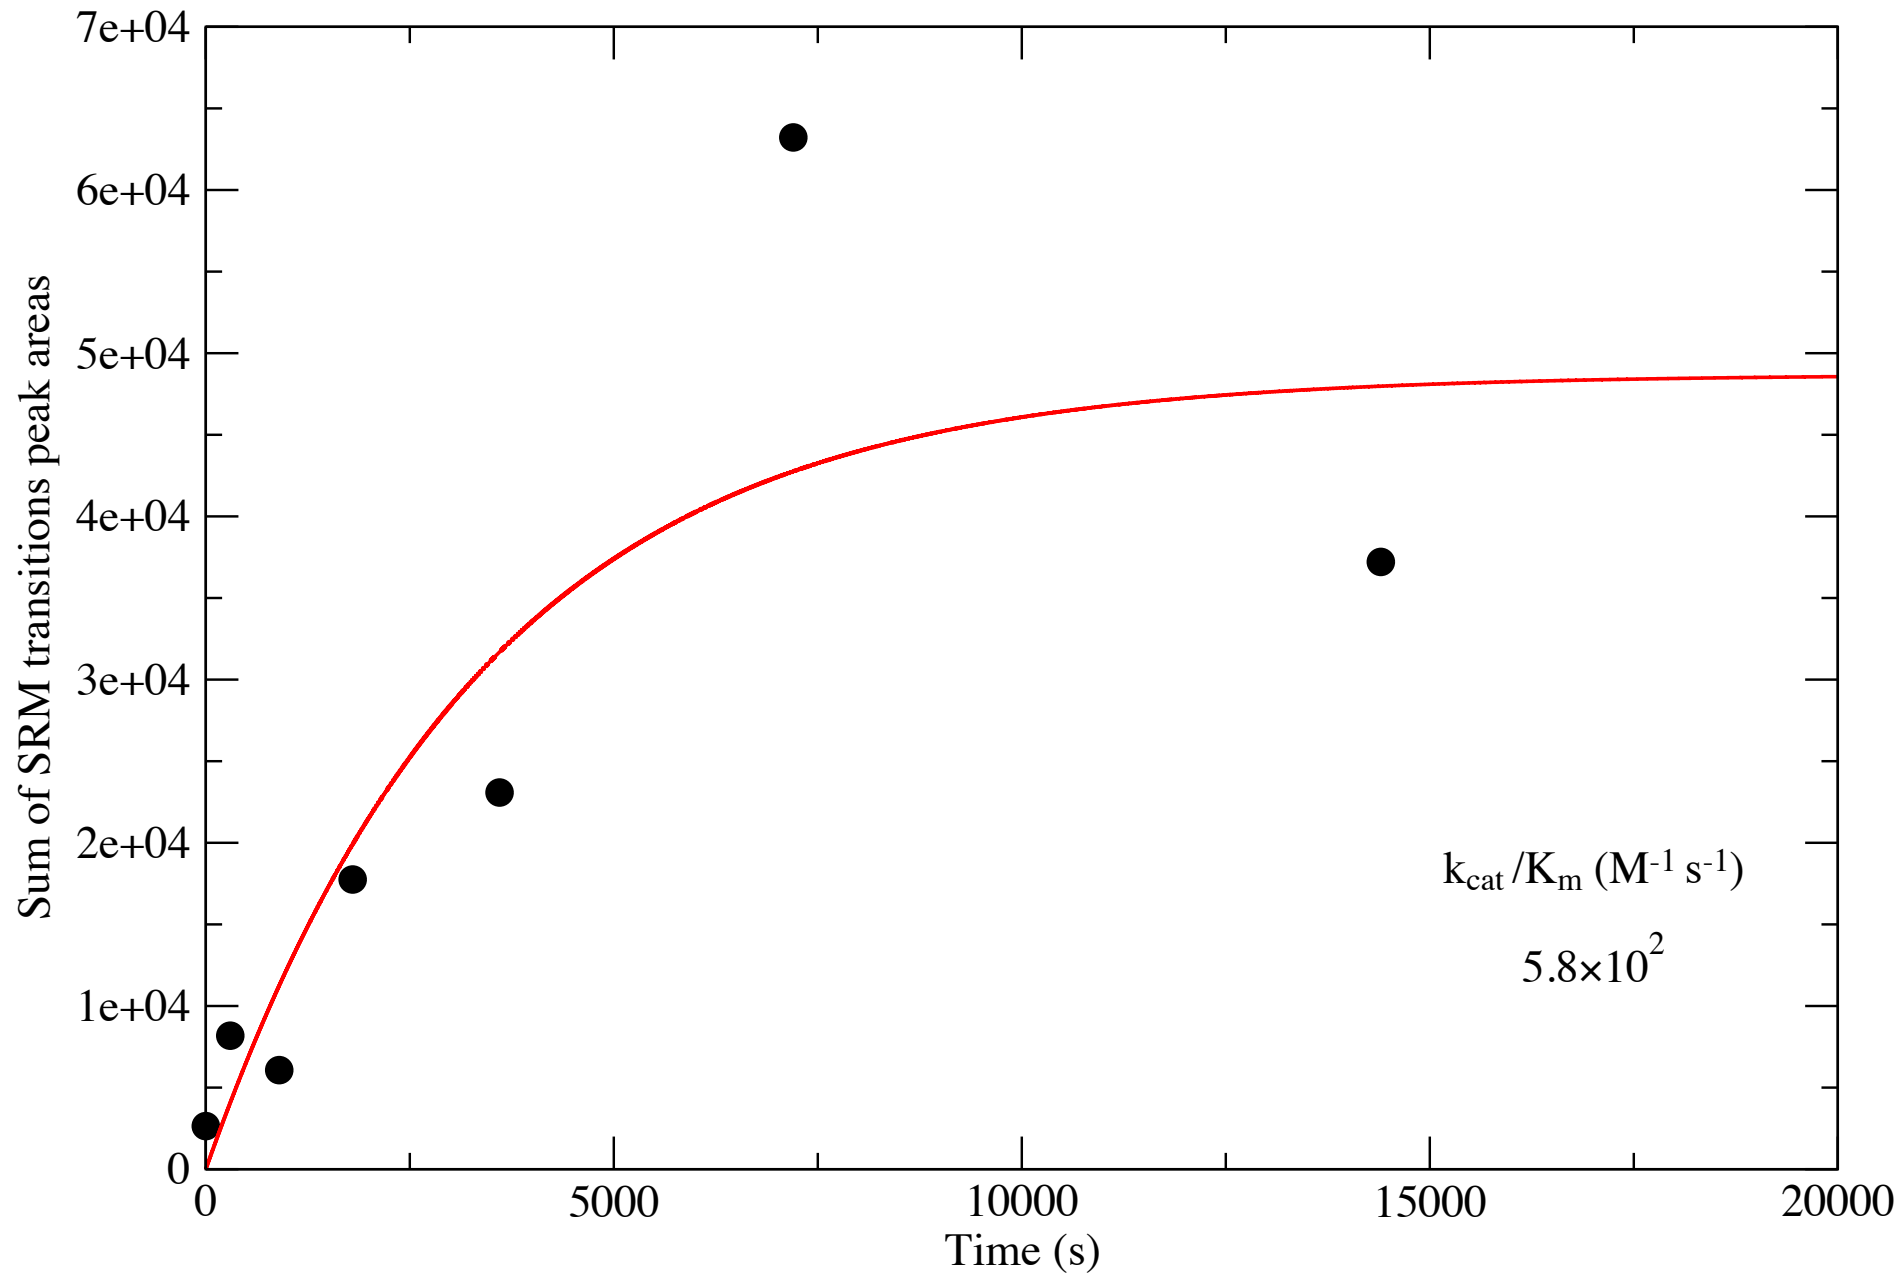

# EPS15\_HUMAN (FFQSDPFVGSDFPKDDPFGK)

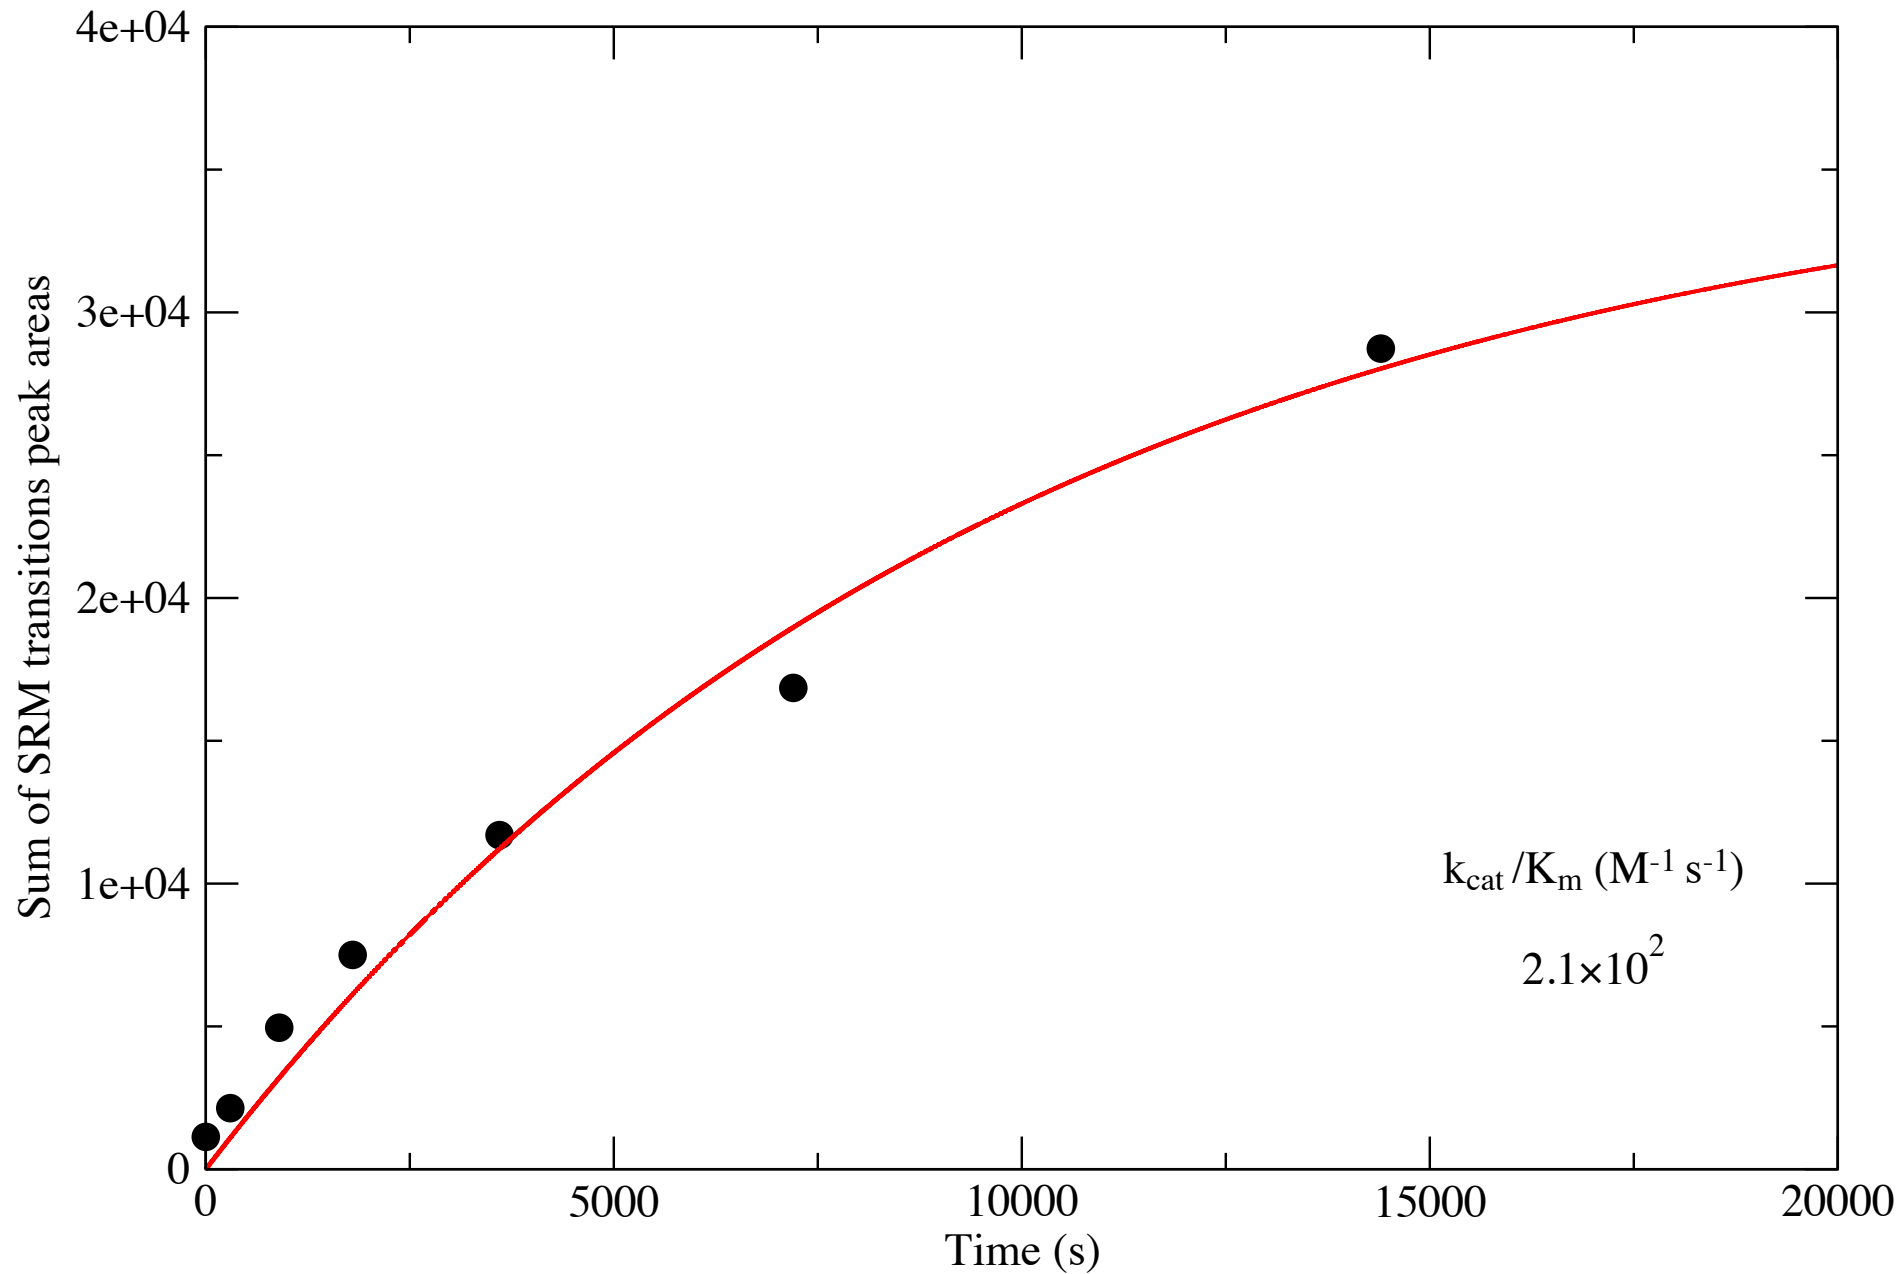

# ERF3B\_HUMAN (FVAPGENLK)

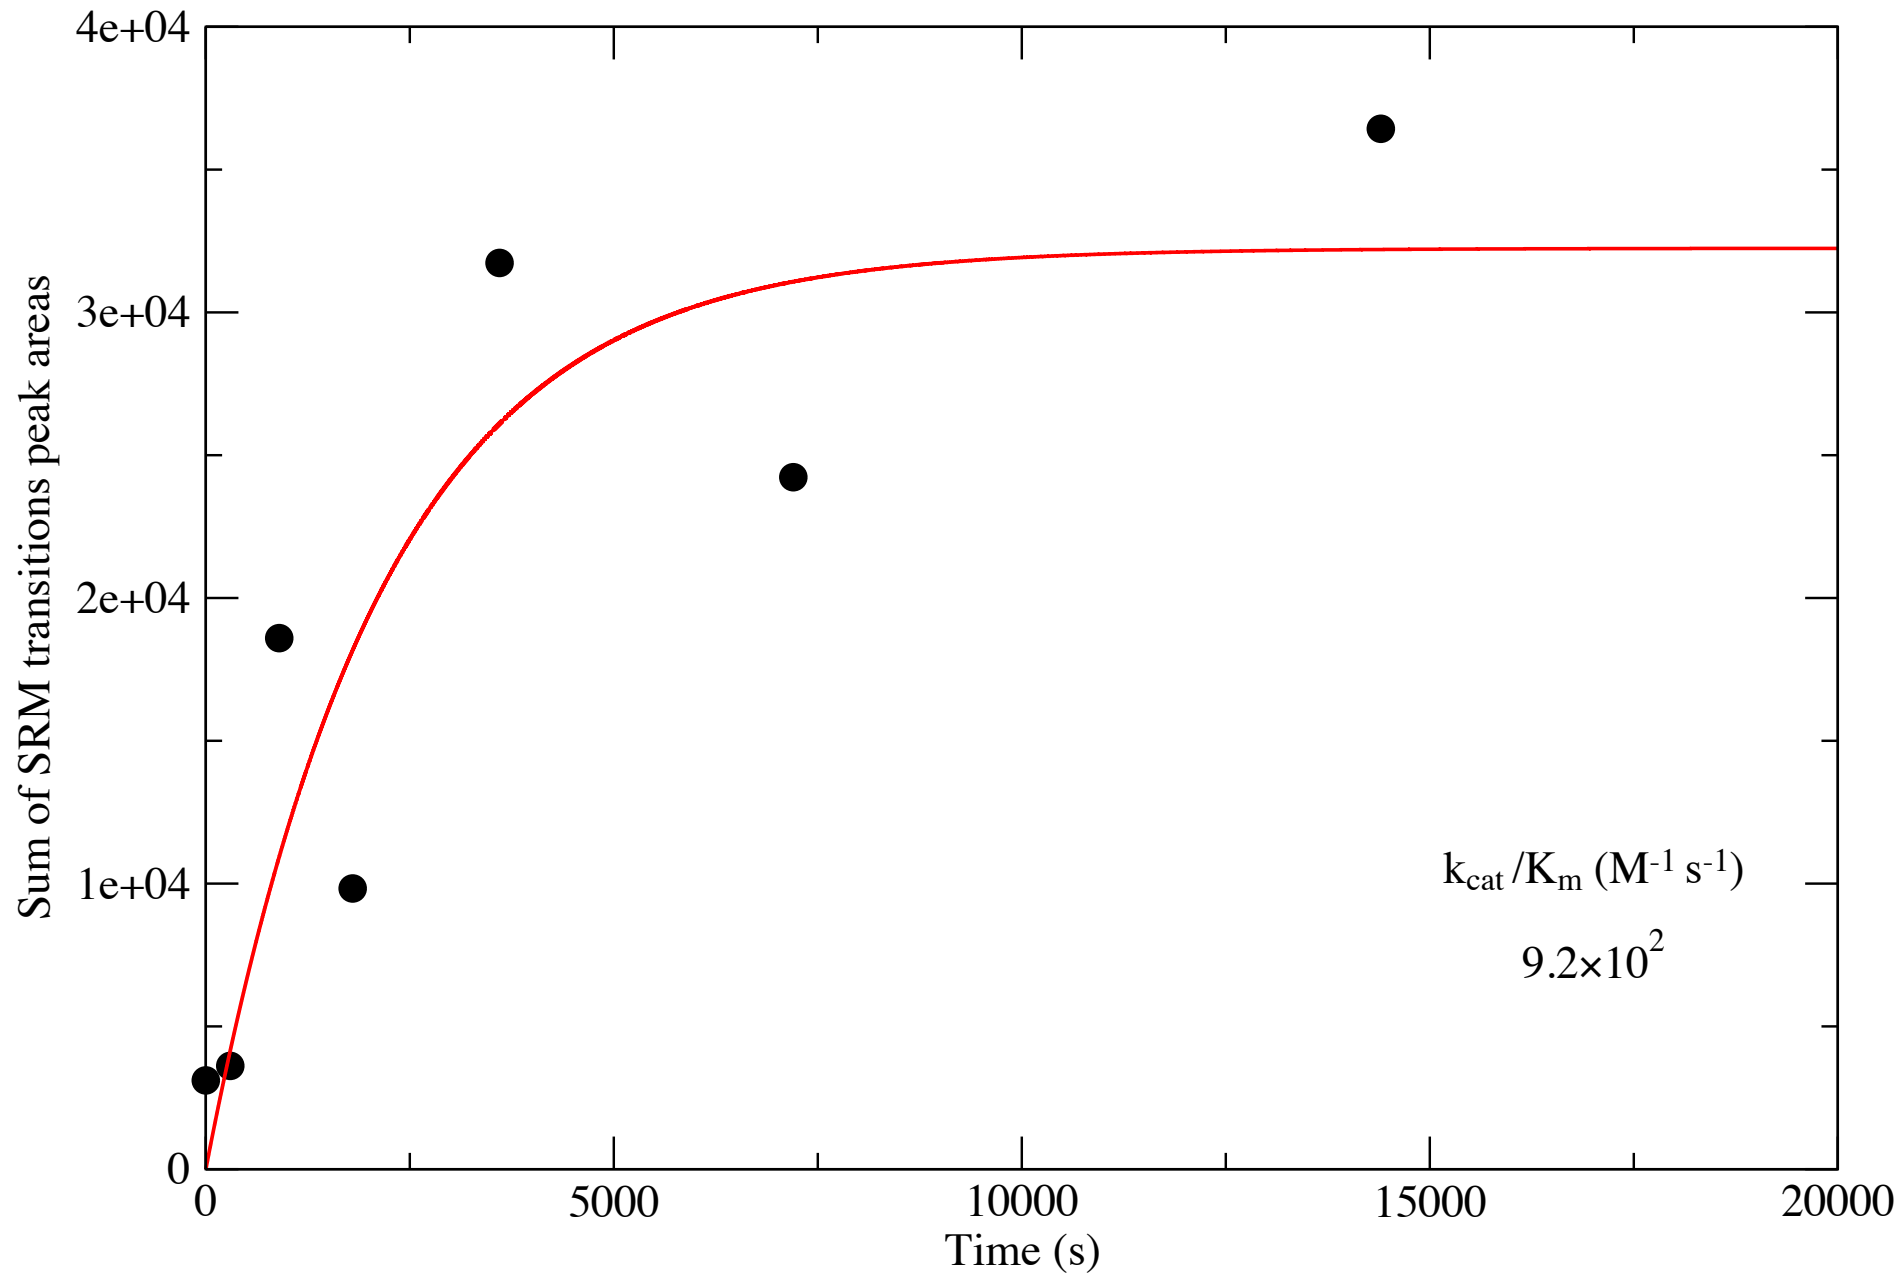



# ETFB\_HUMAN (GVKHSMPNPFCEIAVEEAVR)

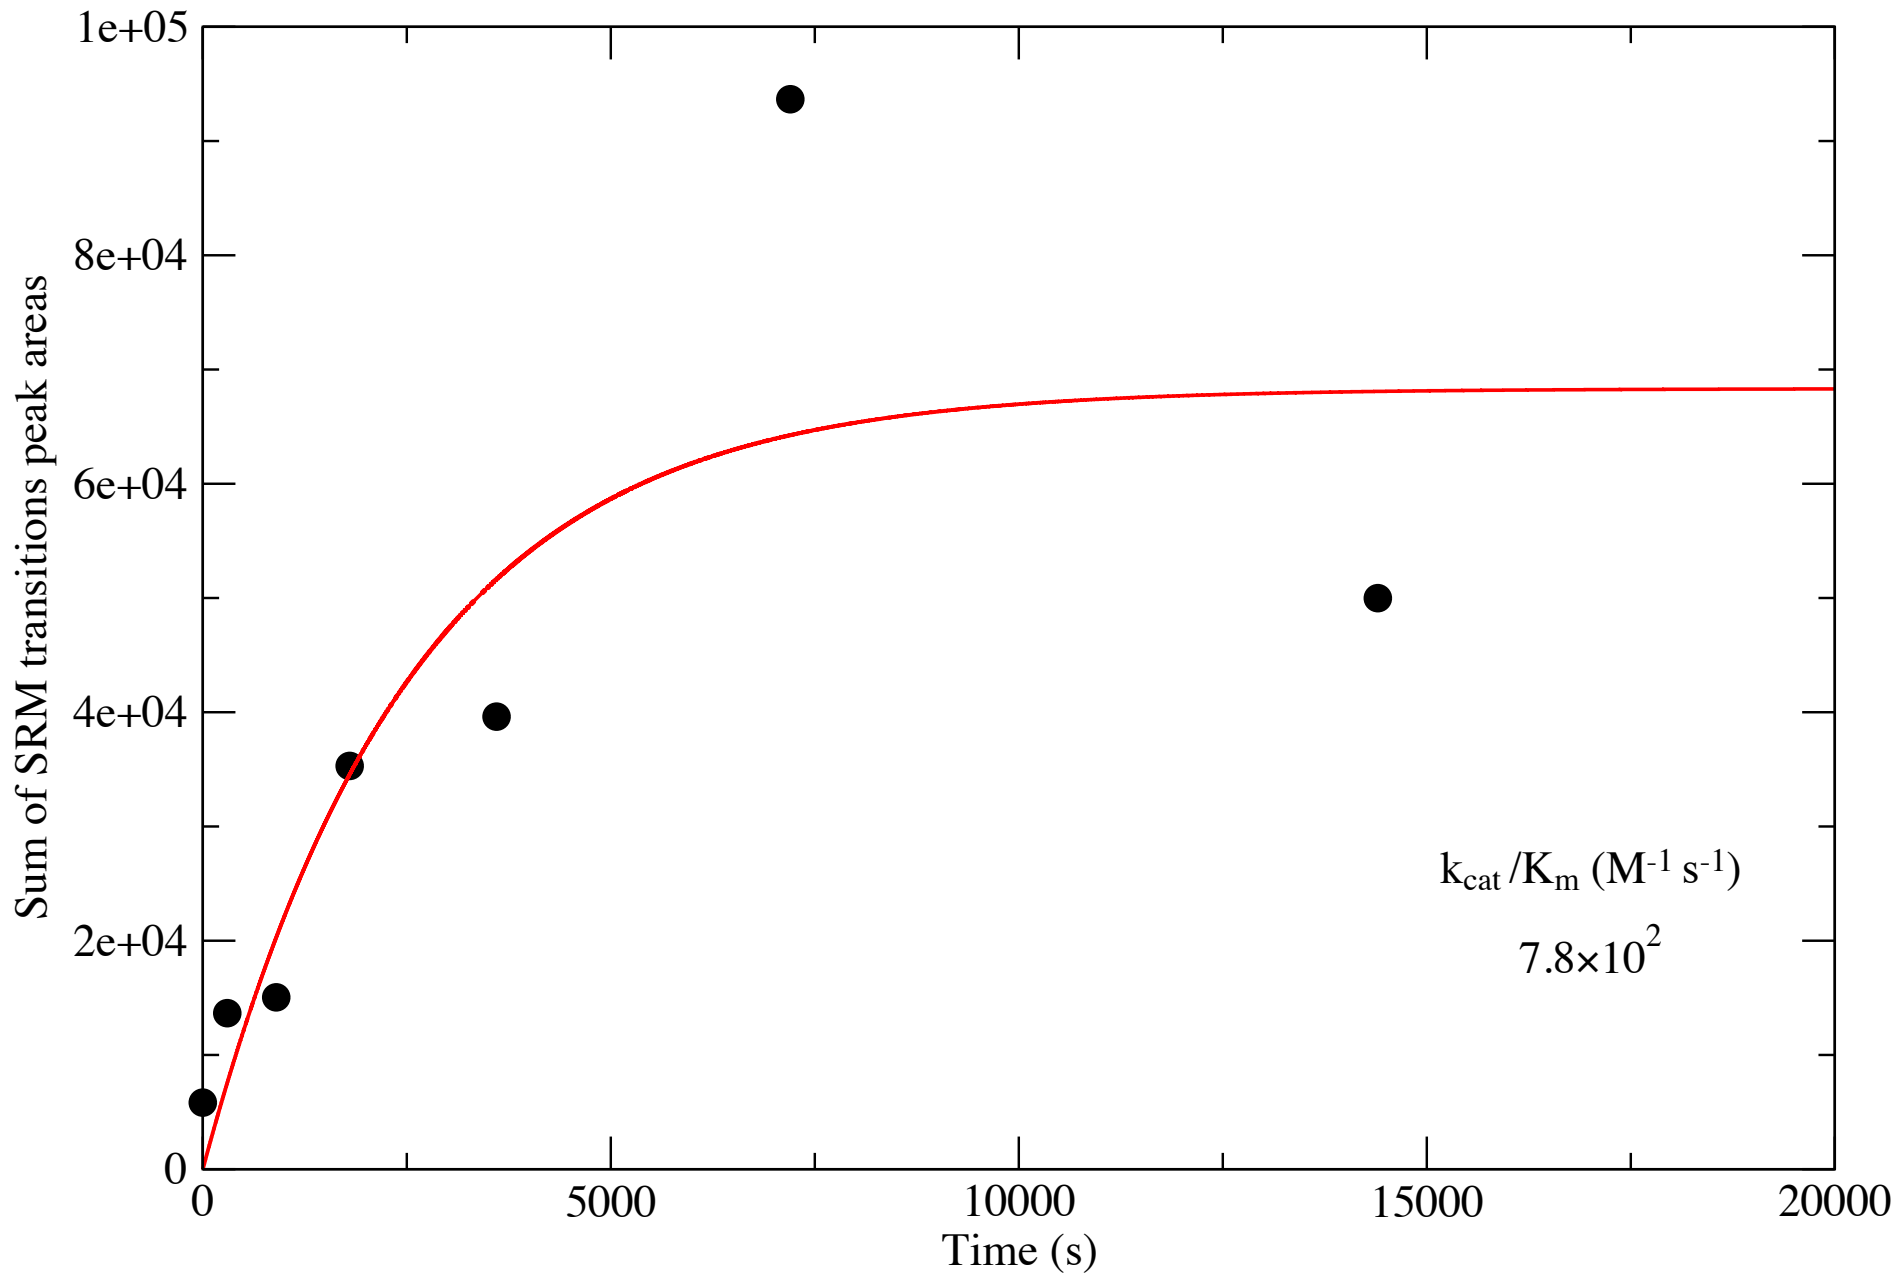

# F101B\_HUMAN (AAAATPAAPSPASLPLAPGCALR)

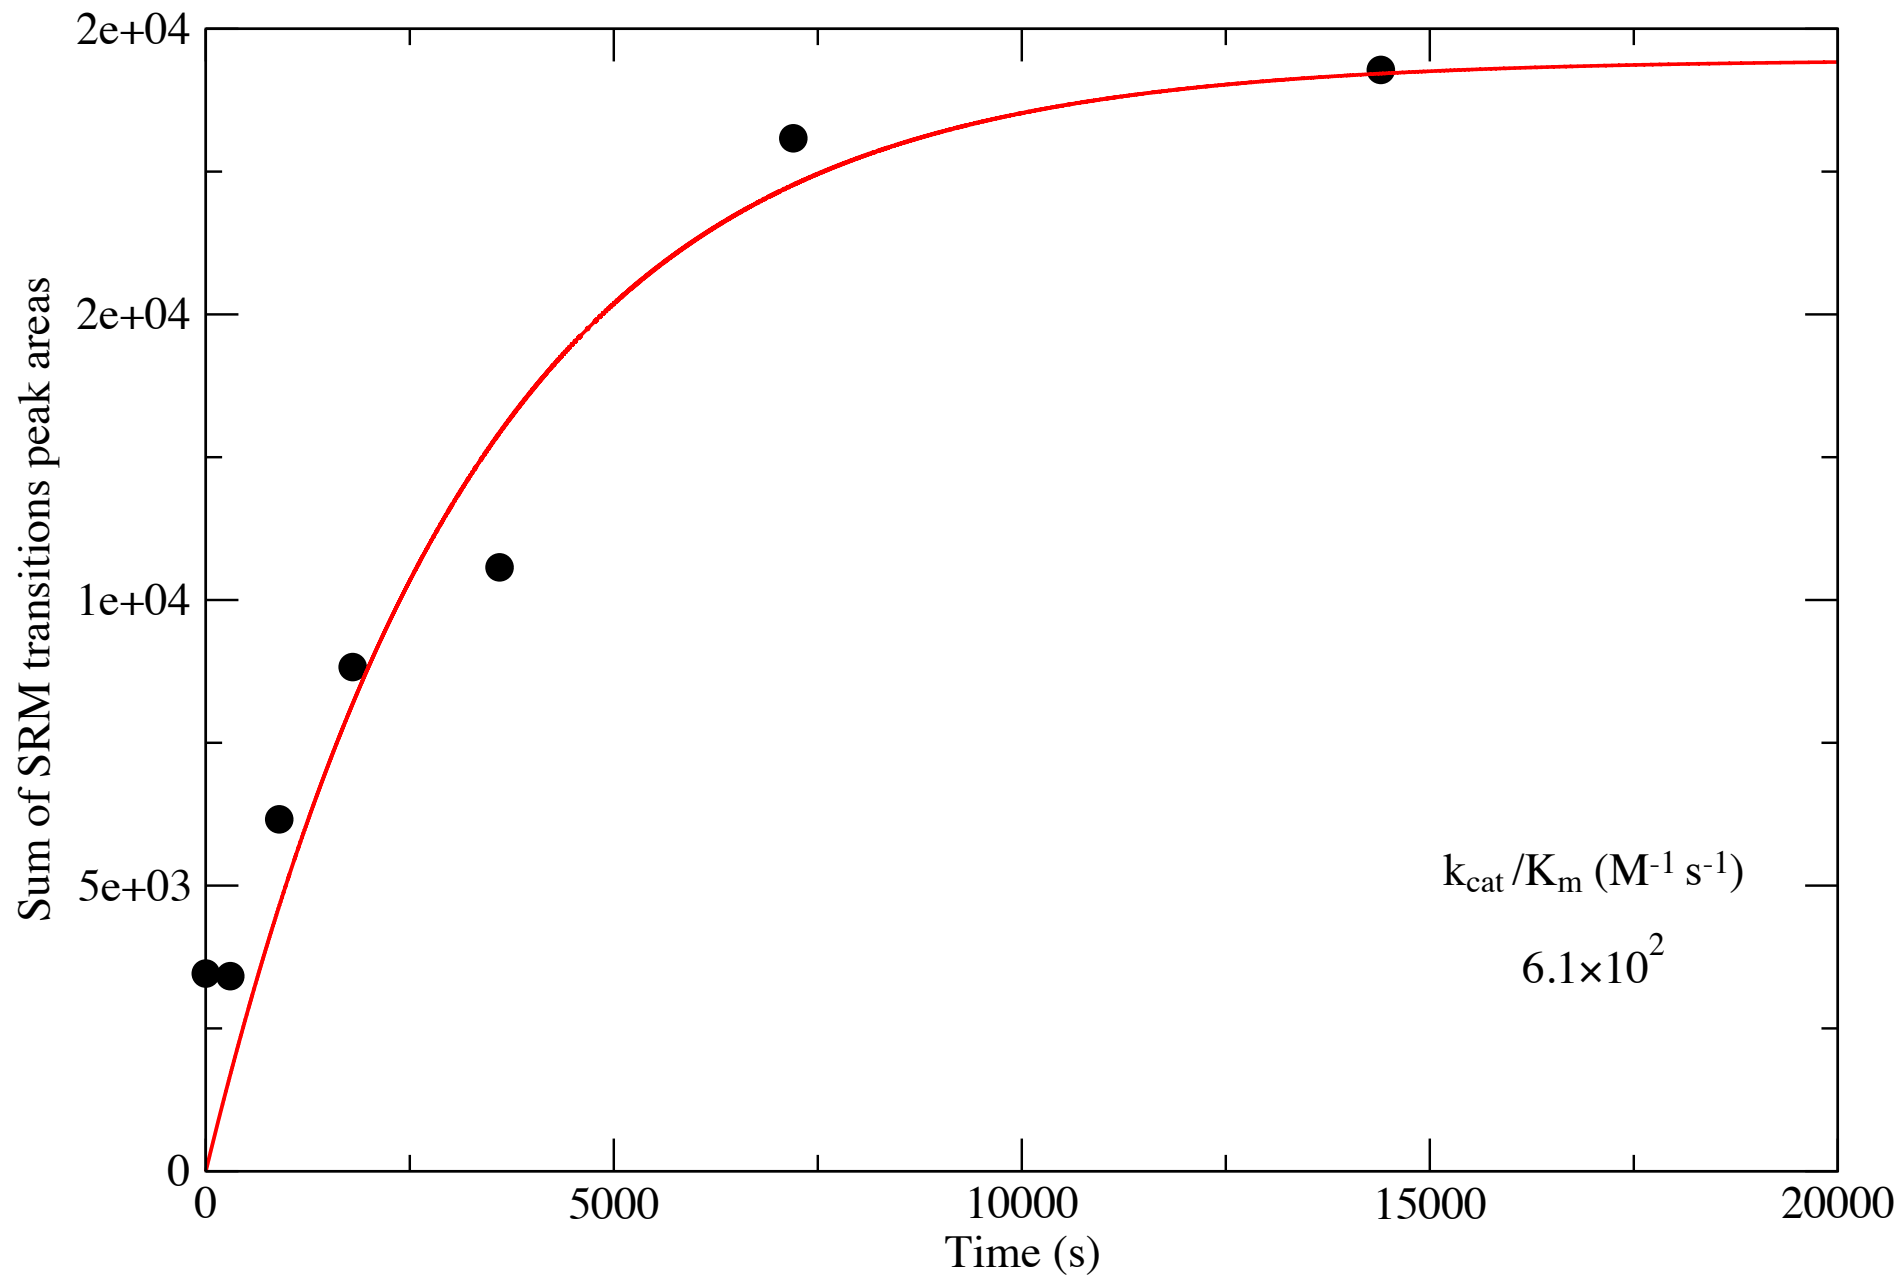

# F117B\_HUMAN (GHRAPPPLVQR)

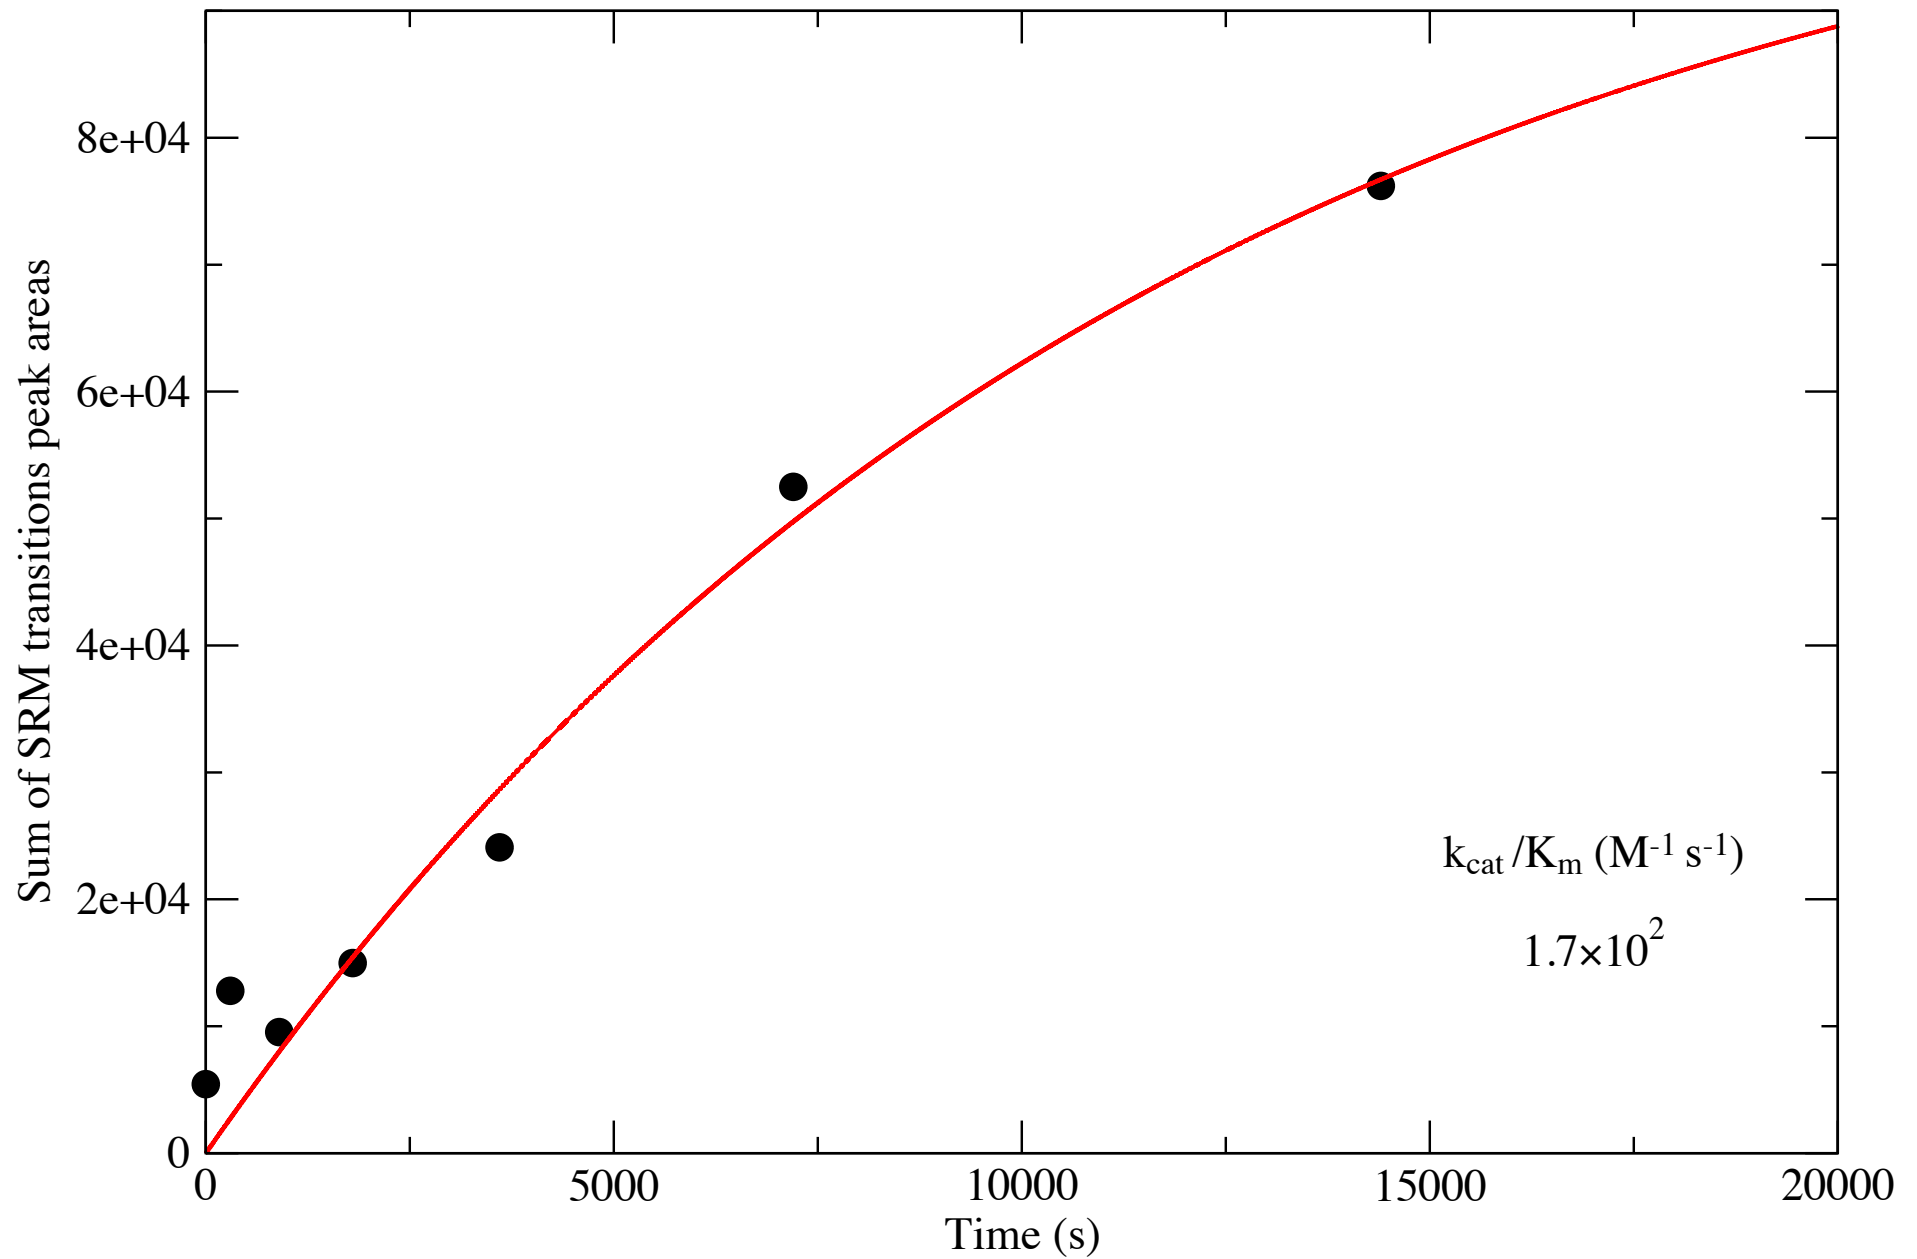

# FA50A\_HUMAN (AVEAELK)

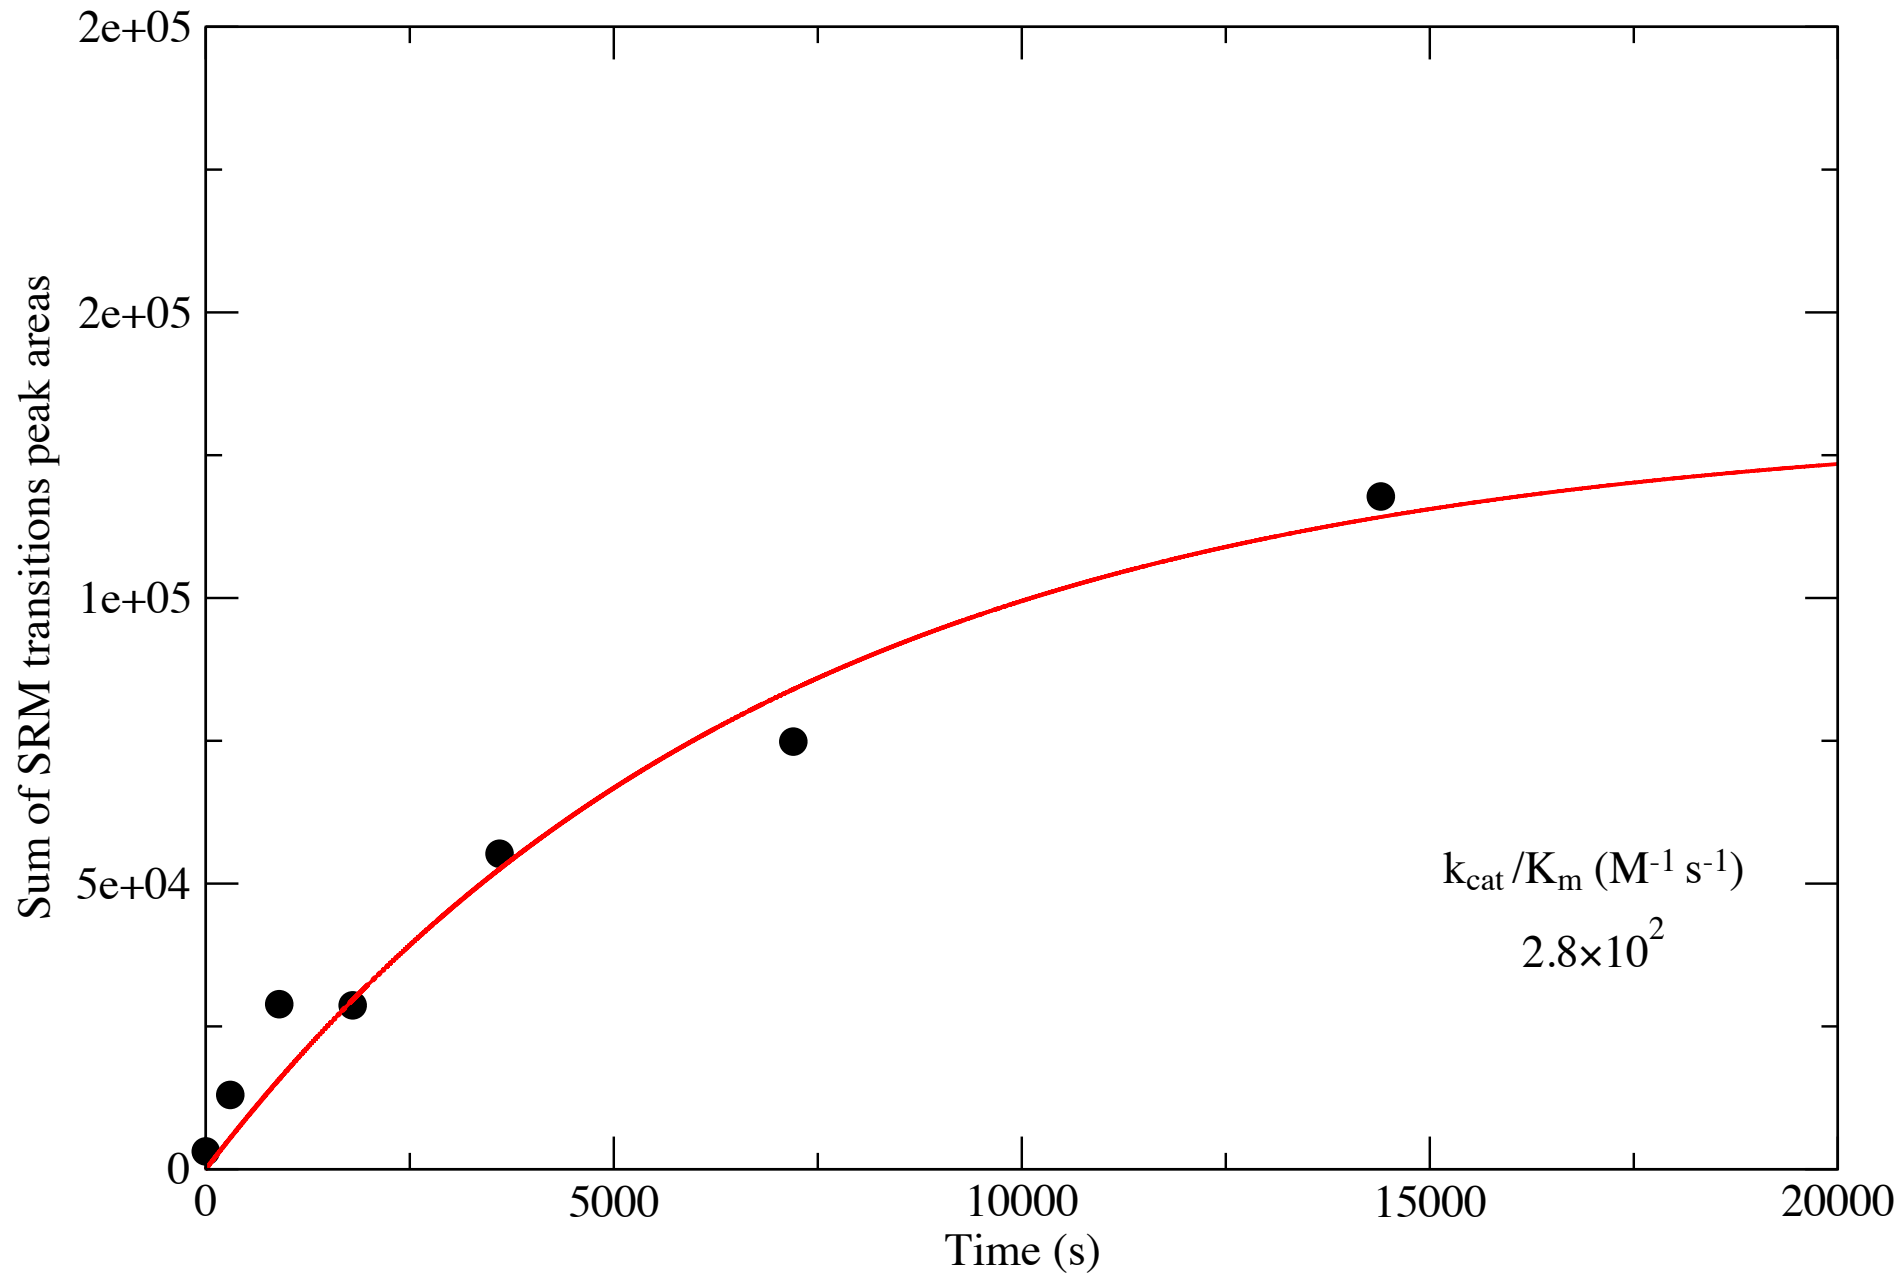

# FBLN1\_HUMAN (GVTCEDIDECALPTGGGHICSYR)

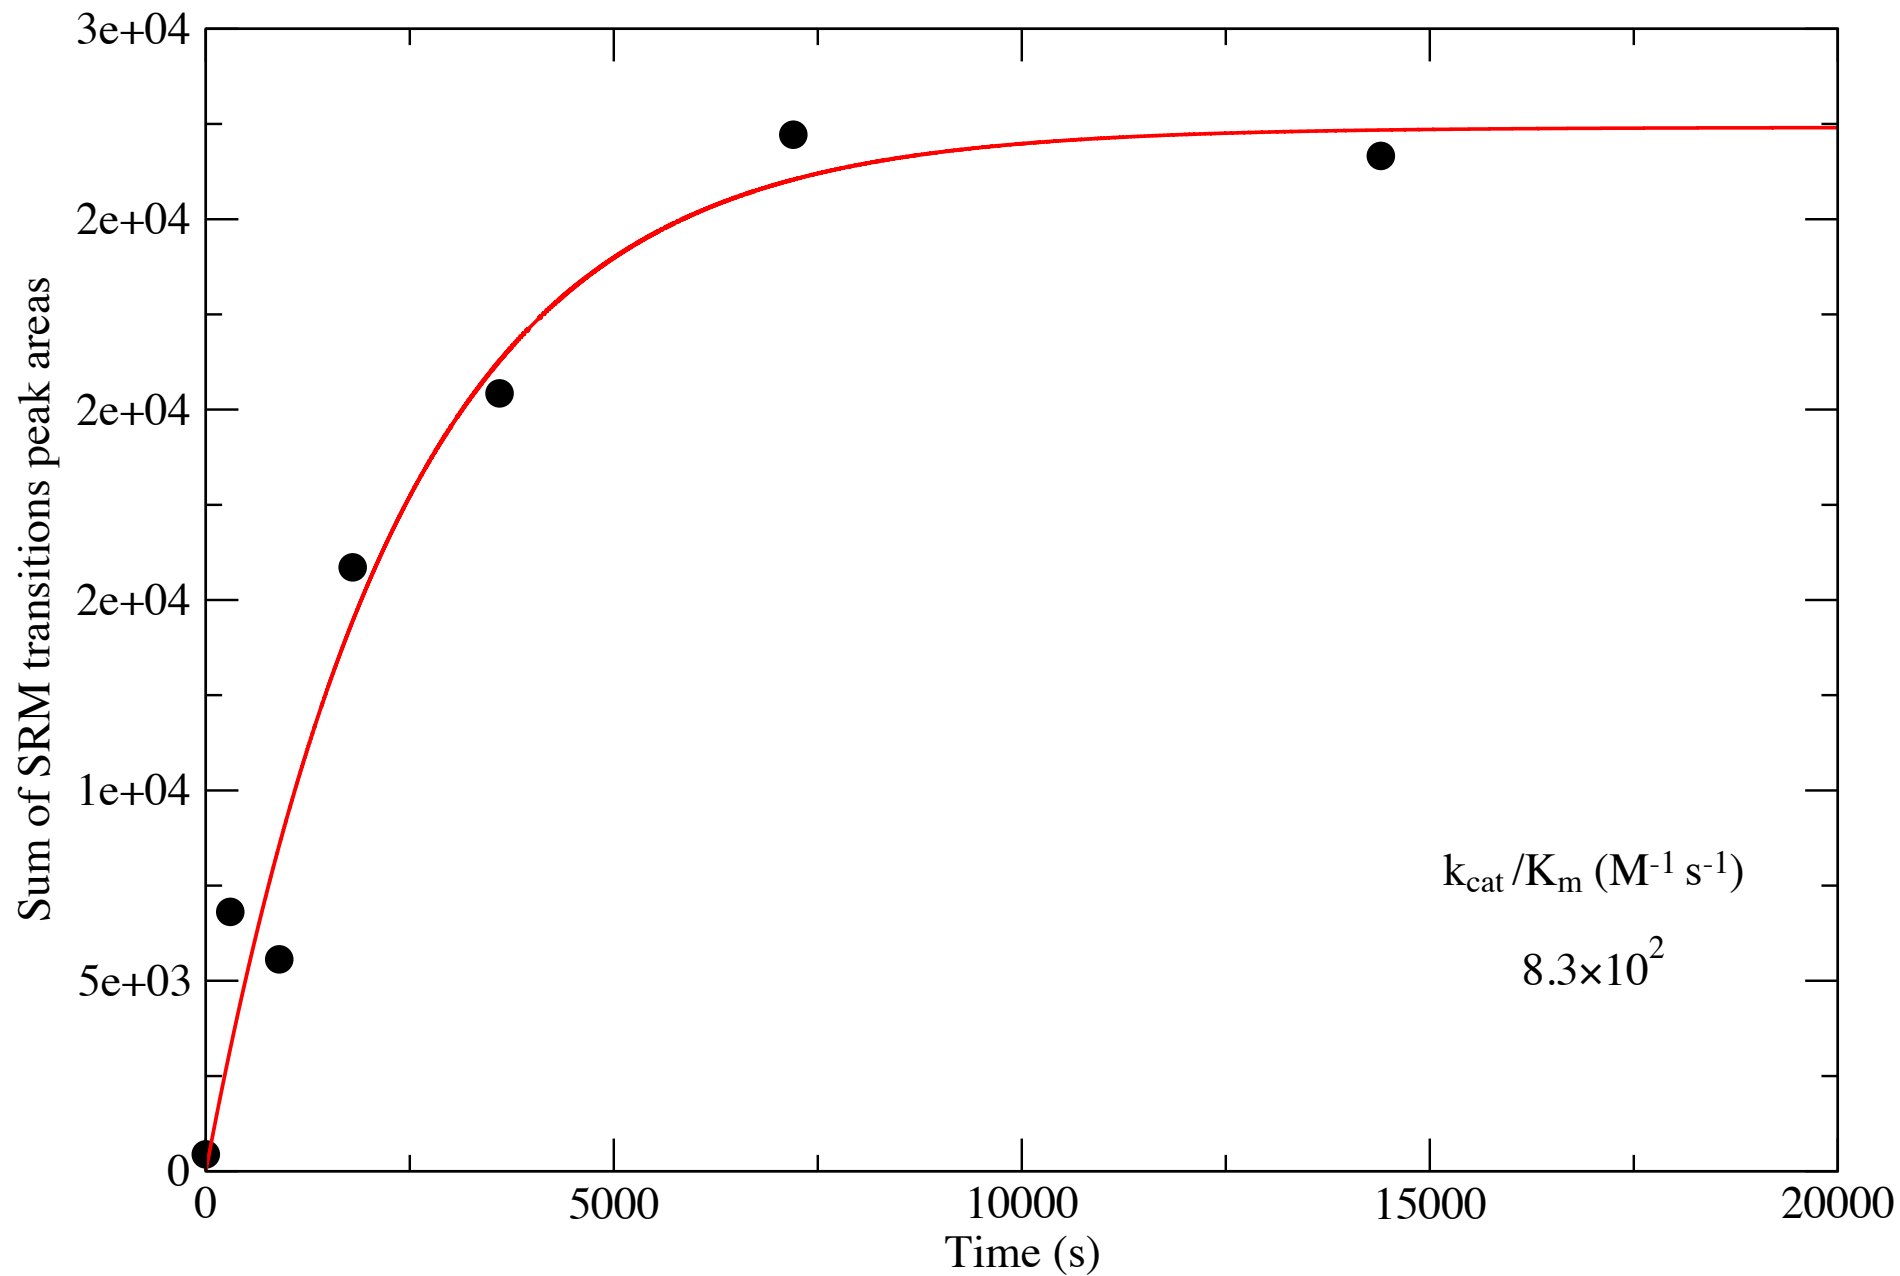

# FIP1\_HUMAN (SFEDKPWR)

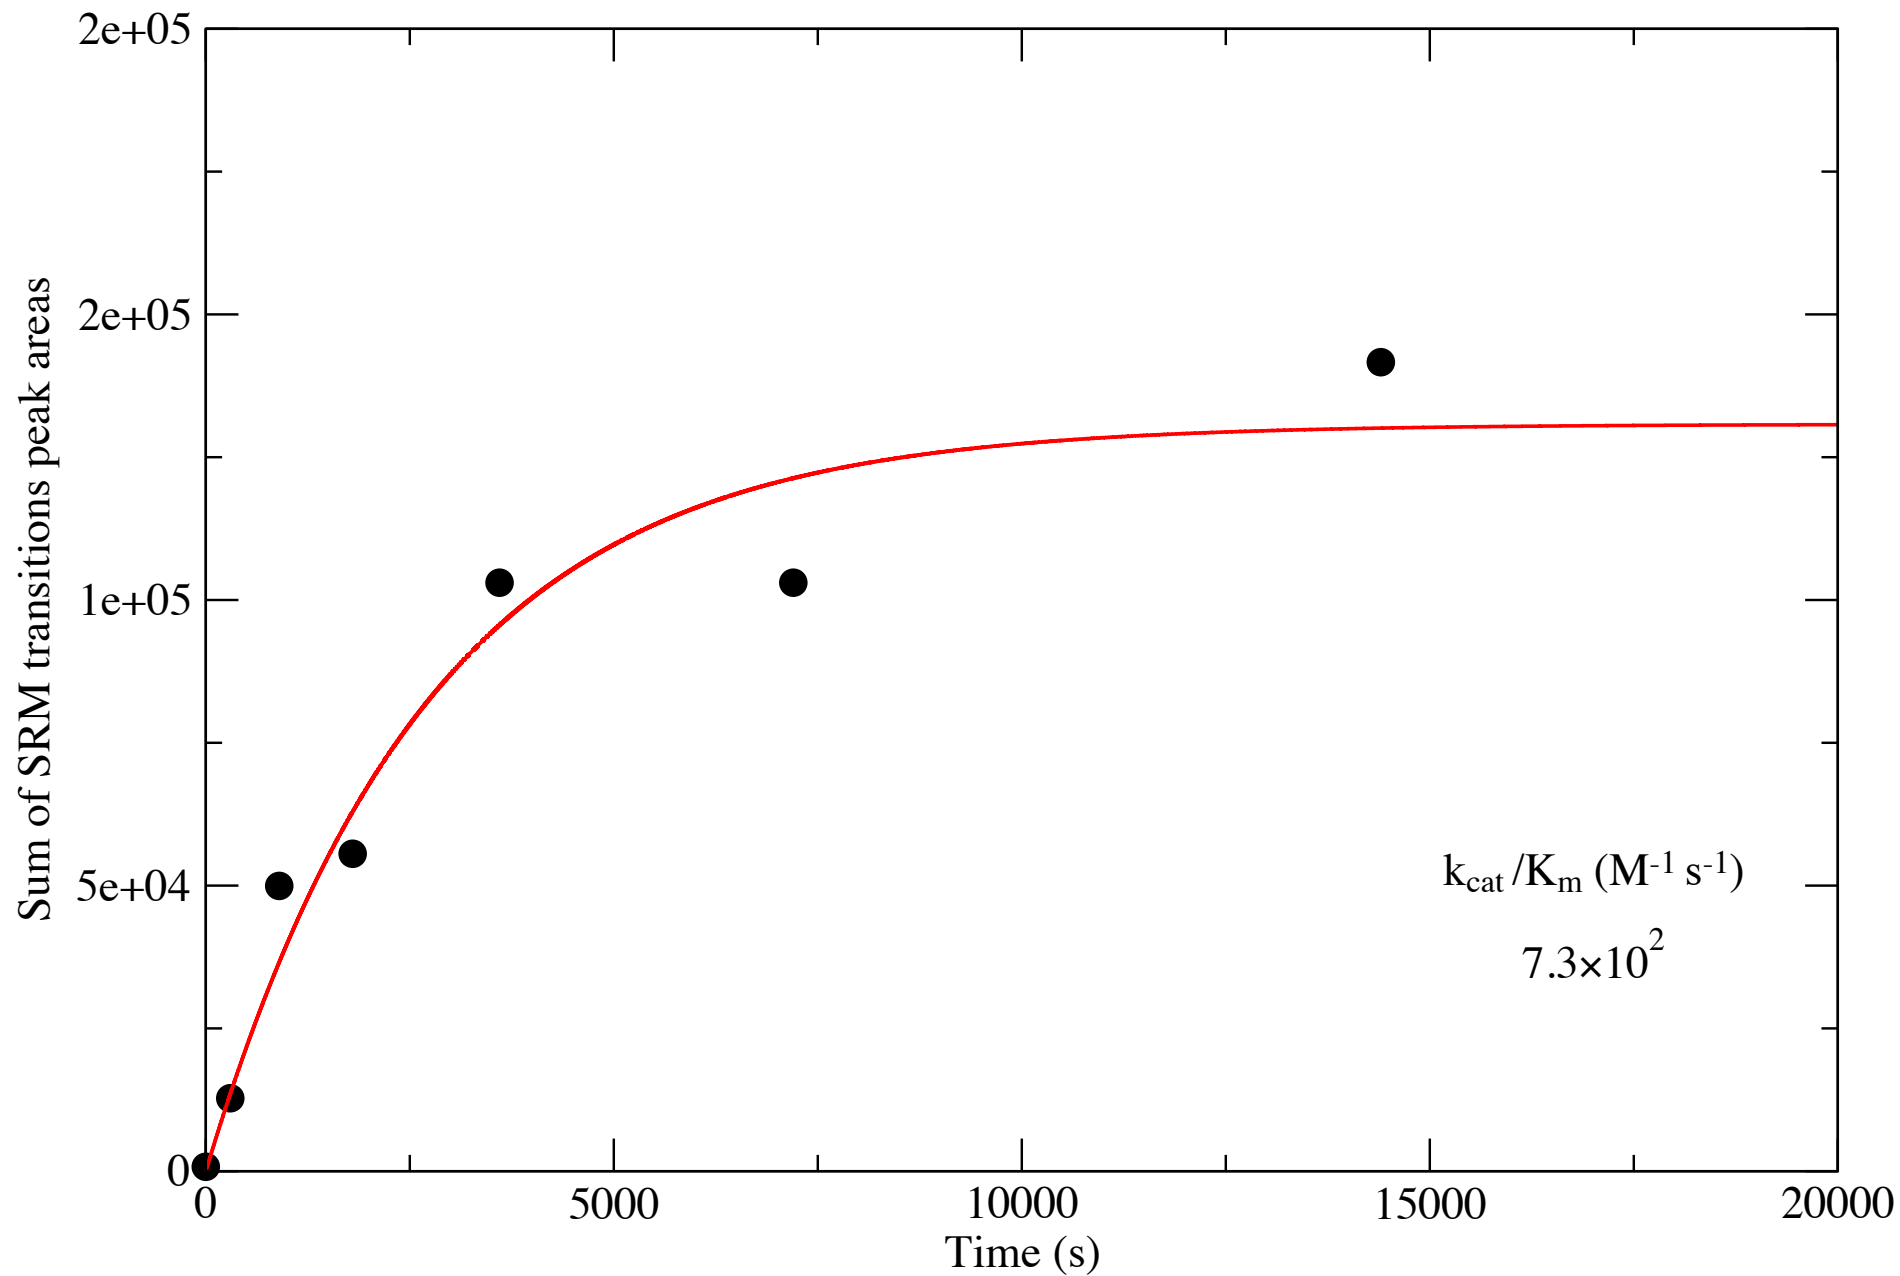

# FNBP4\_HUMAN (AITAPQPAAPVGASAPPPTPPRPEPK)

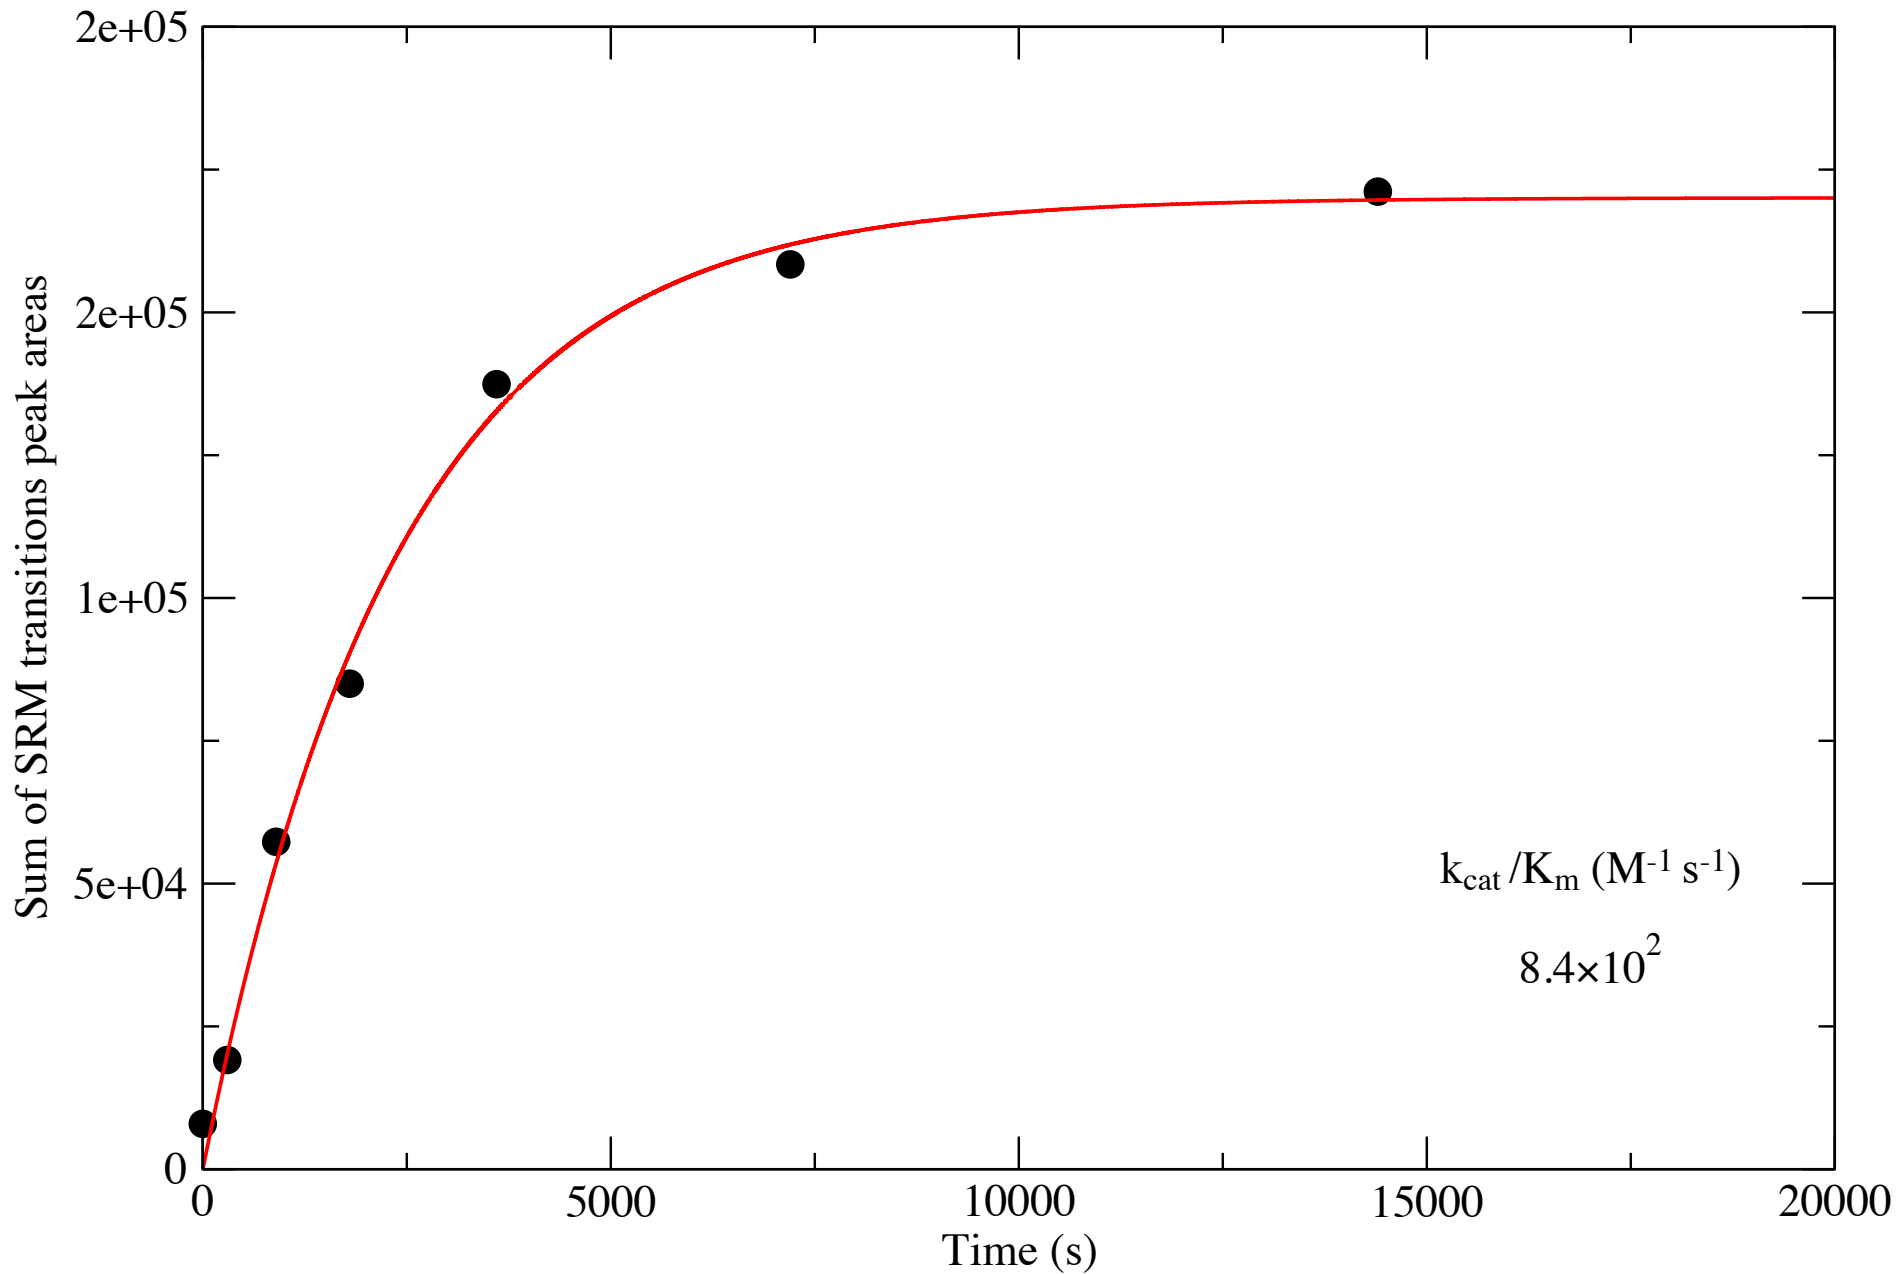

# FYB\_HUMAN (GFPAPPK)

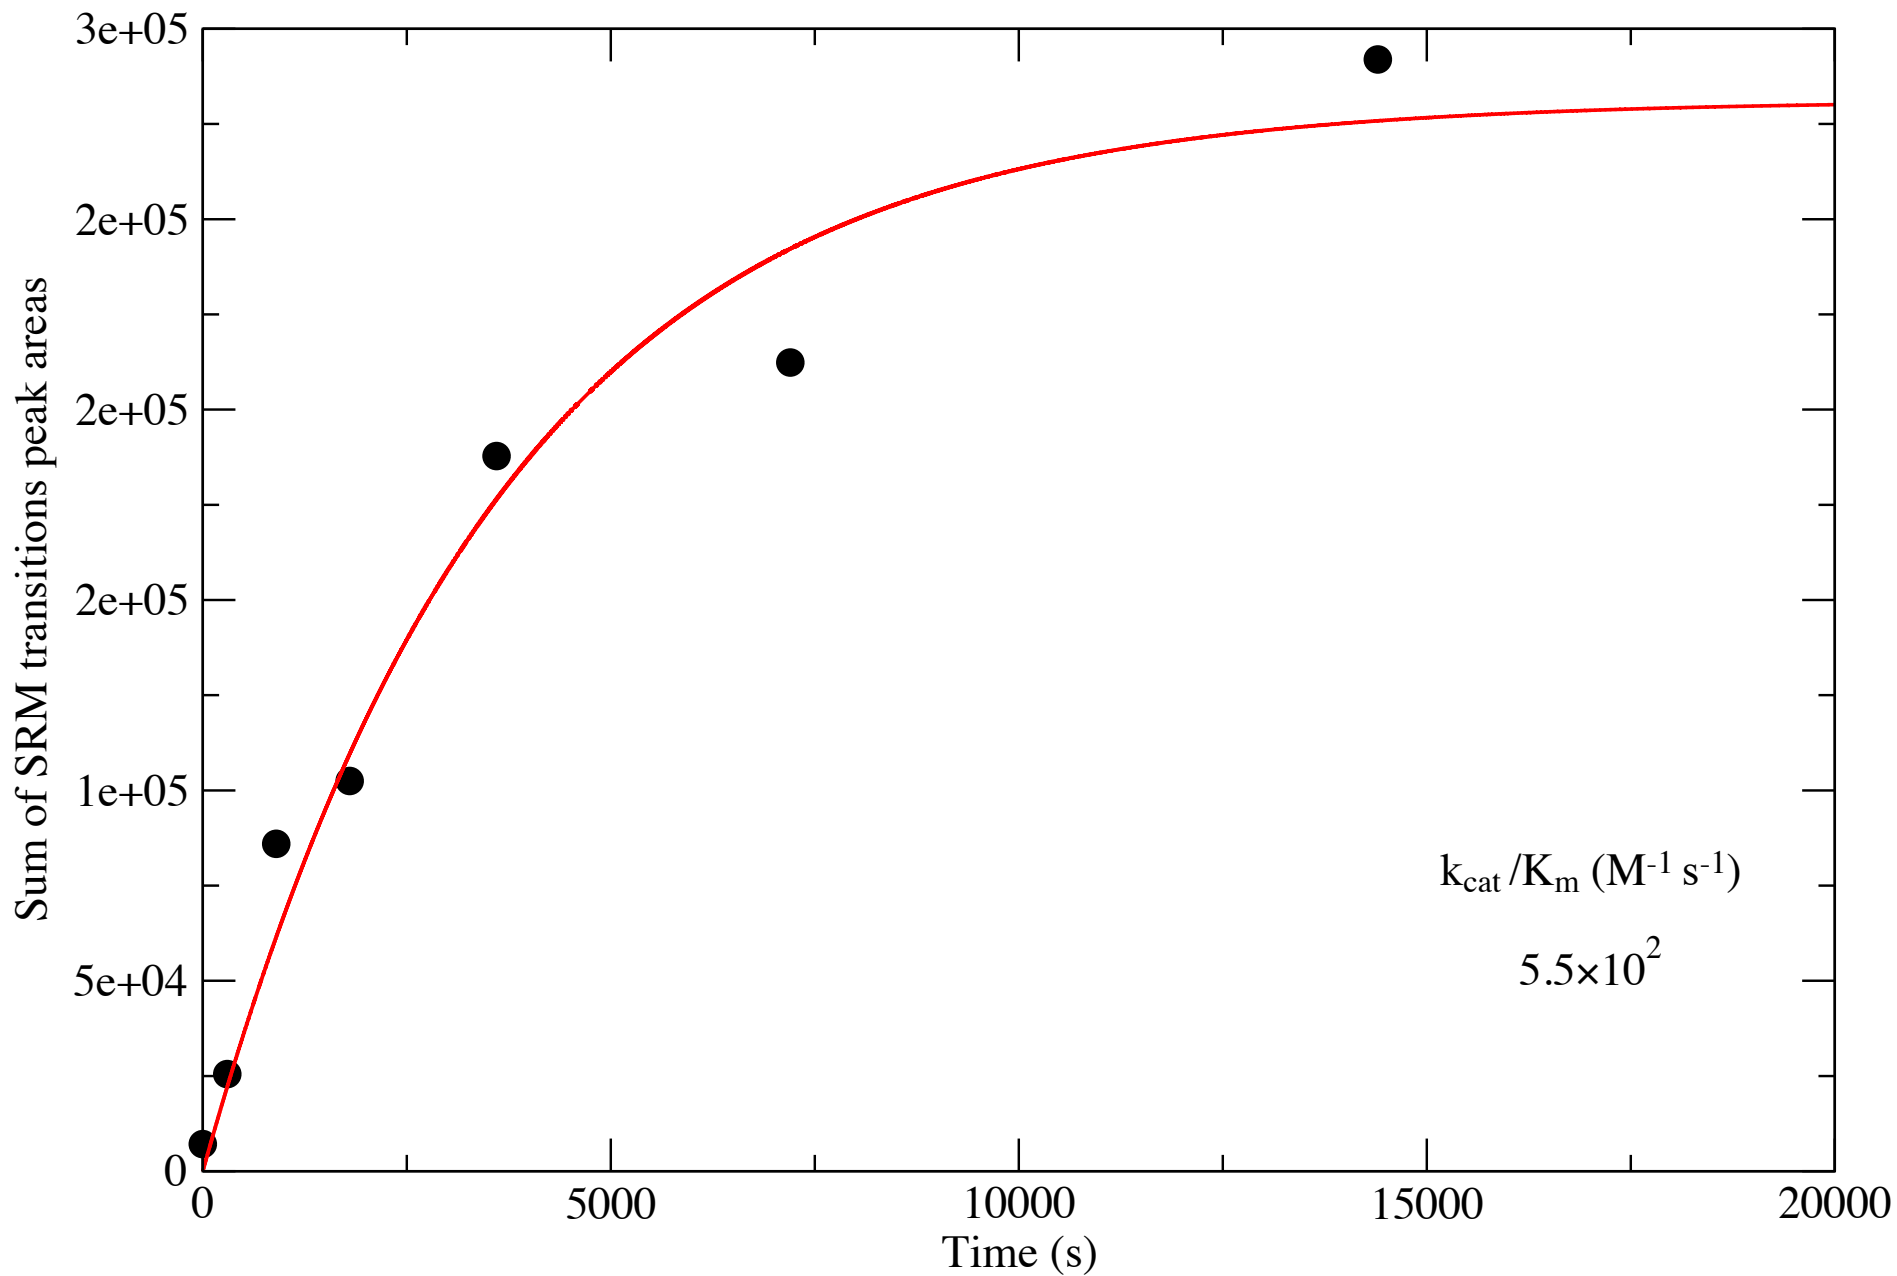



# GABP2\_HUMAN (AVVVTEGELEER)

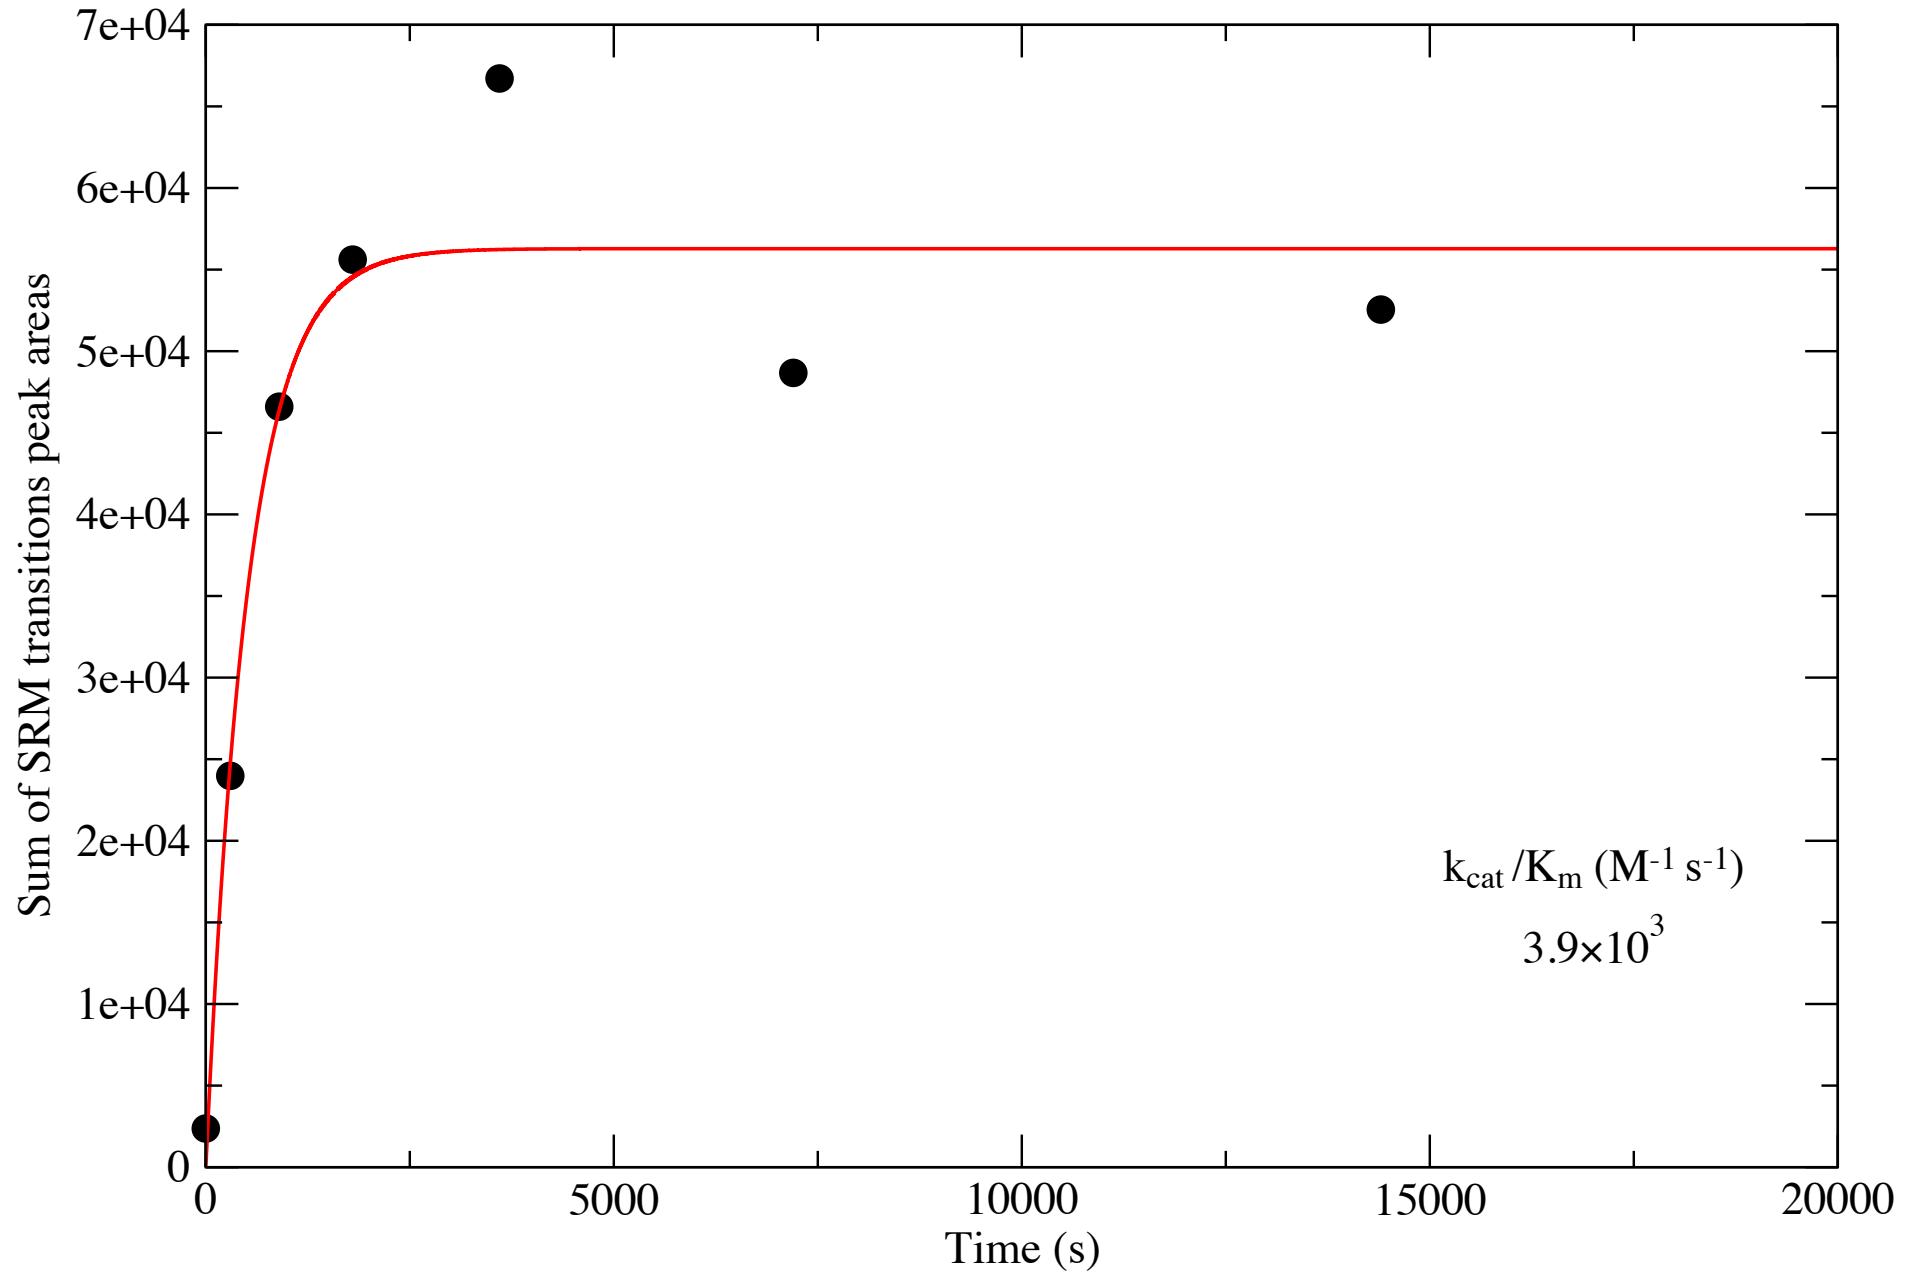

# GATC\_HUMAN (GVEPMESVLEDR)

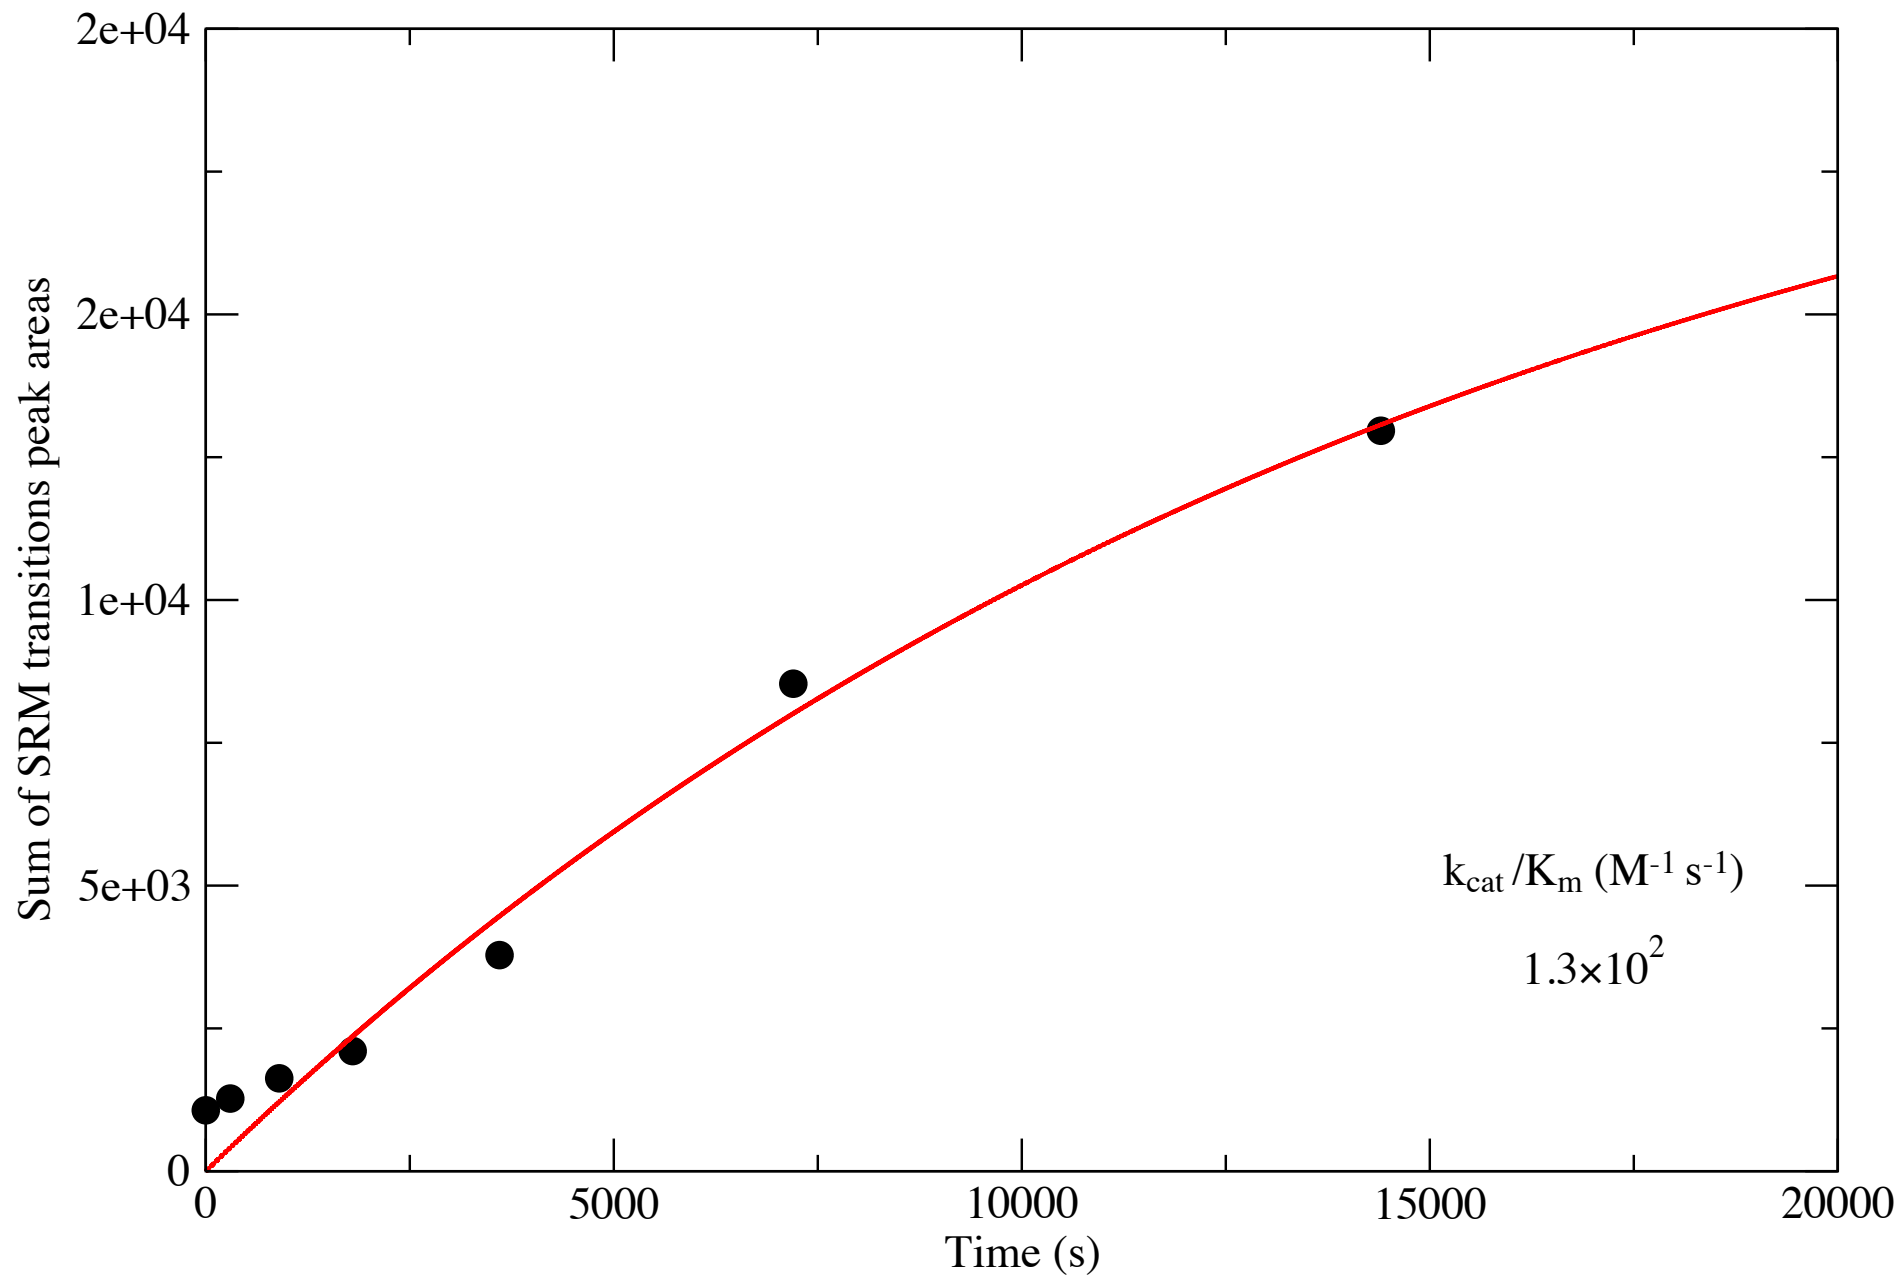

# GIT1\_HUMAN (AIYSVHVVPAGLYR)

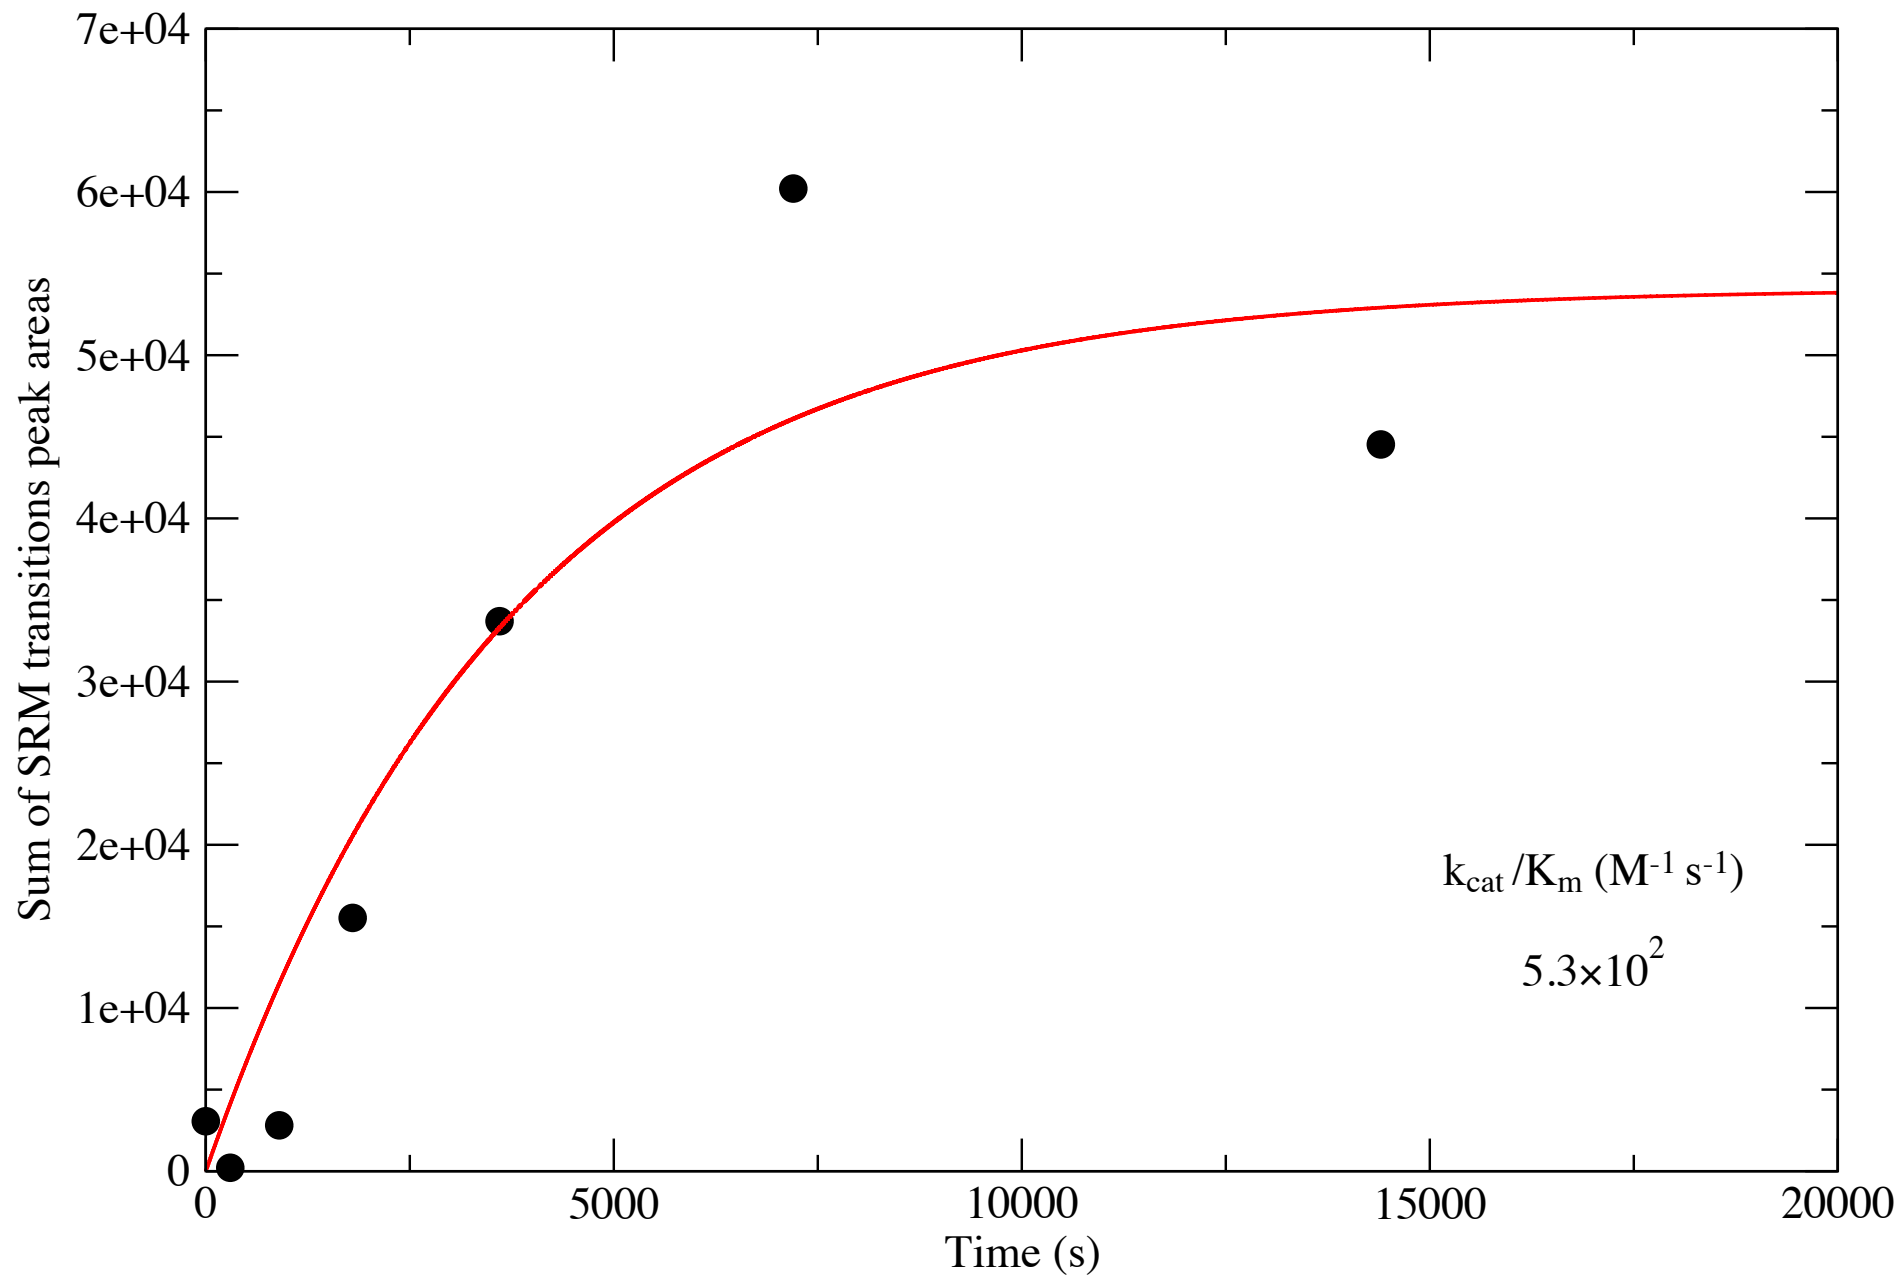

# GIT1\_HUMAN (SVASDEDTDQEPLRSTGATR)

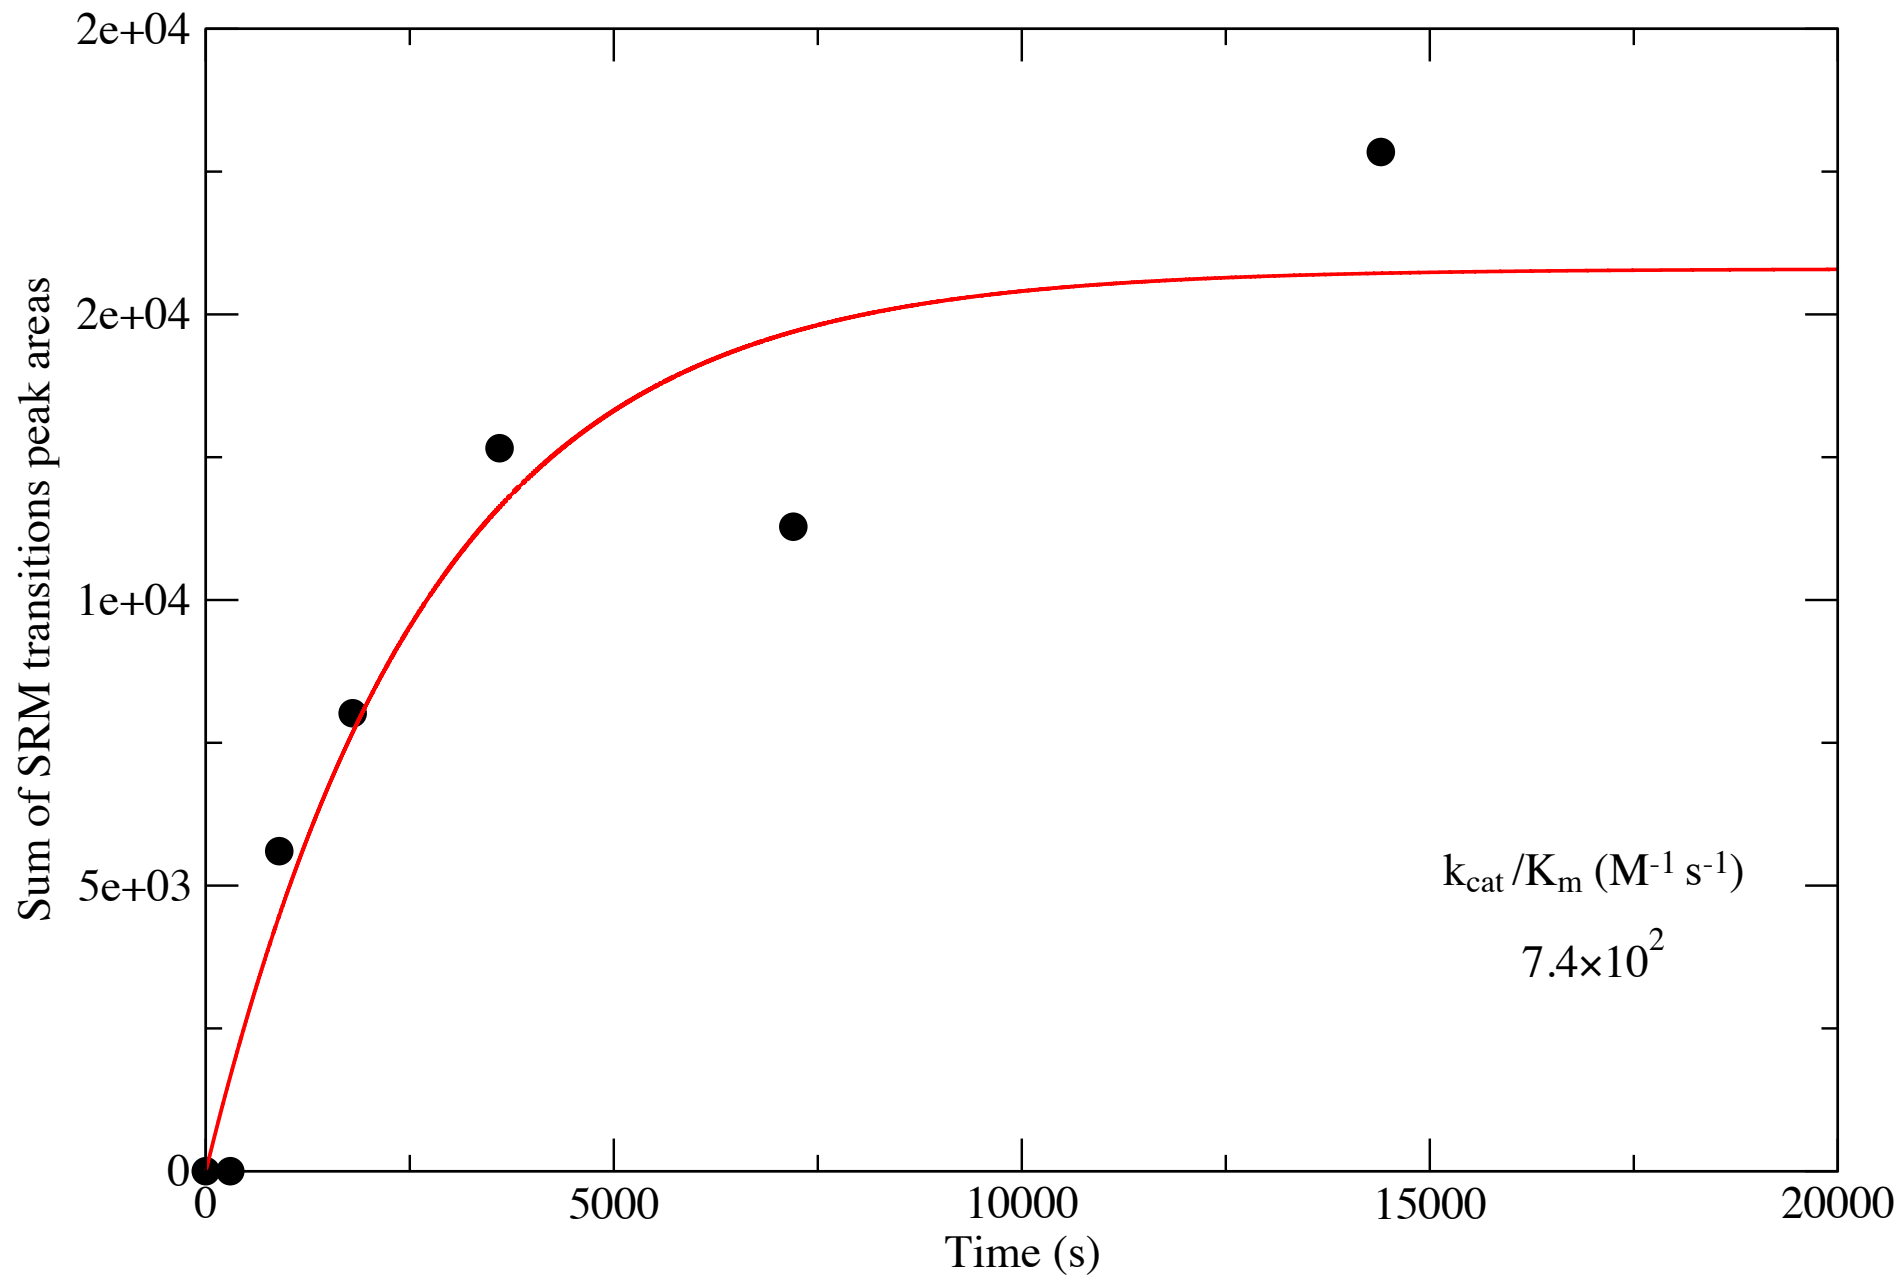

# GLU2B\_HUMAN (ATSFYDR)

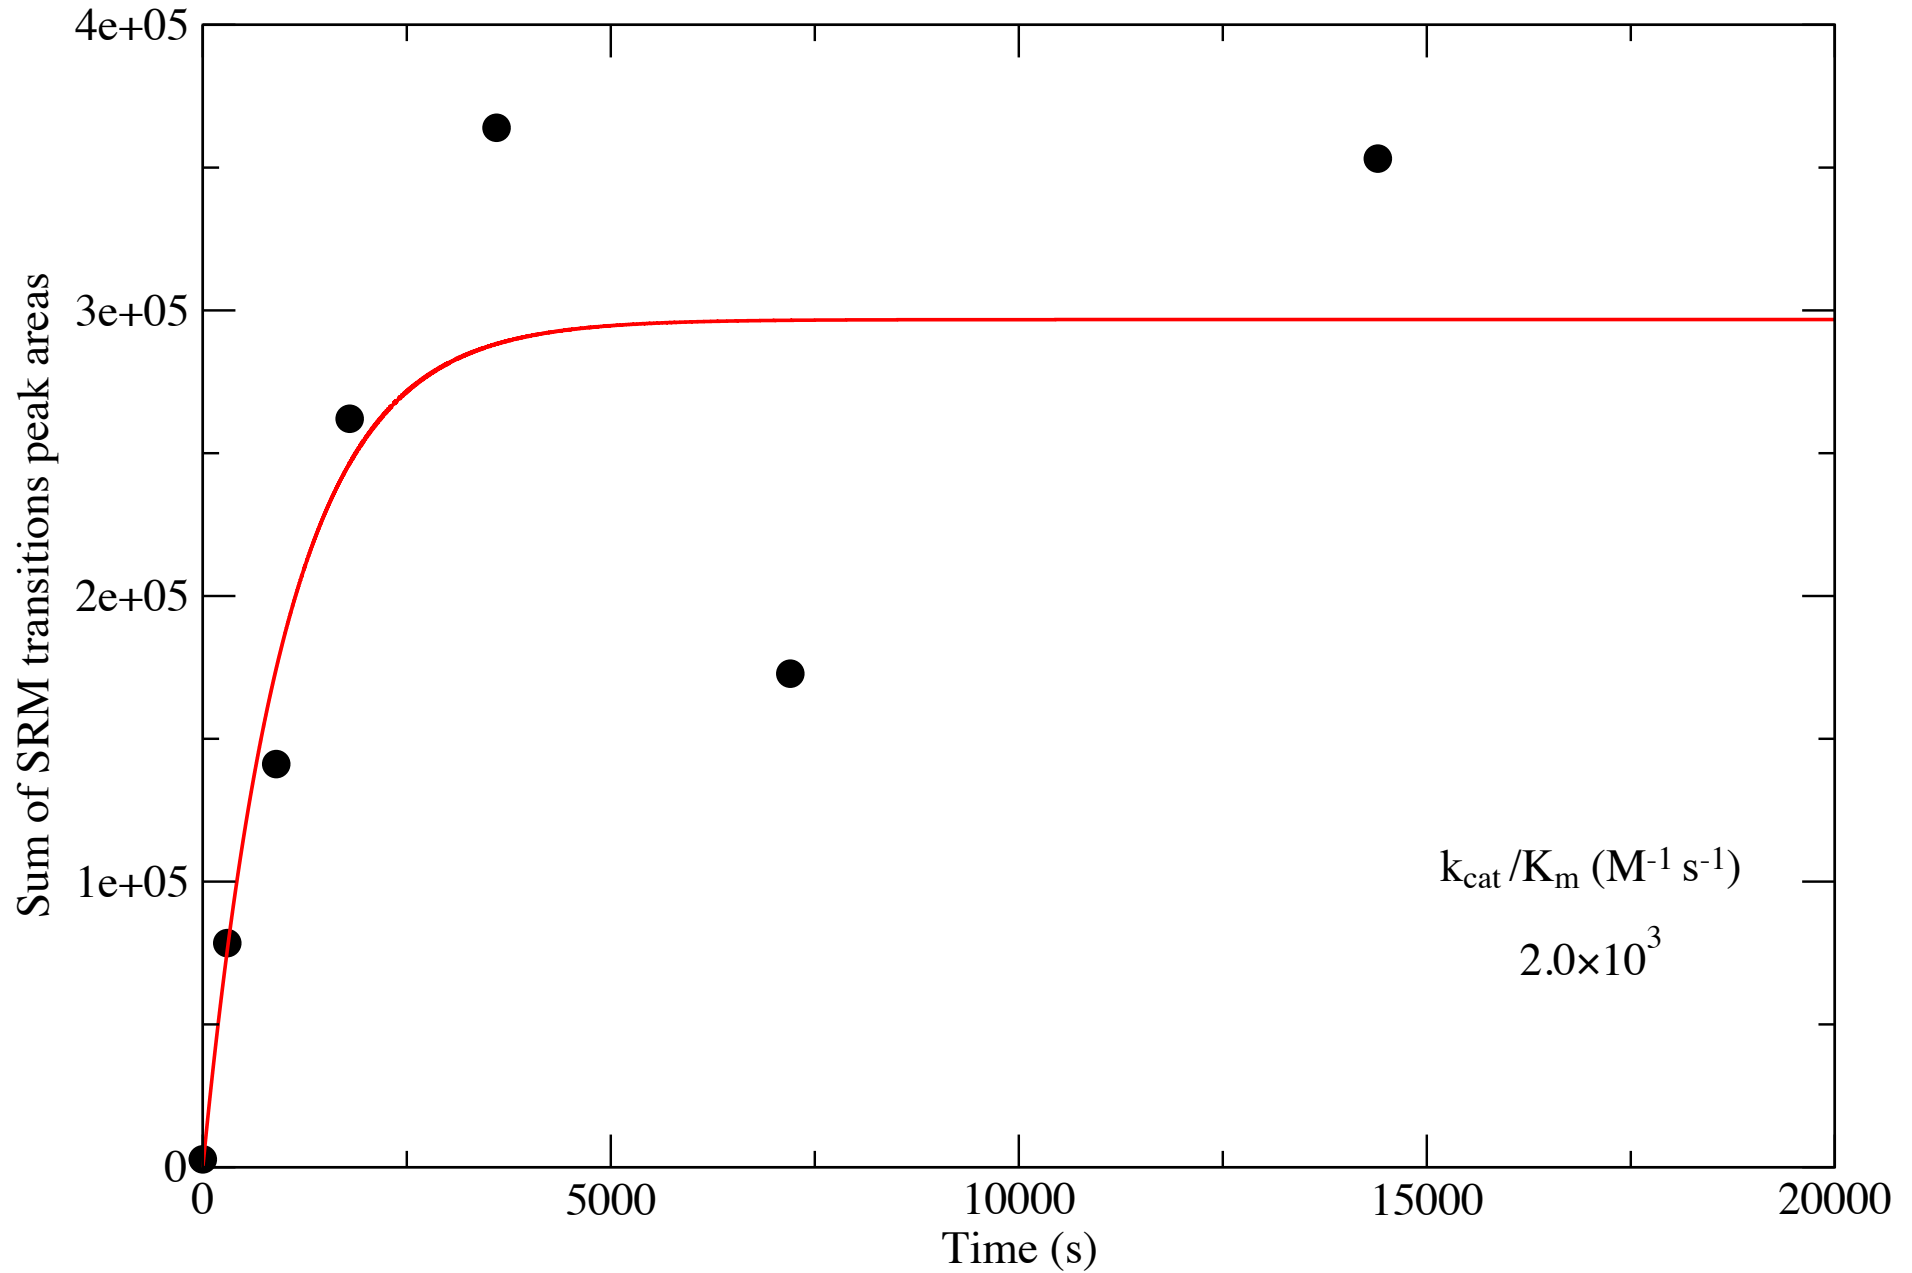

# GNL1\_HUMAN (SAMEPTGPTQER)

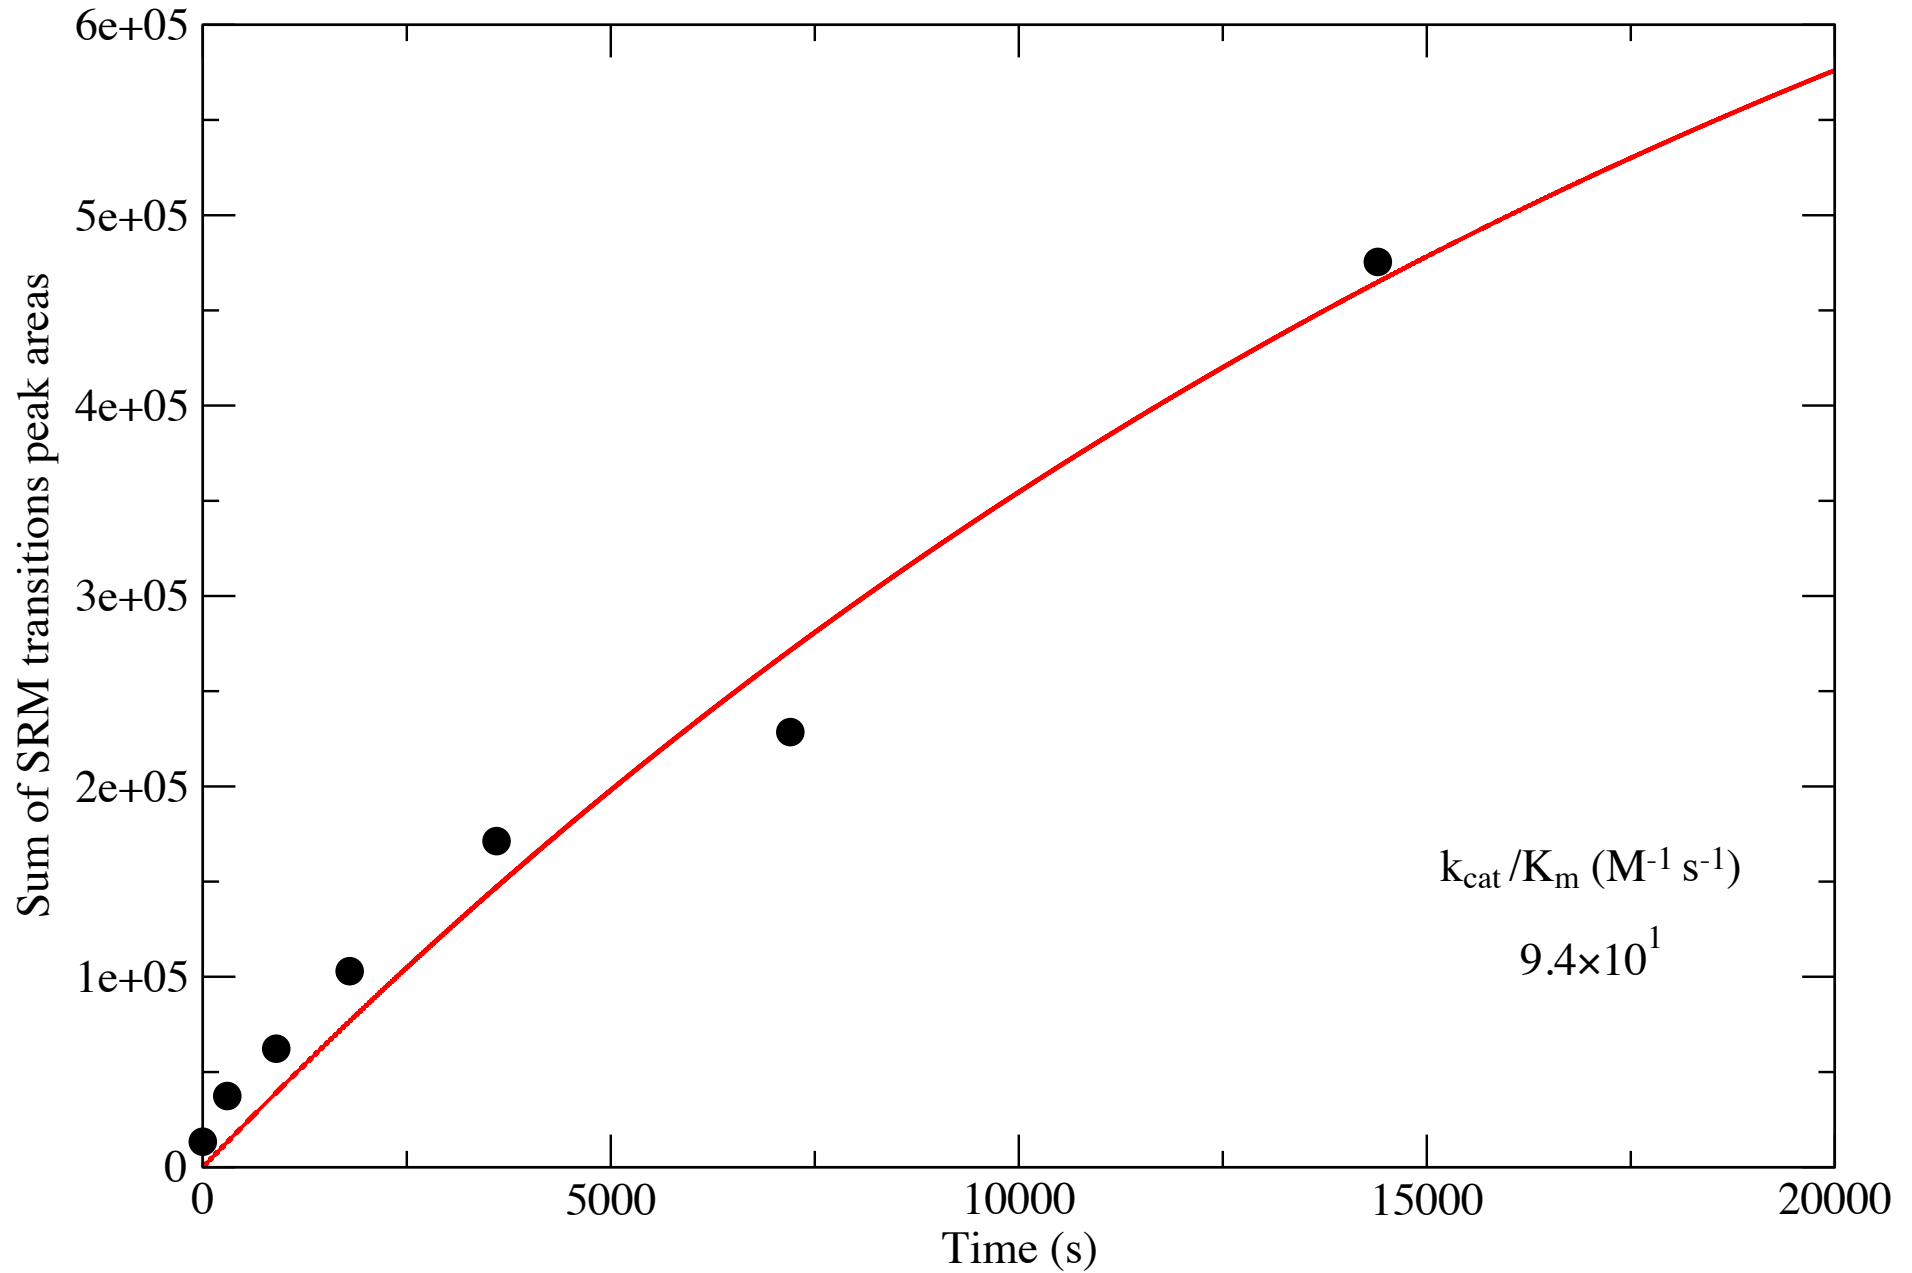

# GON4L\_HUMAN (SFQPMDDSLIAFR)

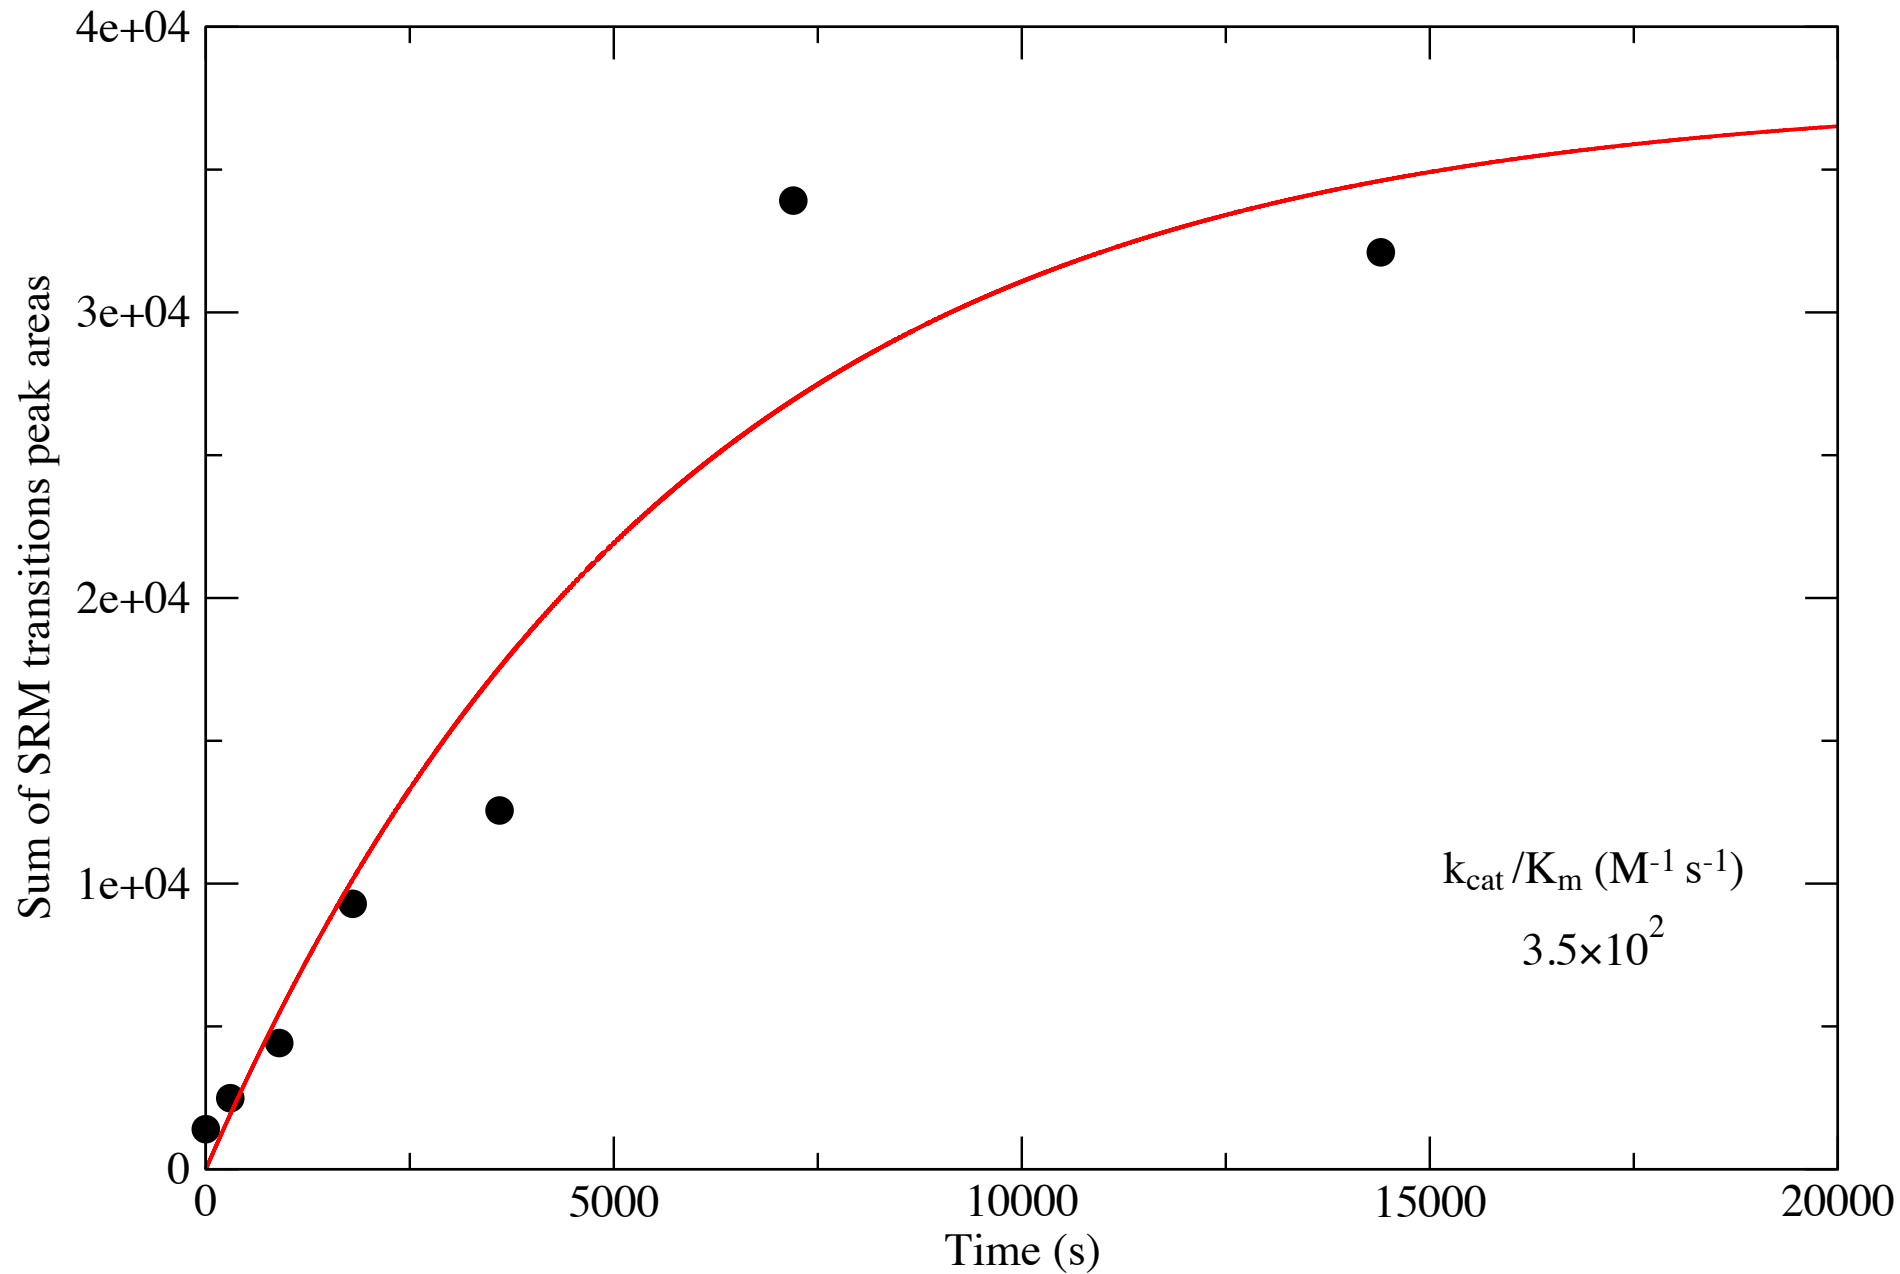

# GPTC2\_HUMAN (FAVDNVGNR)

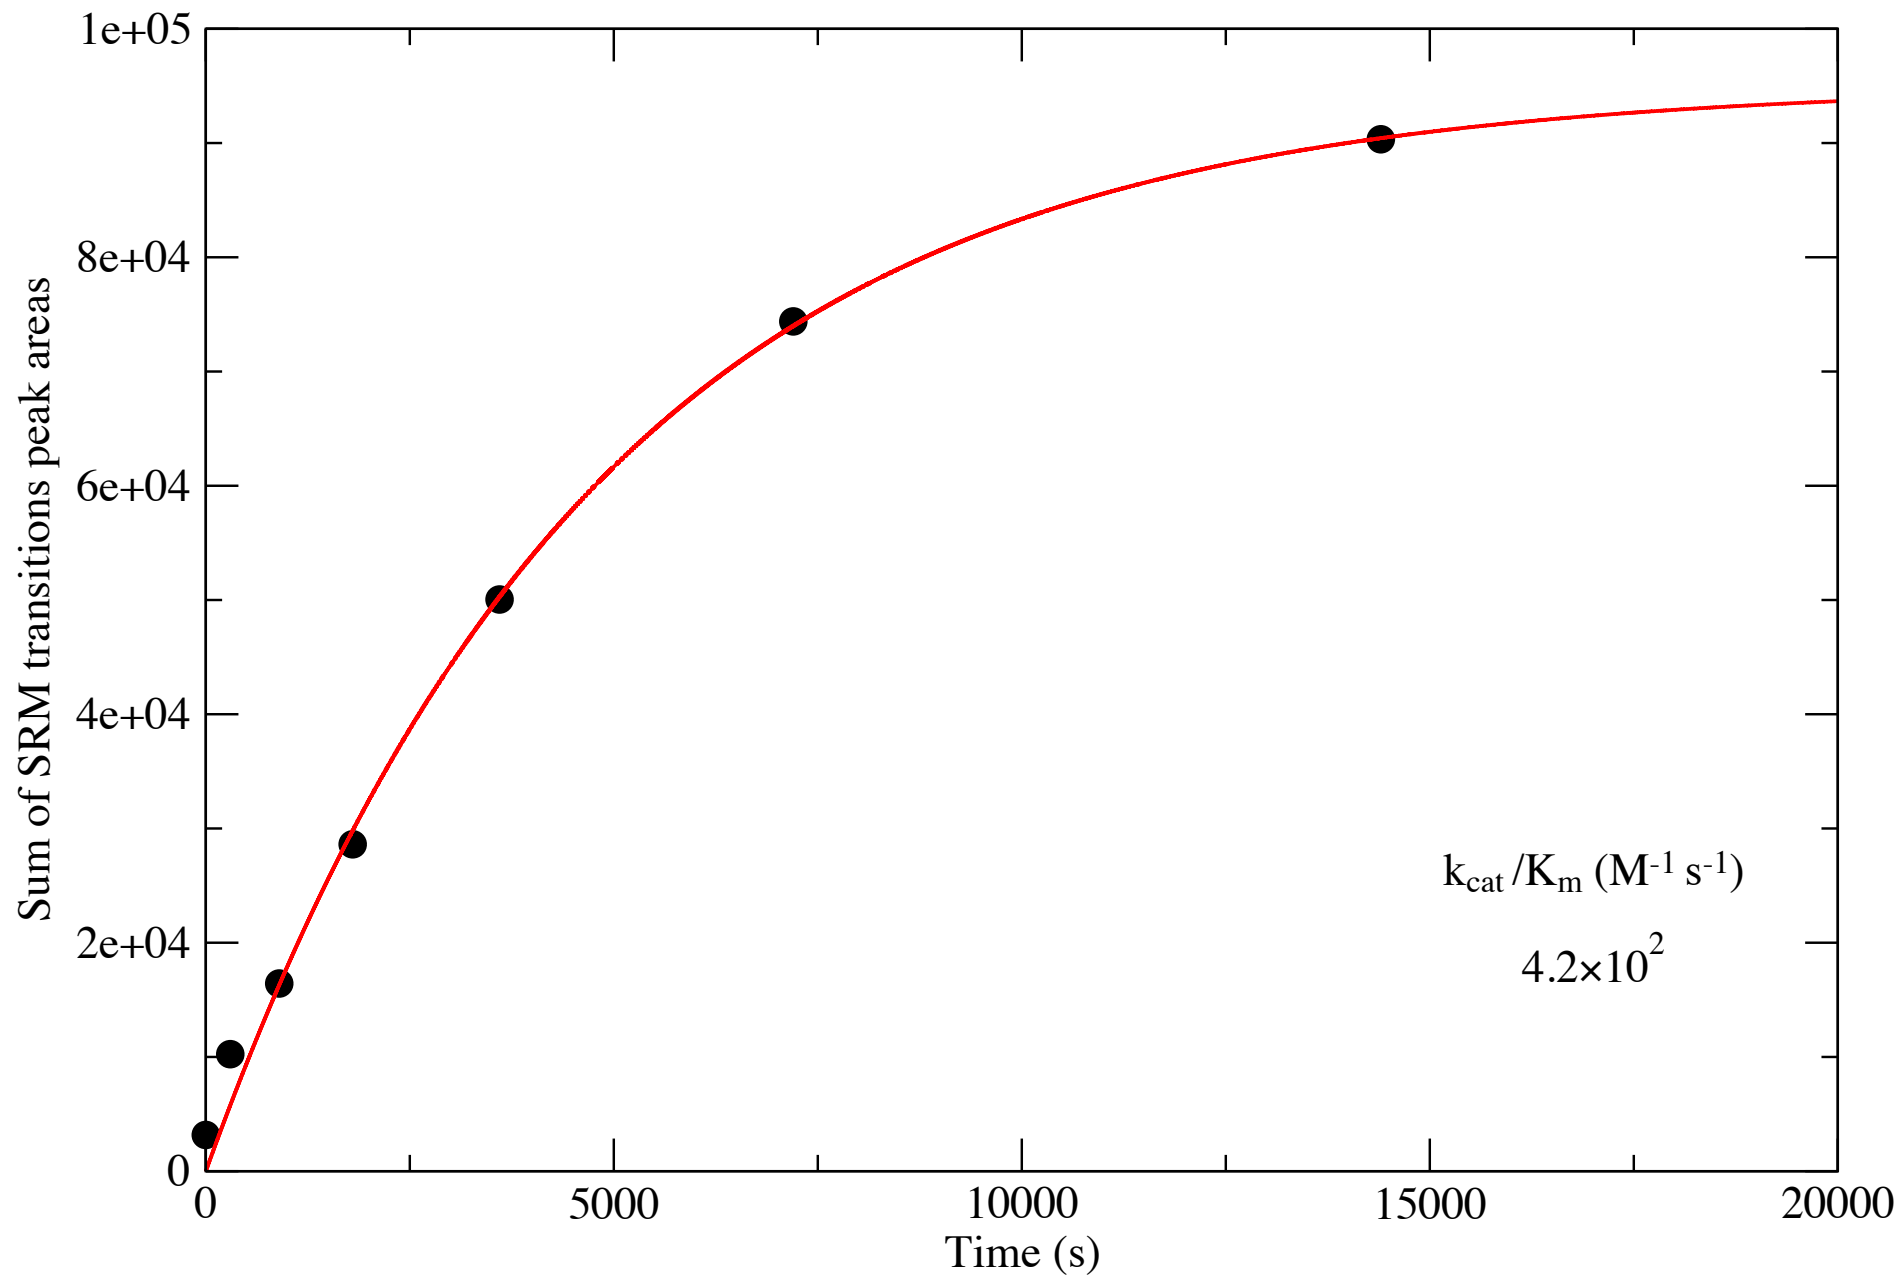



# HCLS1\_HUMAN (FVNDISEKEQR)

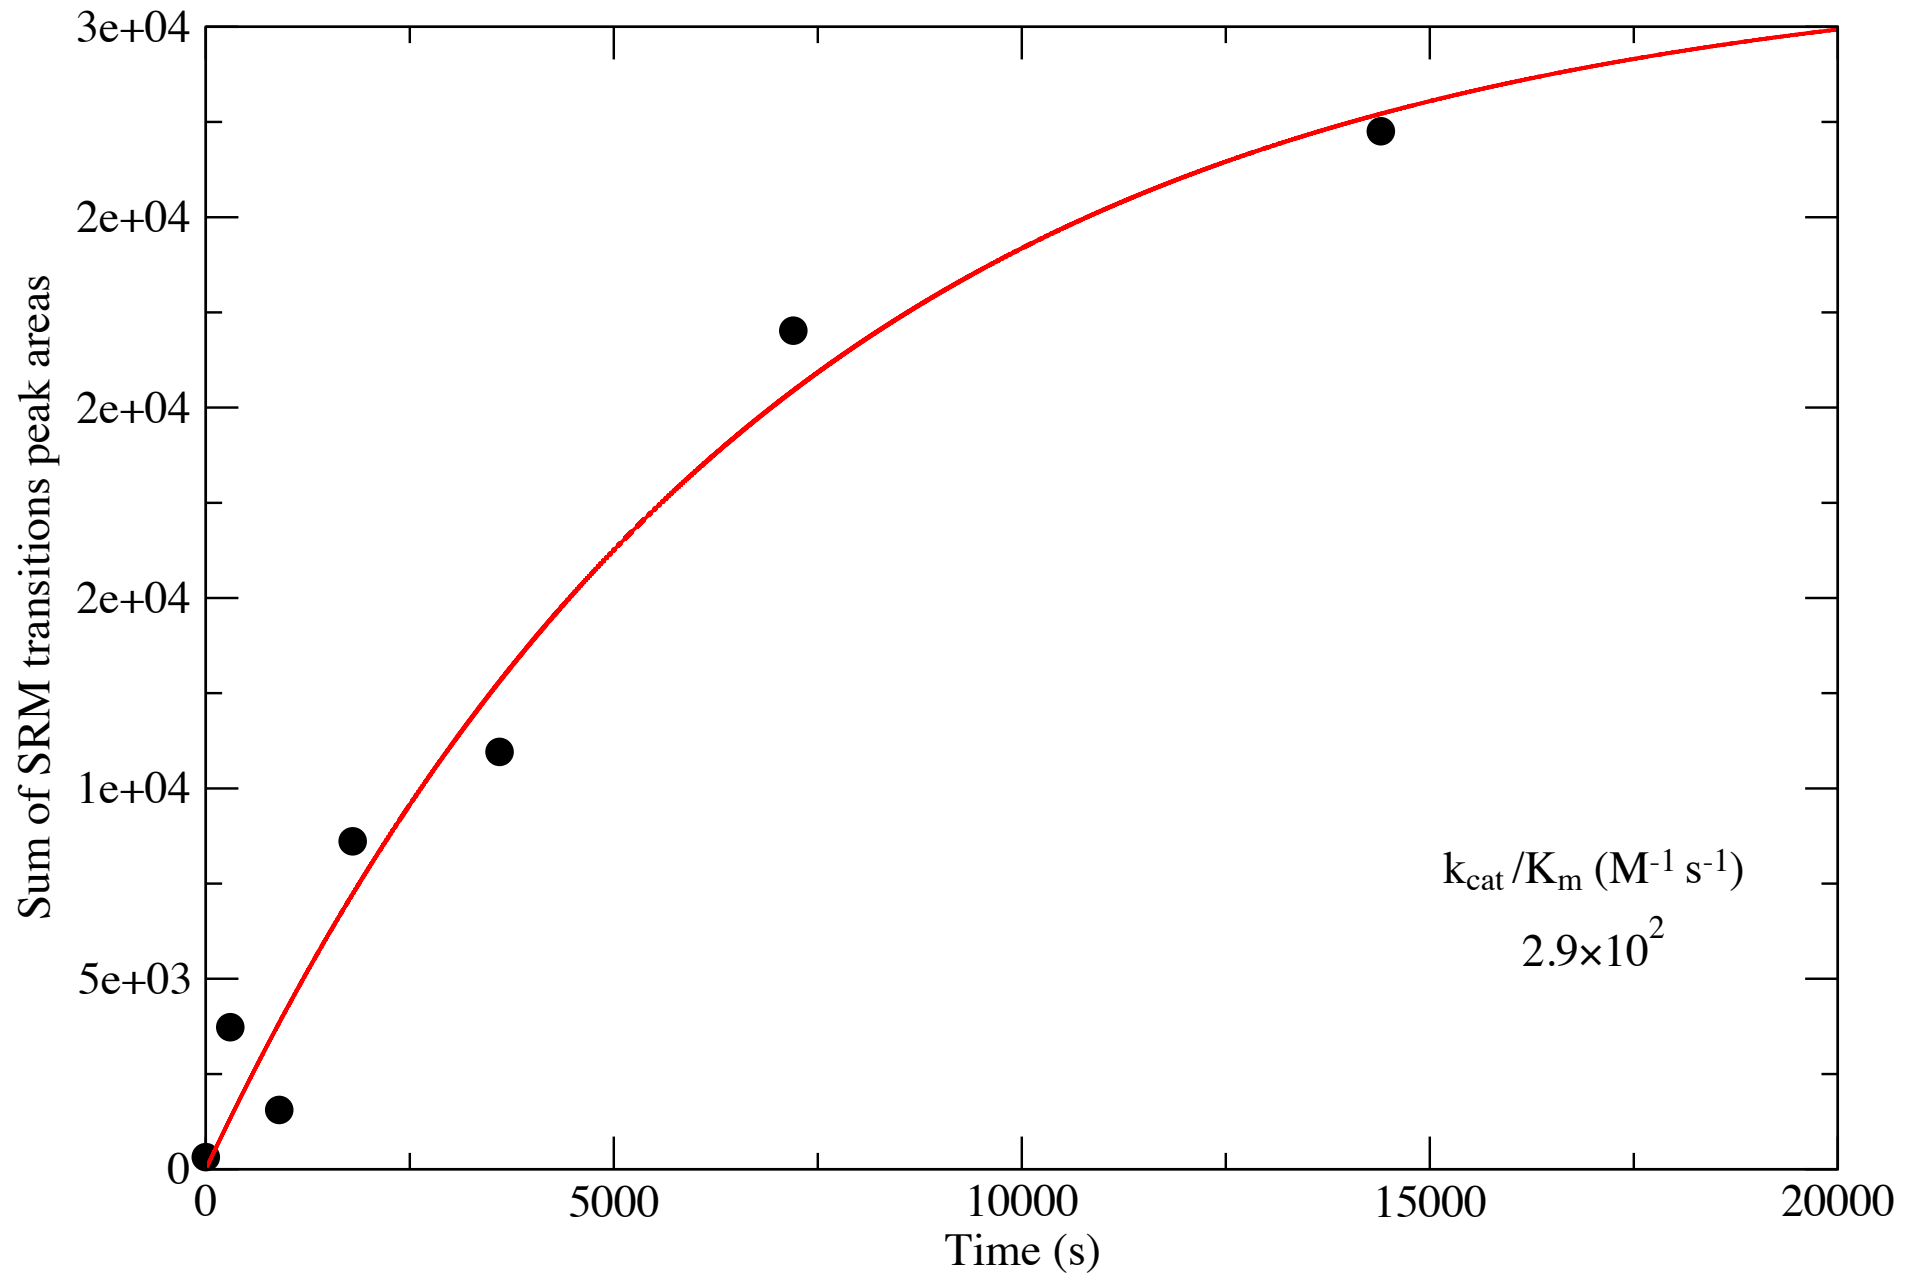

# HEXI1\_HUMAN (GMGGDGSEFLQR)

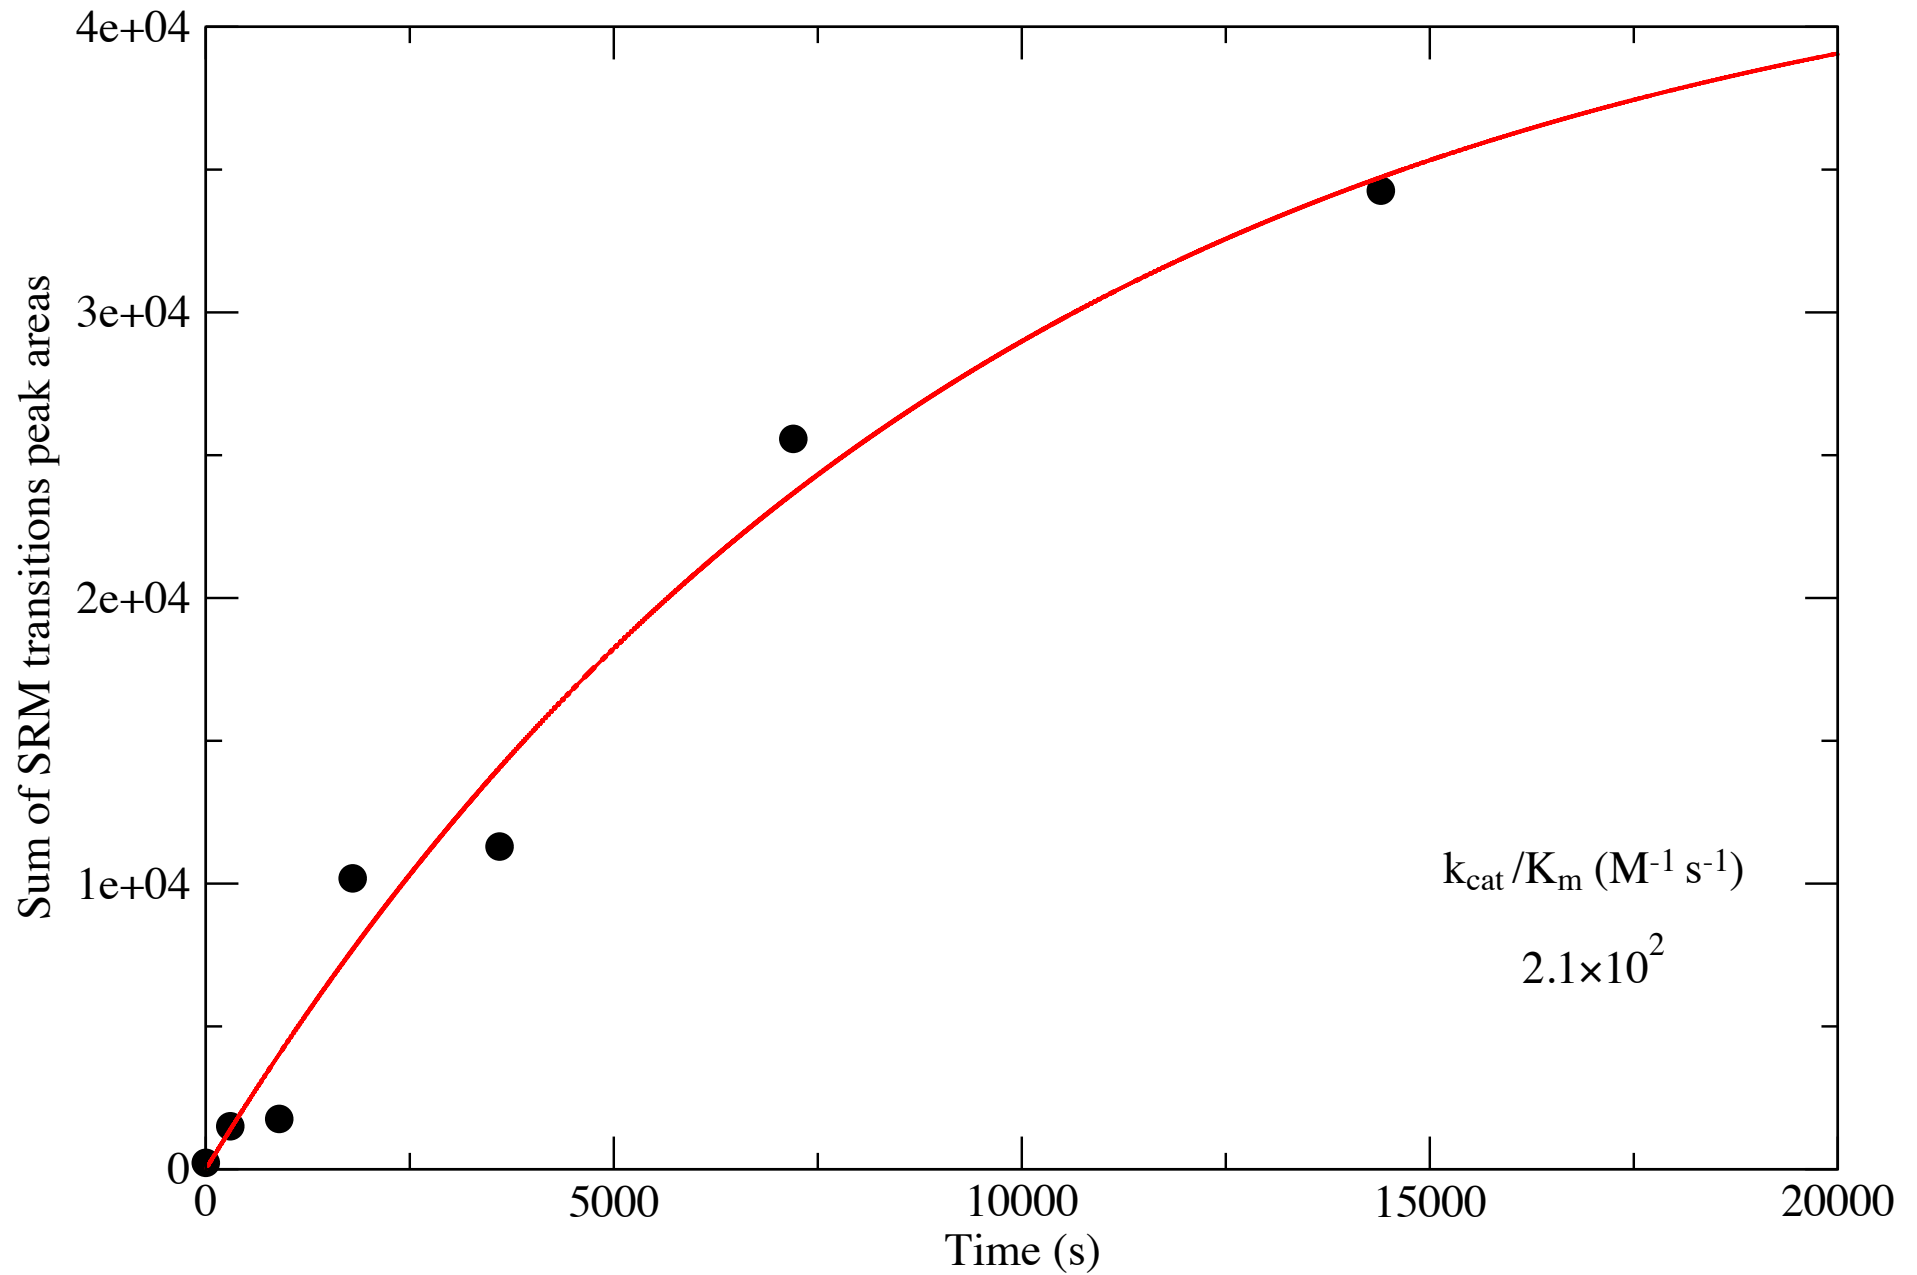

# HNRH1\_HUMAN (GYGFGSDR)

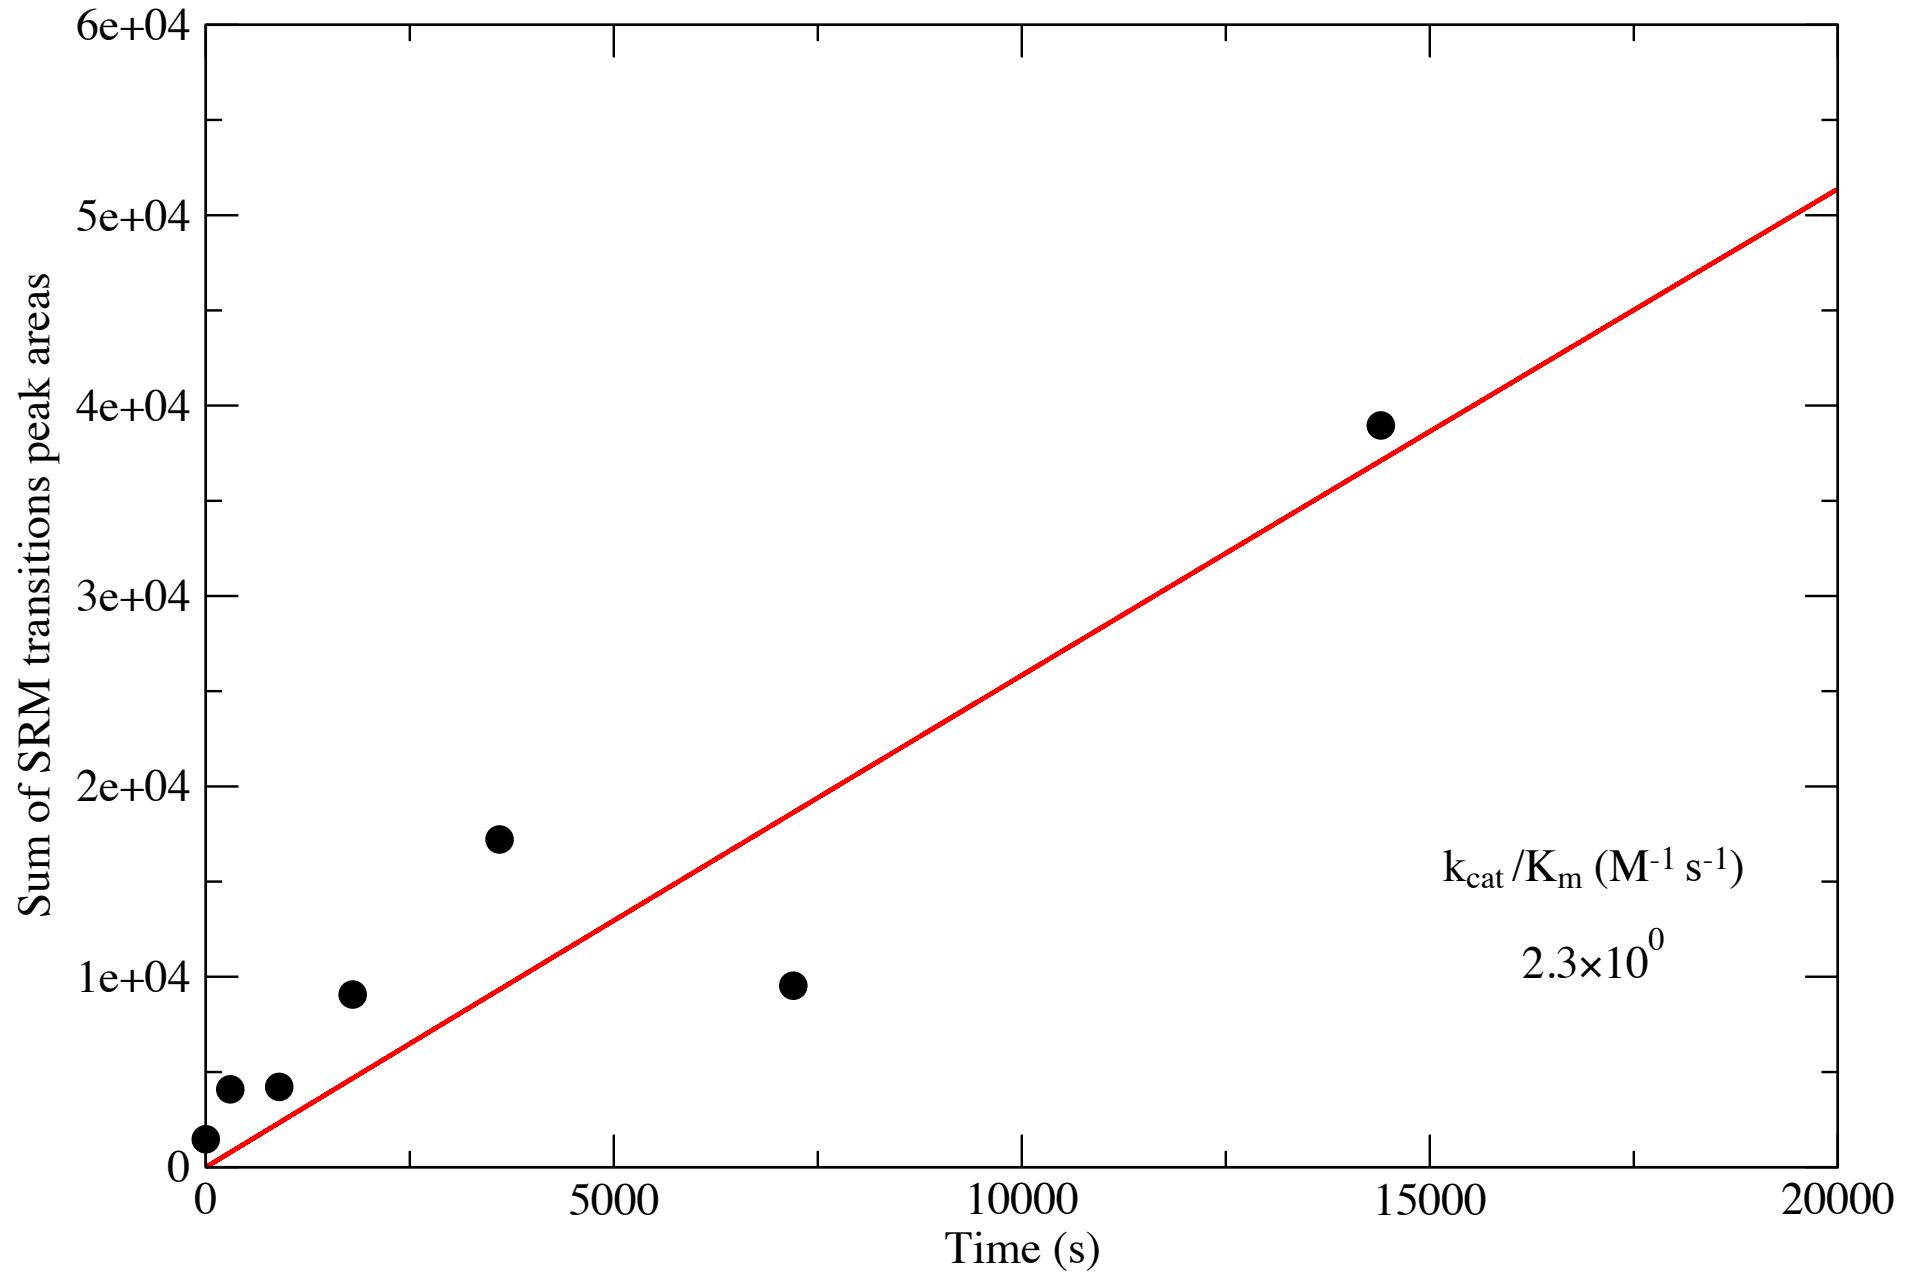

# HNRH1\_HUMAN (WVLKHTGPNSPDTANDGFVR)

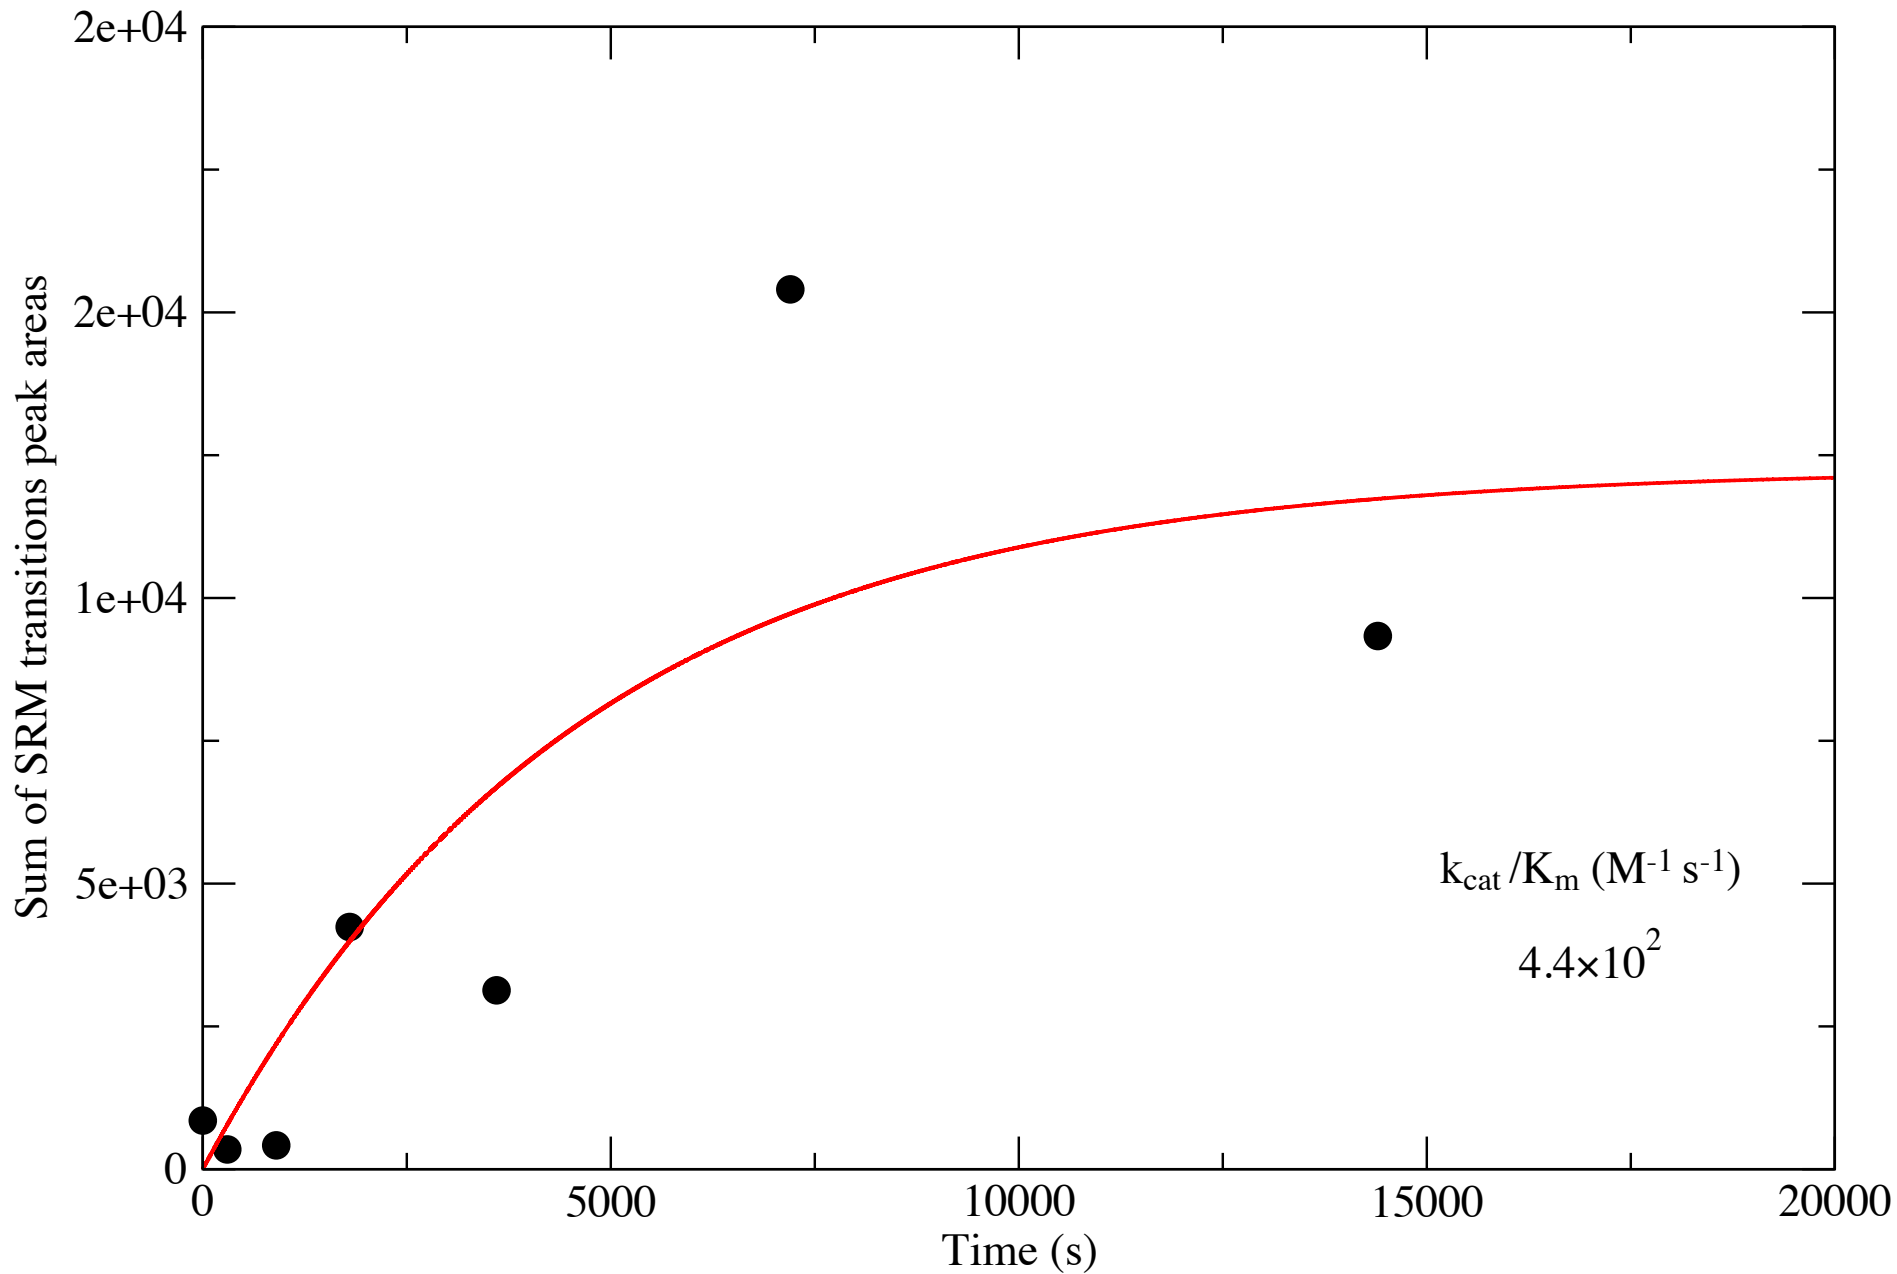

# HNRPF\_HUMAN (GYGFTTDLFGR)

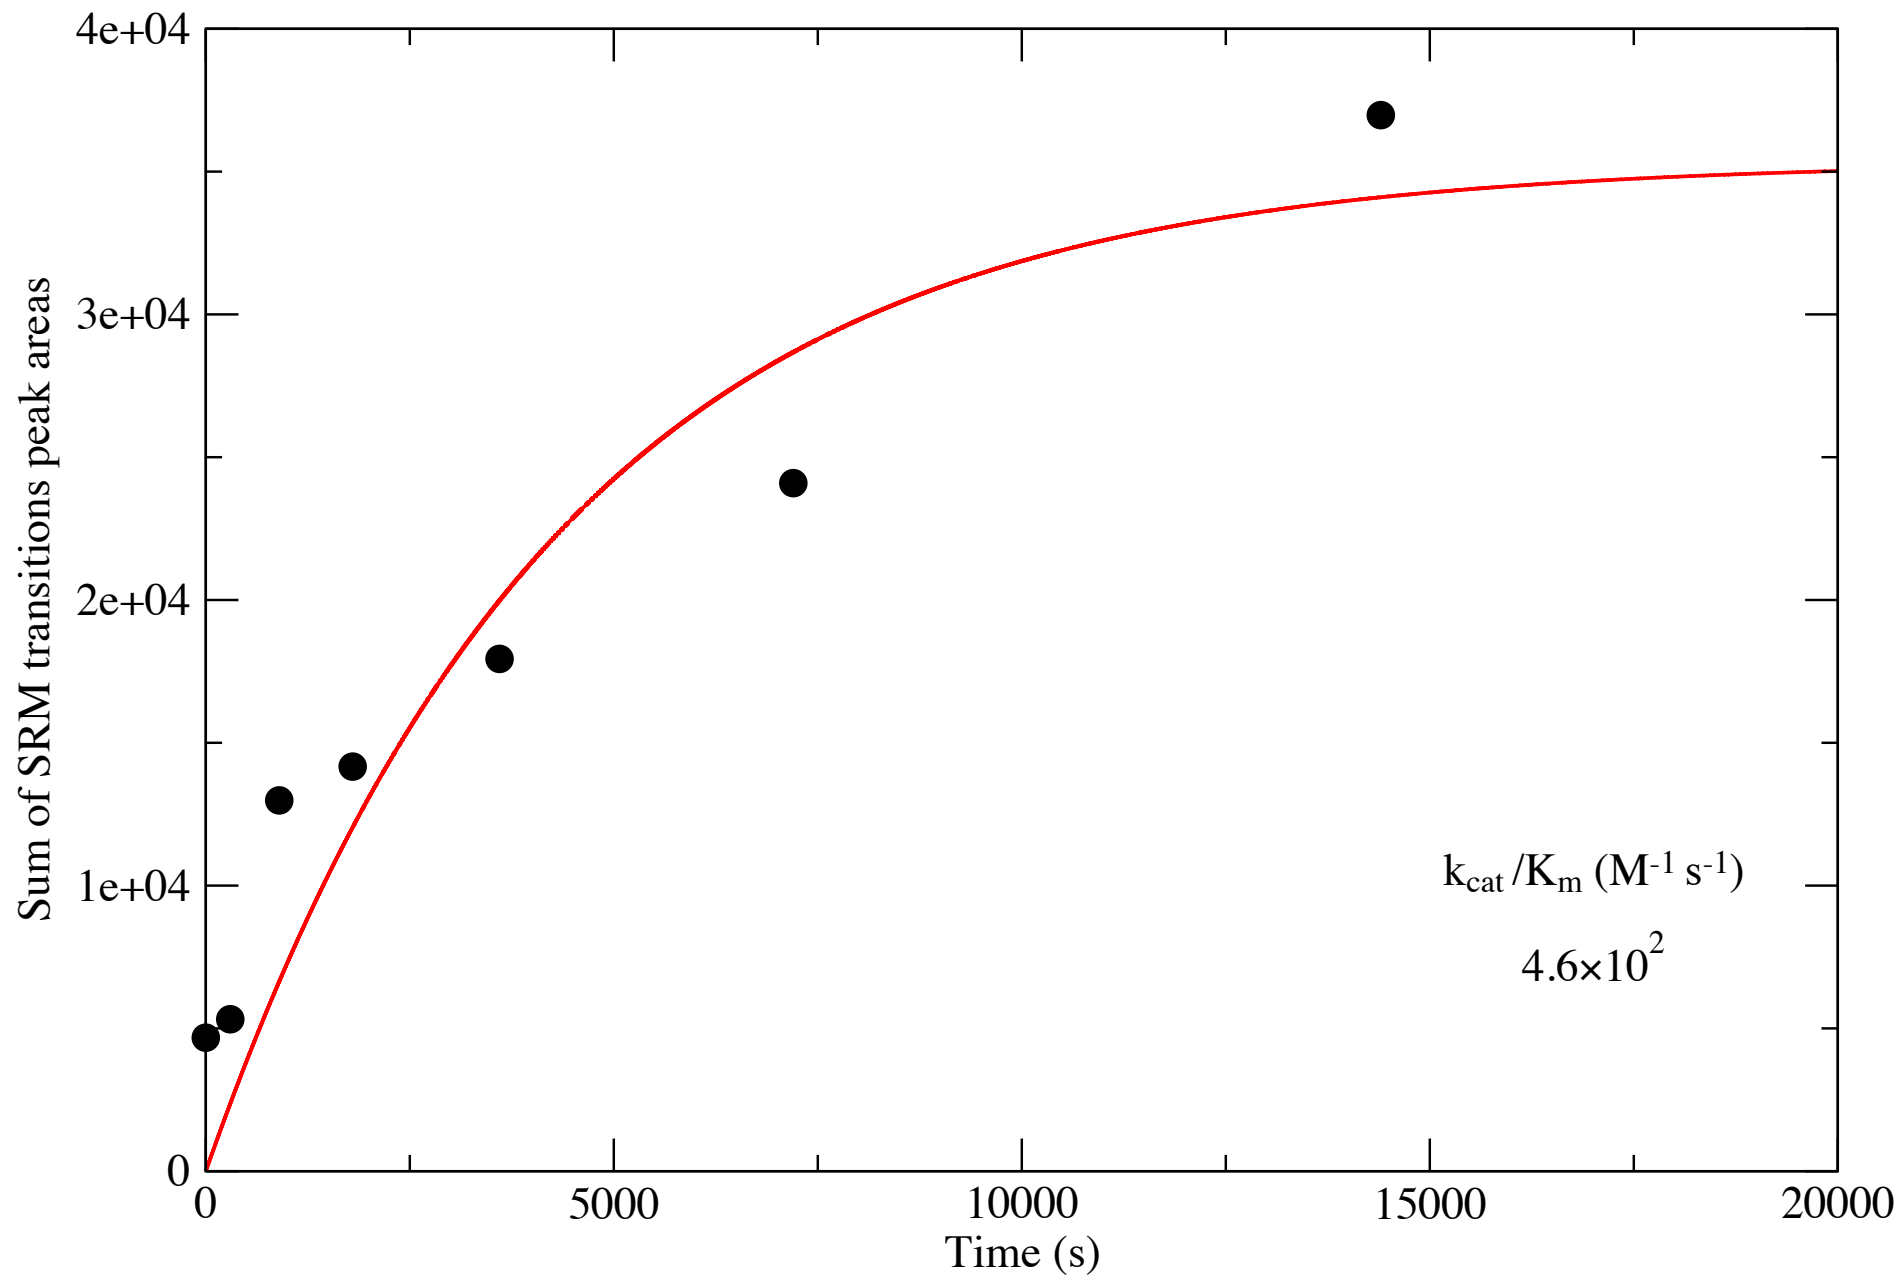

# HNRPK\_HUMAN (AVECLNYQHYK)

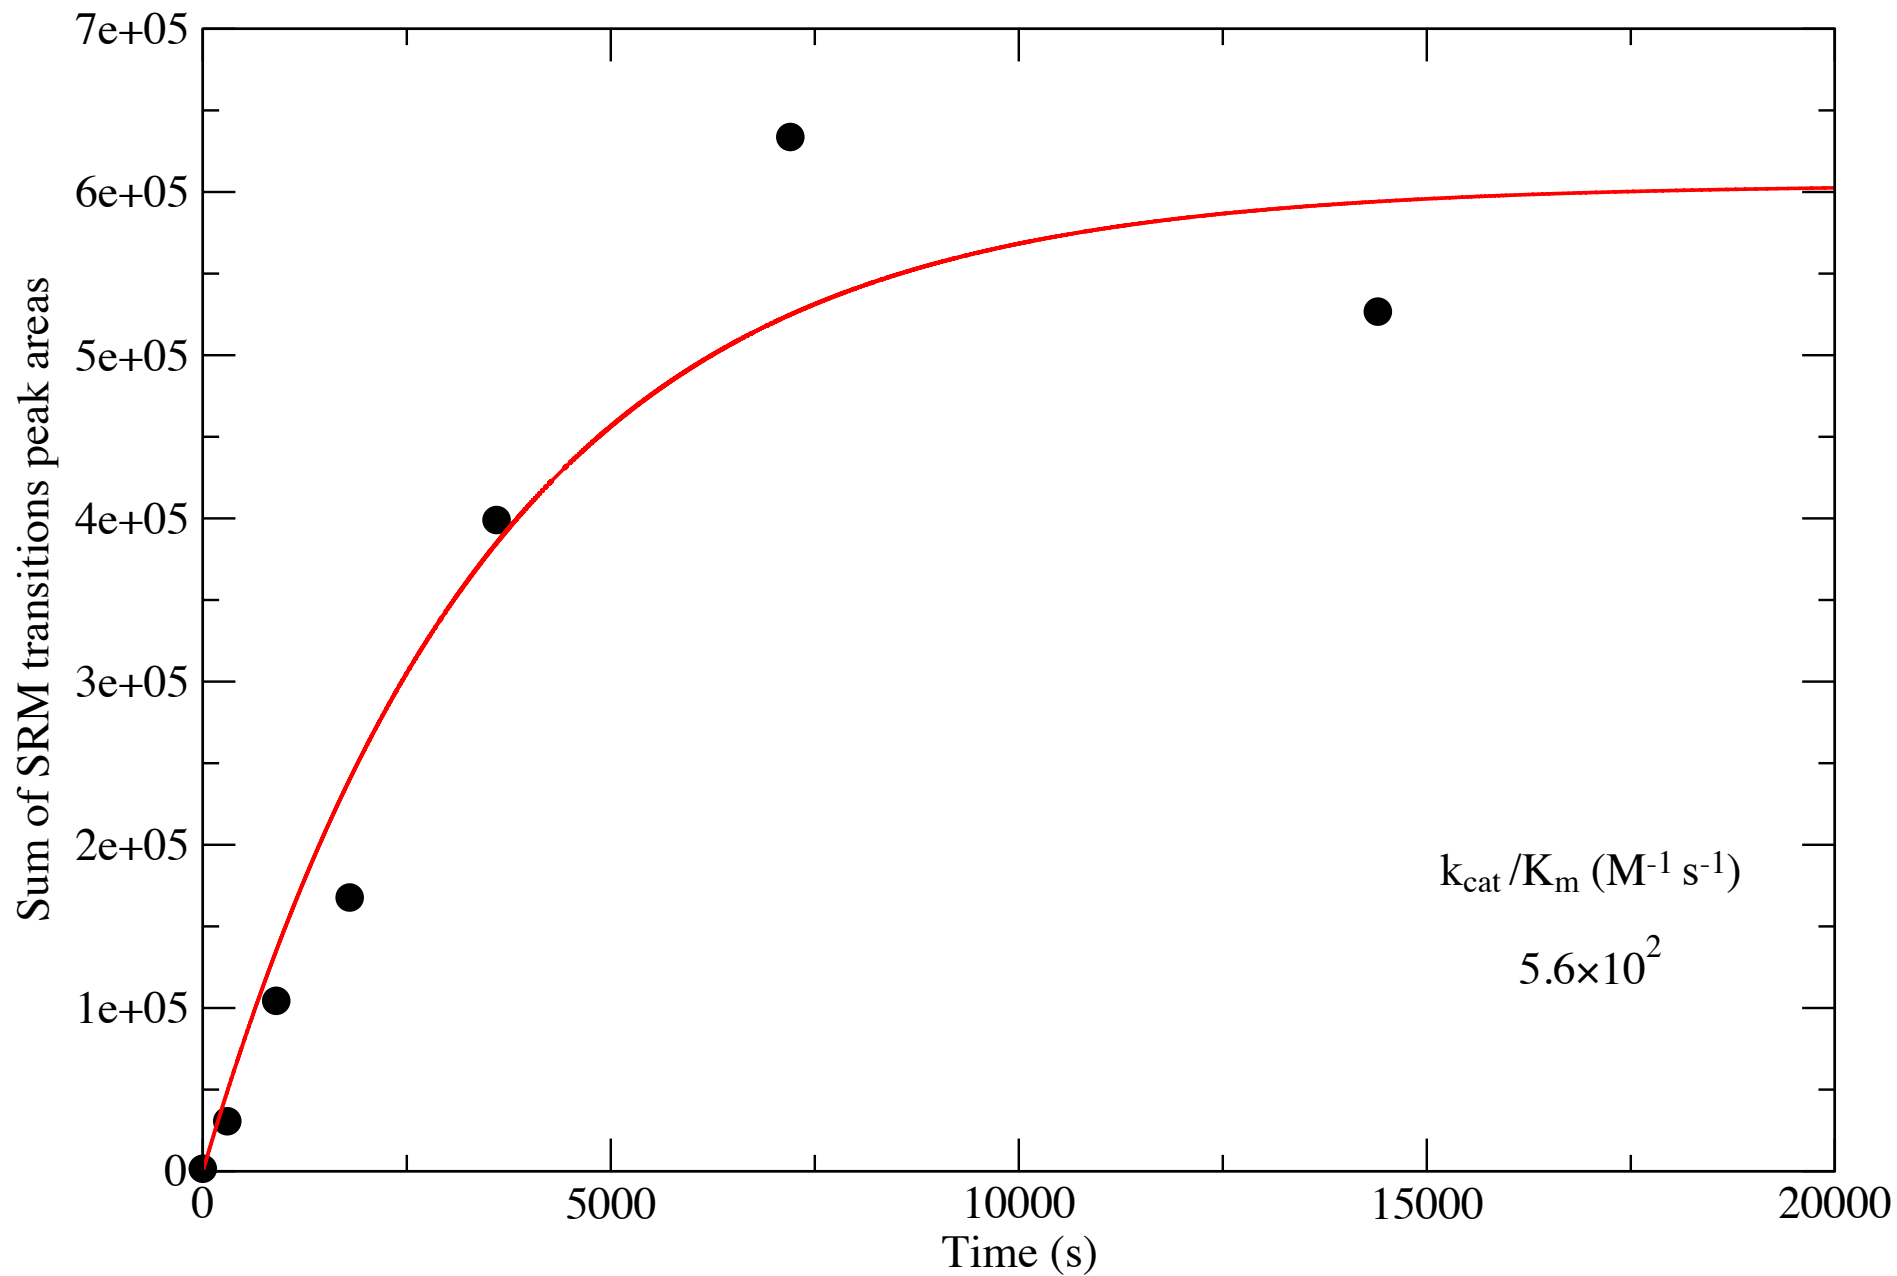

# HNRPK\_HUMAN (SAIDTWSPEWQMA YEPQGGSGYDYSYAGGR)

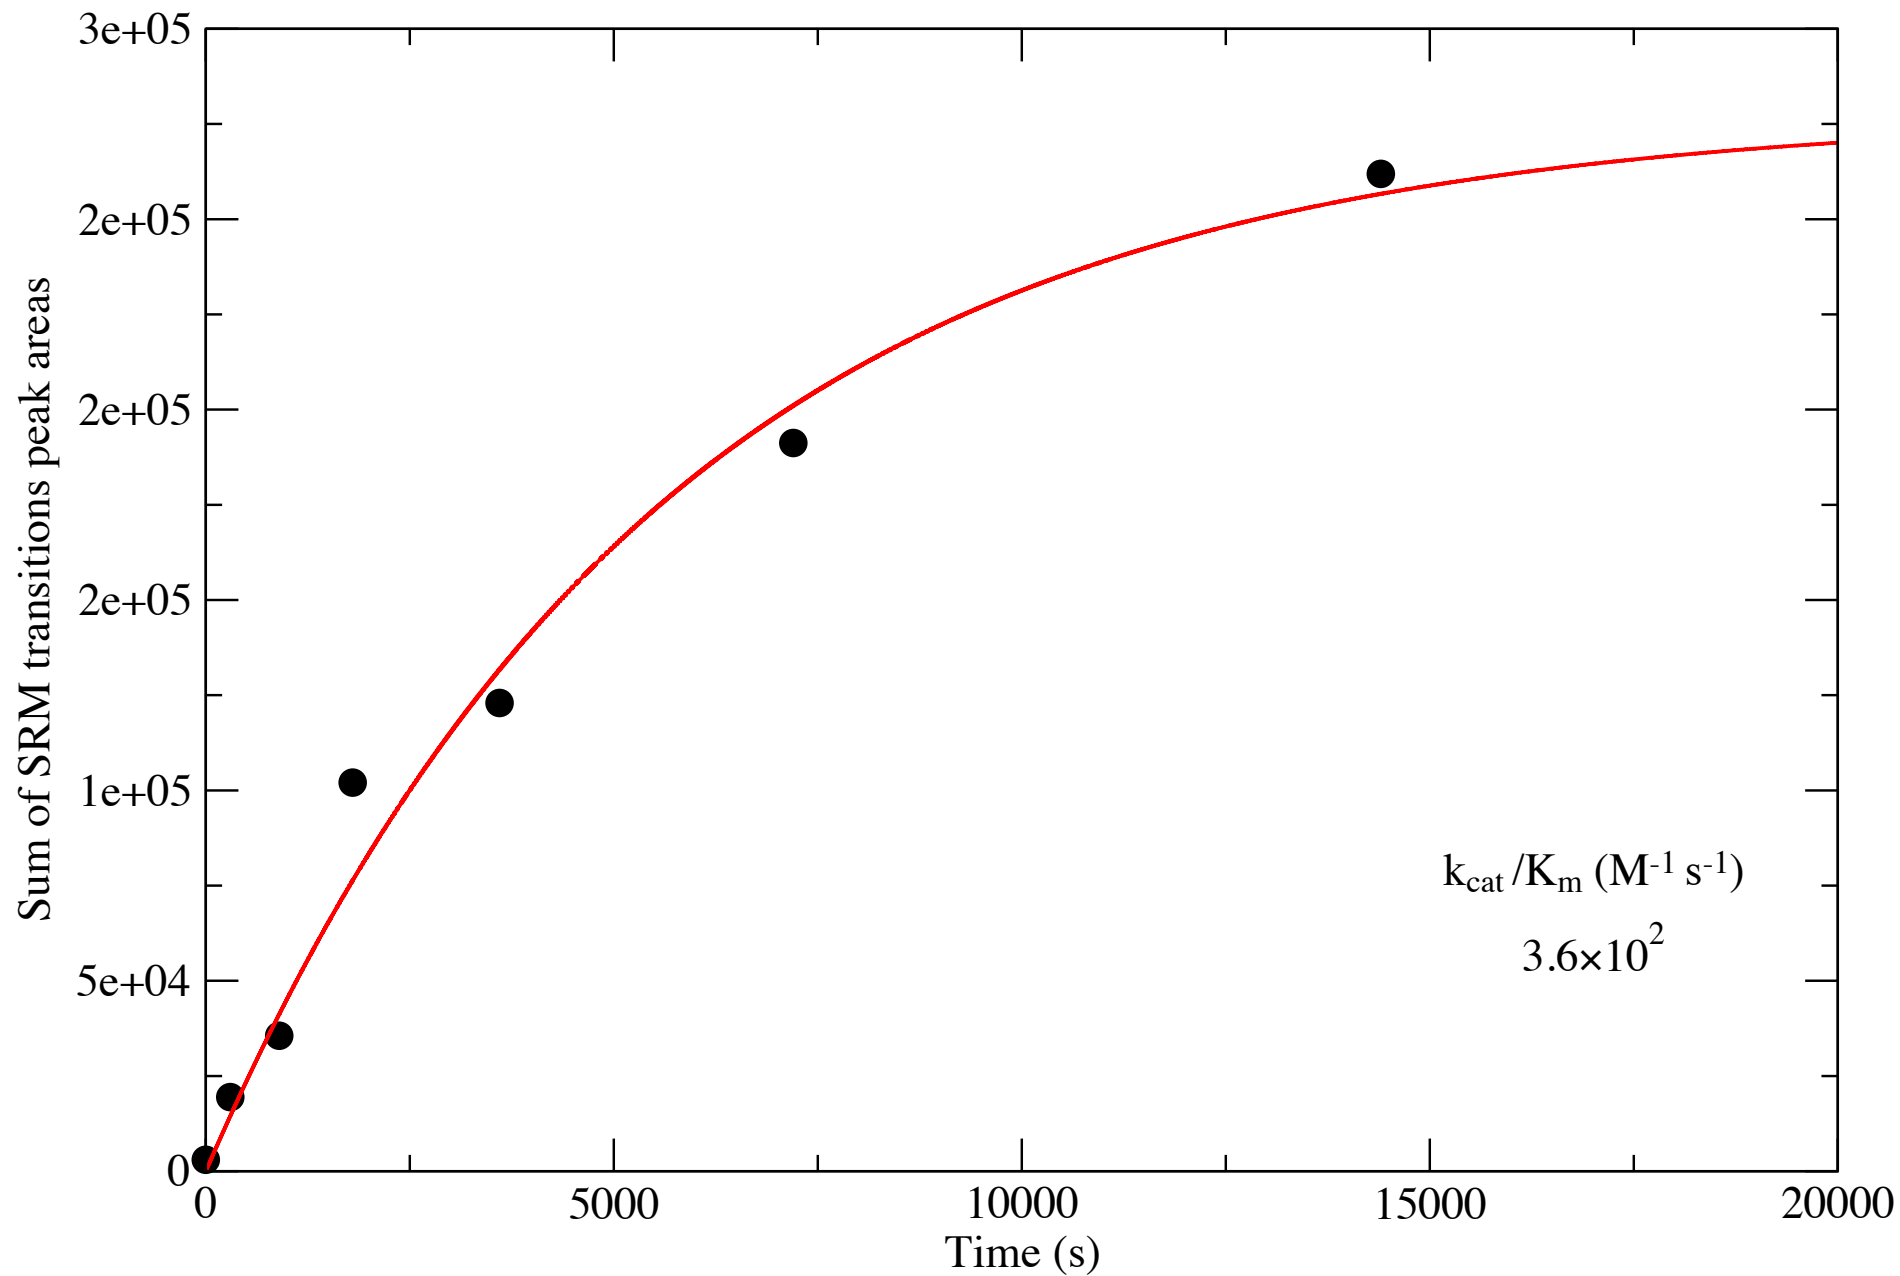

# HNRPK\_HUMAN (TWSPSEWQMA YEPQGGSGYDYSYAGGR)

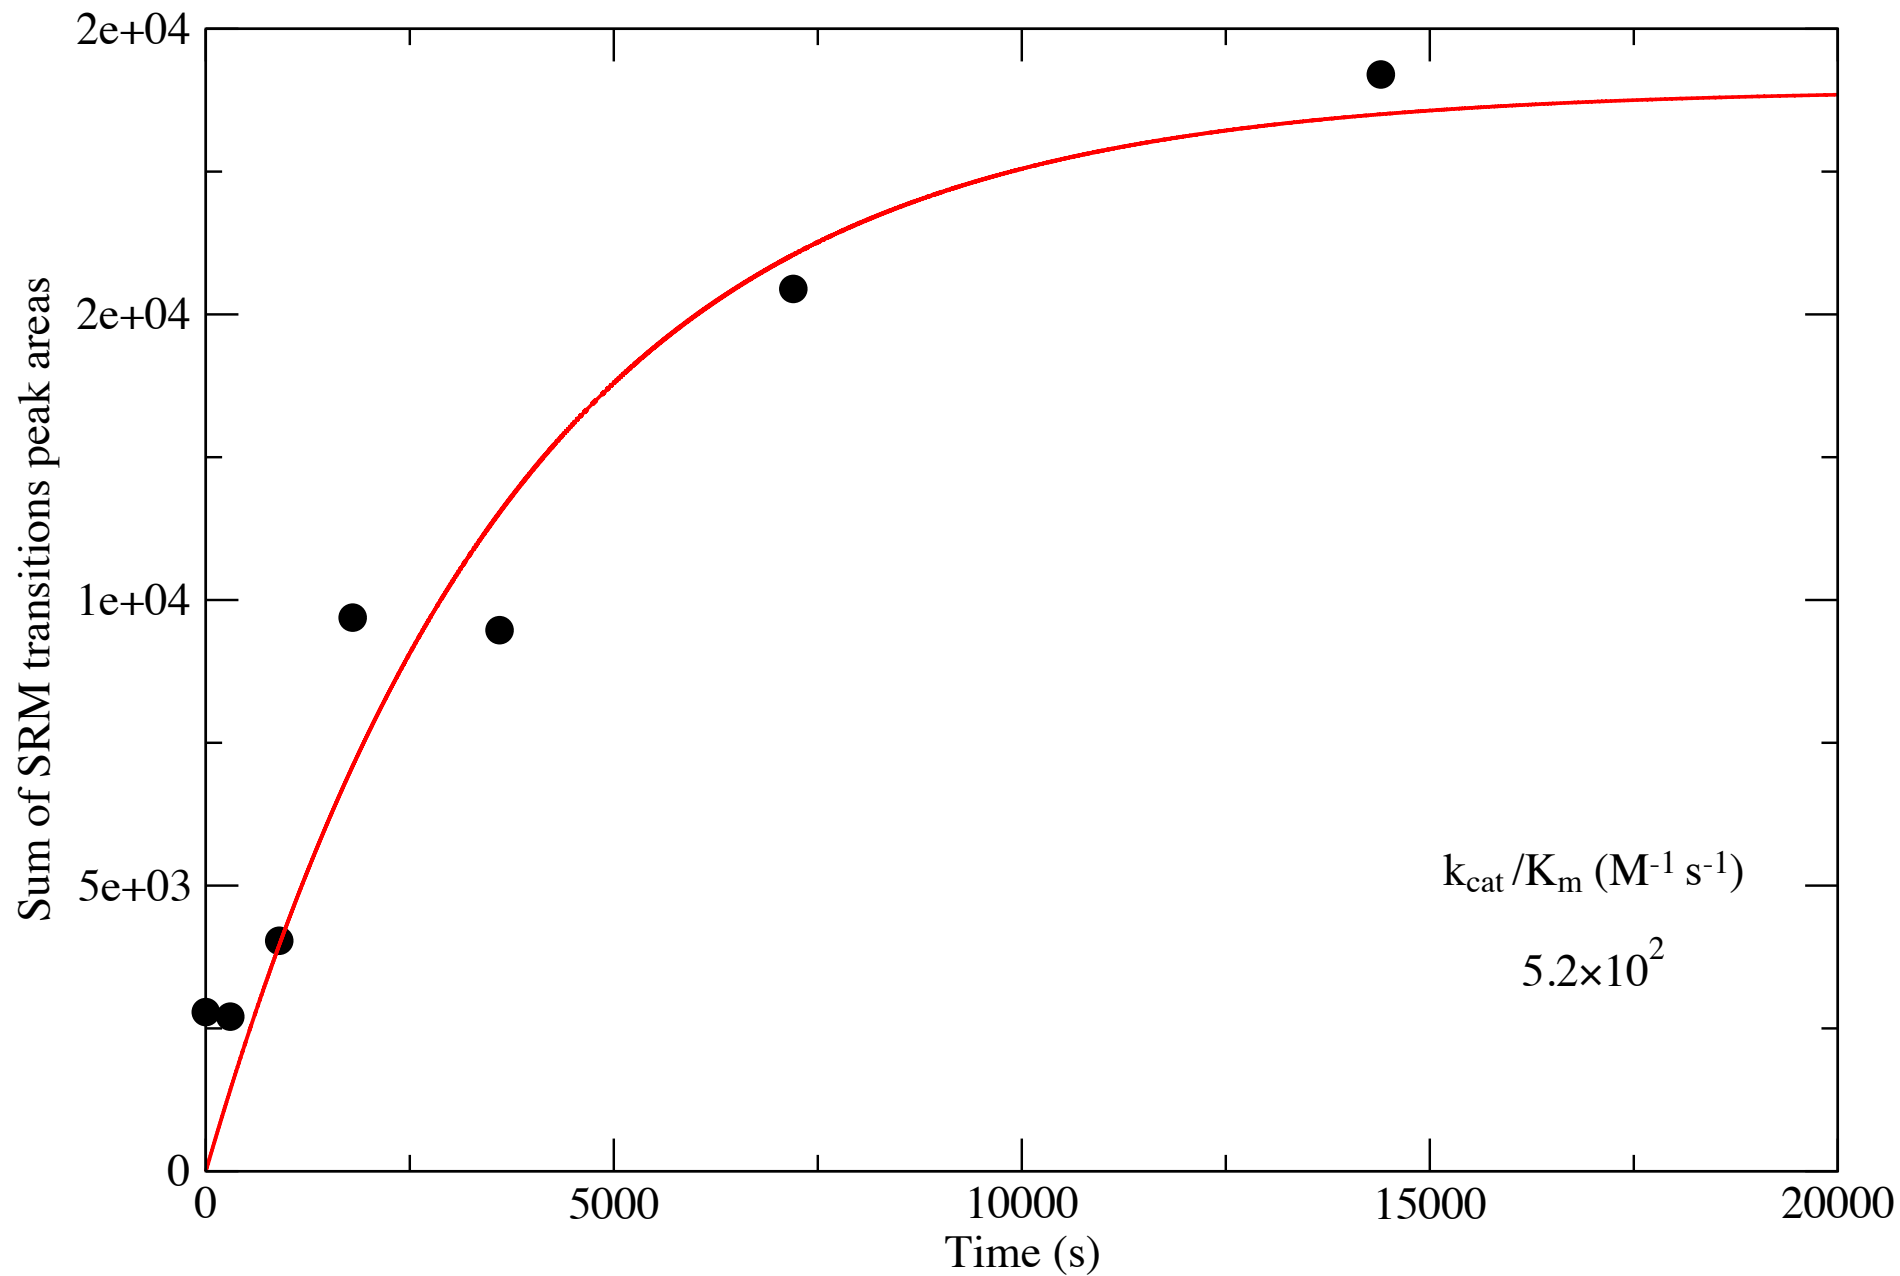



# HPS4\_HUMAN (GVCESHAAPGLECSSSGSANCQGAGPSADGISSR)

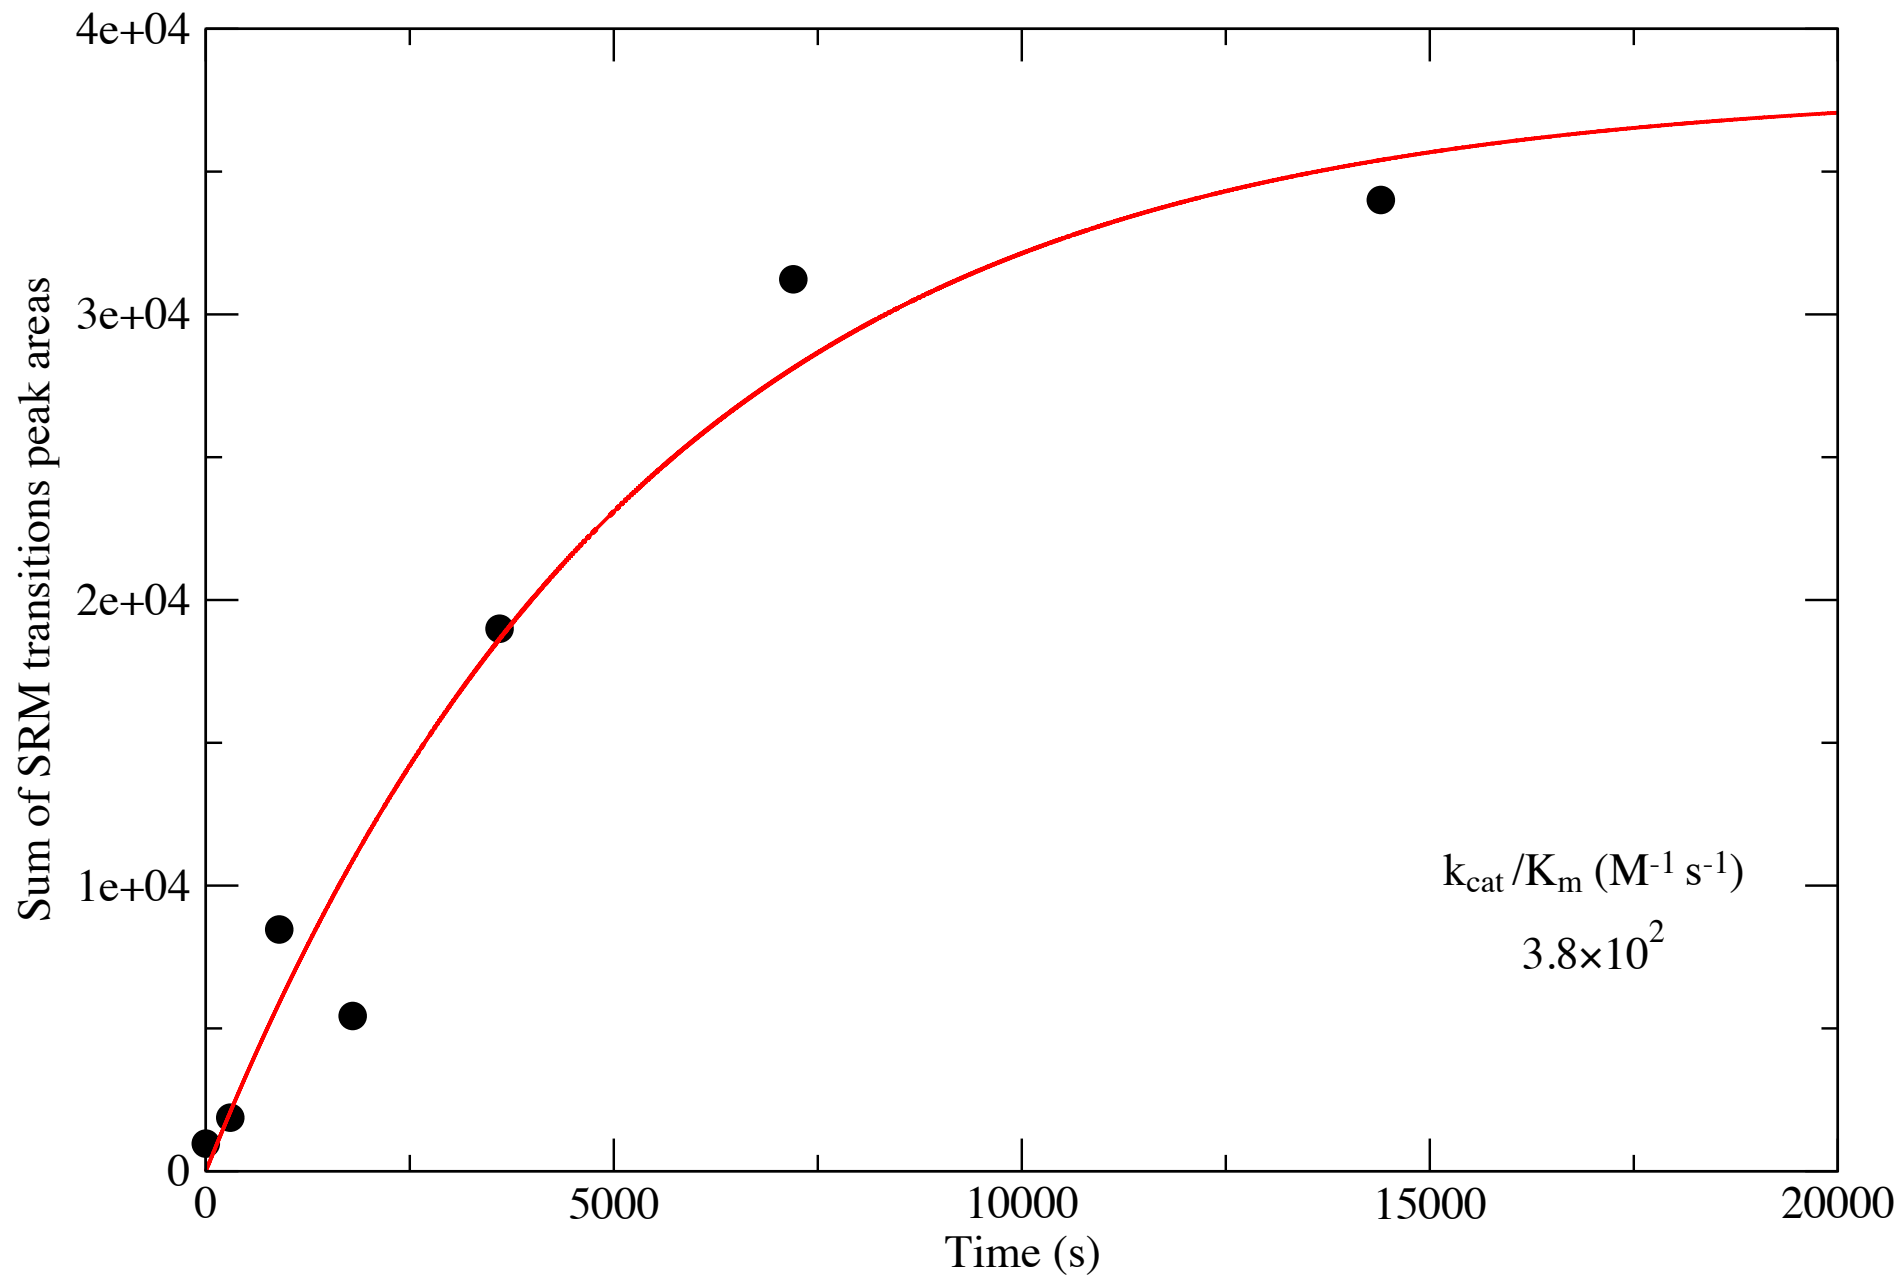

# HS105\_HUMAN (AQQTSQSPPSPELTSEENKIPDADKANEK)

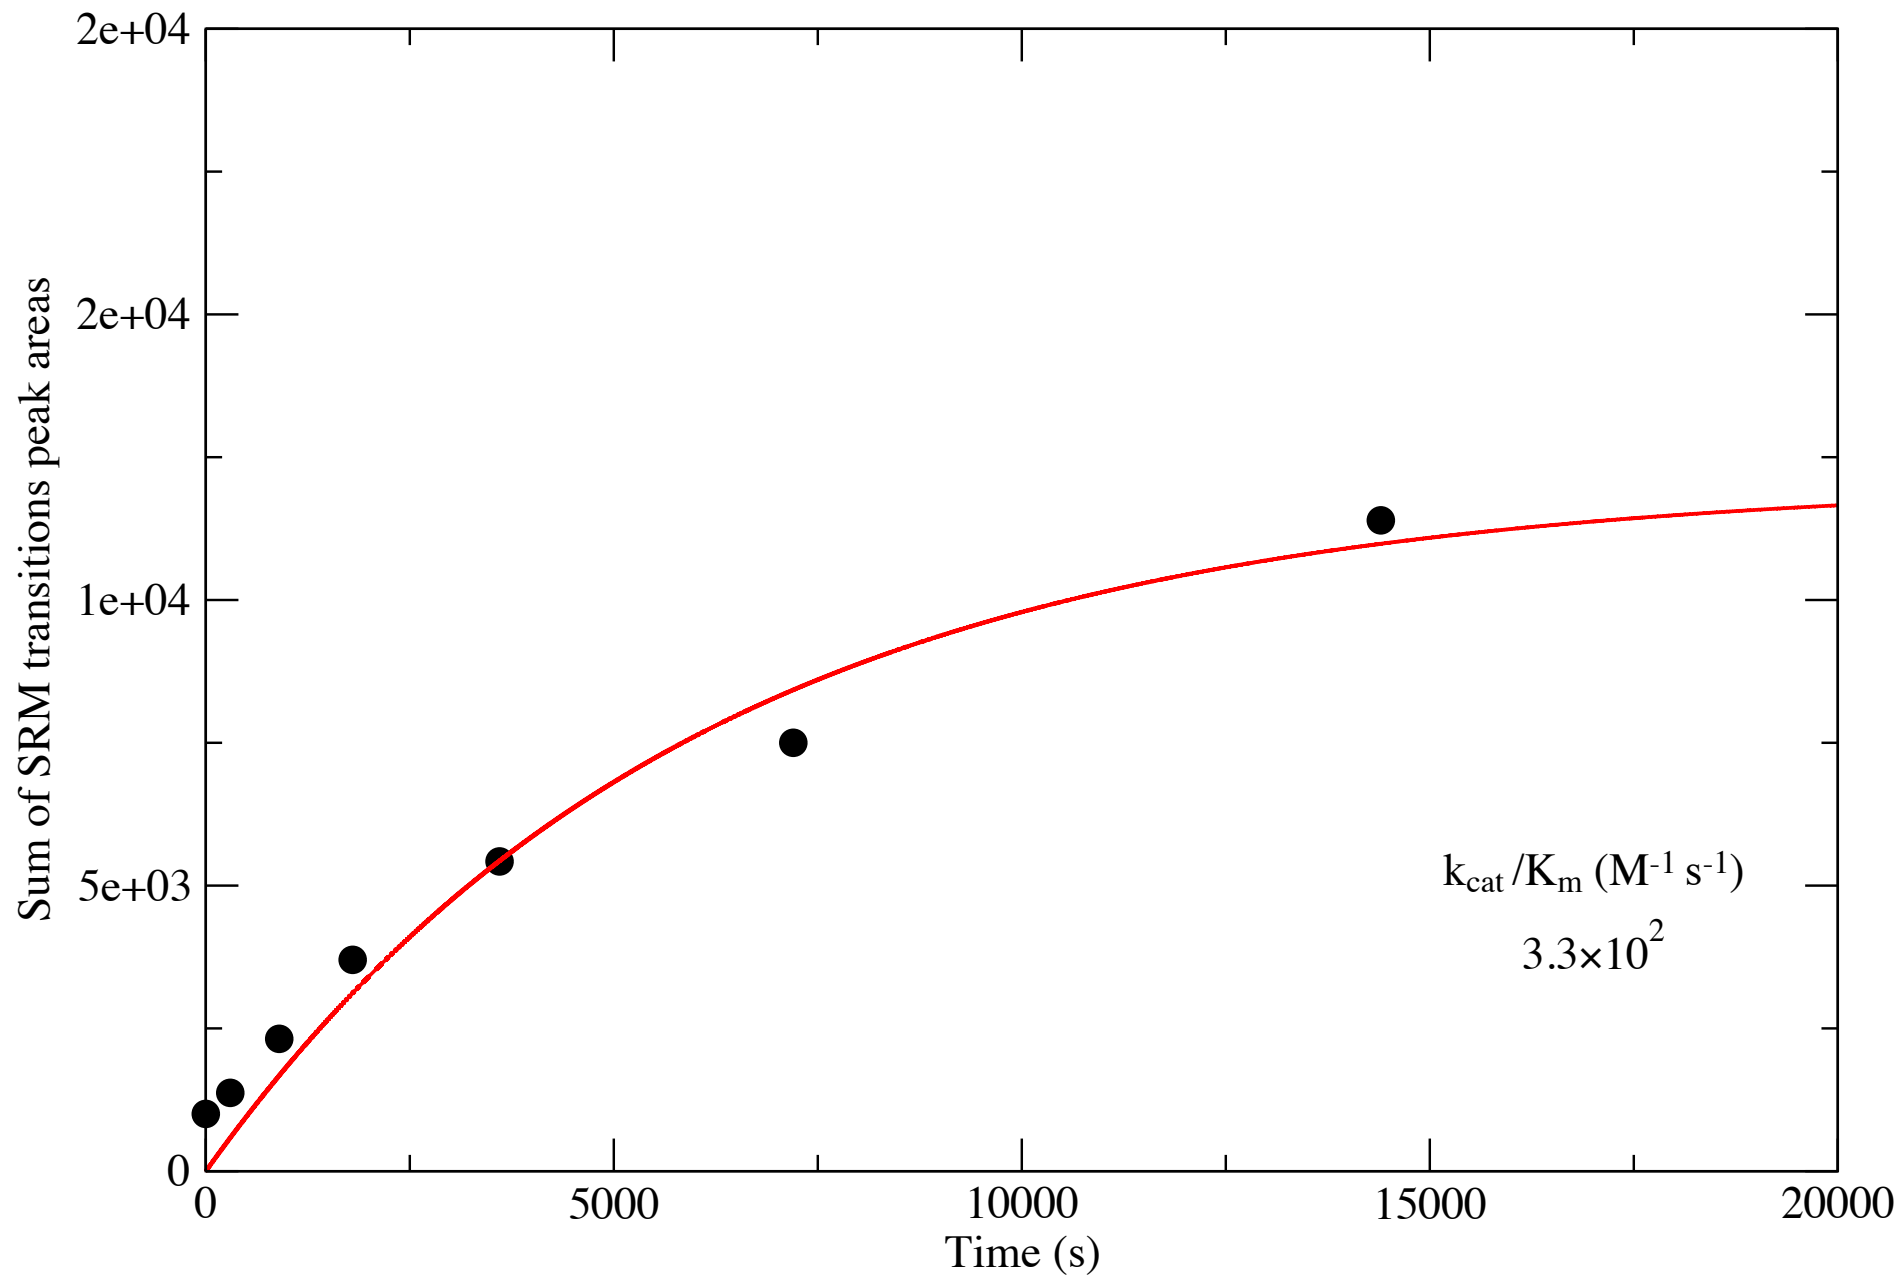

# HTSF1\_HUMAN (AGGEPDSLGGQQPTDTPYEWDLDKK)

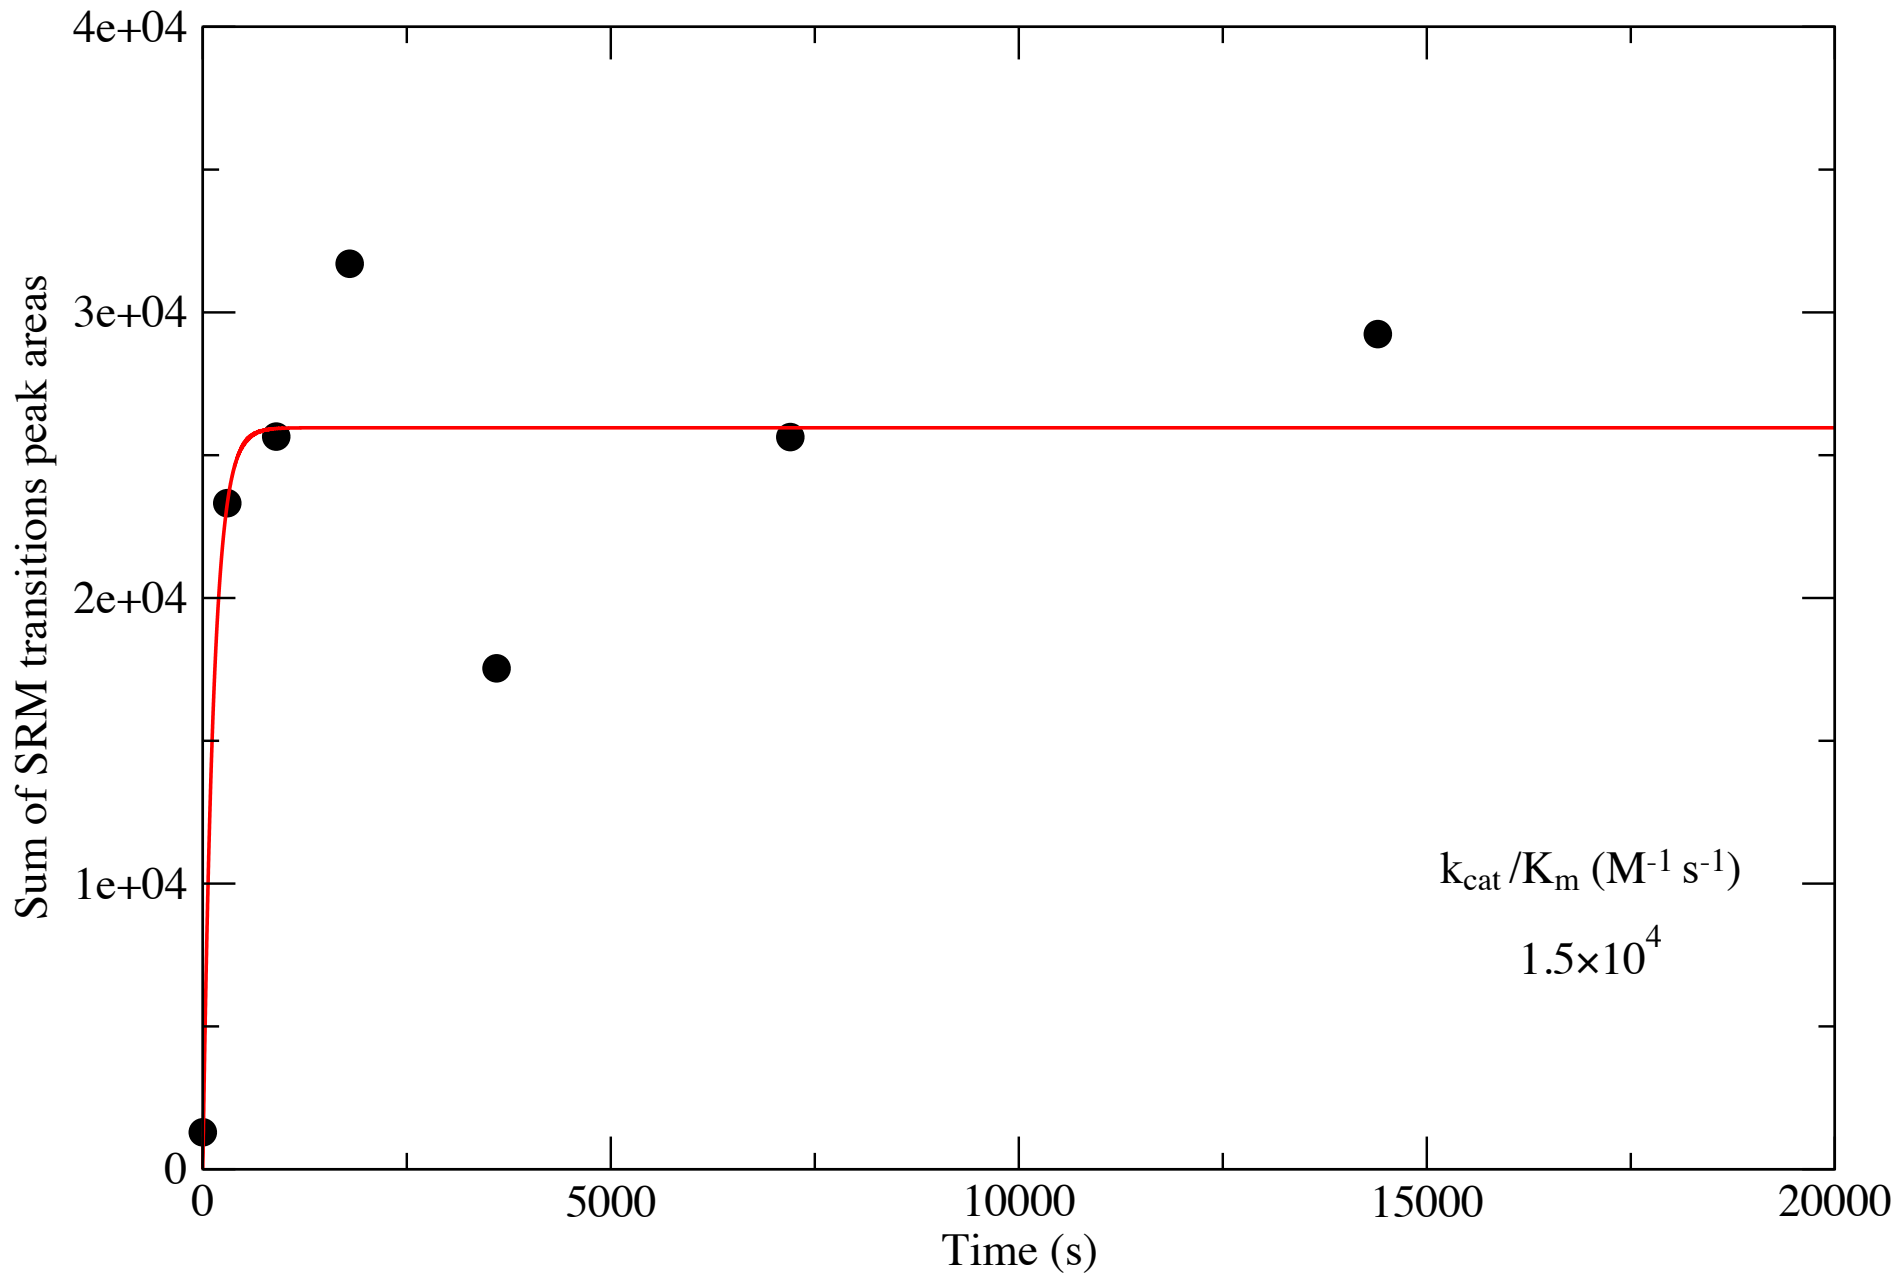

# HUWE1\_HUMAN (AIIQMVR)

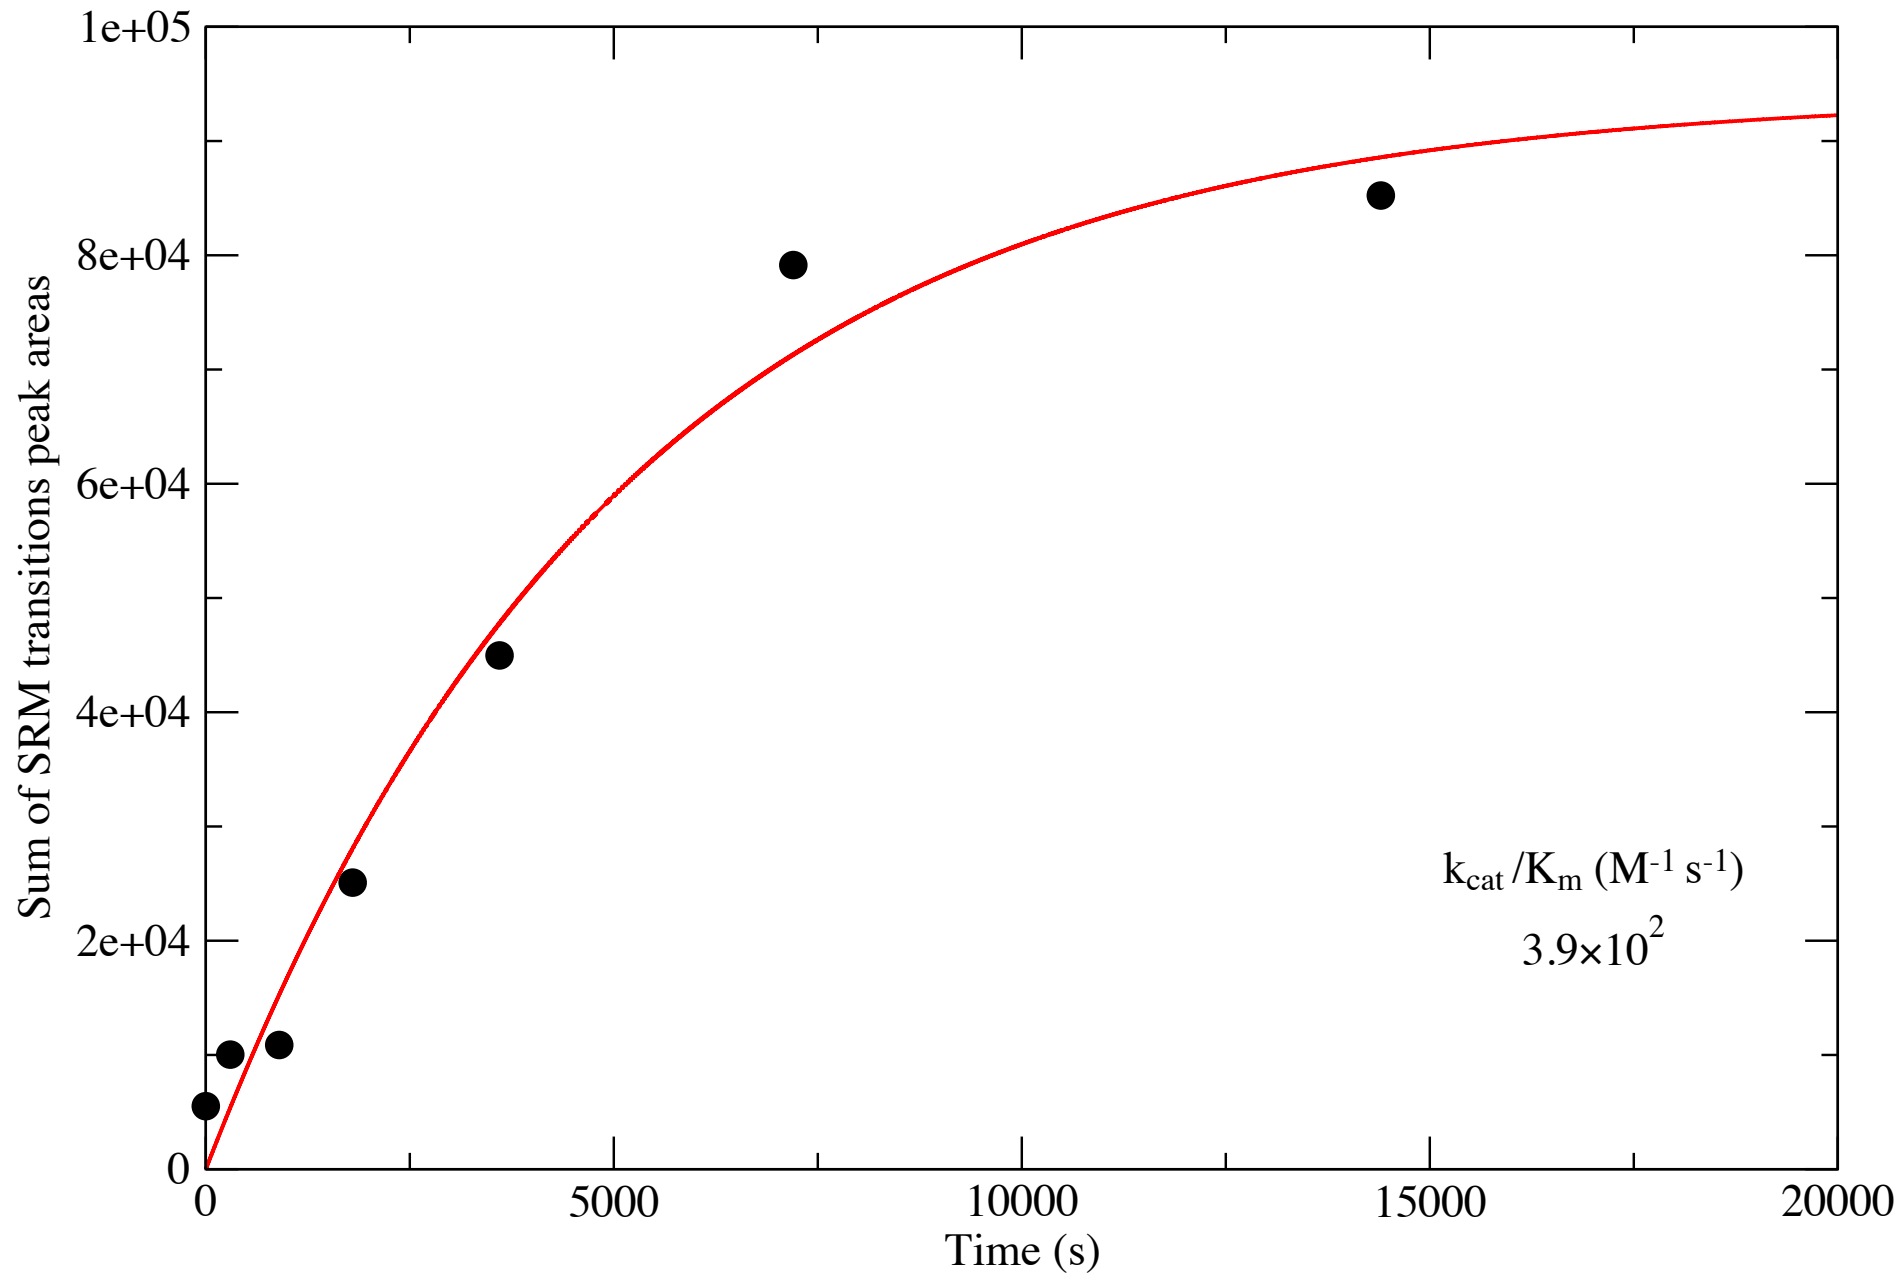

# HUWE1\_HUMAN (GGSGNSTIIVSR)

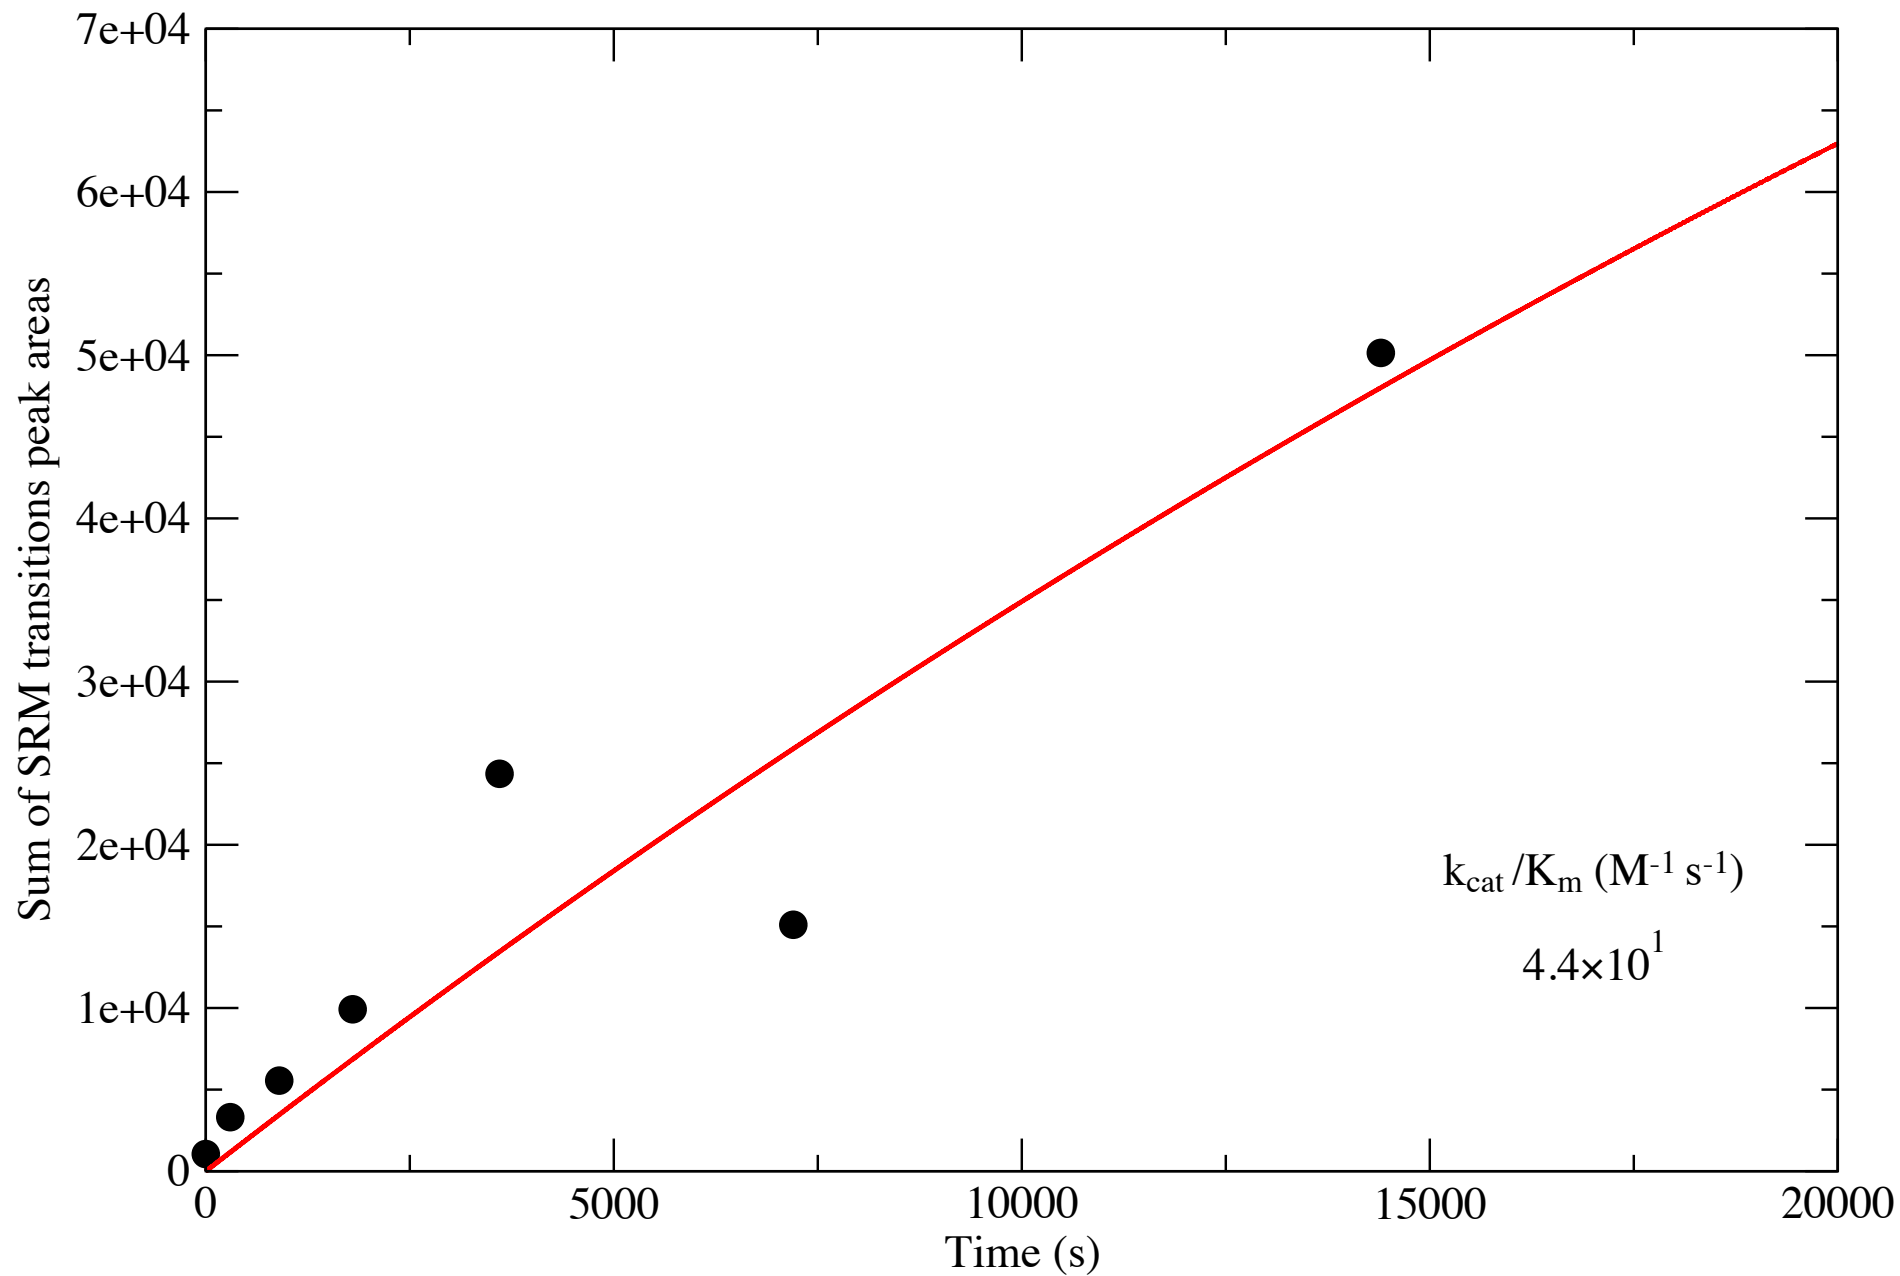

# IASPP\_HUMAN (GLGGTGKDNLTSLPR)

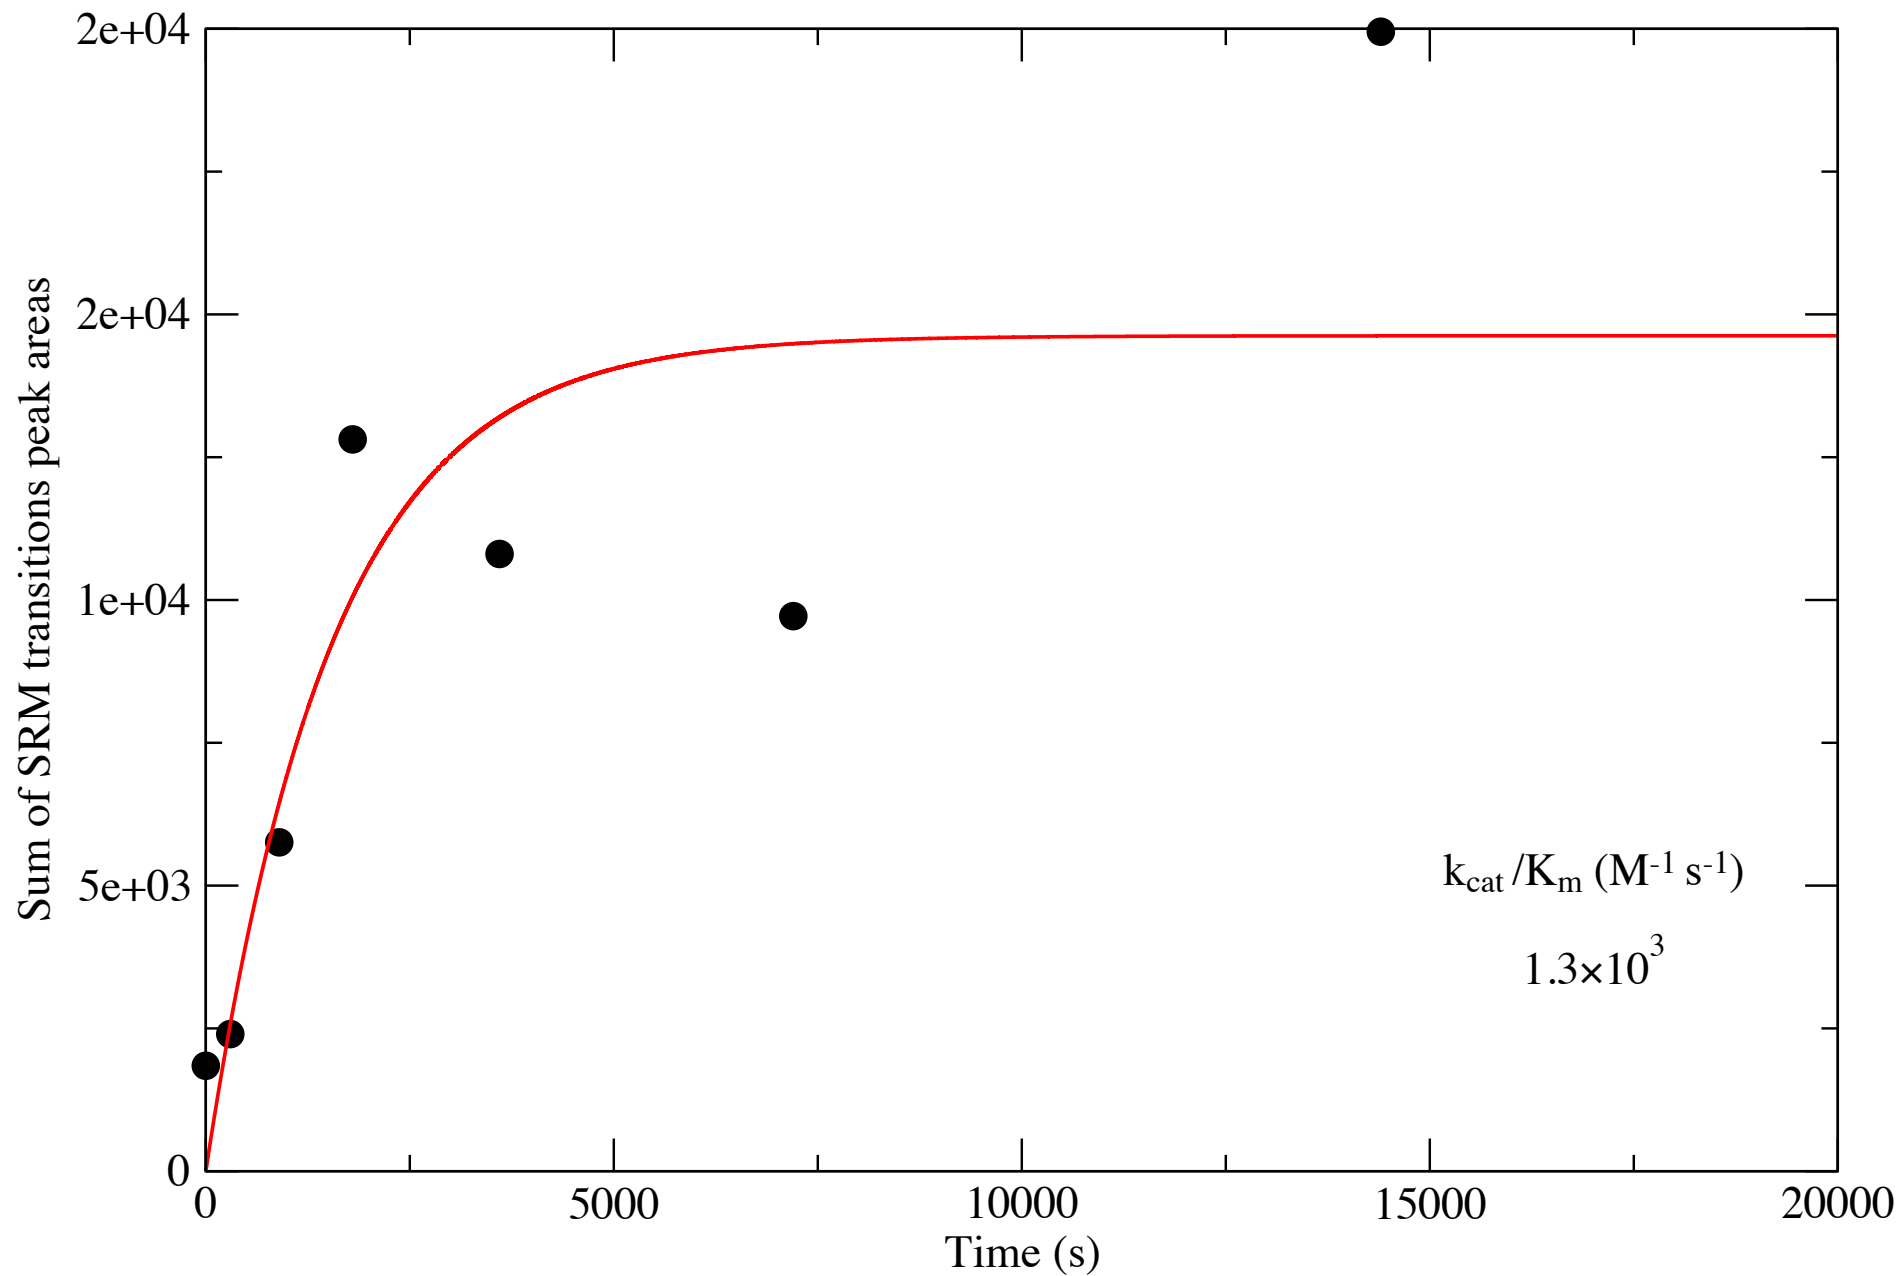

# IF4G2\_HUMAN (AVKDLGVFIPAPMAQGMR)

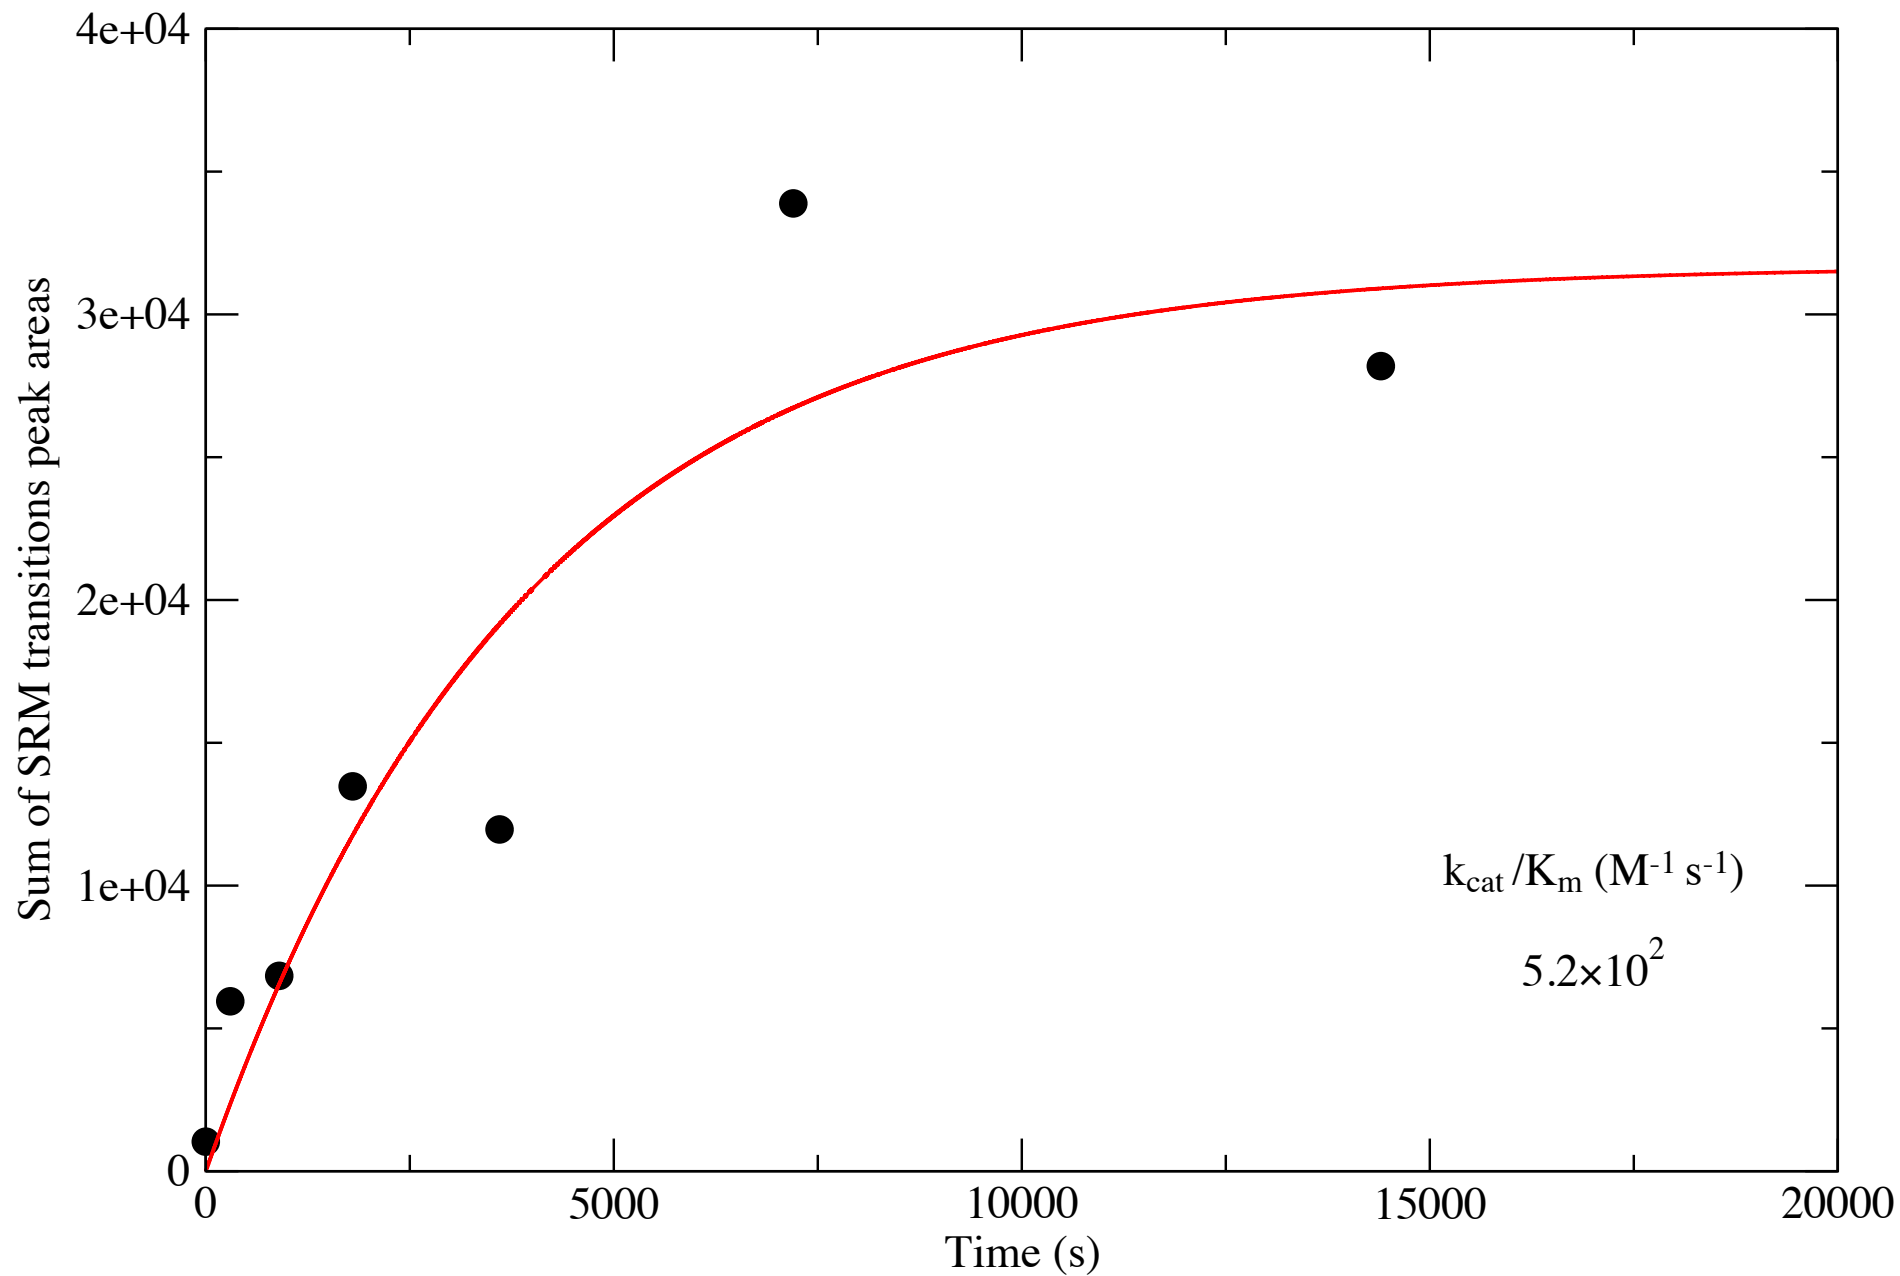

# IF4G3\_HUMAN (GQTEEILDSQNLNSR)

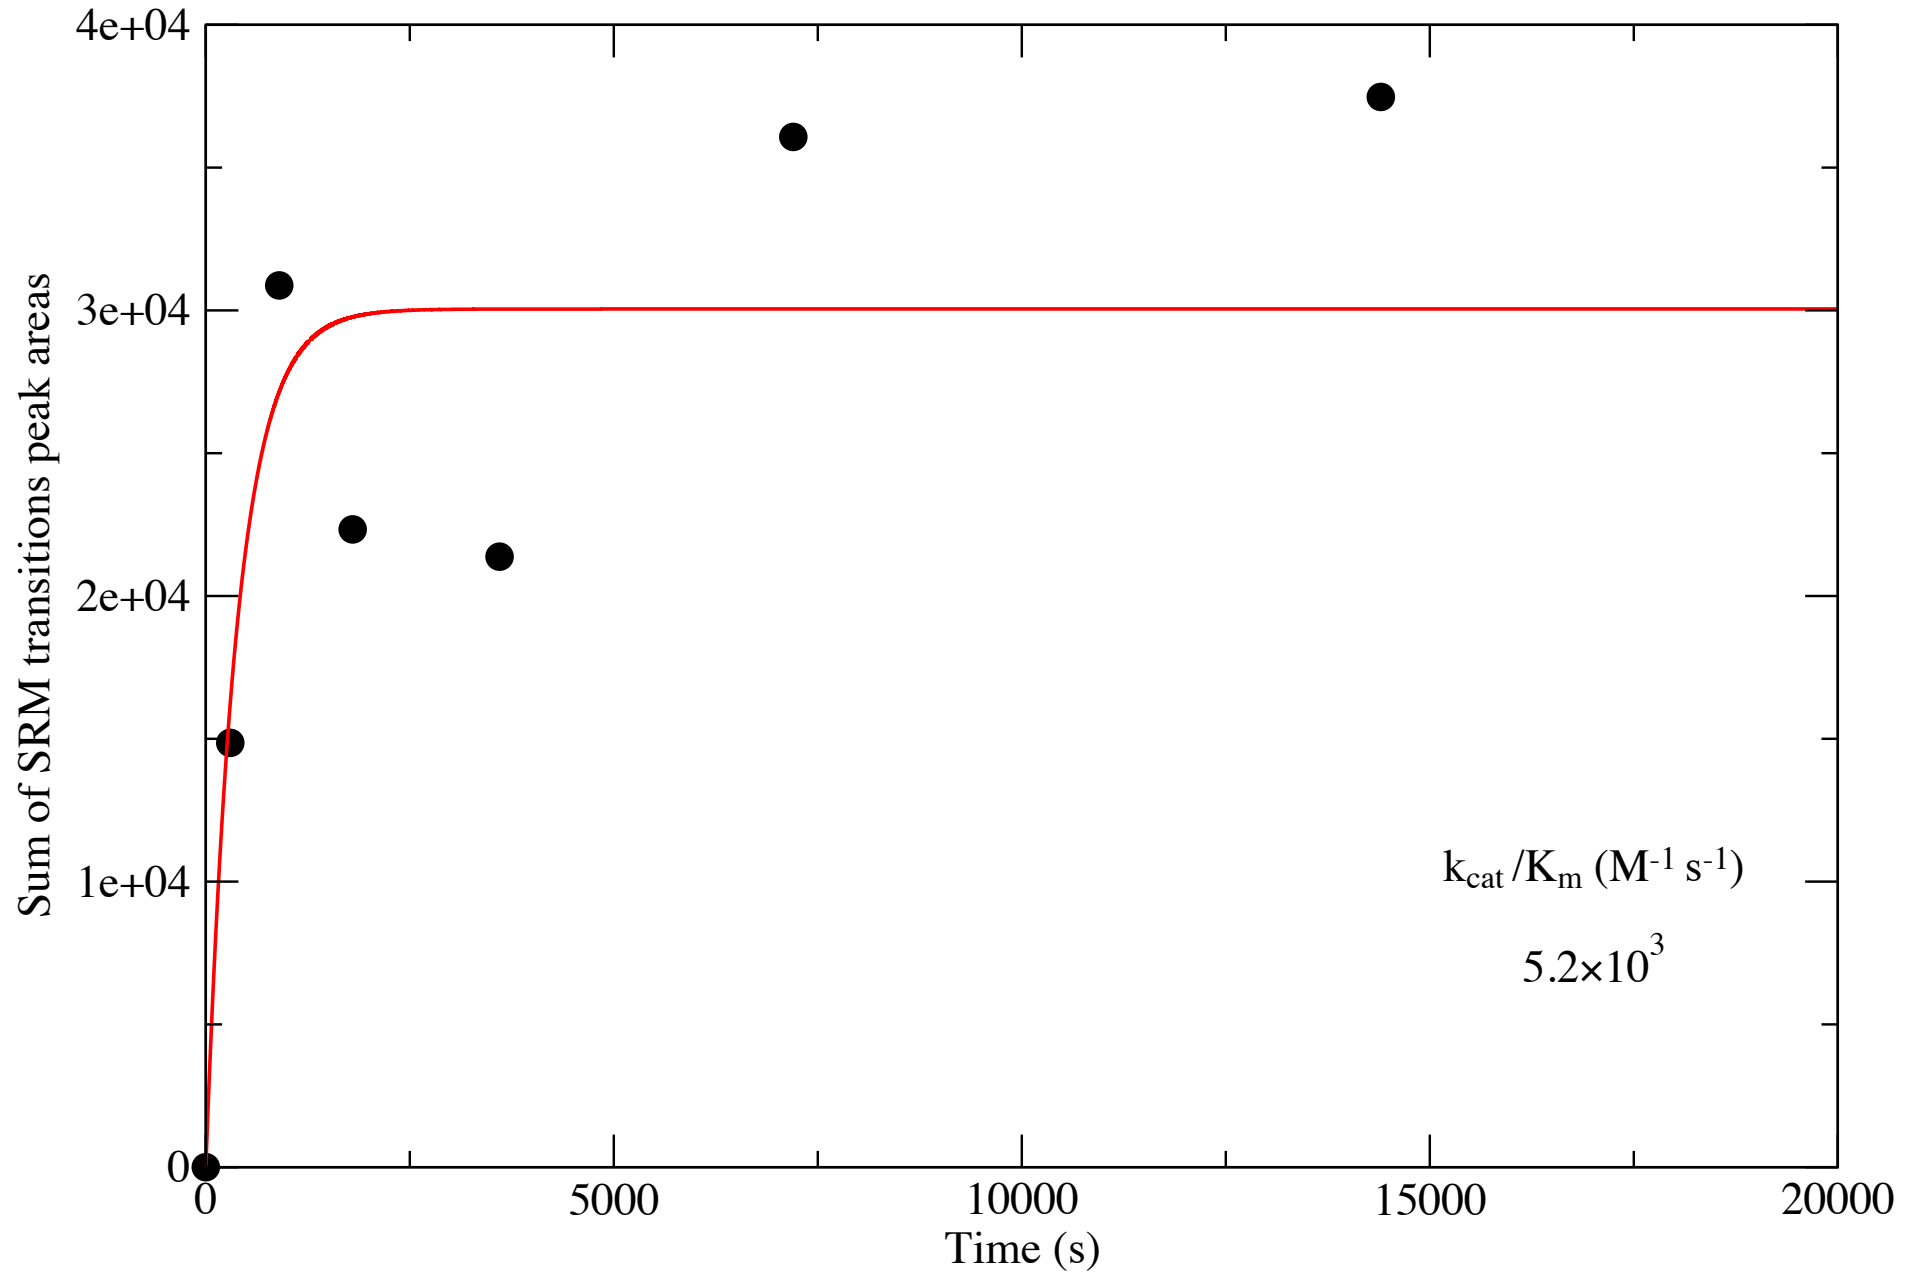



# IF4G3\_HUMAN (GQTEEILDSQNLNSRR)

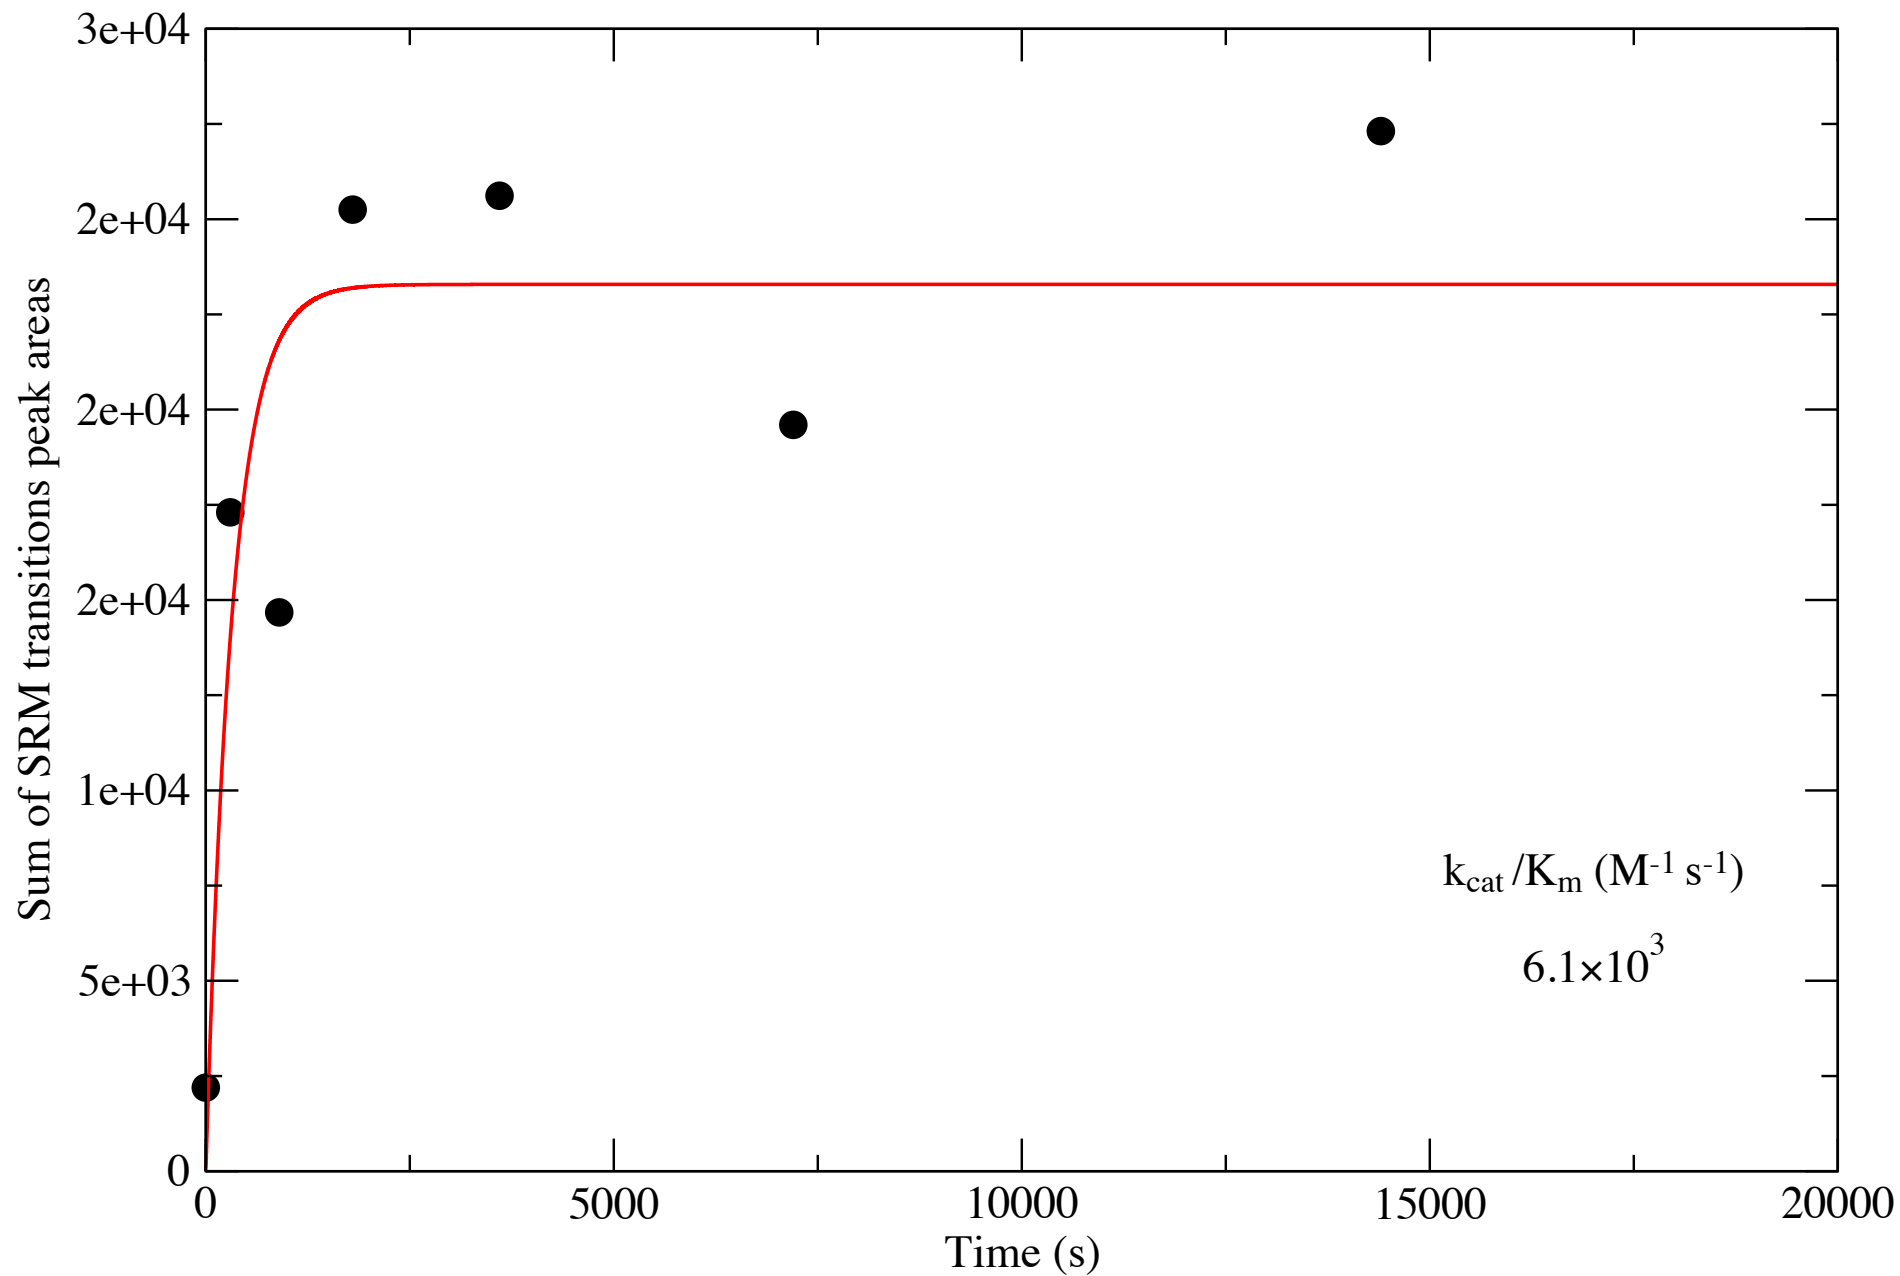

# IFT88\_HUMAN (AAFQQAVR)

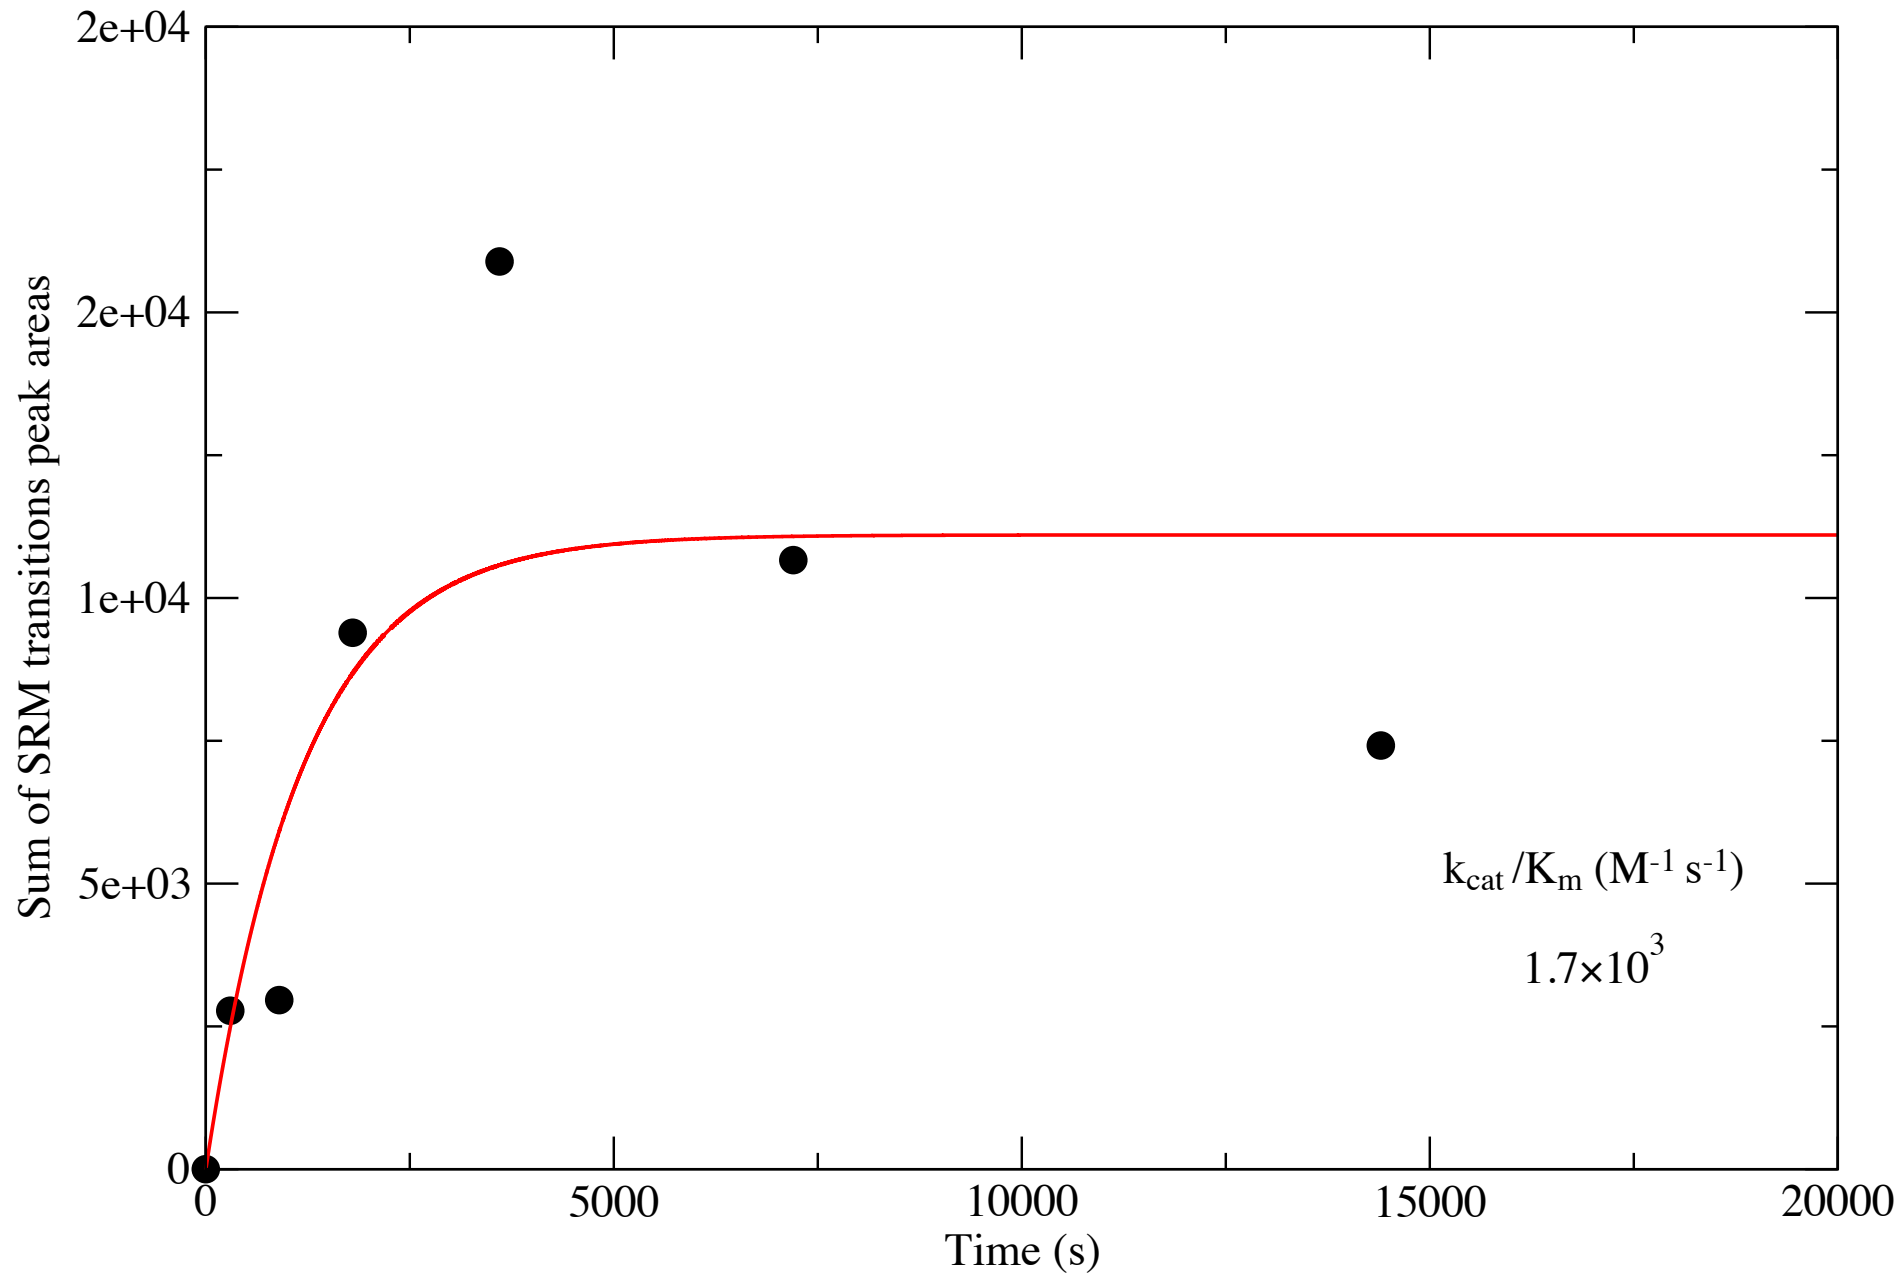

# INF2\_HUMAN (AVTPGPQPTLEQLEEGGPRPLER)

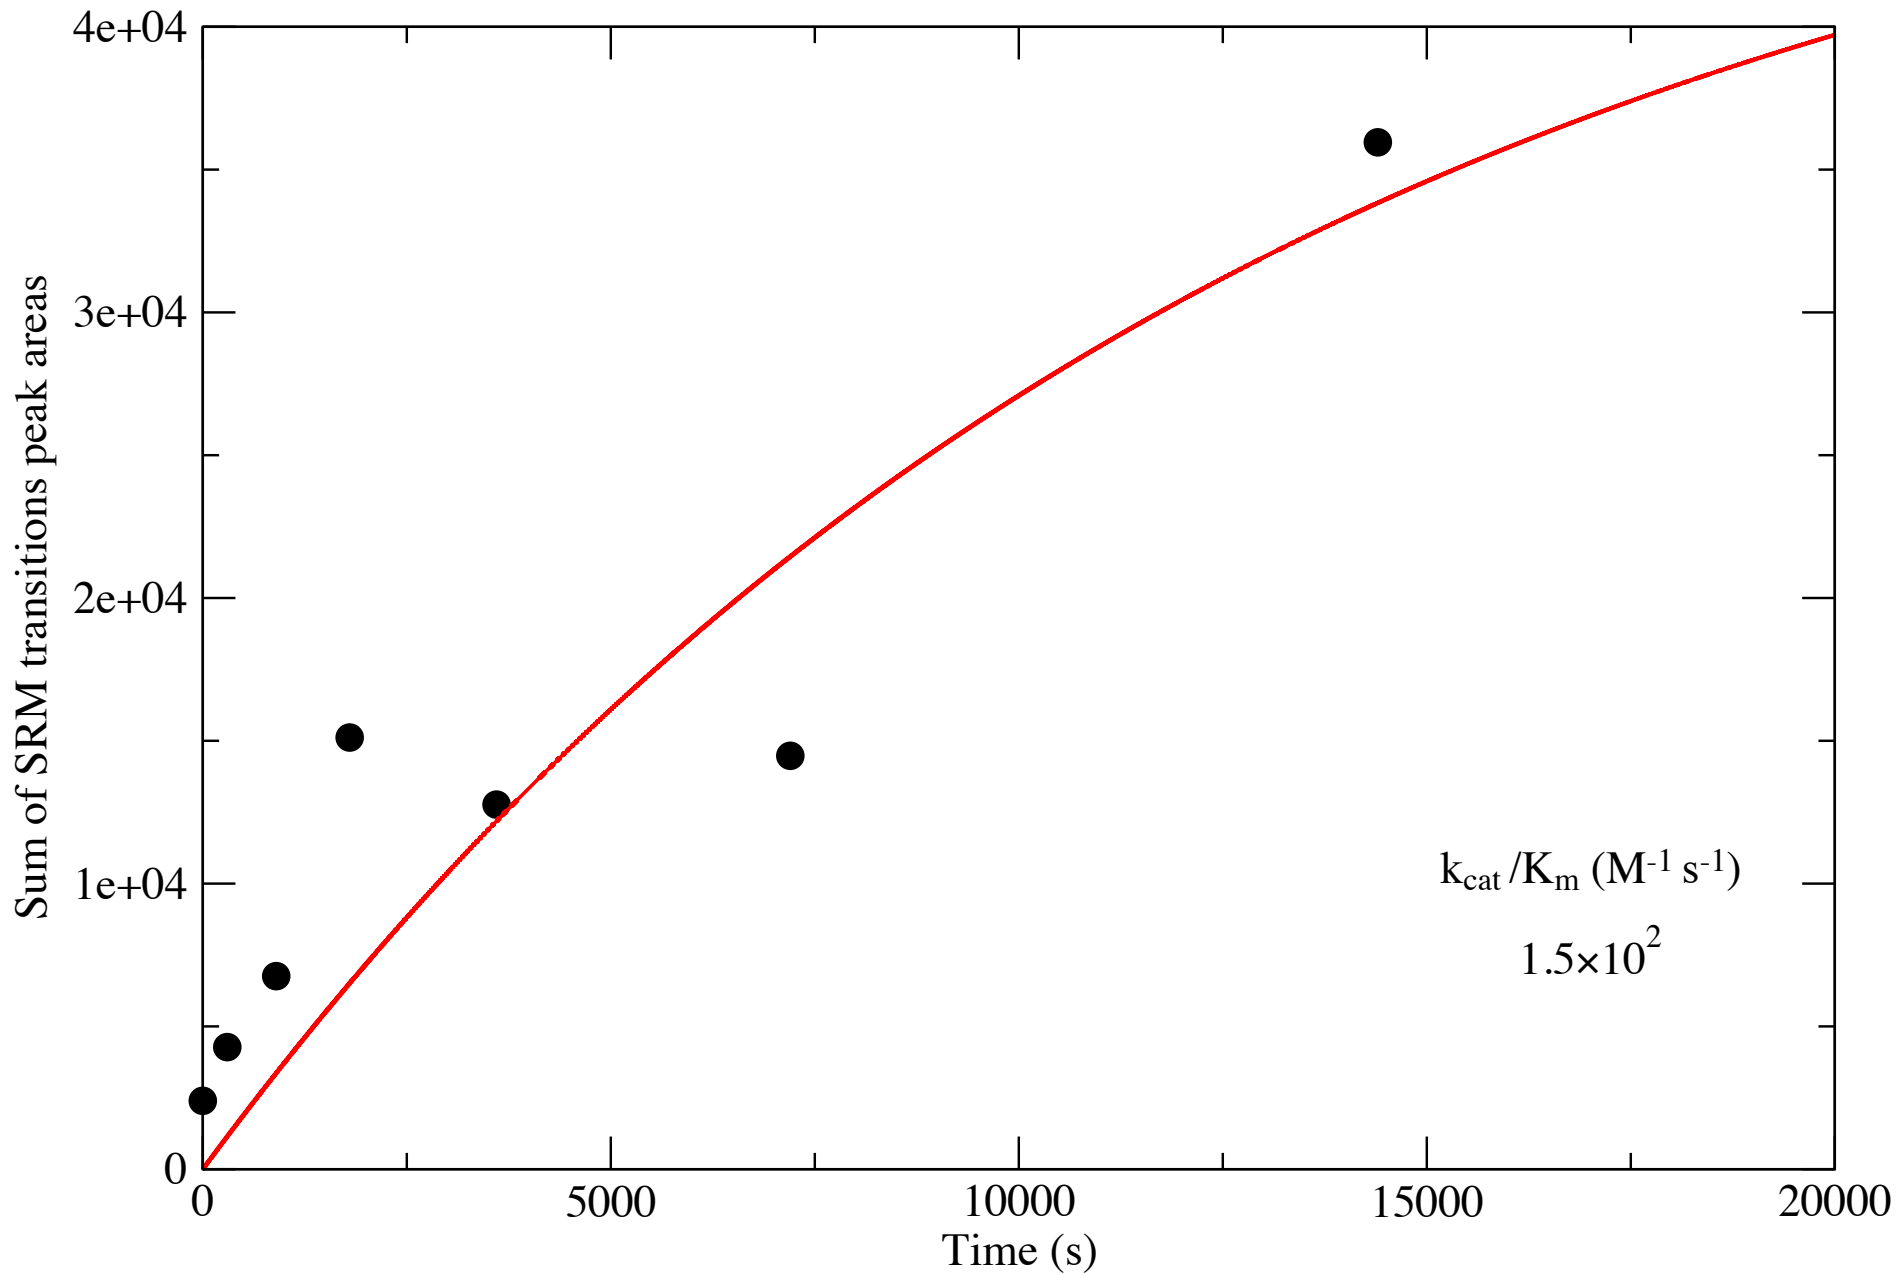

# IQGA1\_HUMAN (GLGVARPHYGSLDNER)

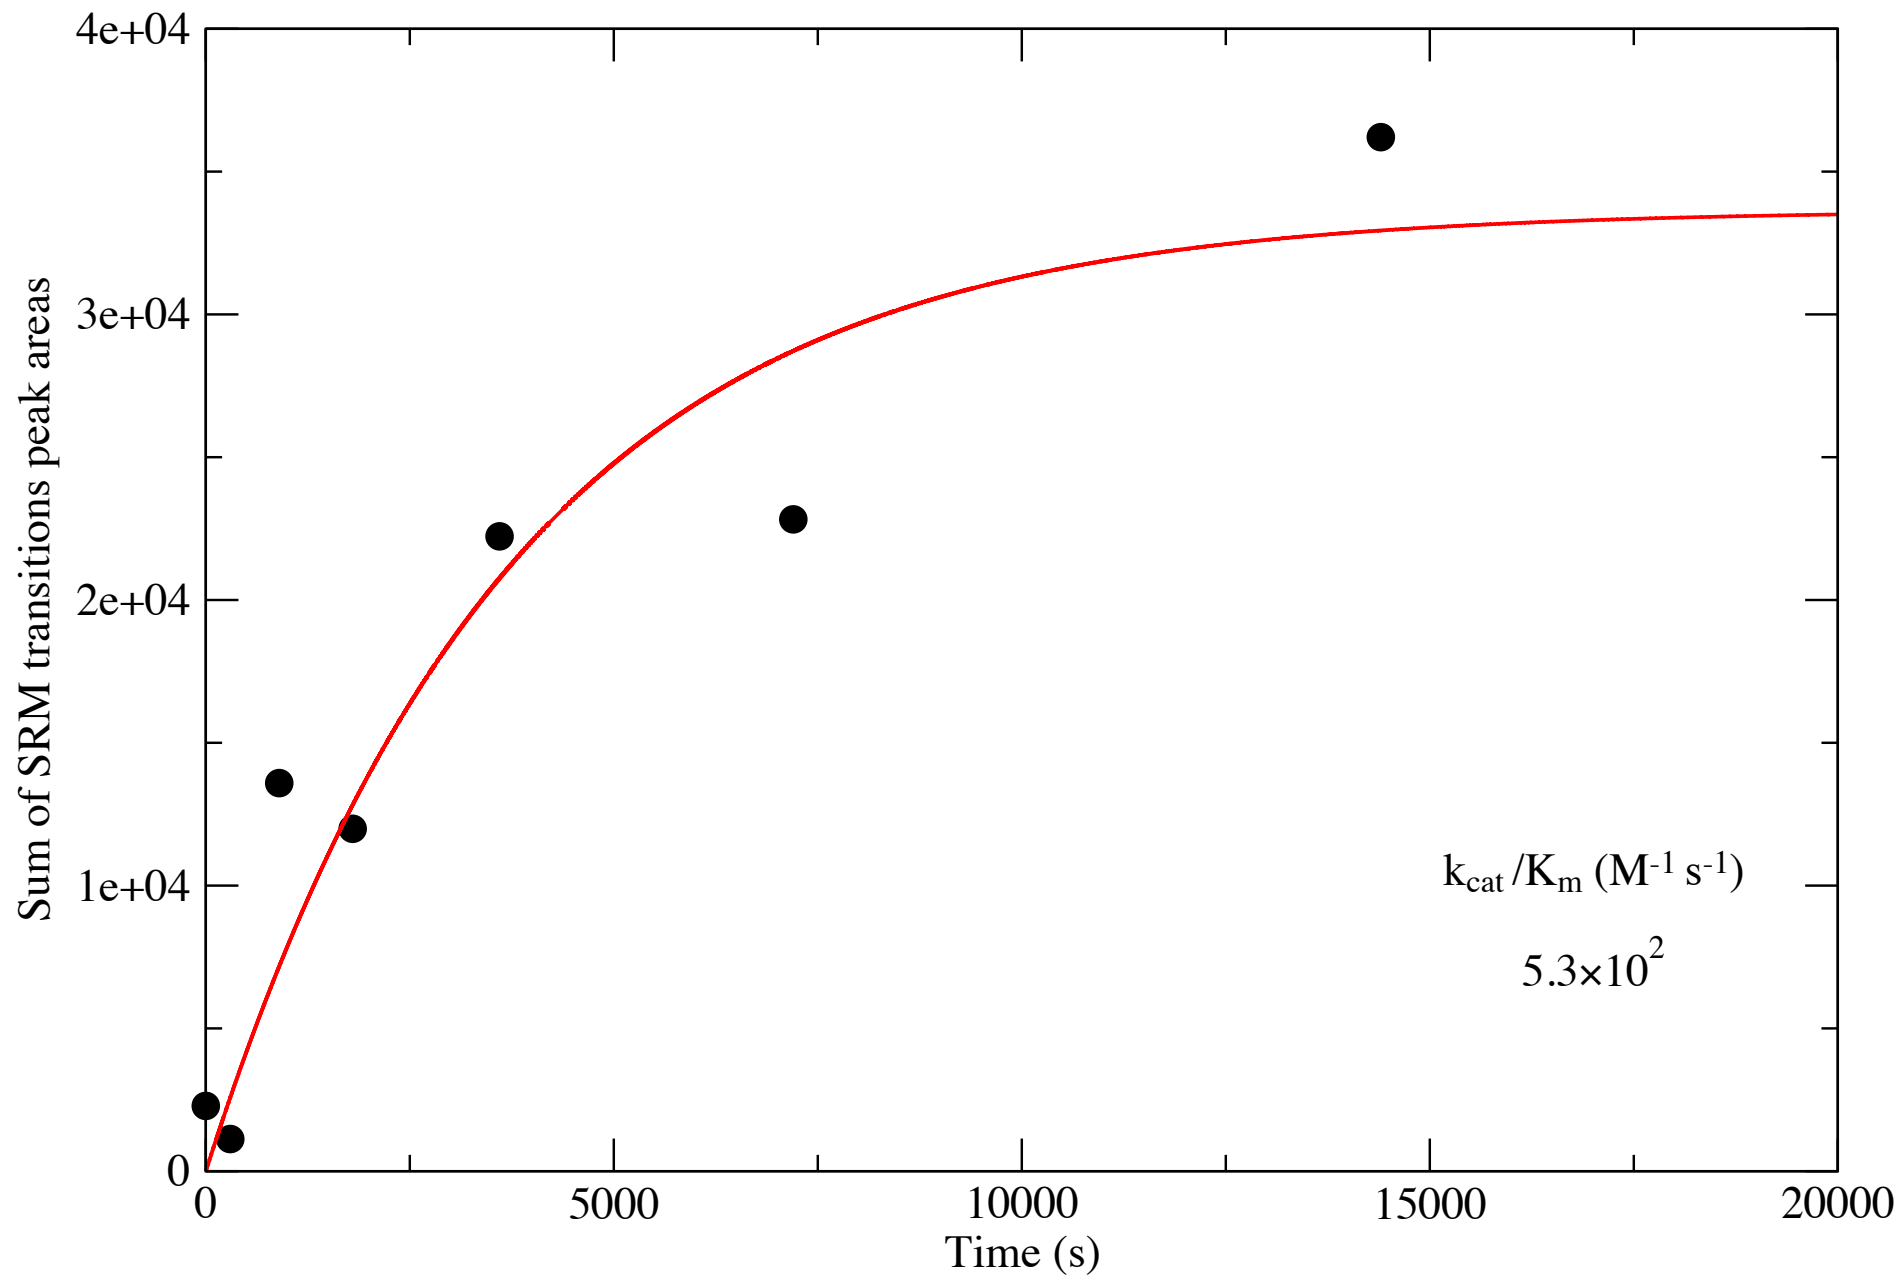

# ISY1\_HUMAN (GVIVPLEQEYEK)

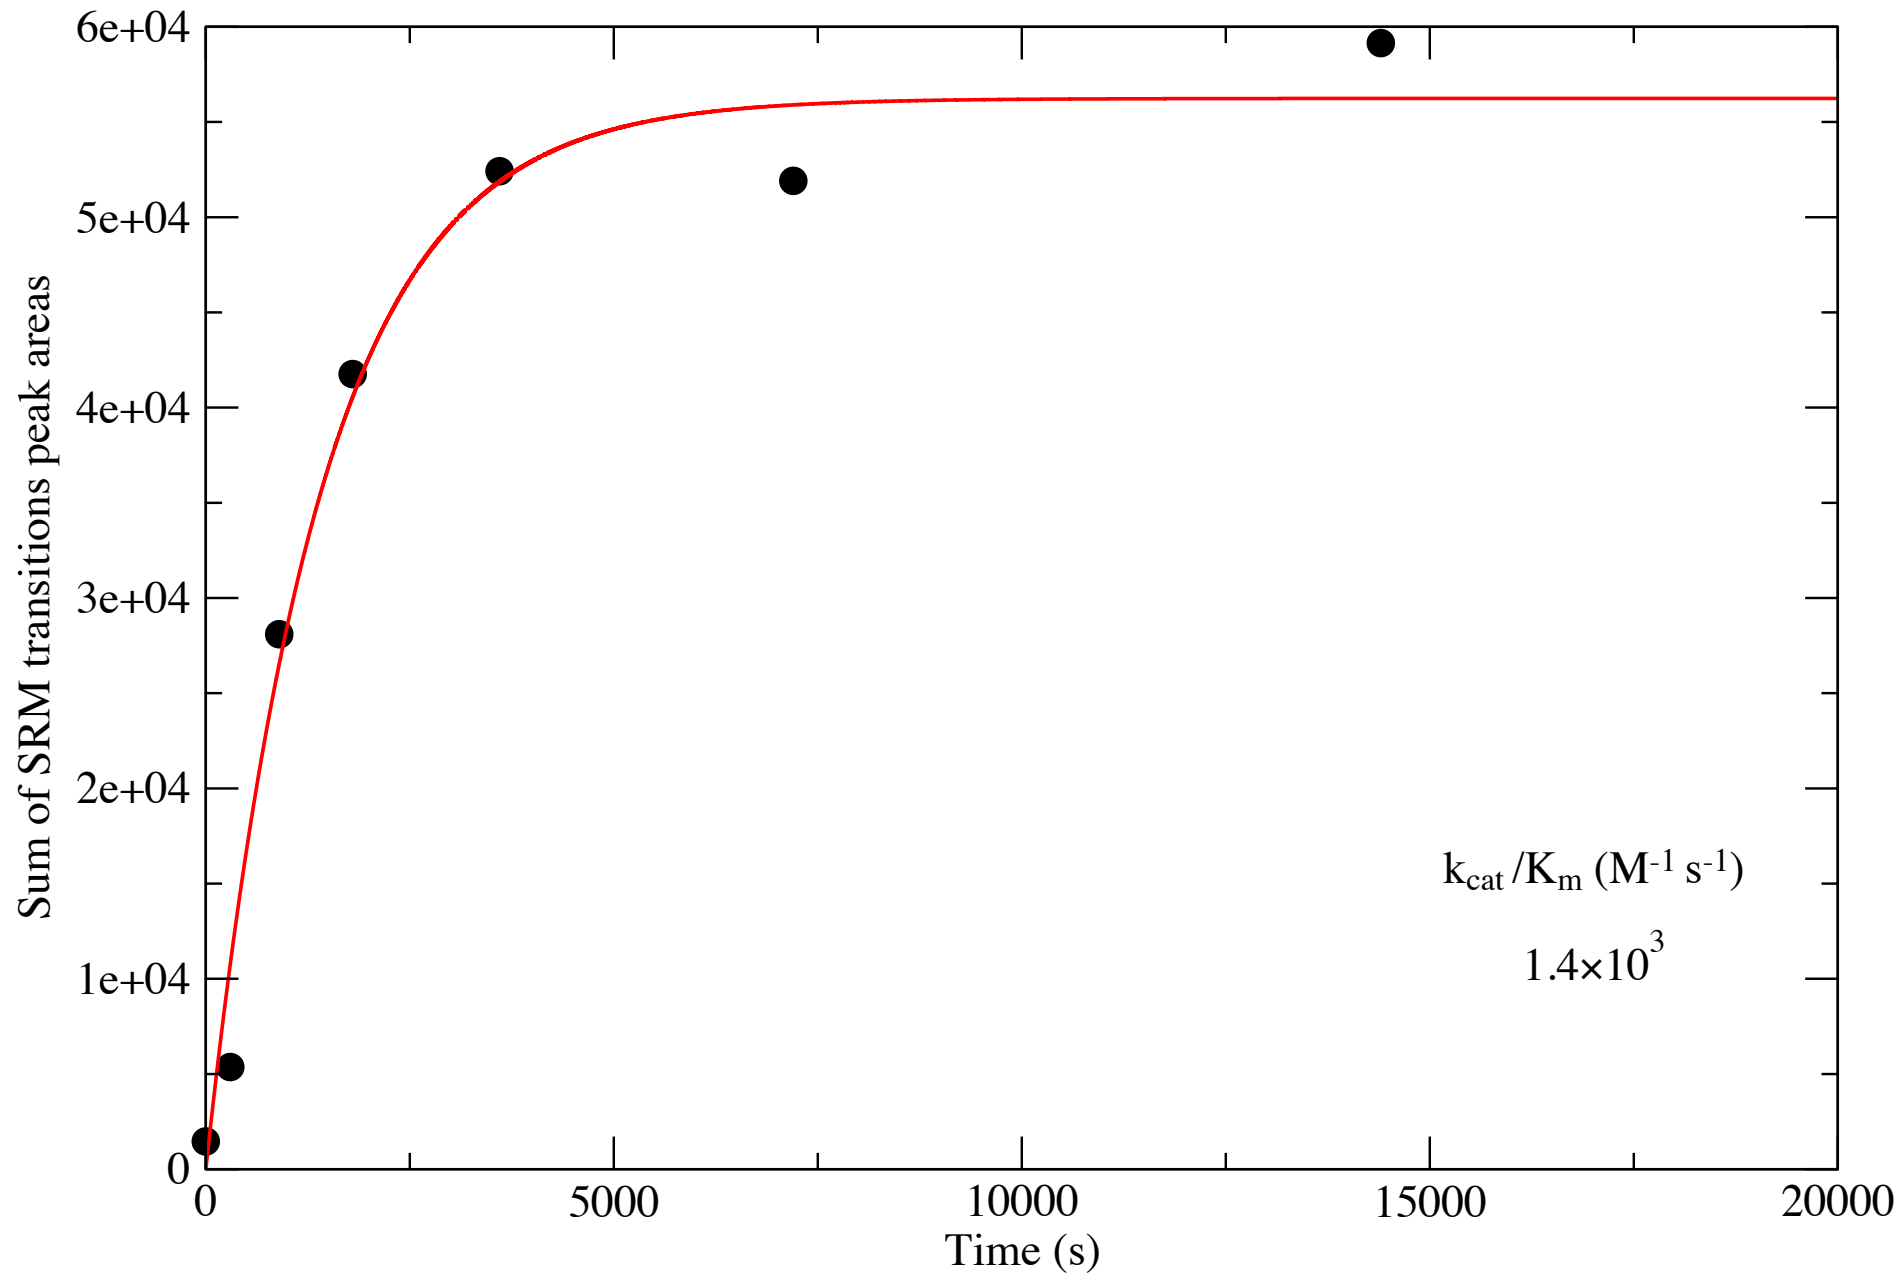

# JKIP1\_HUMAN (AVQMANEELR)

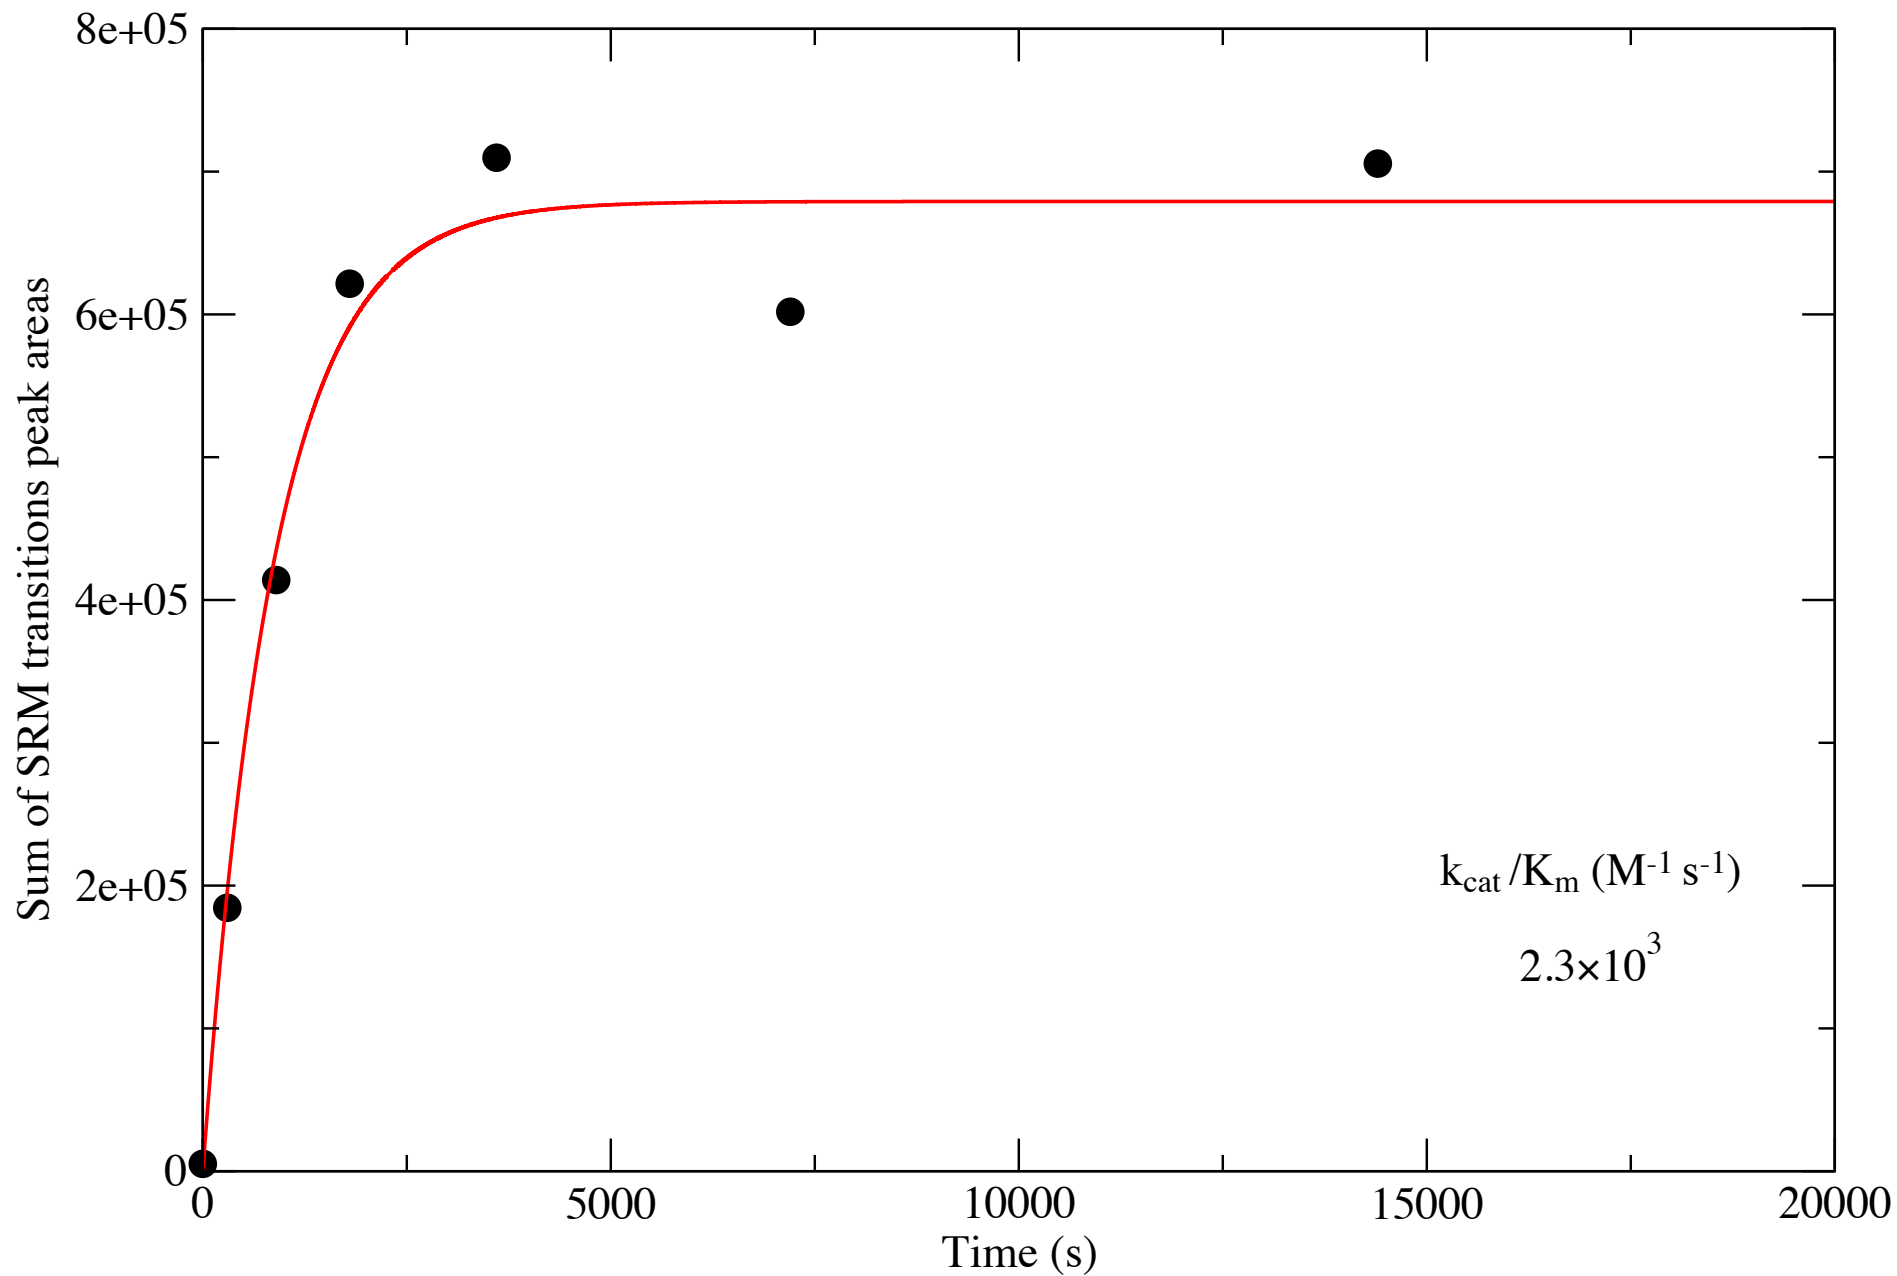

# JMY\_HUMAN (SLPSVLQVEEK)

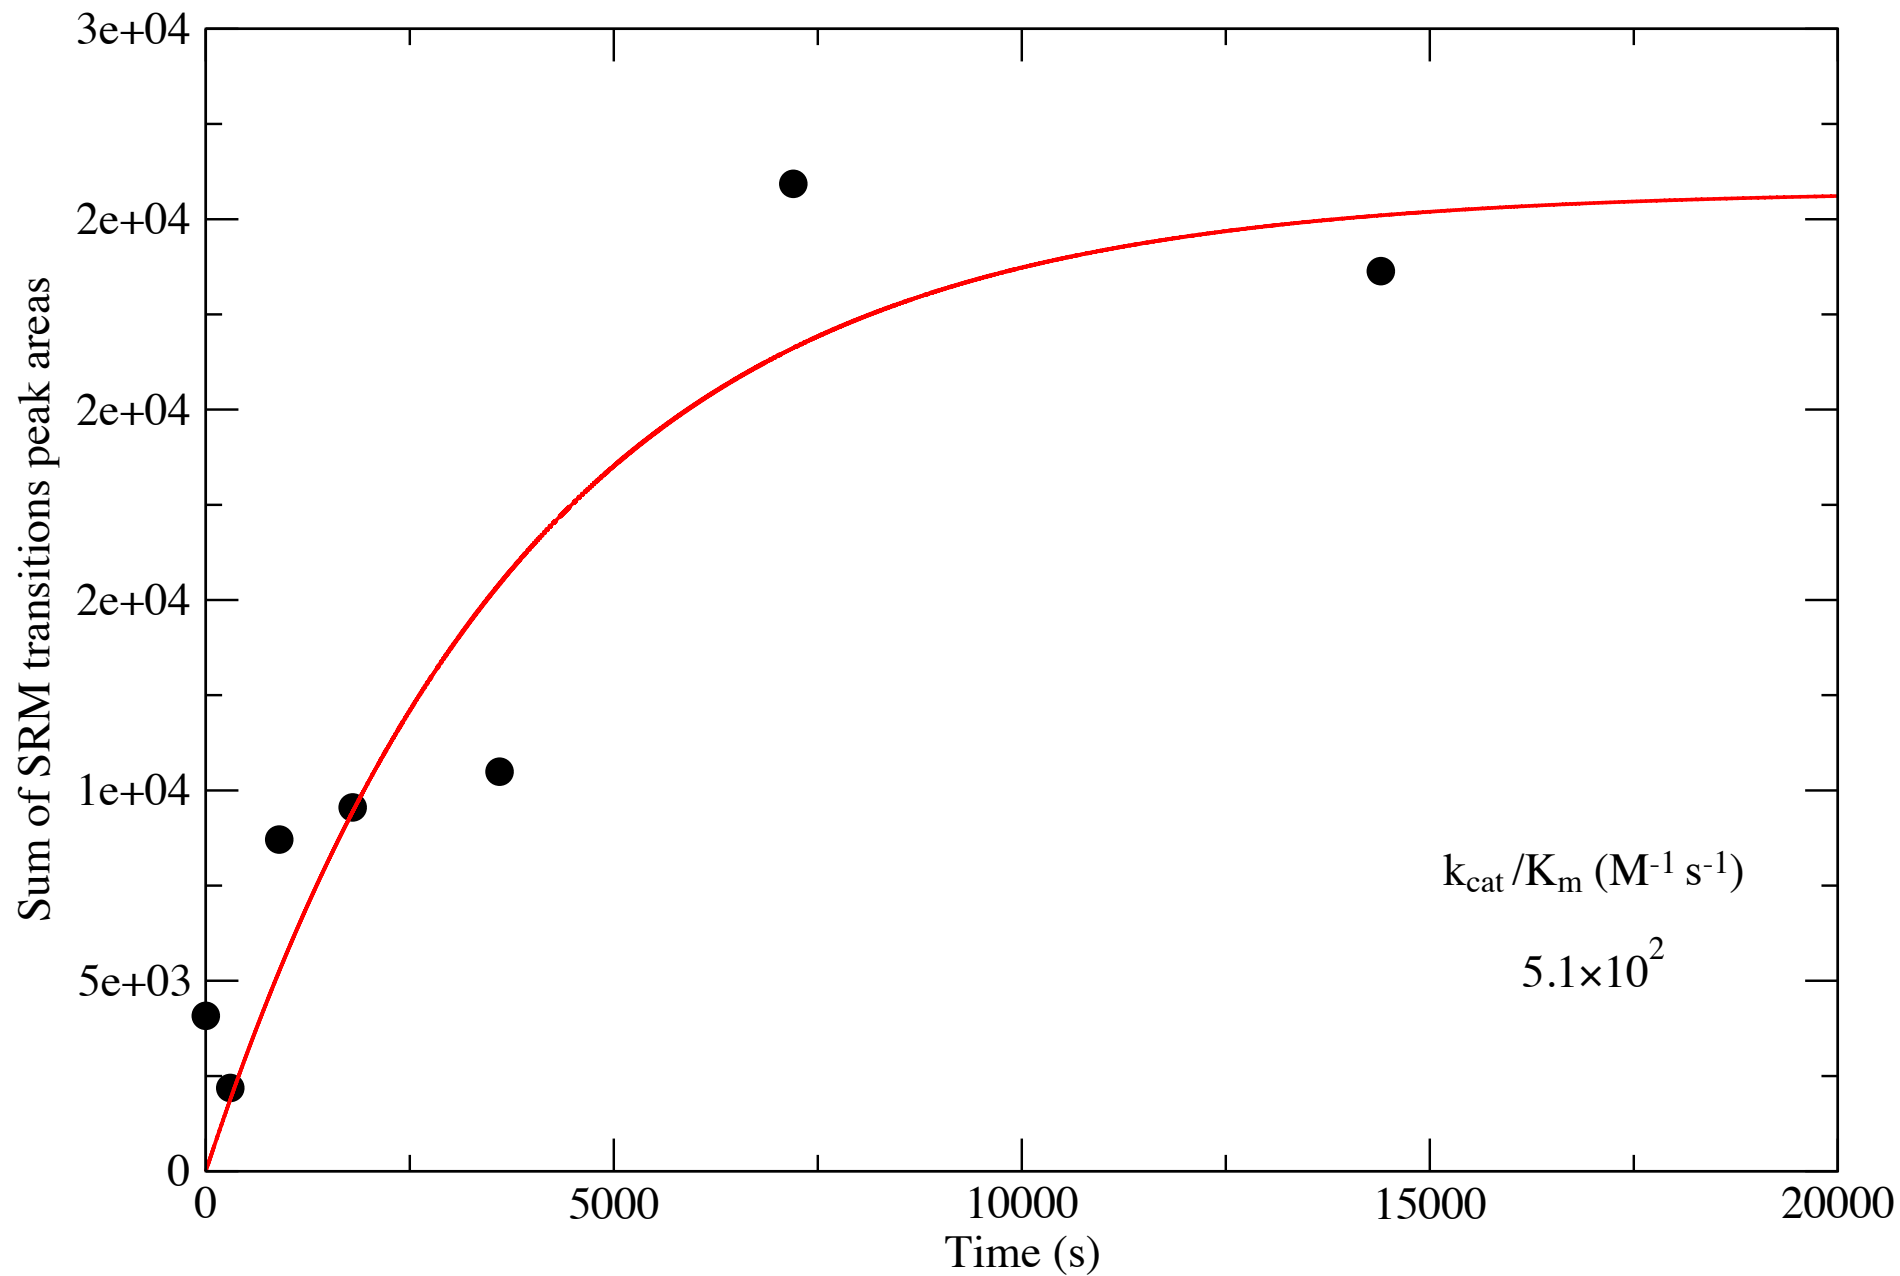

# K0754\_HUMAN (GTPEGPVTTPATTVHAPEEPDTAAVR)

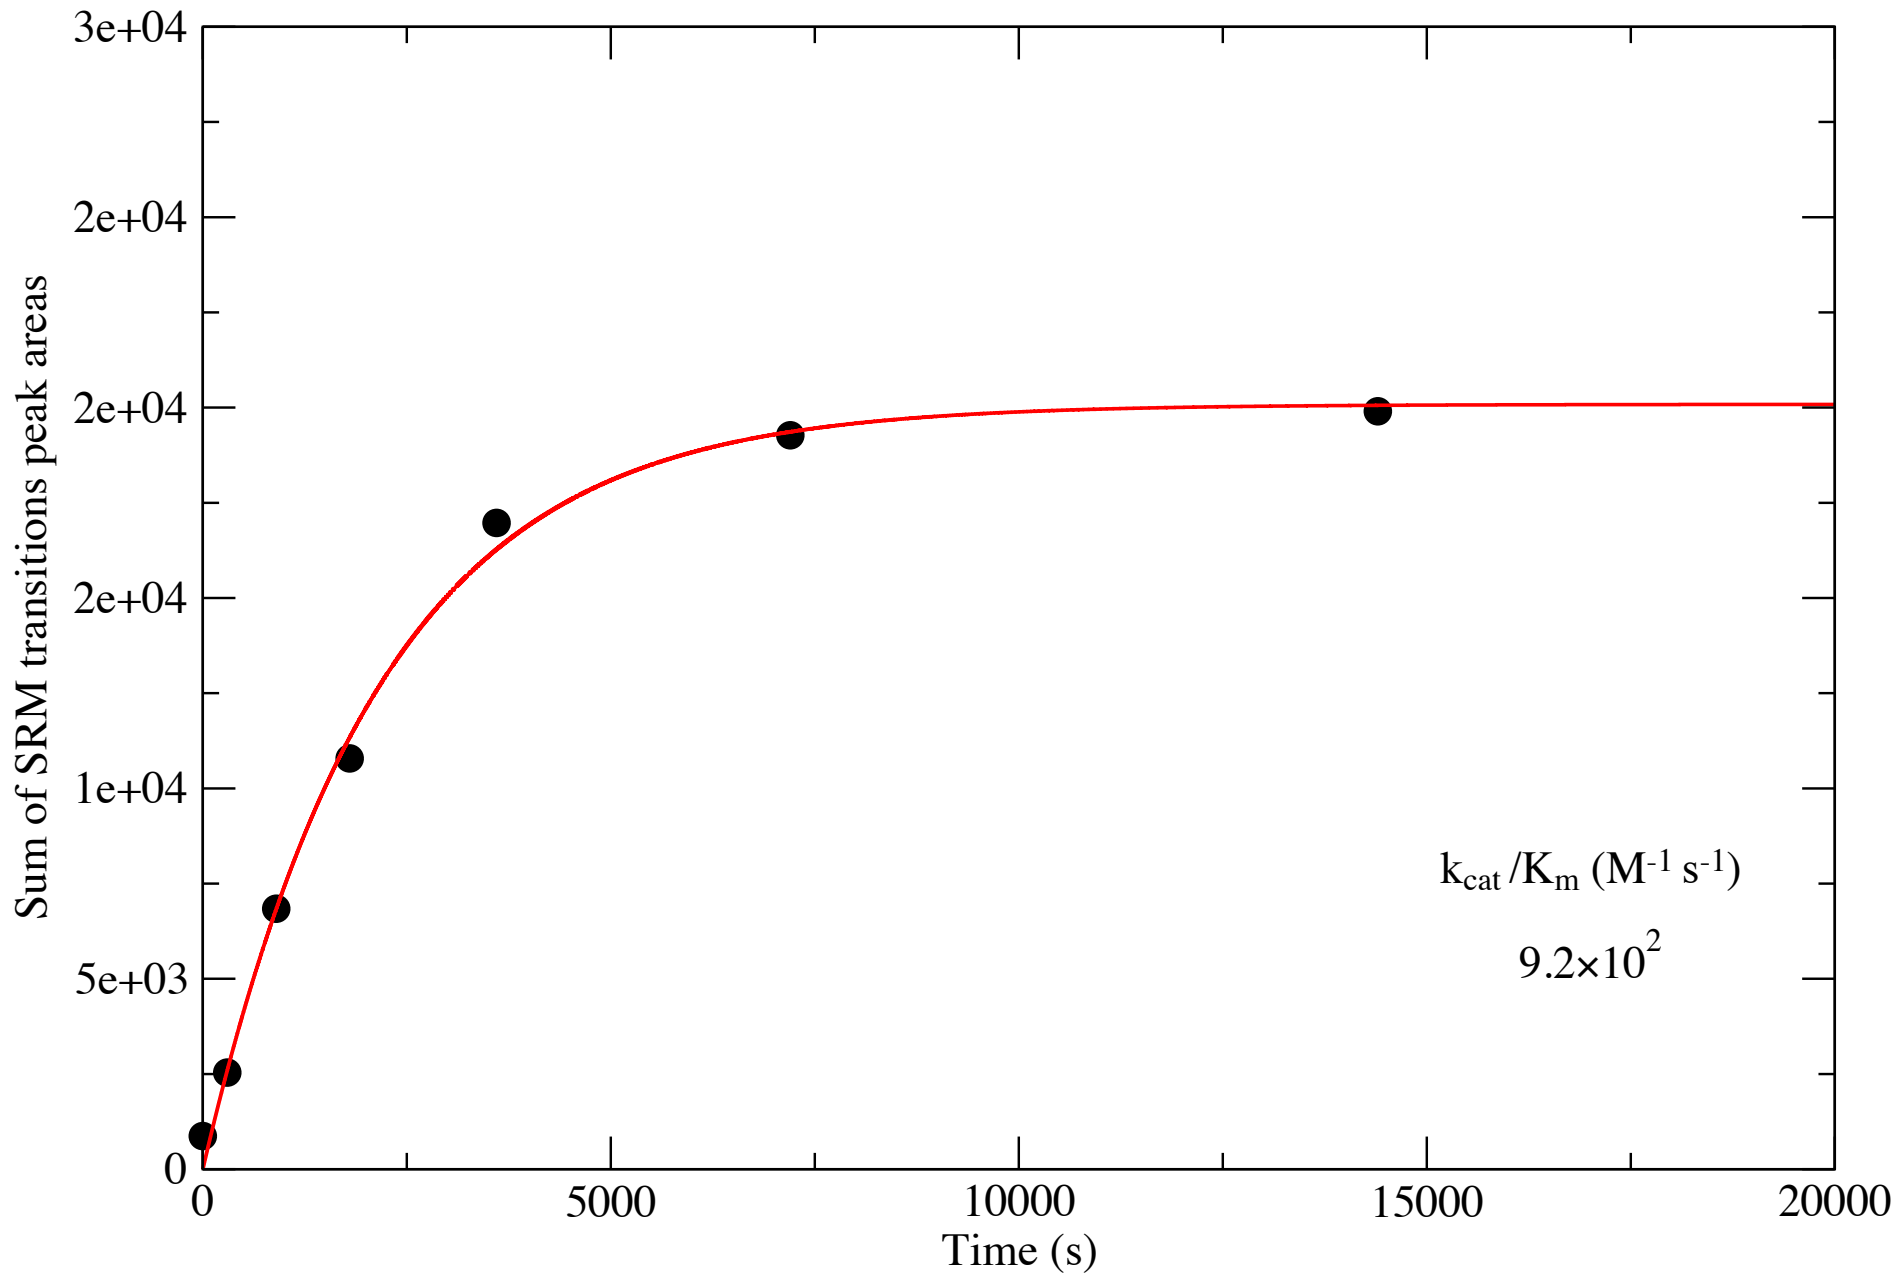



# KLDC4\_HUMAN (GTVVTIKQVLTAPGSAGQPR)

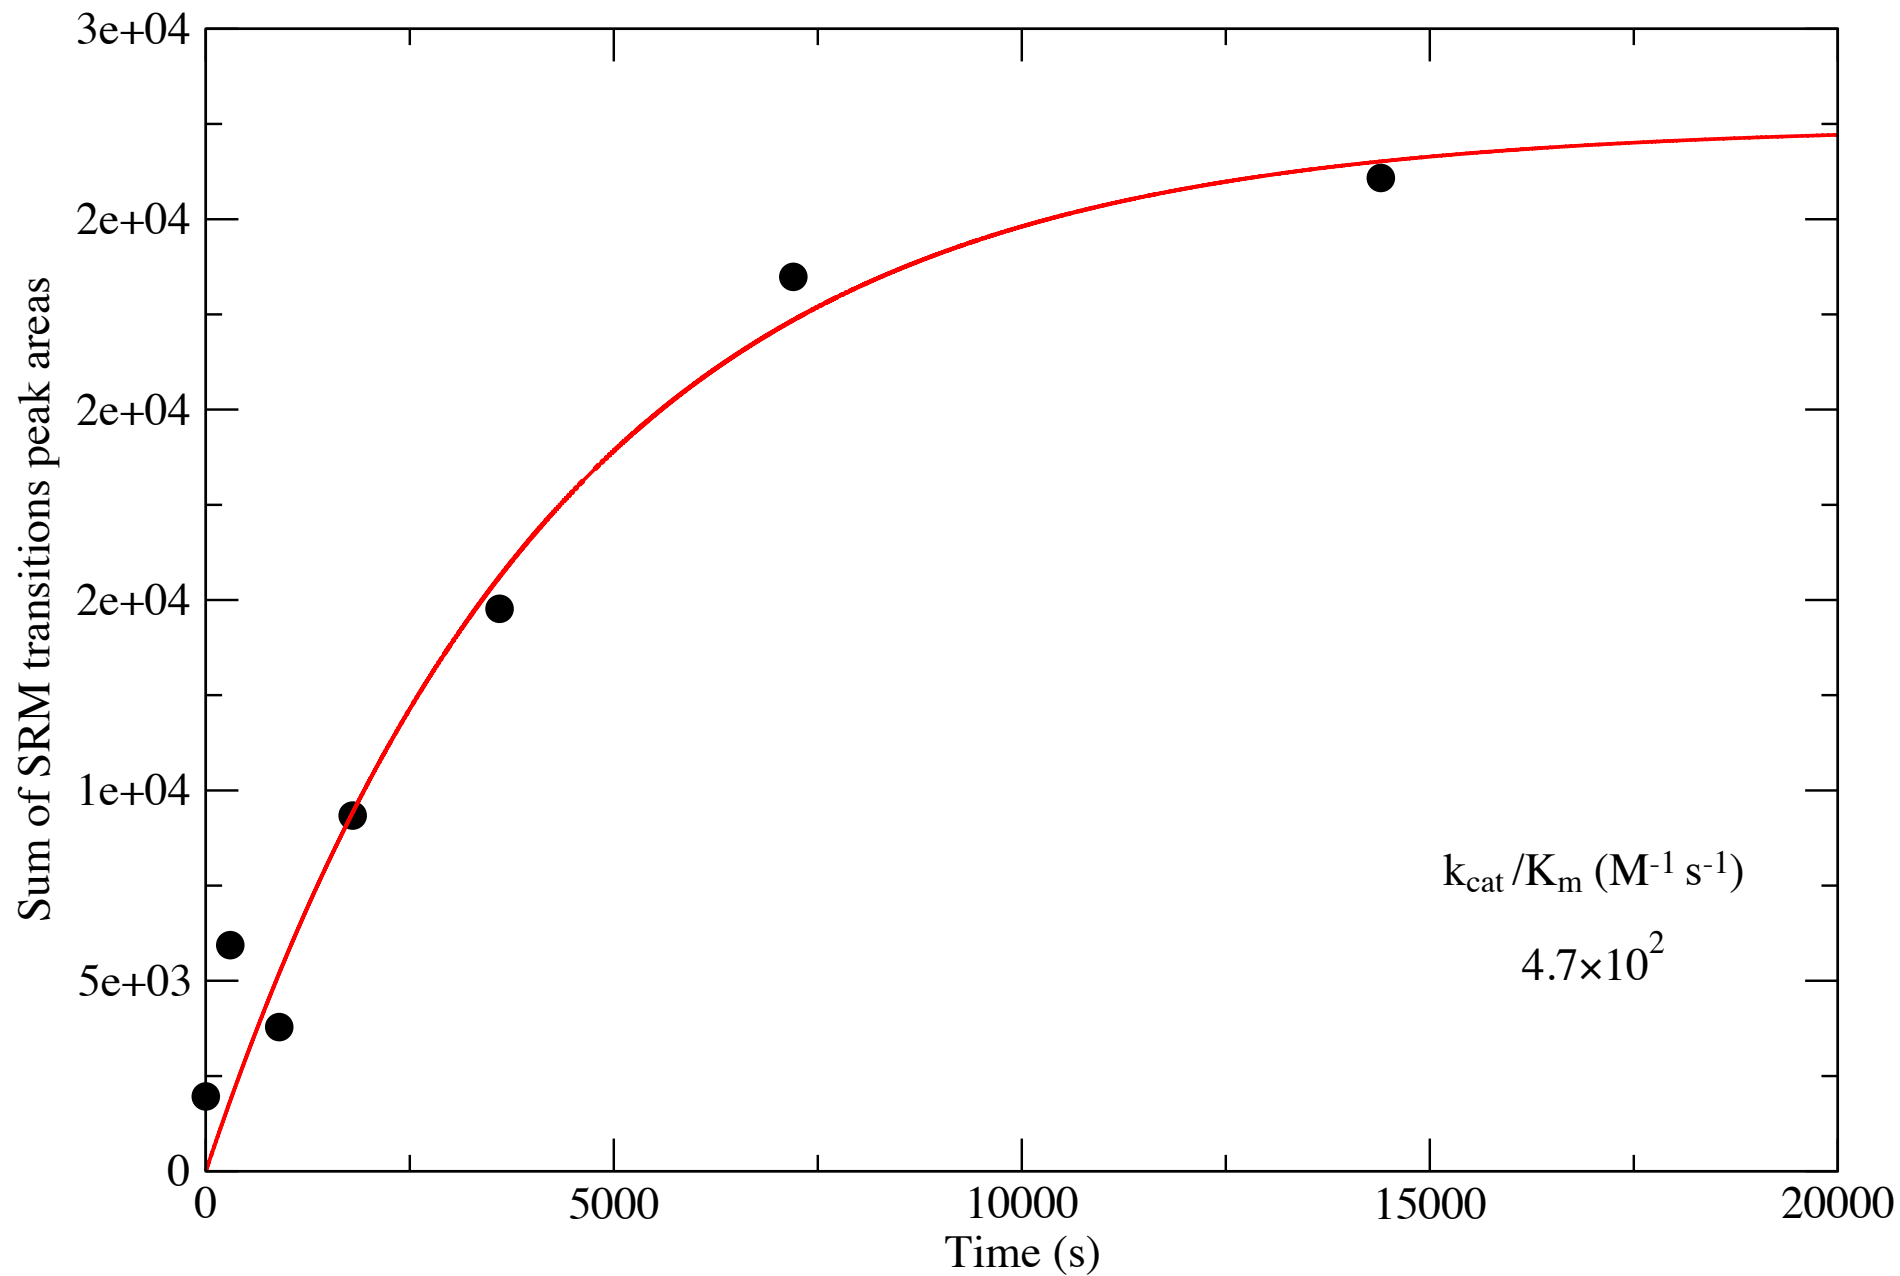

# KTNA1\_HUMAN (GVGGTSEND DPSK)

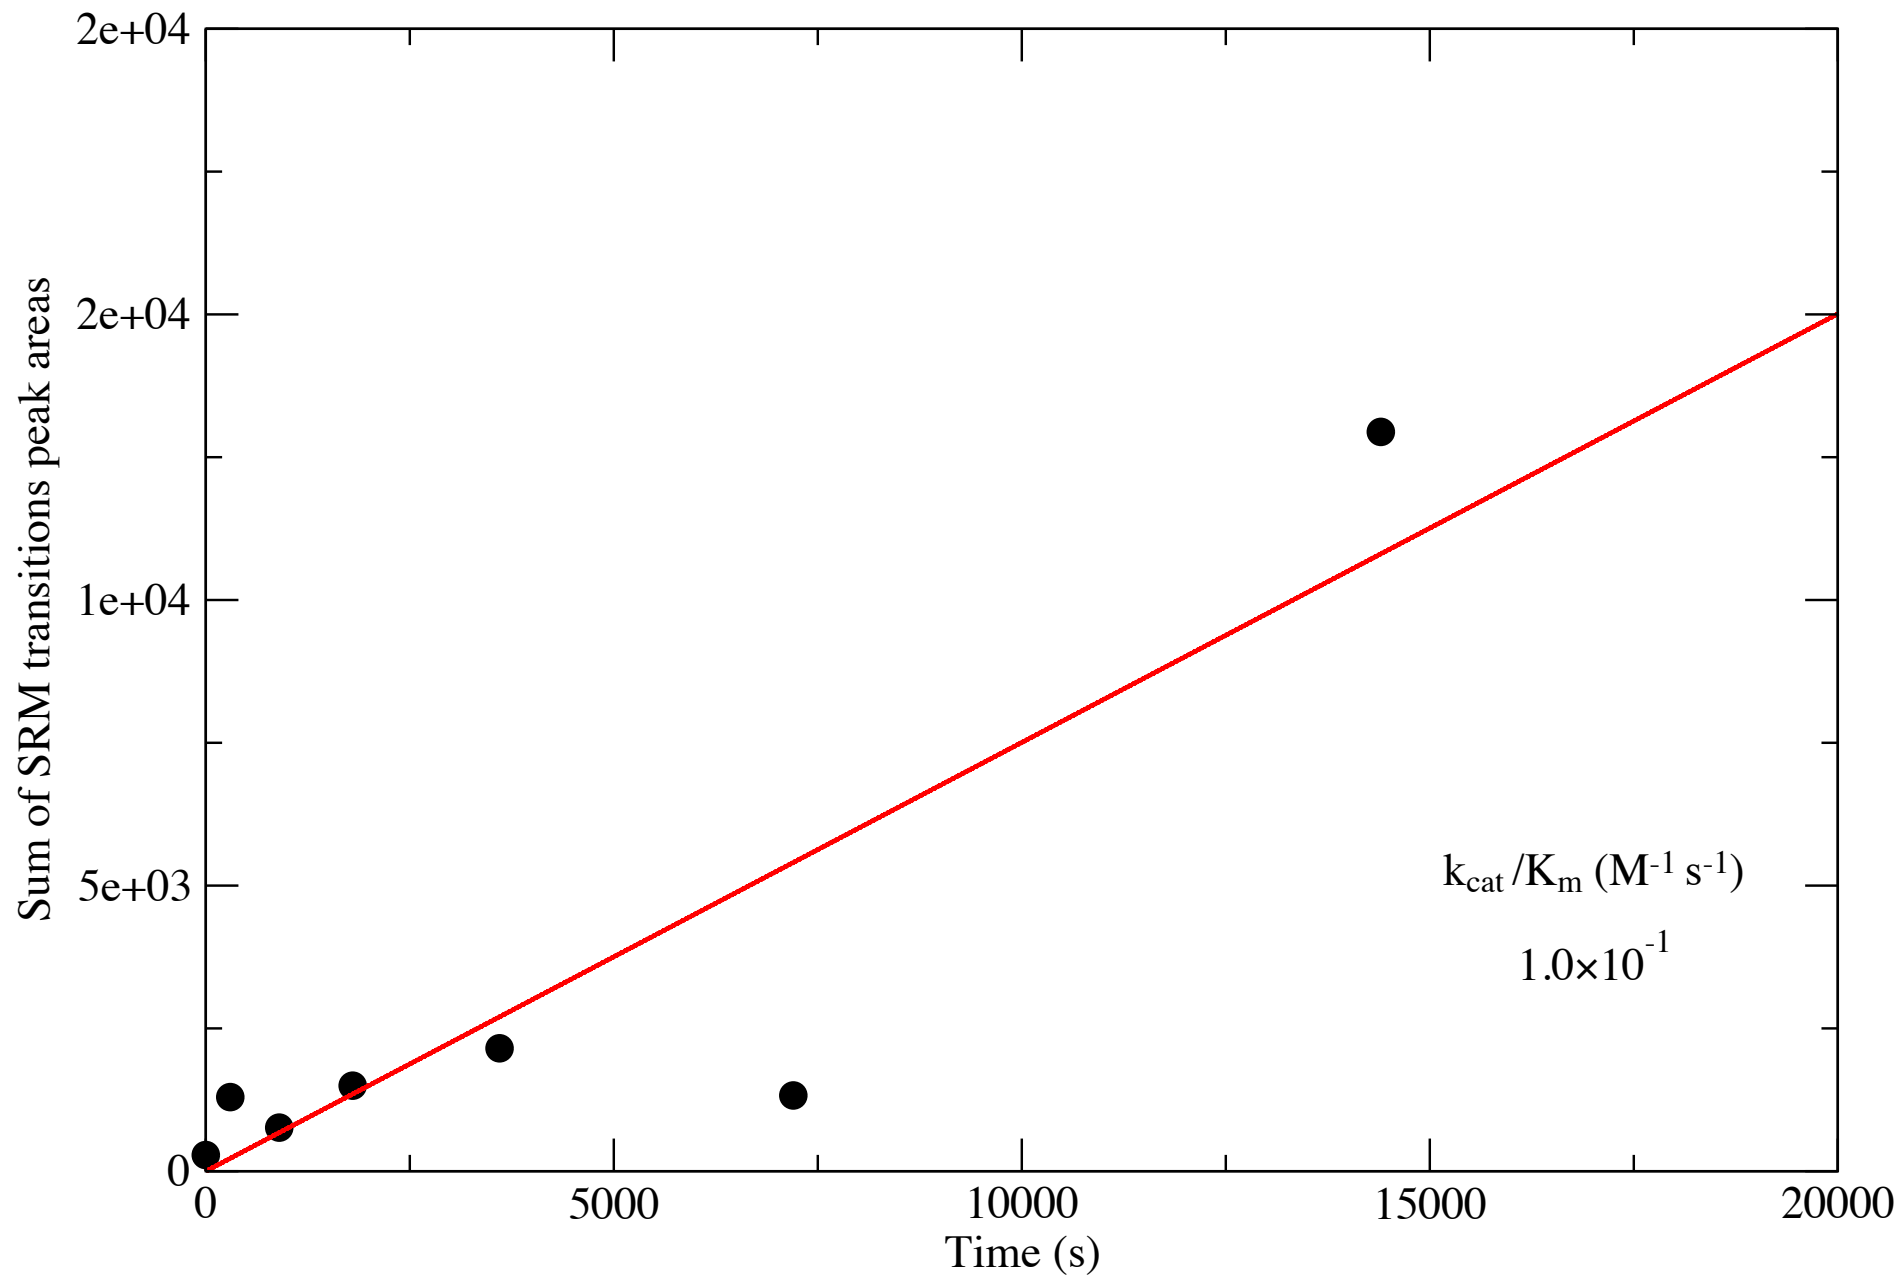

# LAR4B\_HUMAN (SLPENSETGGNESQPDSQEDPREVLKK)

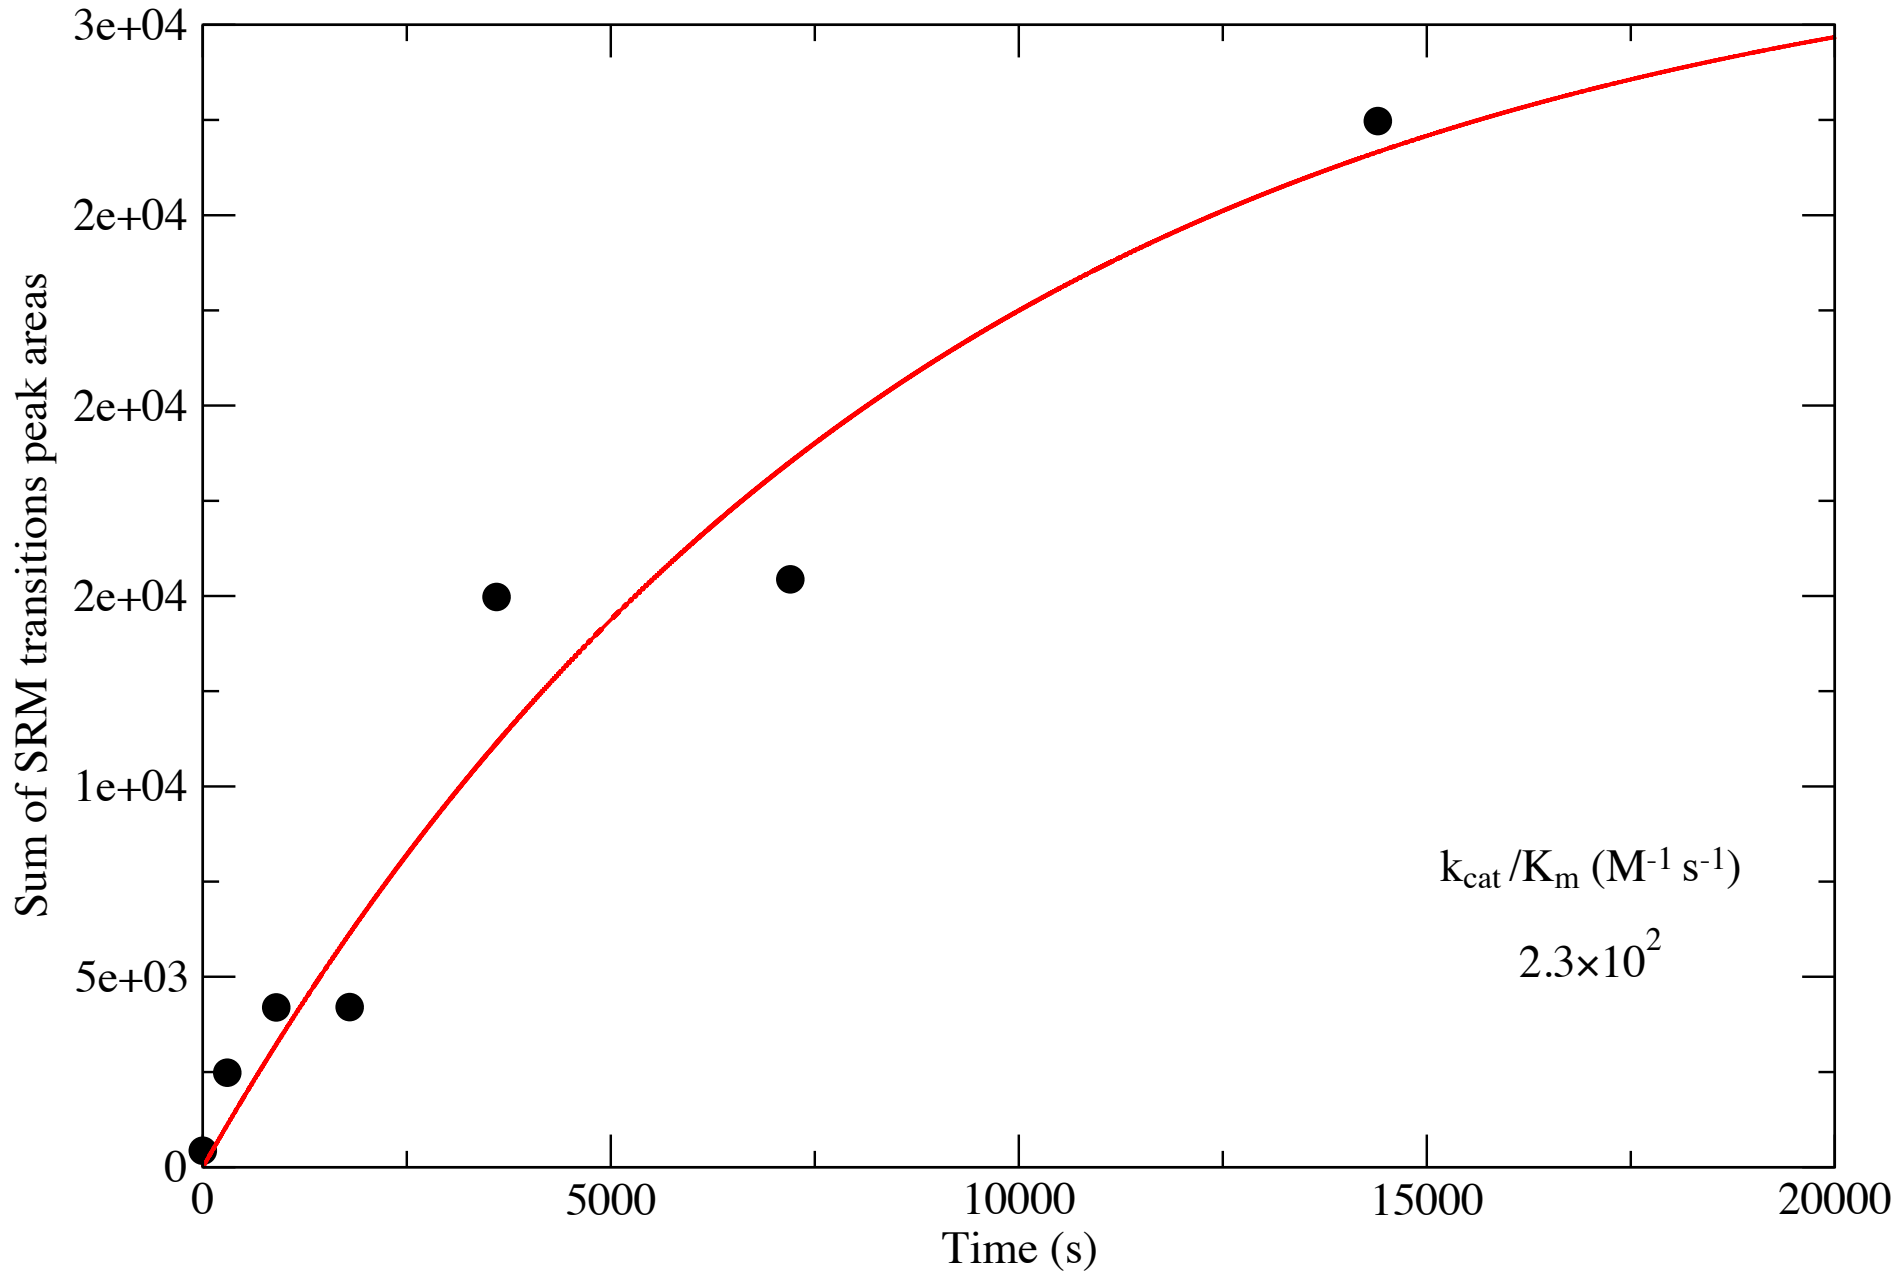

# LARP1\_HUMAN (FSQLLNCPEFVPR)

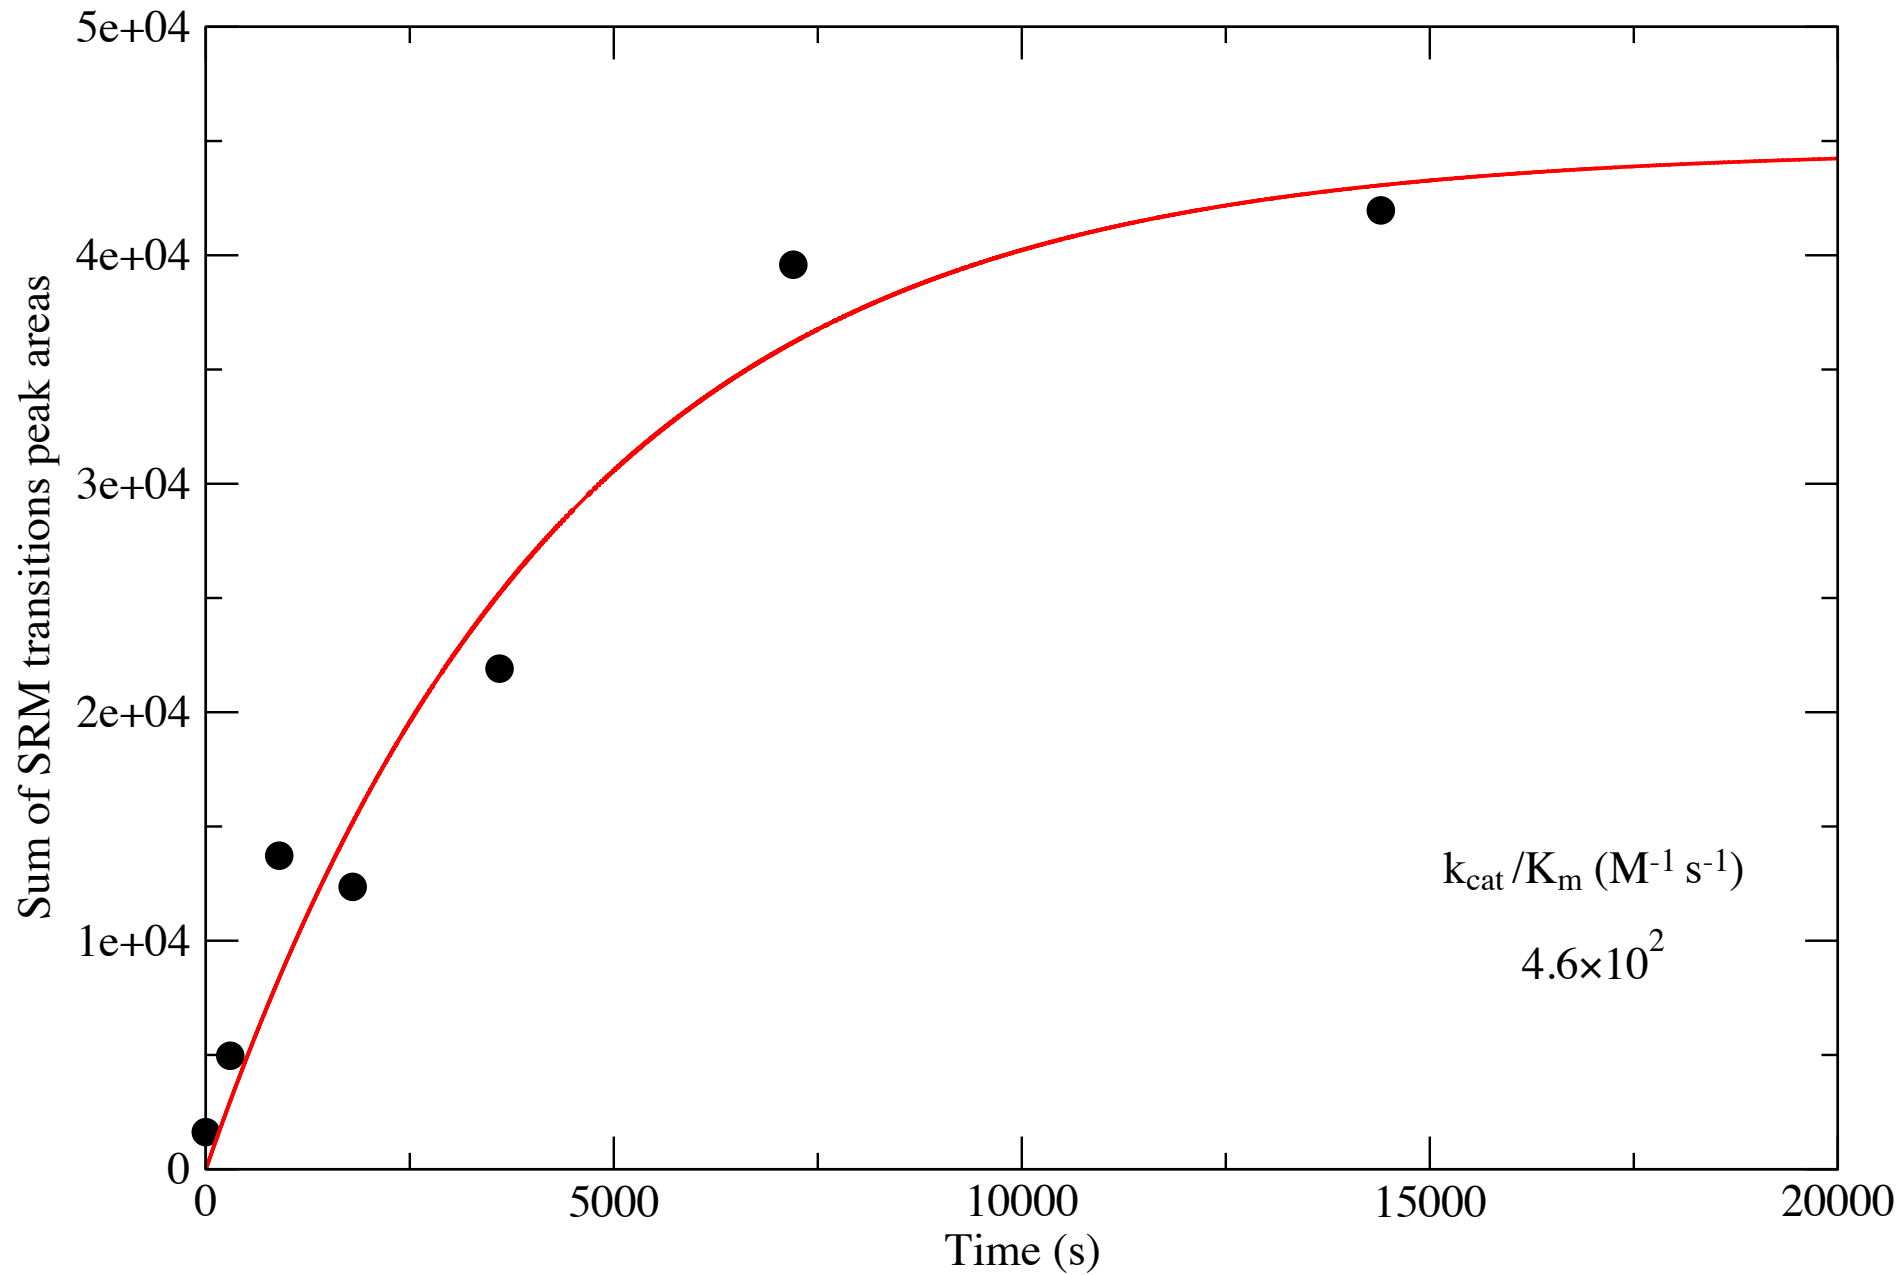

# LARP4\_HUMAN (GLNQTTIPVSPPSTTKPSR)

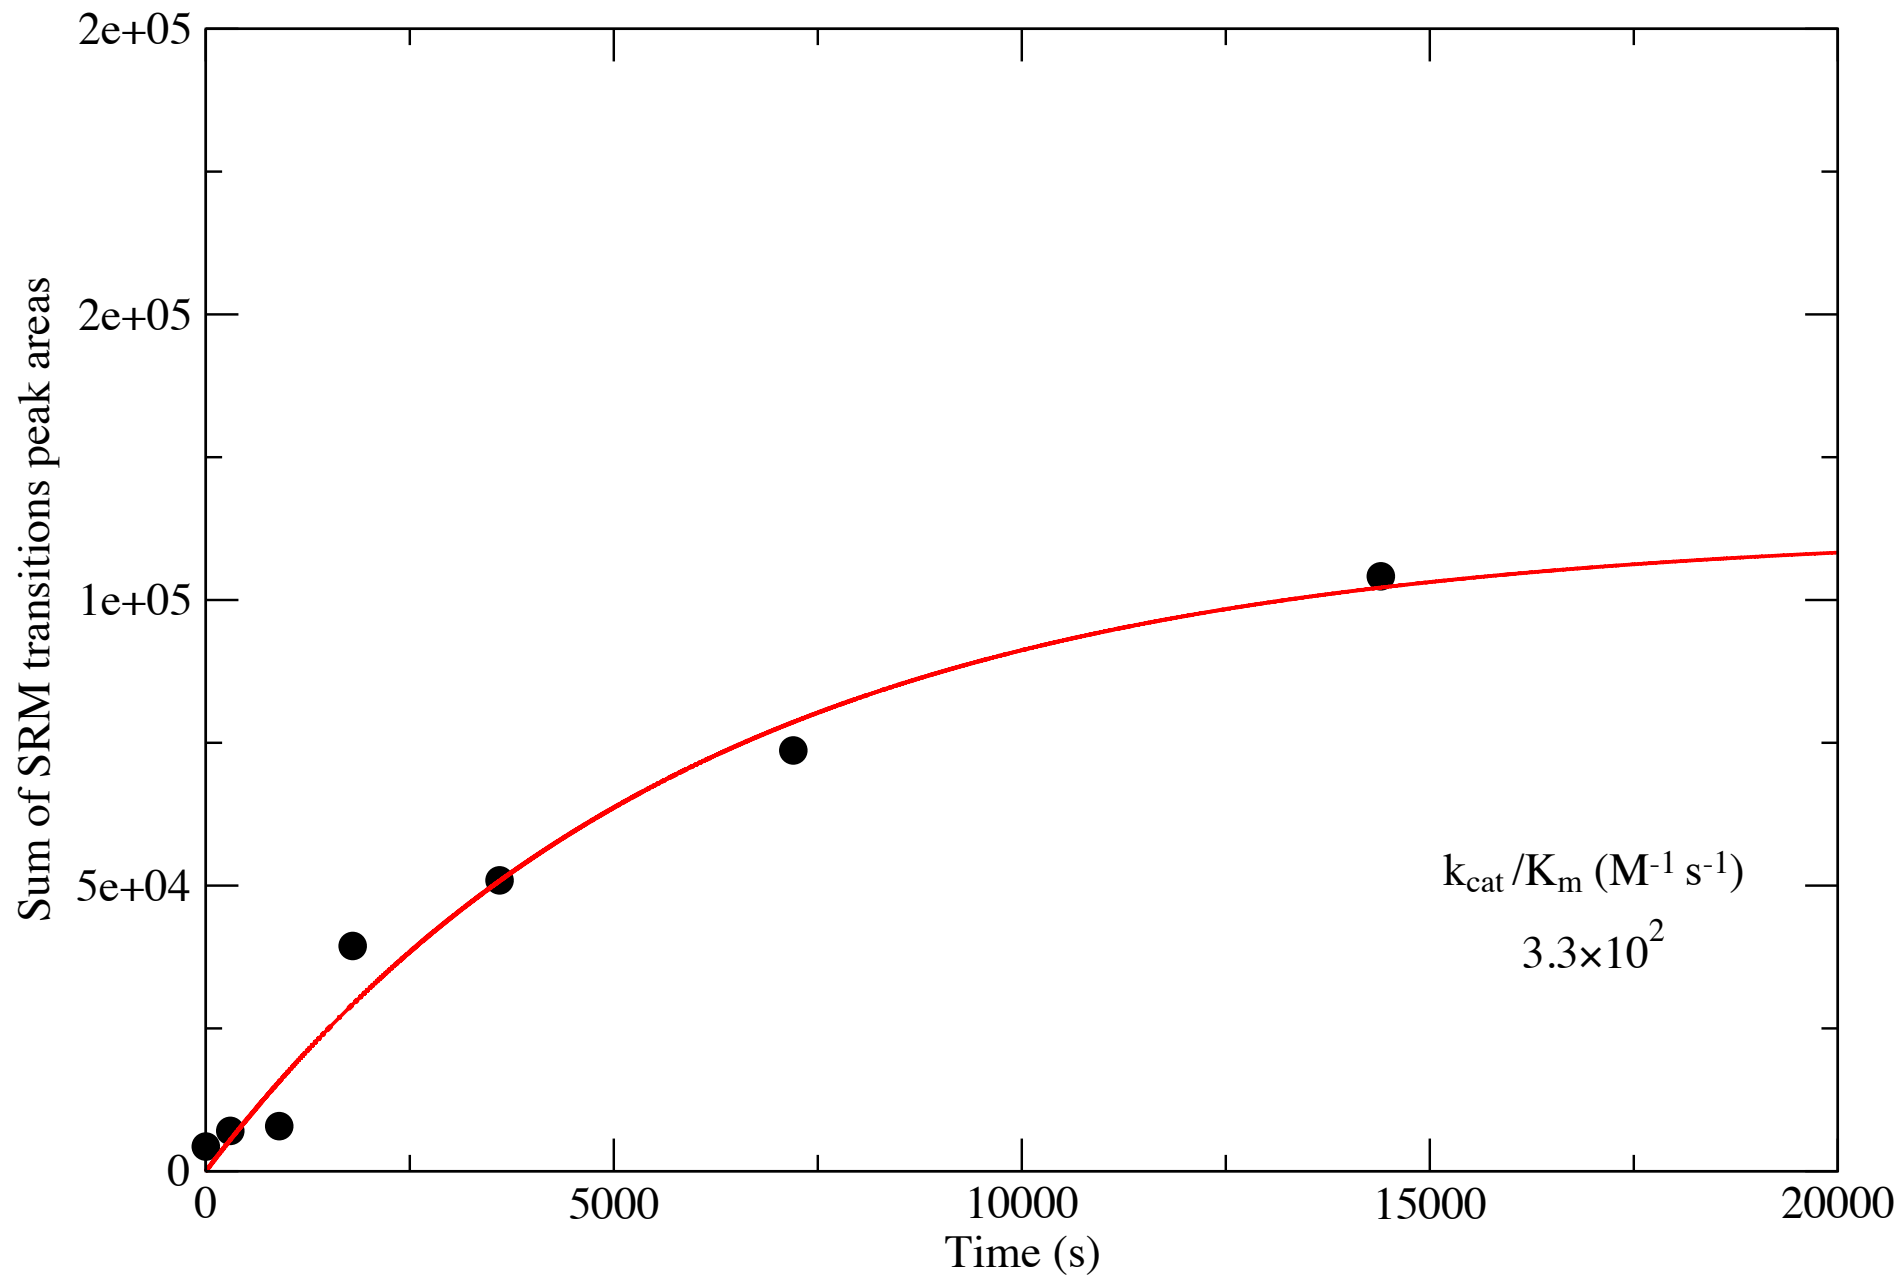

# LMTK2\_HUMAN (SVLADDILASR)

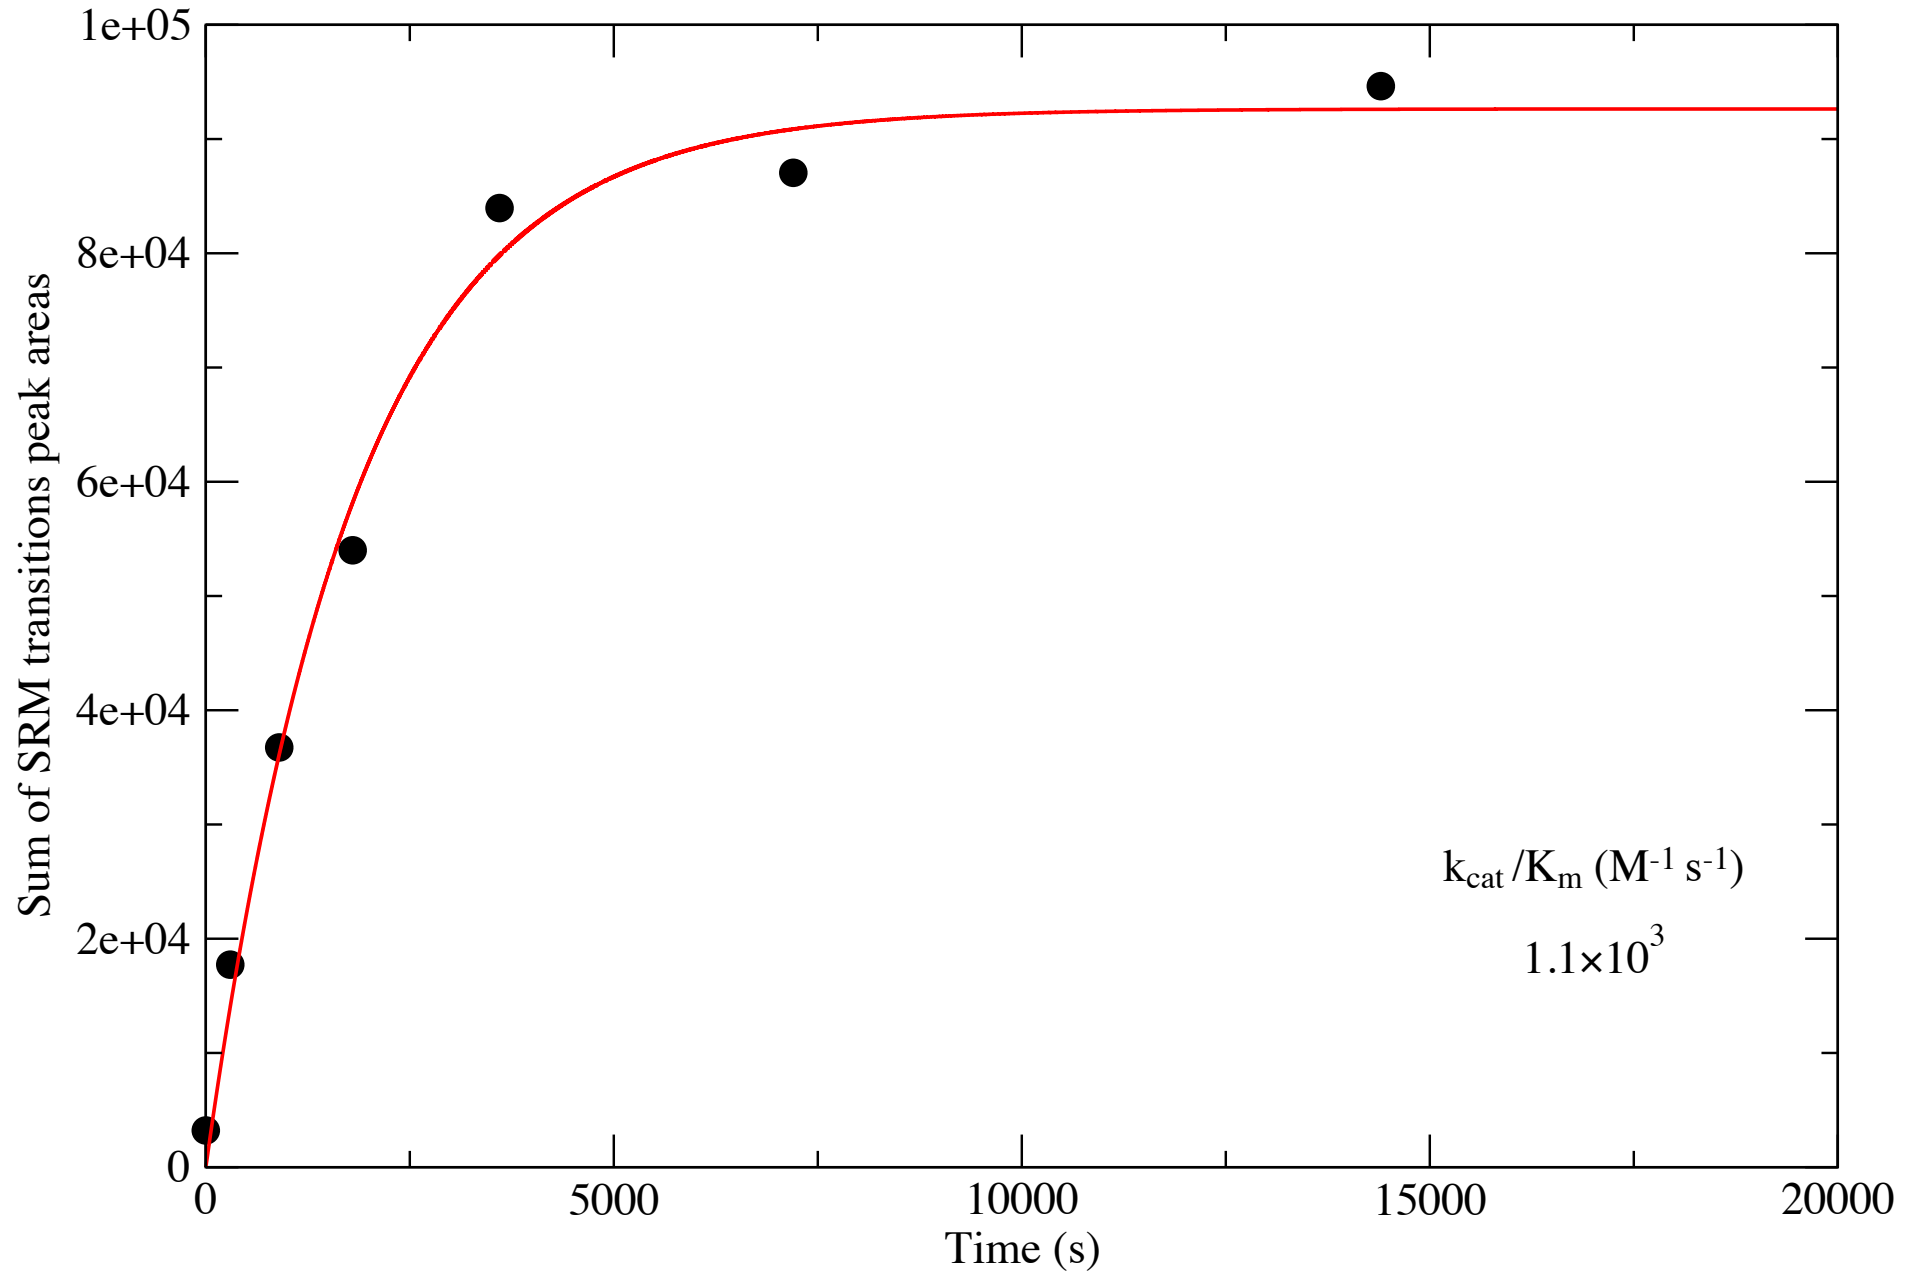

# LPPRC\_HUMAN (YVIPCFDSVNSAR)

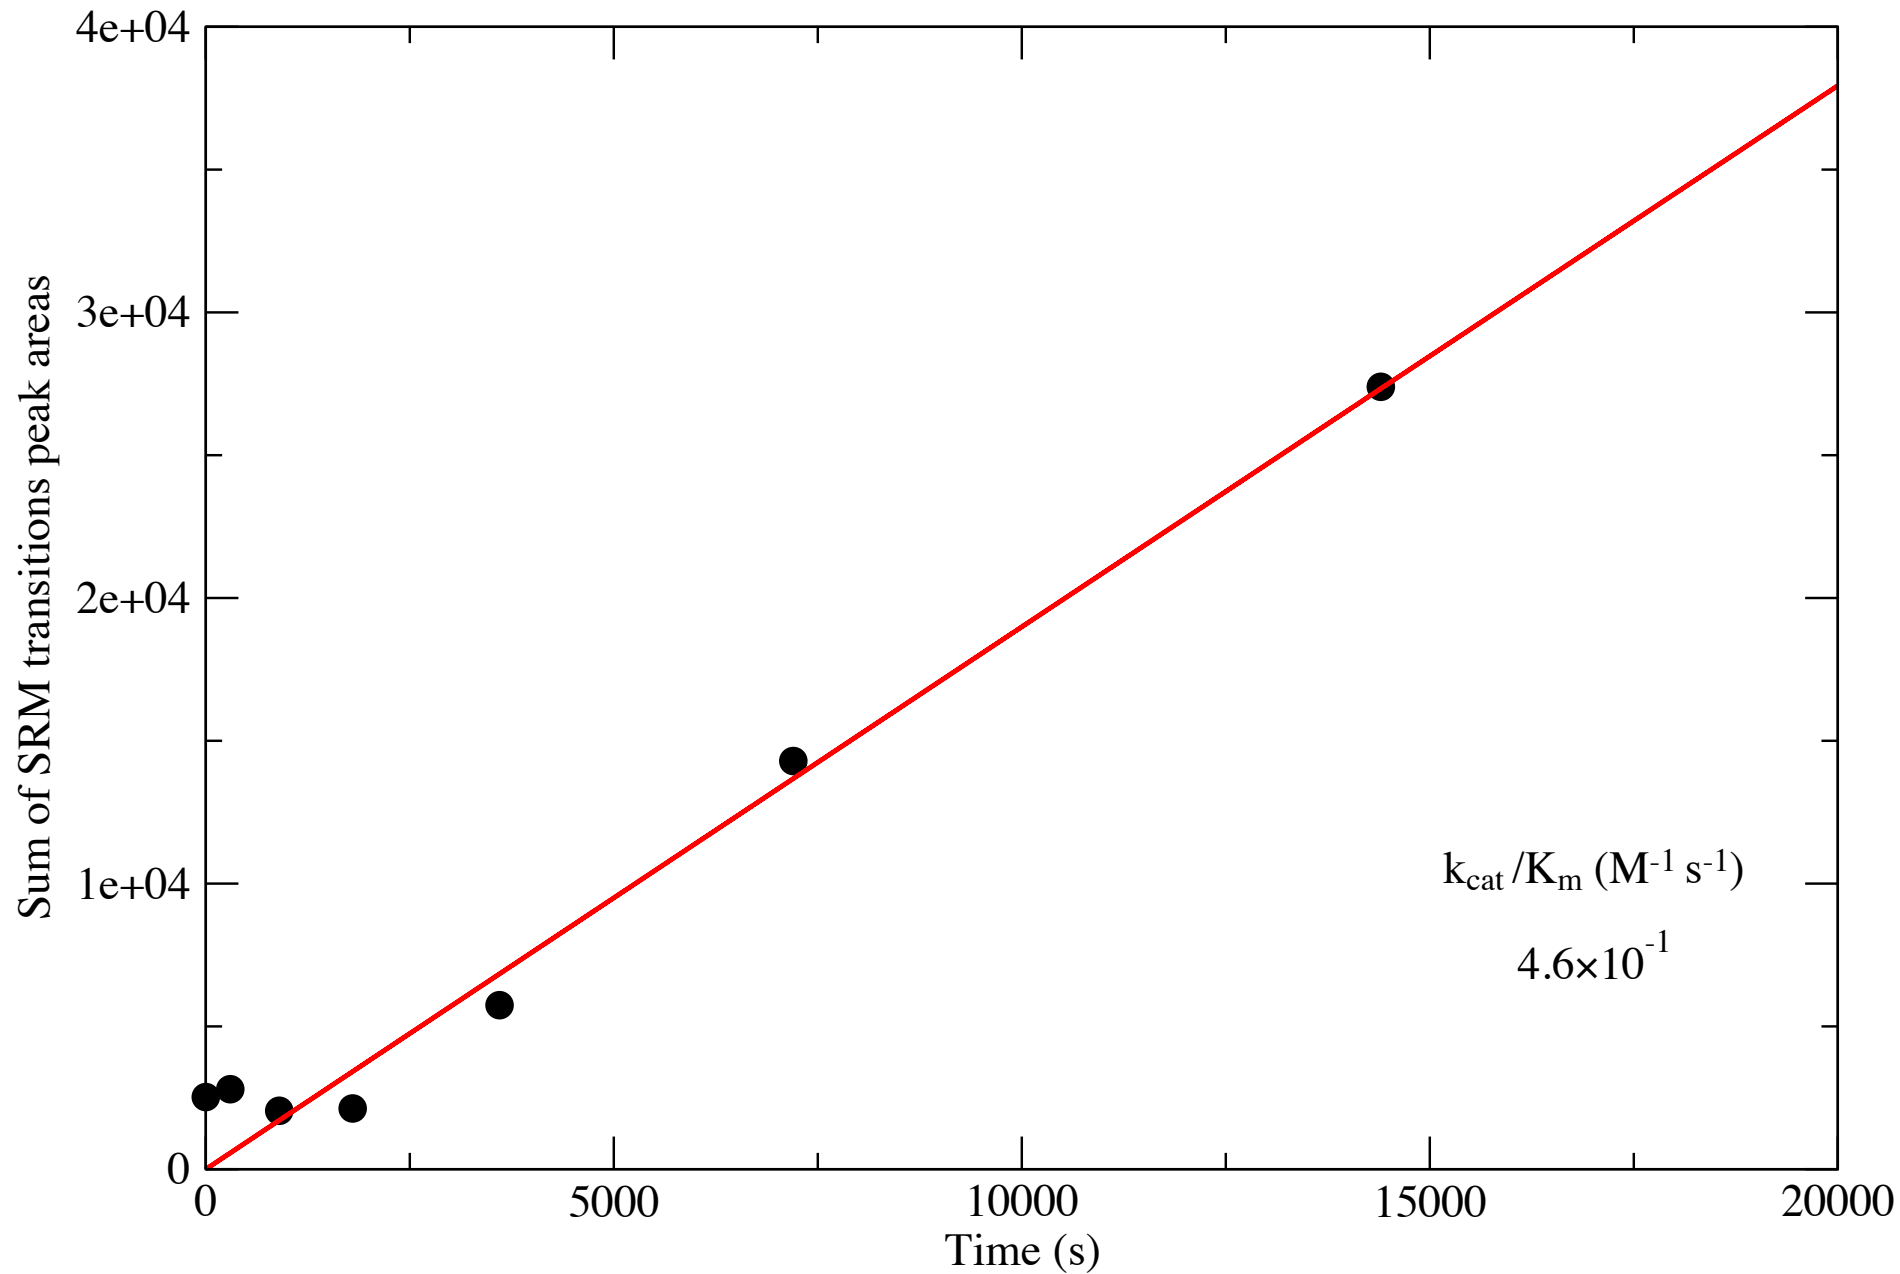

# LPXN\_HUMAN (ALLEELER)

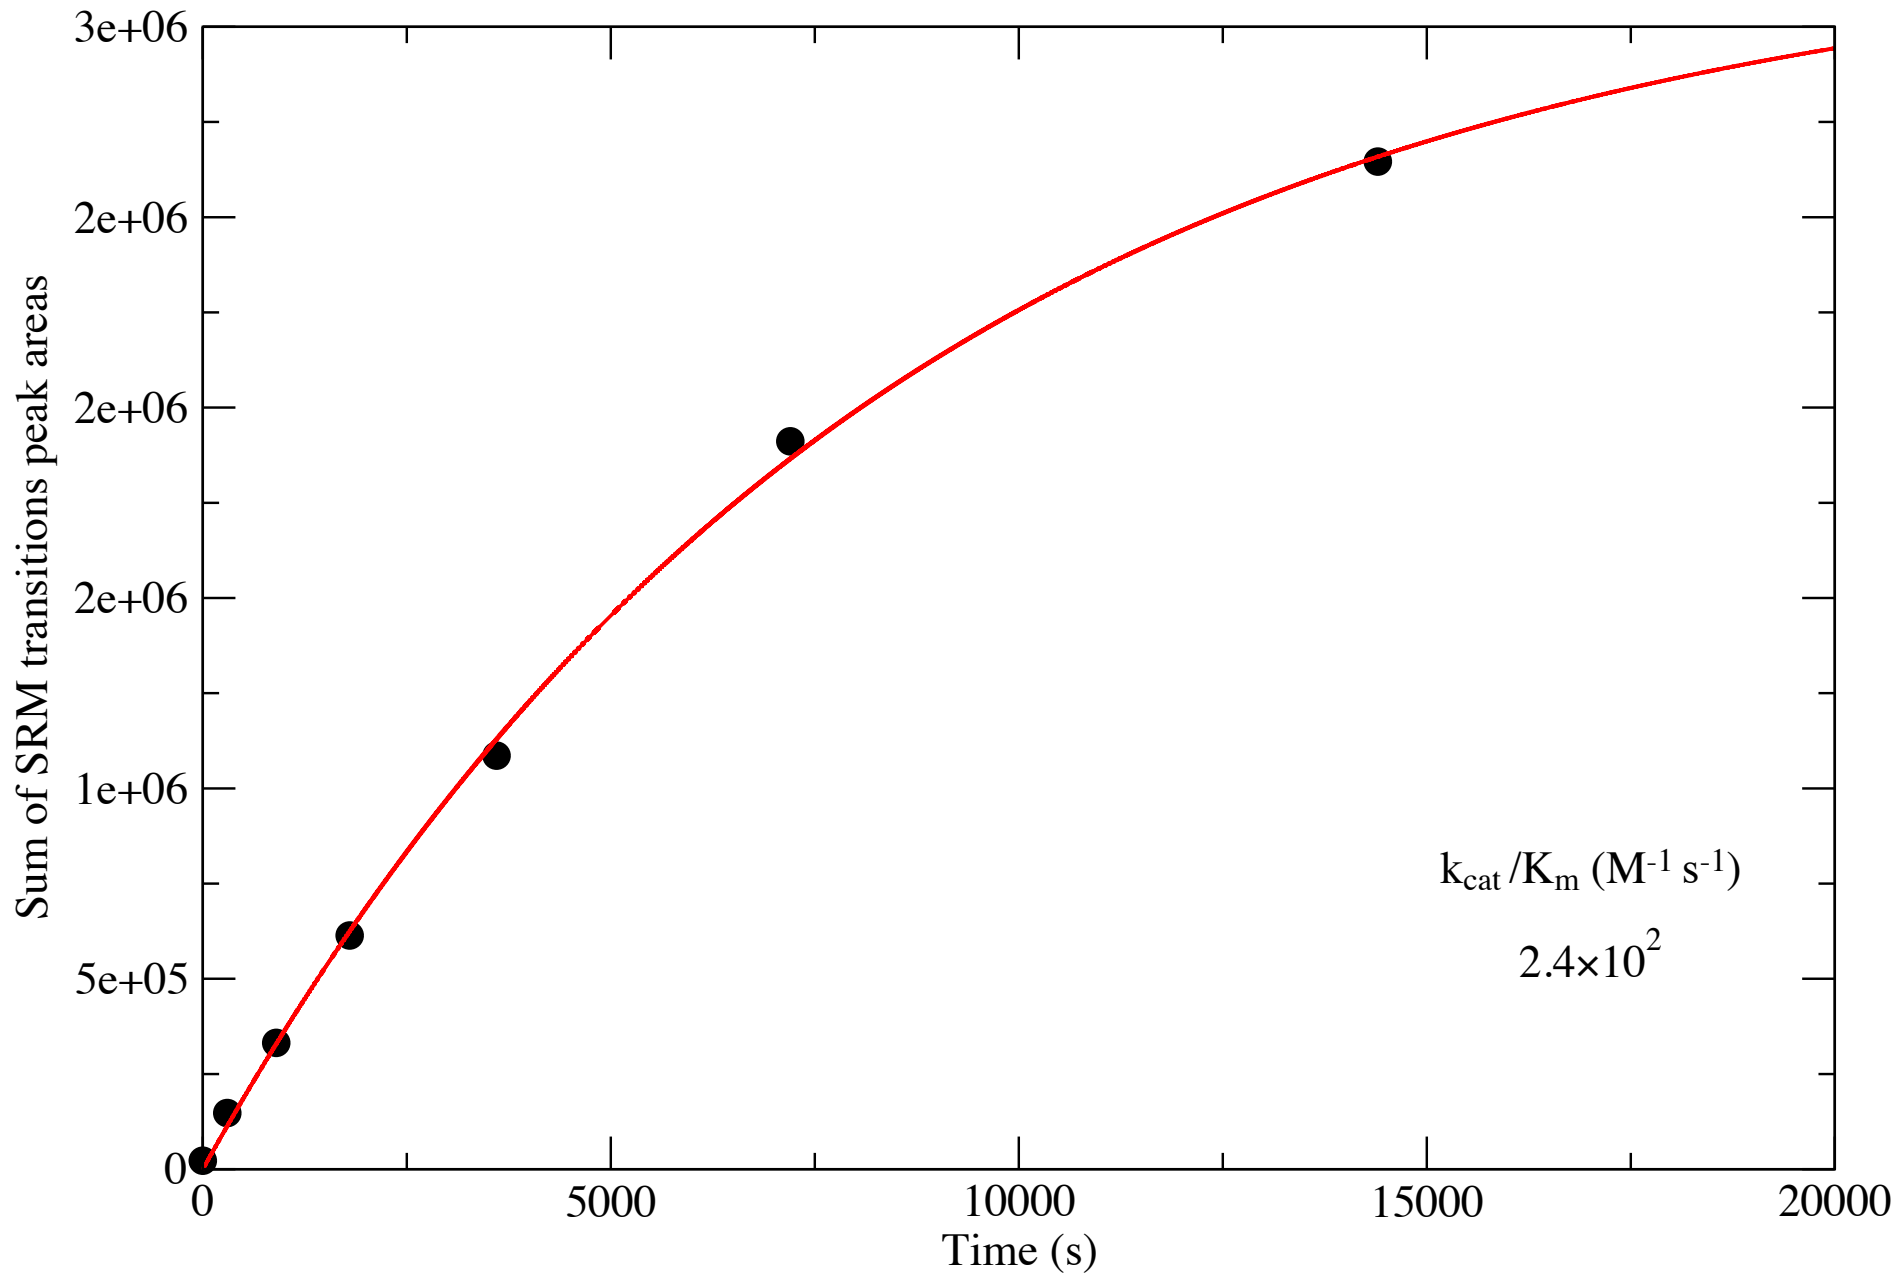



# LRC47\_HUMAN (AVSGQLPDPTTNPSAGK)

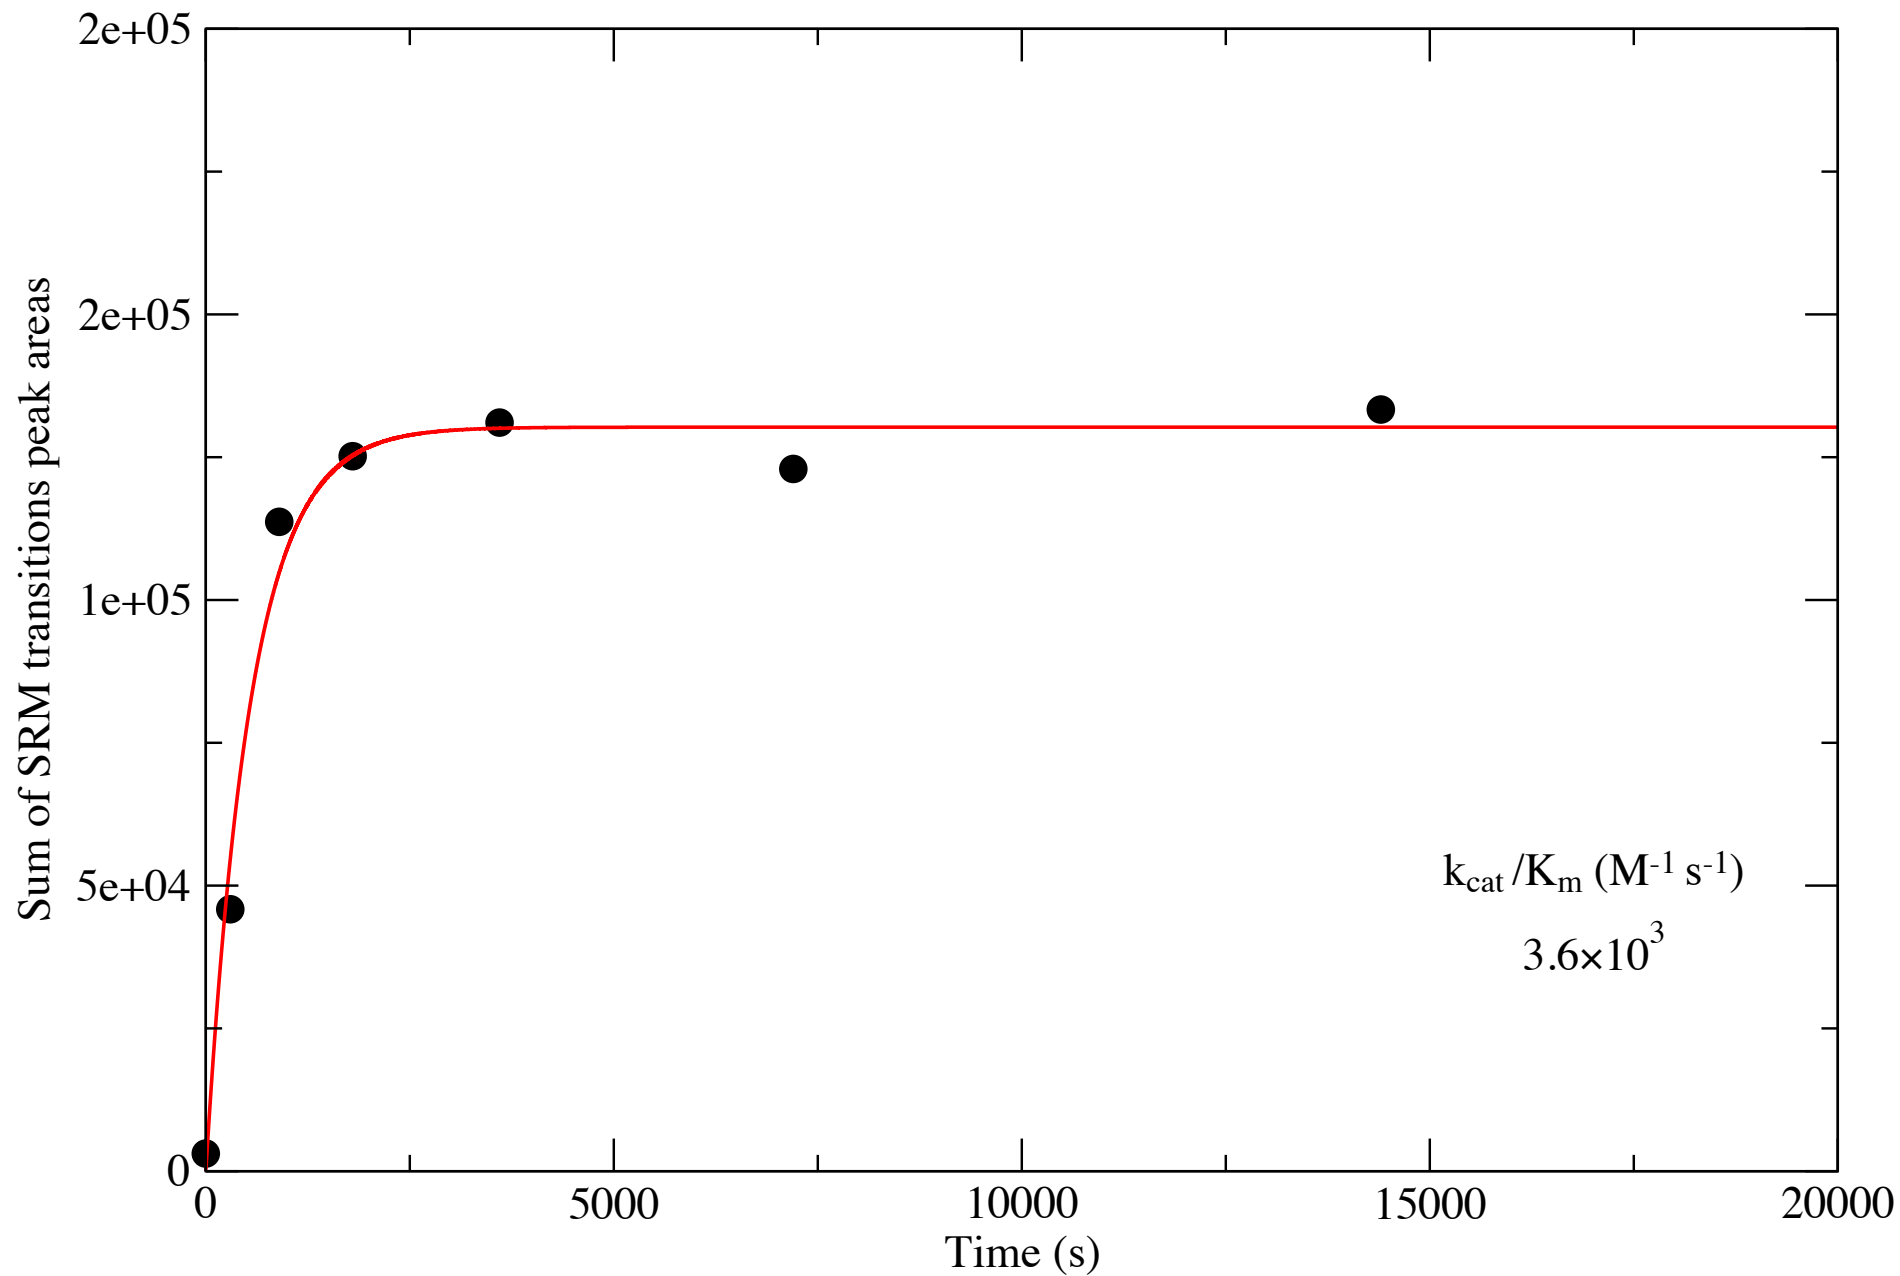

# LSM11\_HUMAN (GSSVGGTFSR)

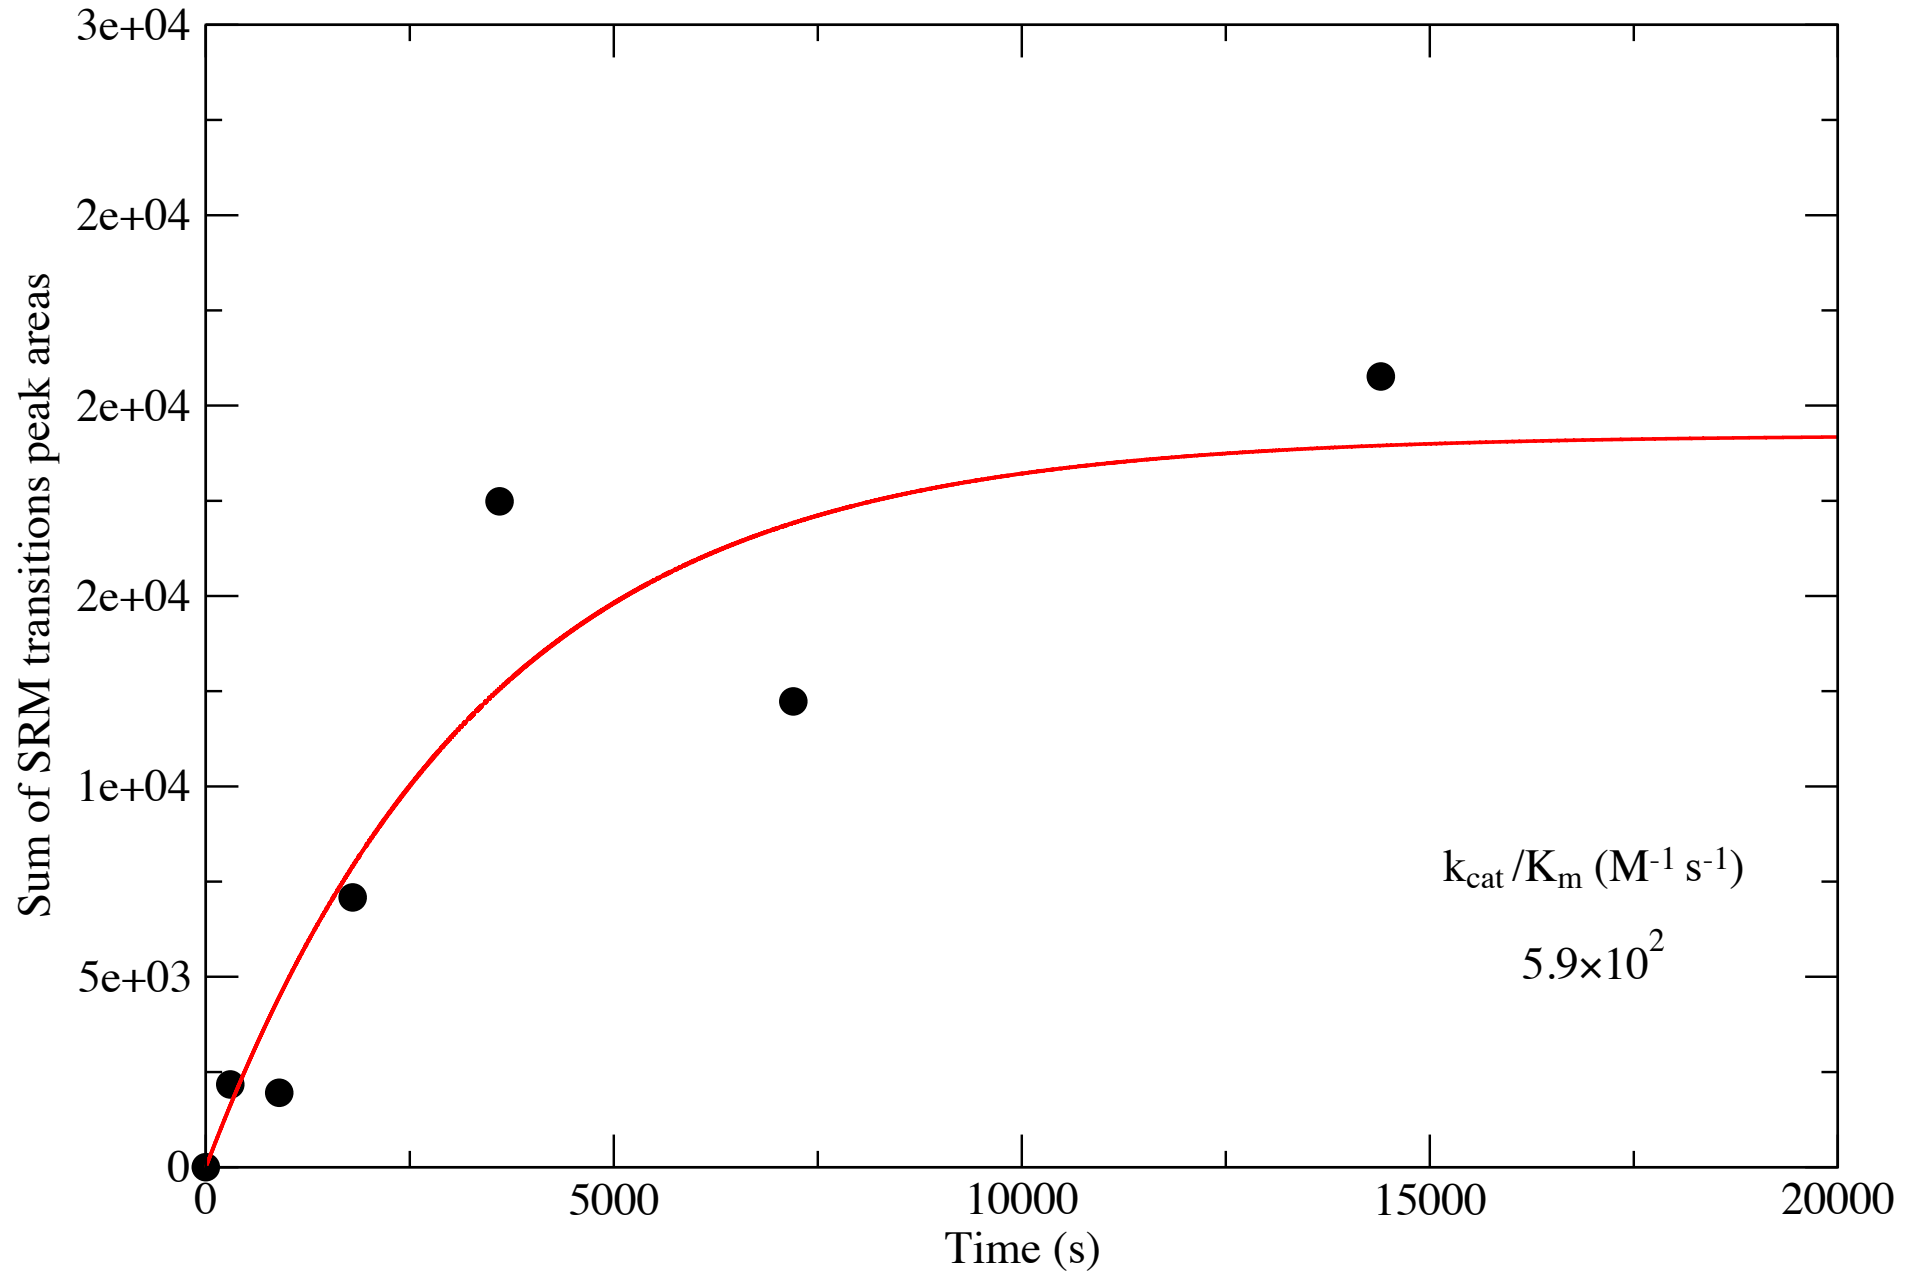

# MADD\_HUMAN (SVIGVSPAVMIR)

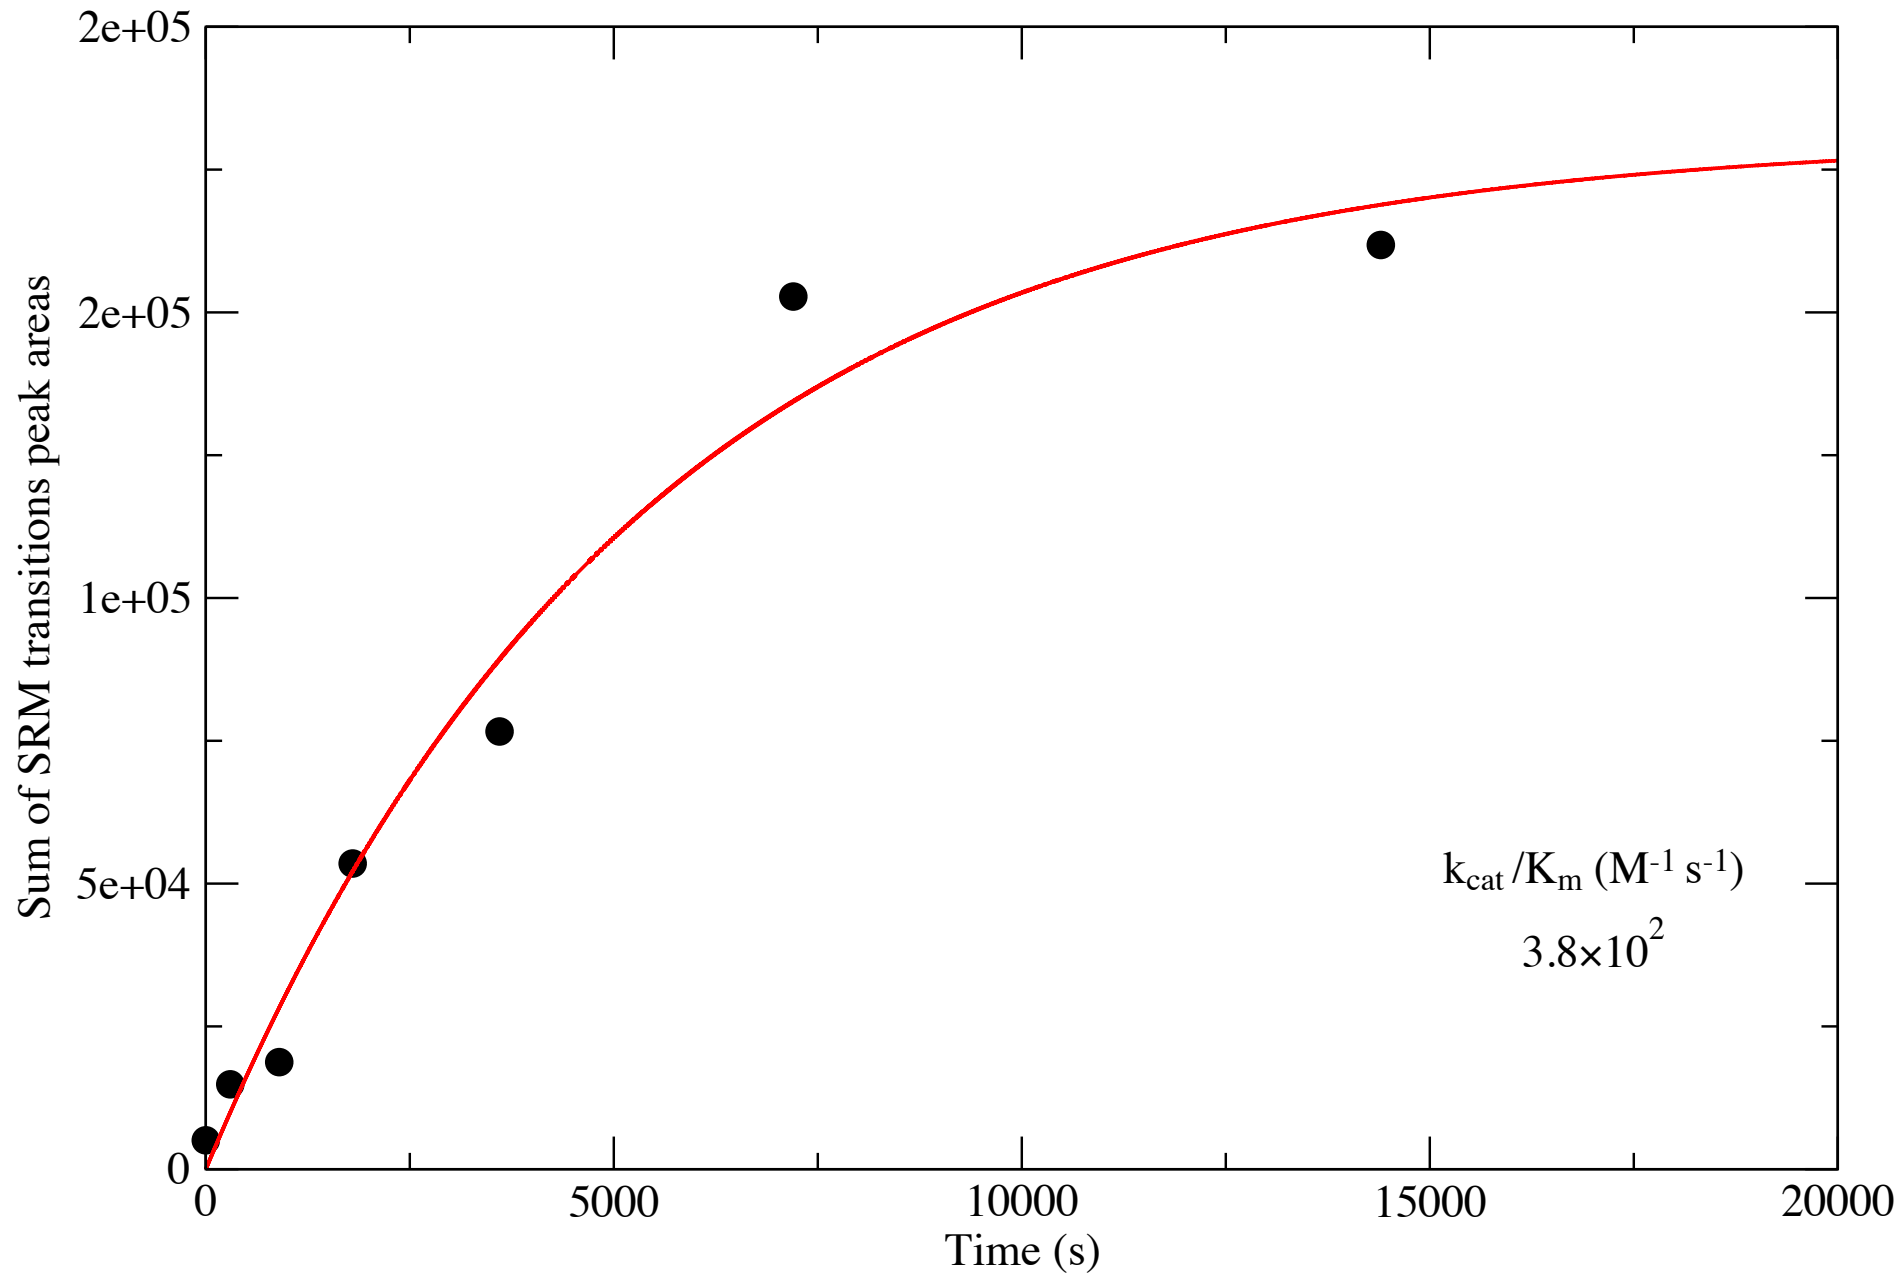

# MAGD1\_HUMAN (GATAQTSADGSQAQNLESR)

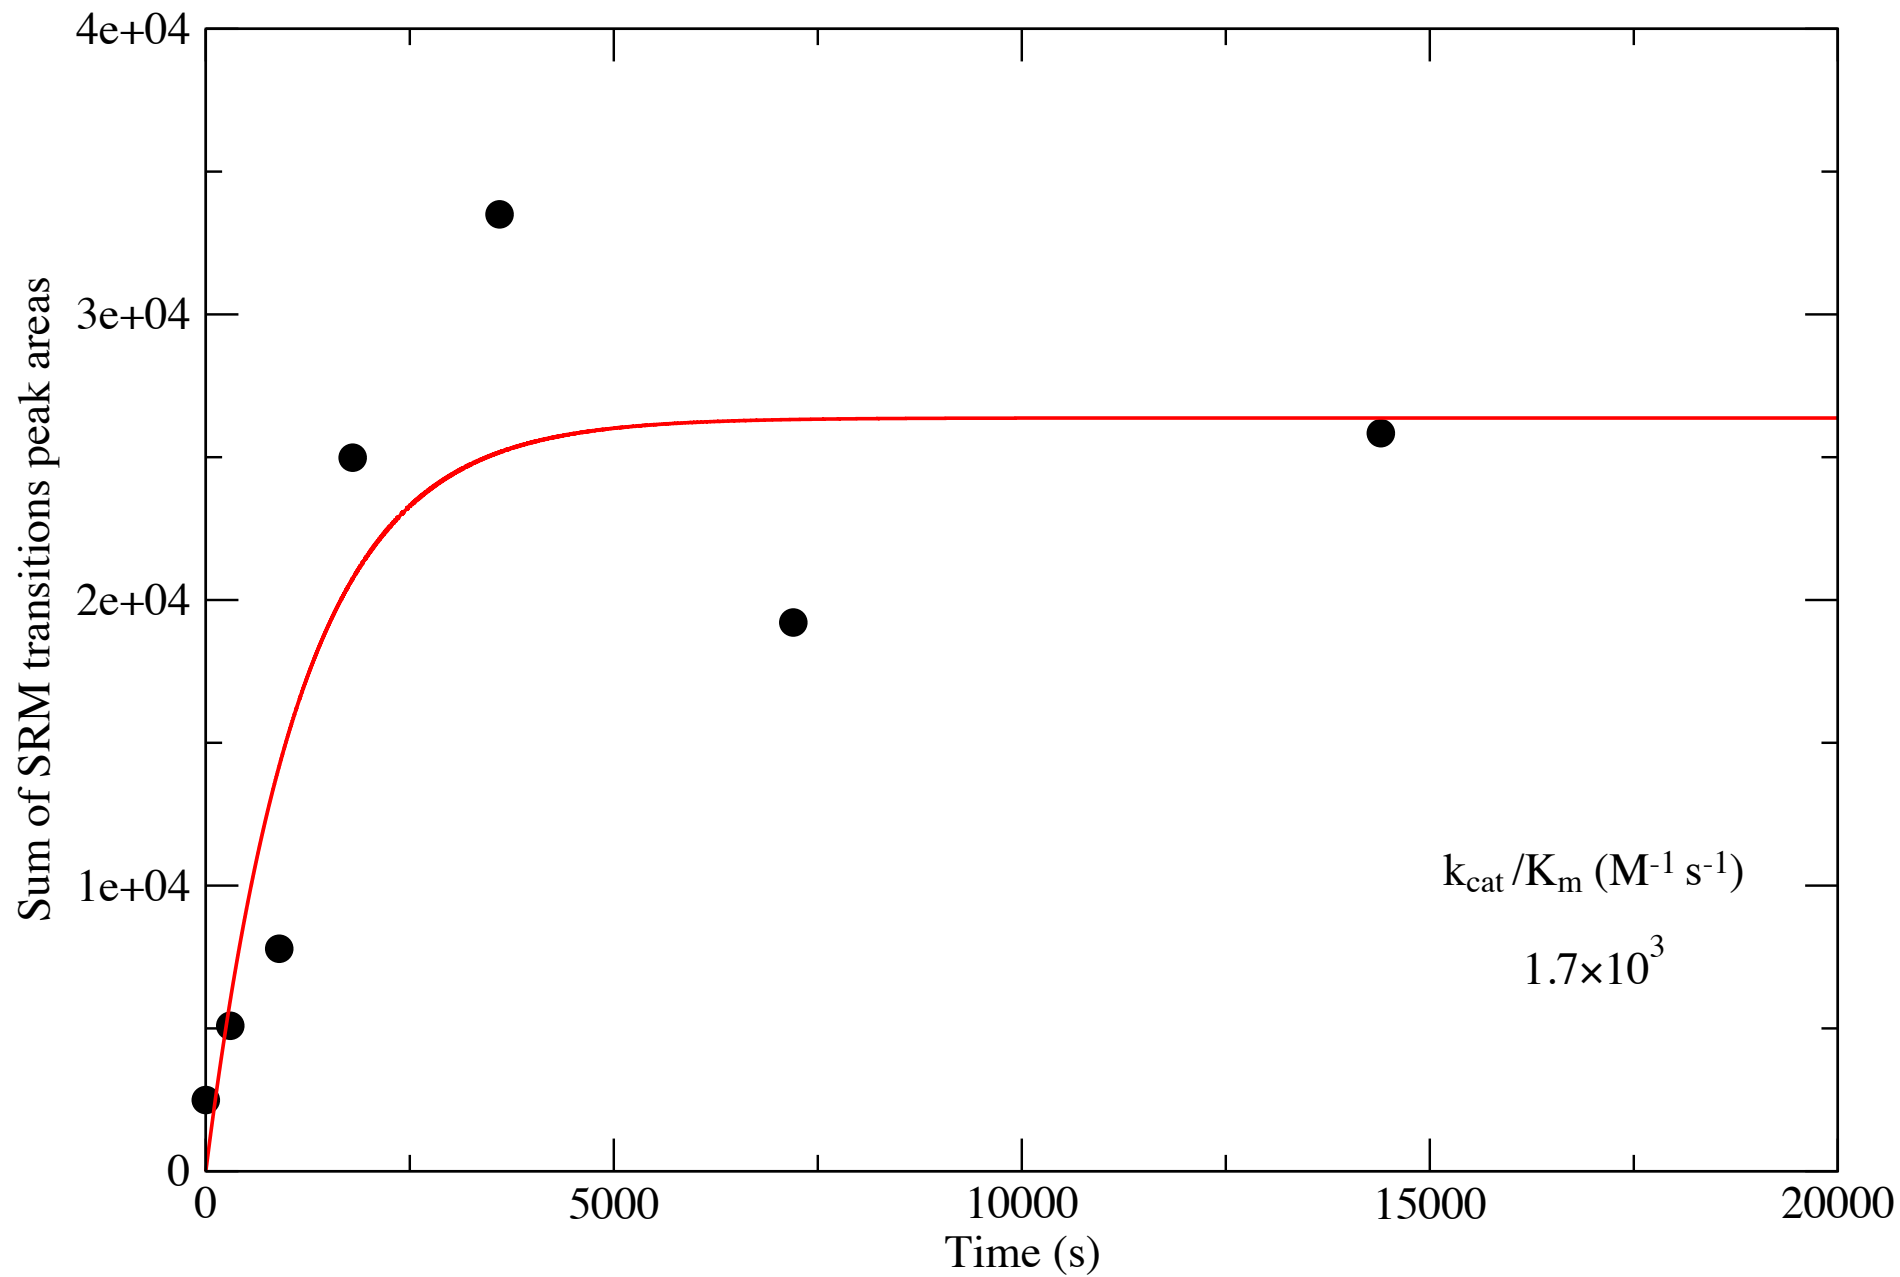

# MAGG1\_HUMAN (GFAEEAPSTSRGPGGSQGSQGPSPQGAR)

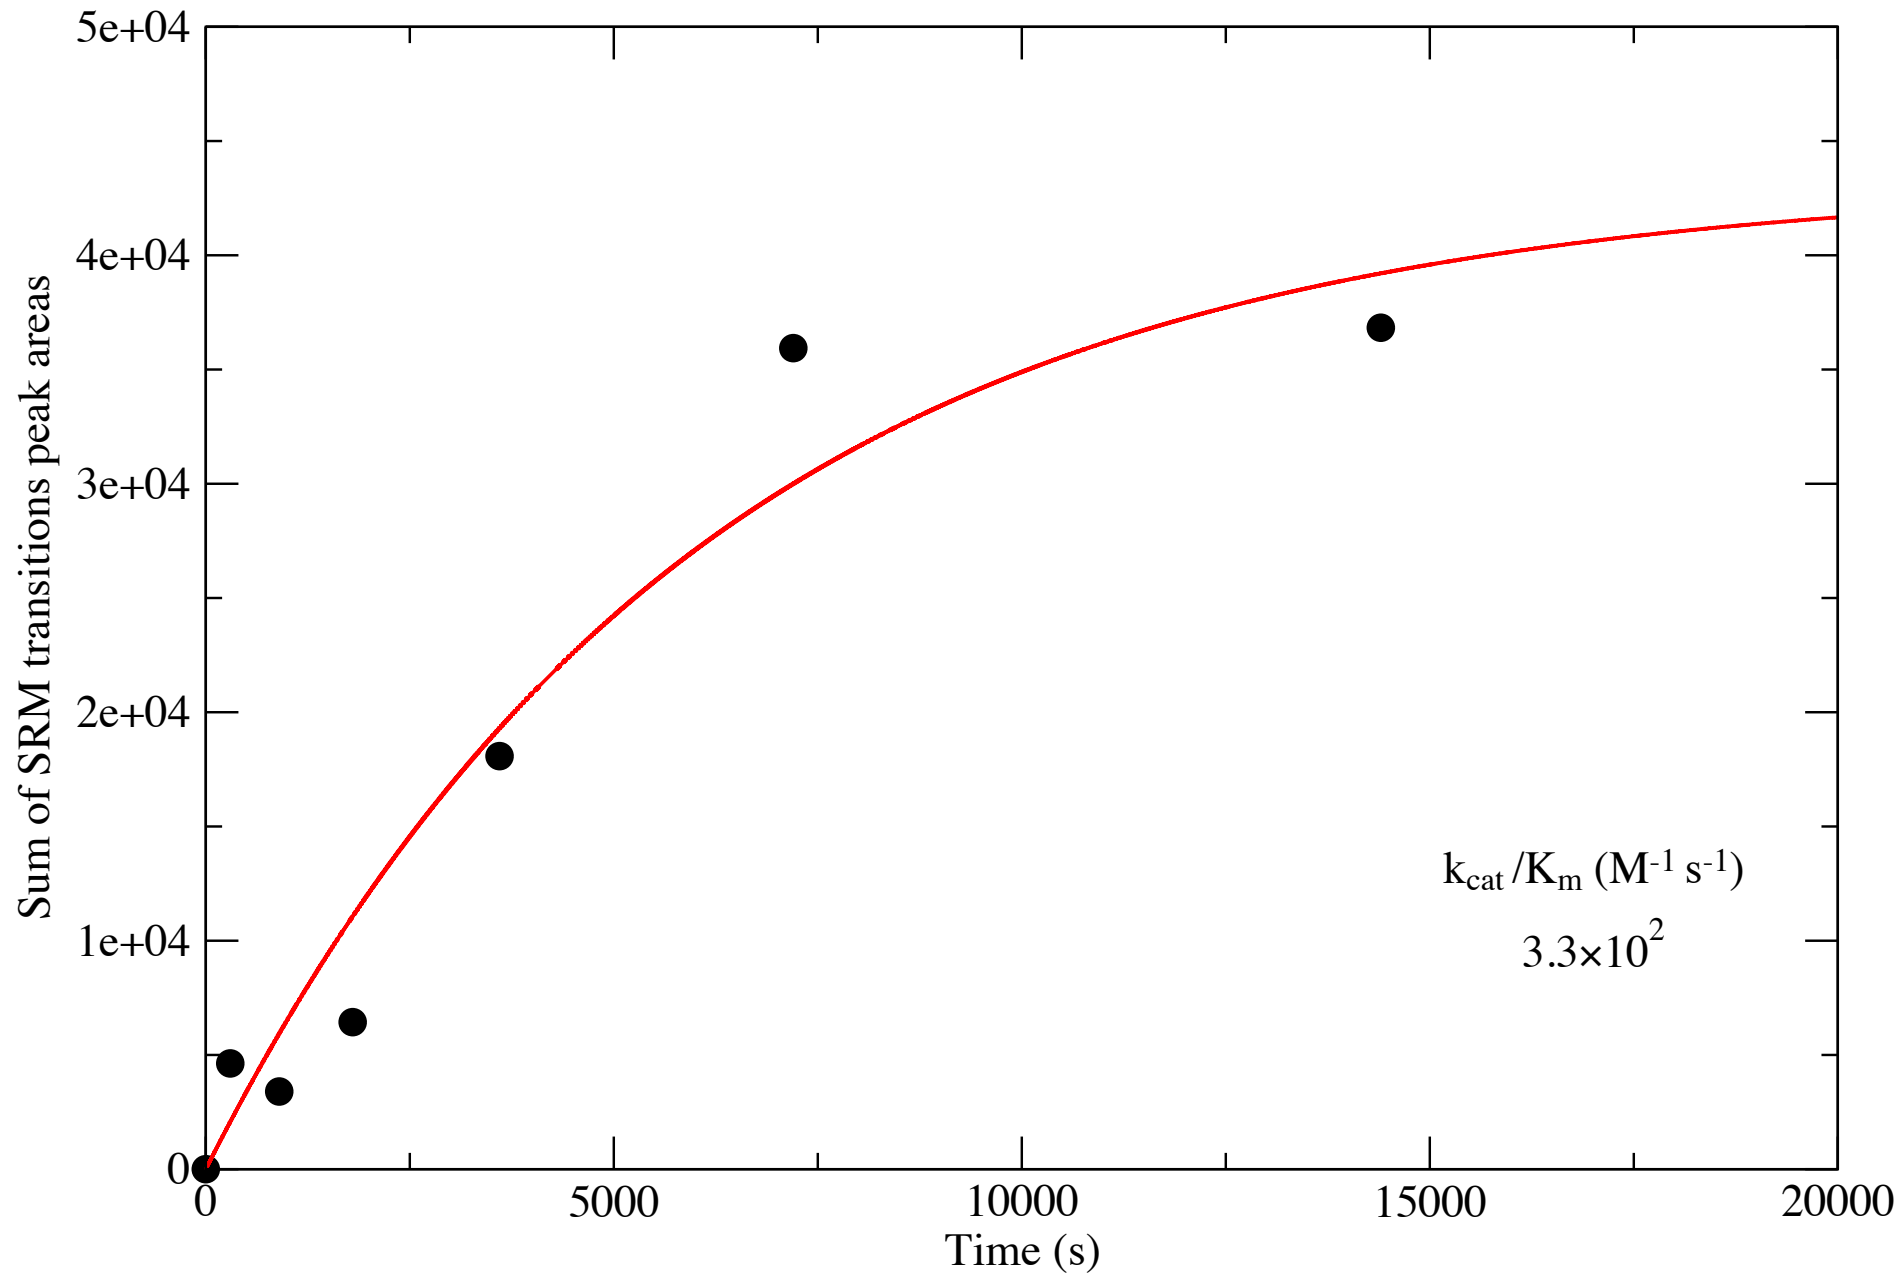

# MAP11\_HUMAN (GCSSEAKLQCPTCIK)

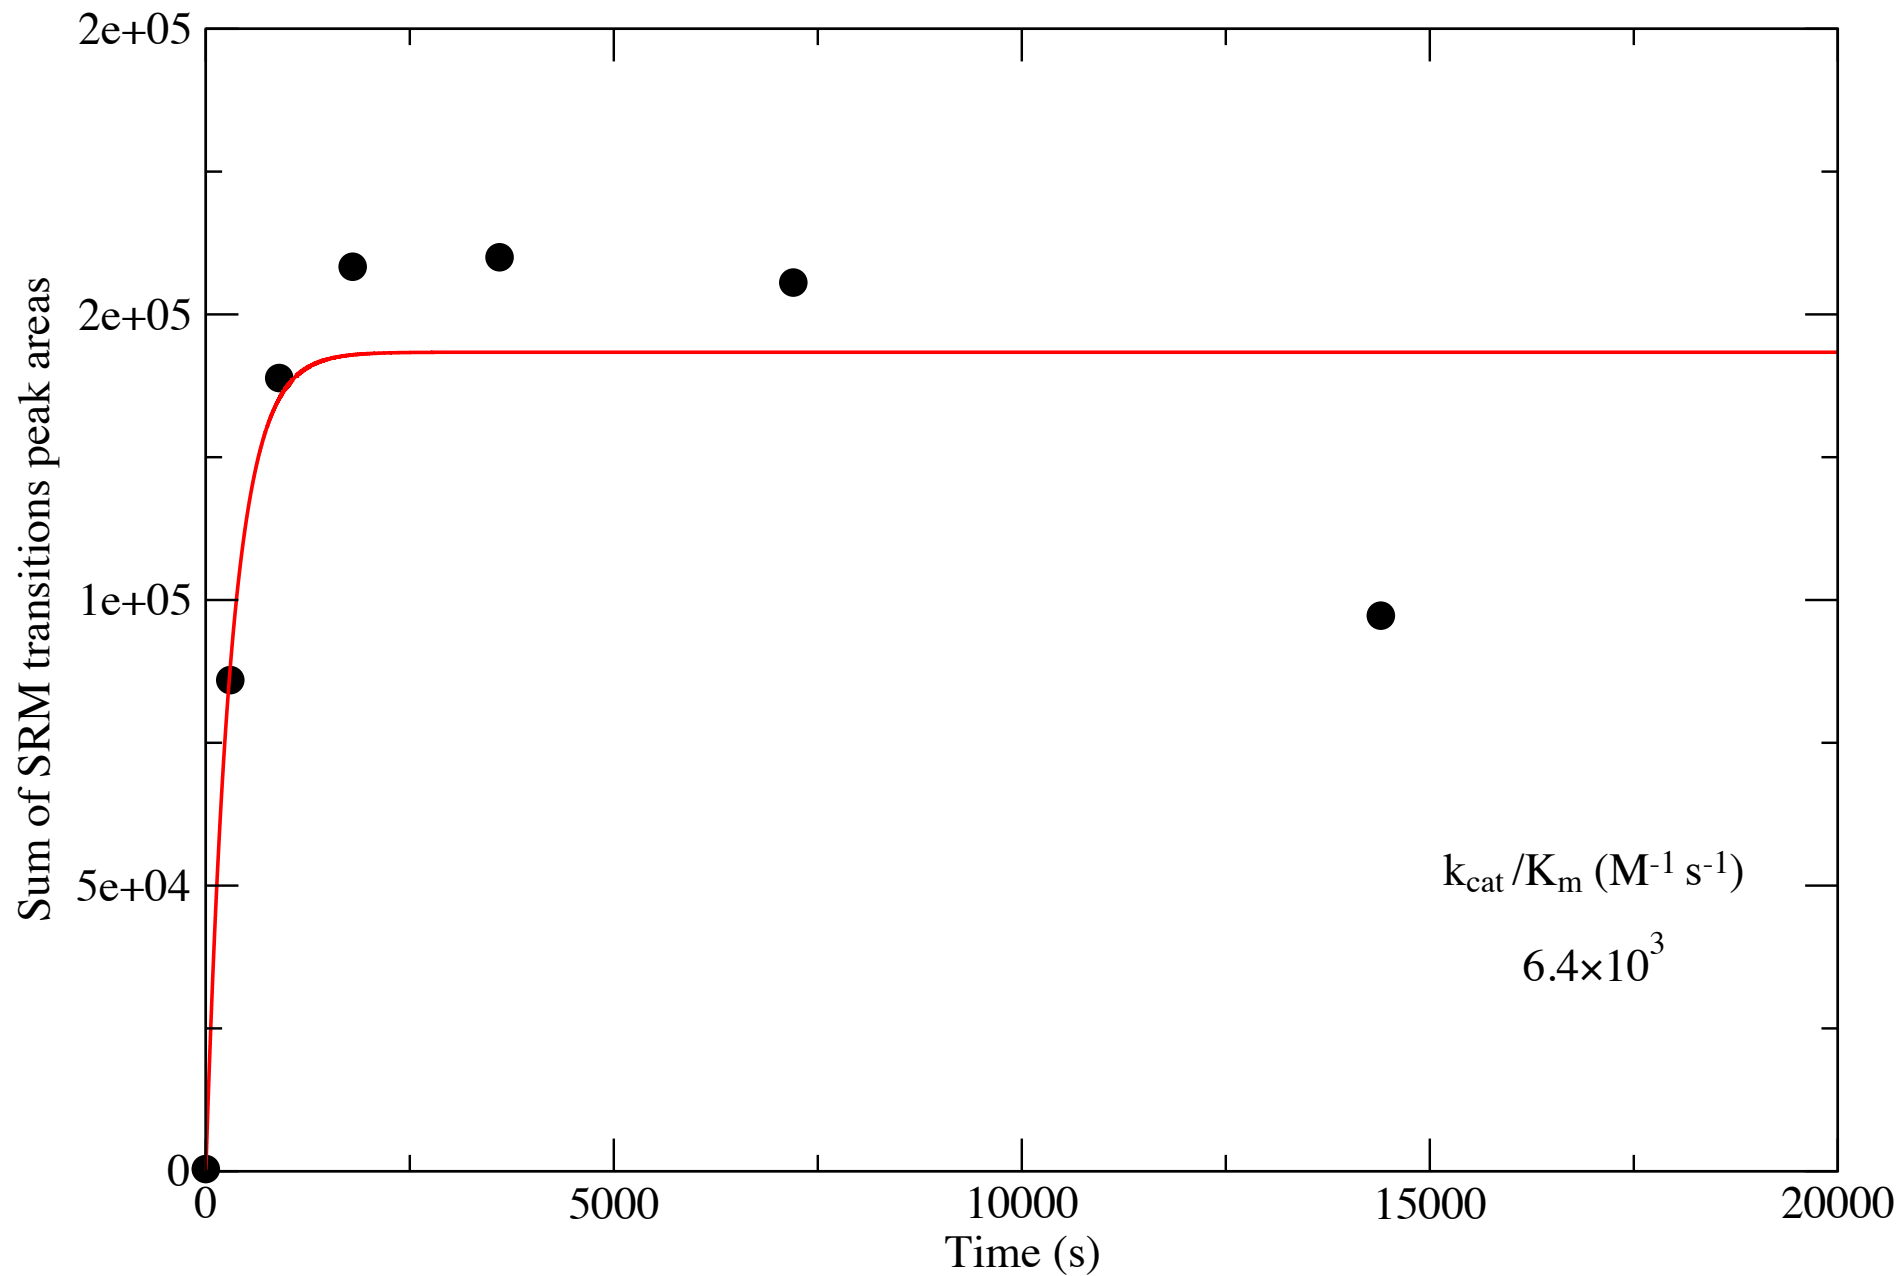

# MCFD2\_HUMAN (GYIDYAEFAK)

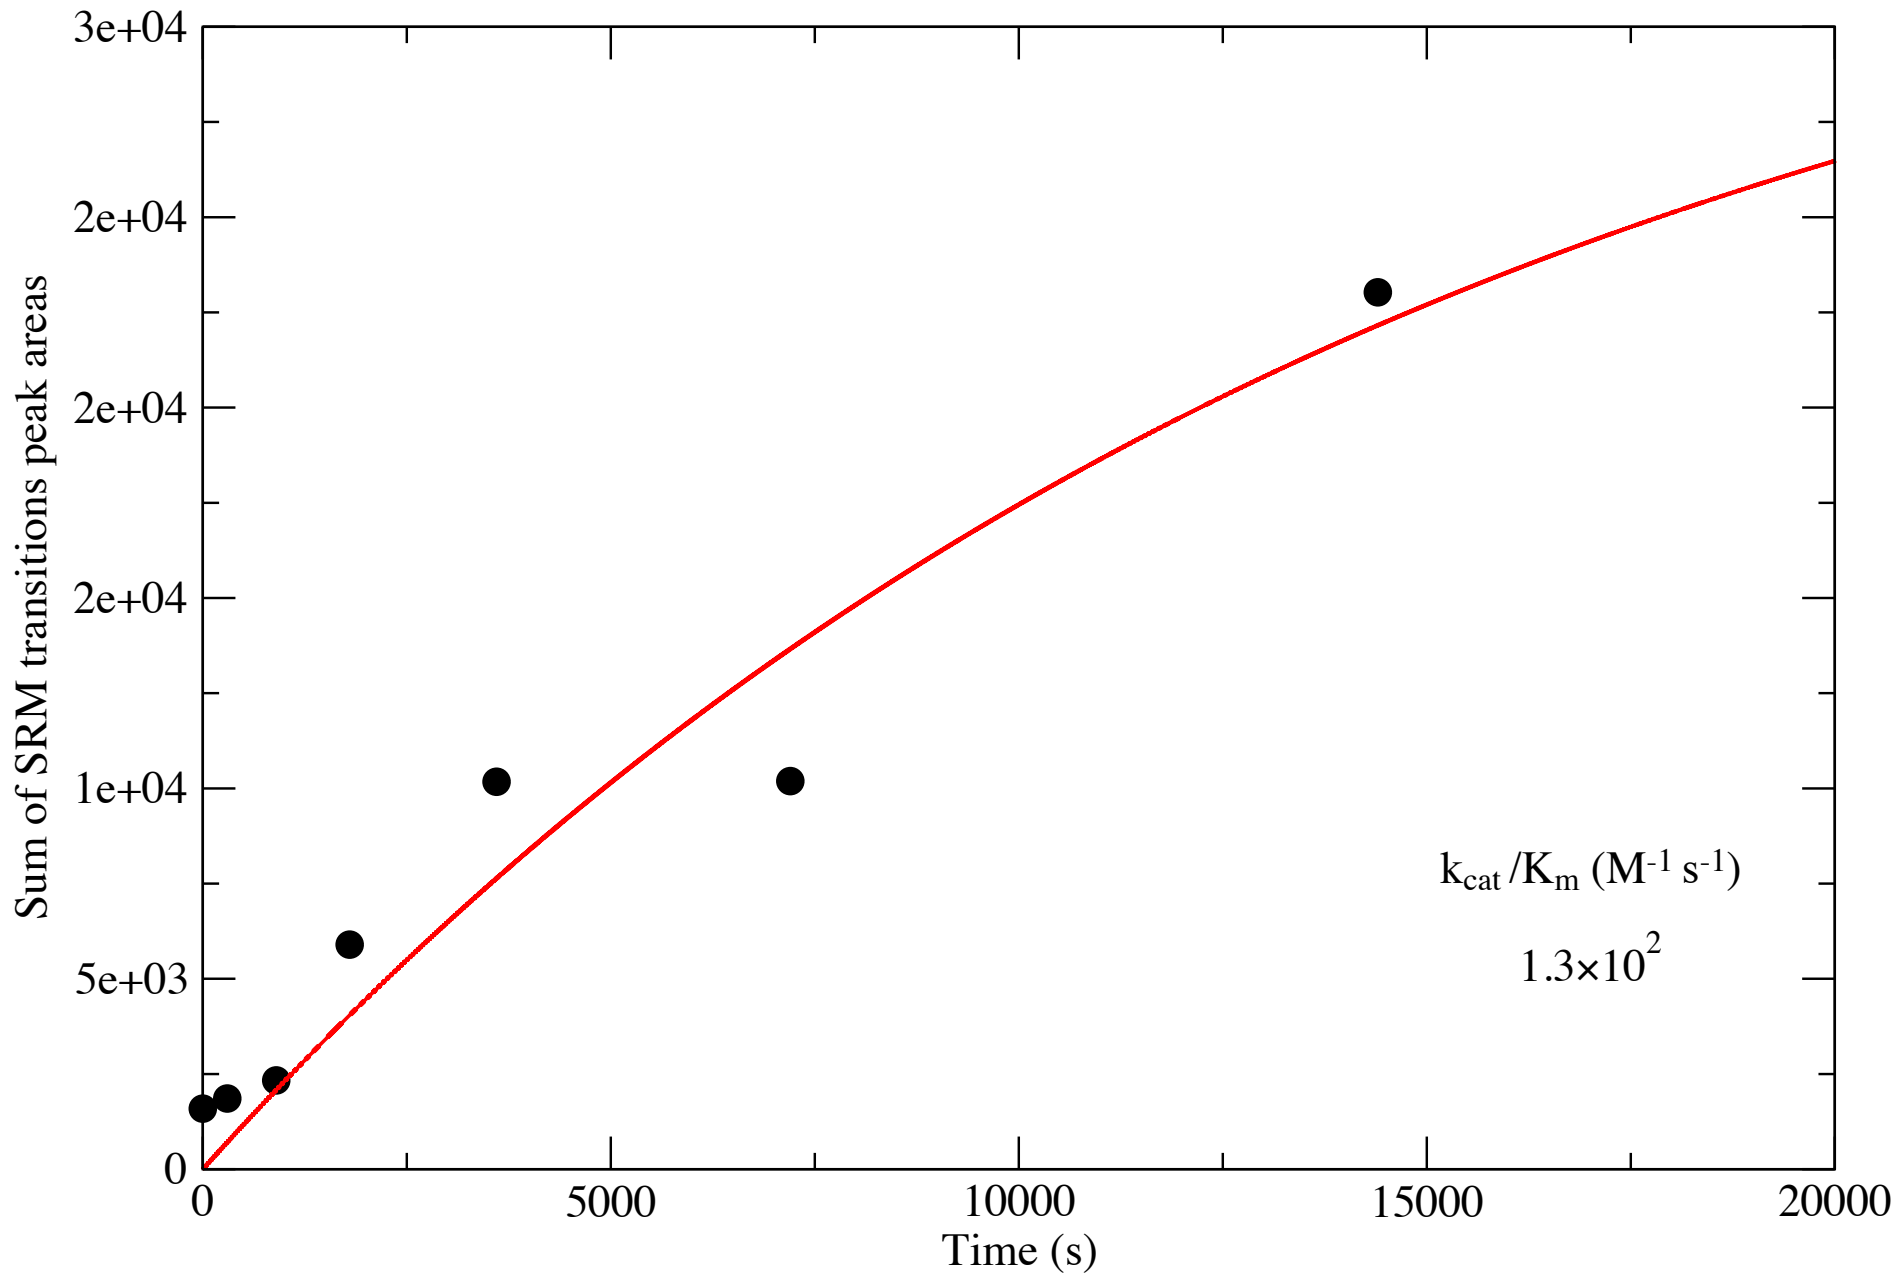

# MCM2\_HUMAN (GEELIGDGMERDYR)

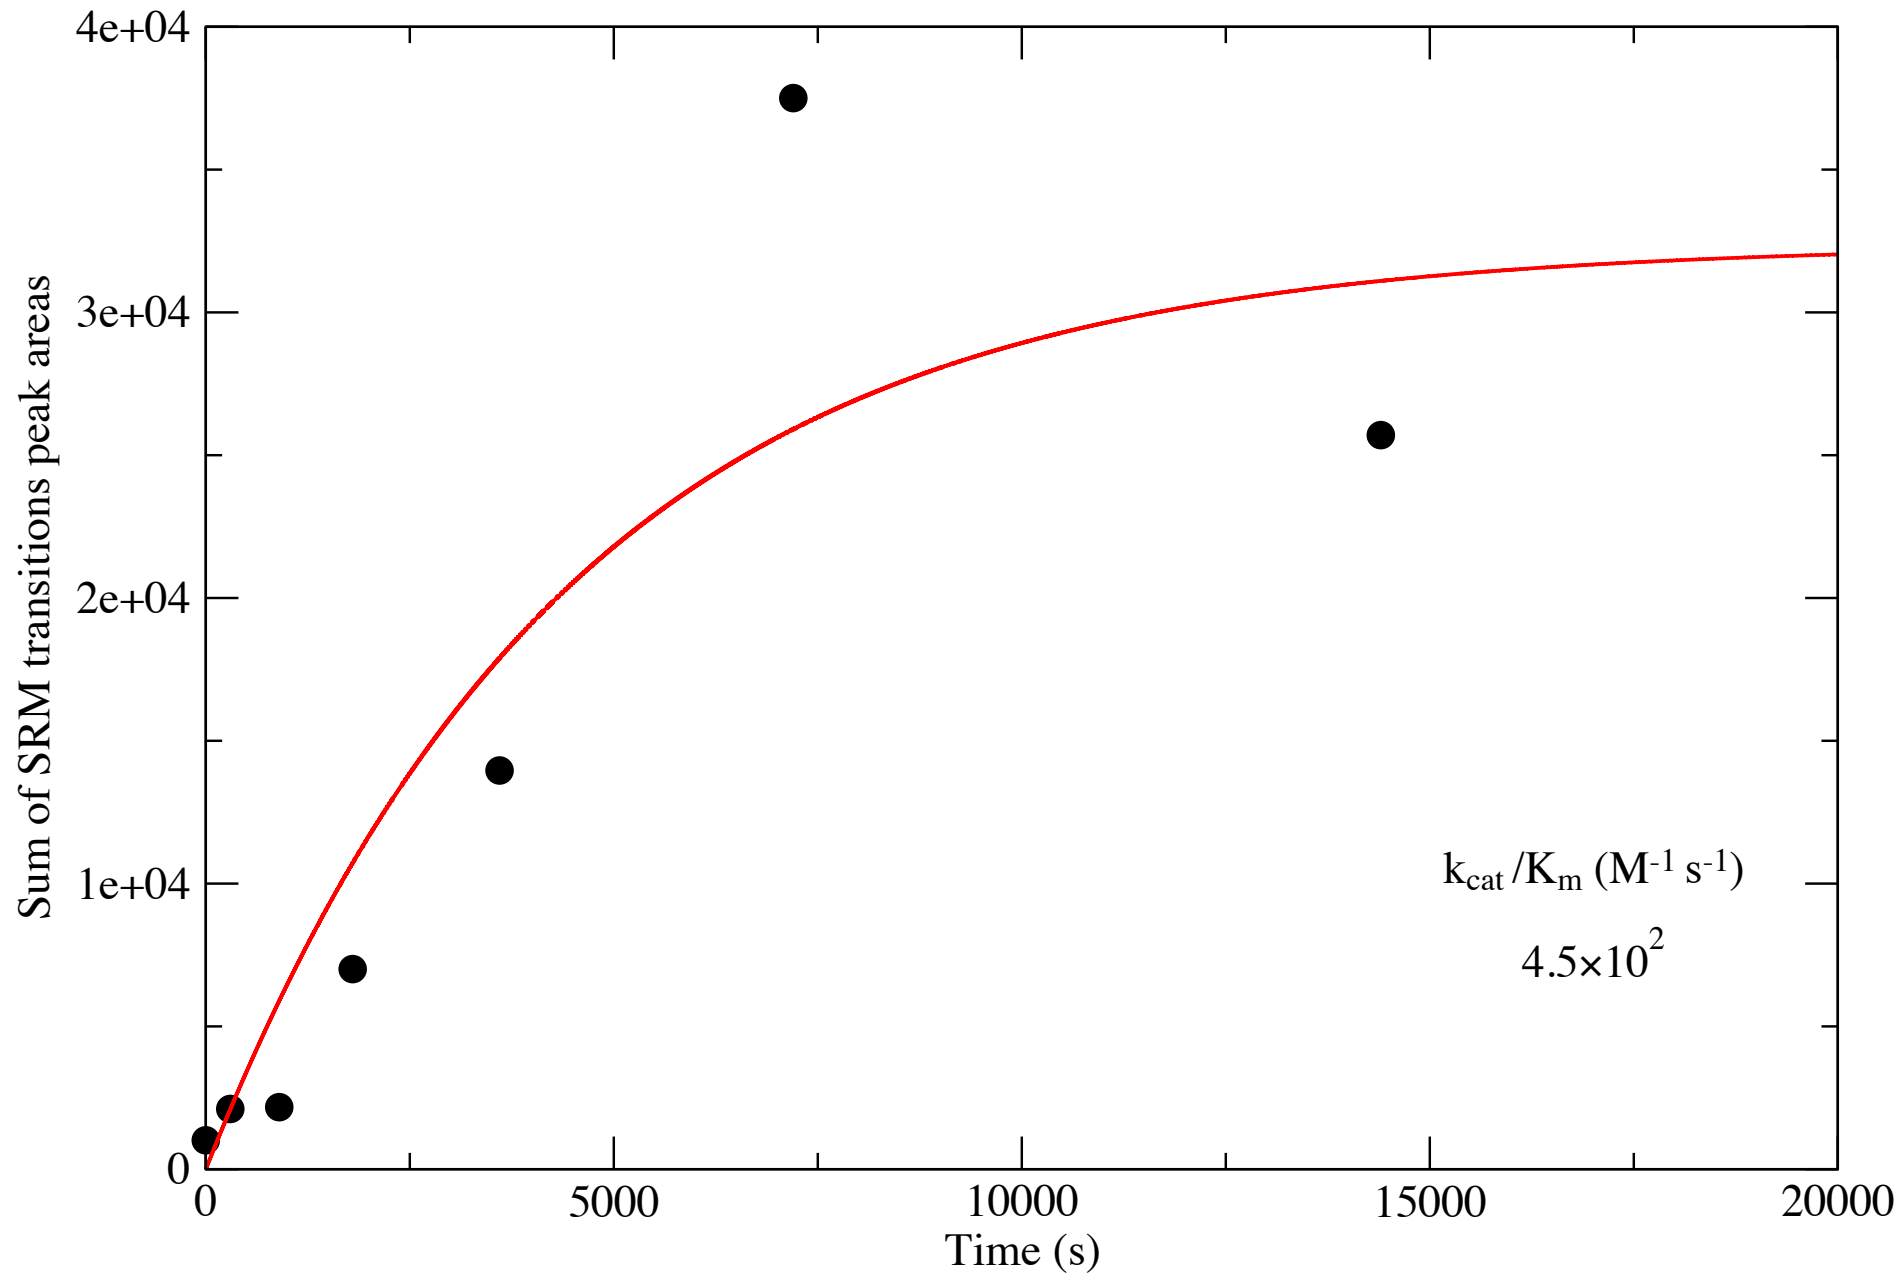



# MCM4\_HUMAN (GAAAEDIVASEQSLGQK)

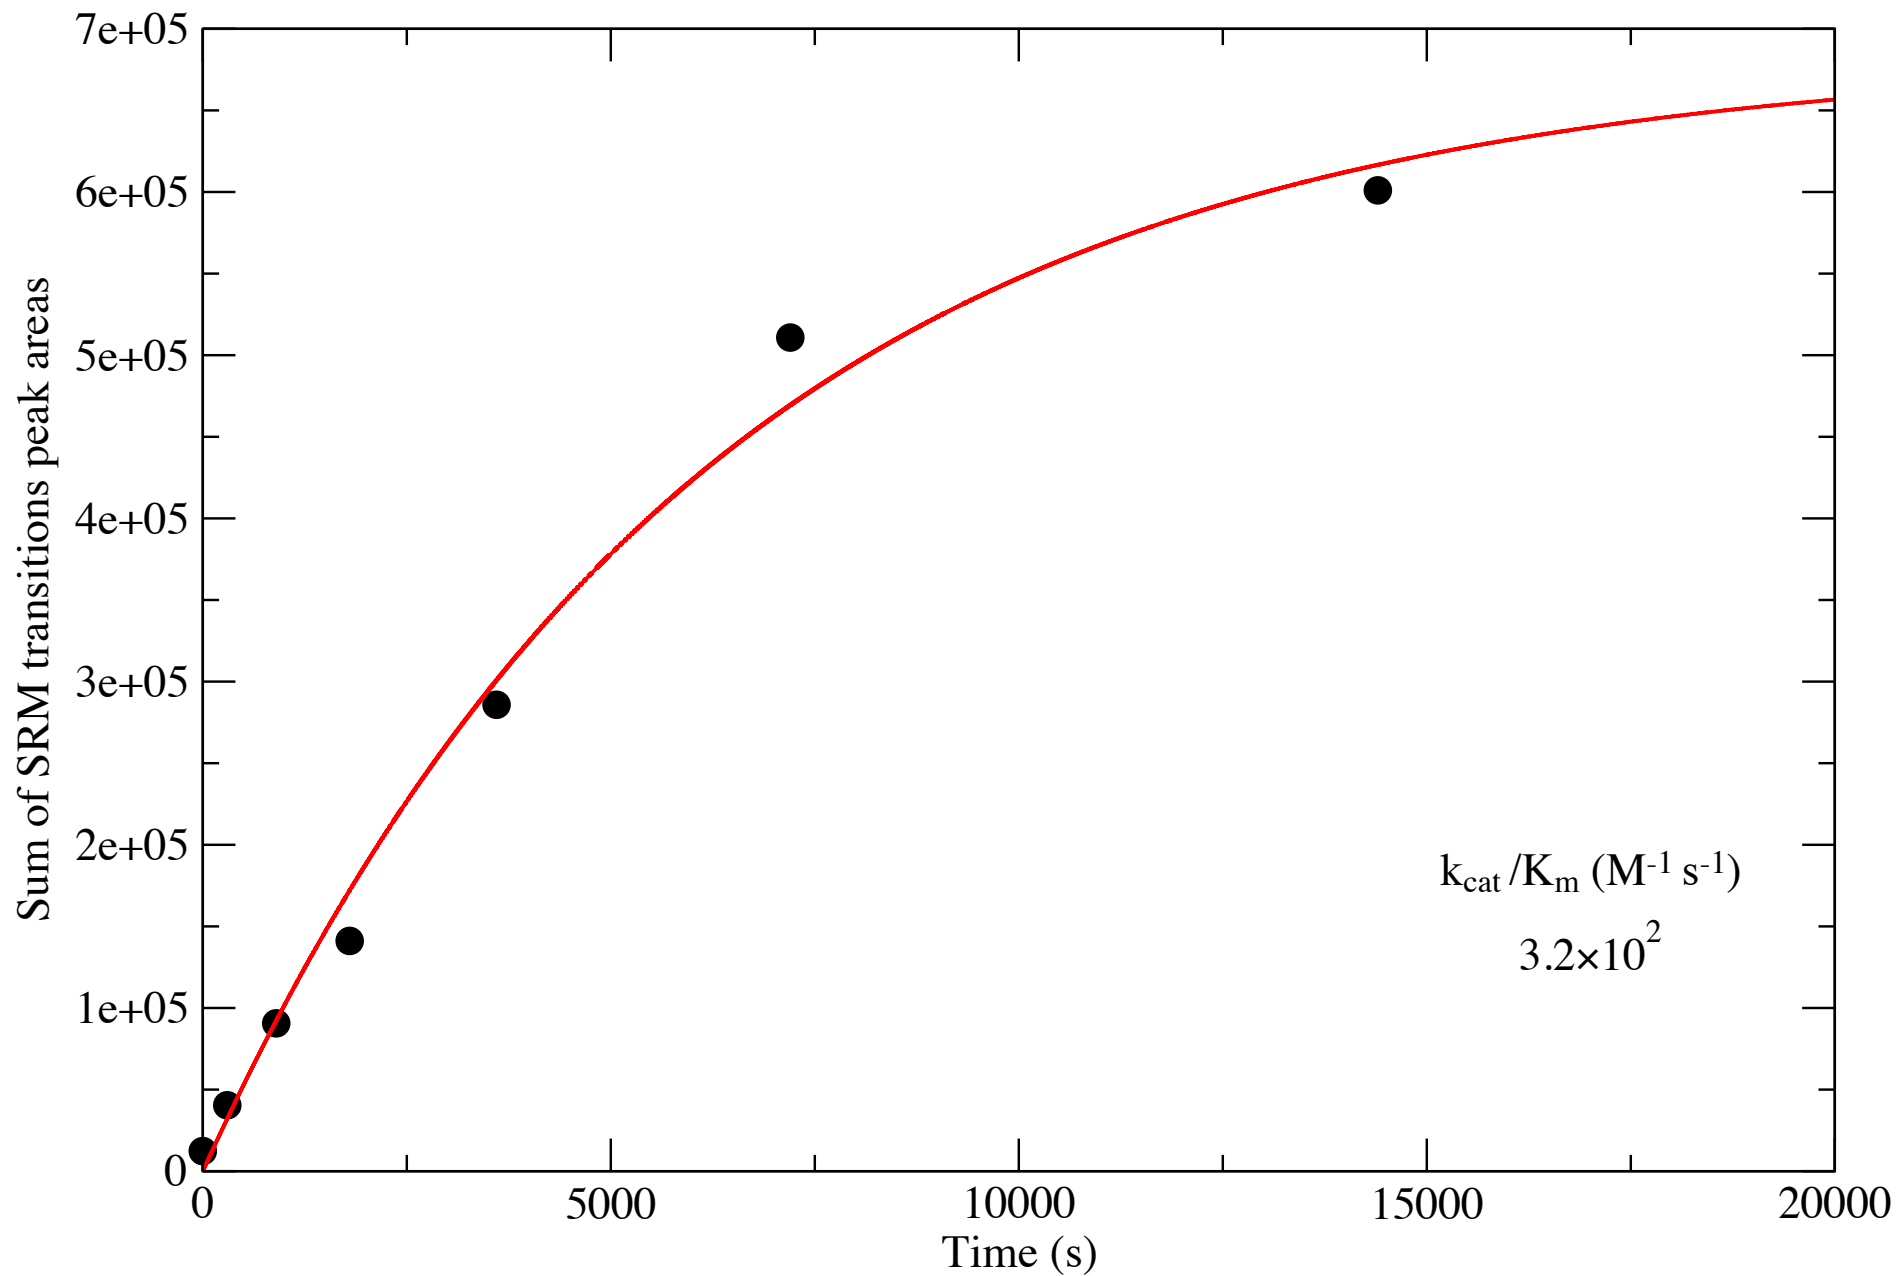

# MED17\_HUMAN (GTETYLPPLSMSQNLAR)

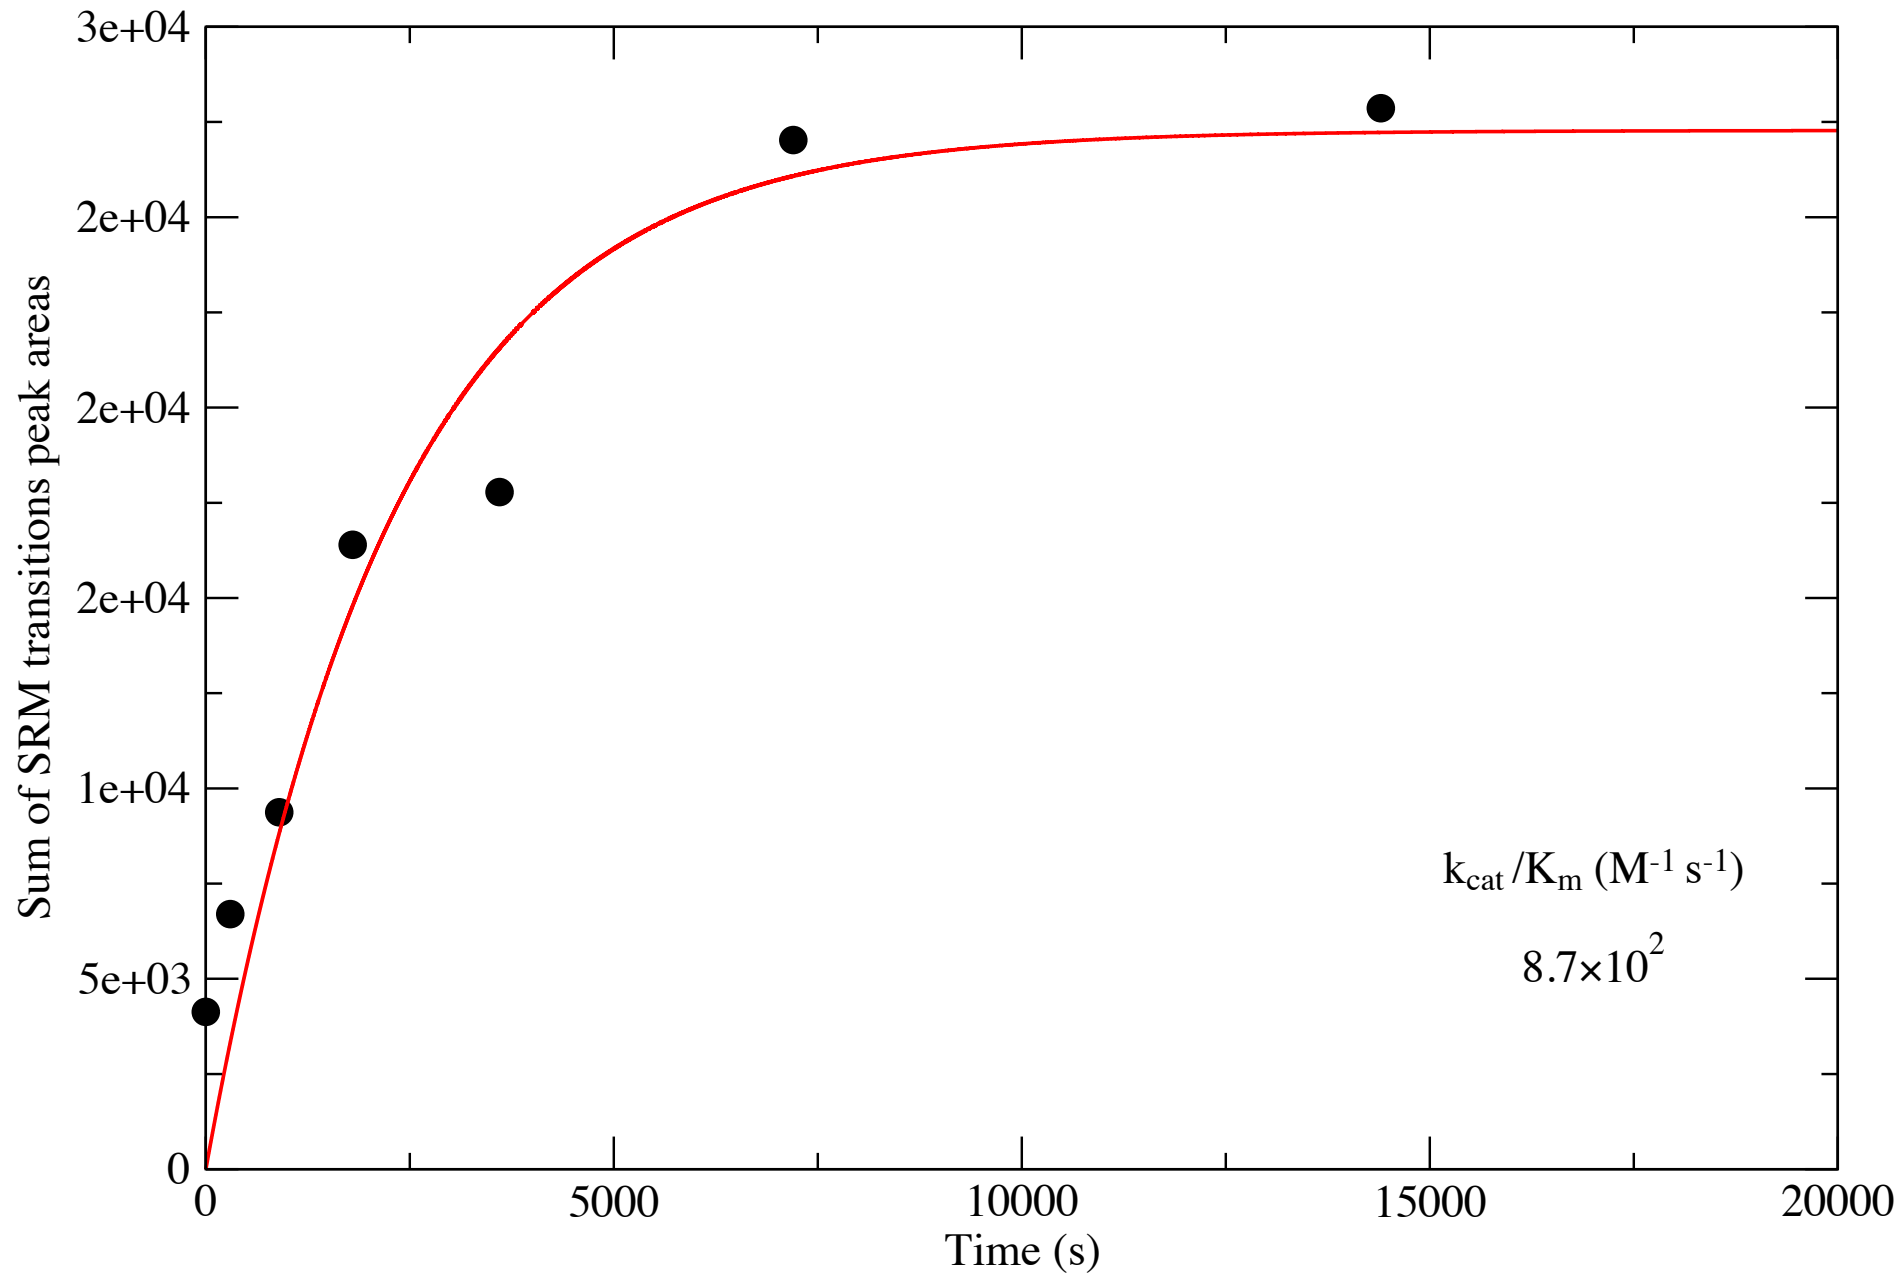

# MFAP1\_HUMAN (SAWGQESAQNTK)

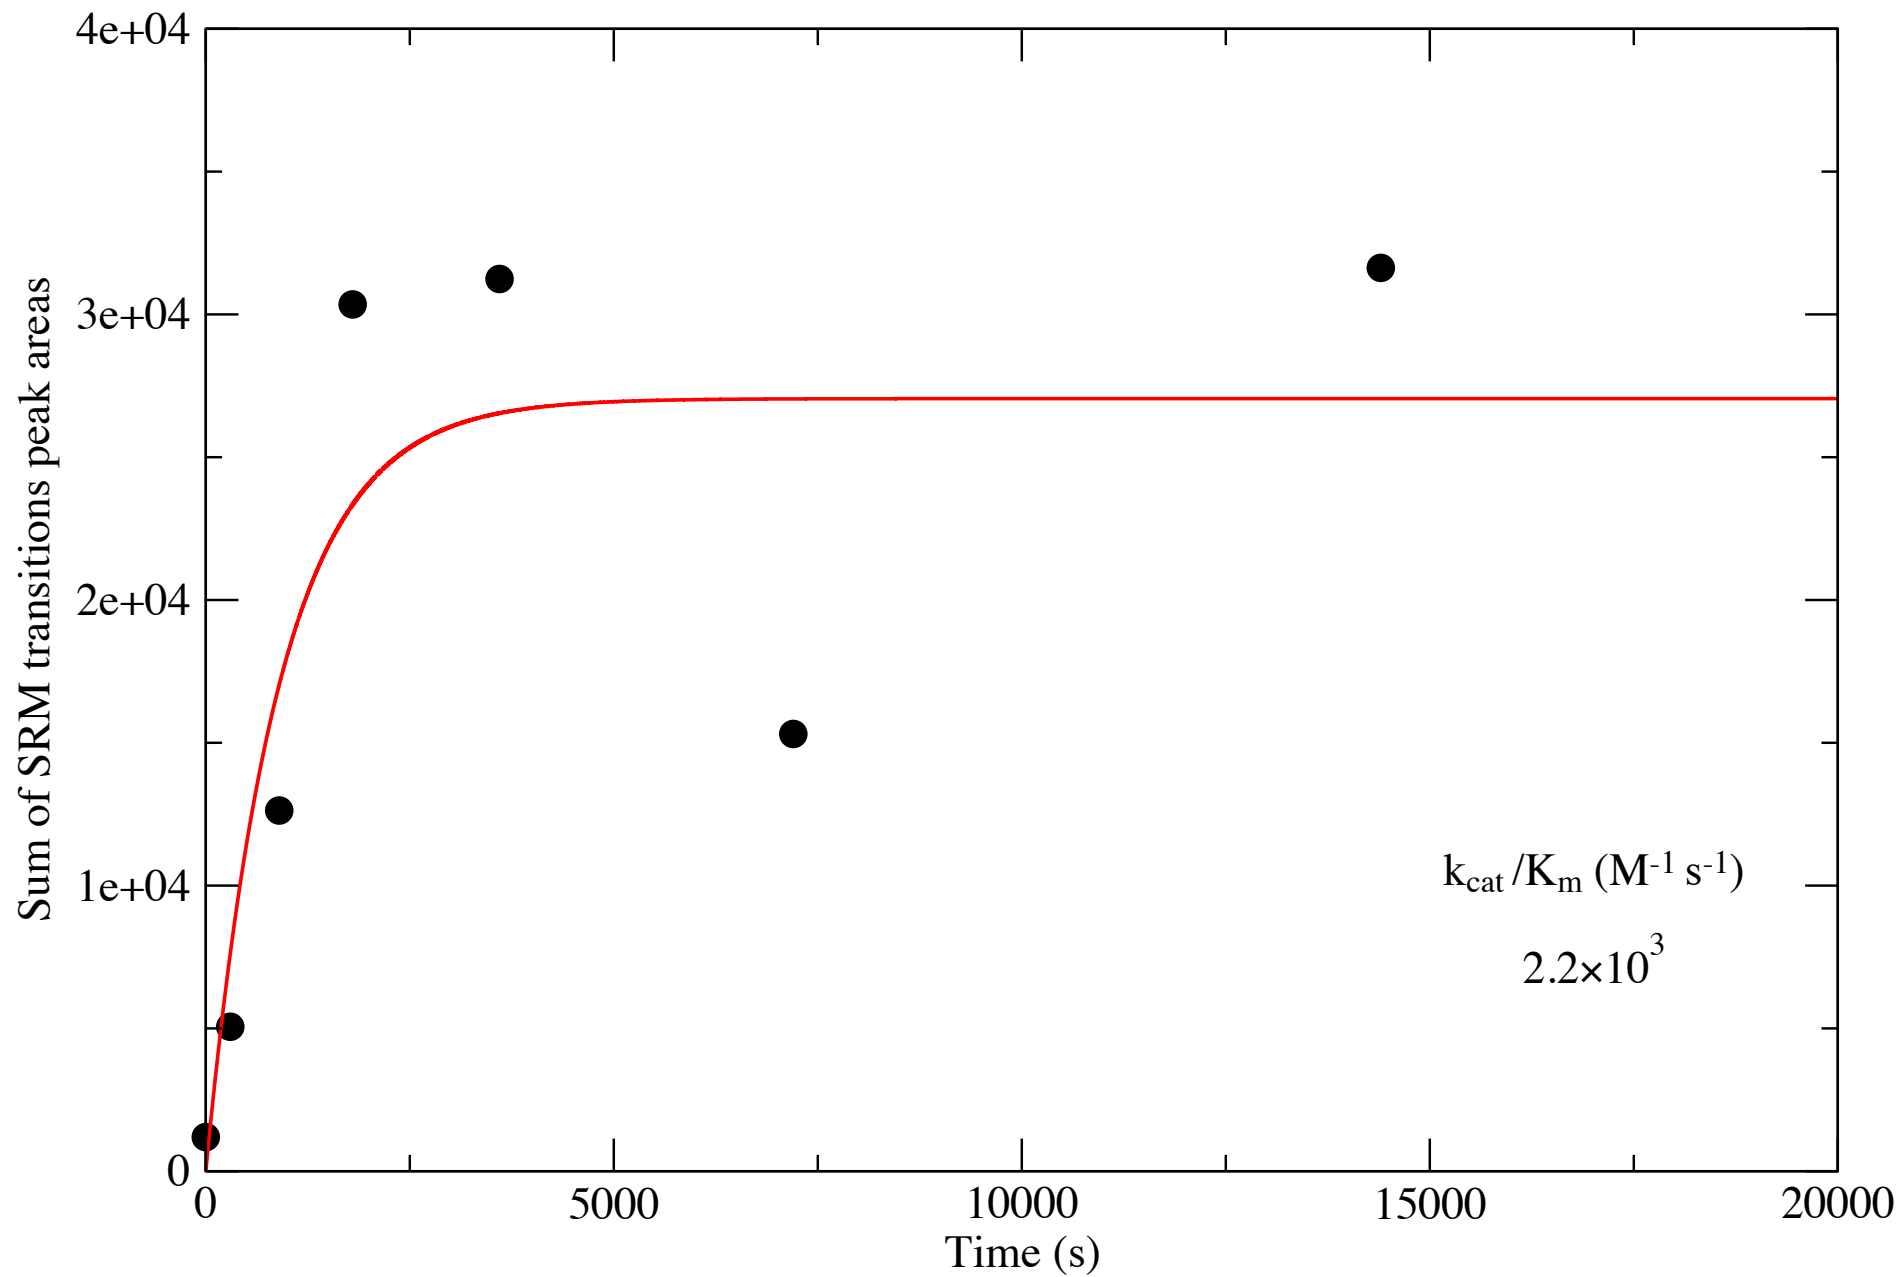

# MGME1\_HUMAN (ALLCGPVSK)

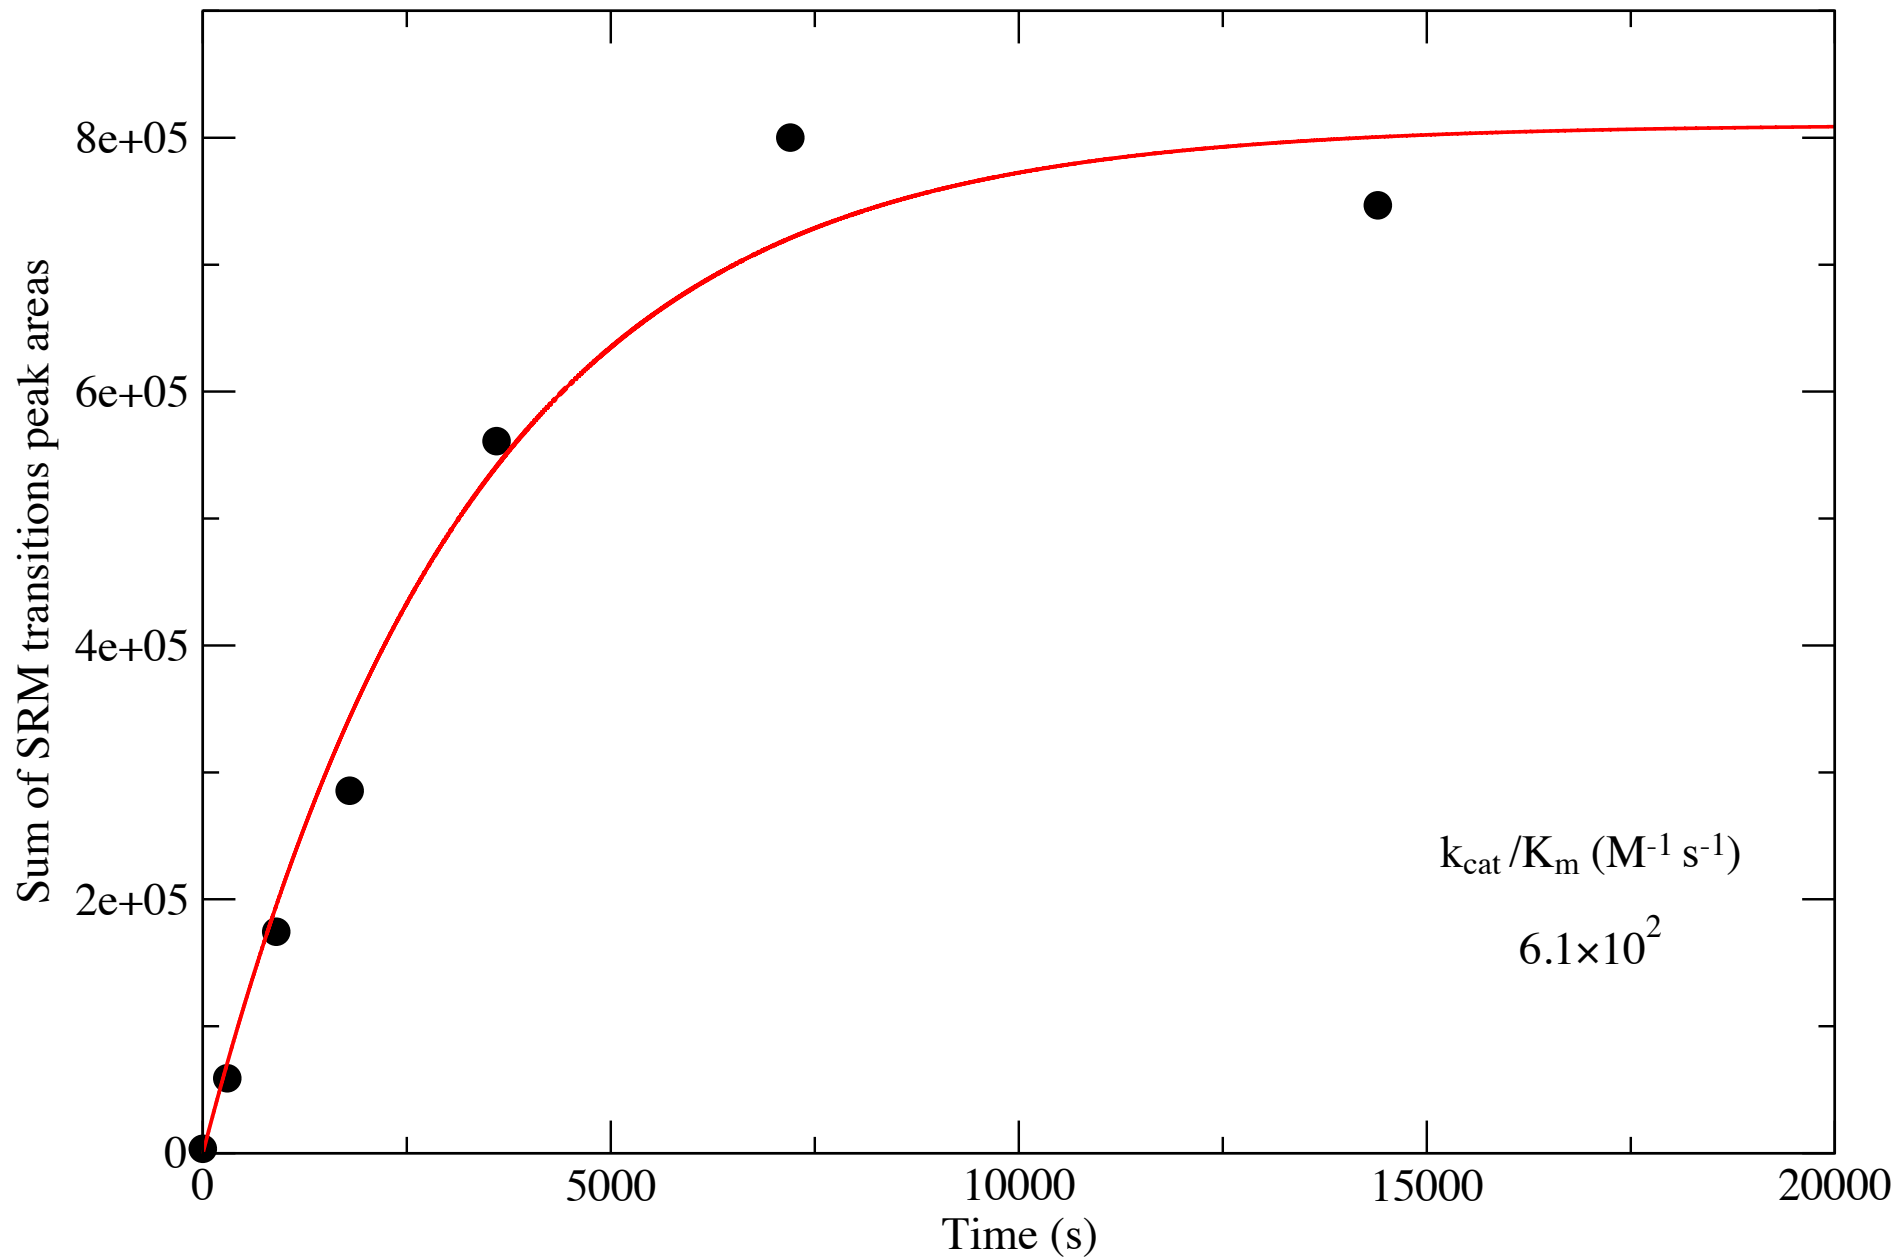

# MORC3\_HUMAN (AVILPSCVEAEAK)

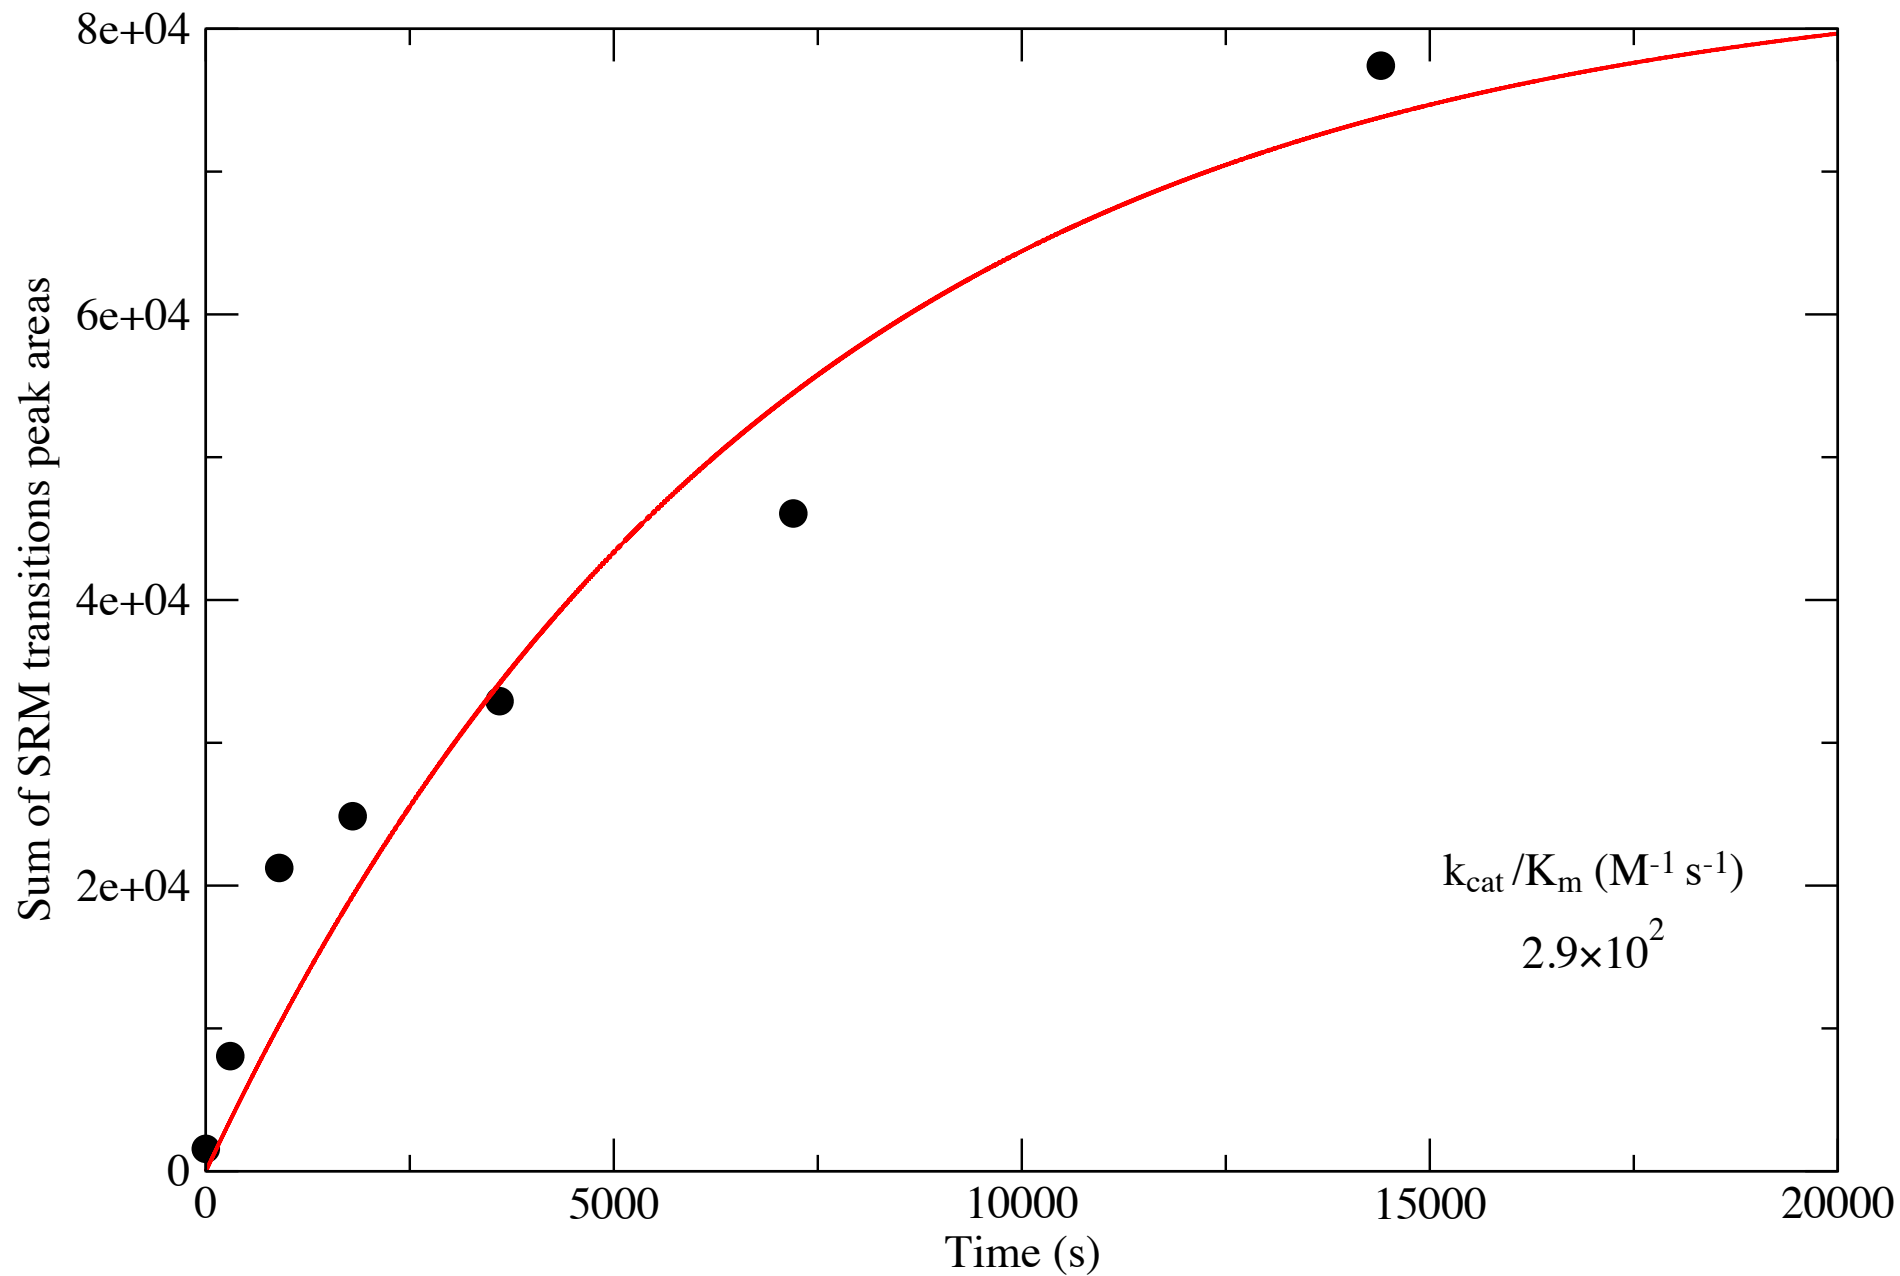

# MYO7B\_HUMAN (GLAEYTFPK)

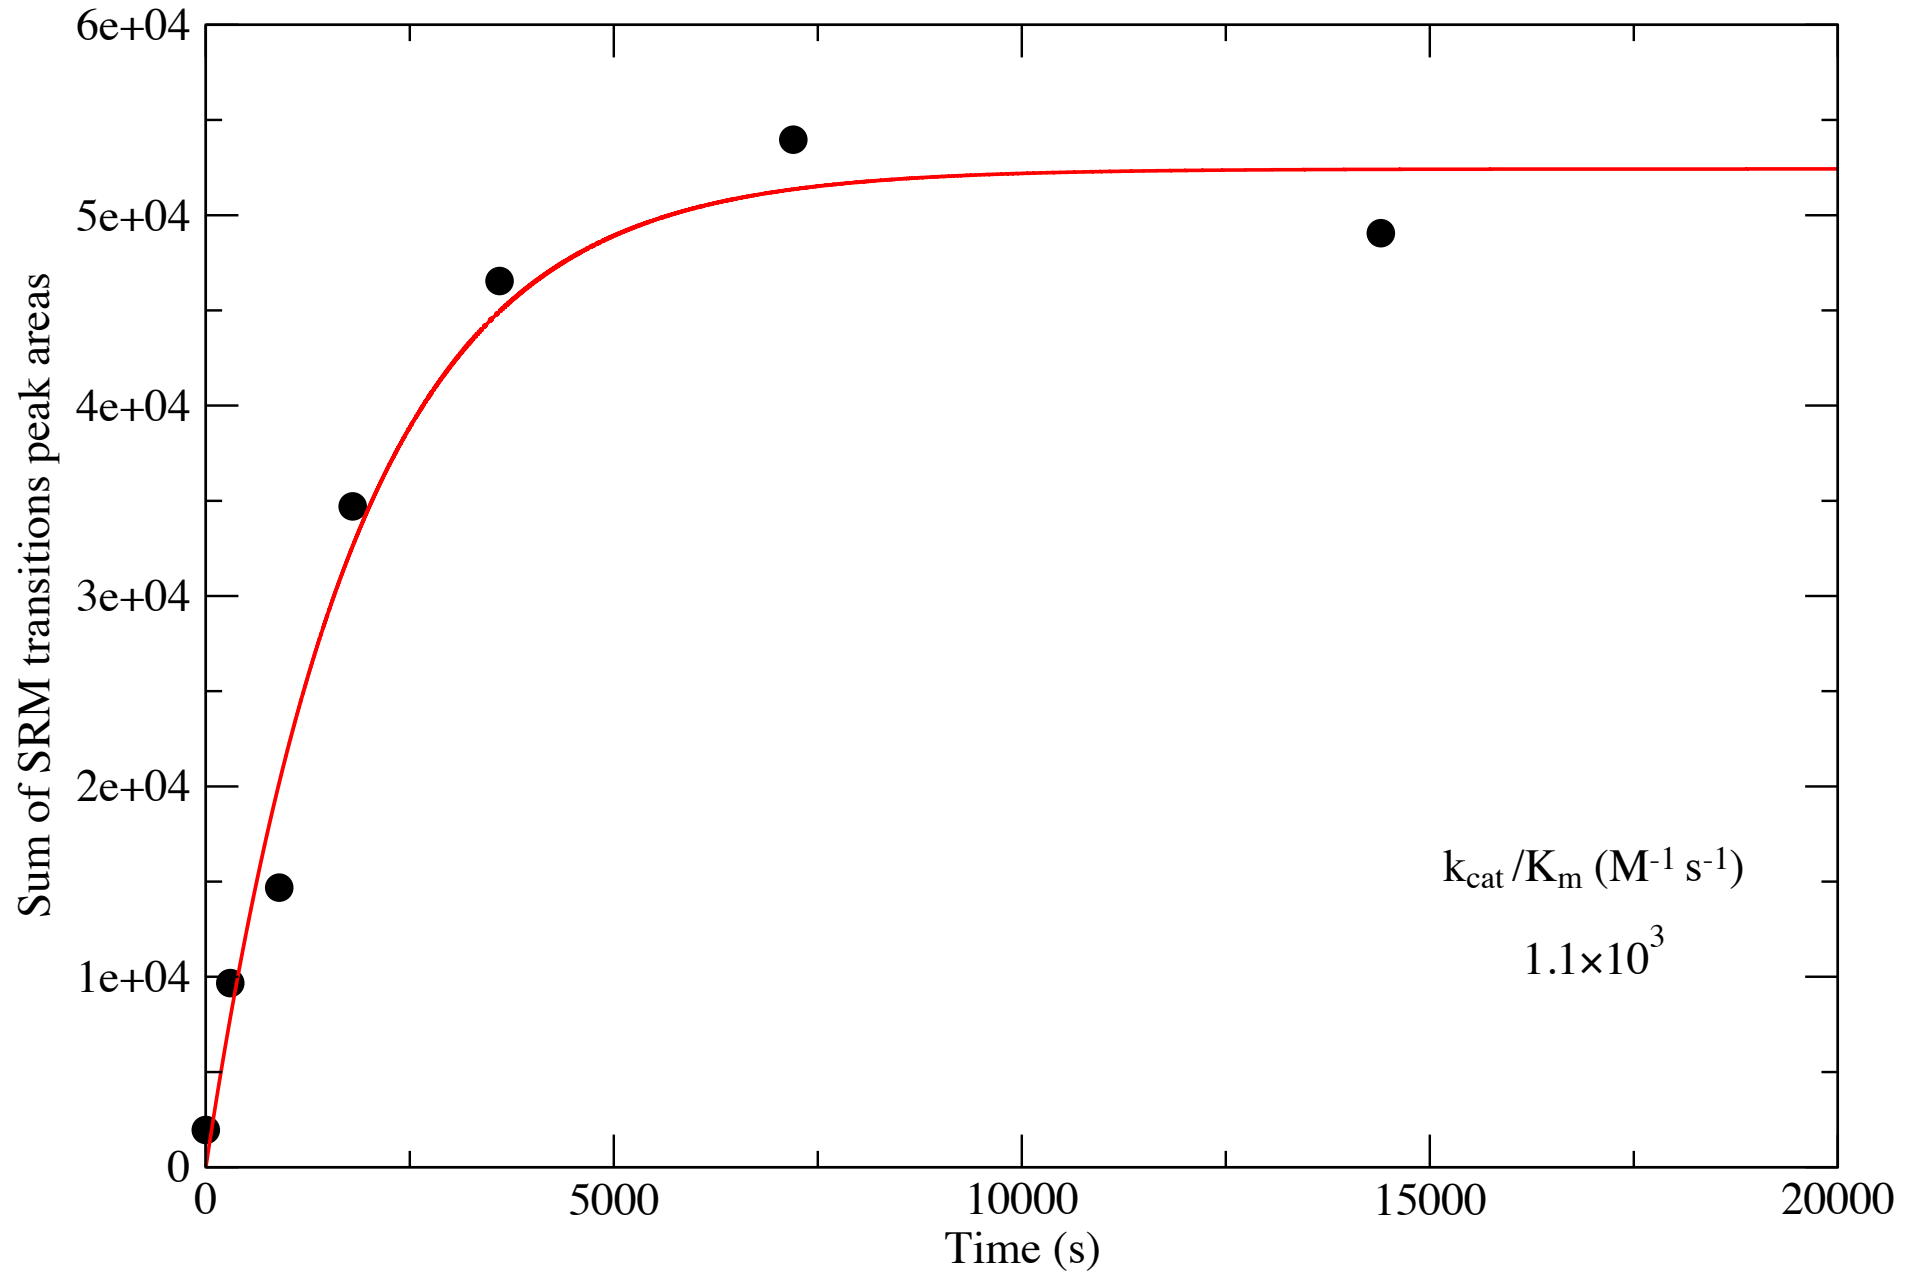

# MYO9B\_HUMAN (SLTSDKASVPIVLEK)

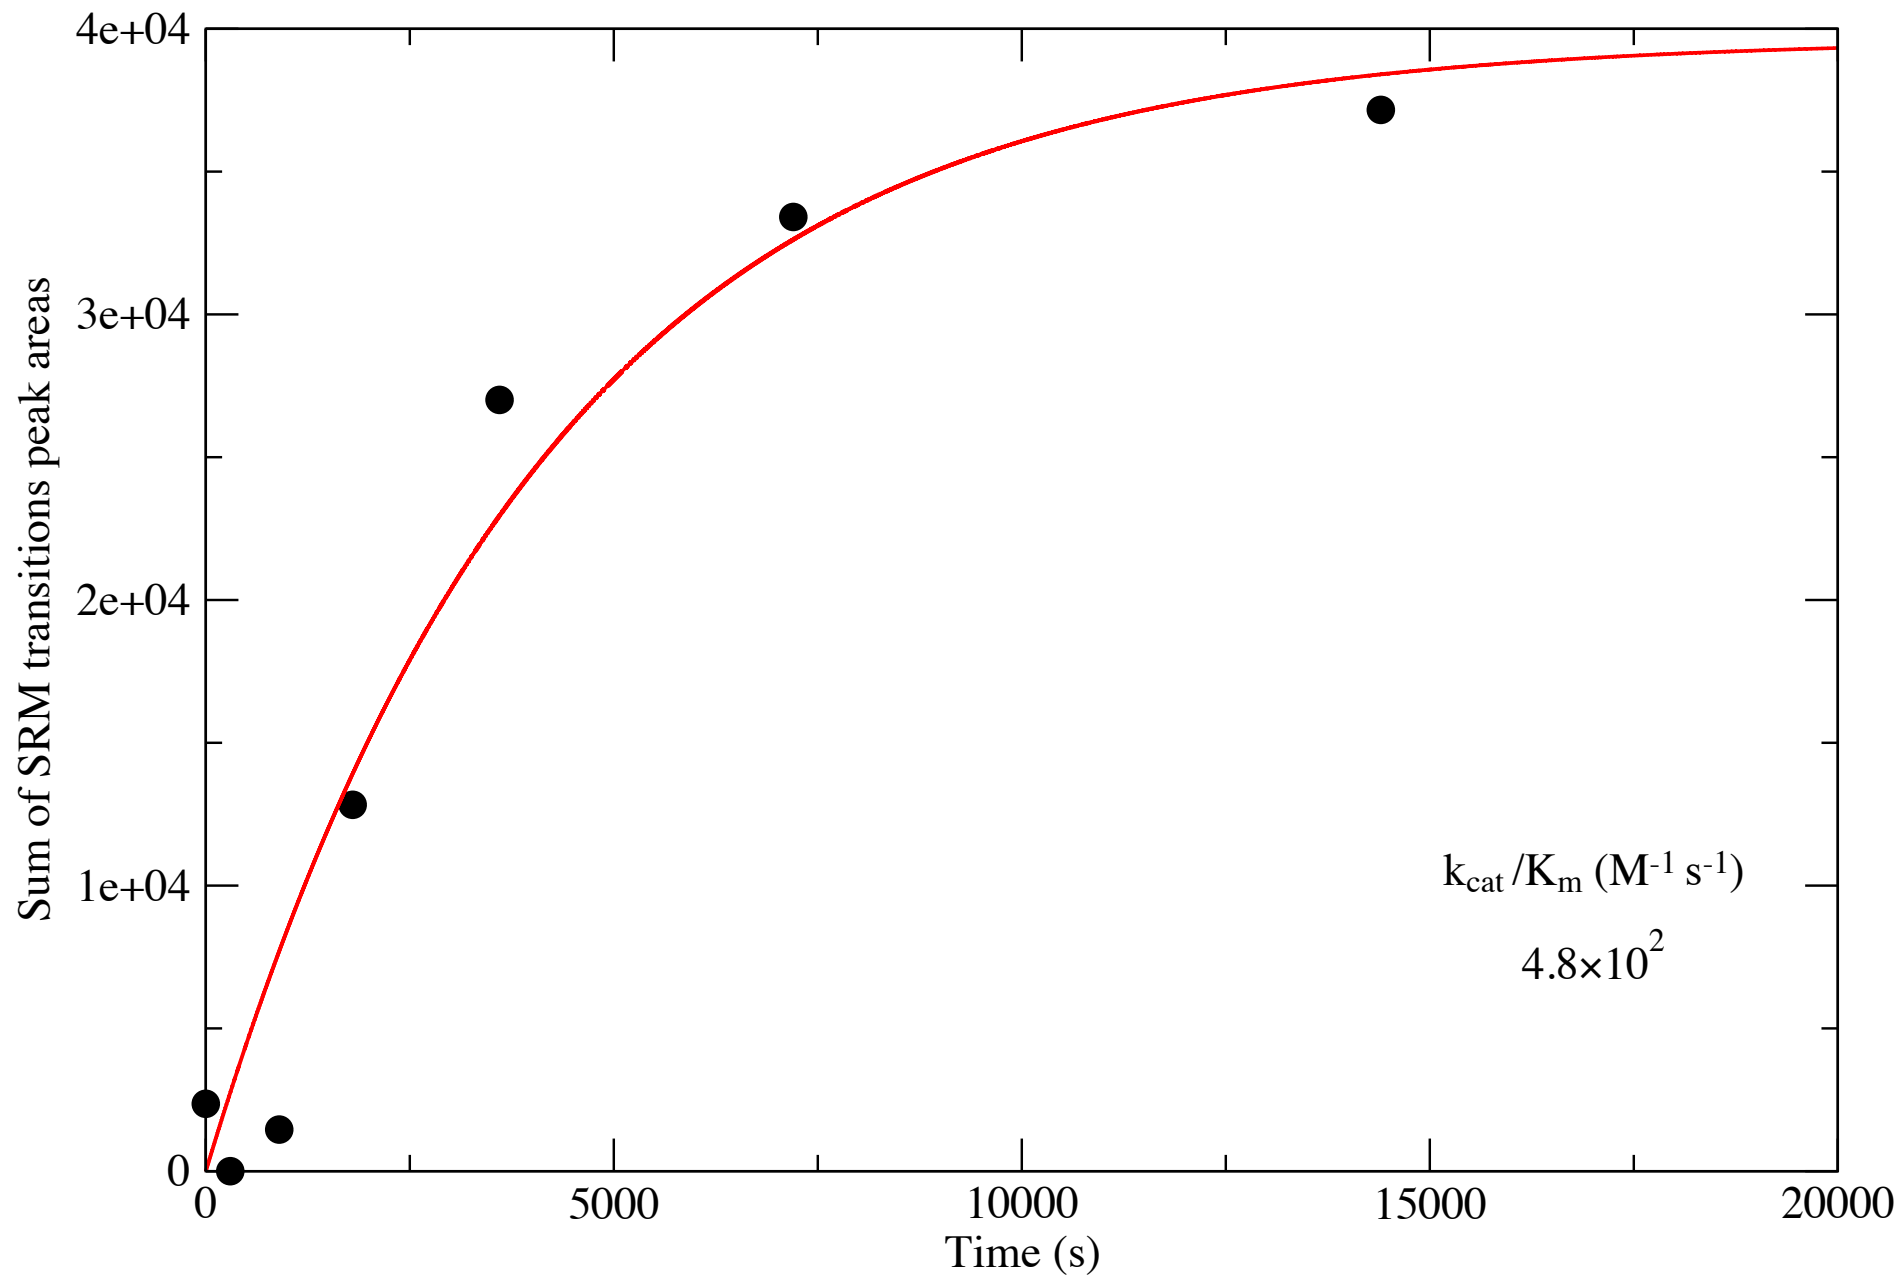

# N4BP1\_HUMAN (GLSPSVASPSPK)

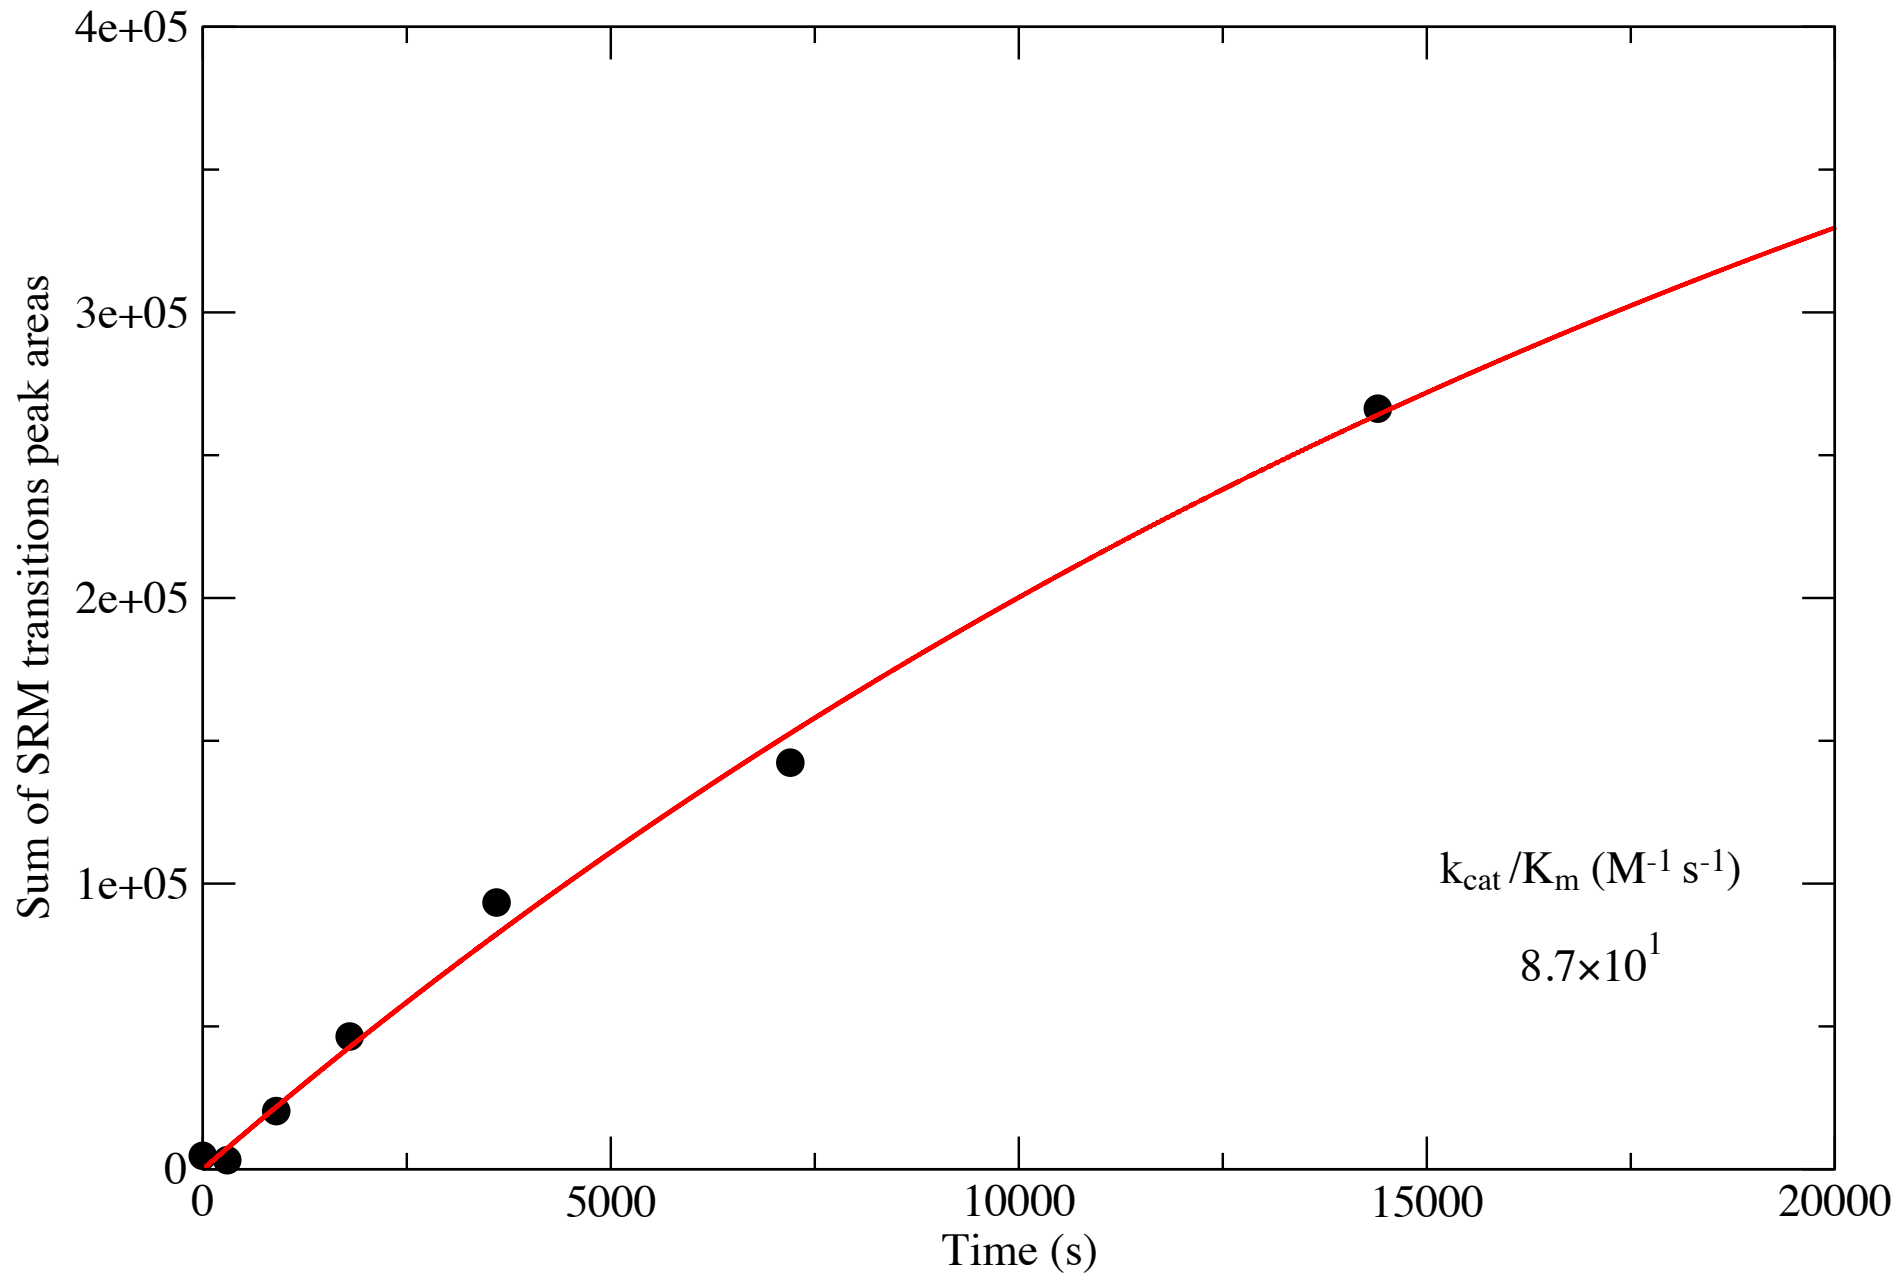



# N4BP1\_HUMAN (GLSPSVASPSPKKEVNFVSR)

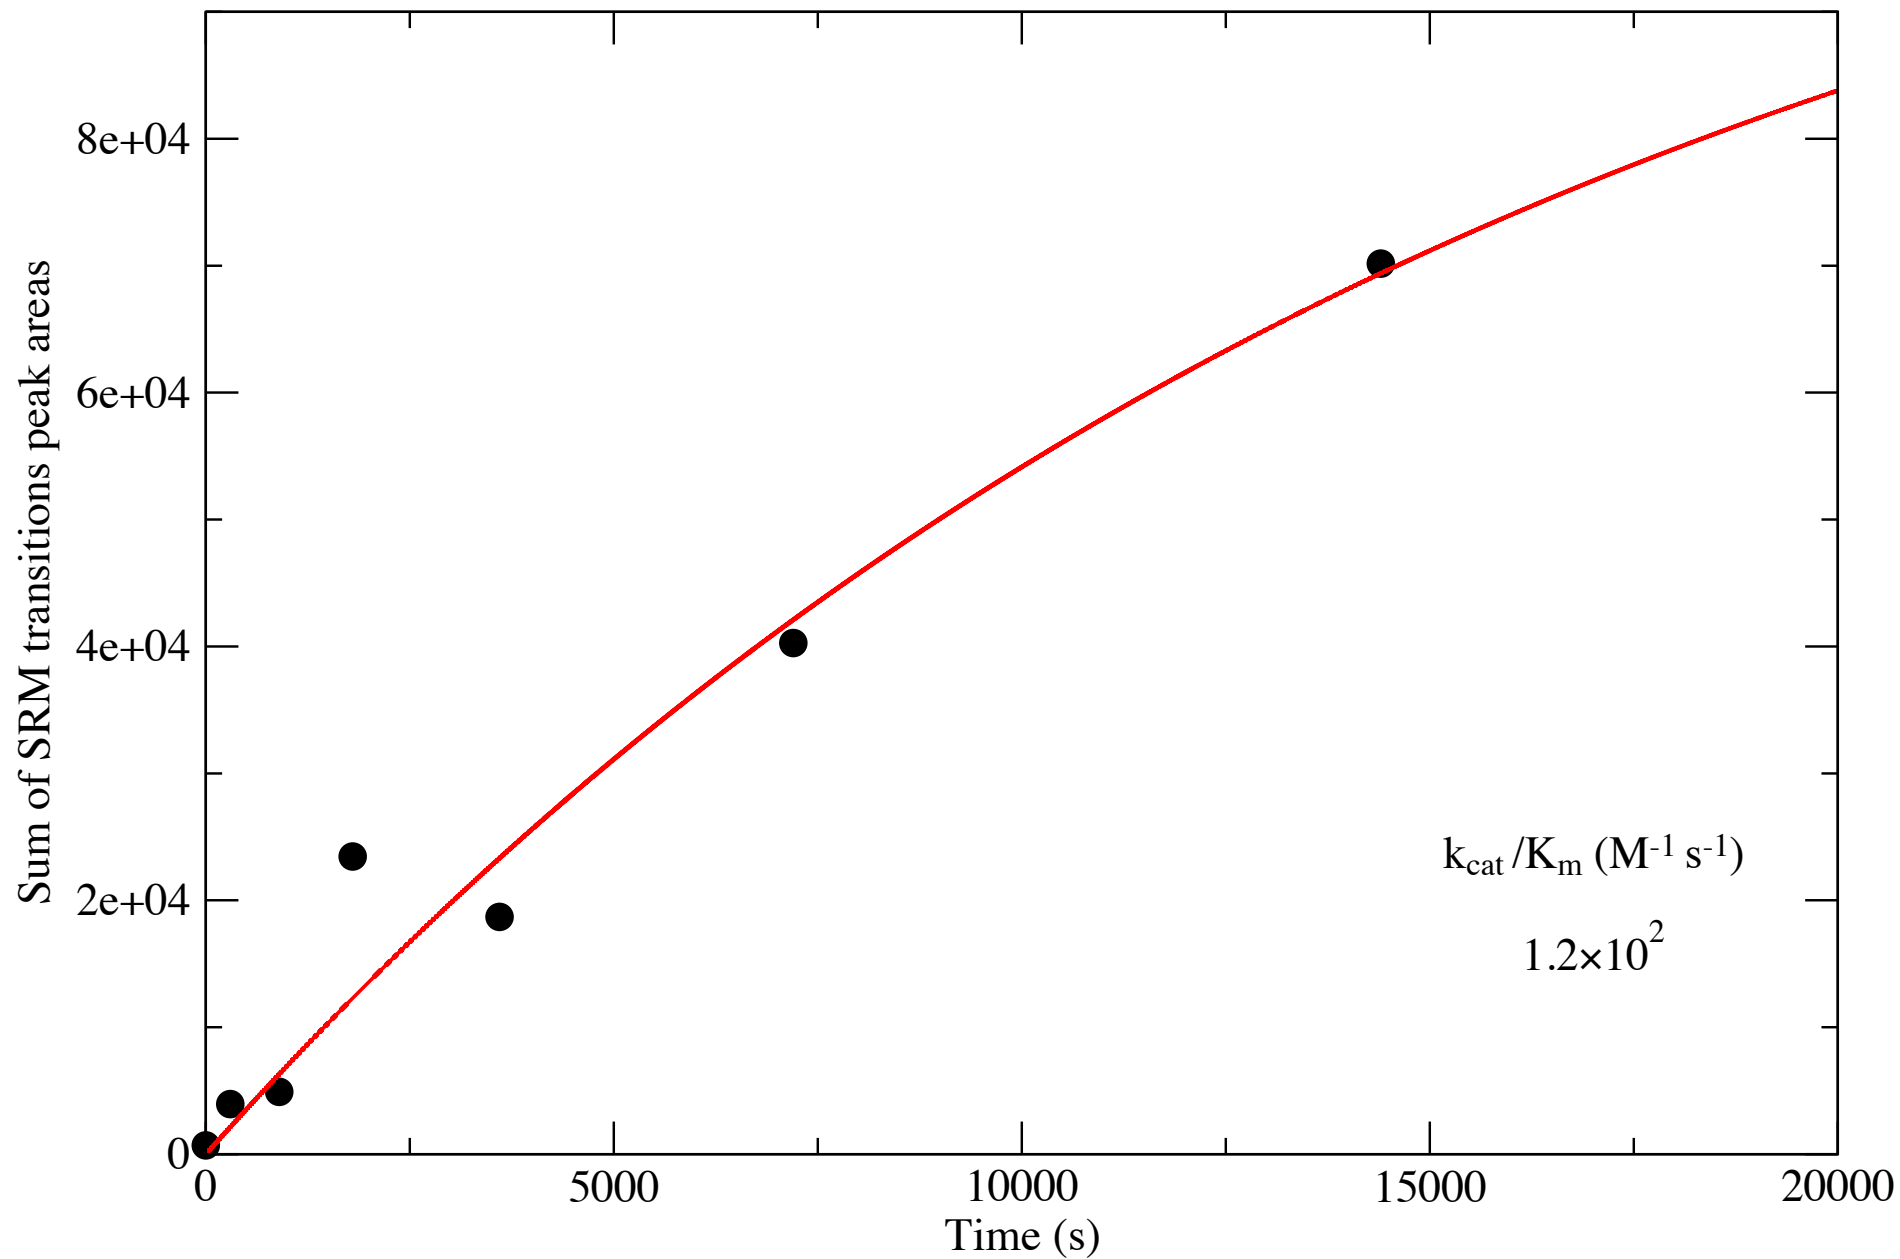

# NDUS1\_HUMAN (GQSVMVVEPGTTVLQACEK)

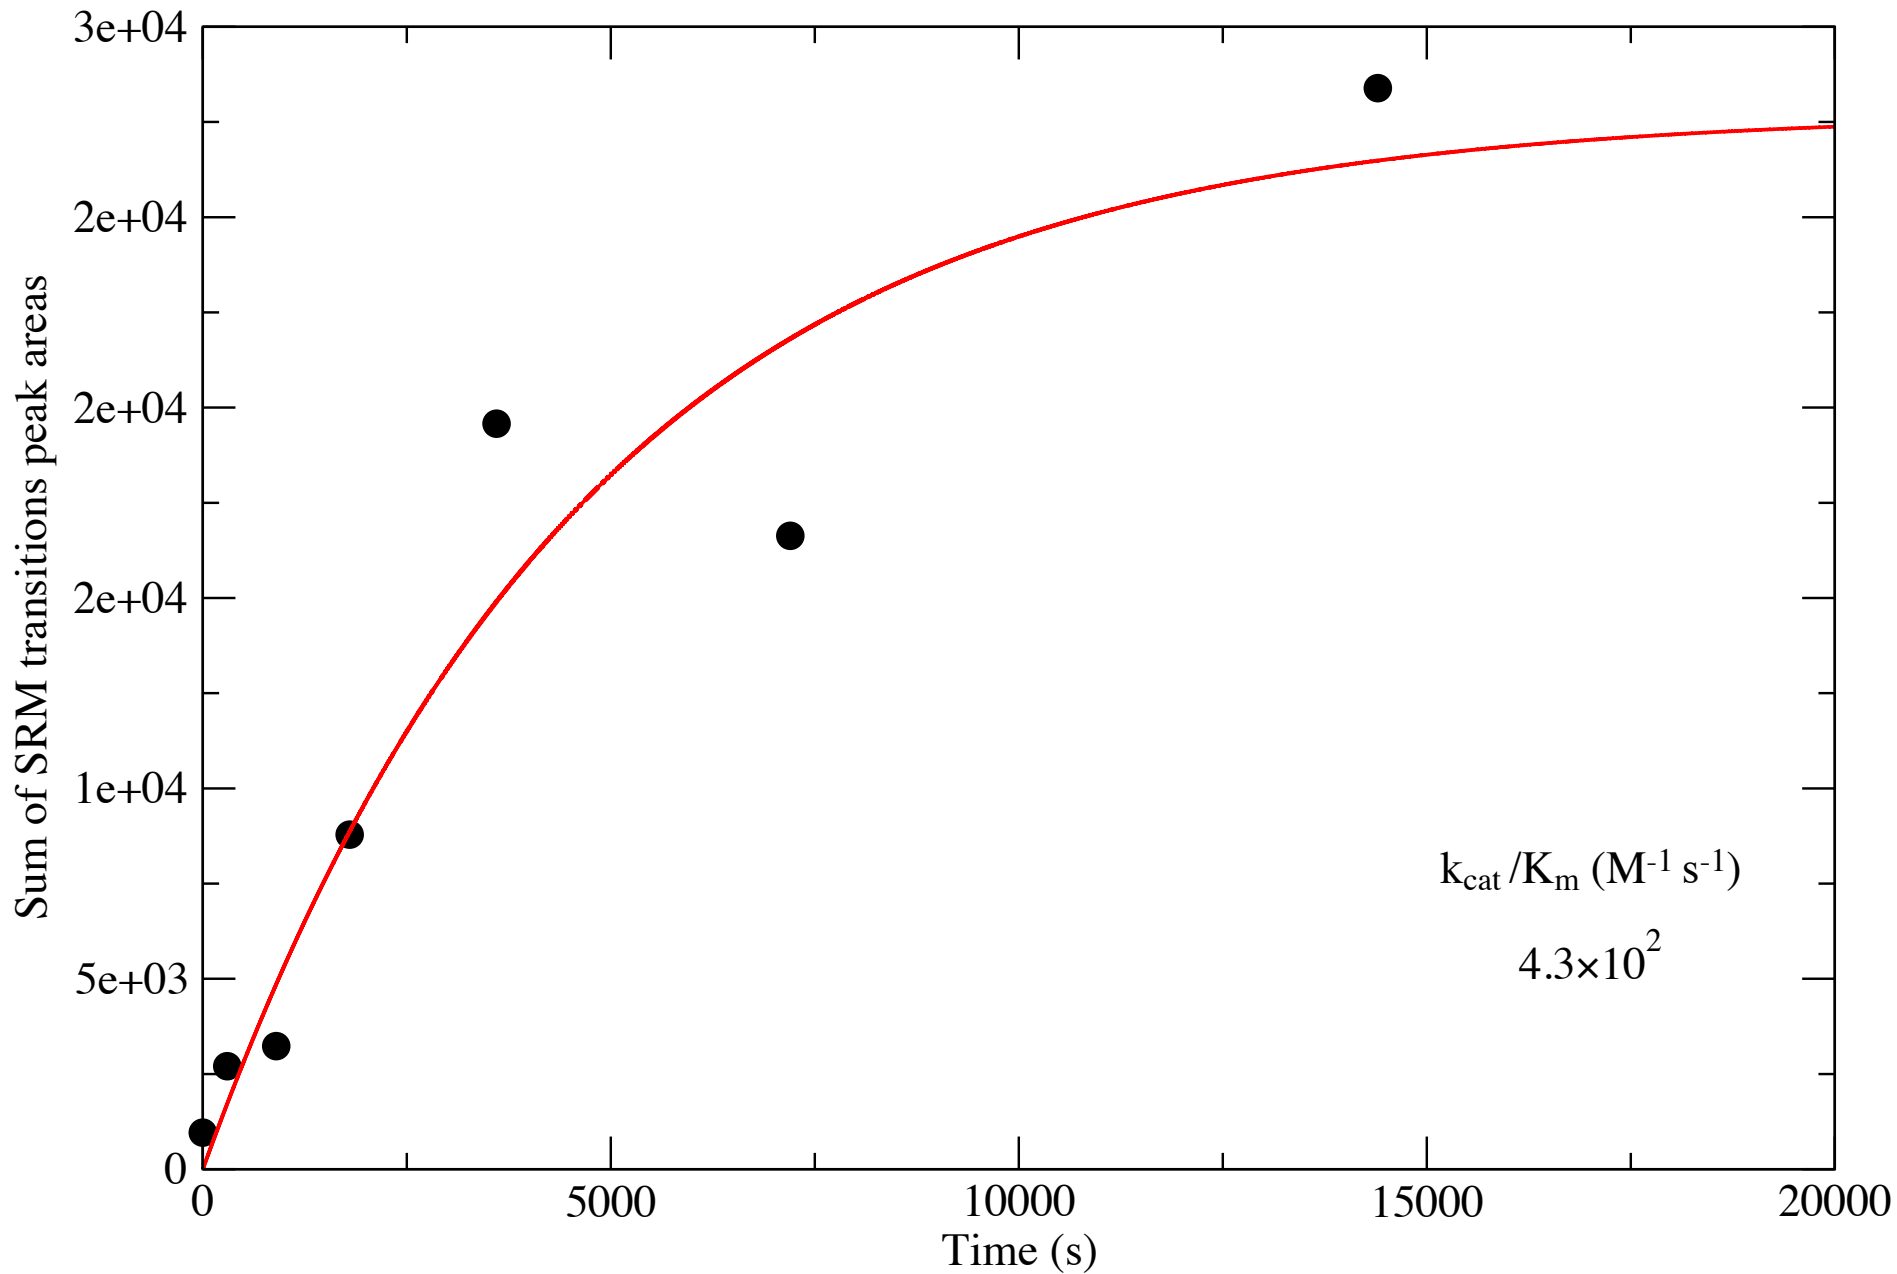

# NEK4\_HUMAN (GFVQENQPR)

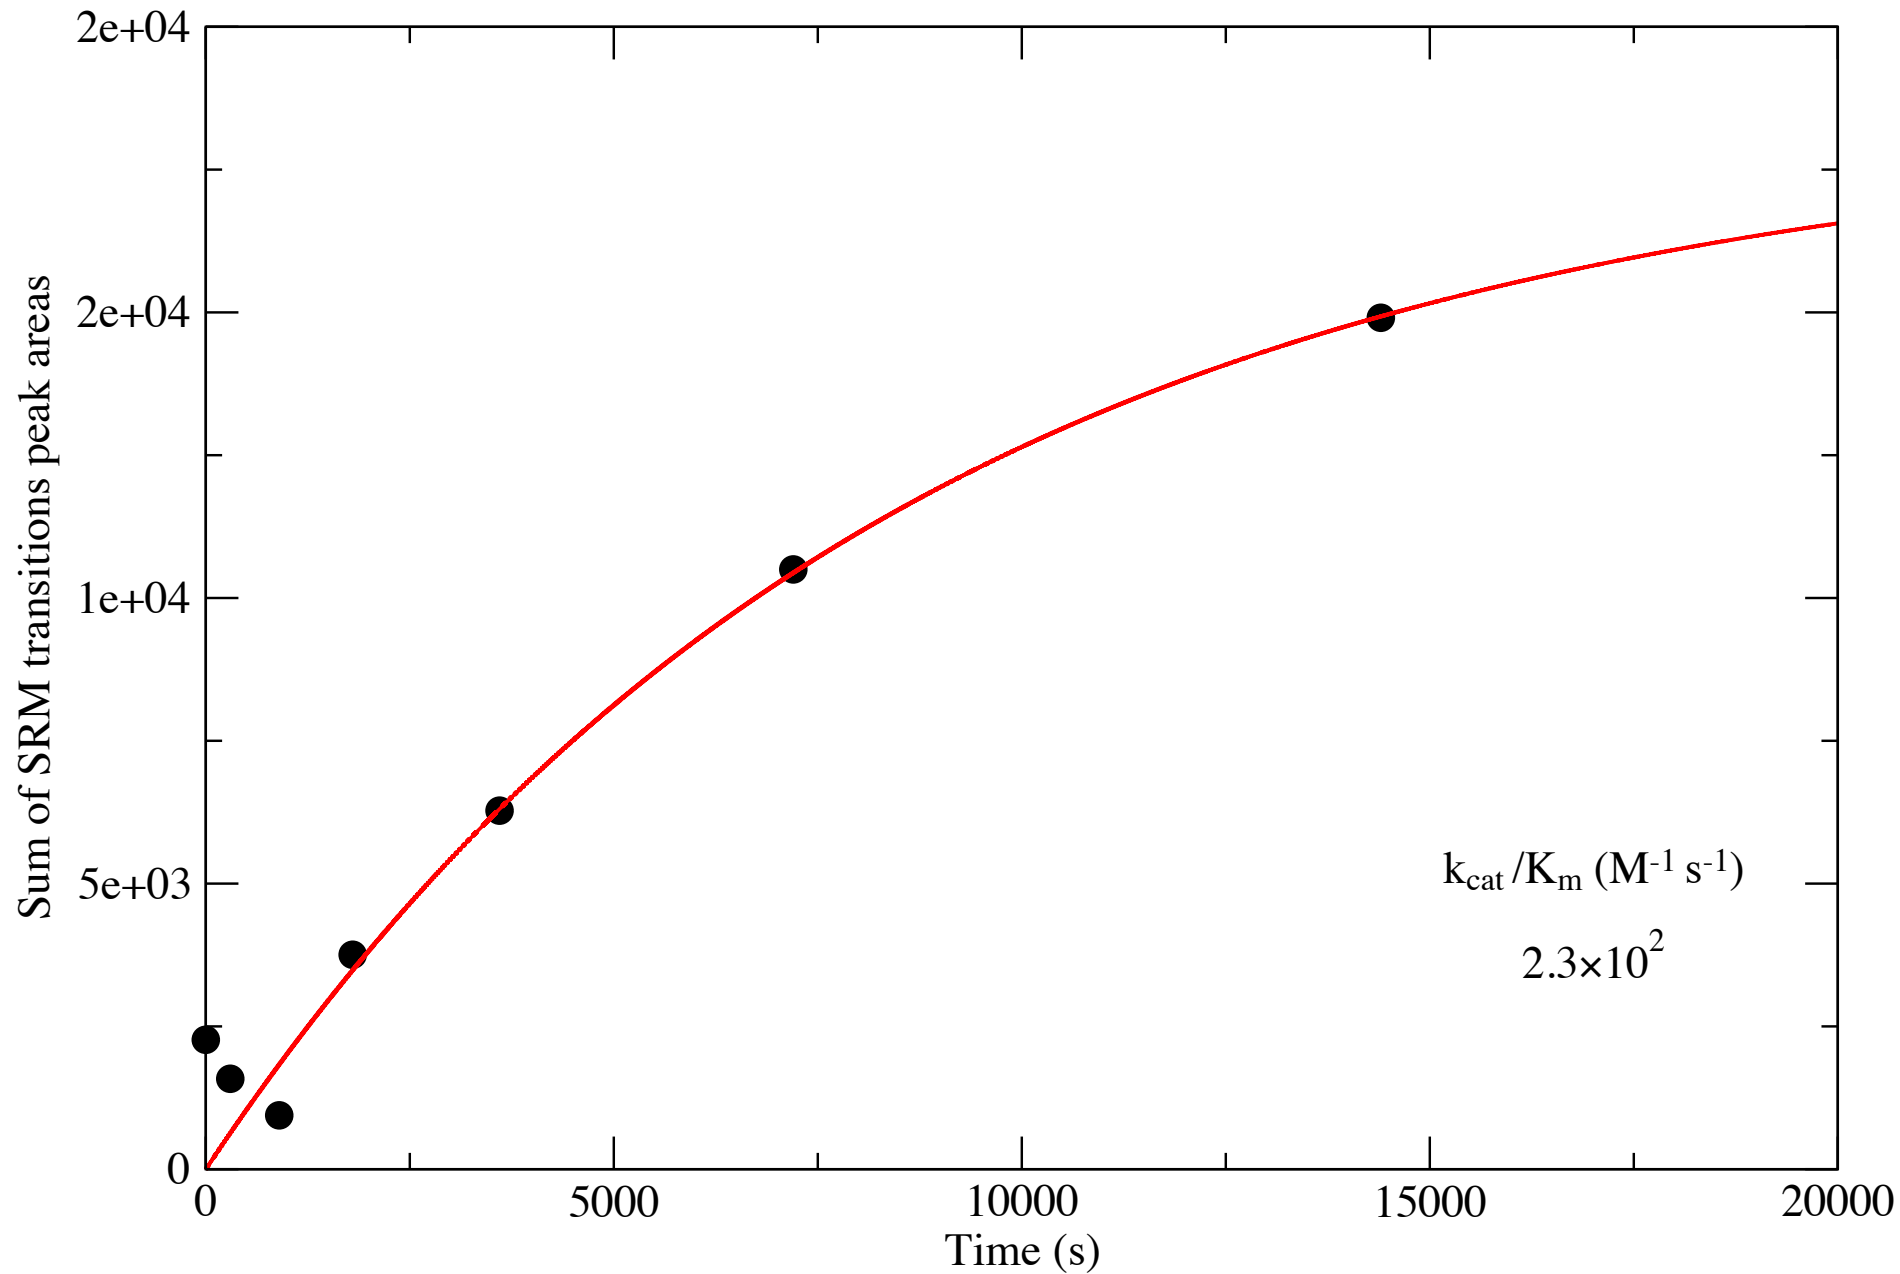

# NIPBL\_HUMAN (ALAEIER)

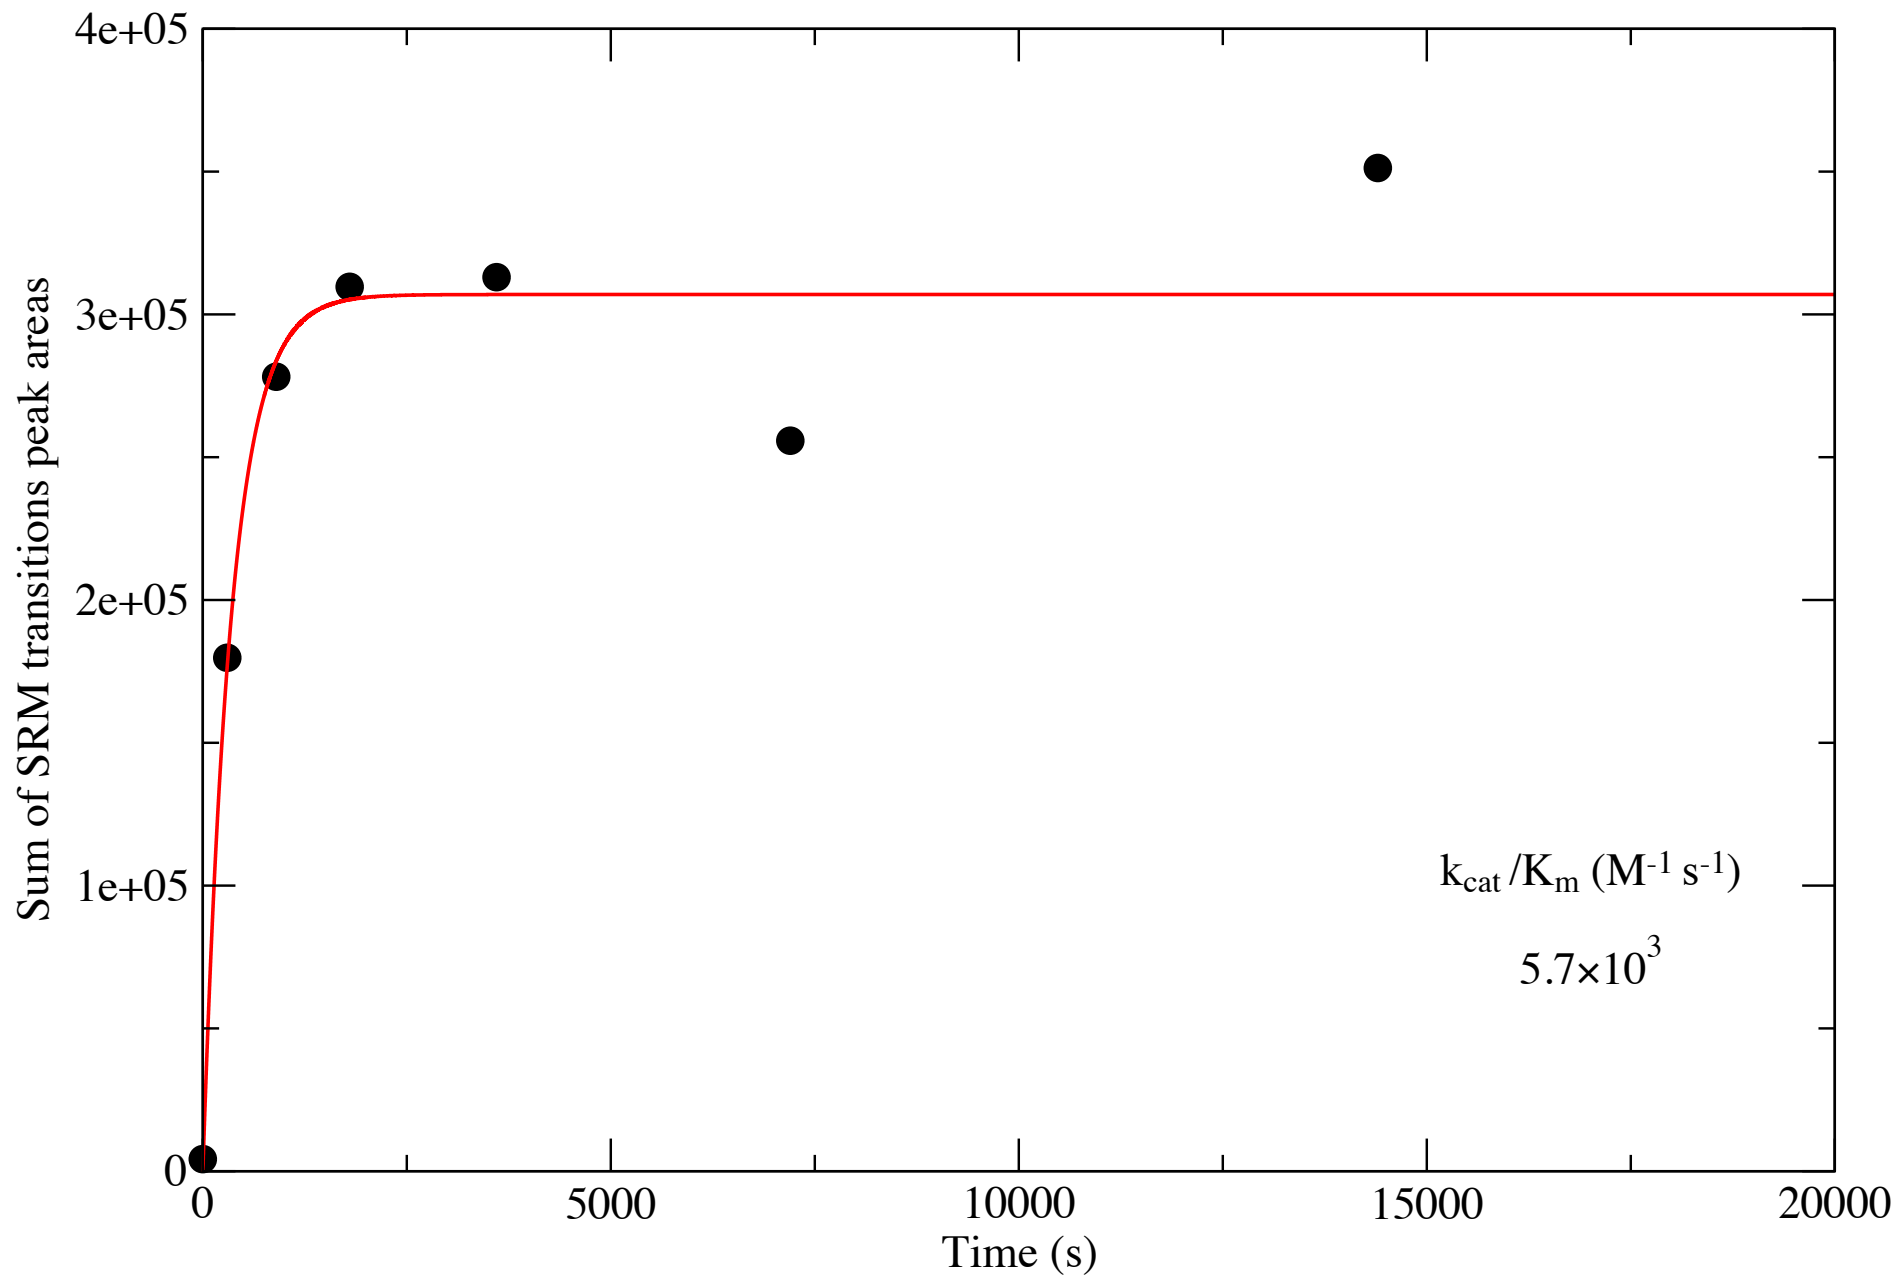

# NMT1\_HUMAN (SAQDQPVKMNSLPAER)

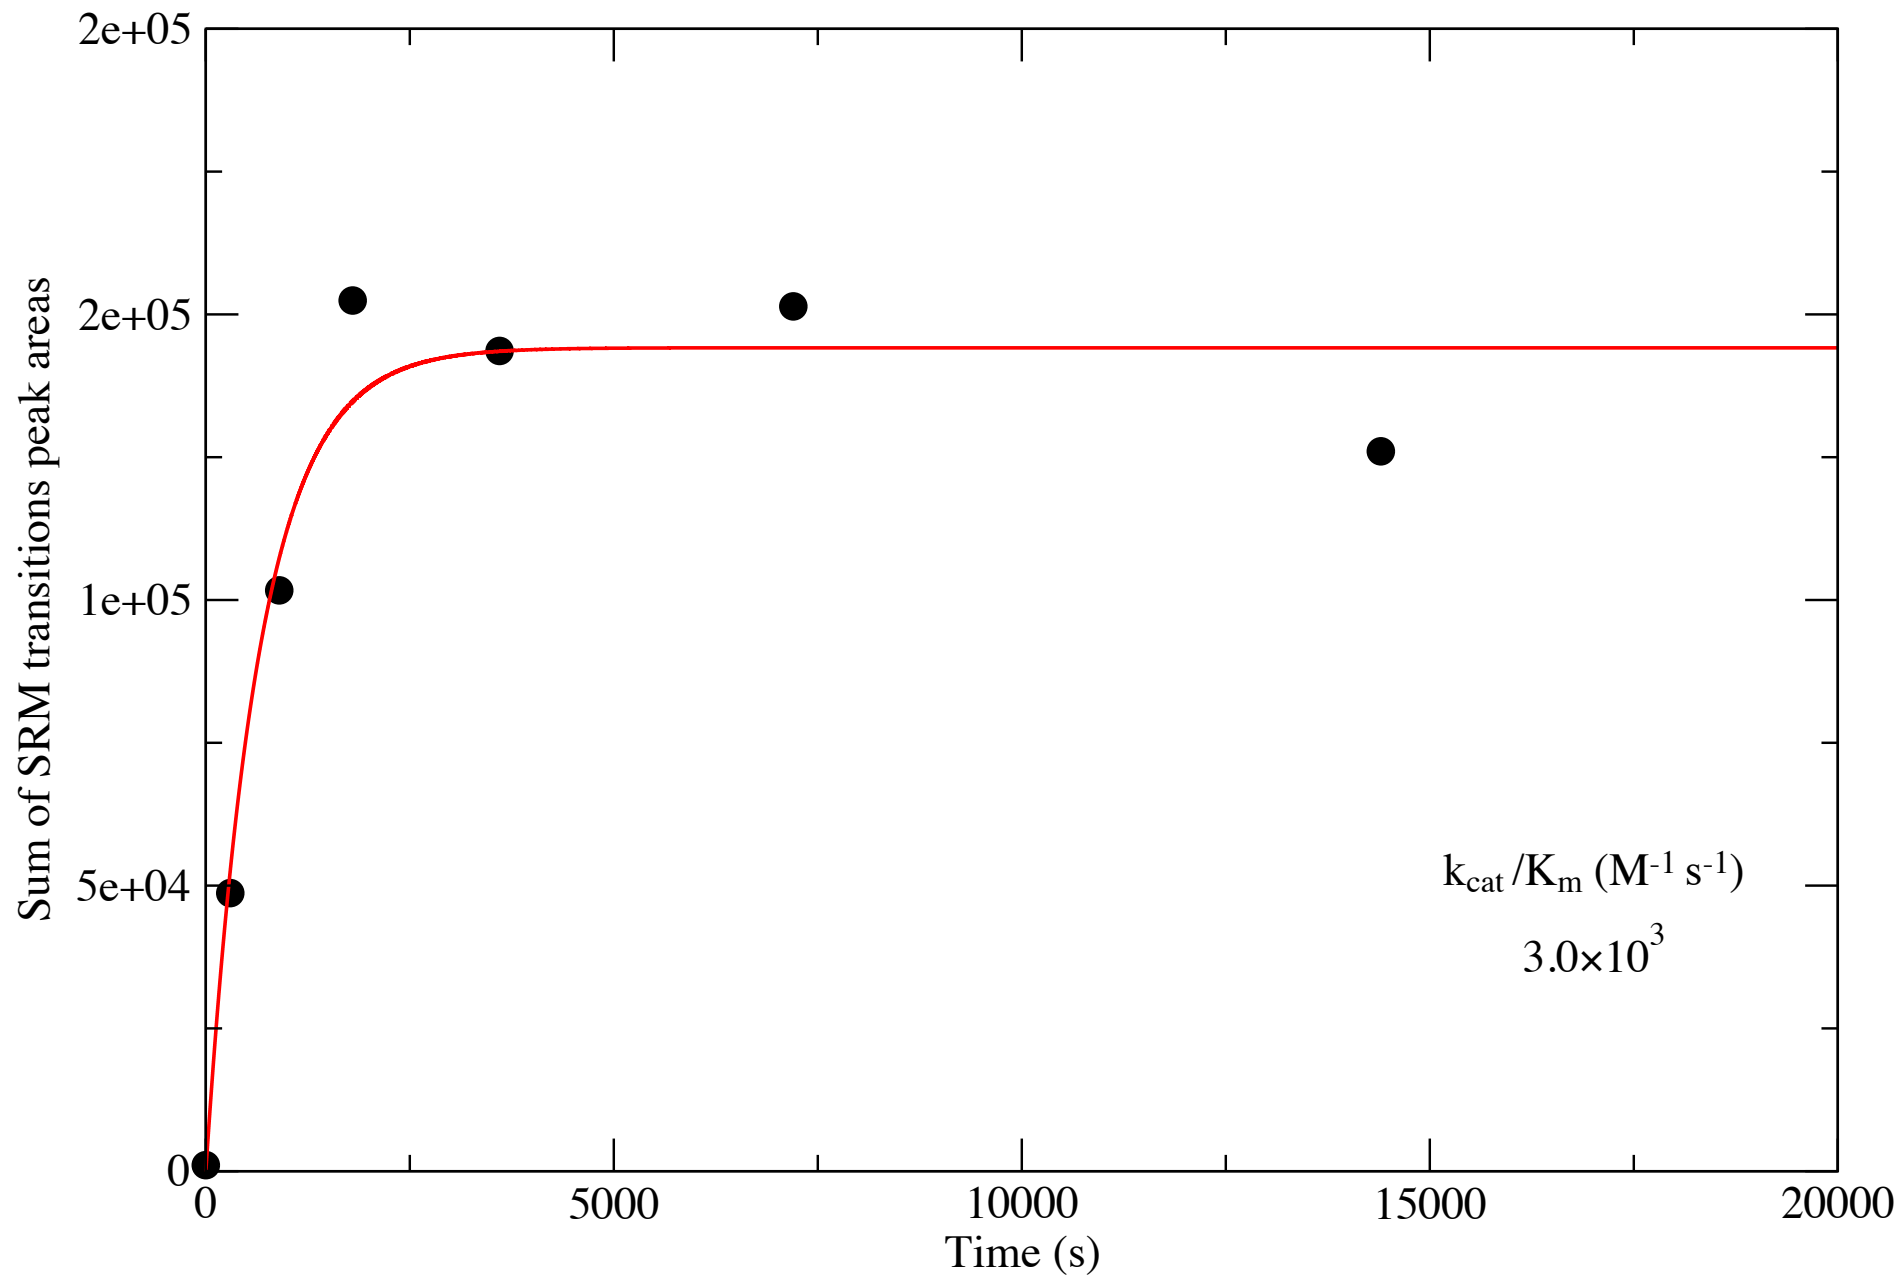

# NOP2\_HUMAN (AQAPDLQR)

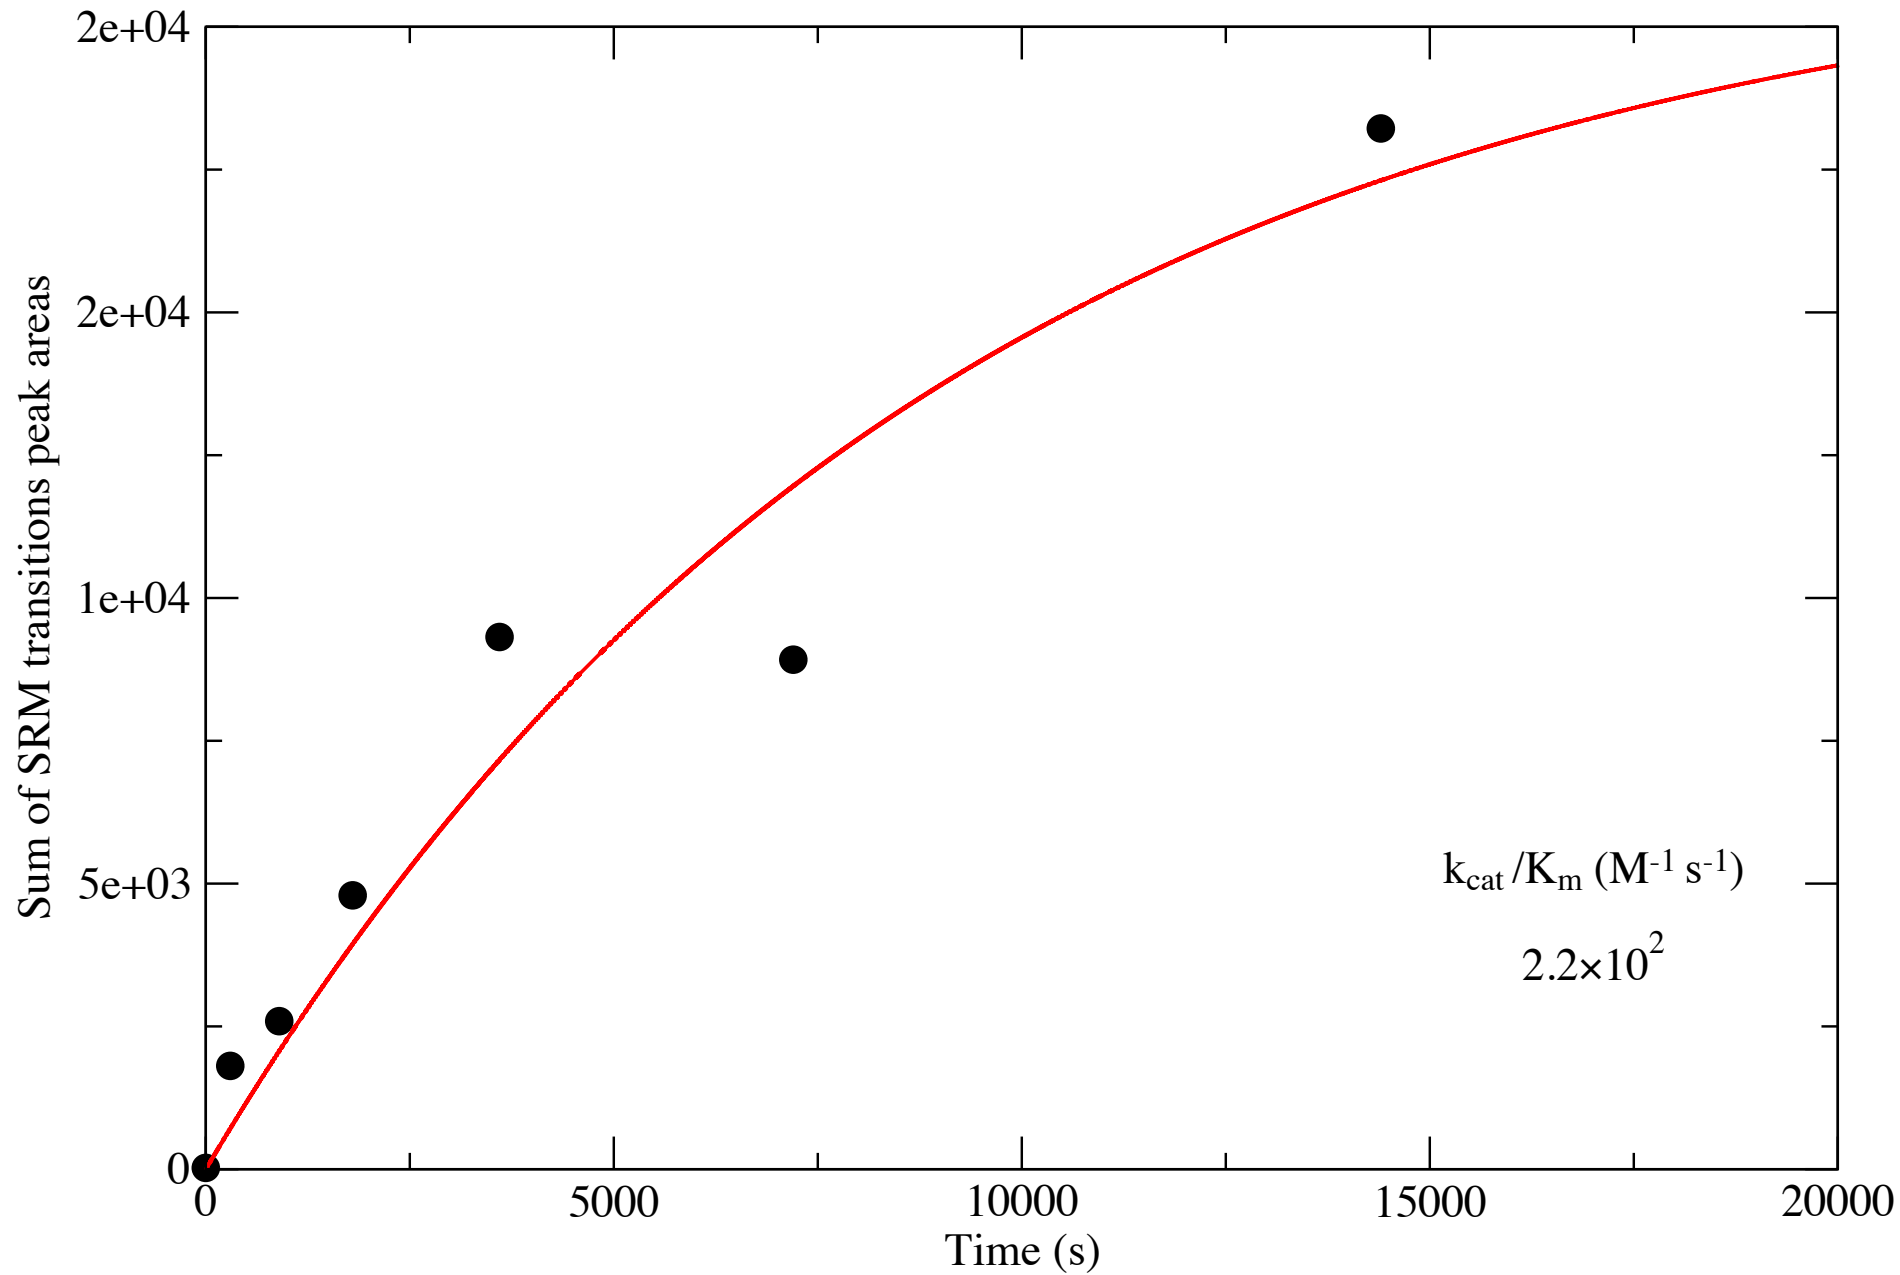

# NOP58\_HUMAN (GLIPGVEPR)

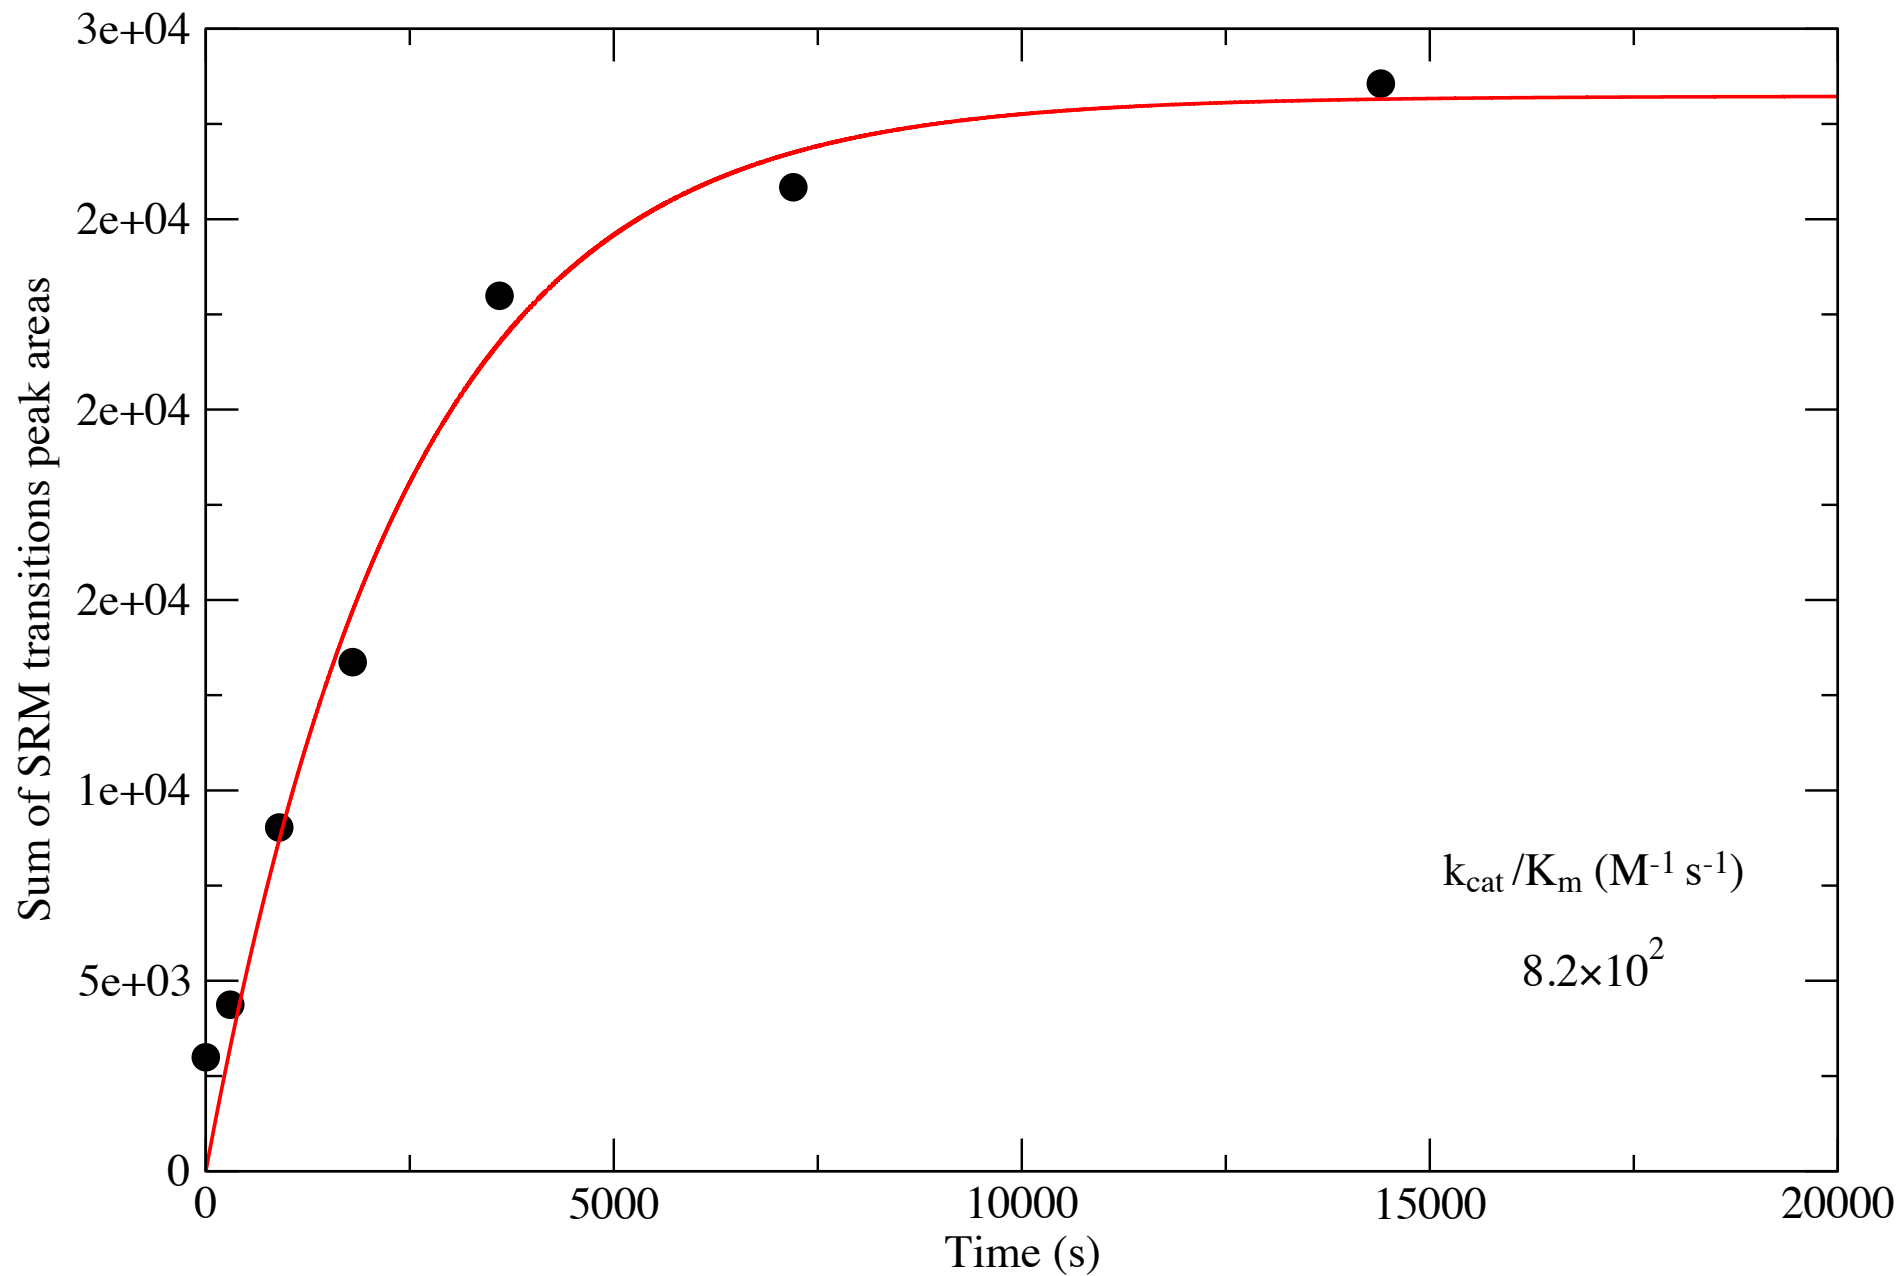

# NOTC1\_HUMAN (GVNTYNCR)

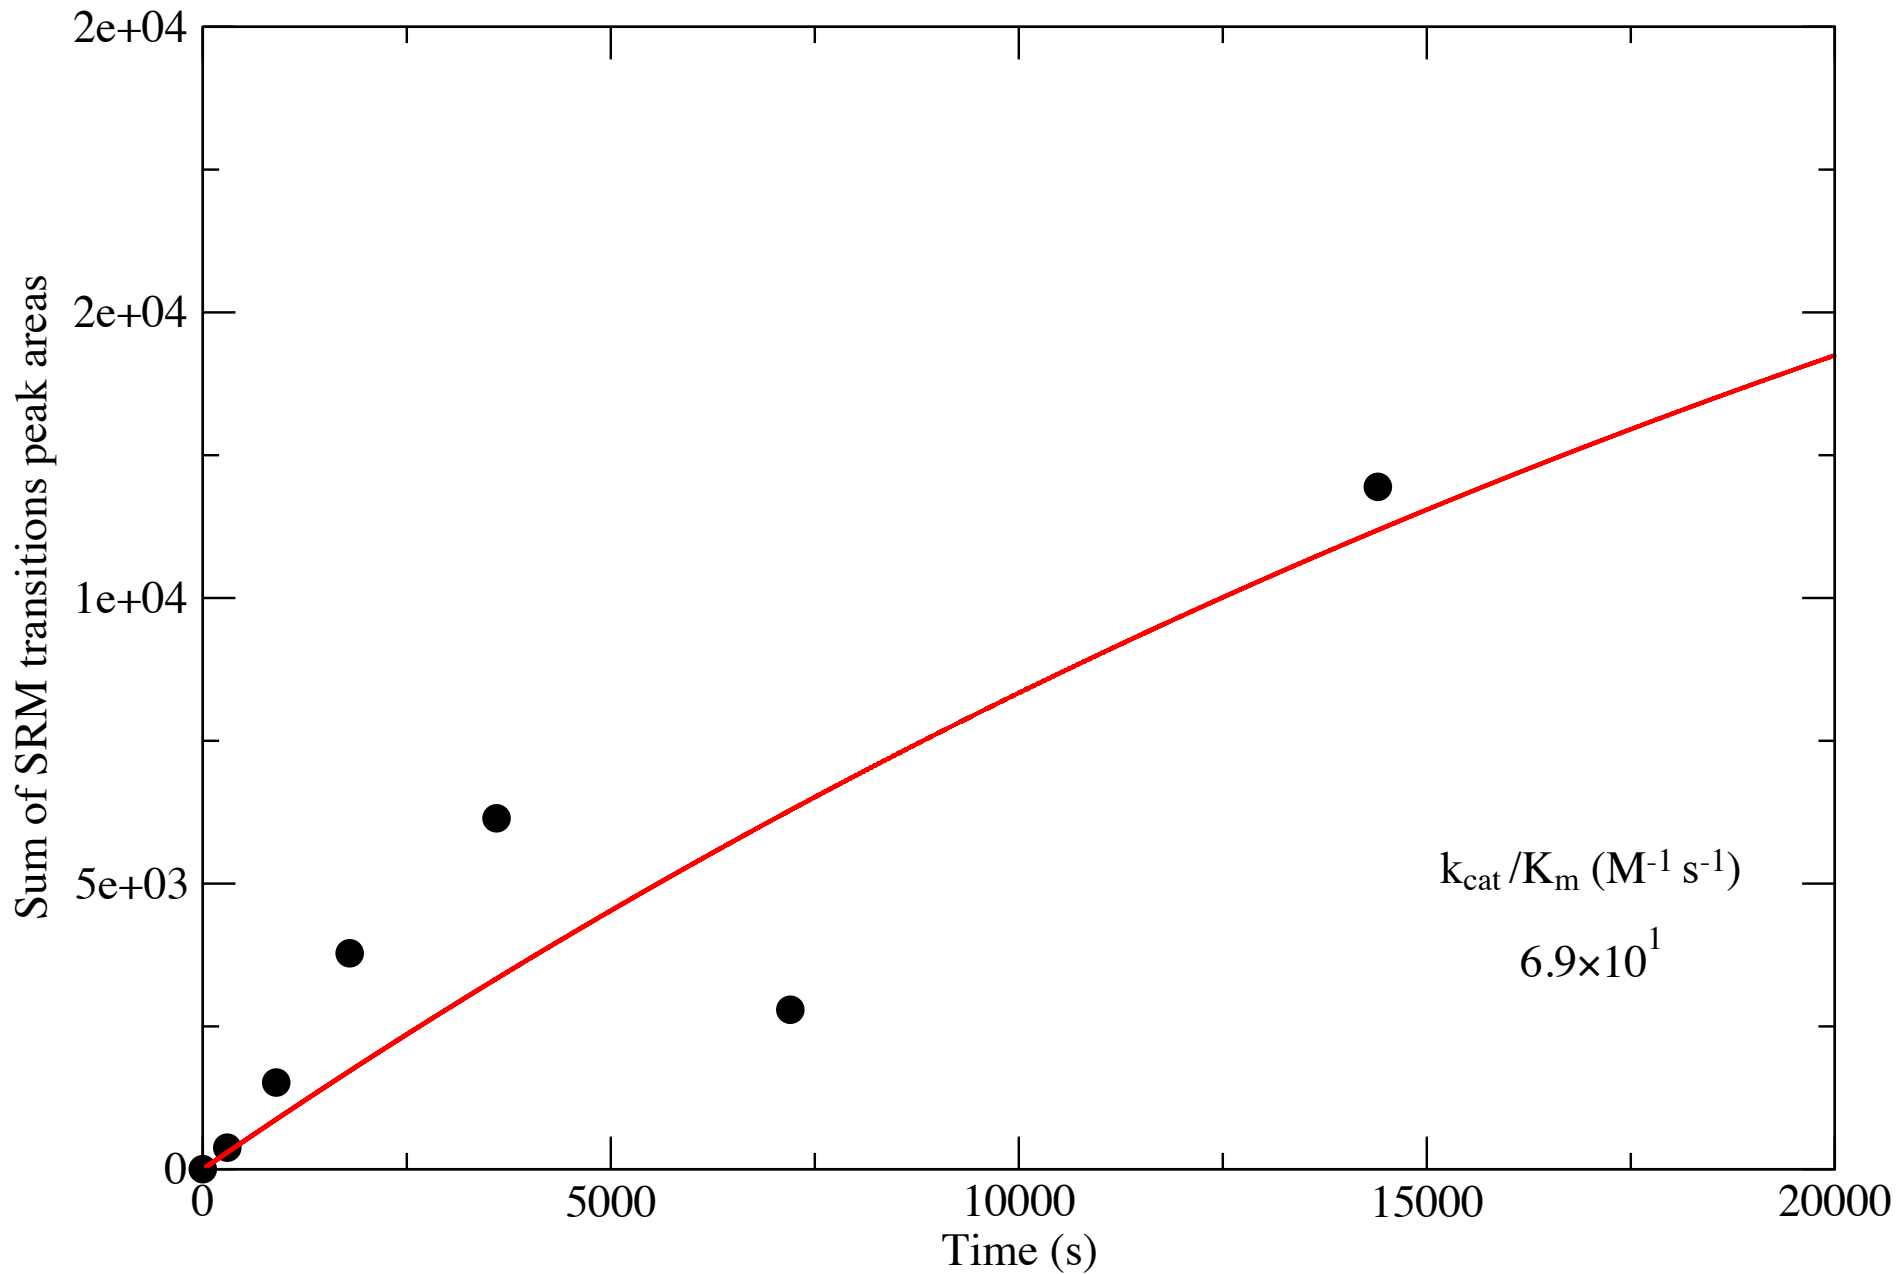



# NPAT\_HUMAN (ASNIVSLK)

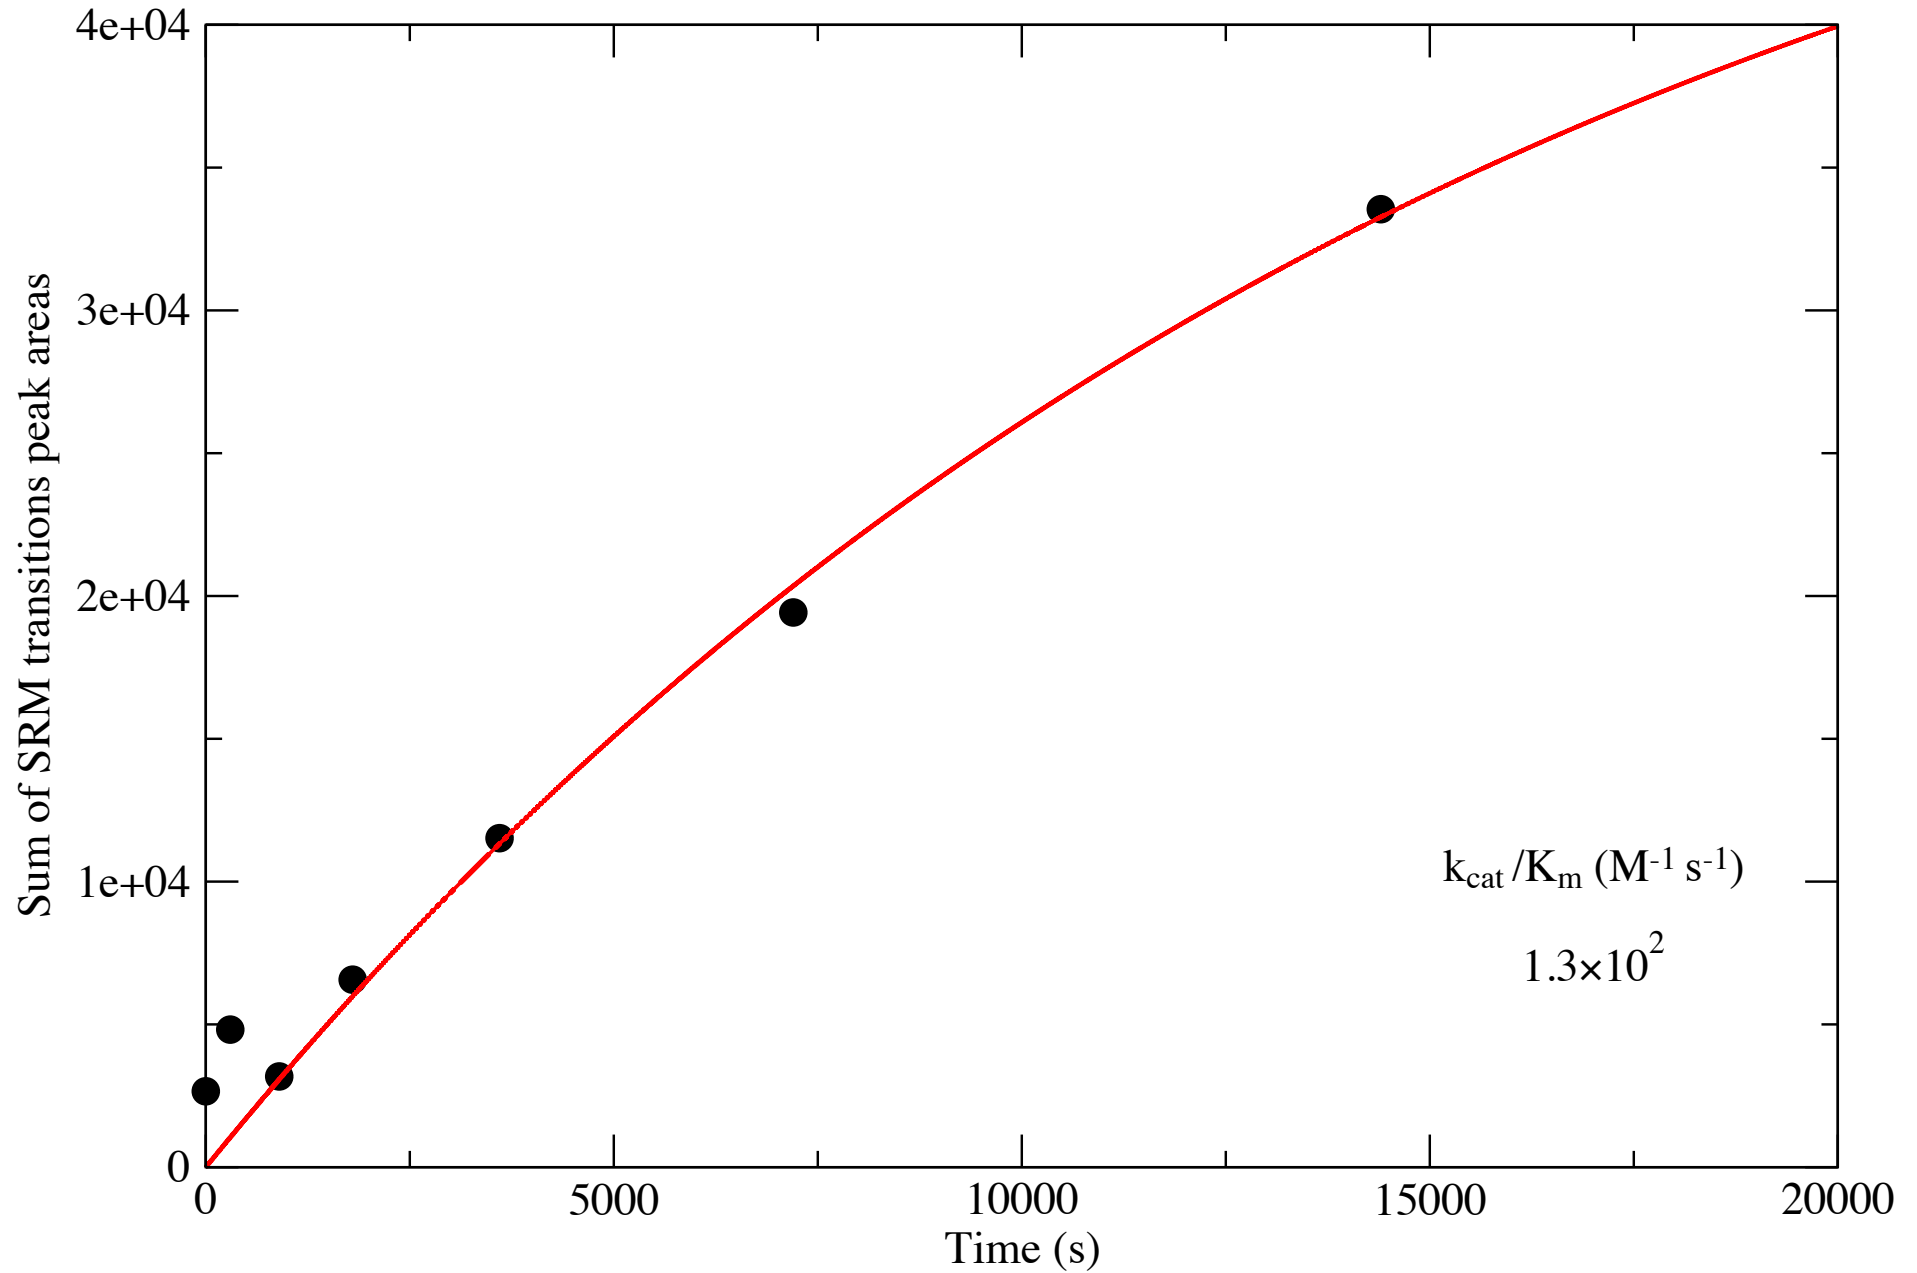

# NUCB2\_HUMAN (GLDPNDFDPK)

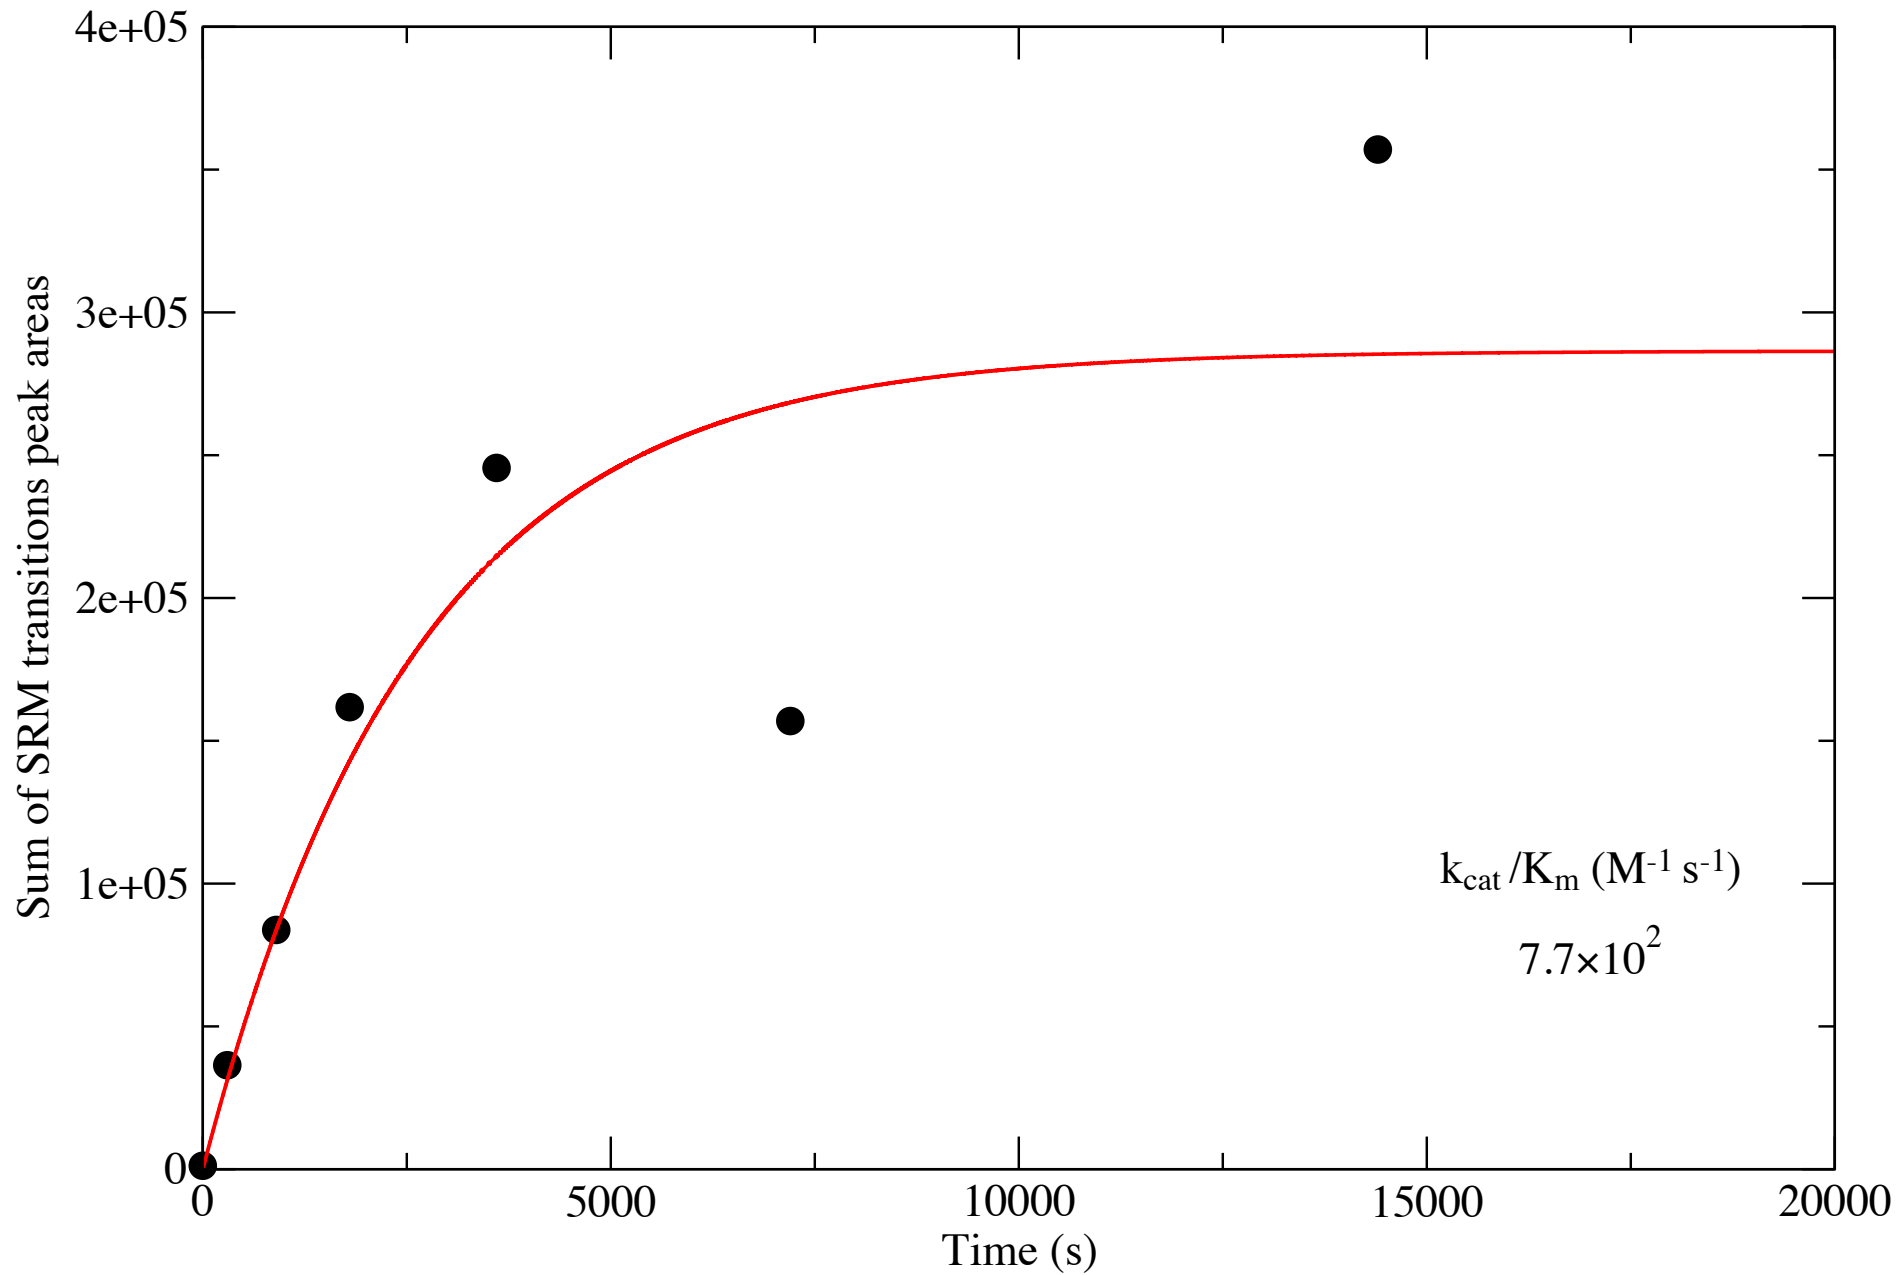

# NUCL\_HUMAN (SSGEEVVIPQKK)

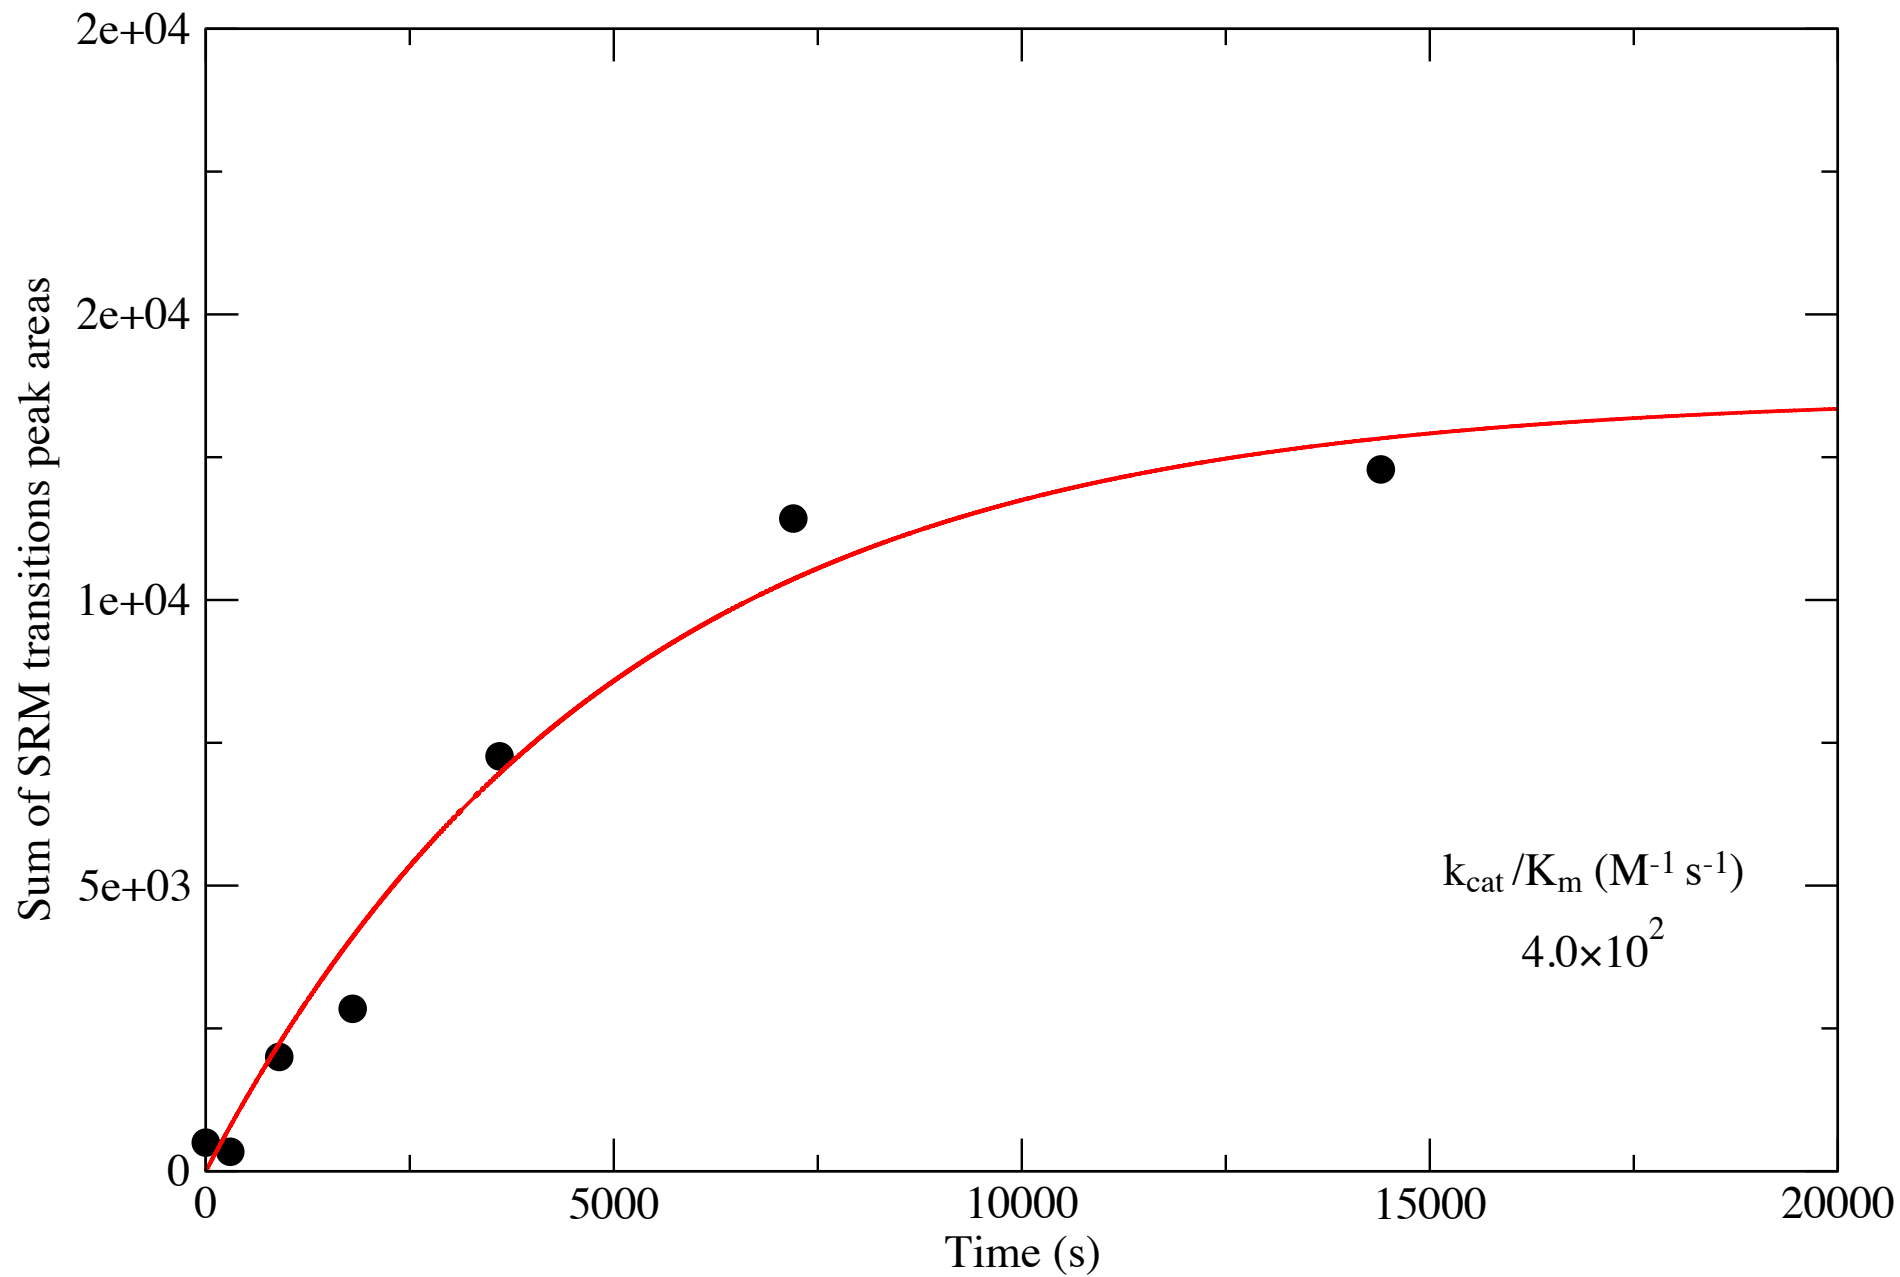

# NUMA1\_HUMAN (SANSSEFYSTR)

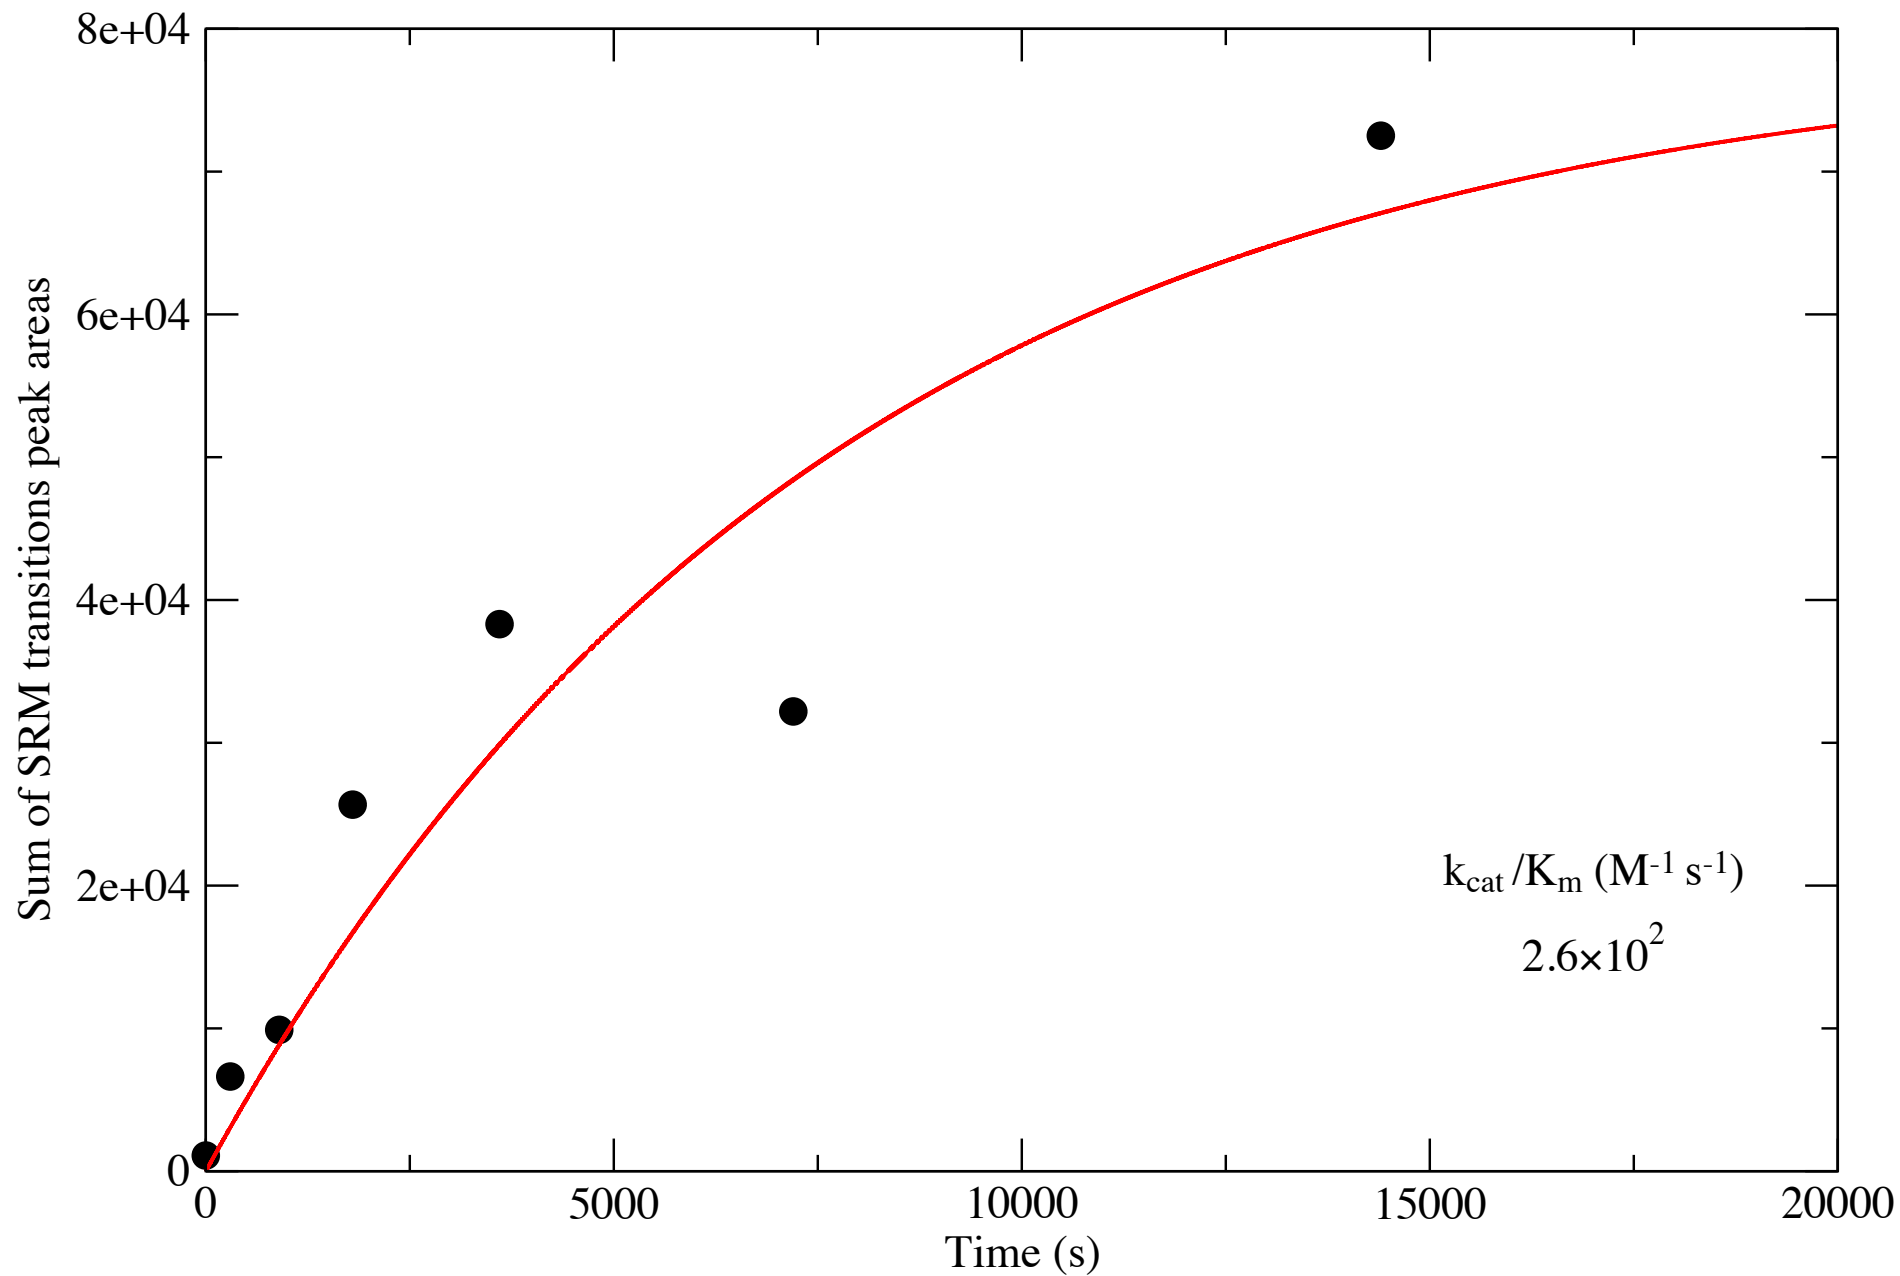

# NUP85\_HUMAN (GEPTVTLIPGVNSK)

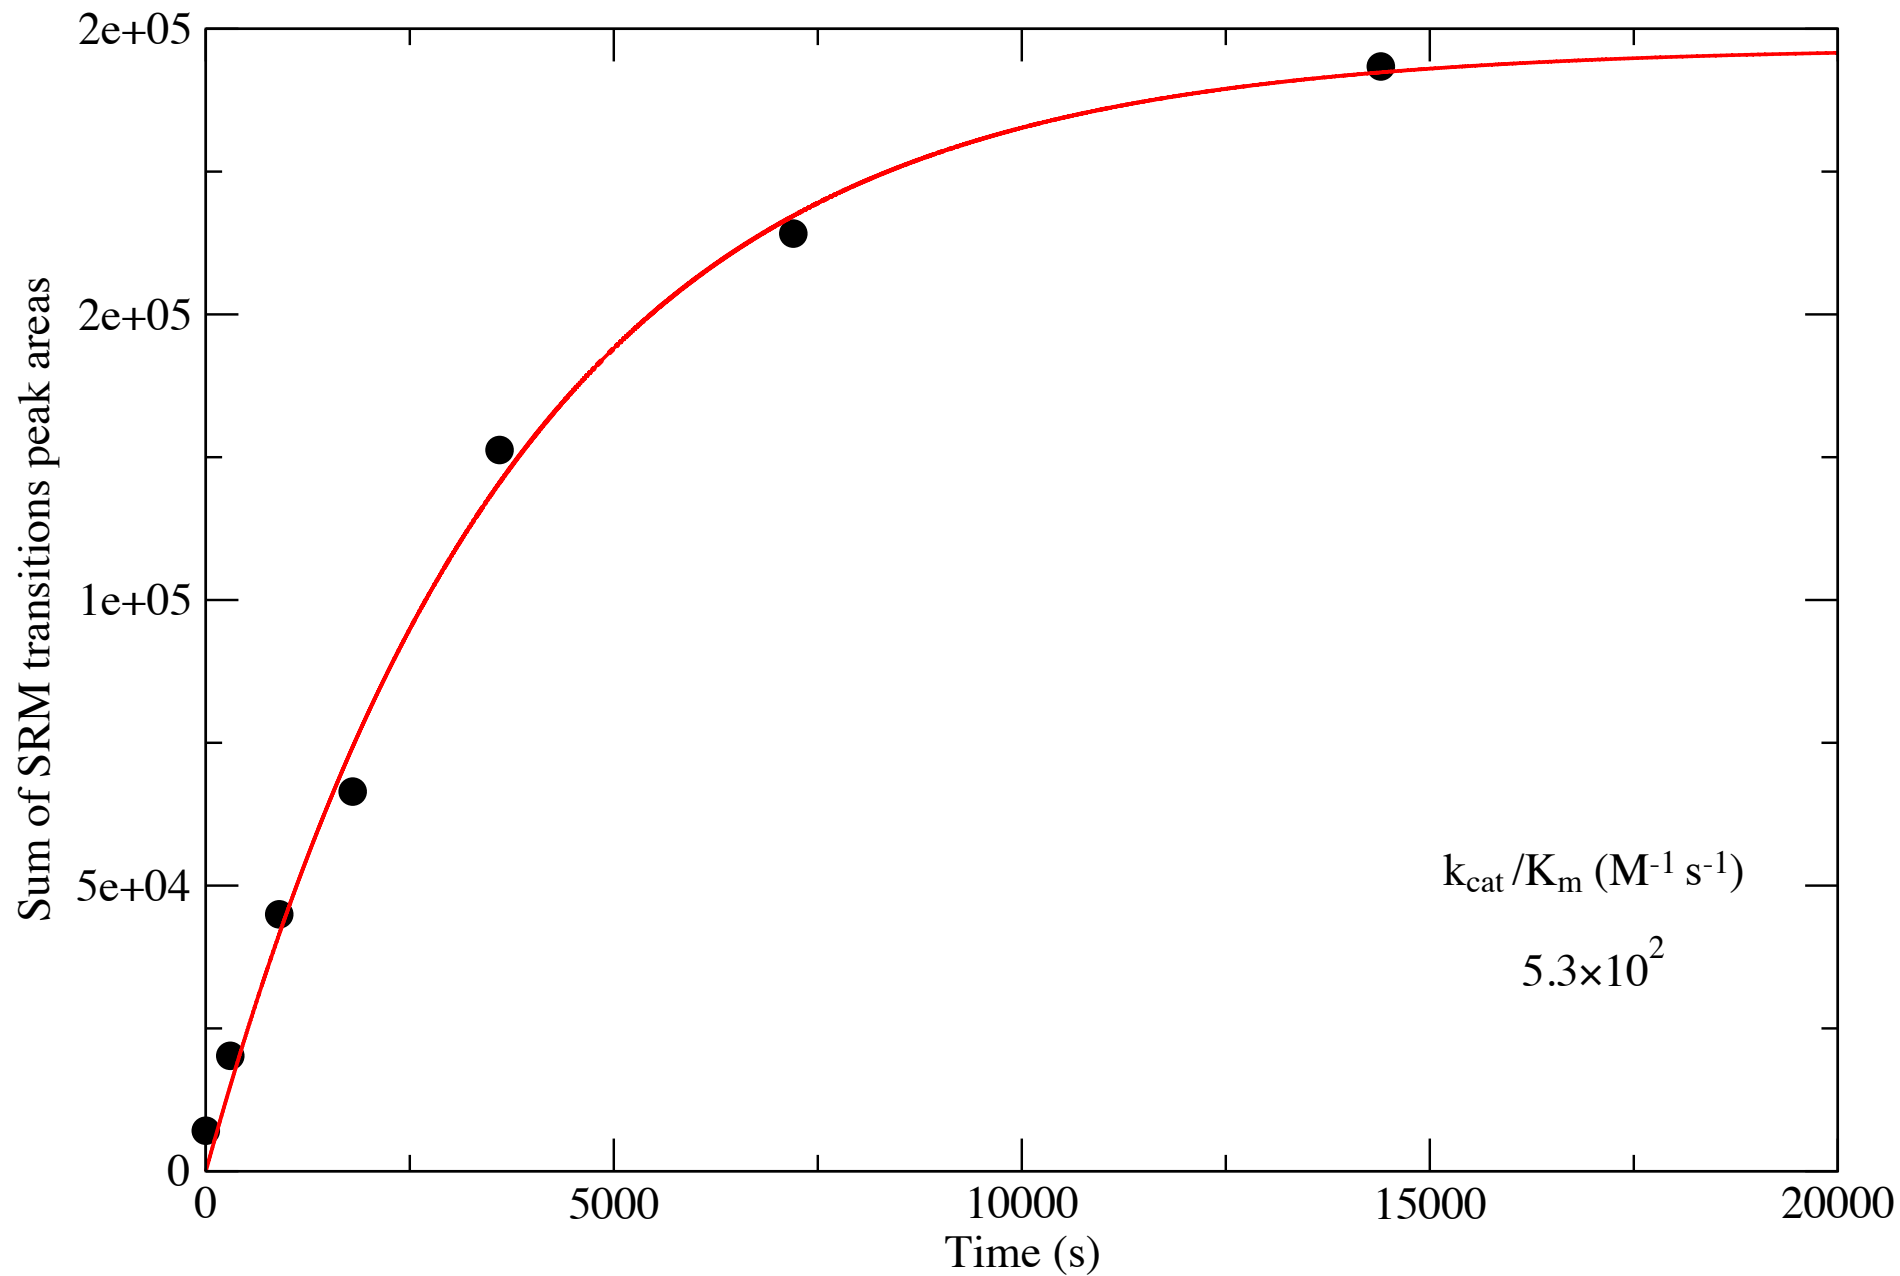

# NXF1\_HUMAN (GDVAMSDAQDGPR)

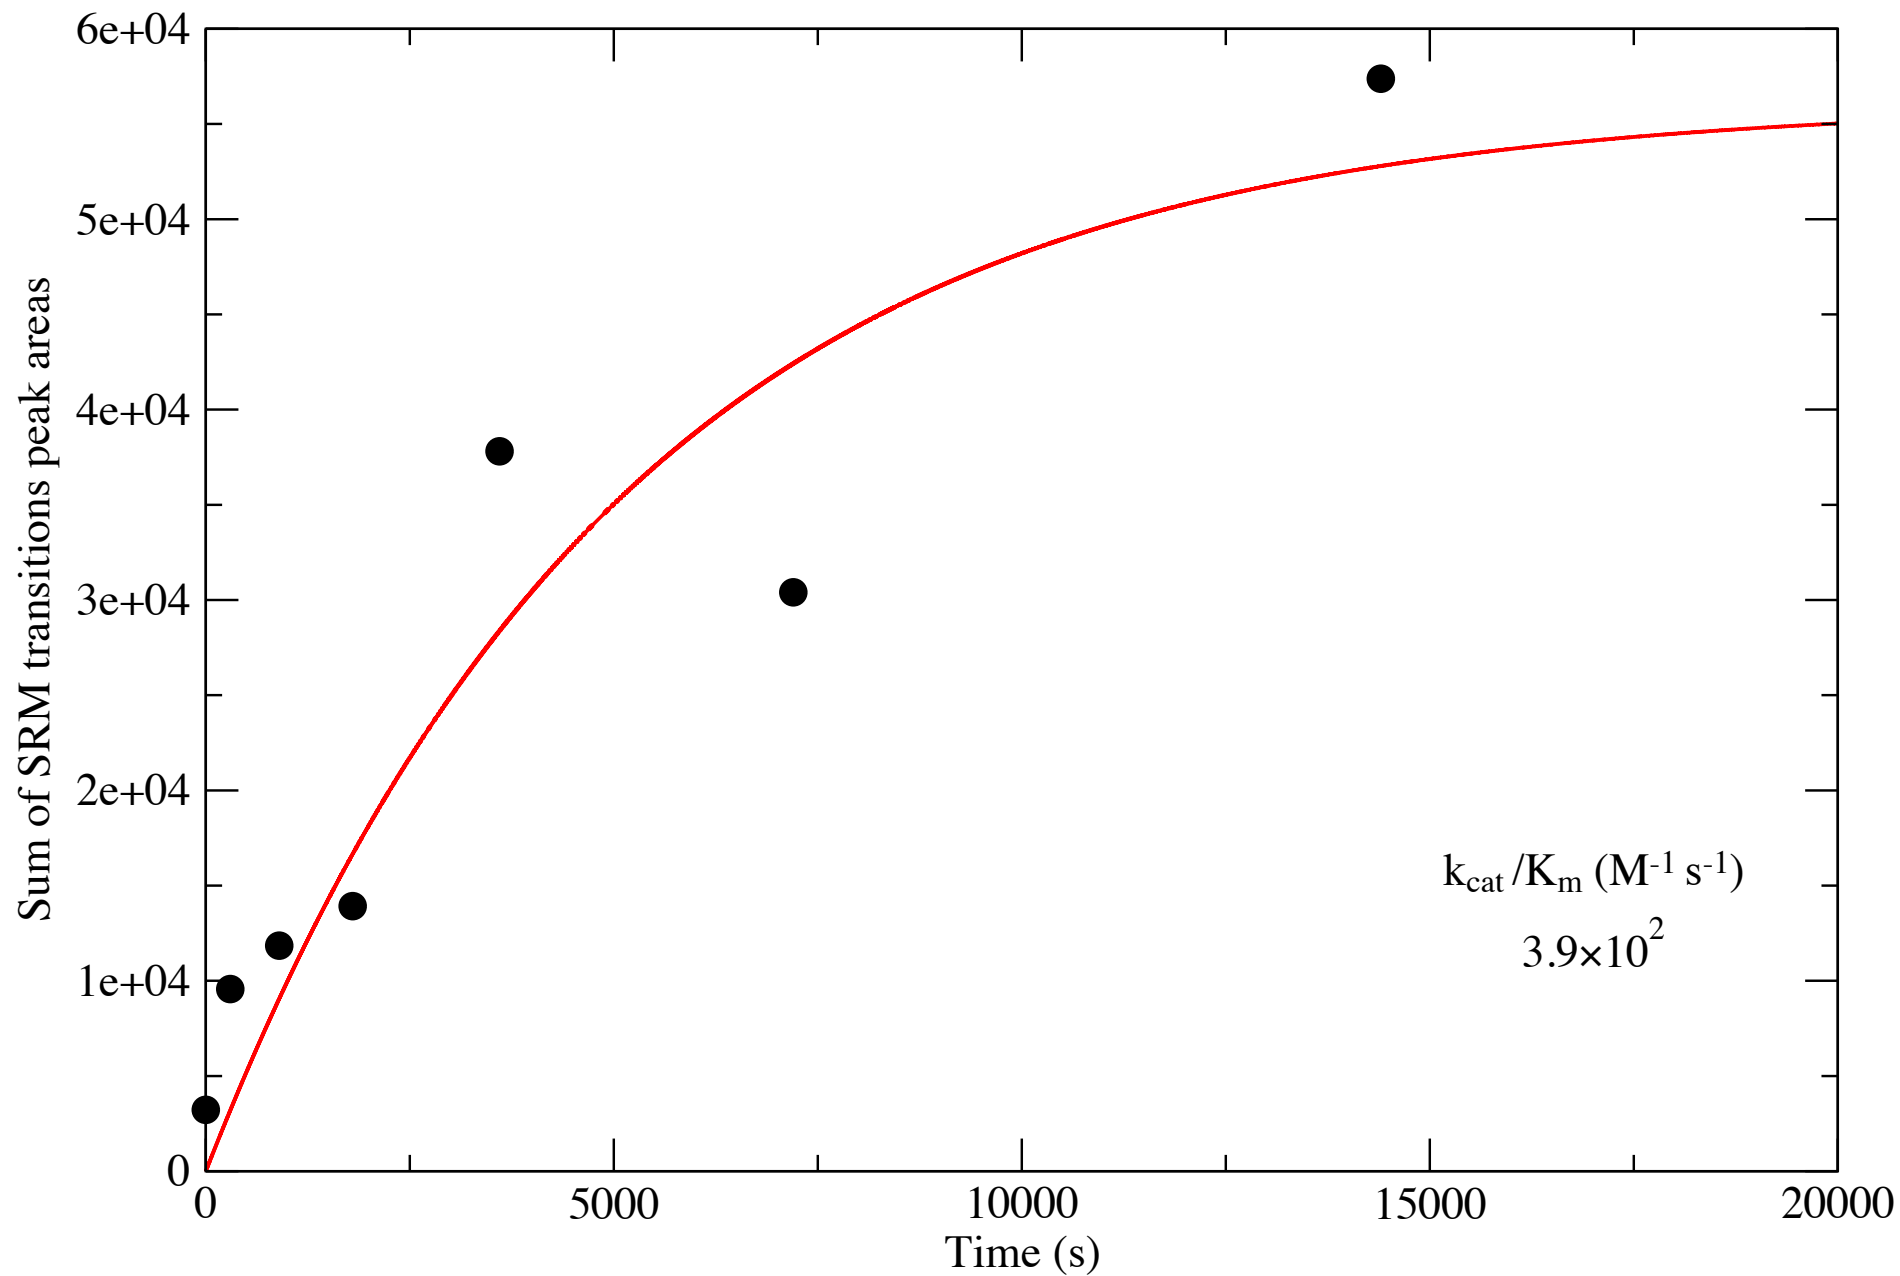

# OSBL3\_HUMAN (SSSGVFDSISSR)

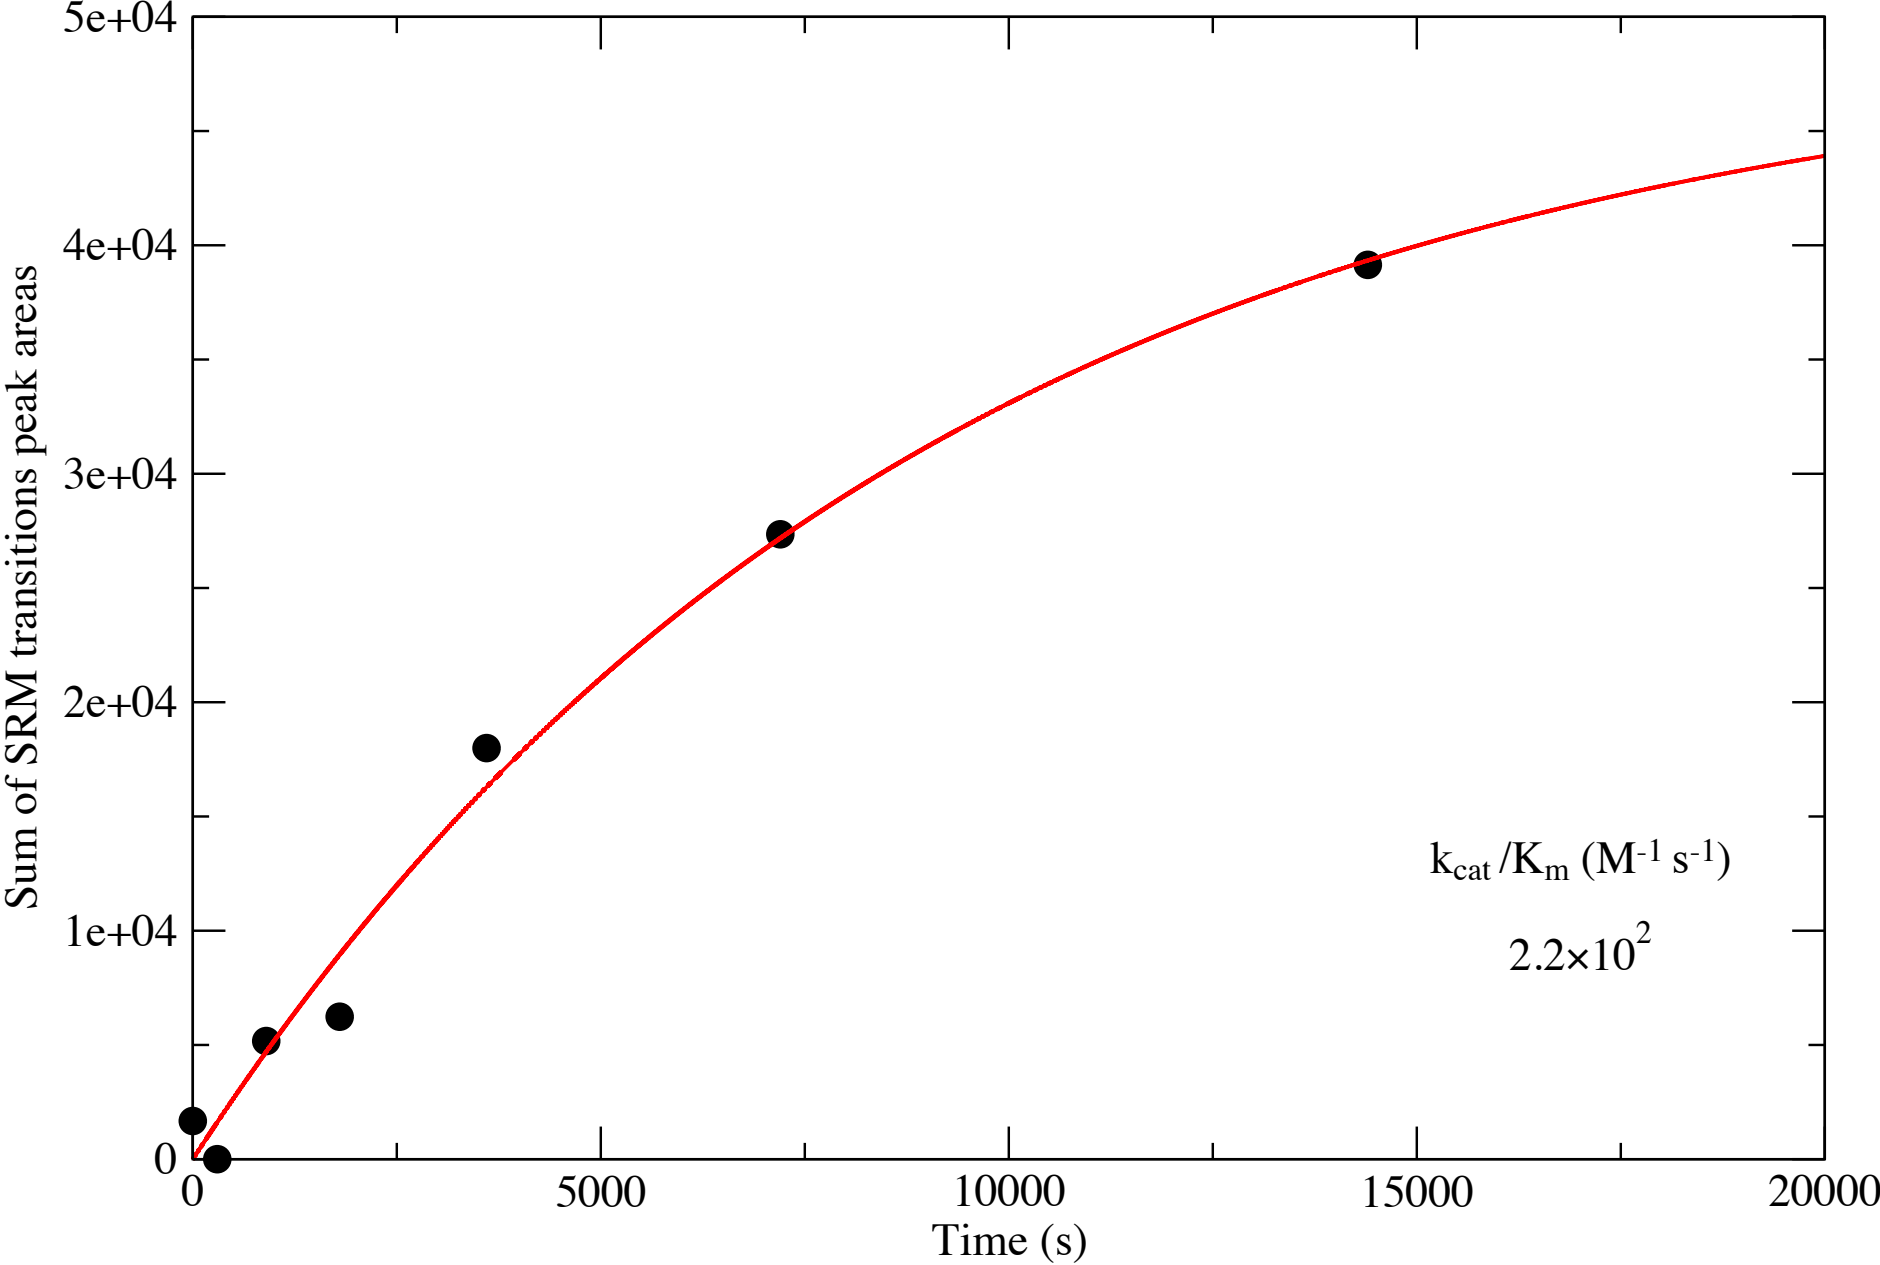

# PAK2\_HUMAN (GFPSGTPALNAK)

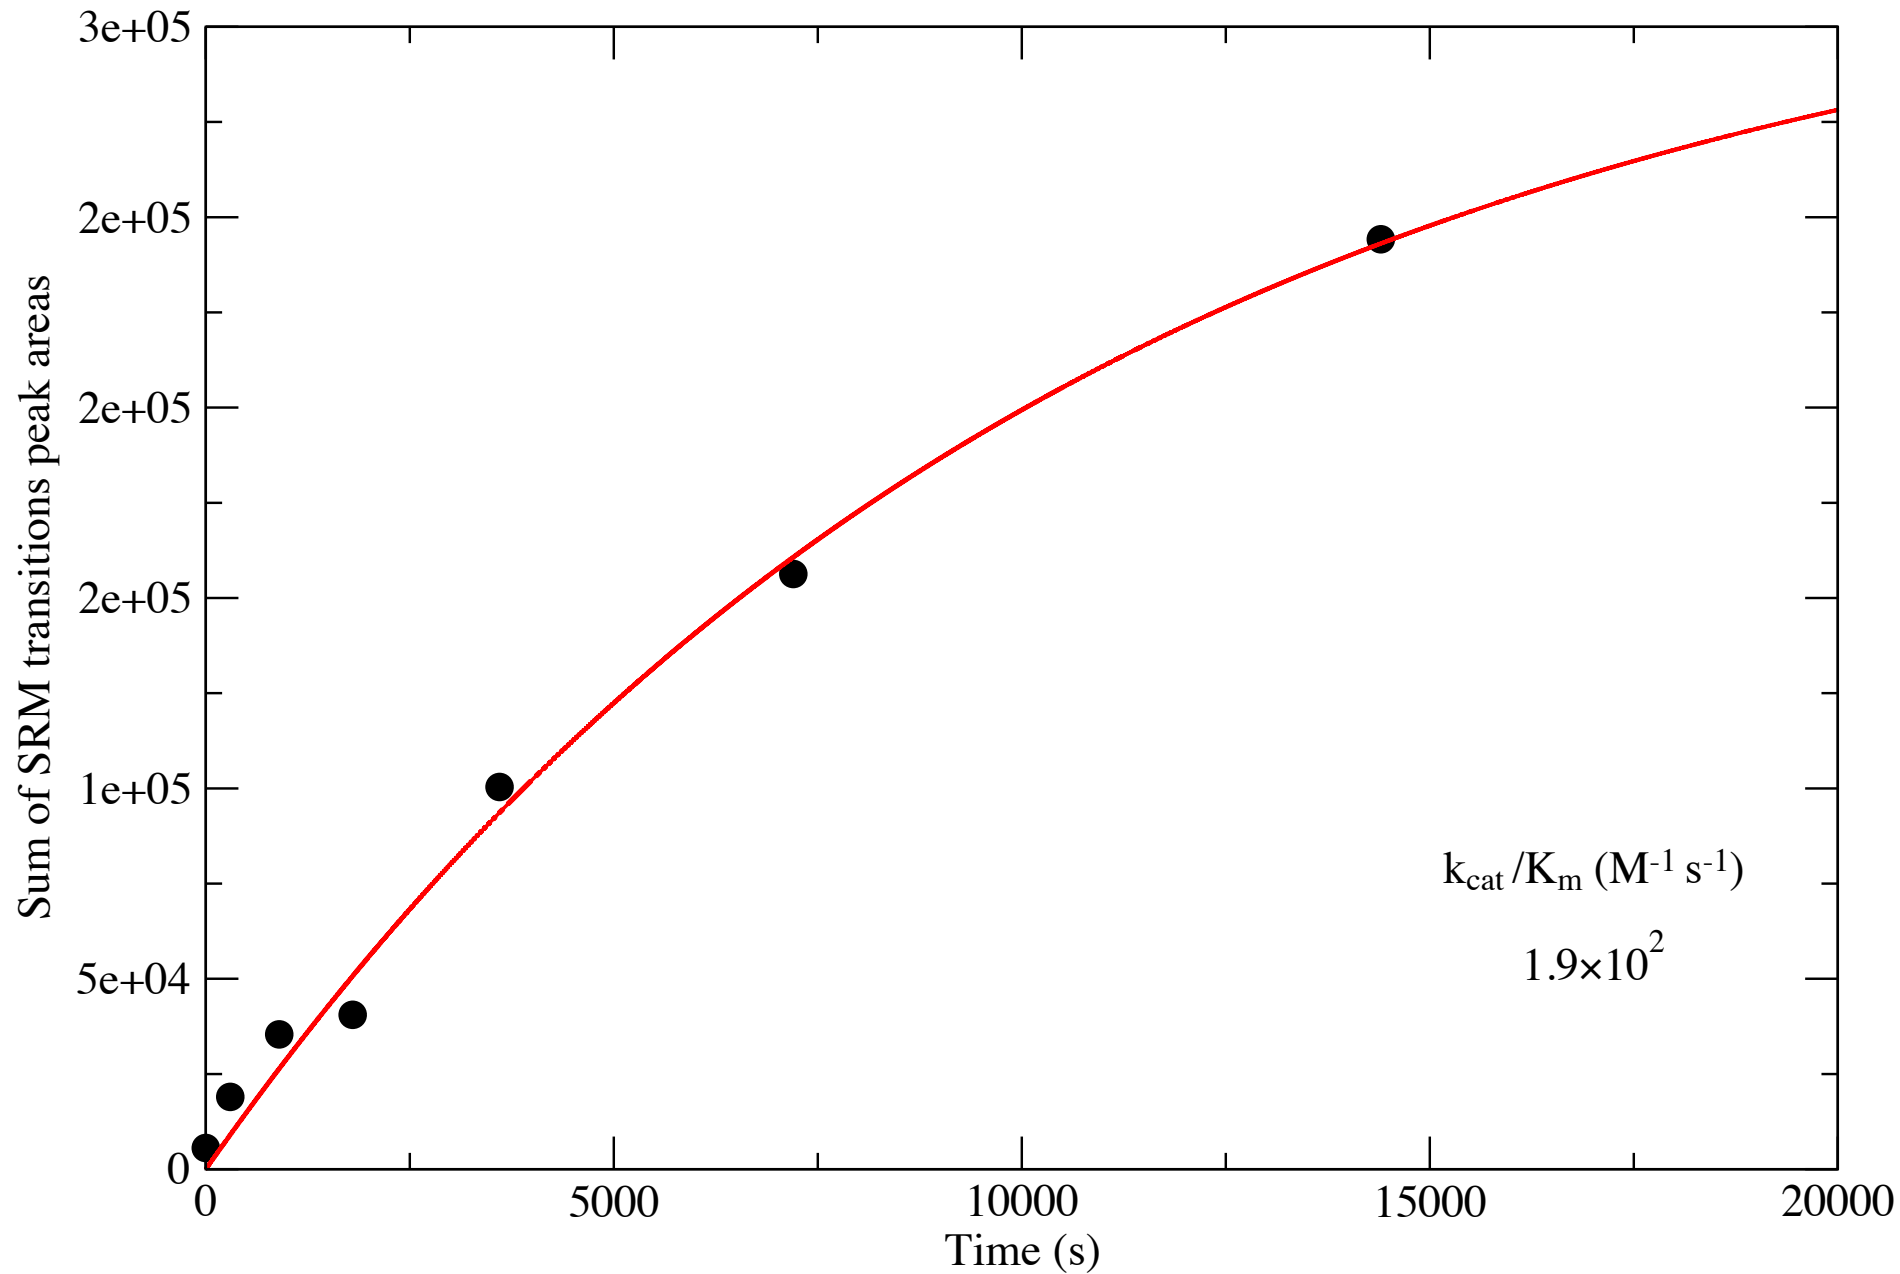



# PARK7\_HUMAN (GLILTSR)

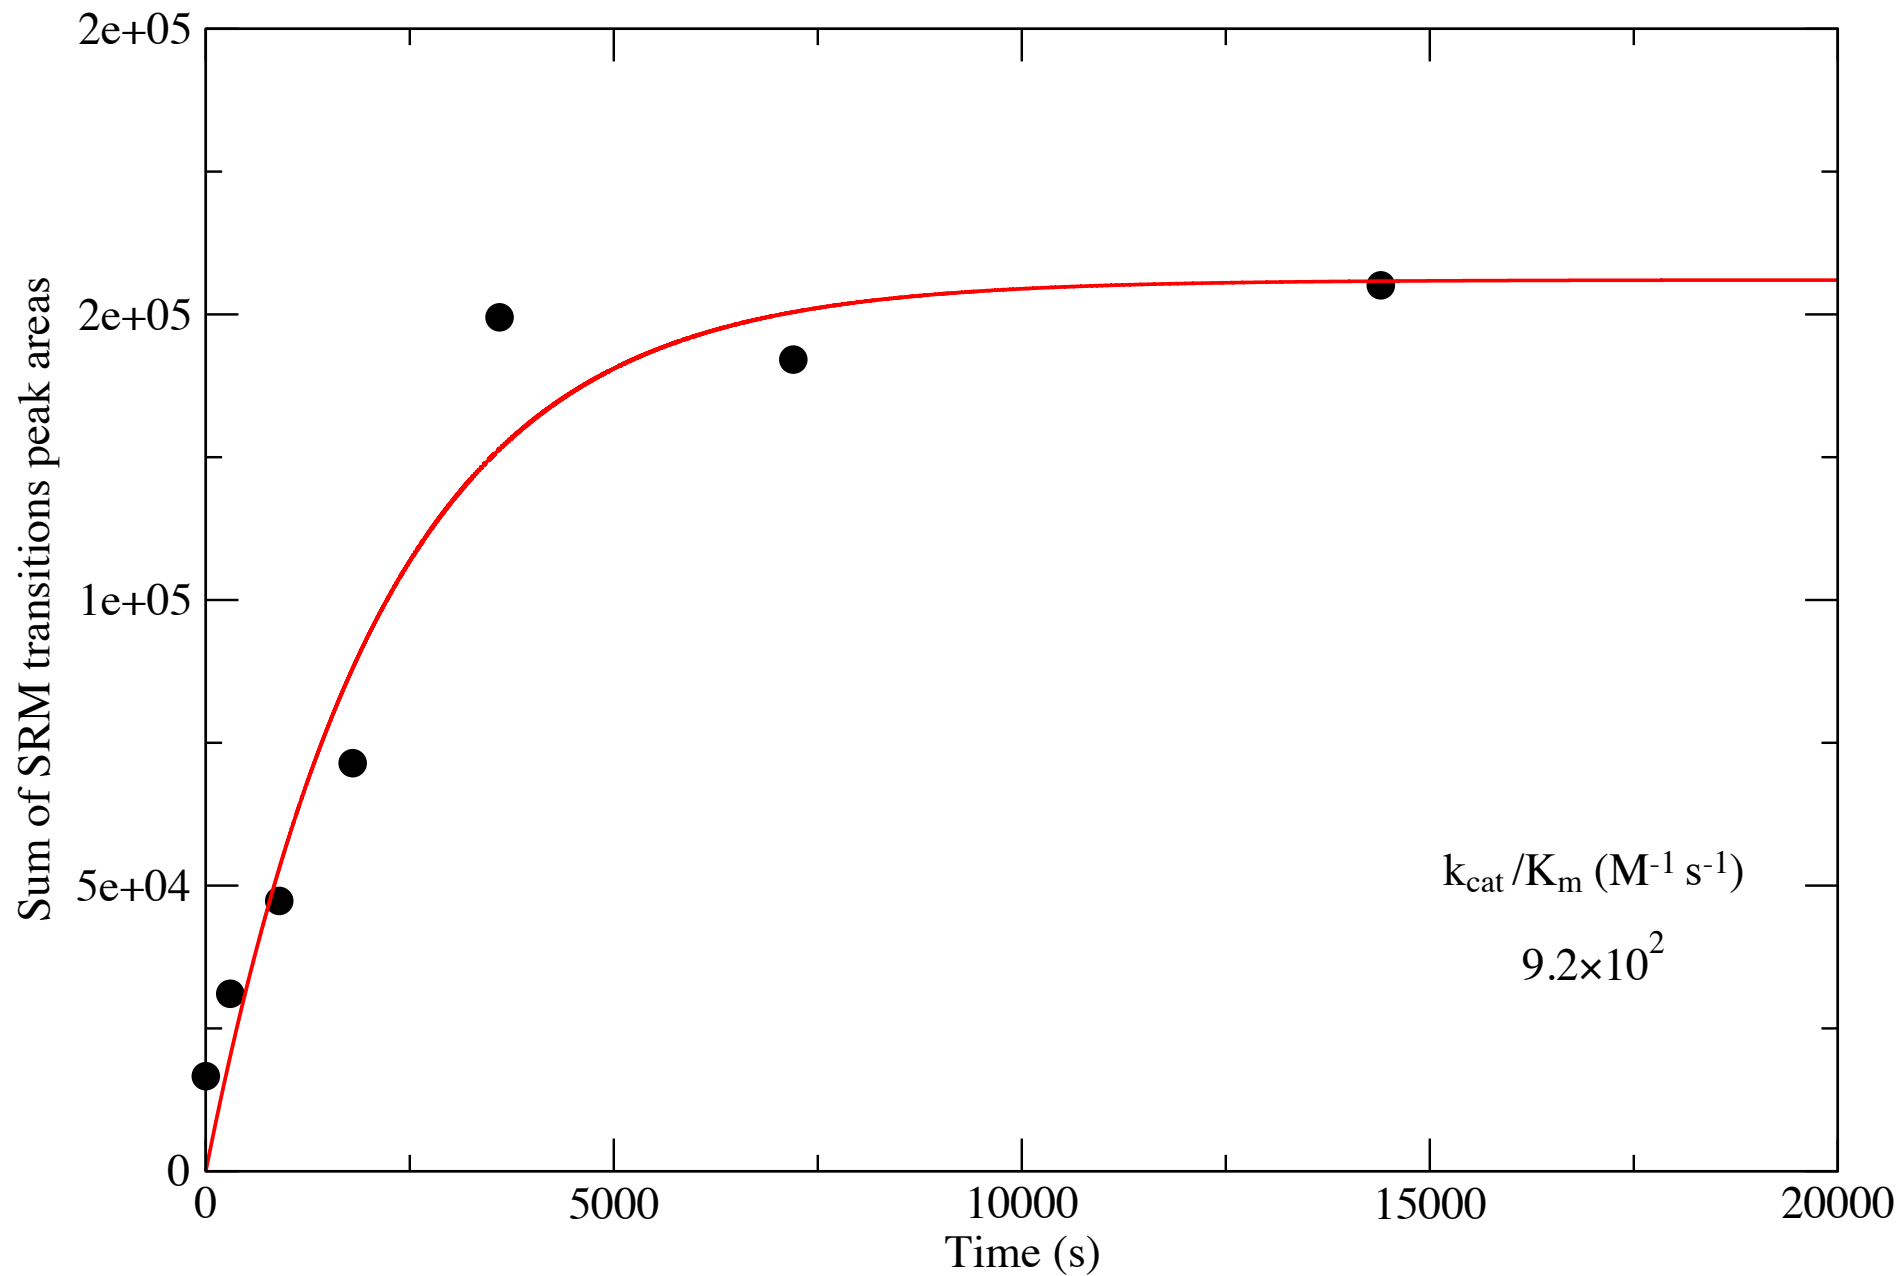

# PARP1\_HUMAN (GFSELR)

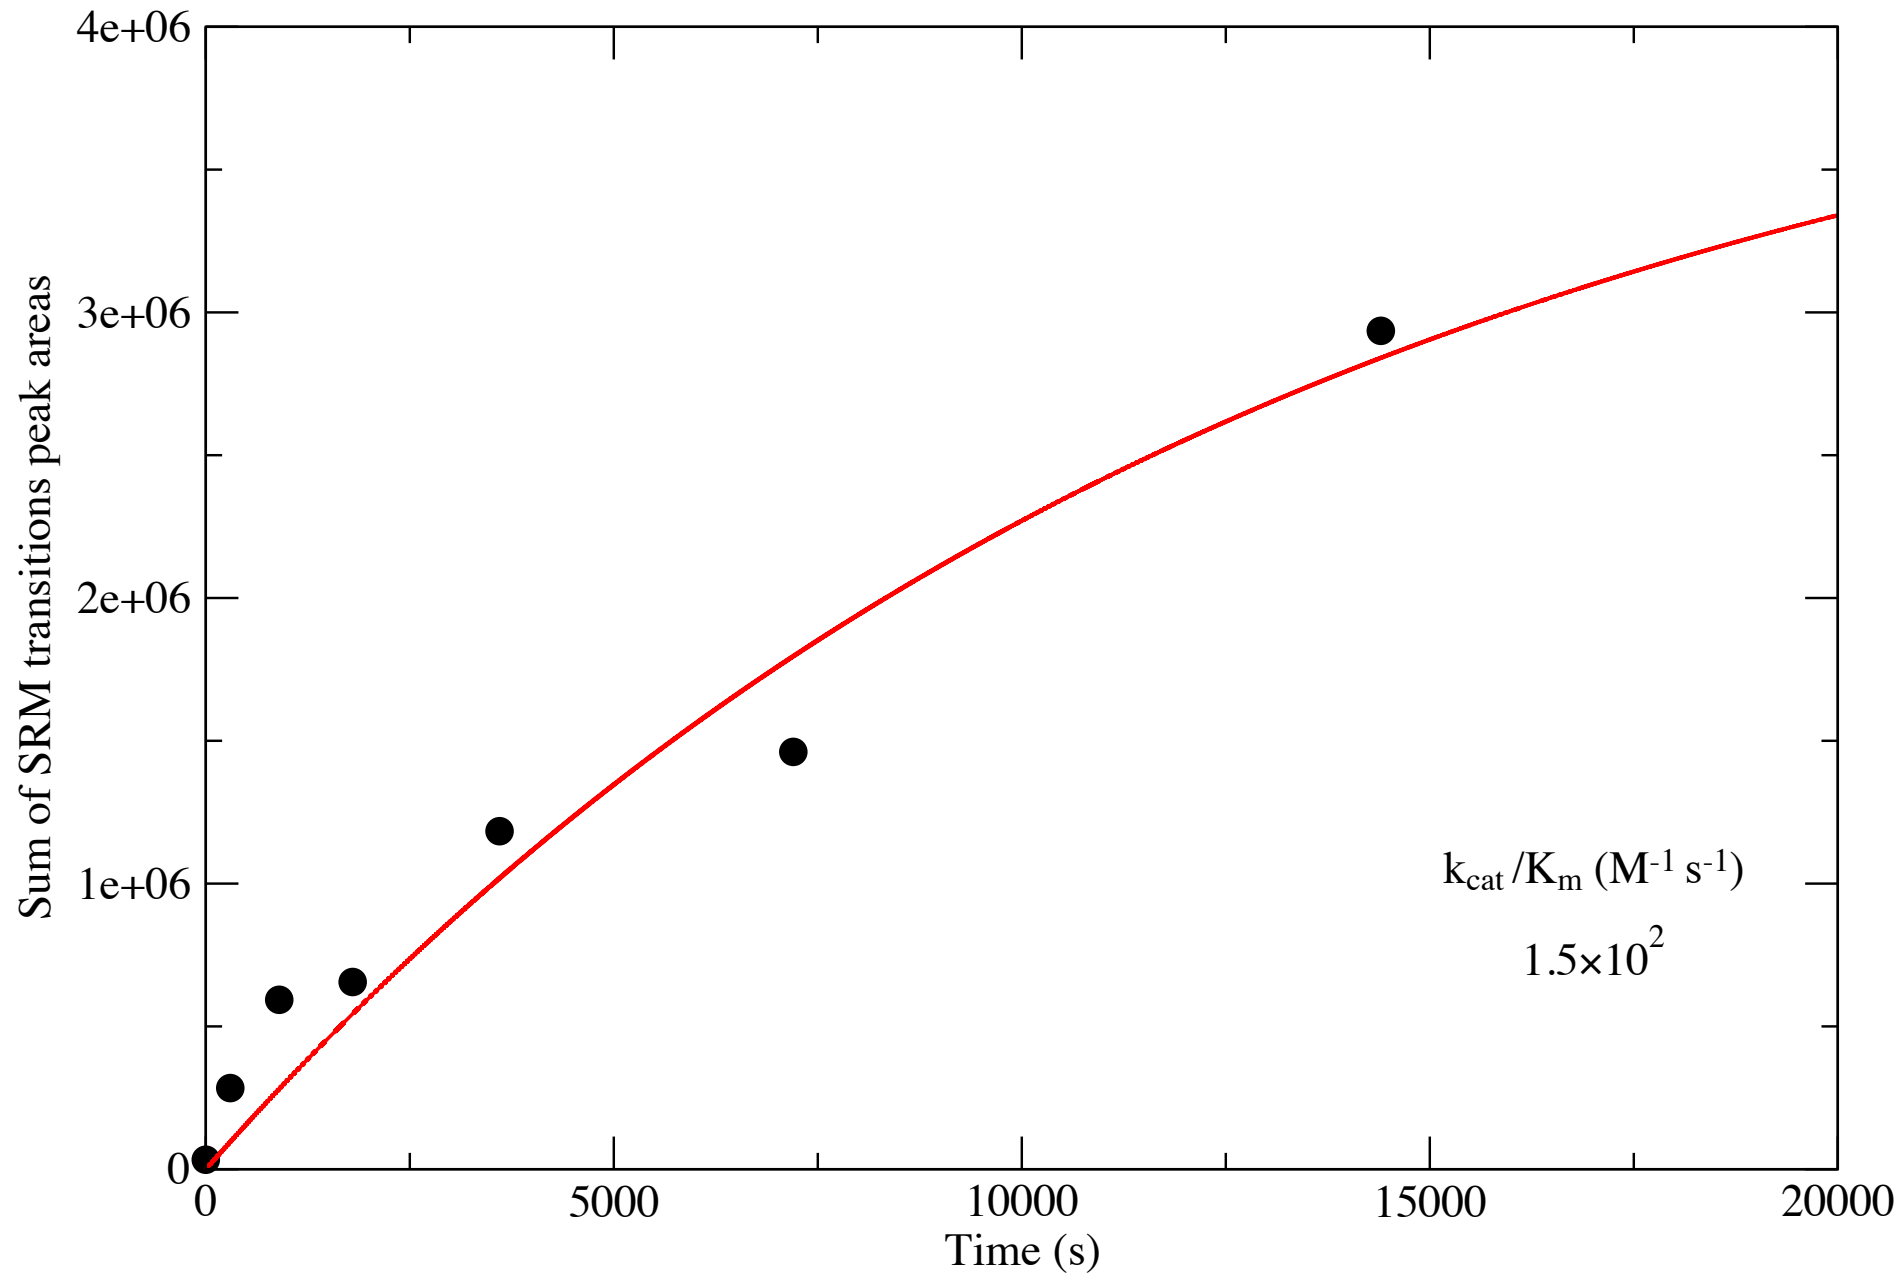

# PARP1\_HUMAN (GFSELRWDDQQK)

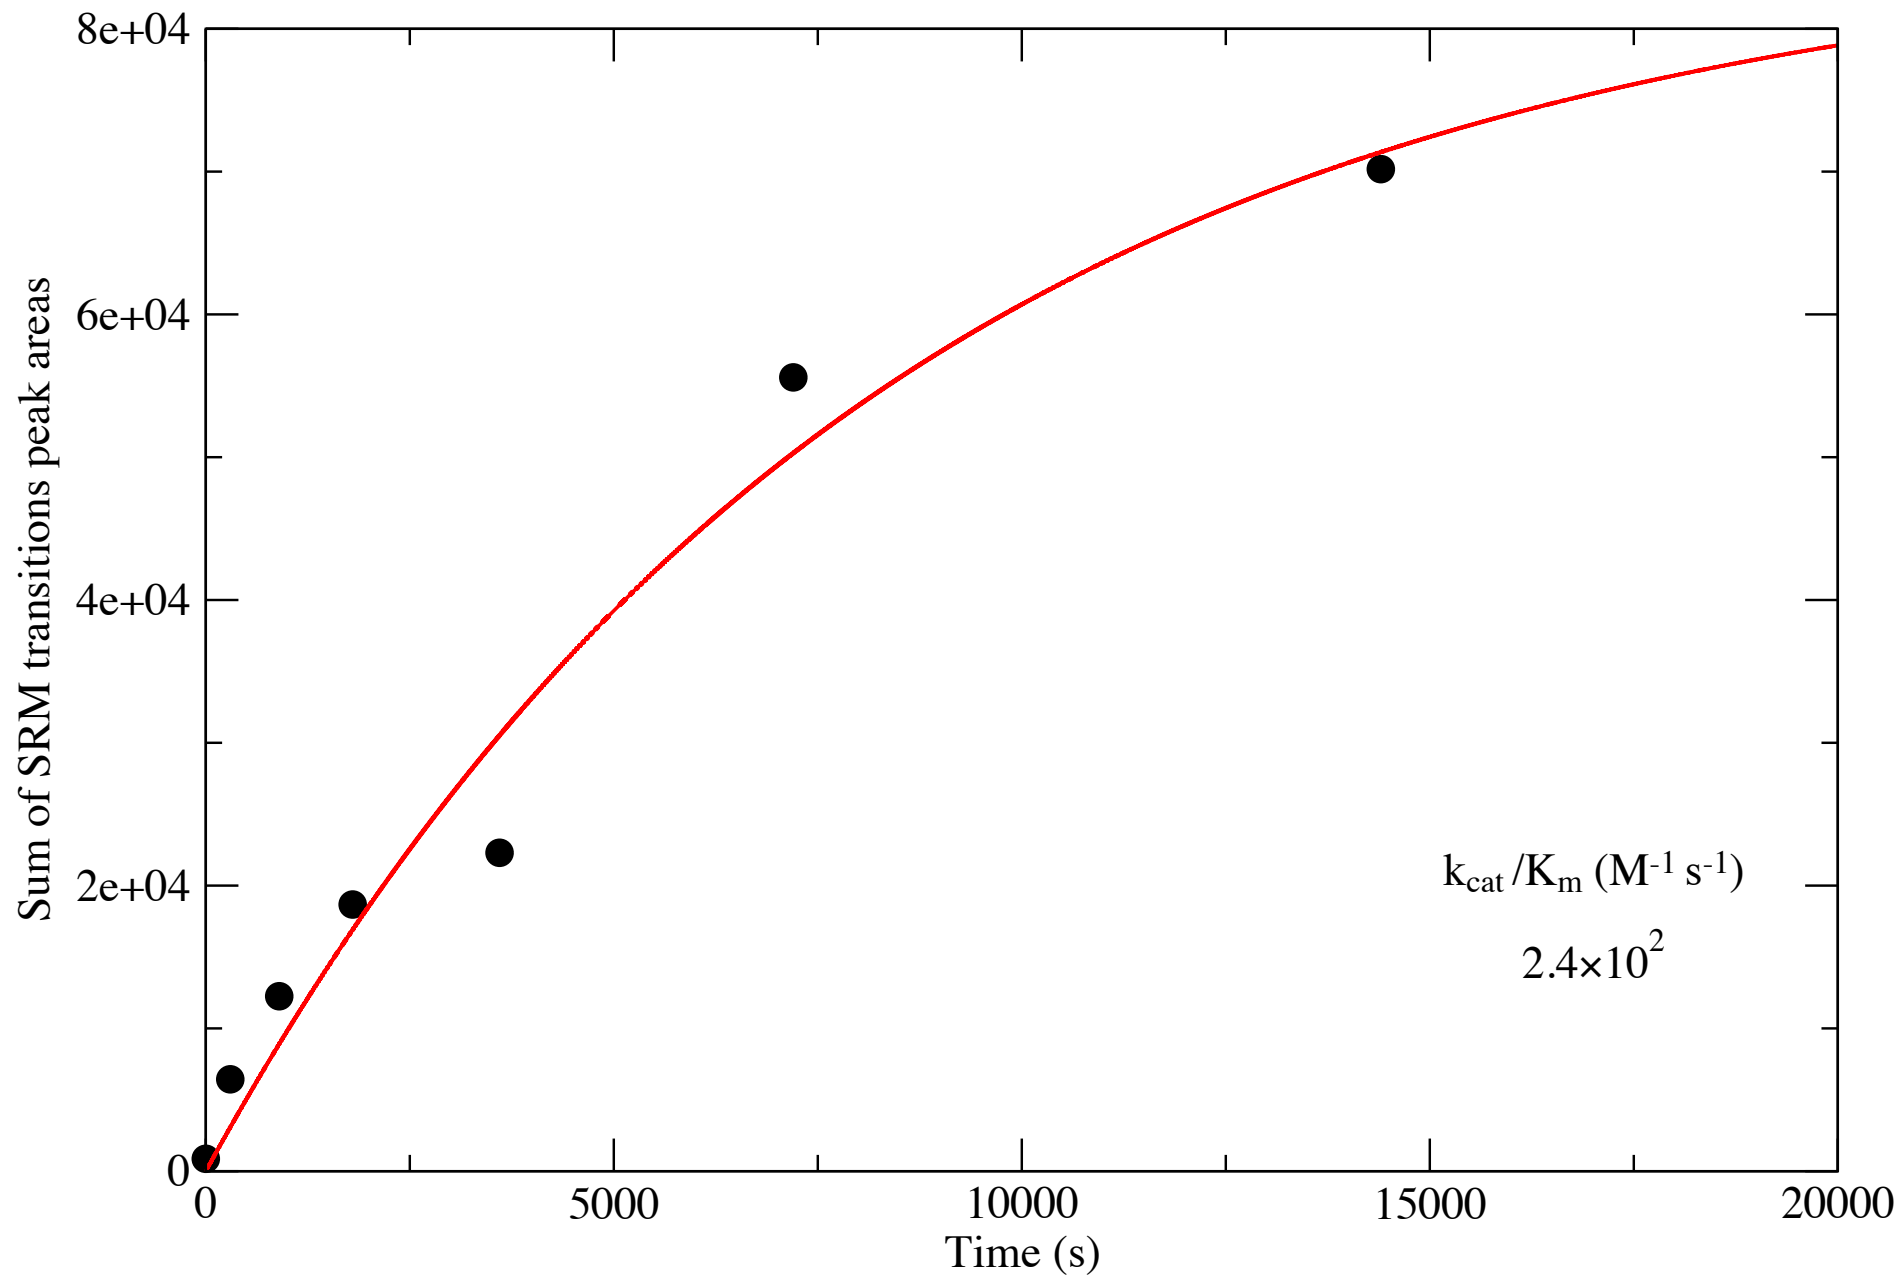

# PARP1\_HUMAN (GFSELRWDDQQKVK)

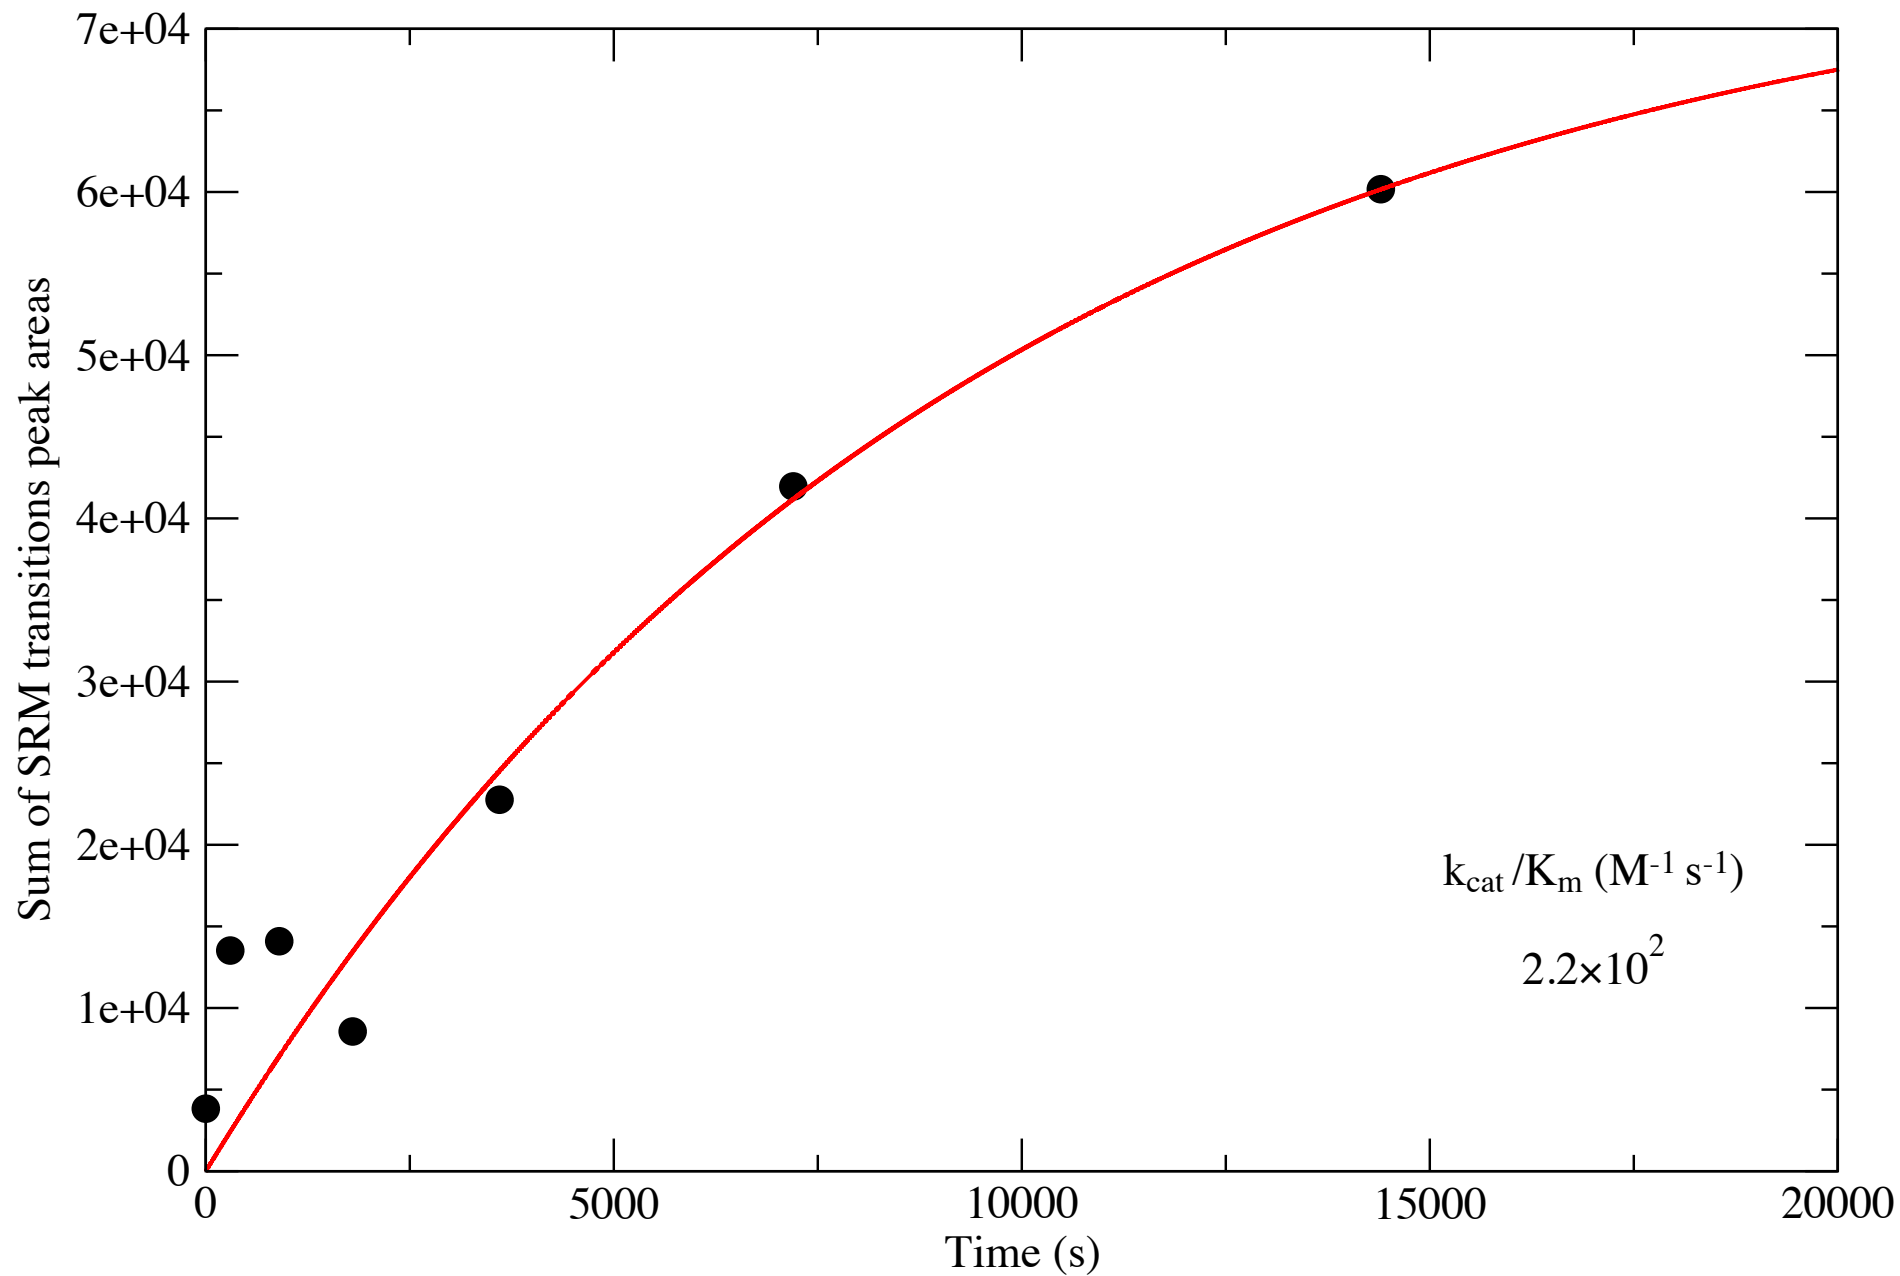

# PCM1\_HUMAN (GRGEPAMESSQIVSR)

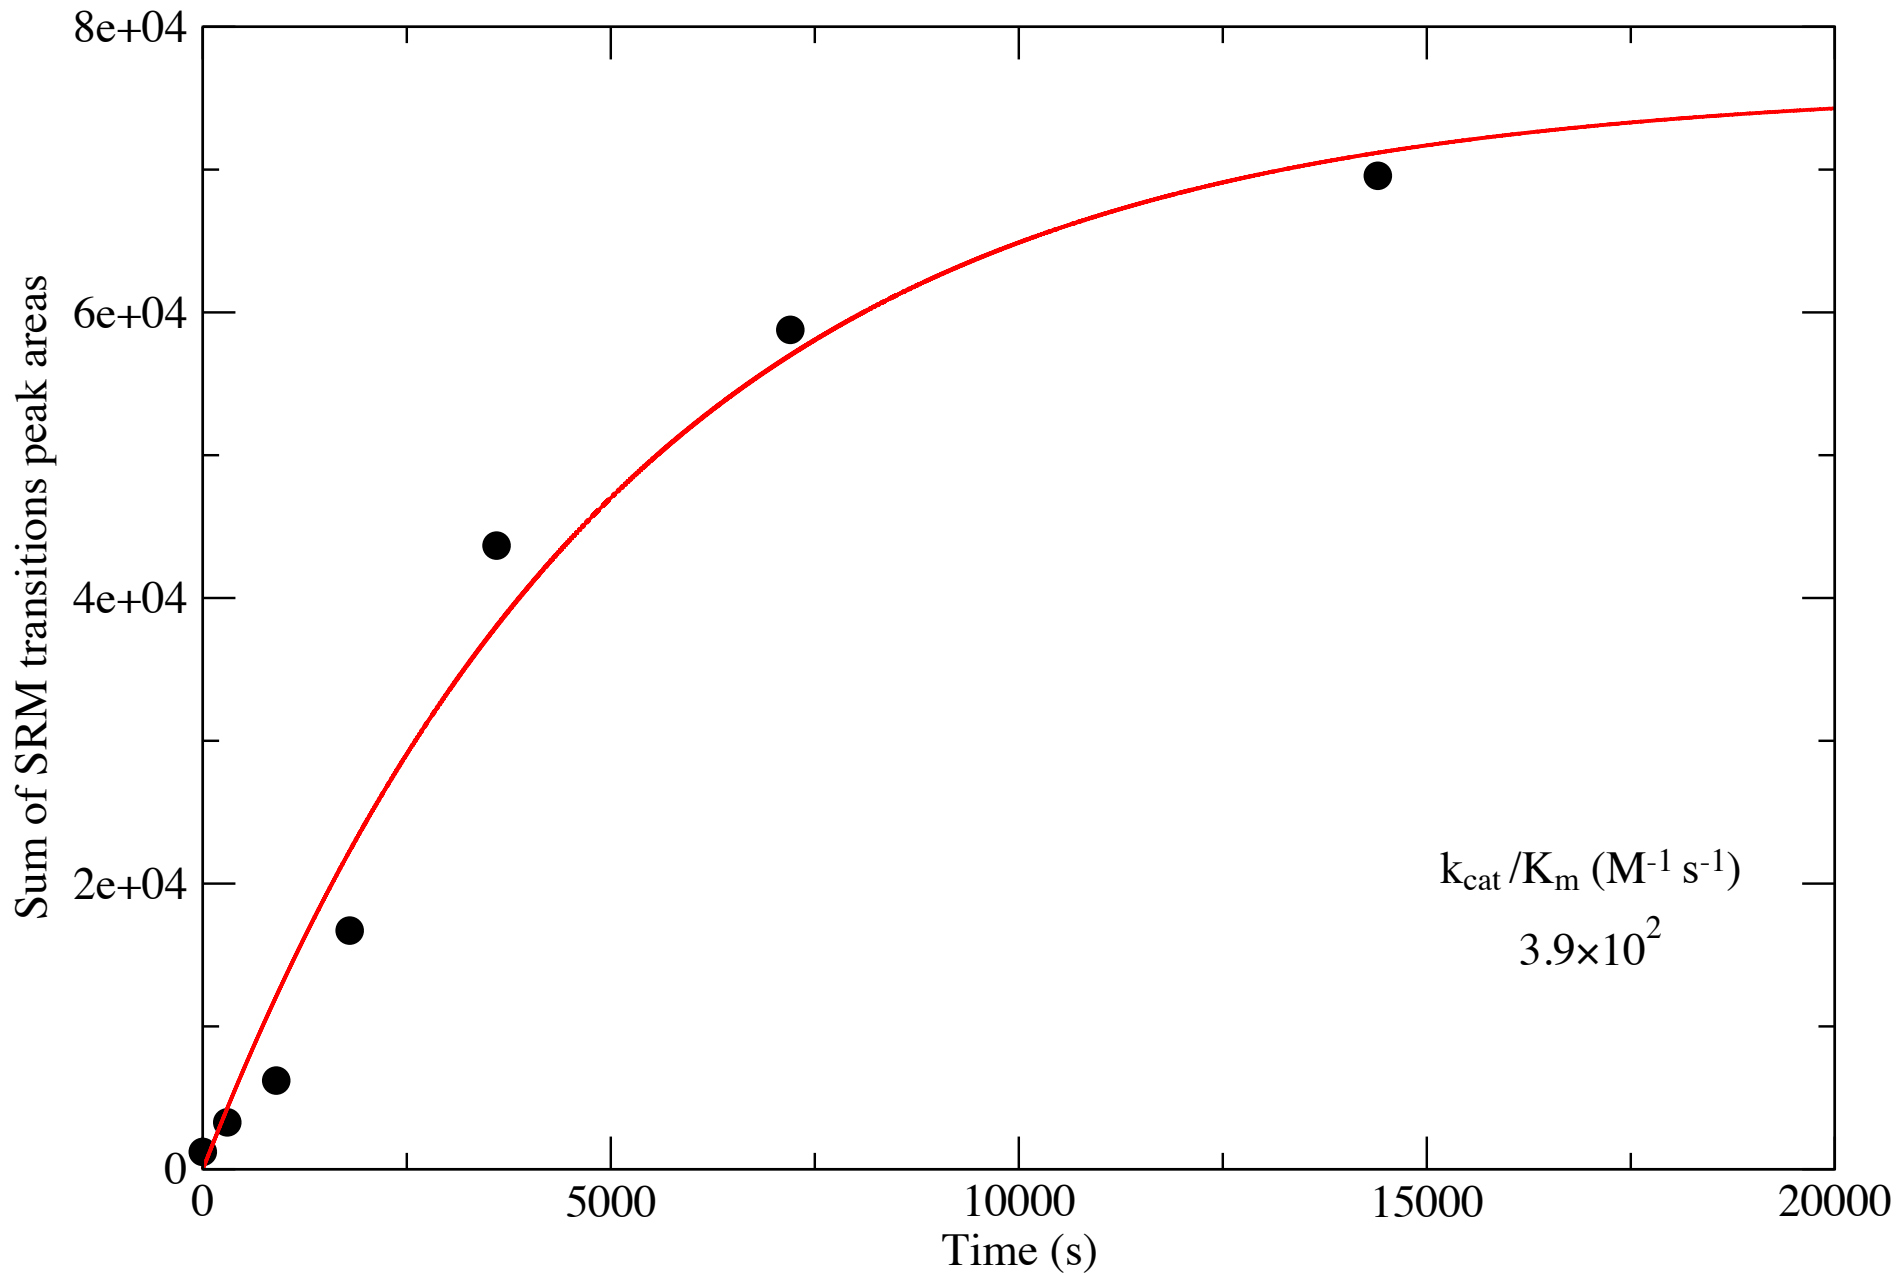

# PDIP3\_HUMAN (AYTAPALPSSIR)

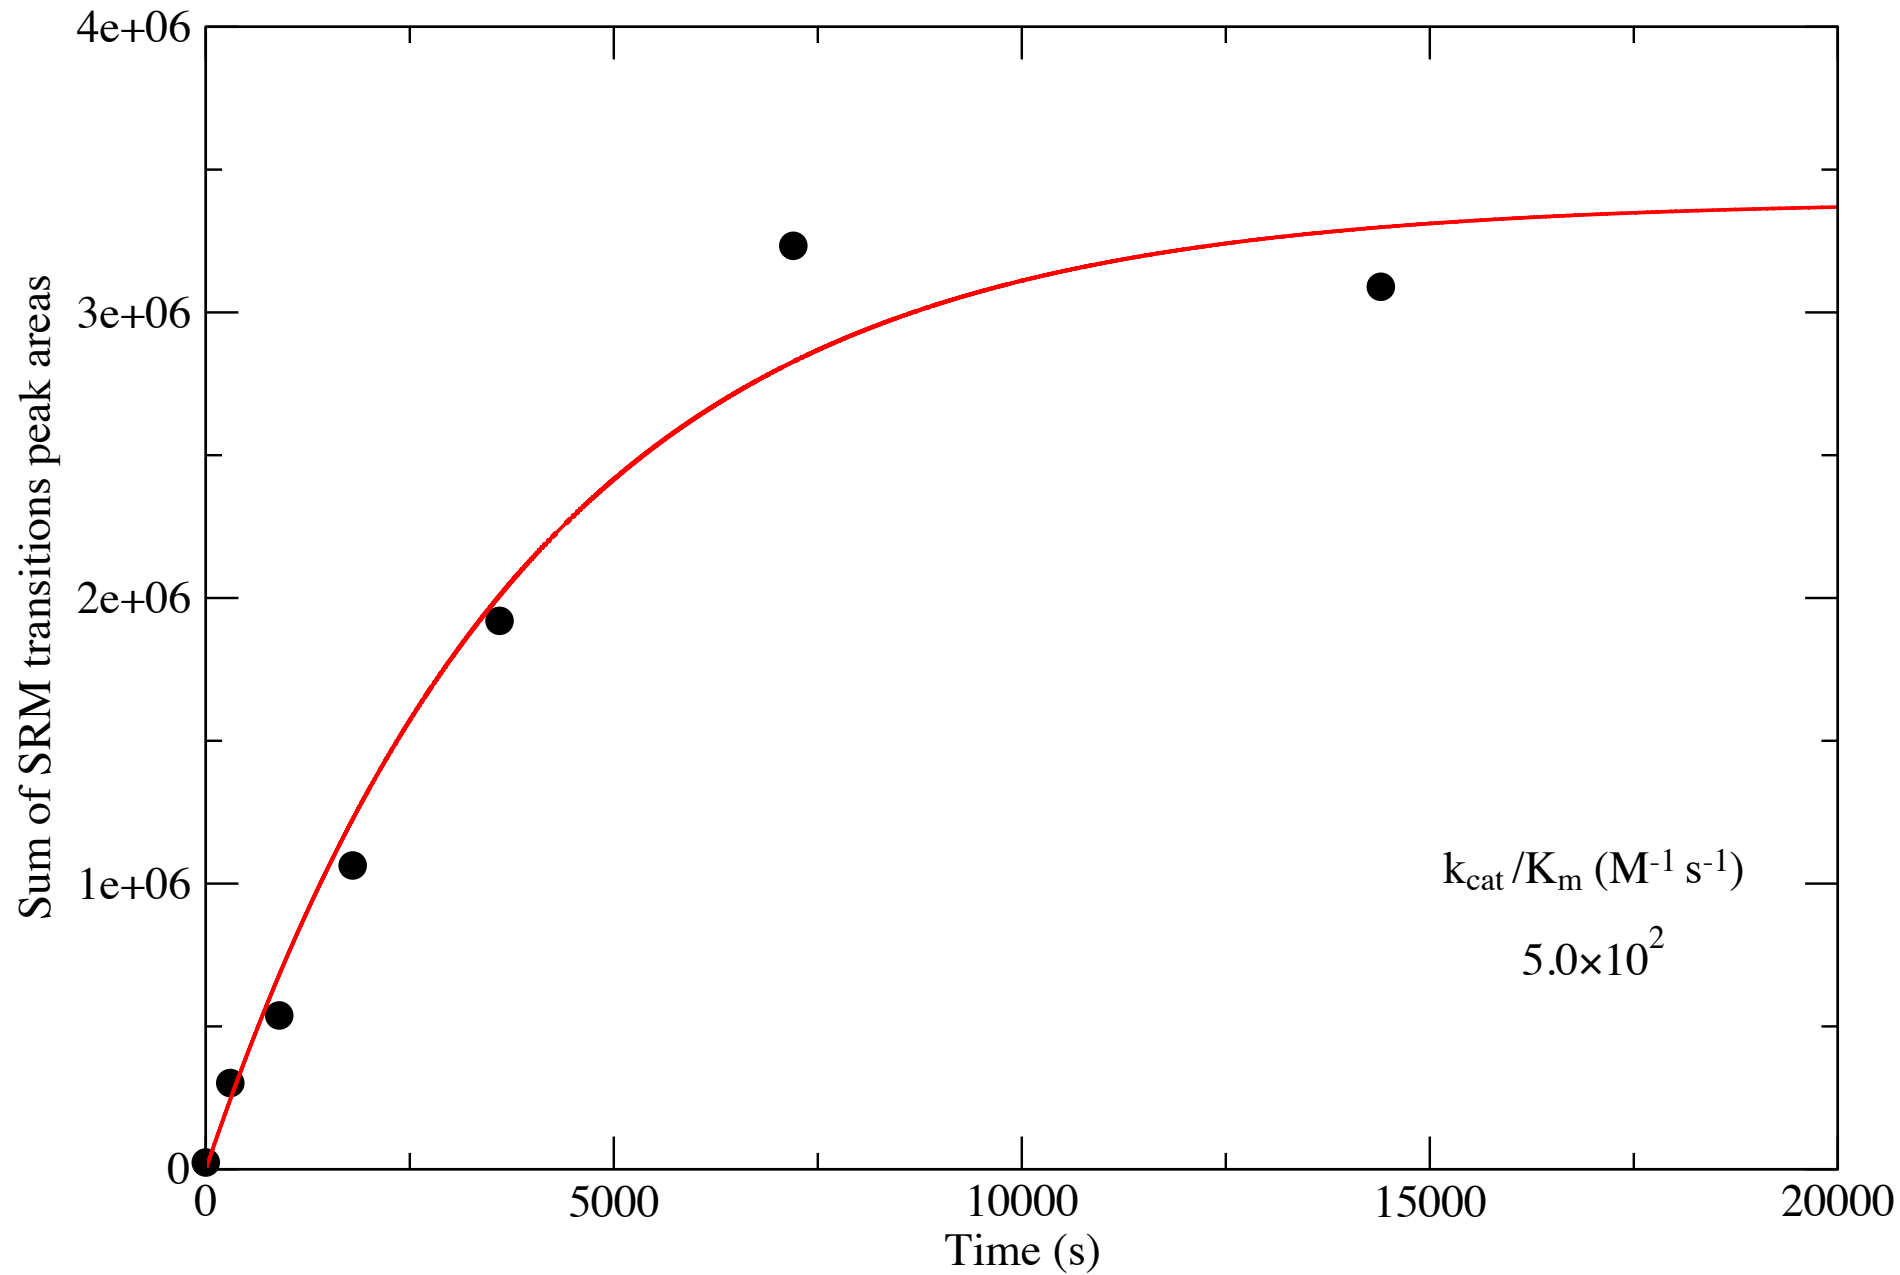

# PDIP3\_HUMAN (GIASVPTK)

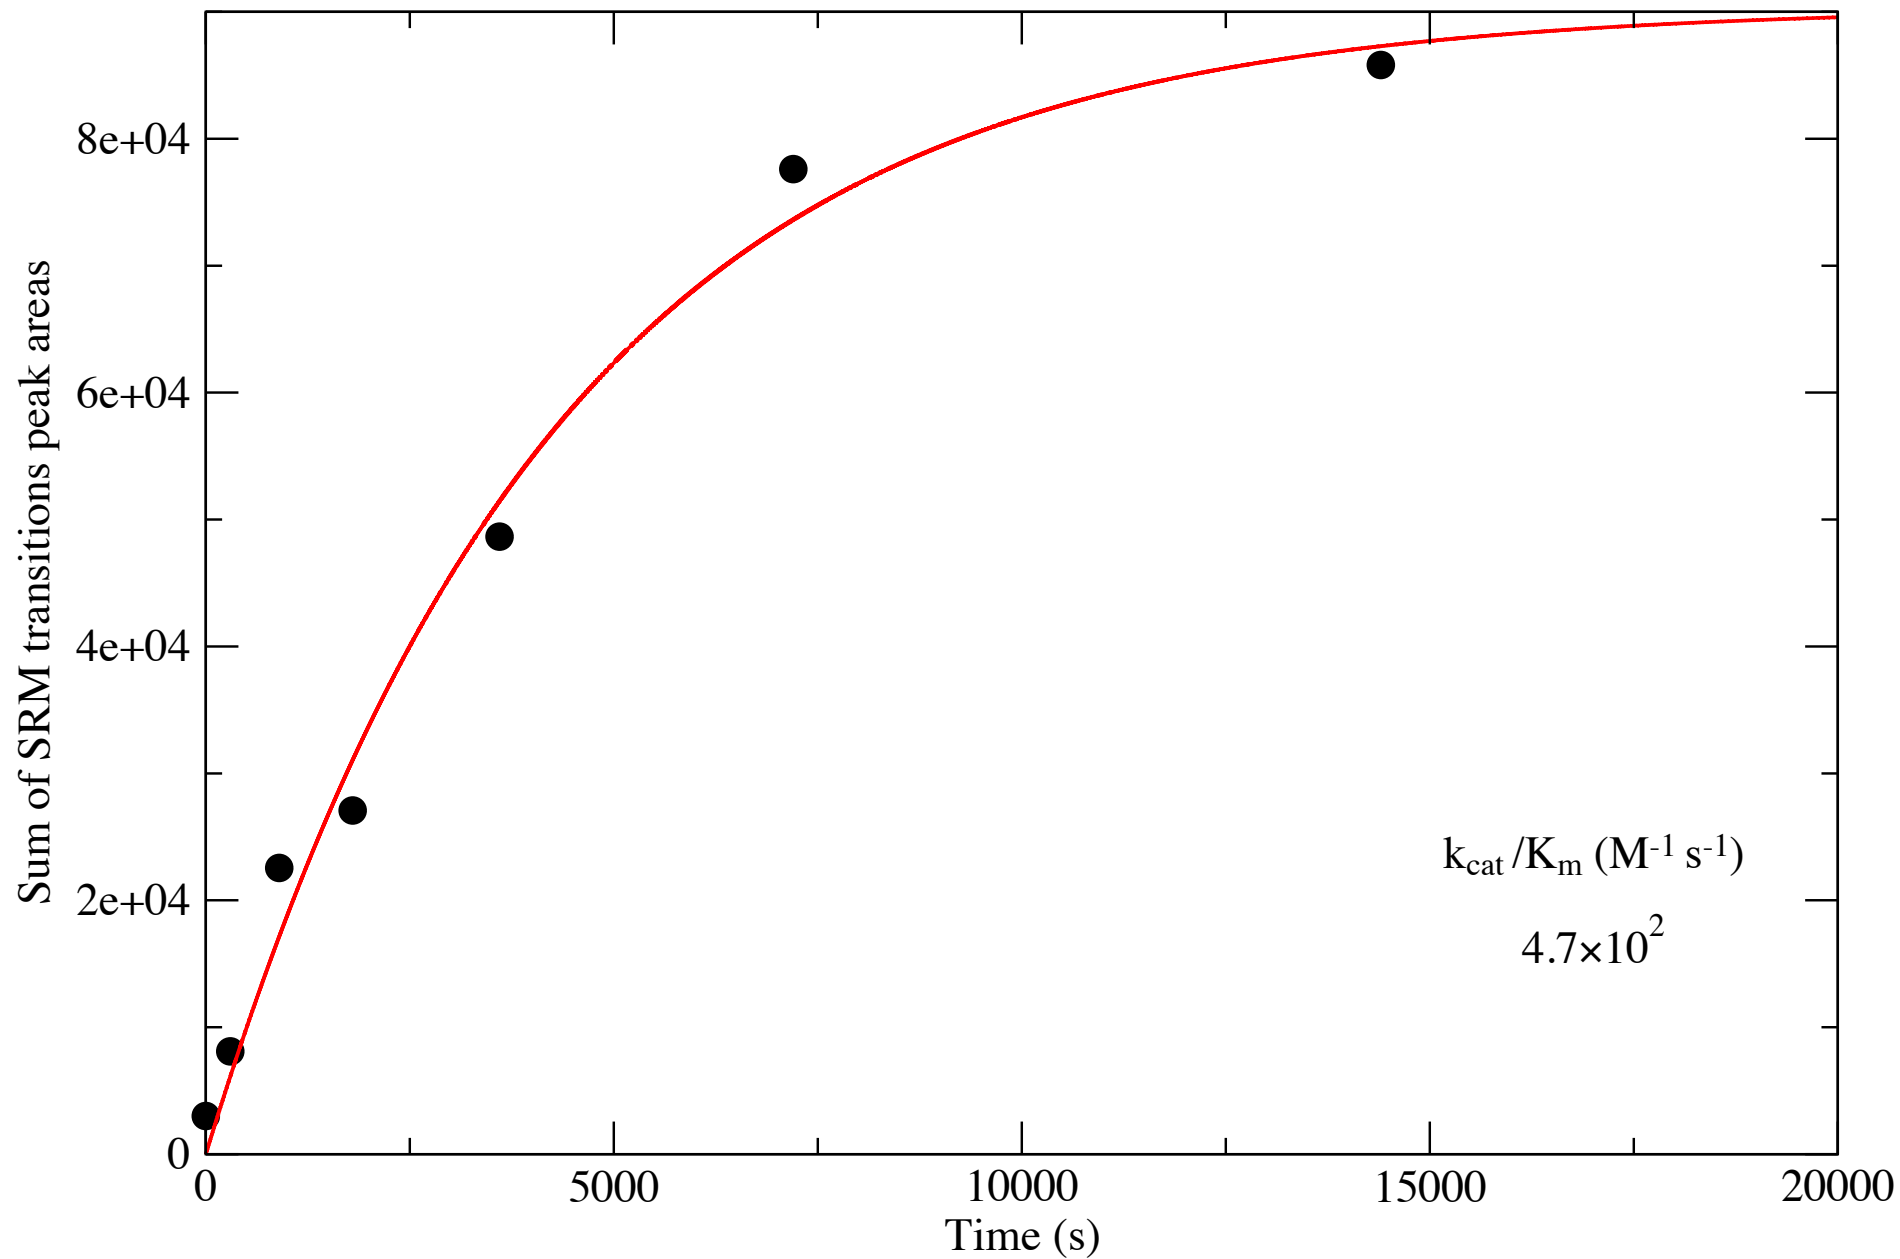

# PHF8\_HUMAN (SLGACFK)

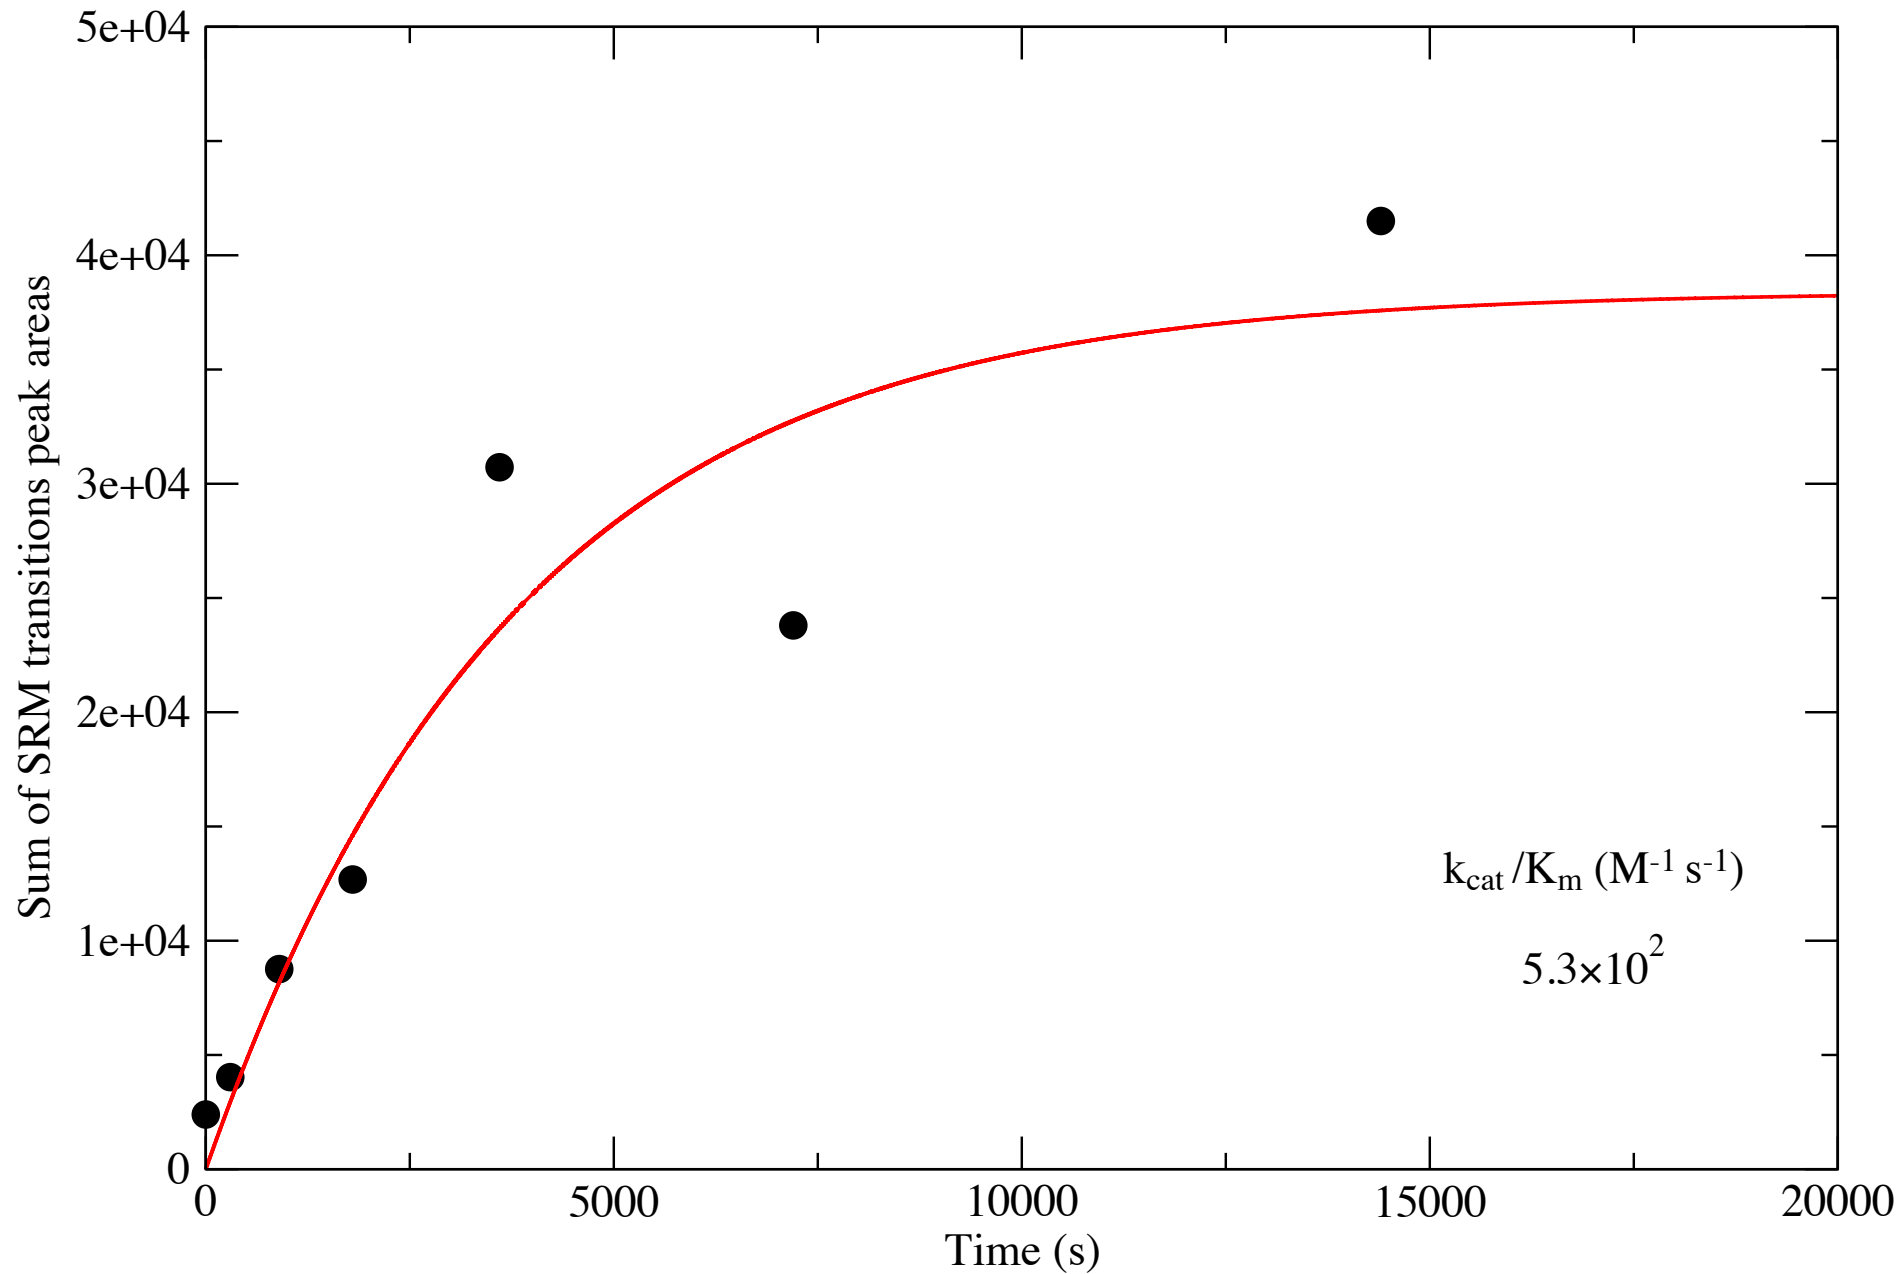



# PHLP1\_HUMAN (AASAPTGVPGQPR)

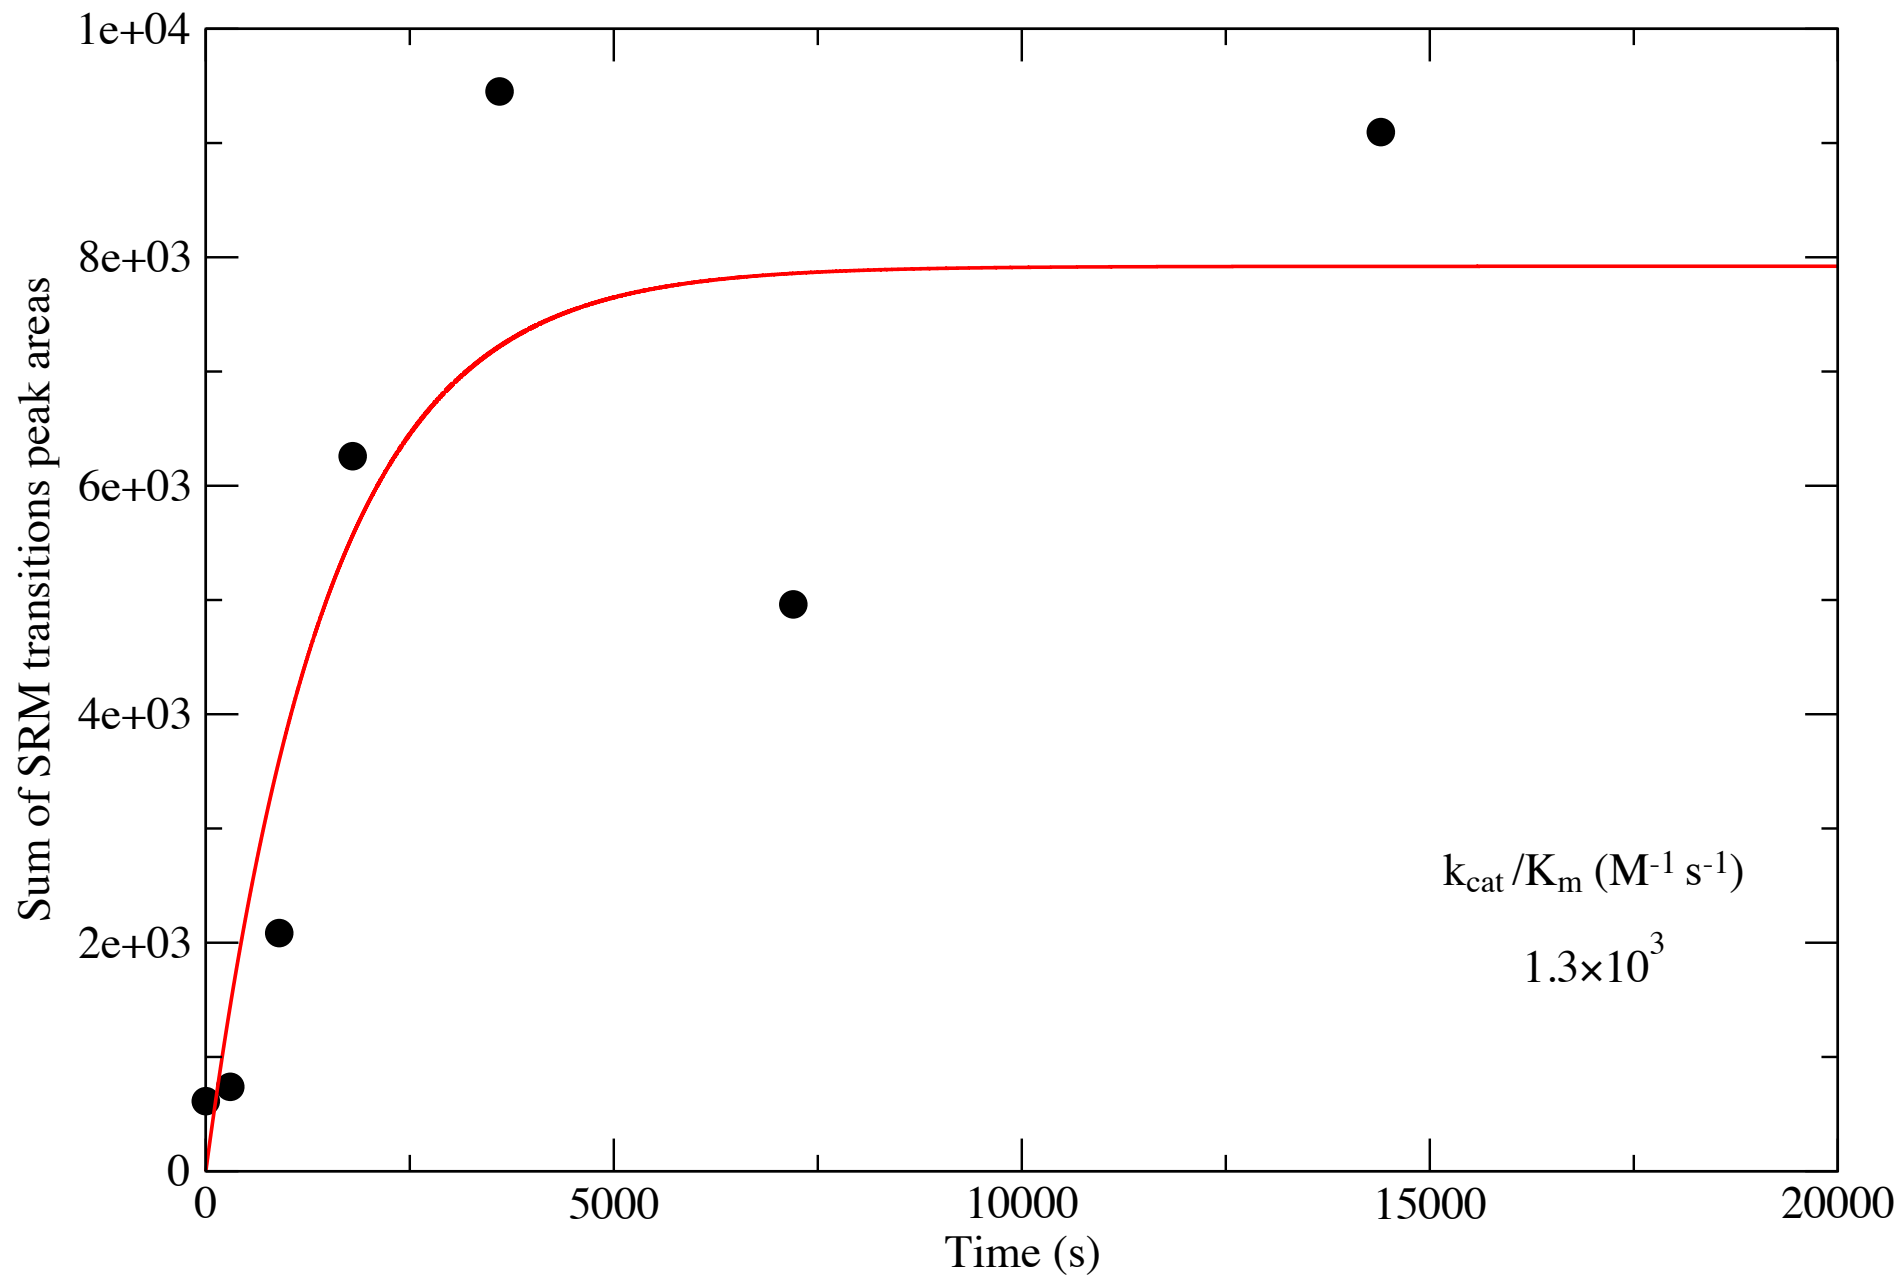

# PI42B\_HUMAN (GVGGNLLCSYGTPPDSPGNLLSFPR)

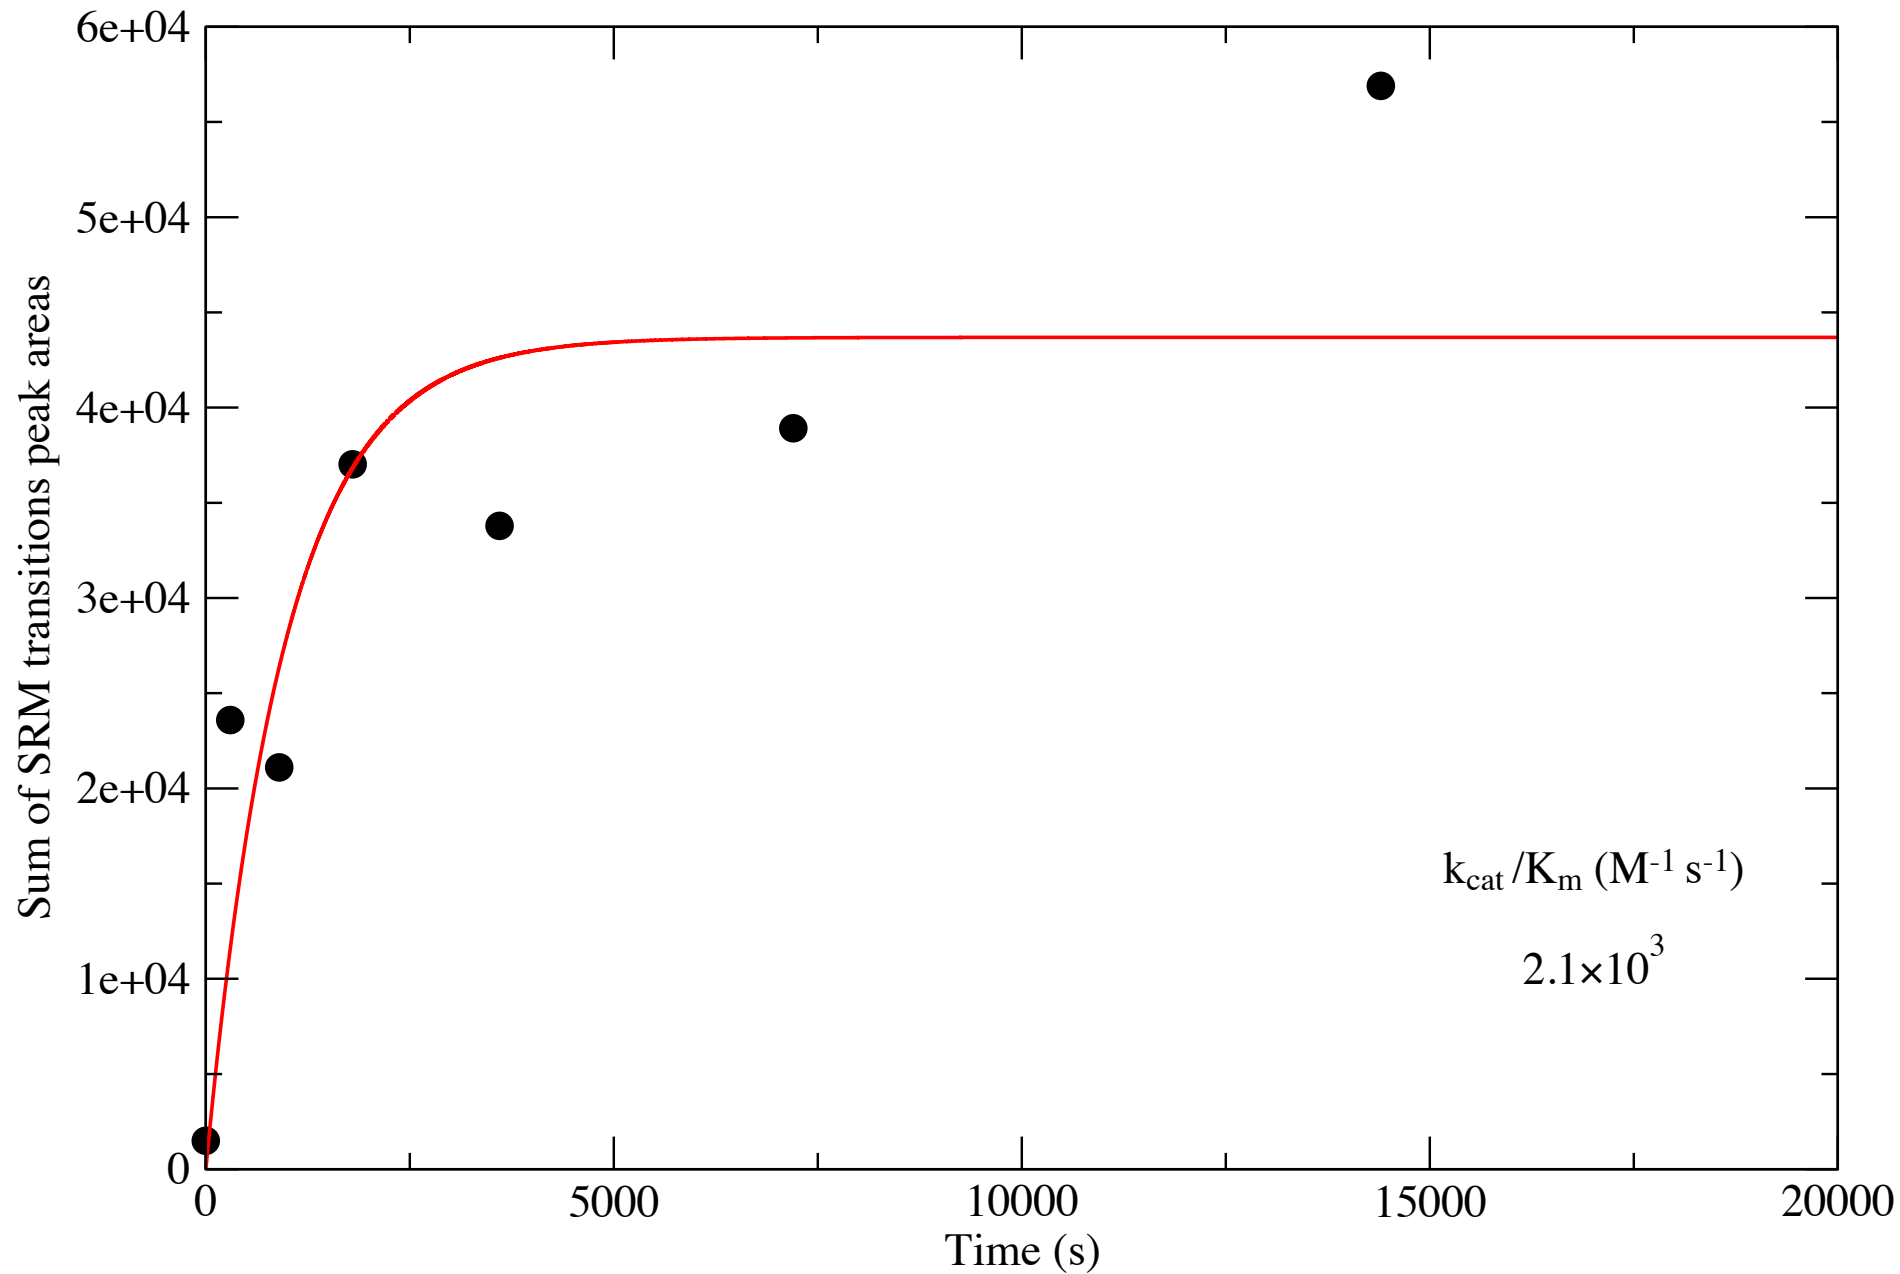

# PICAL\_HUMAN (AVDDAIPSLNPFLTK)

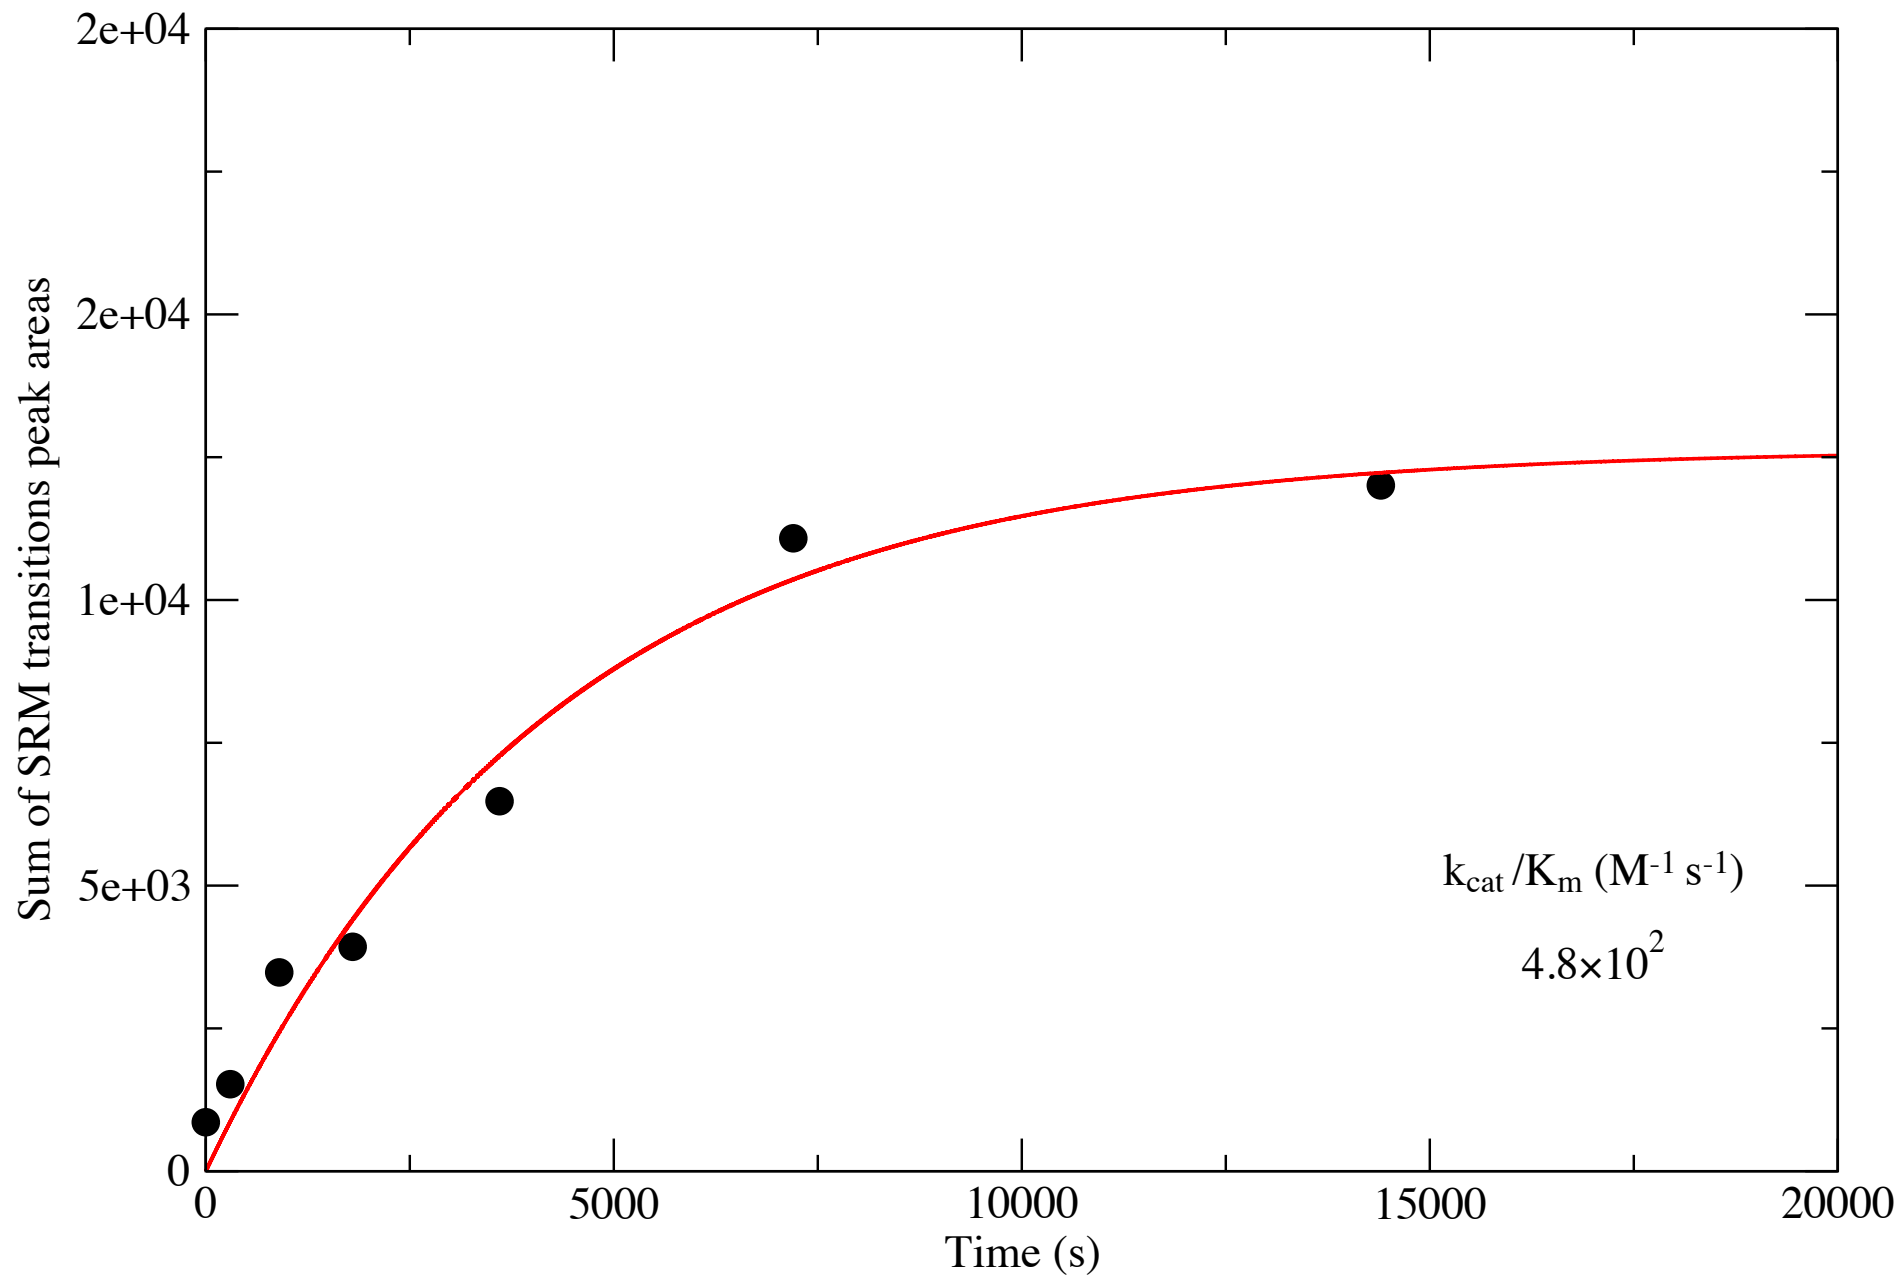

# PJA2\_HUMAN (SSLPSEPIFEK)

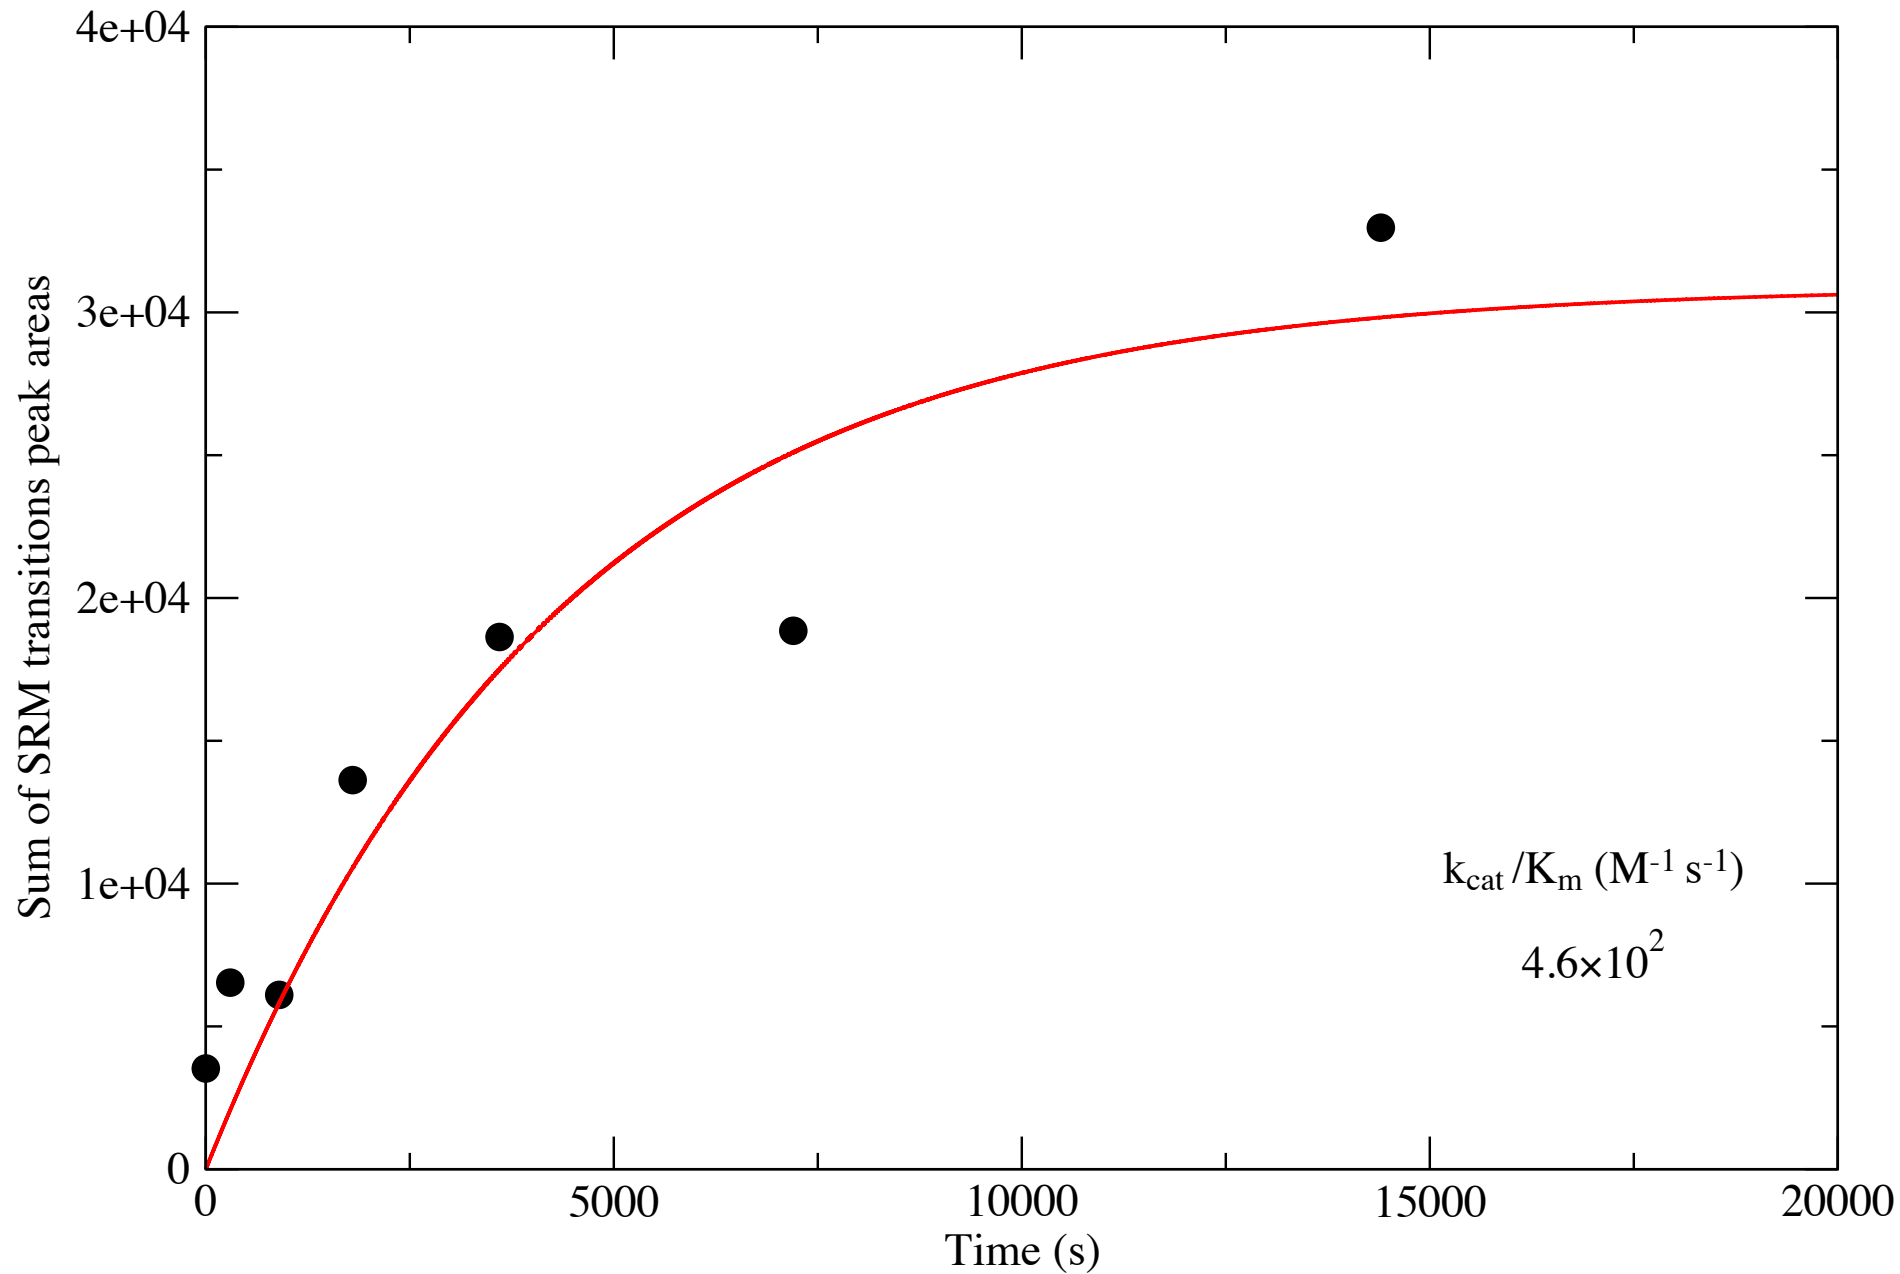

# PK3C3\_HUMAN (SSQIITSPLPSVSSPPASK)

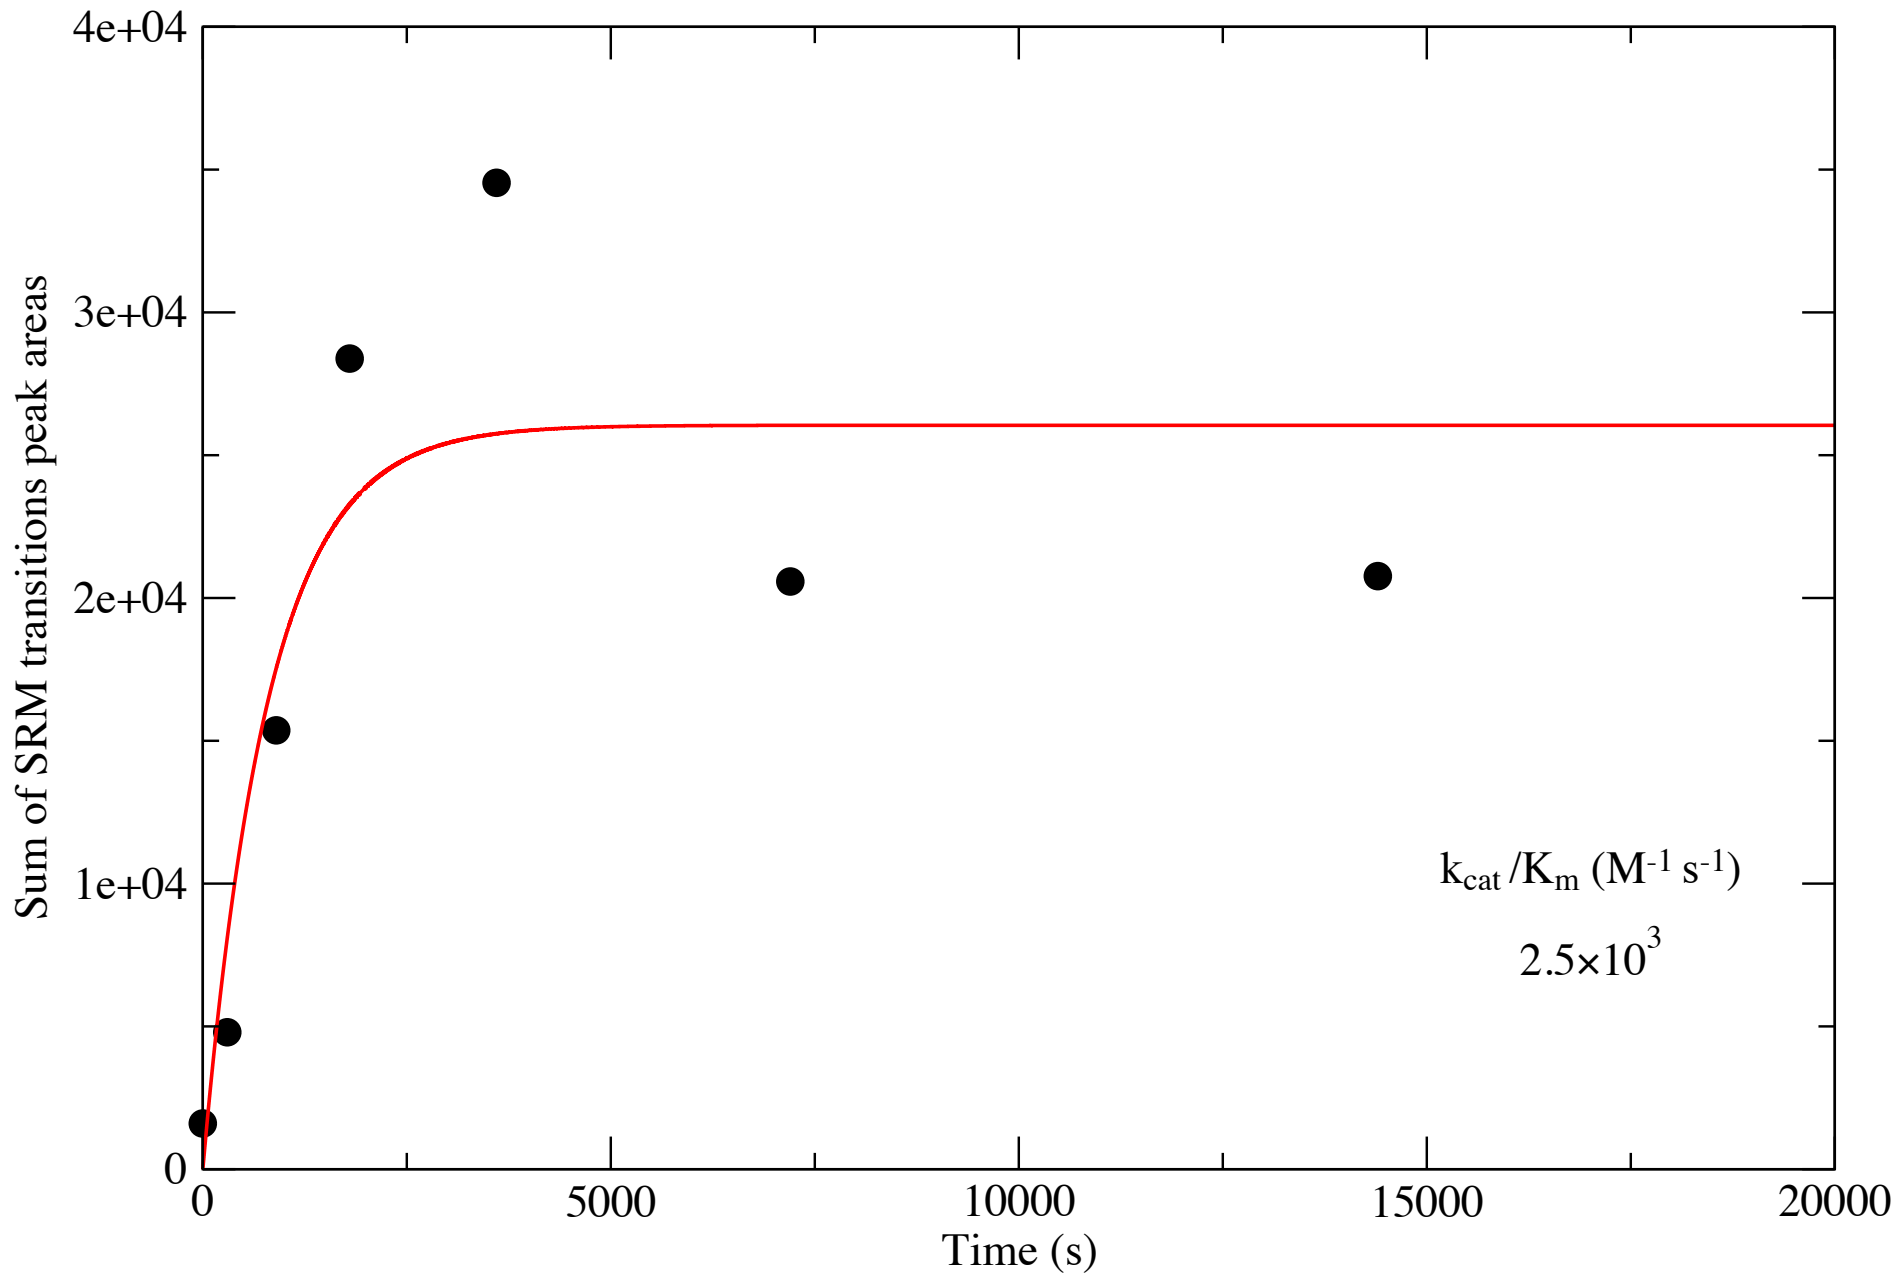

# PLIN3\_HUMAN (GSTQVTVEEPVQQPSVVDR)

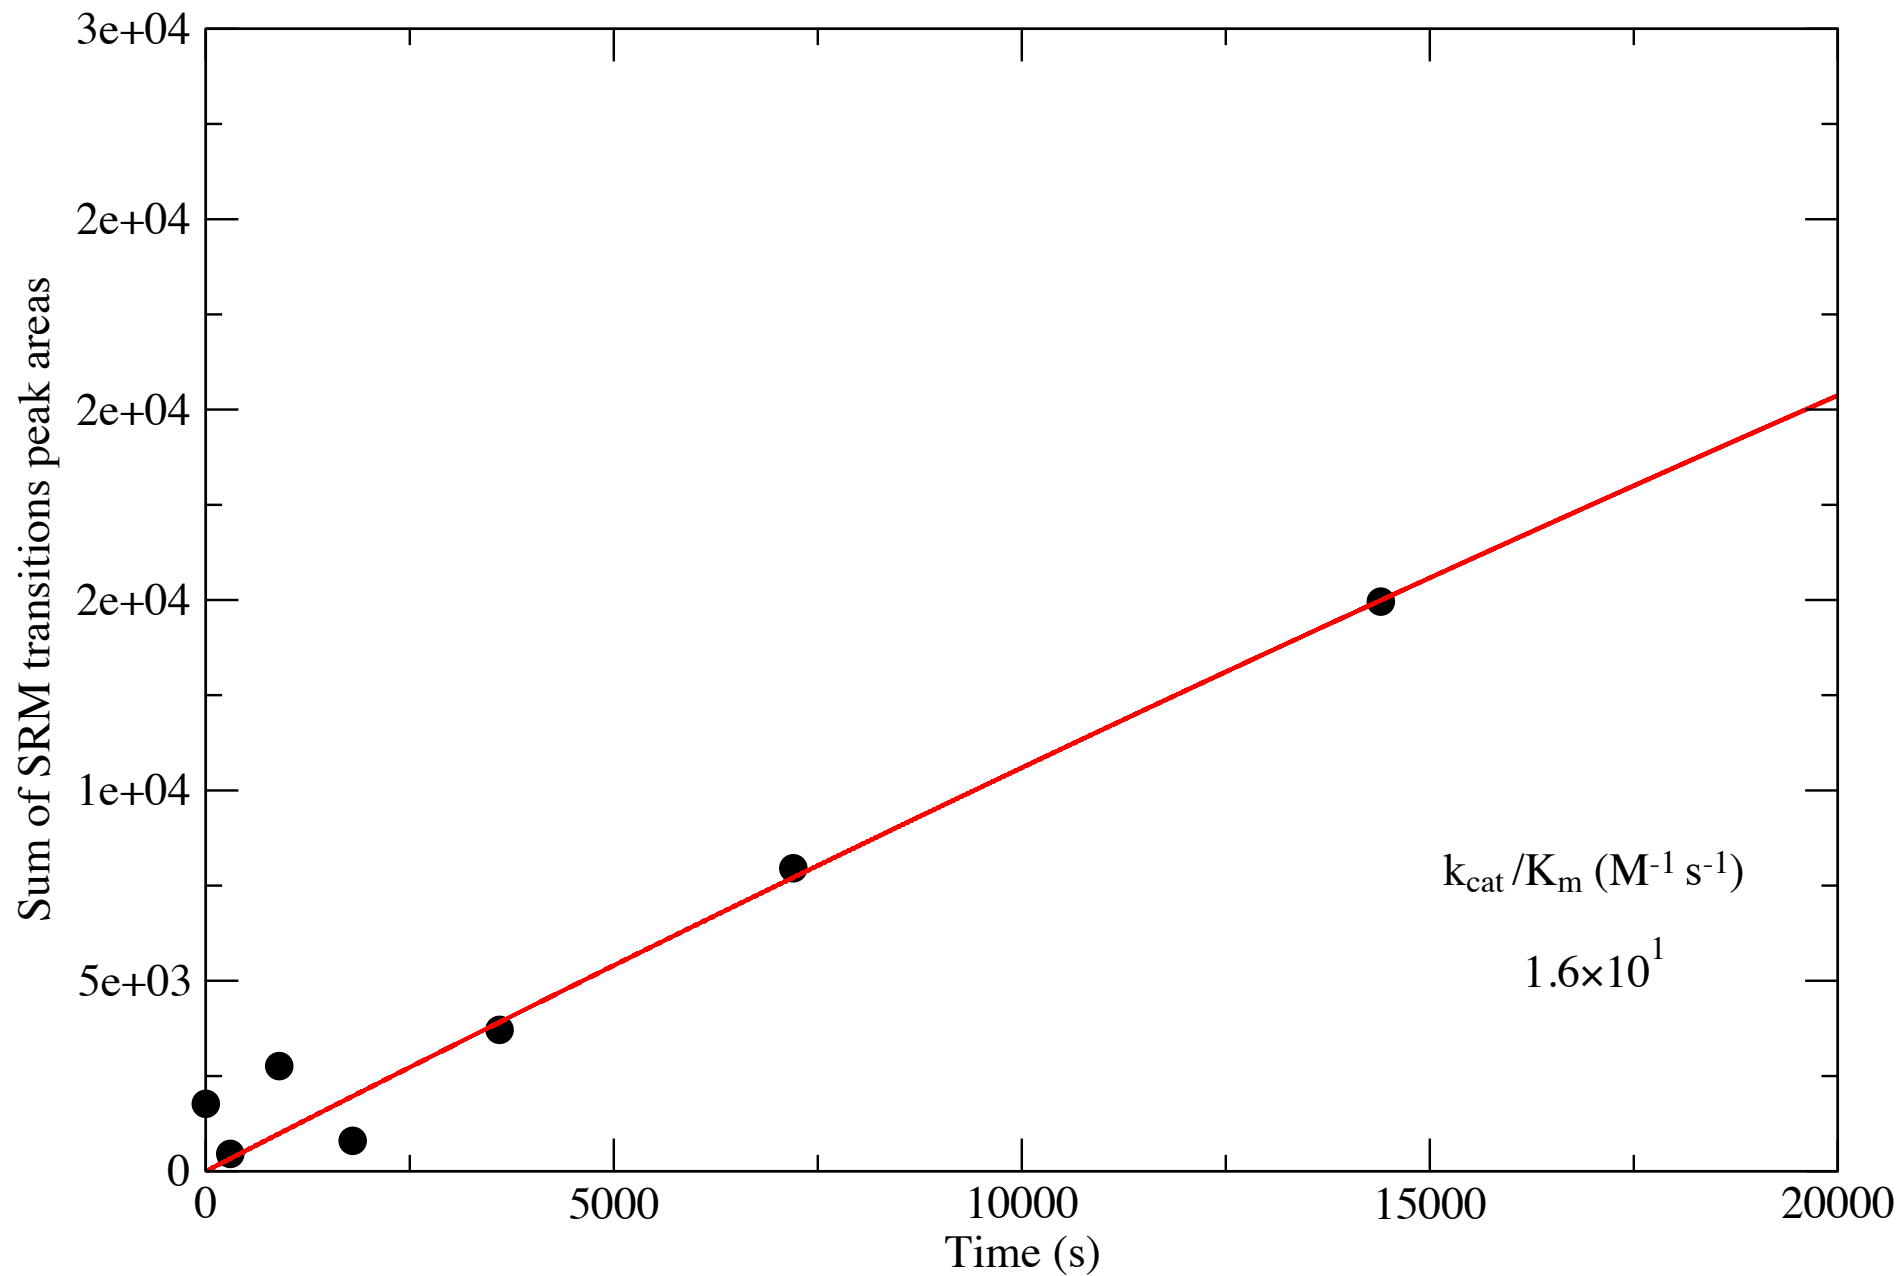

# PLPL6\_HUMAN (GFQDVLAPGEGSAGR)

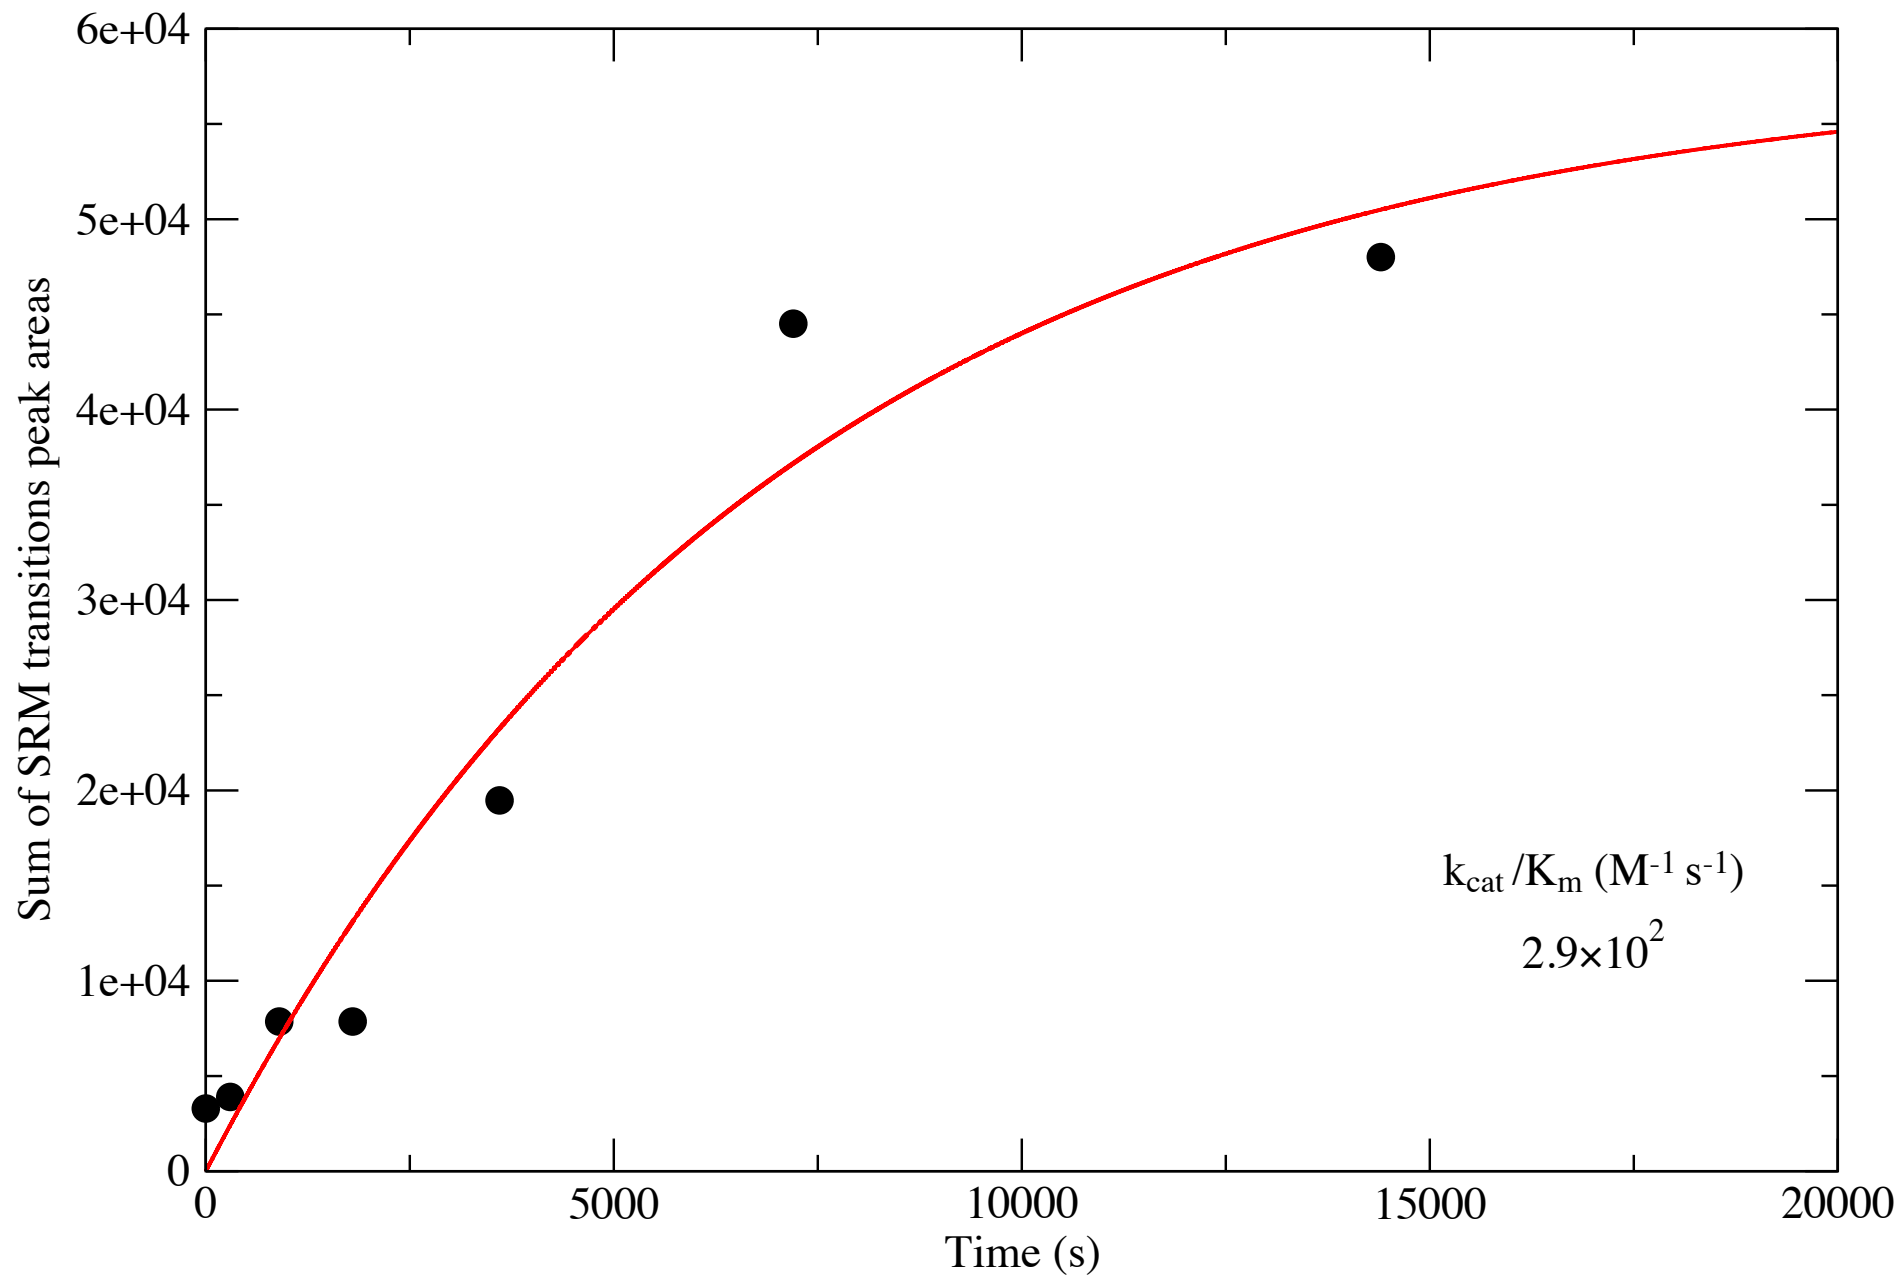

# PML\_HUMAN (GFDEFKVR)

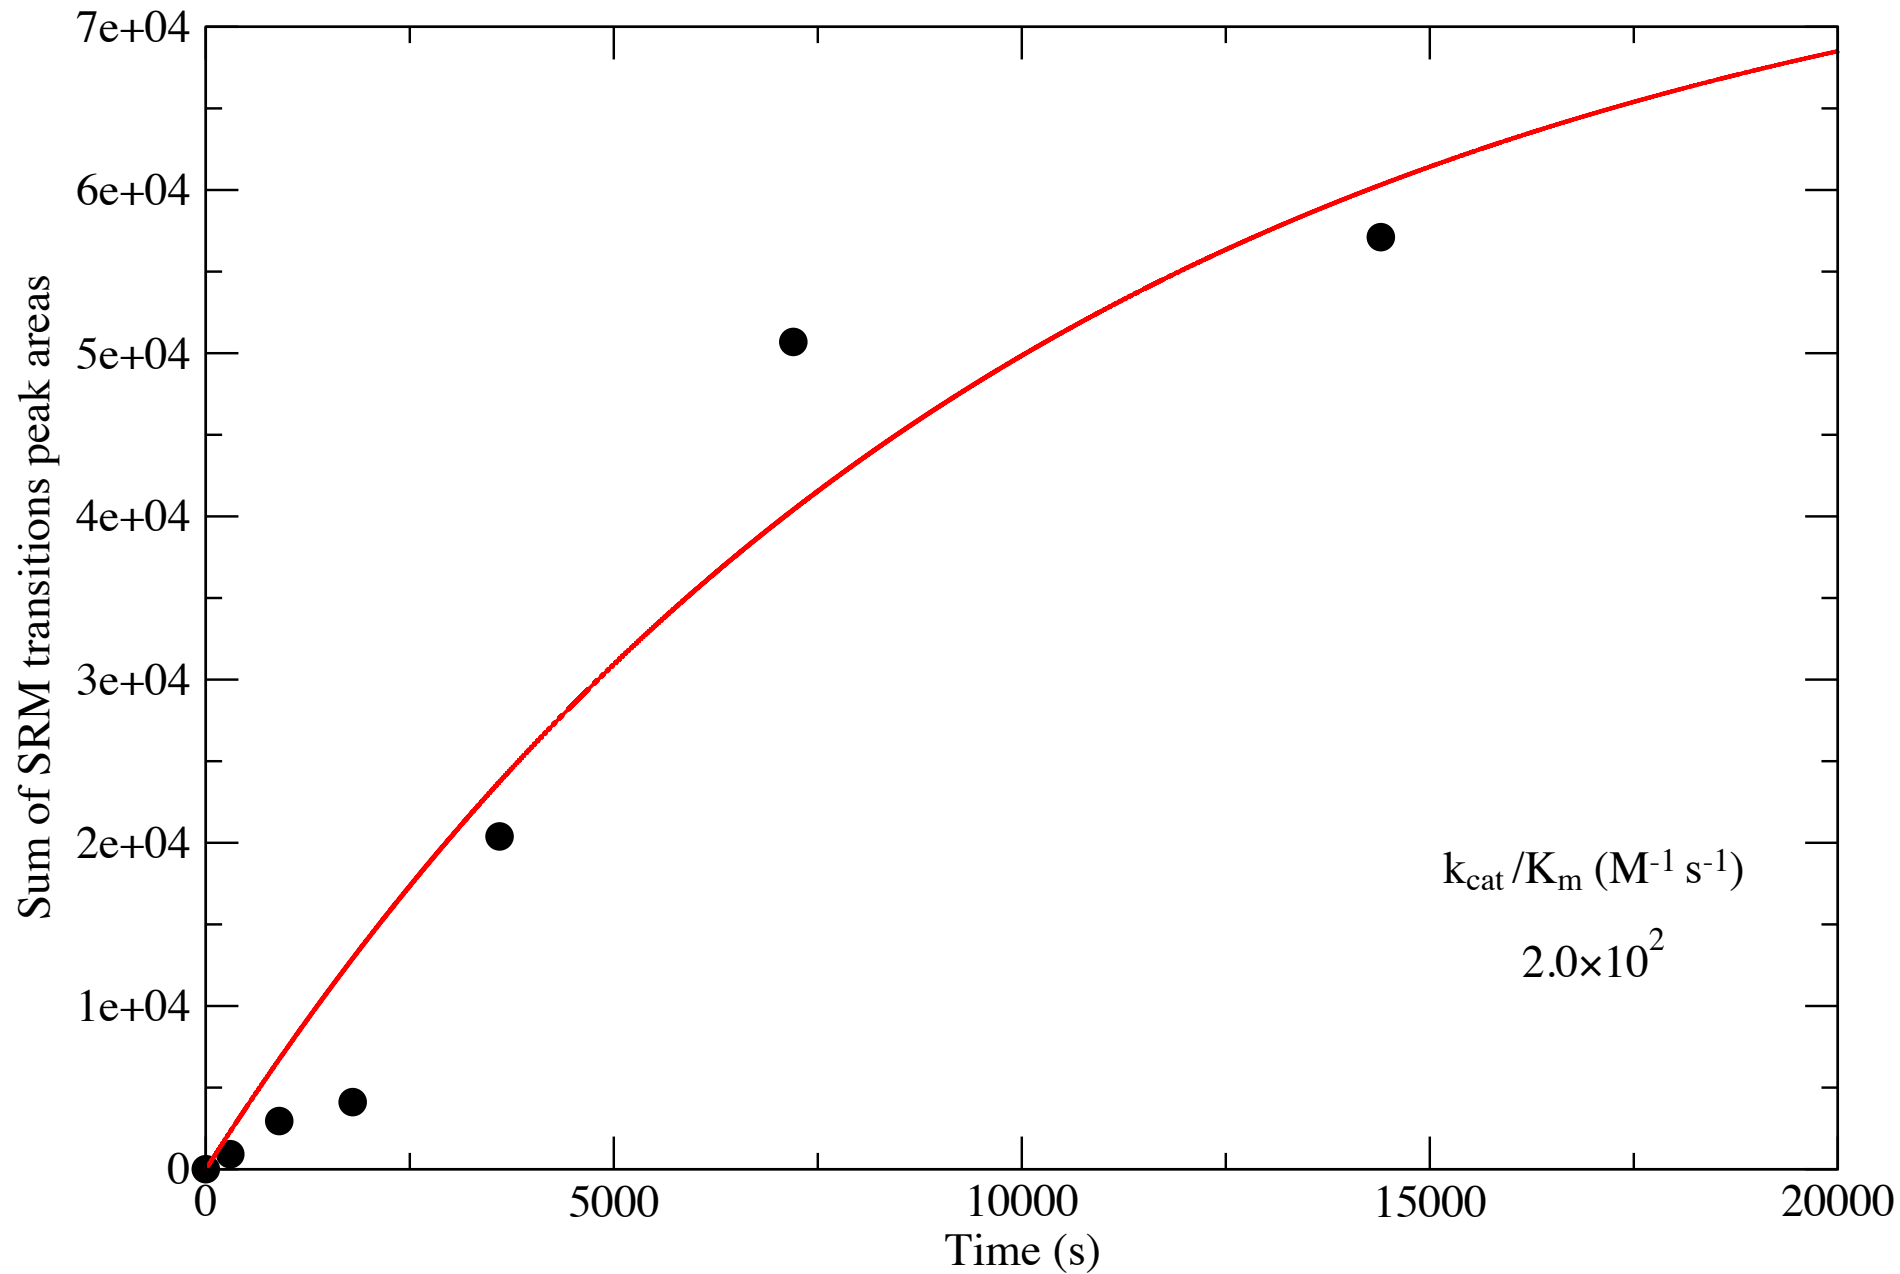



# PPR3D\_HUMAN (GGVALEPR)

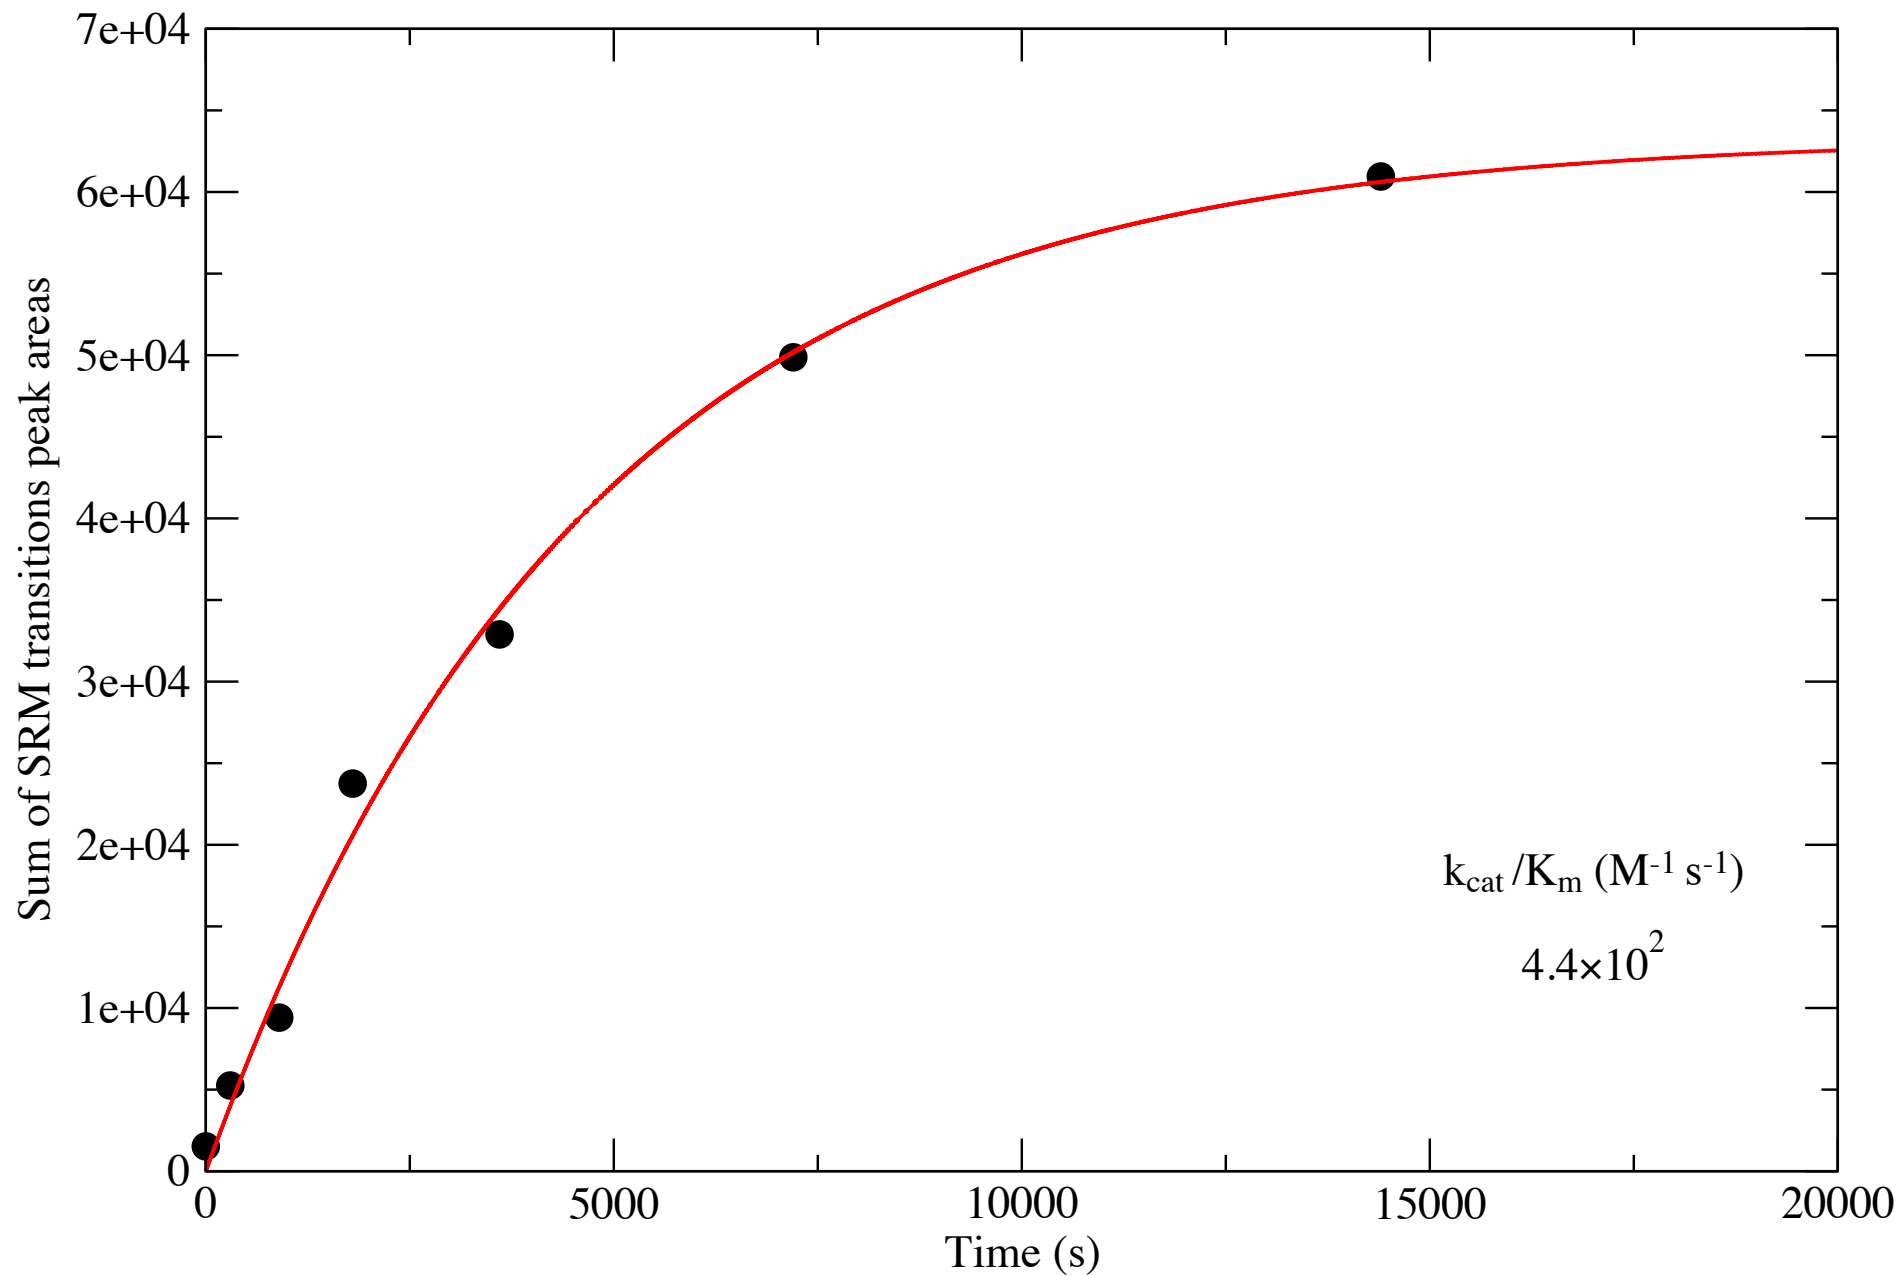

# PRC2B\_HUMAN (GGLSGASLGEK)

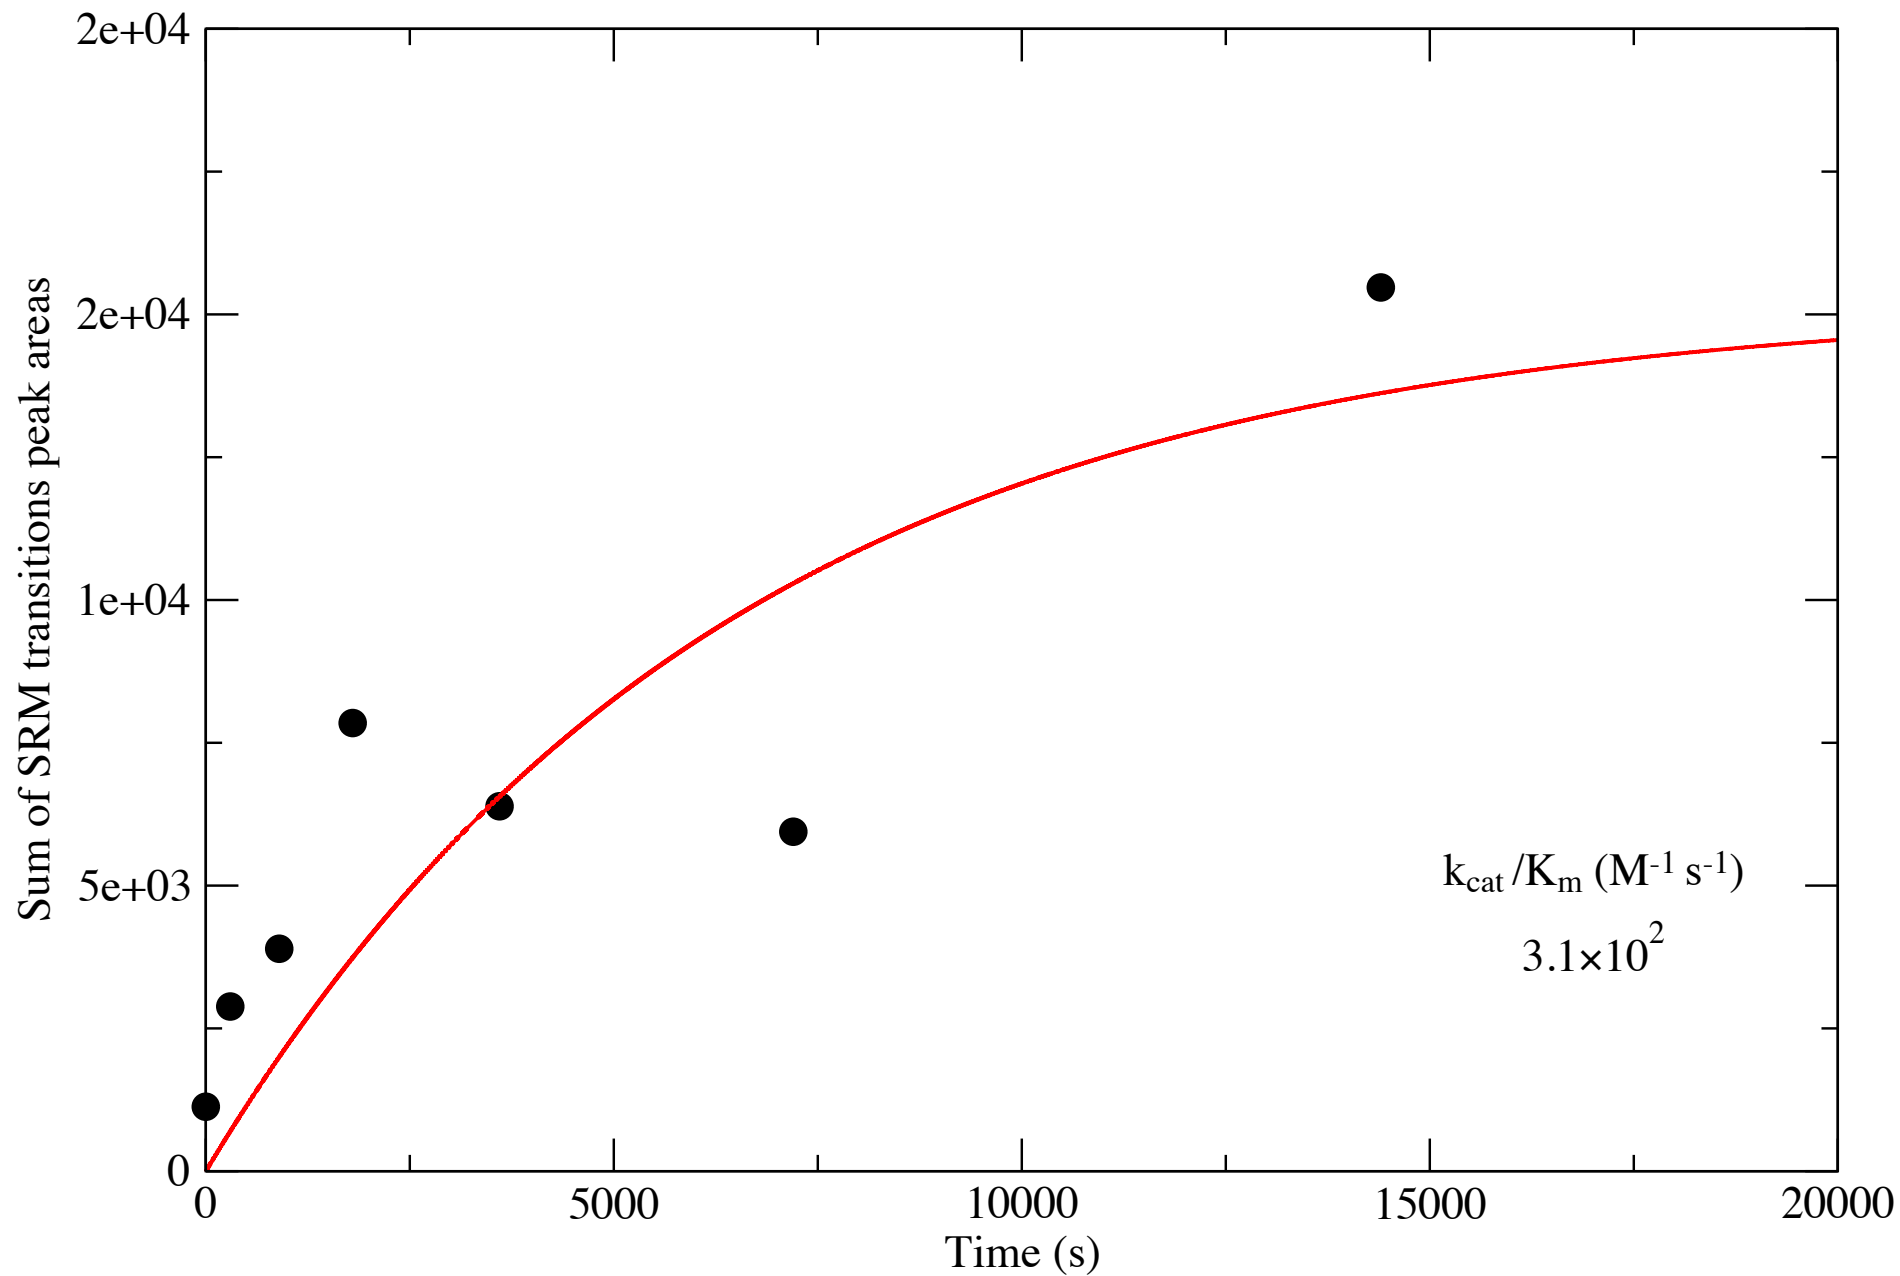

# PRC2B\_HUMAN (SVLPVPPIEFGVSPK)

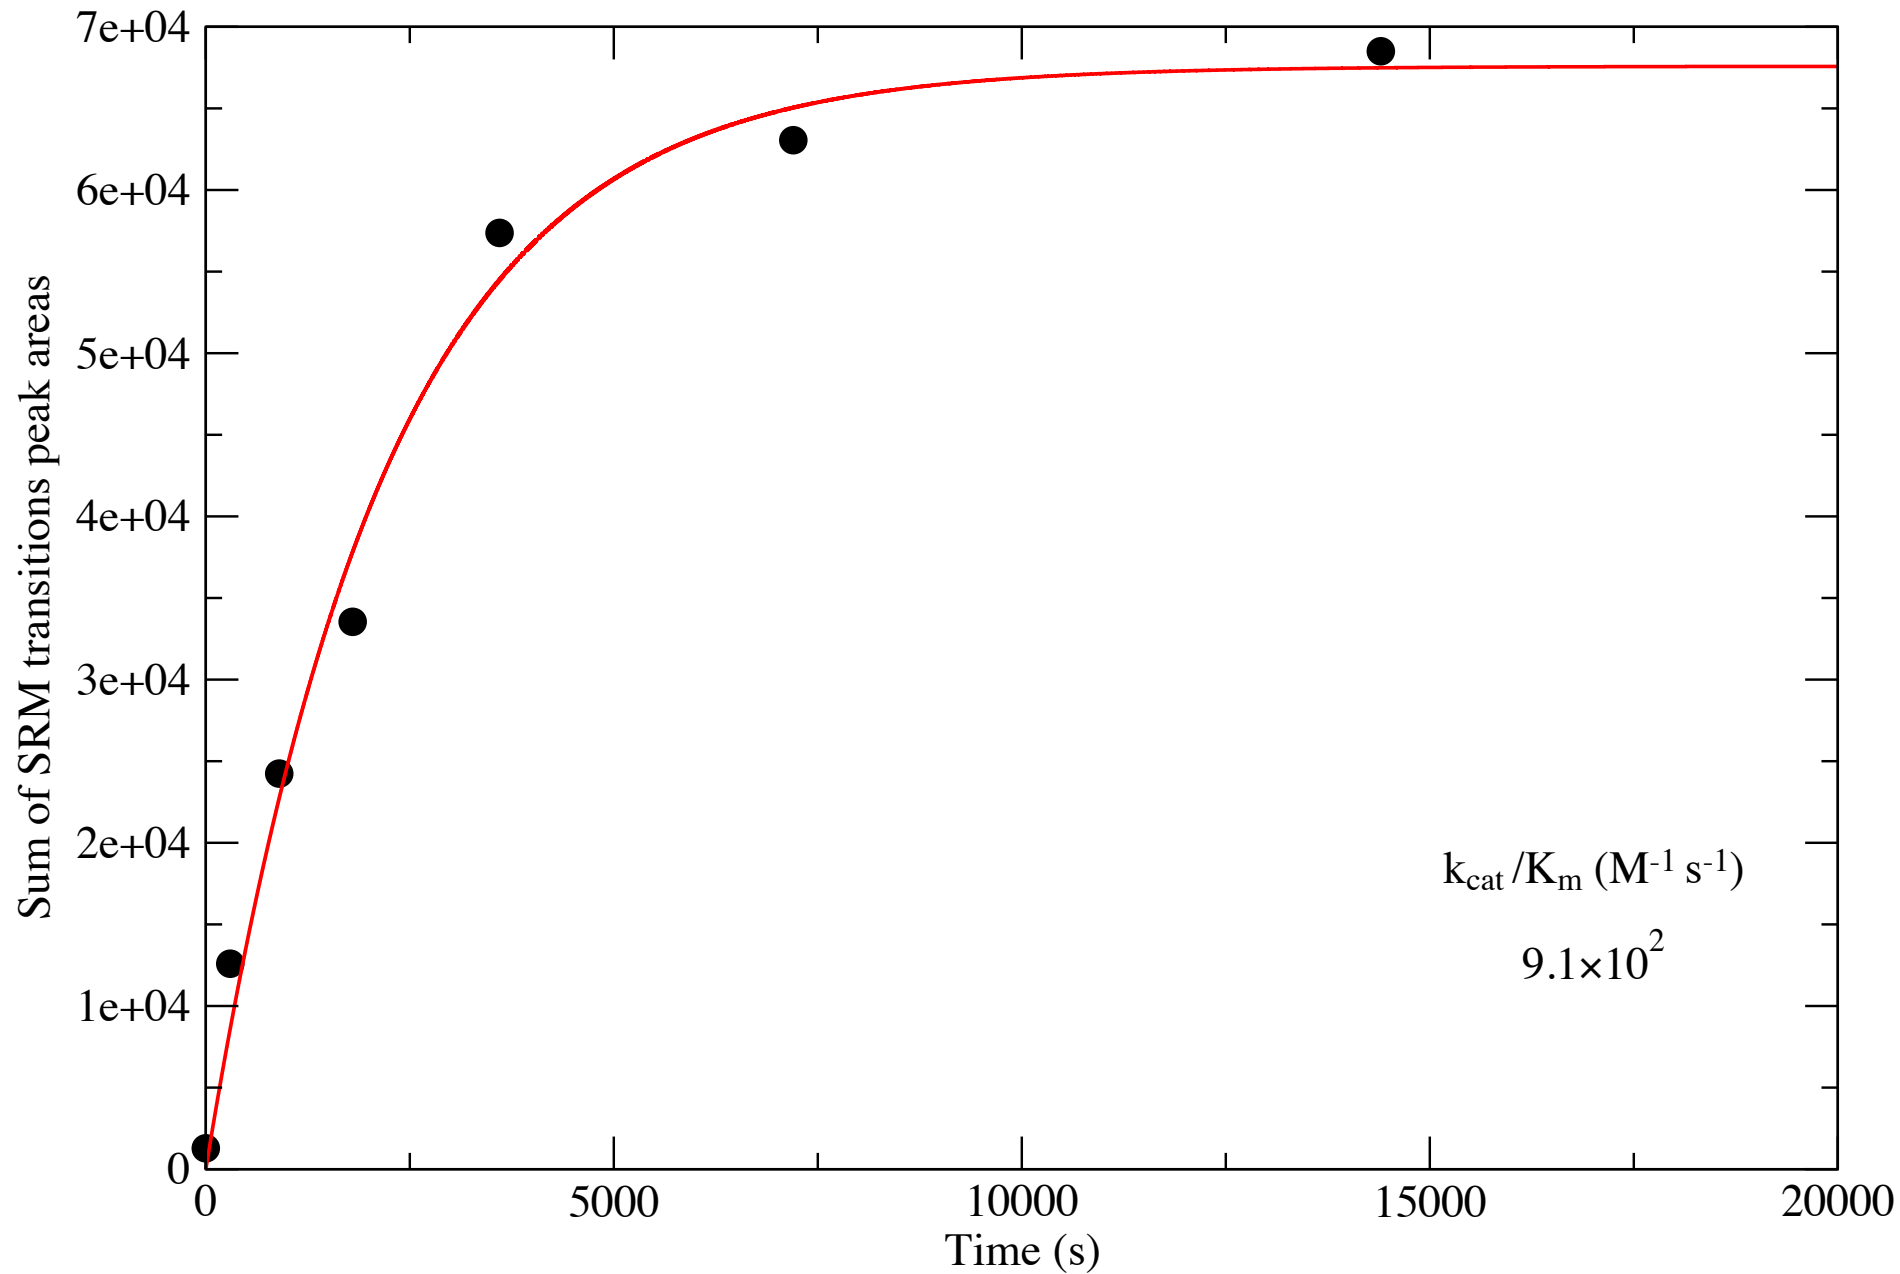

# PREX1\_HUMAN (SAFPLLSLGPR)

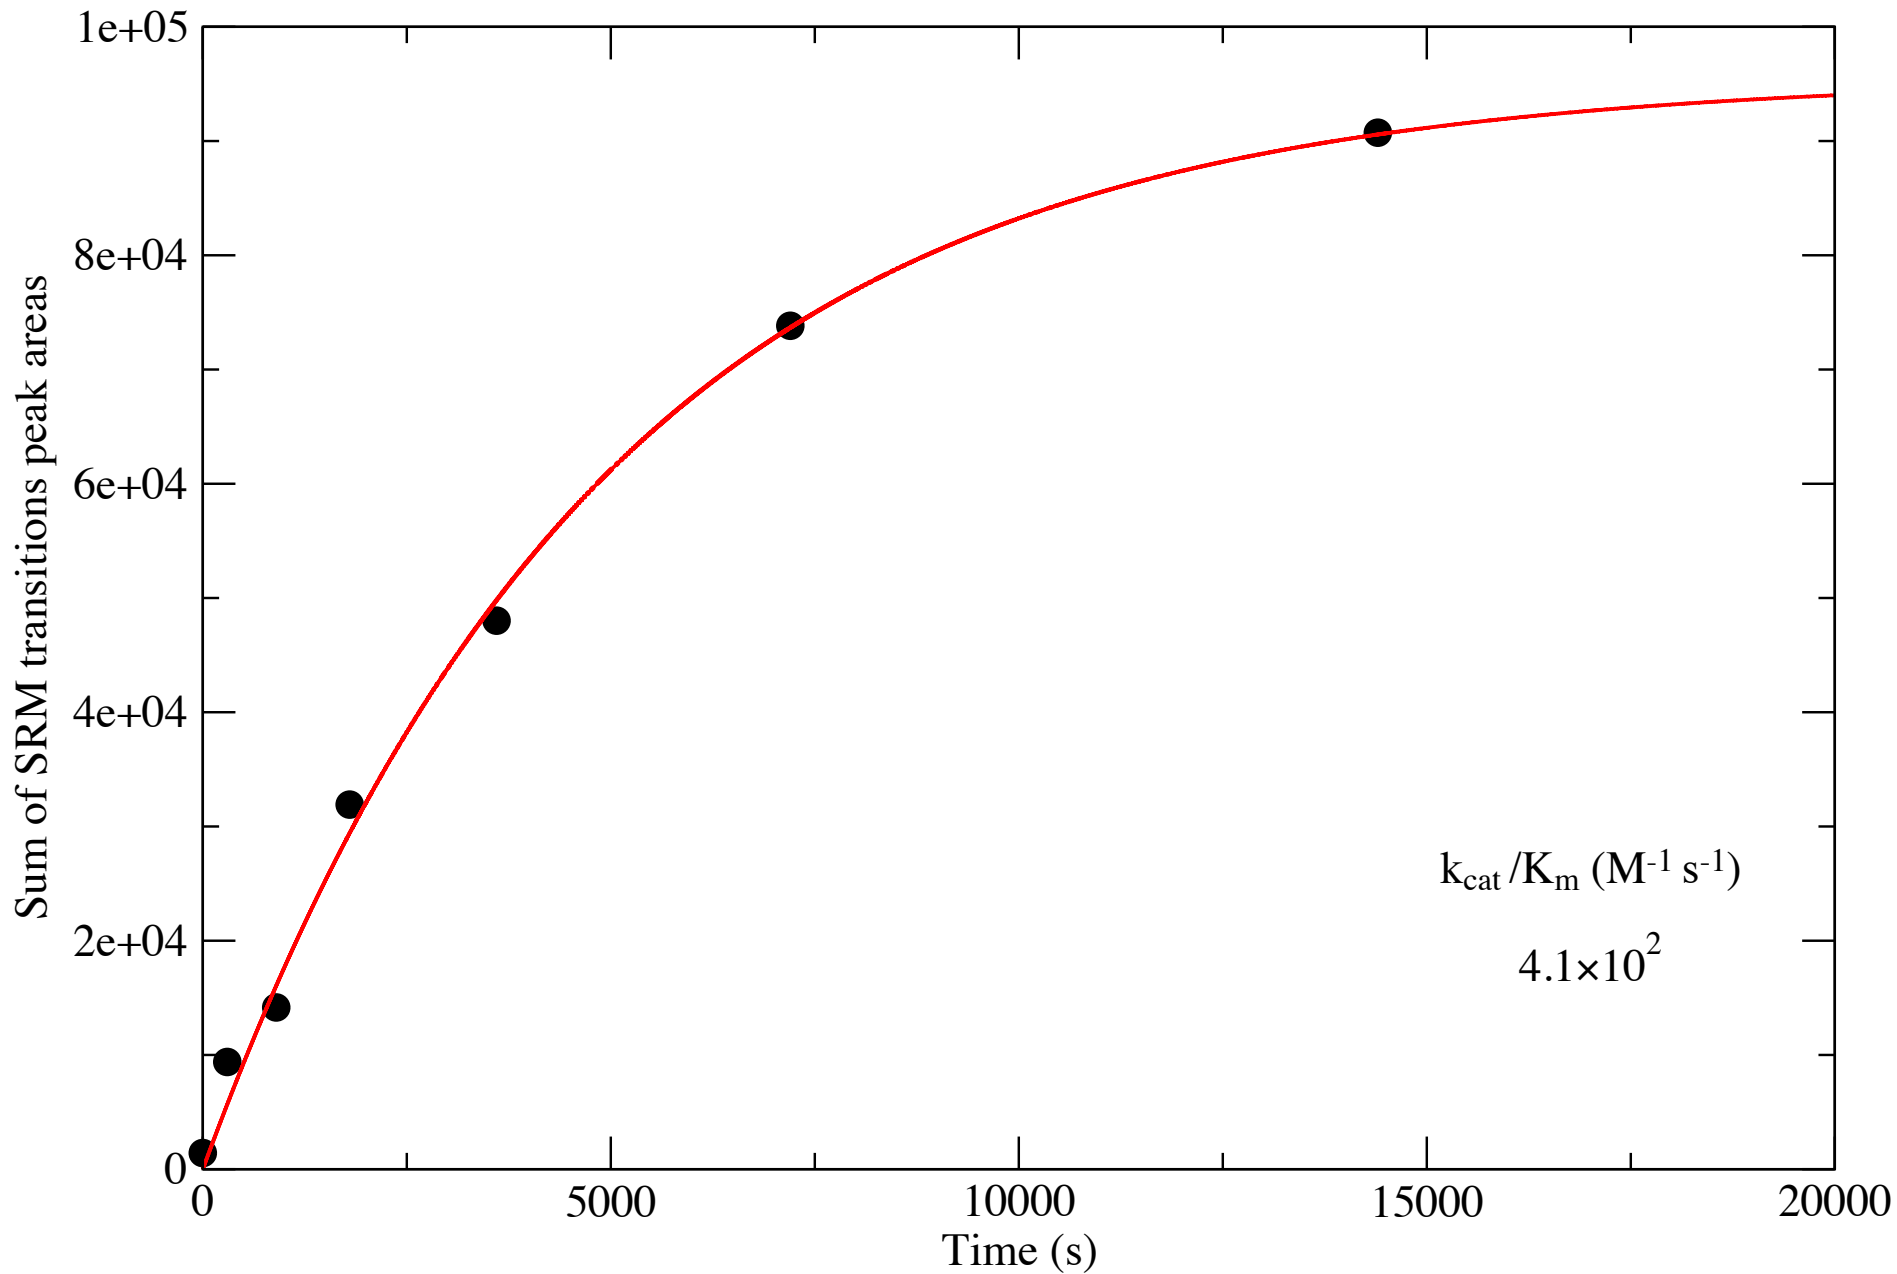

# PRKDC\_HUMAN (GDPSDRMEVQEQEEDISSLIR)

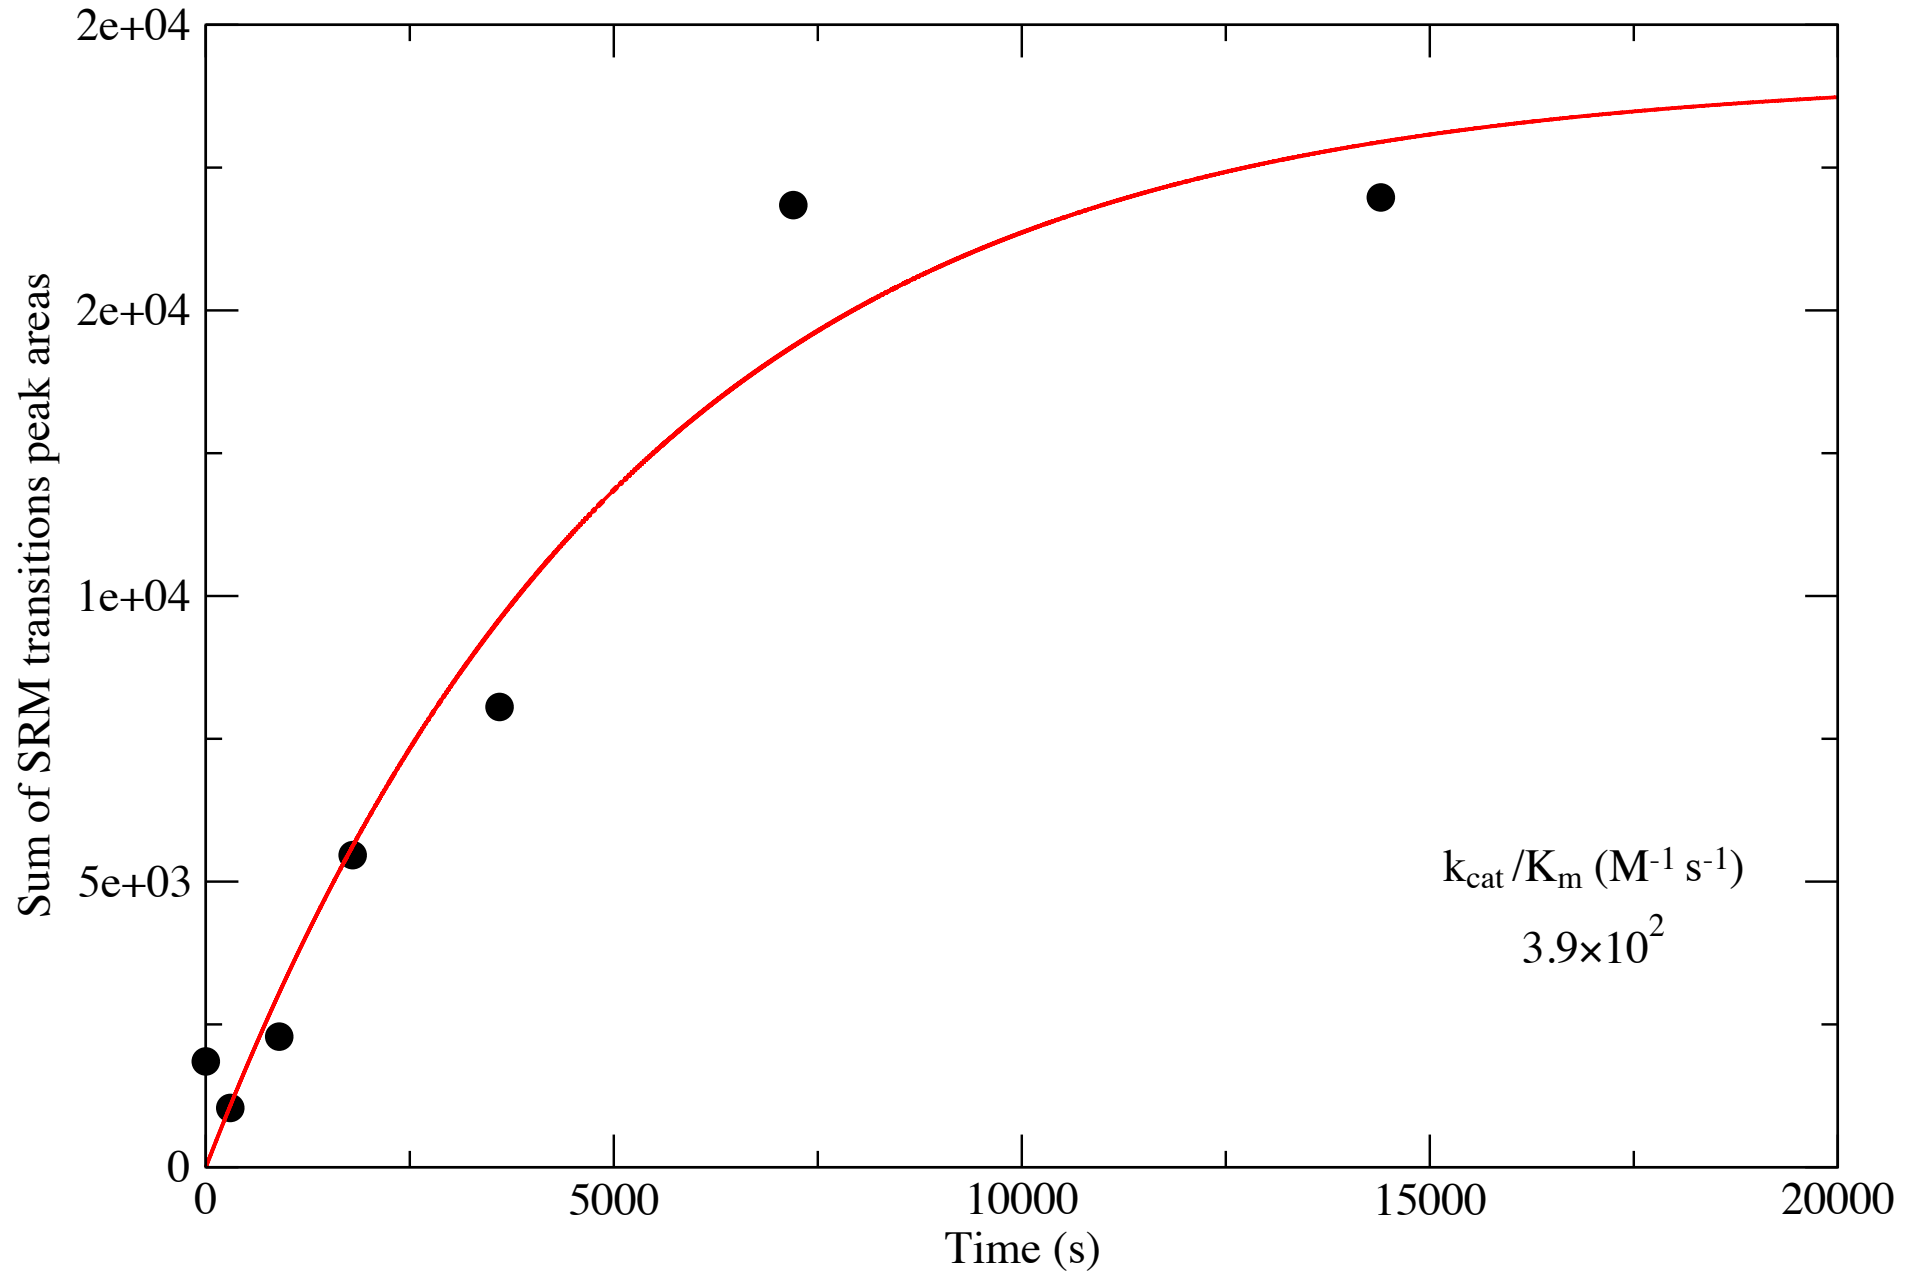

# PRP17\_HUMAN (GFLGPWAK)

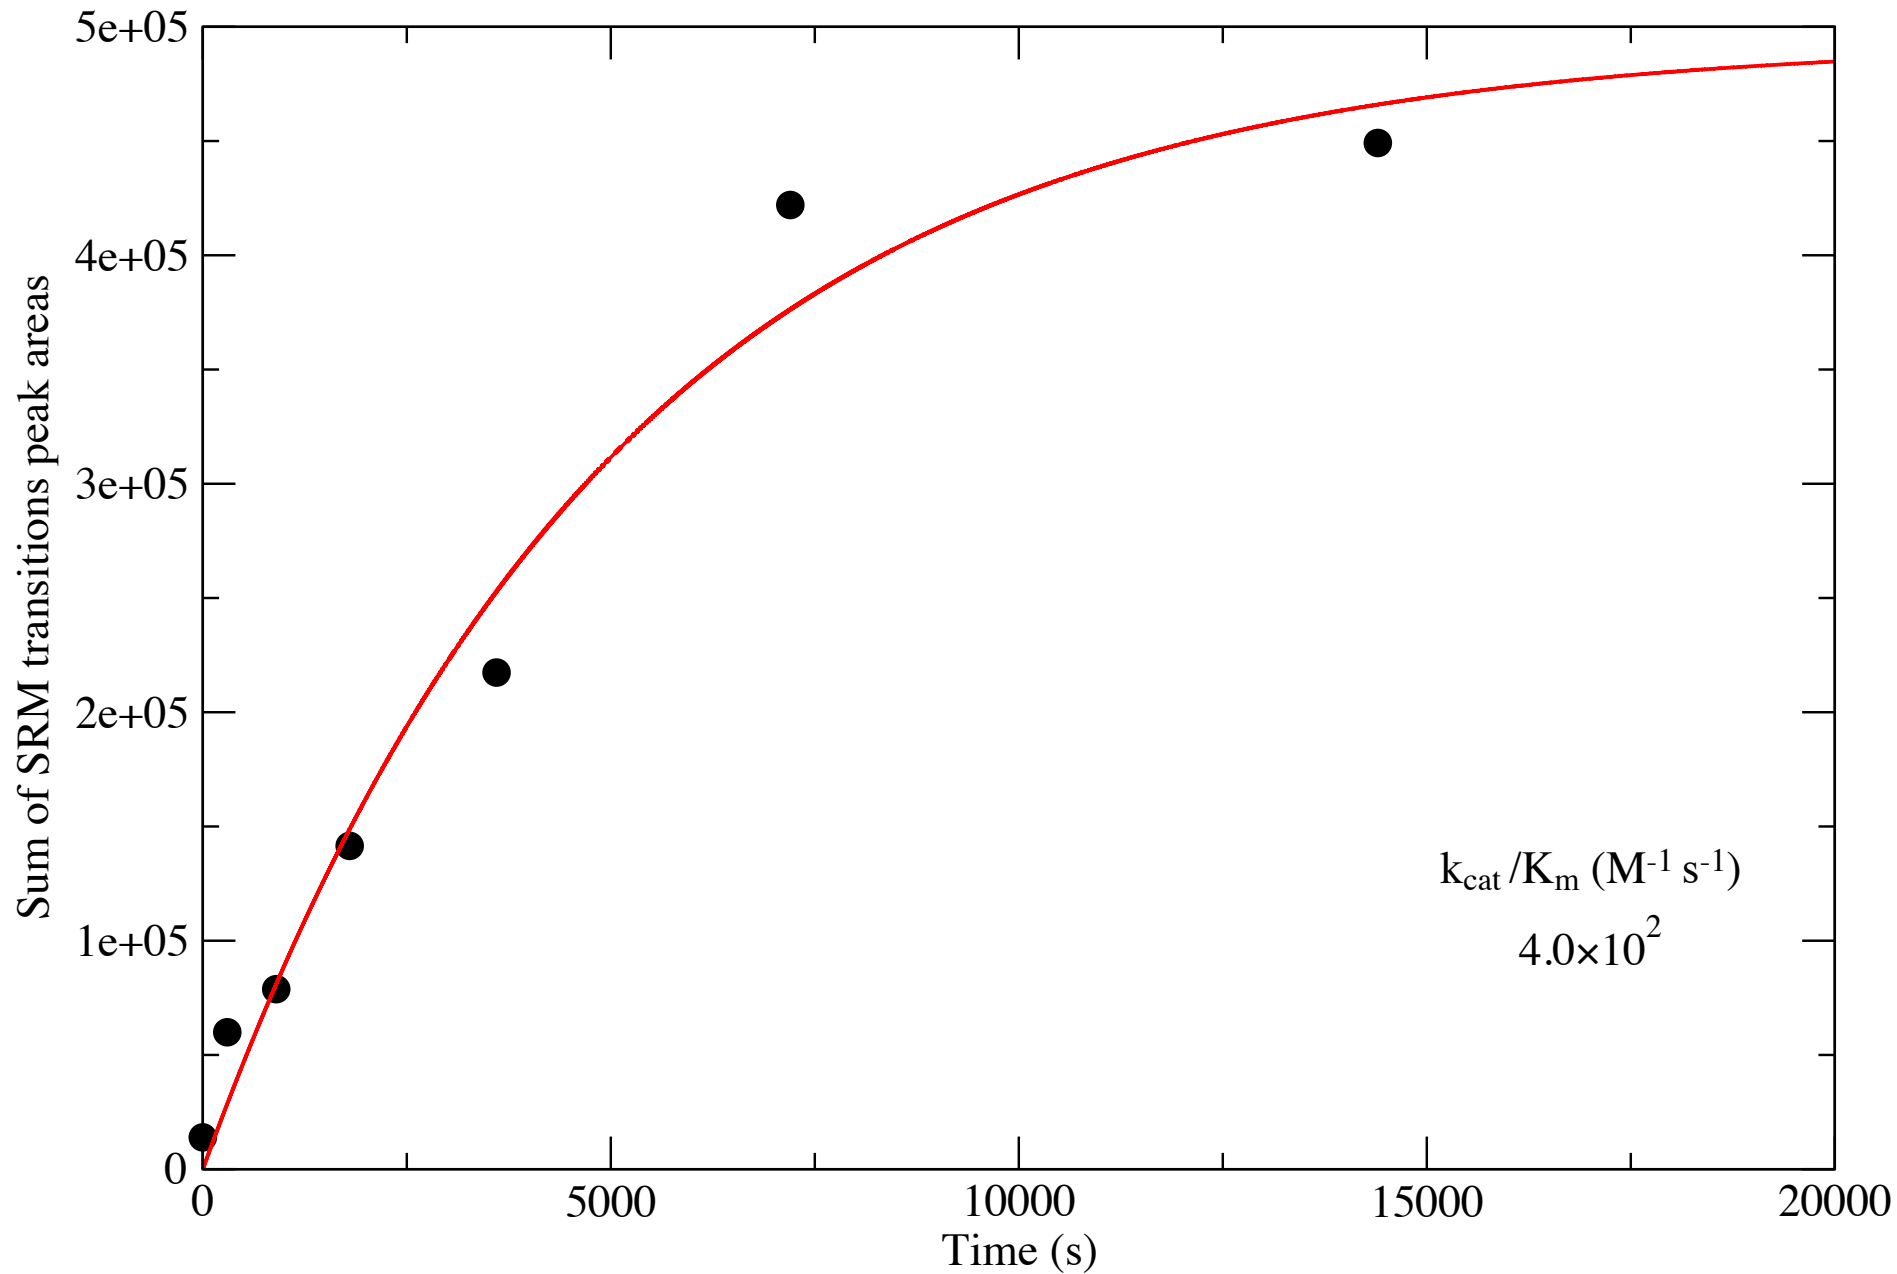

# PRP17\_HUMAN (SAPEVAVK)

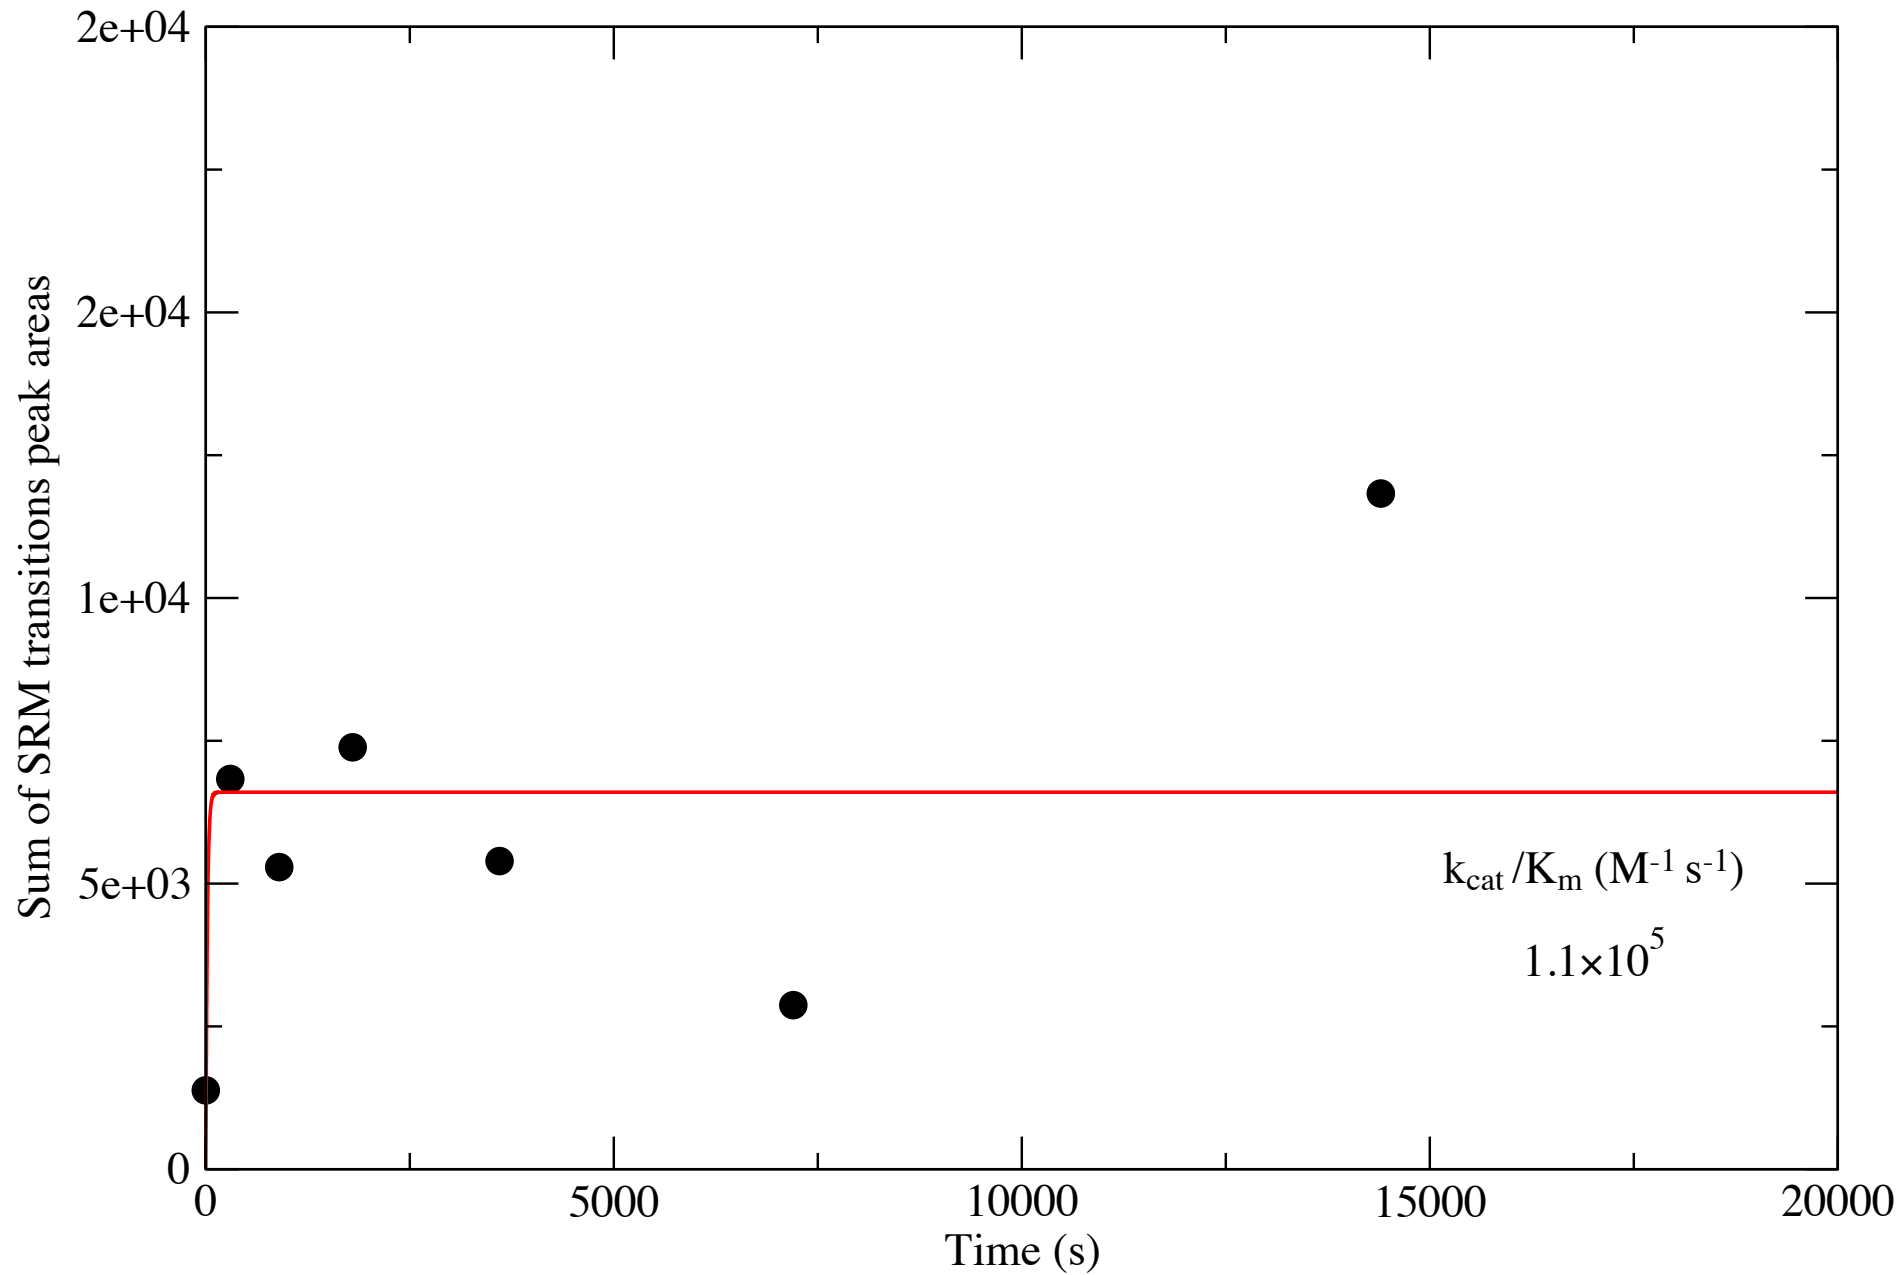

# PRP31\_HUMAN (AYQEDLGFSLGHLGK)

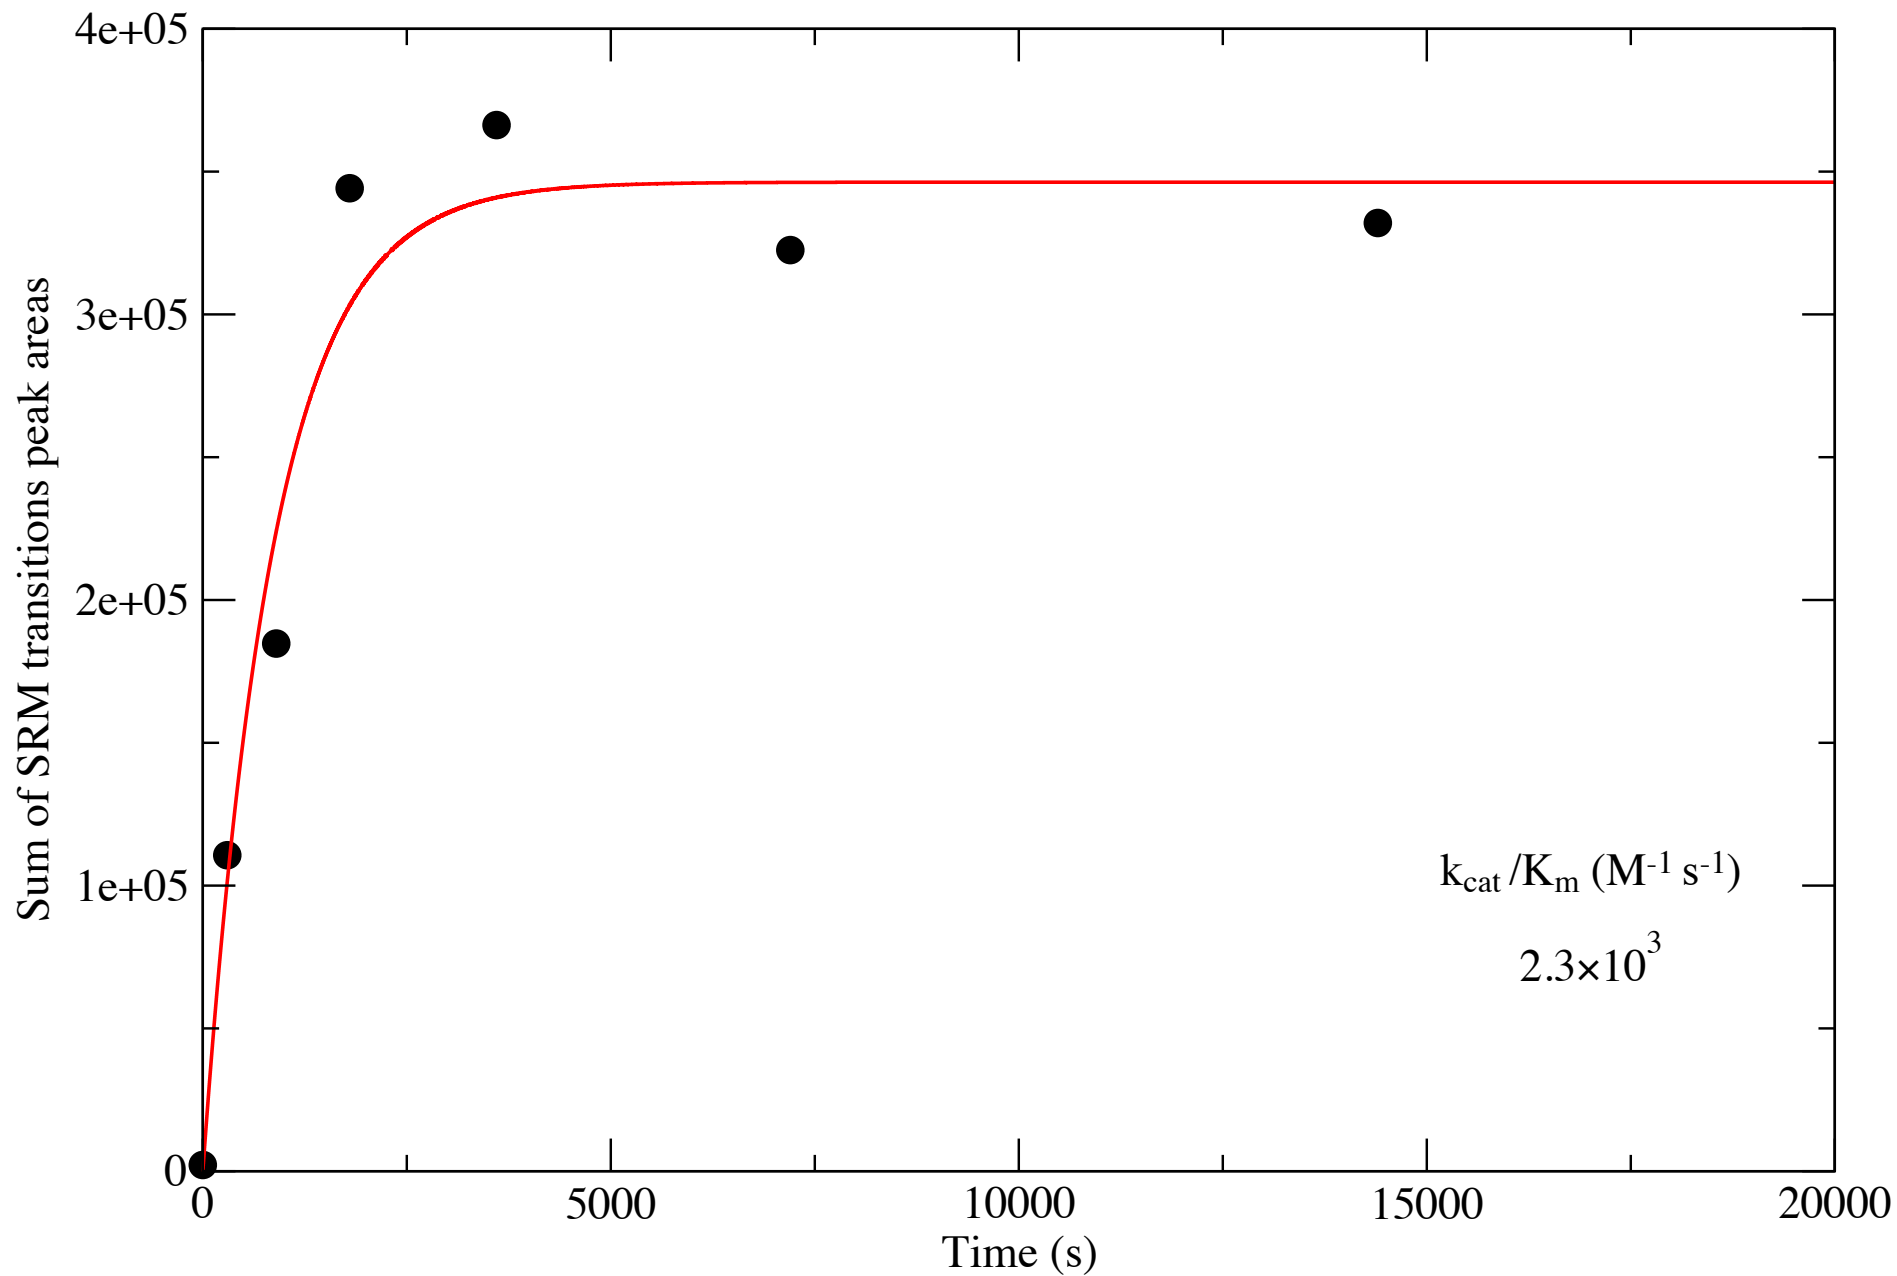



# PRS6A\_HUMAN (GIGEEVLK)

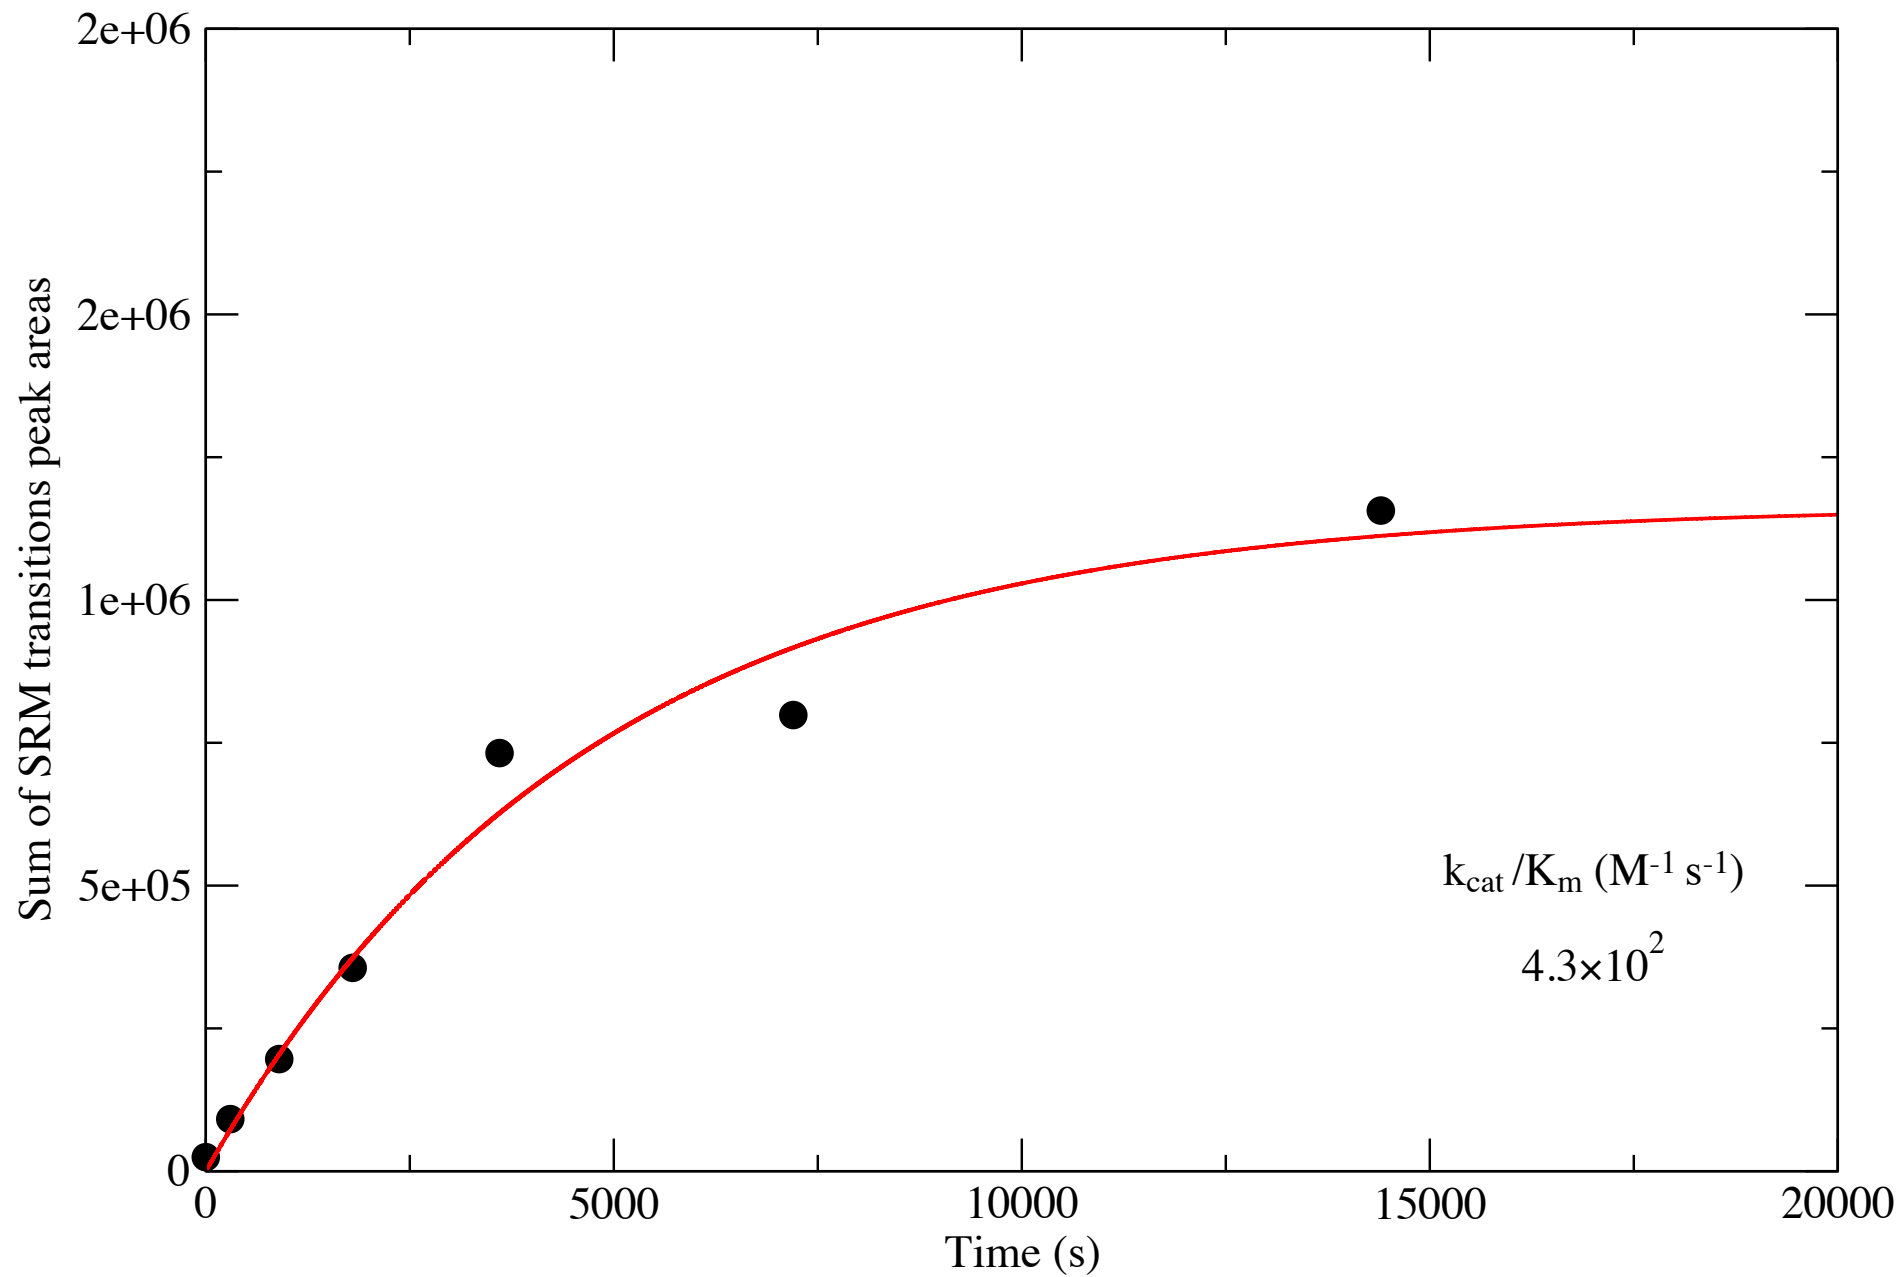

# PRS8\_HUMAN (SIGSSRLEGGSGGDSEVQR)

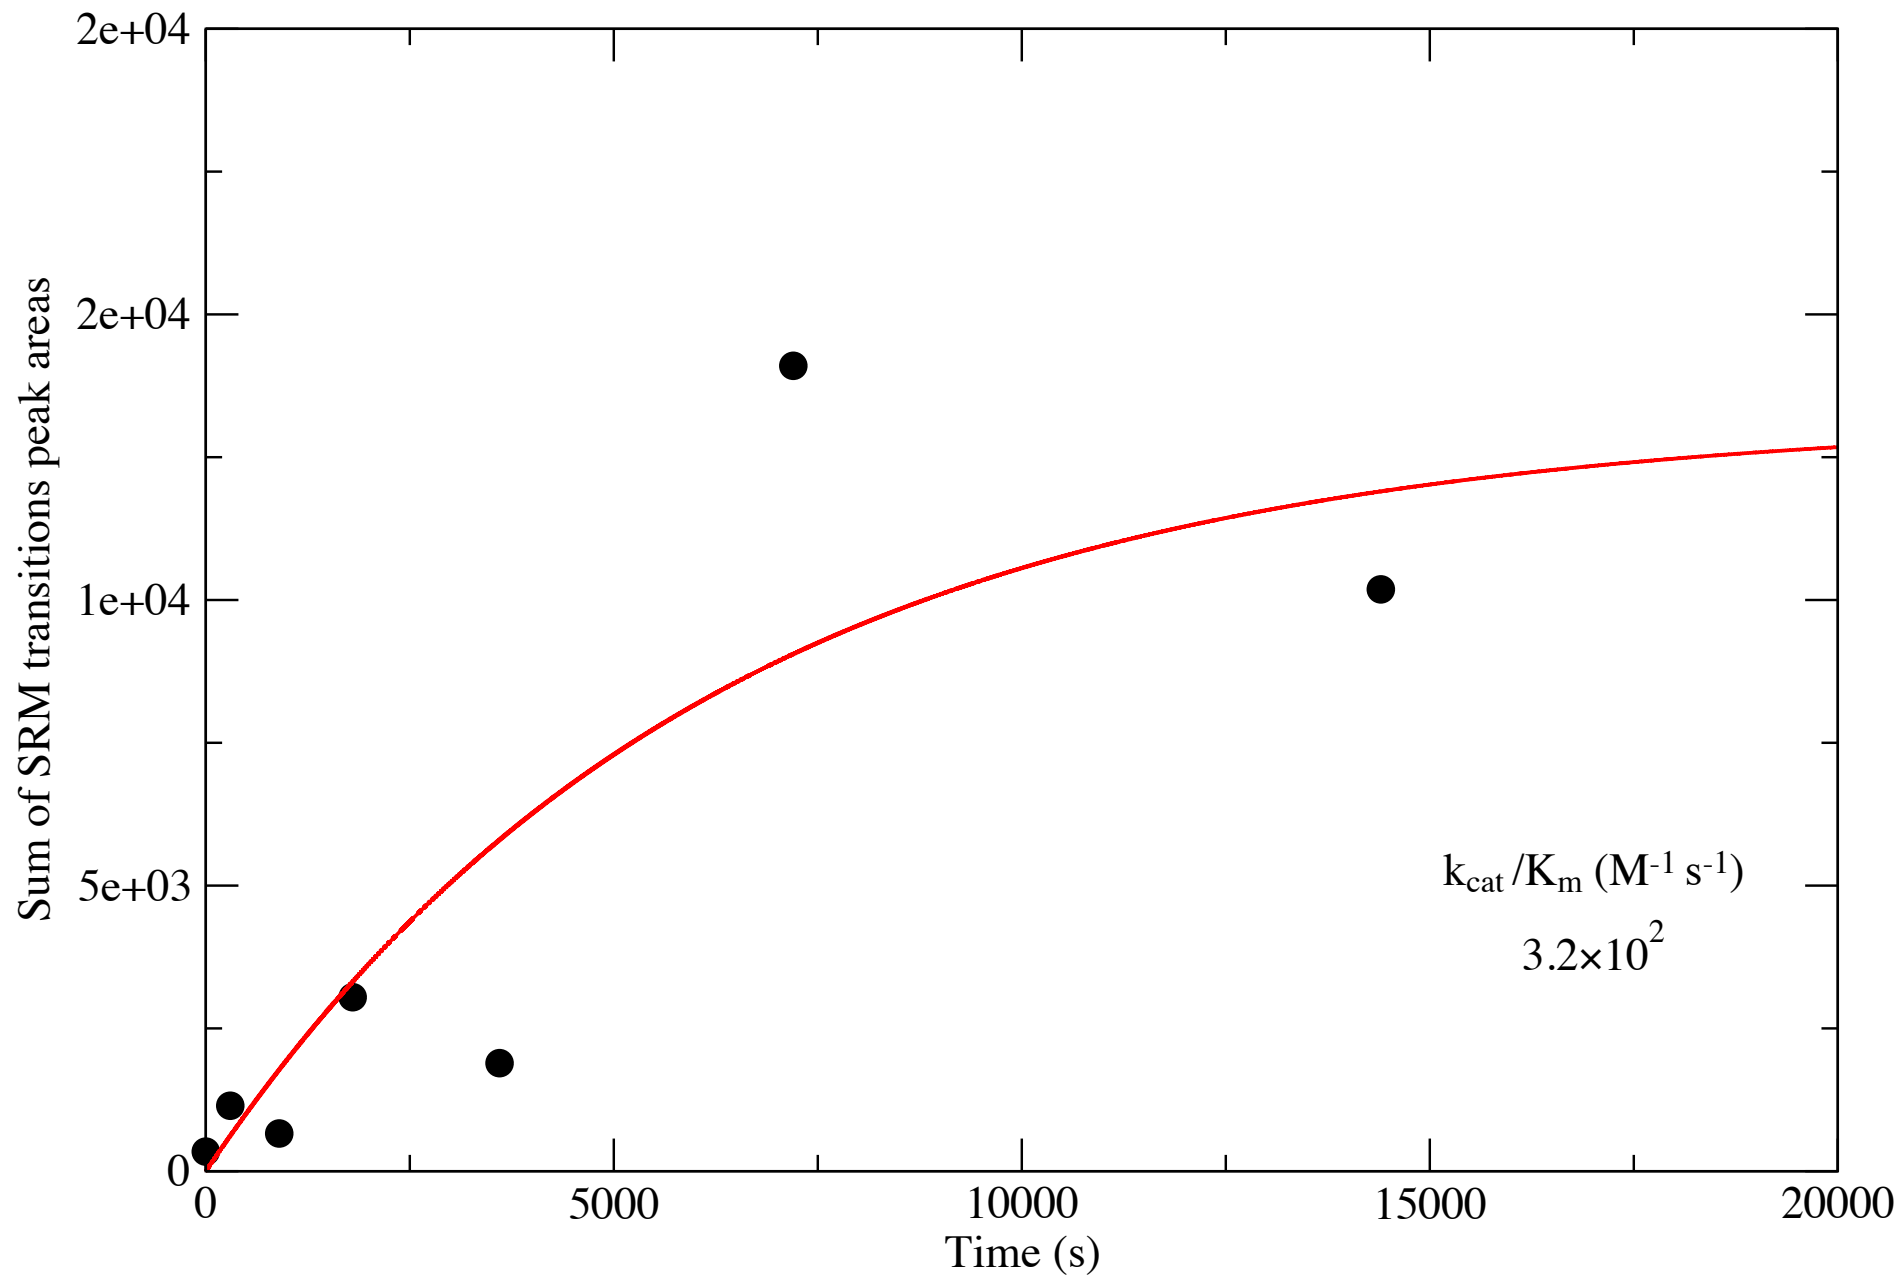

# PSA5\_HUMAN (AHIGCAMSGLIADAK)

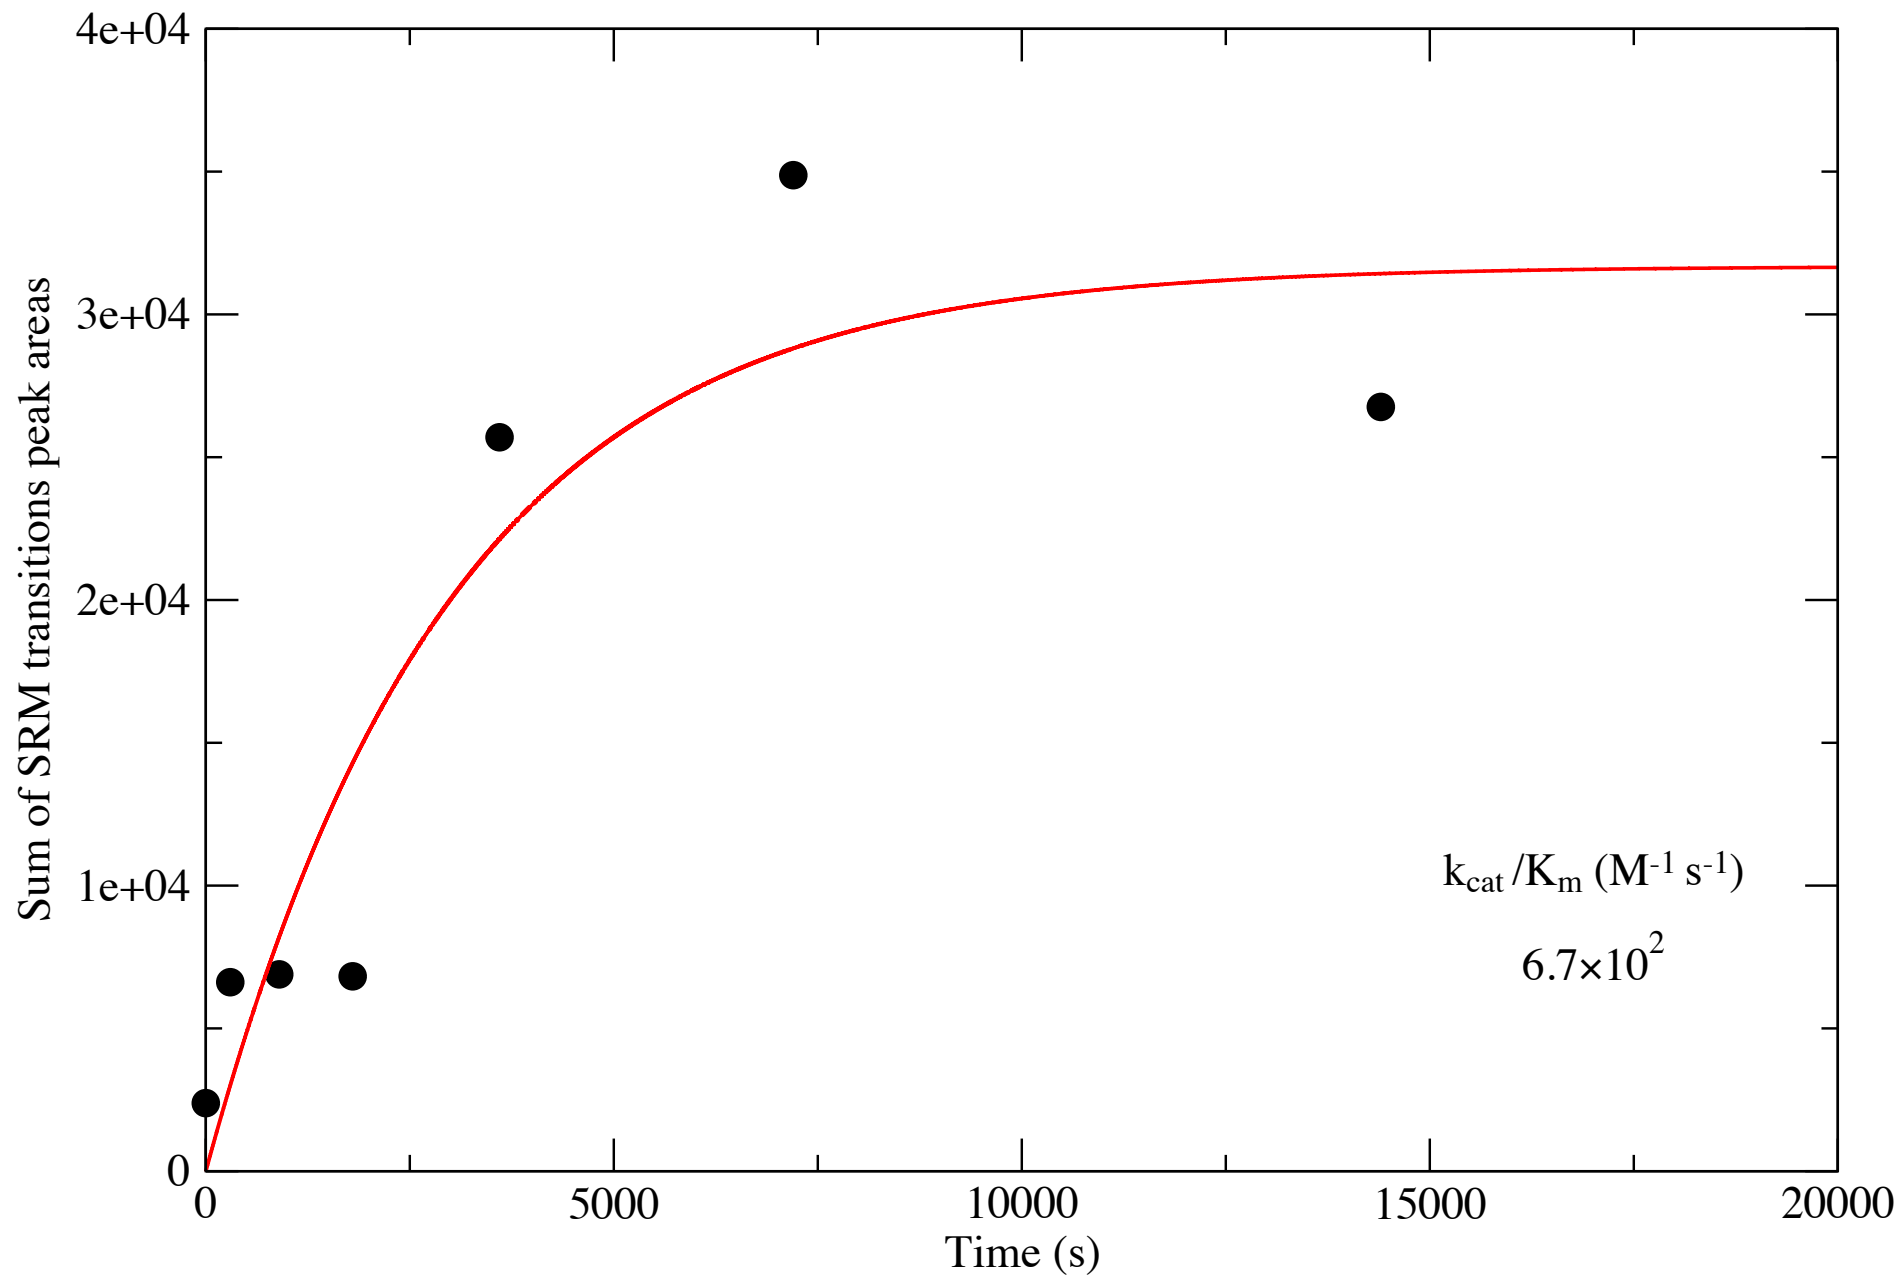

# PSB10\_HUMAN (GVILGADTR)

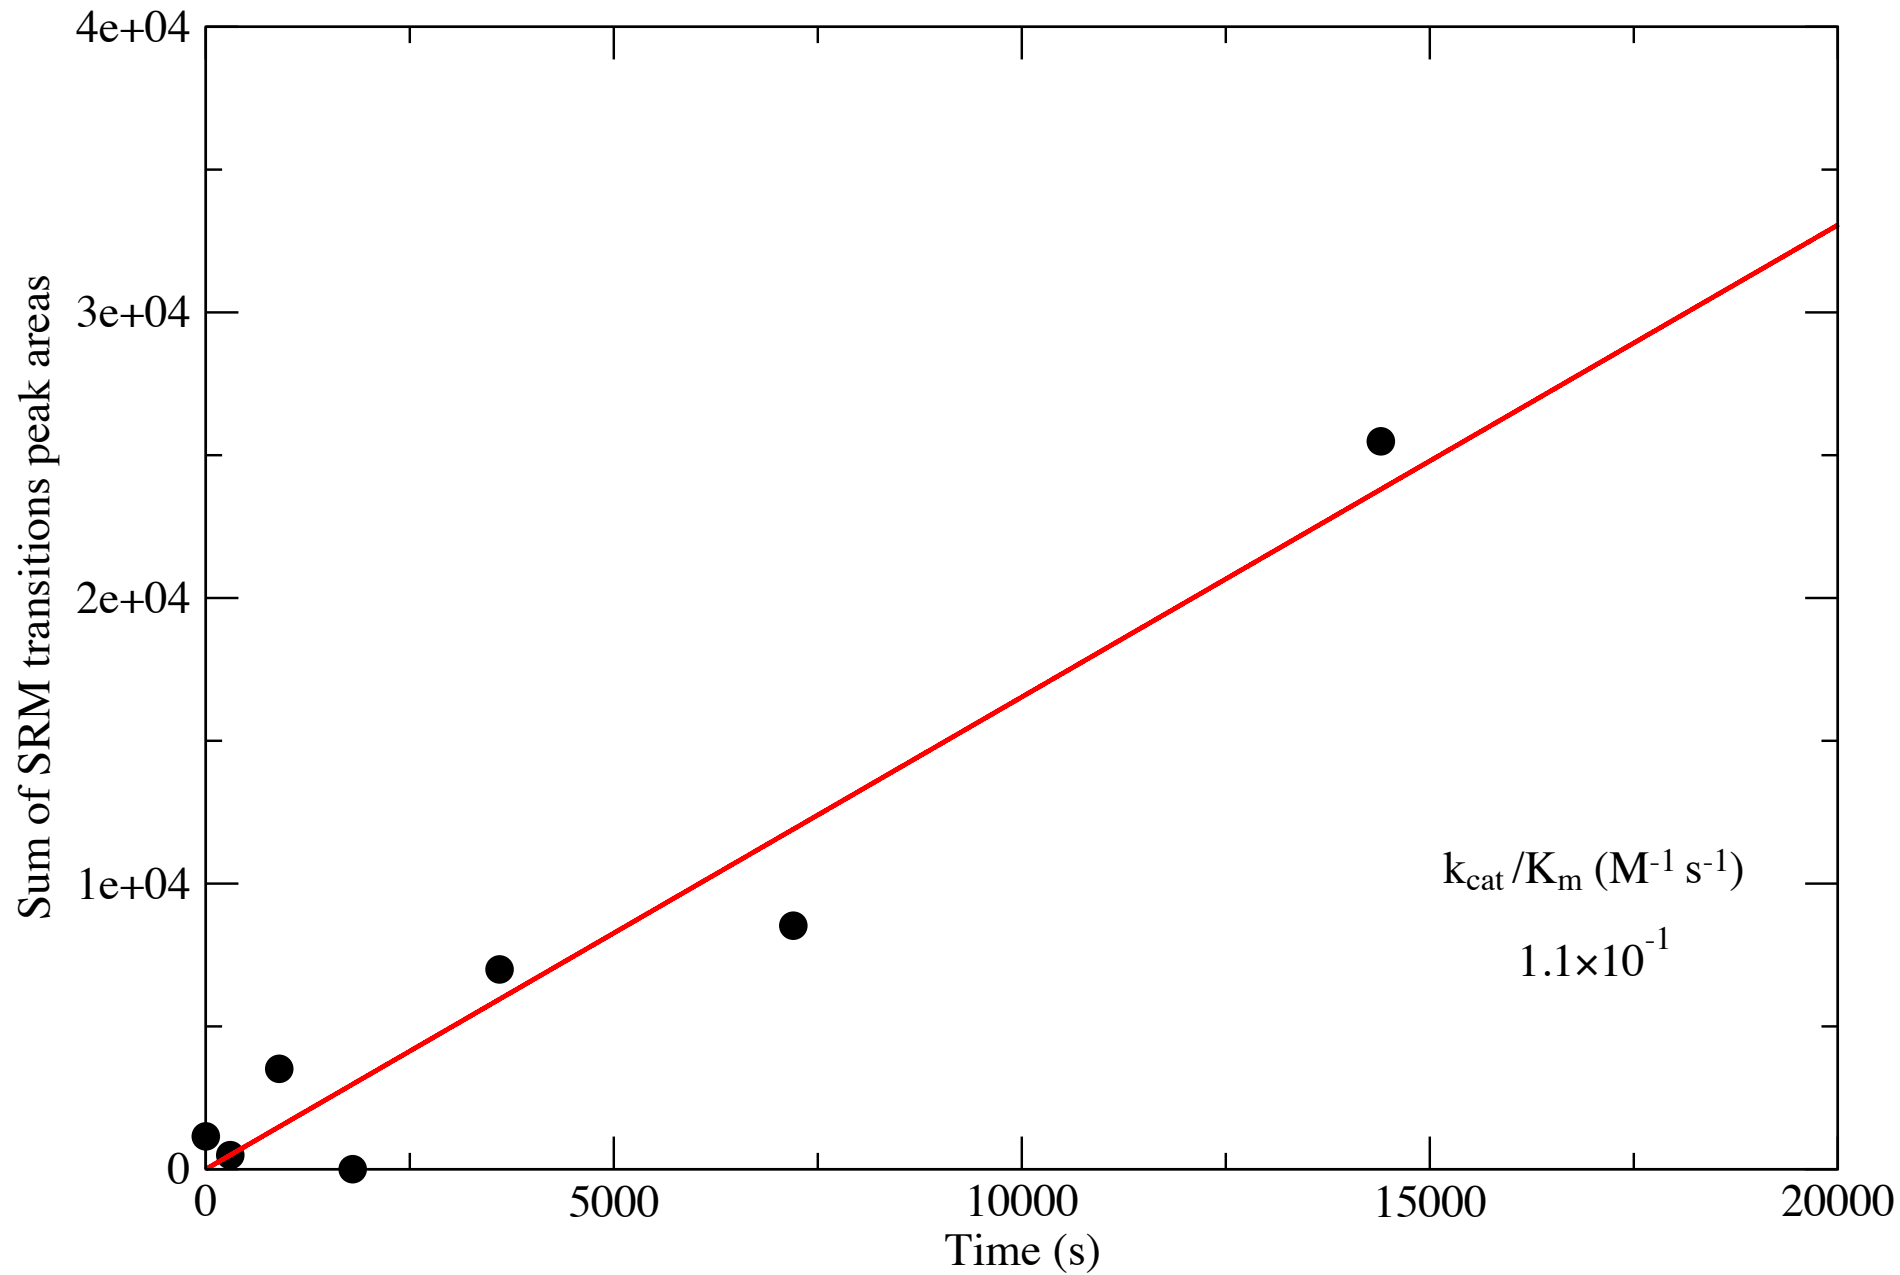

# PSB7\_HUMAN (GIVLGADTR)

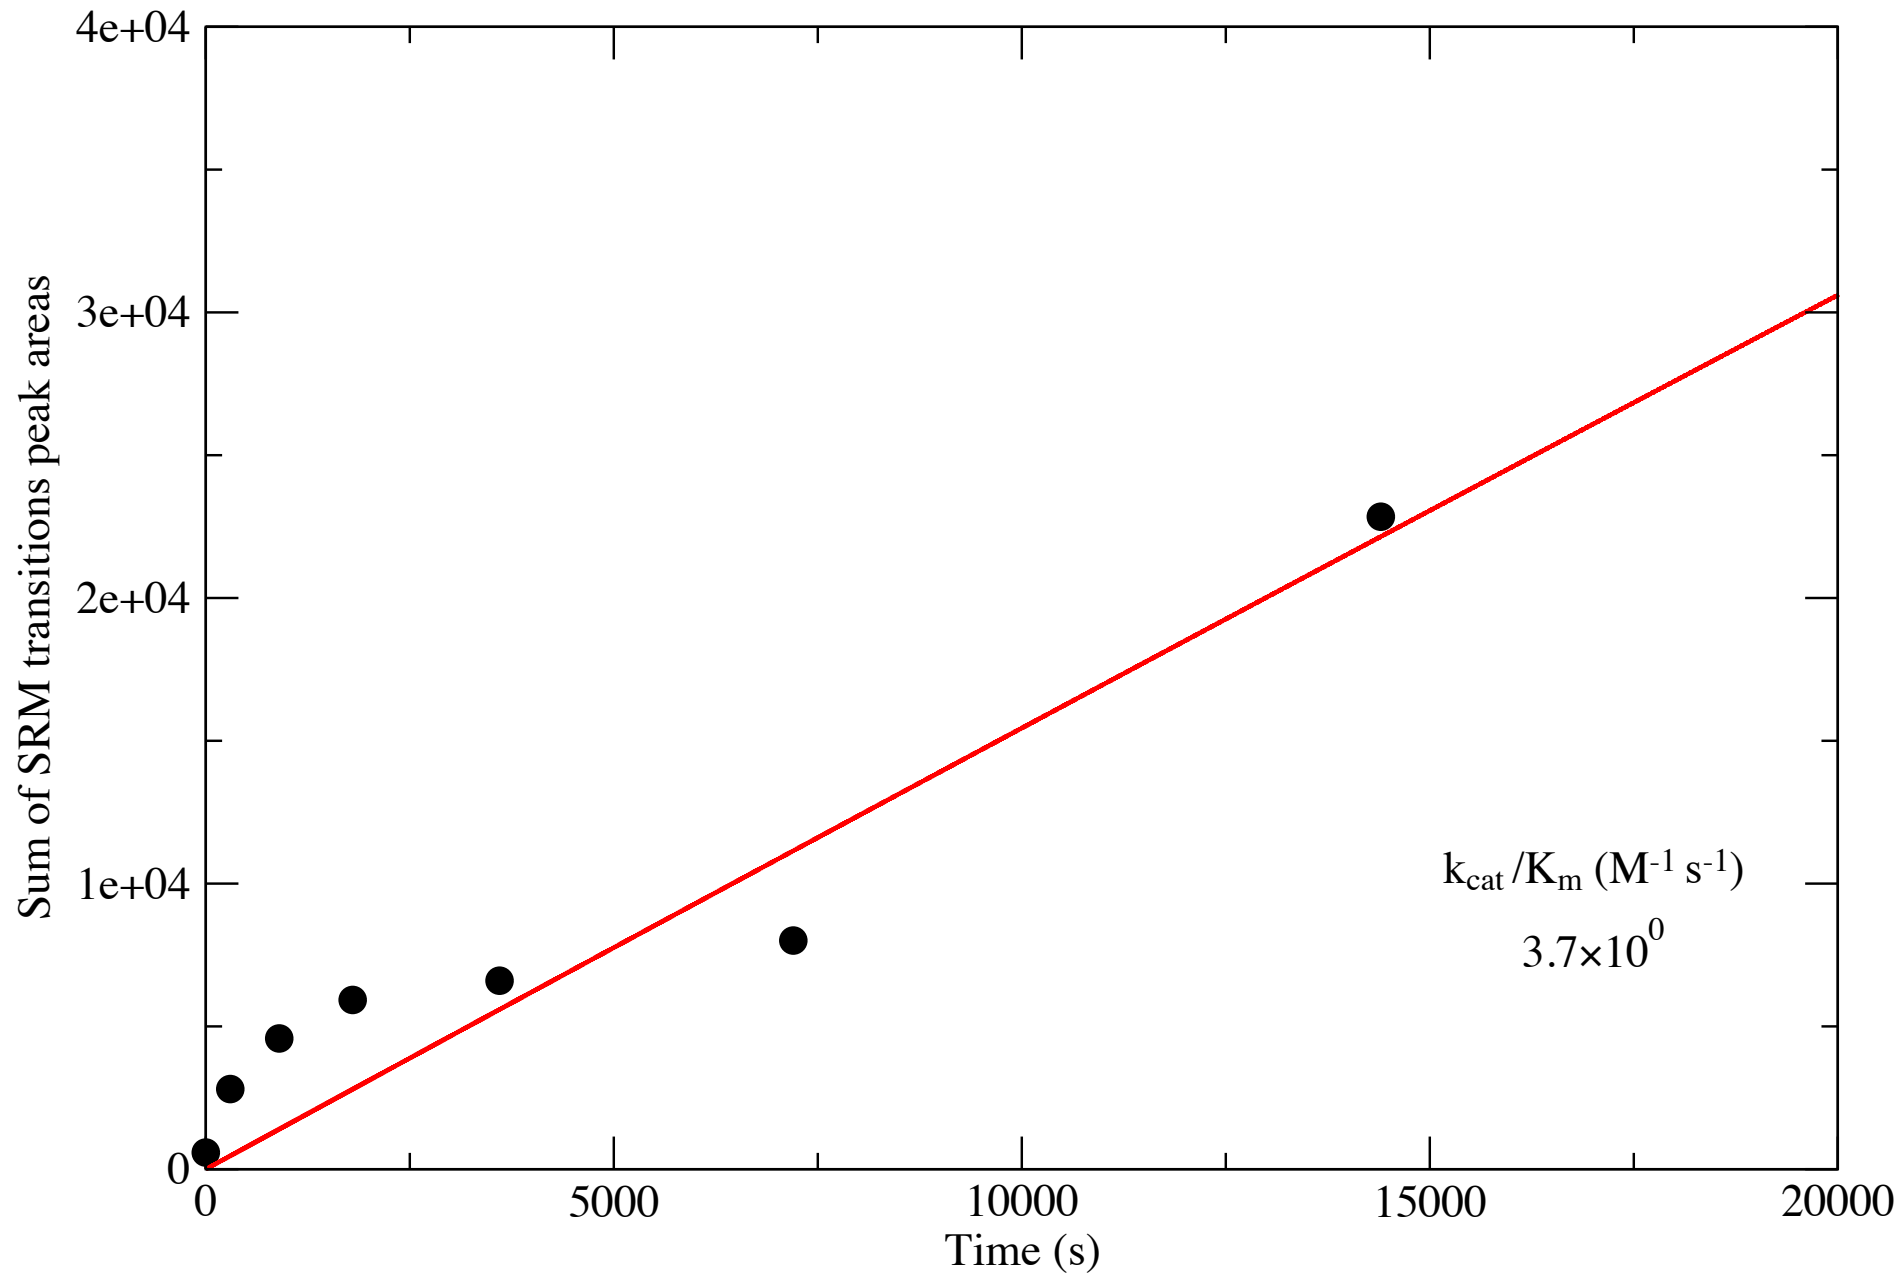

# PSD4\_HUMAN (GLEPCQEQR)

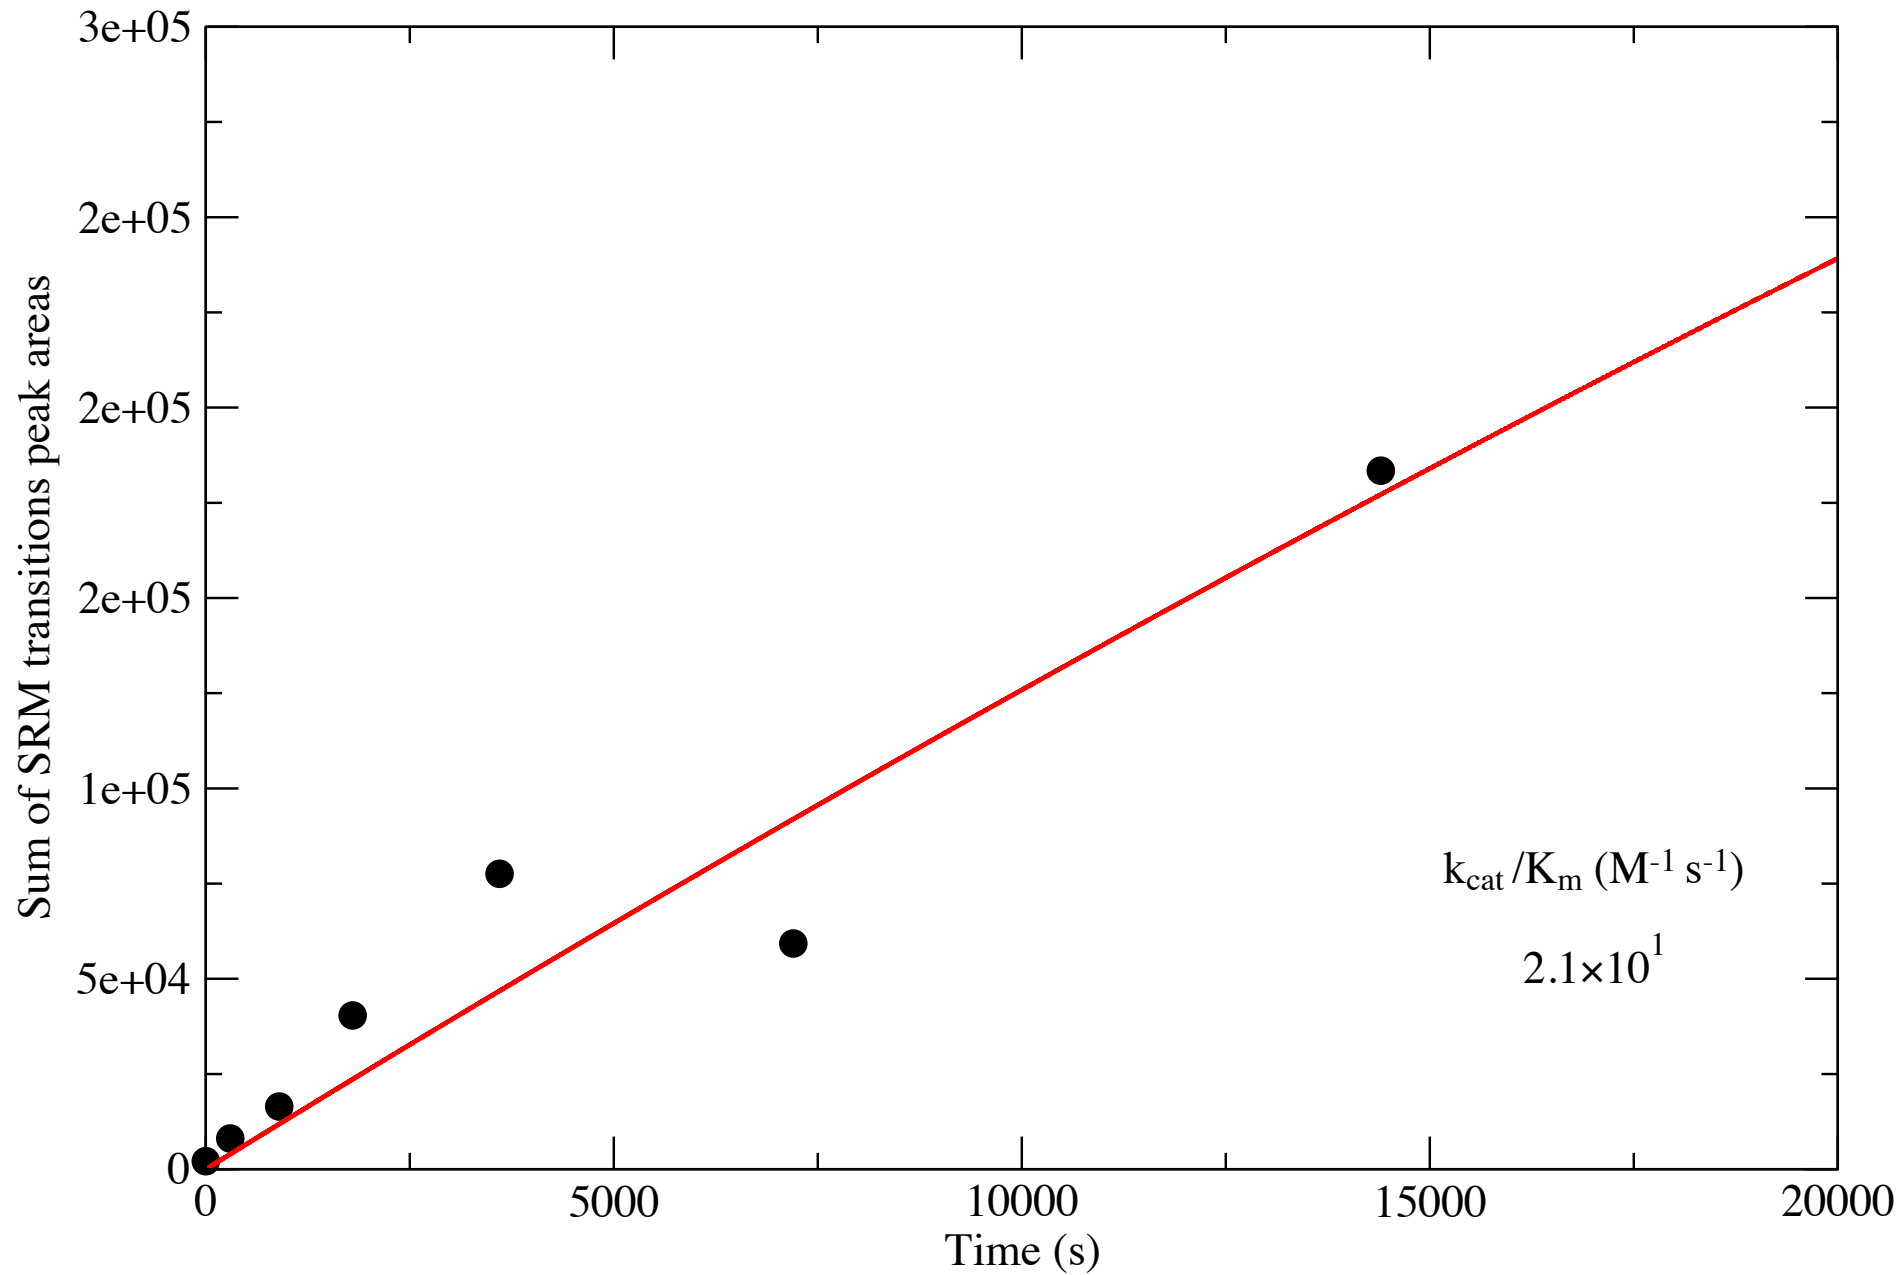

# PTBP1\_HUMAN (GIVPDIAVGTK)

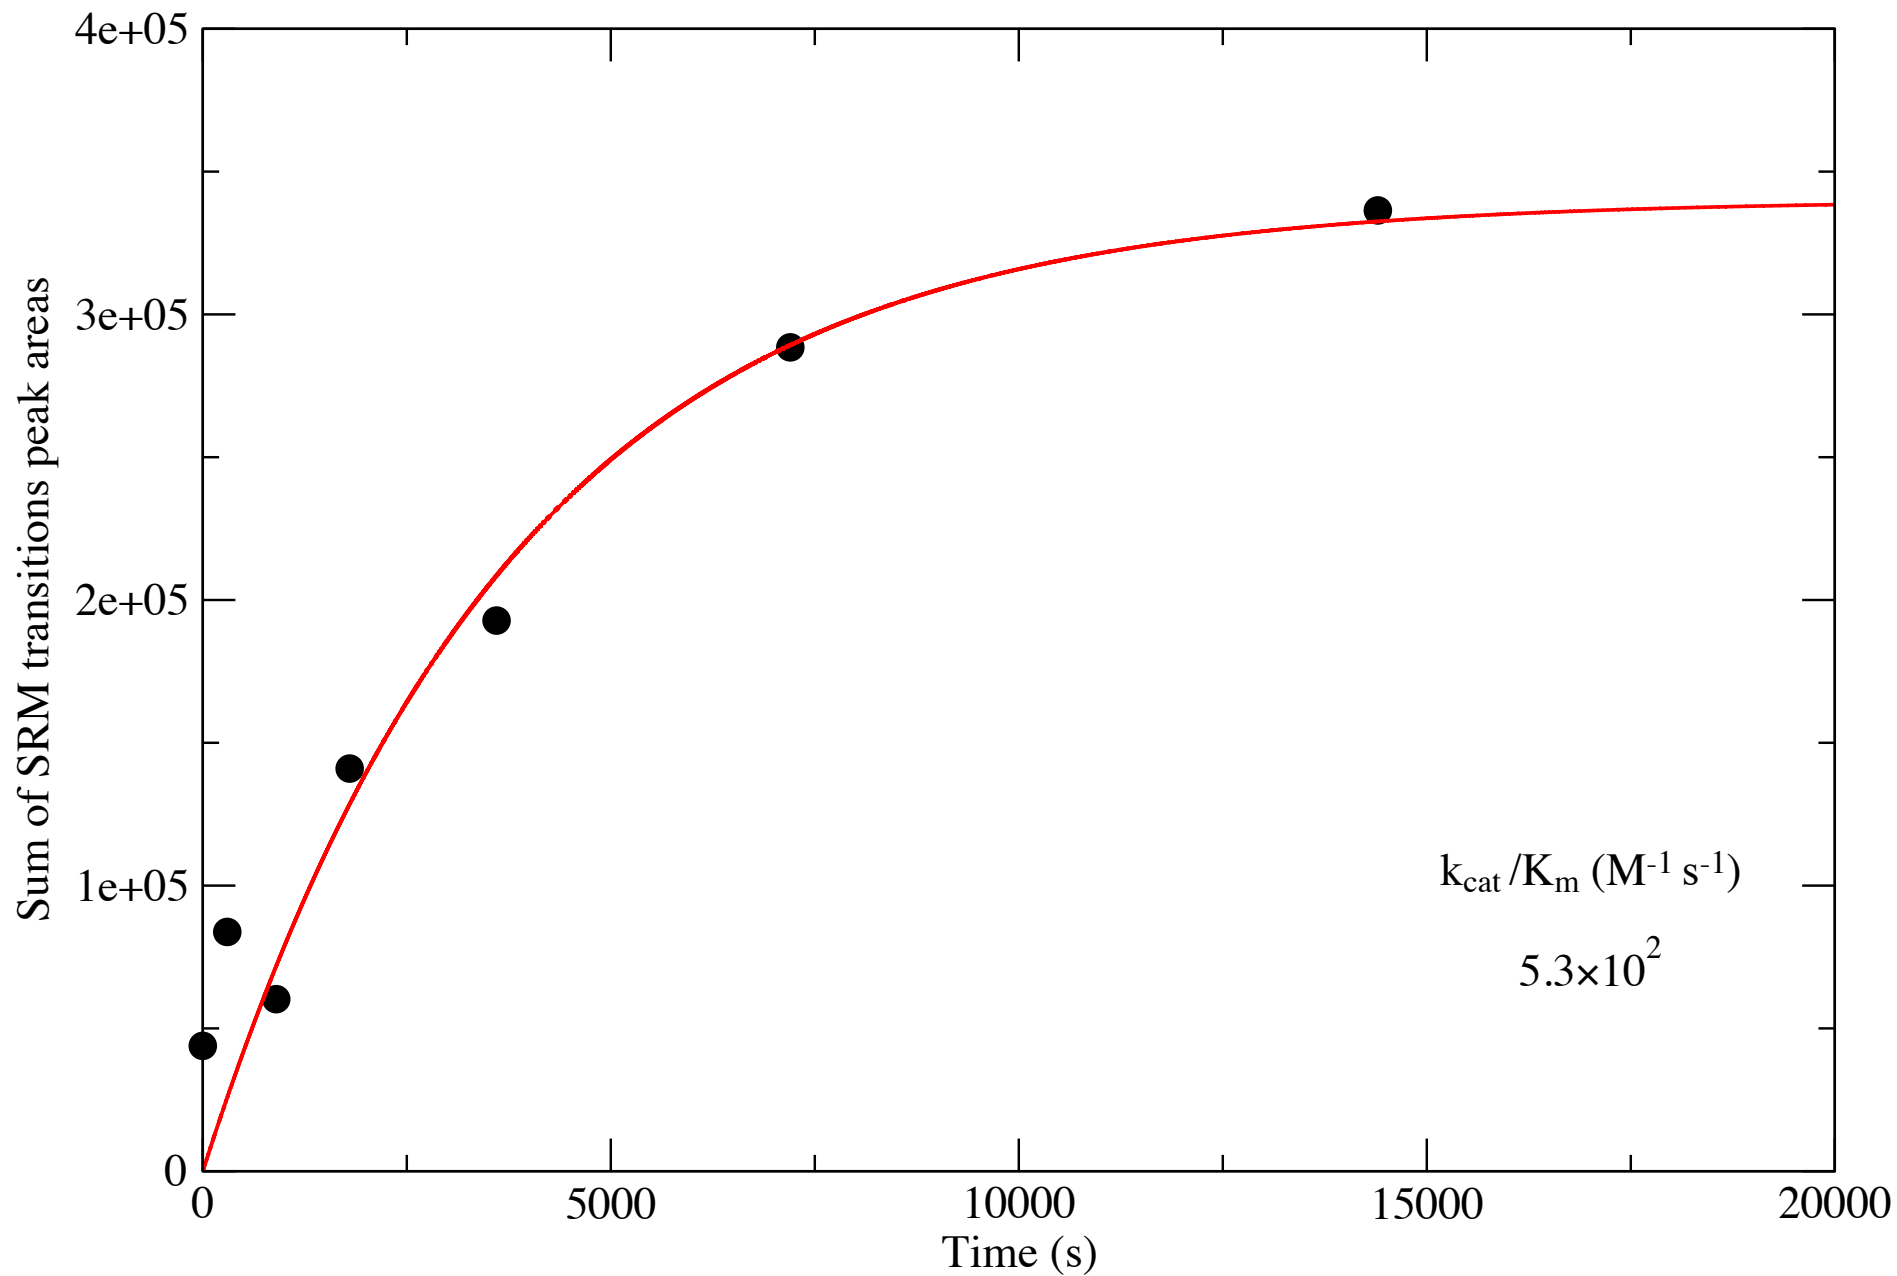

# RBBP6\_HUMAN (AVVIPCCGNSYCDECIR)

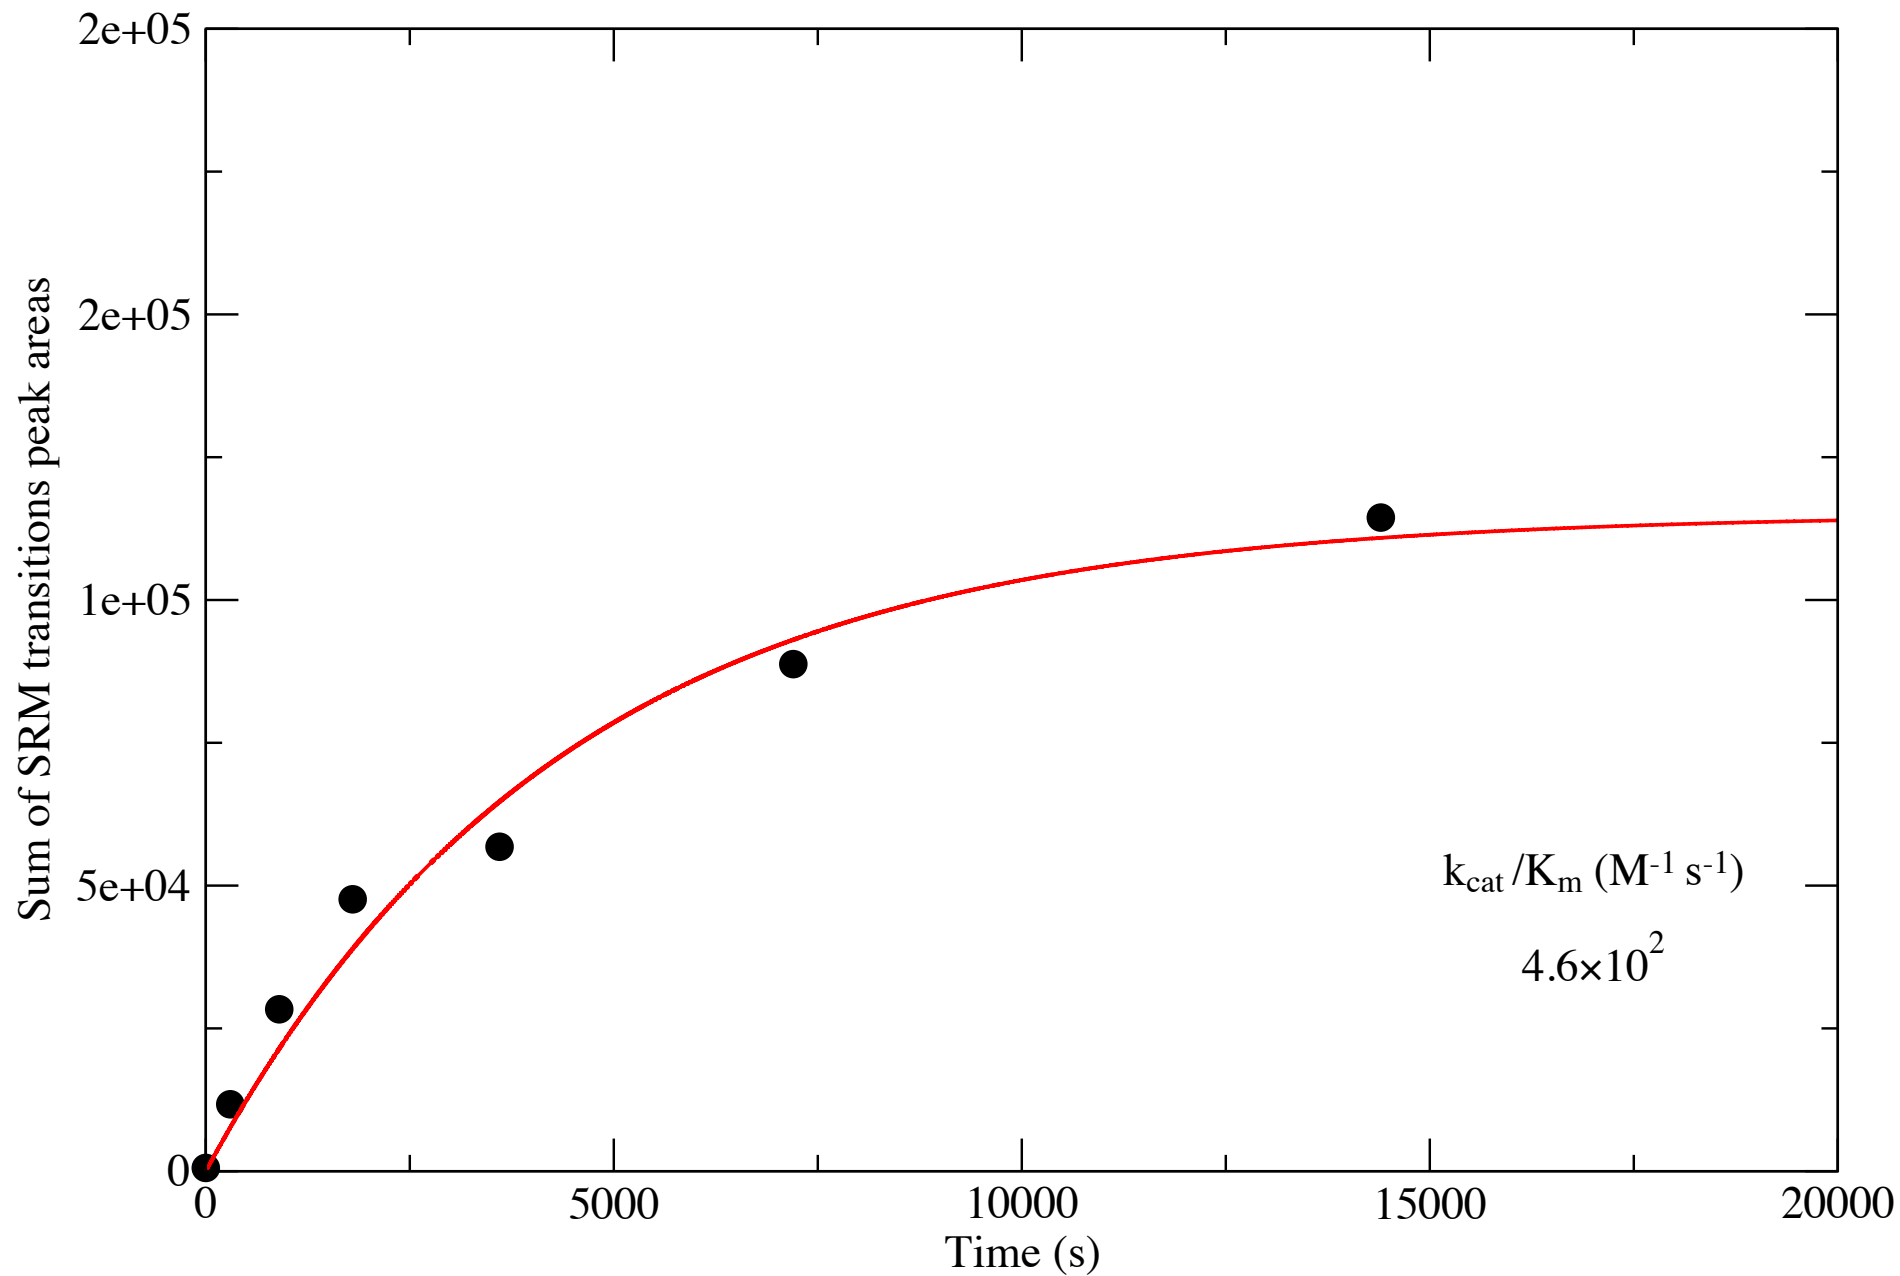



# RBM19\_HUMAN (SSATPVLQER)

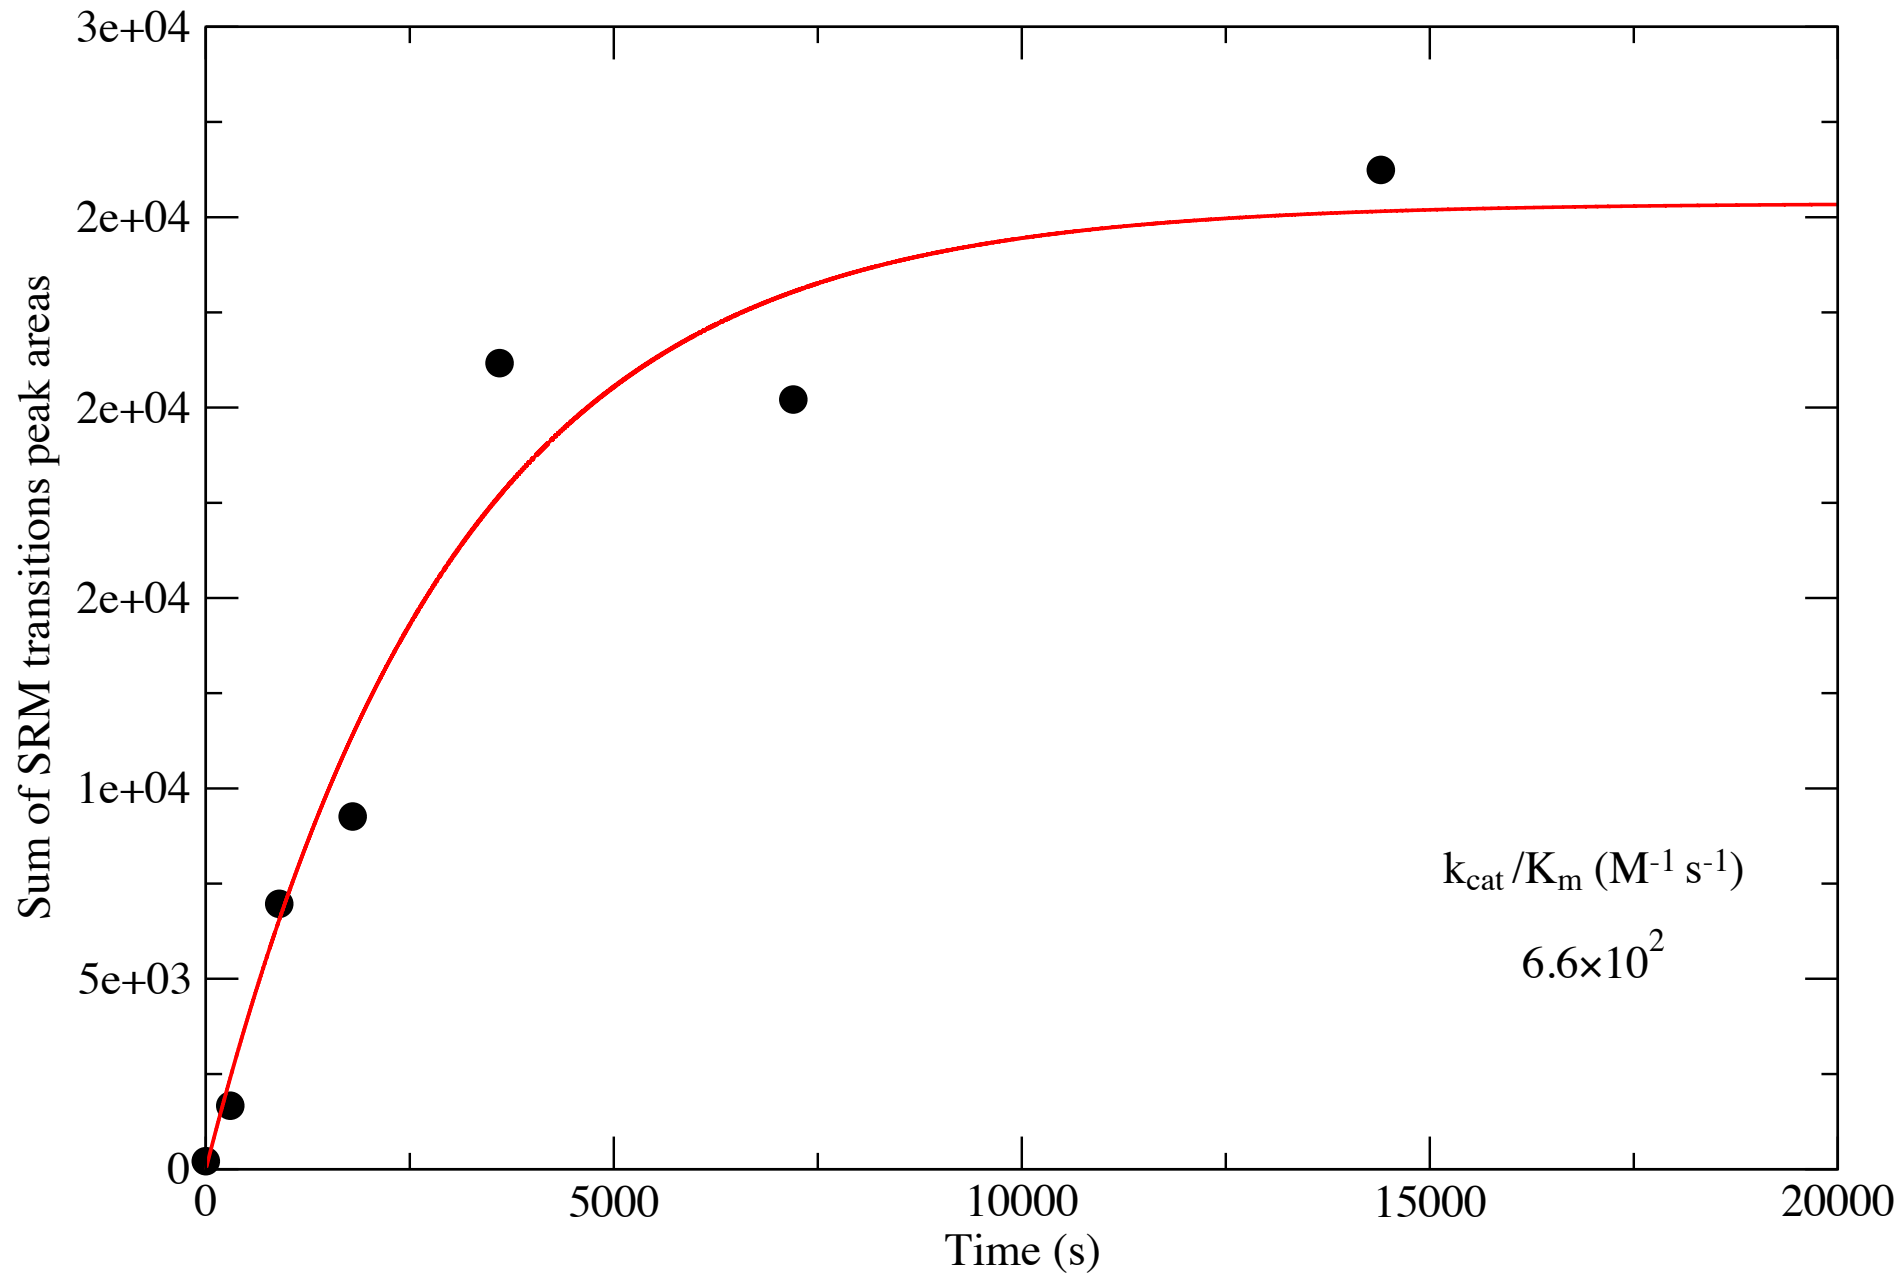

# RBM26\_HUMAN (GYNPEAPSITNTSRPMYR)

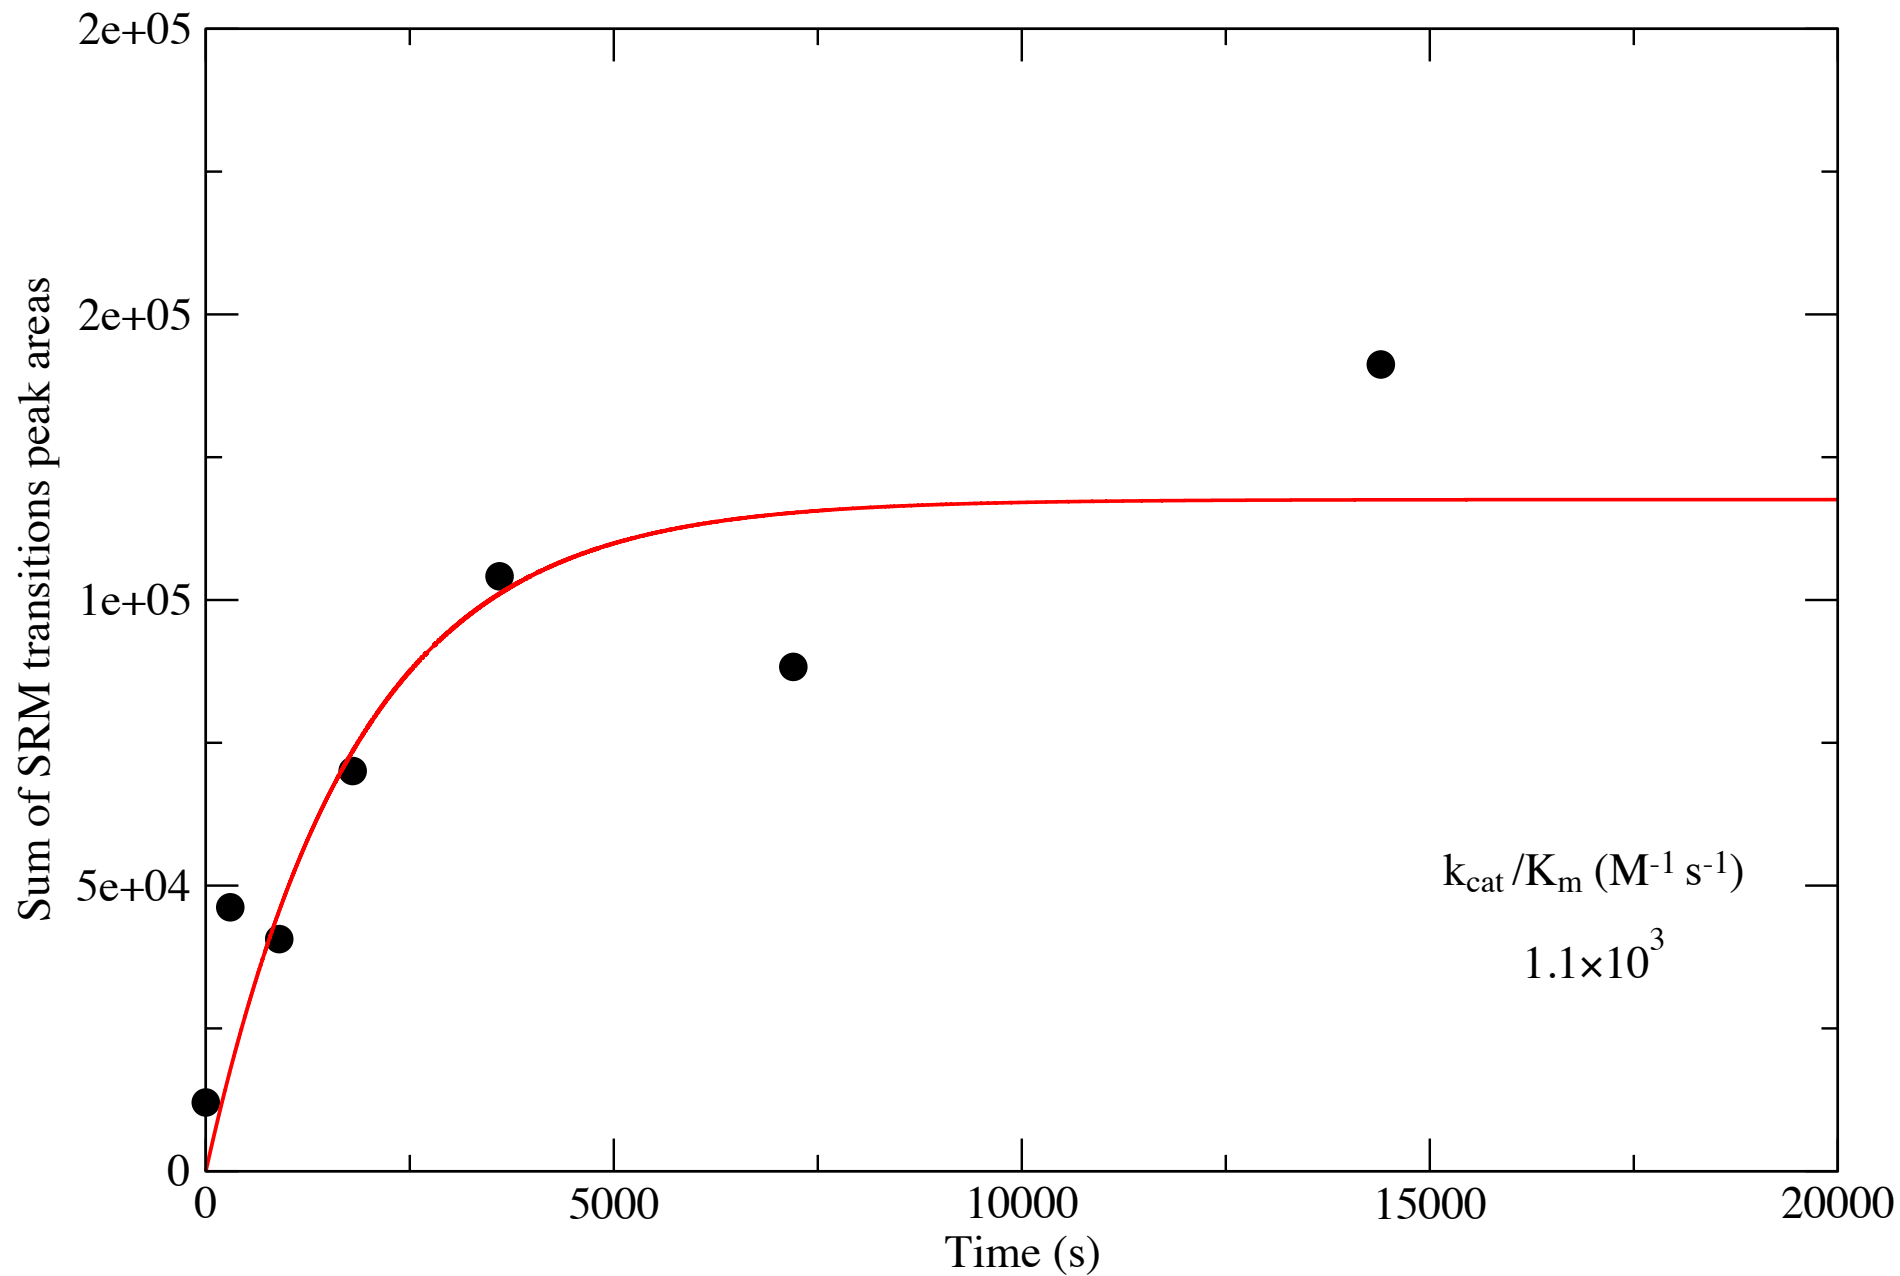

# RBM27\_HUMAN (GYNPEAPSITSSGR)

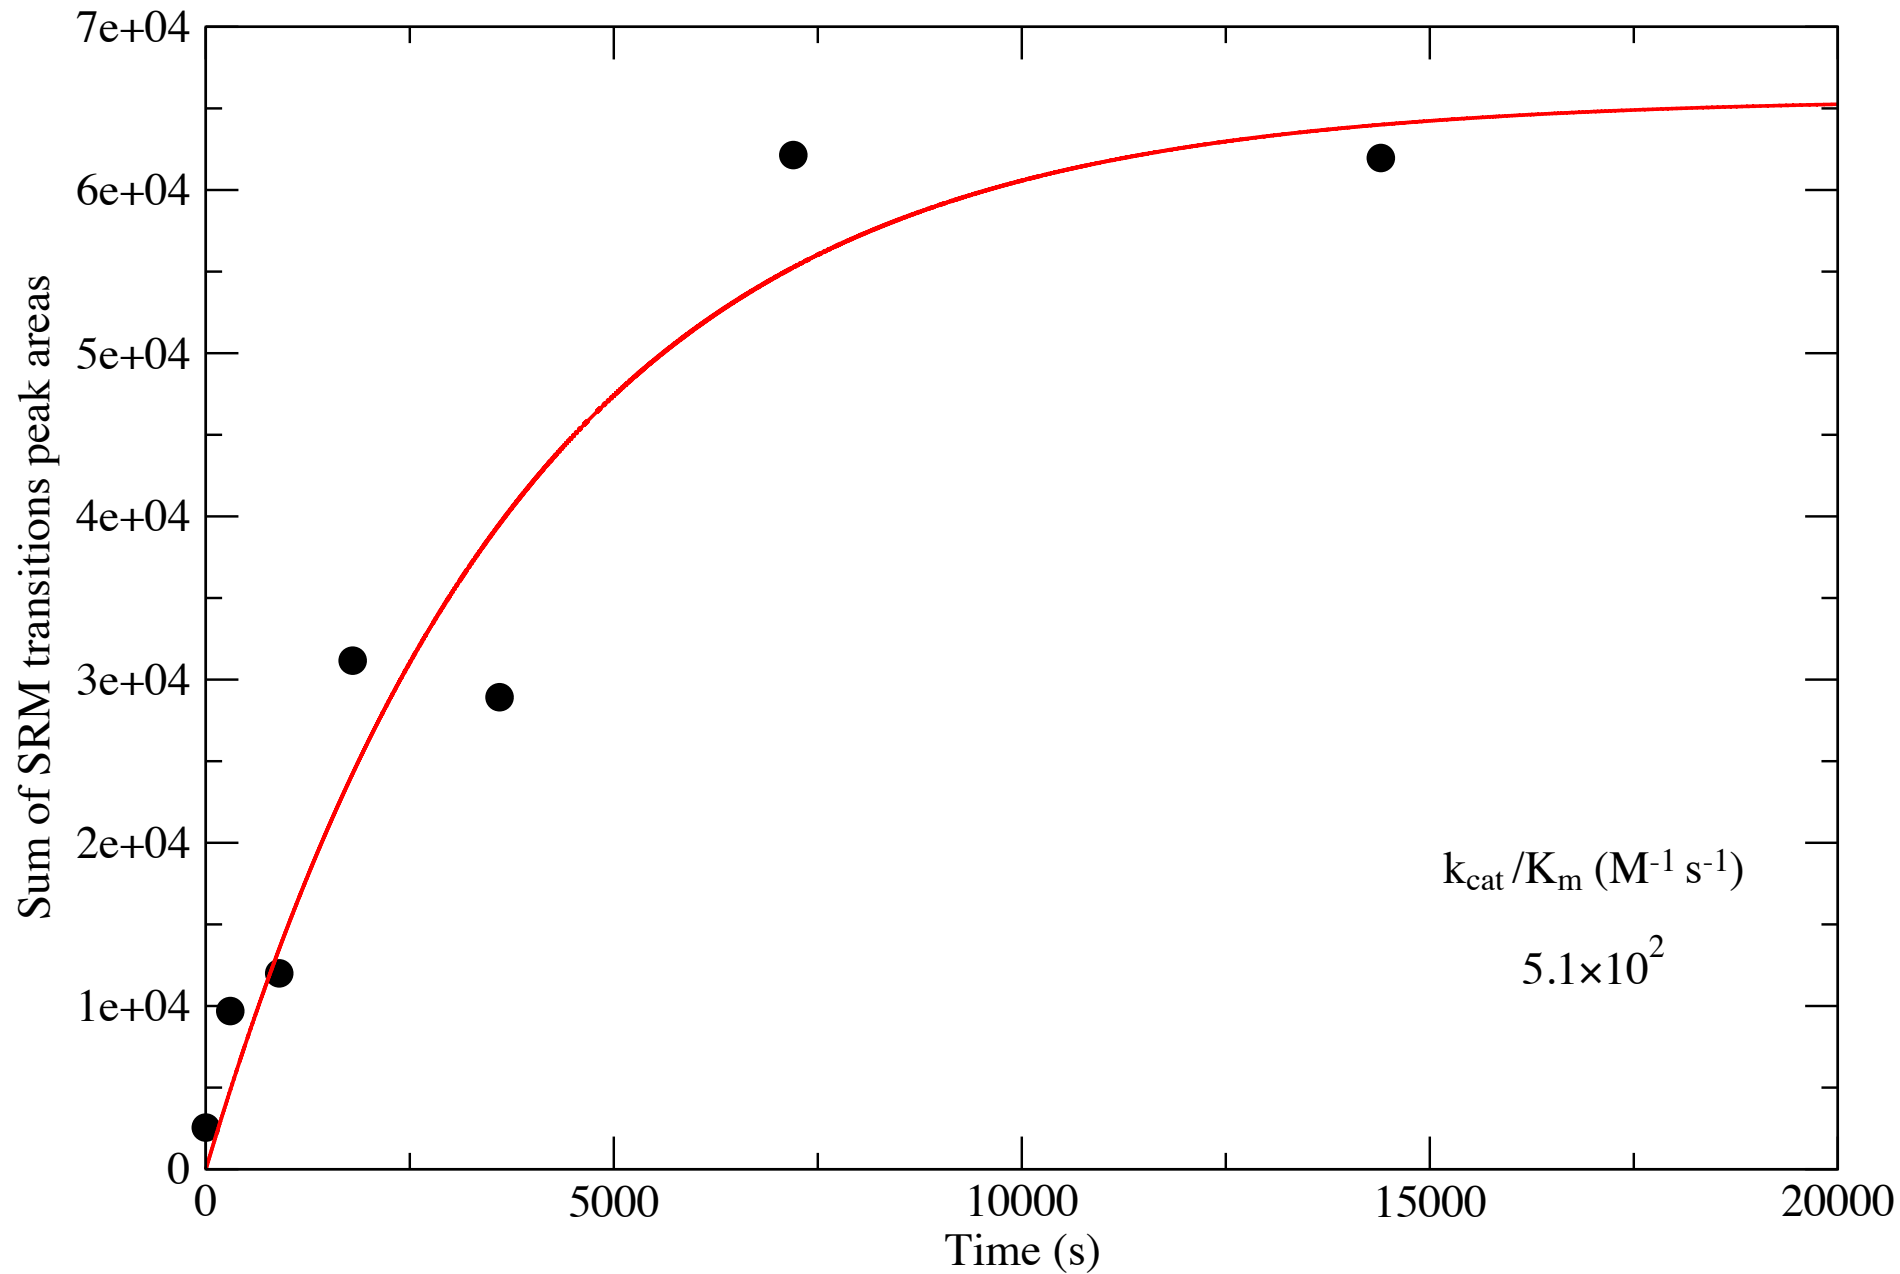

# RBP2\_HUMAN (SVYTTGGTEVMVPSFCK)

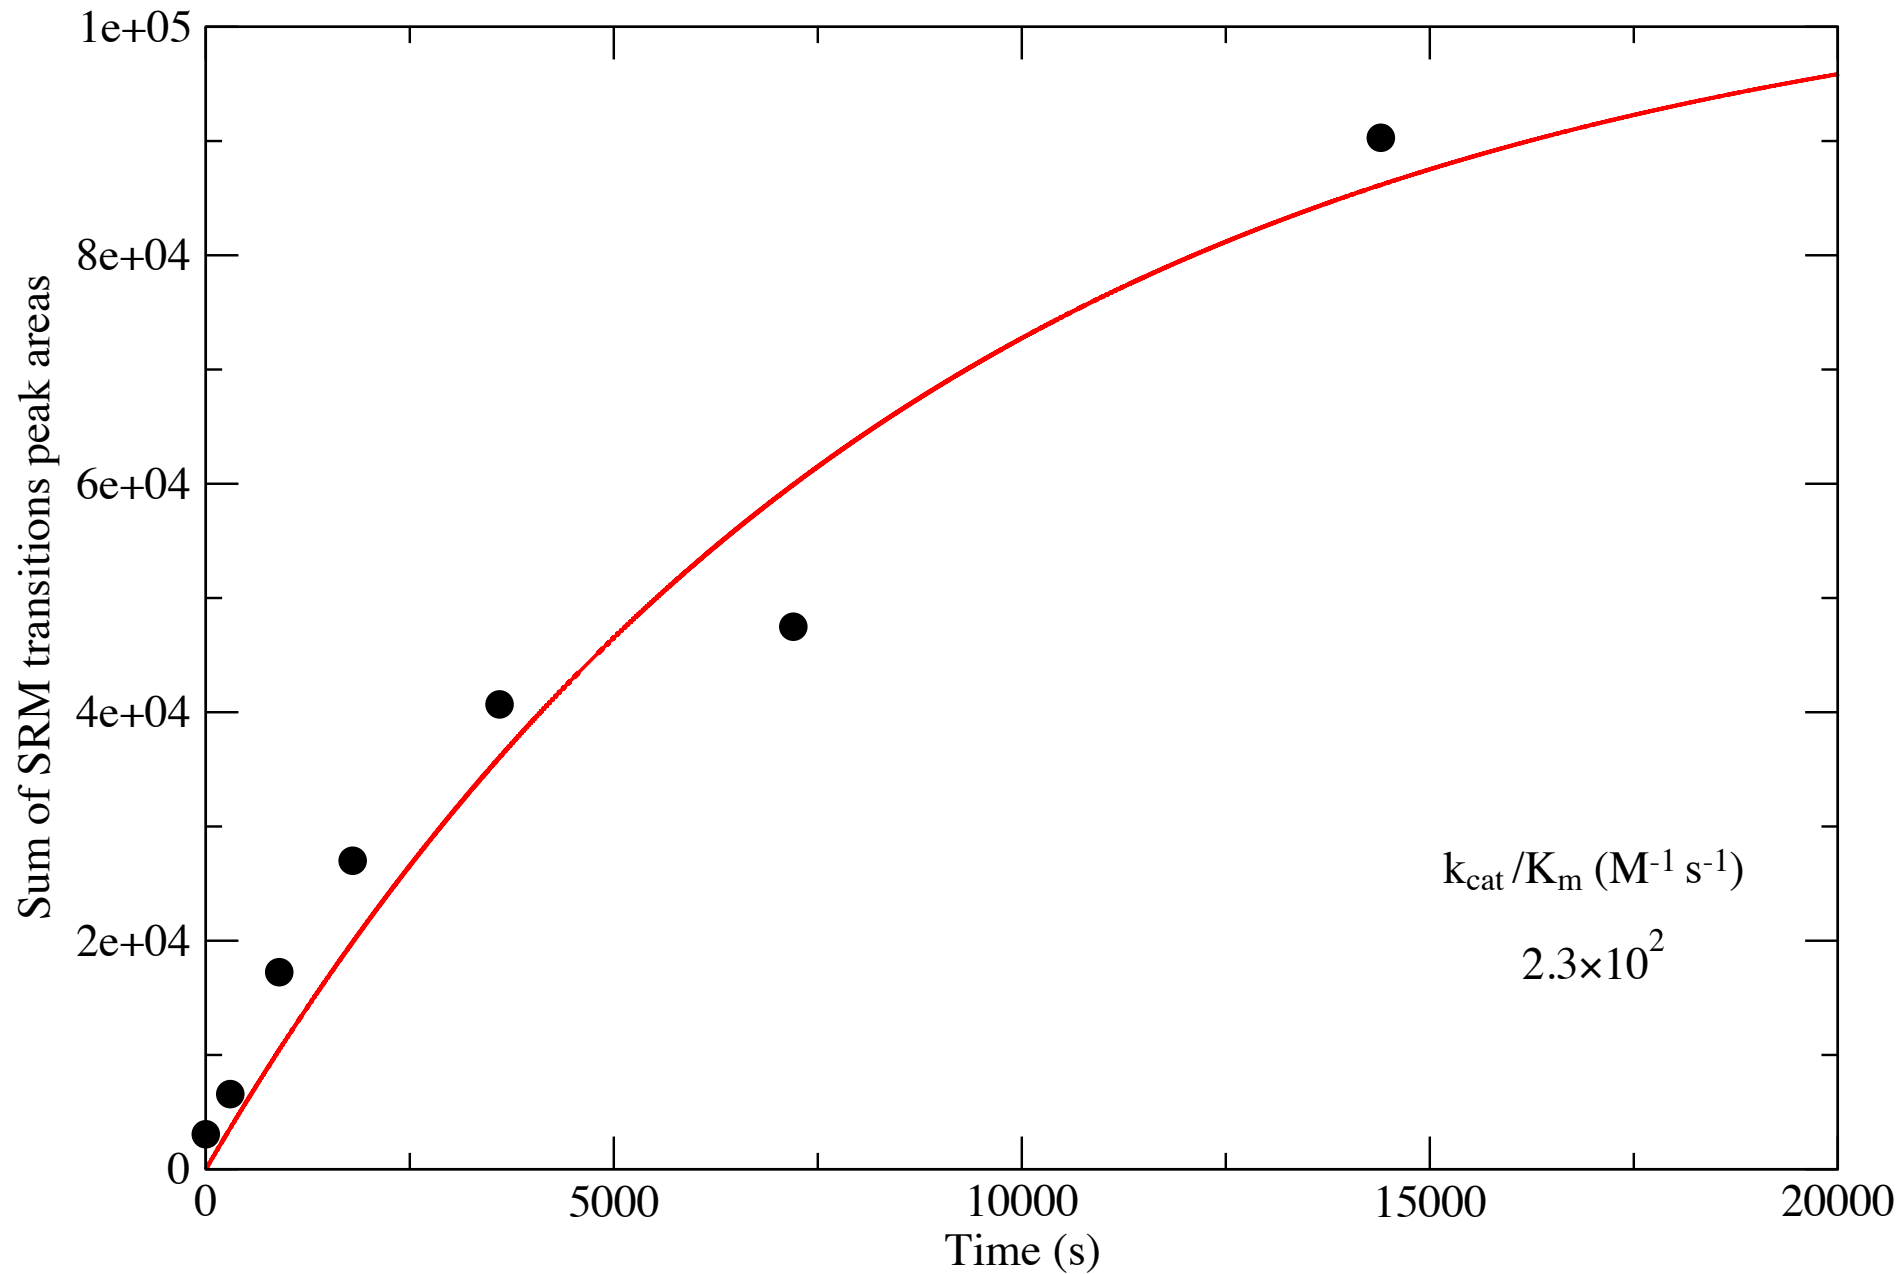

# RB\_HUMAN (SIDSFETQR)

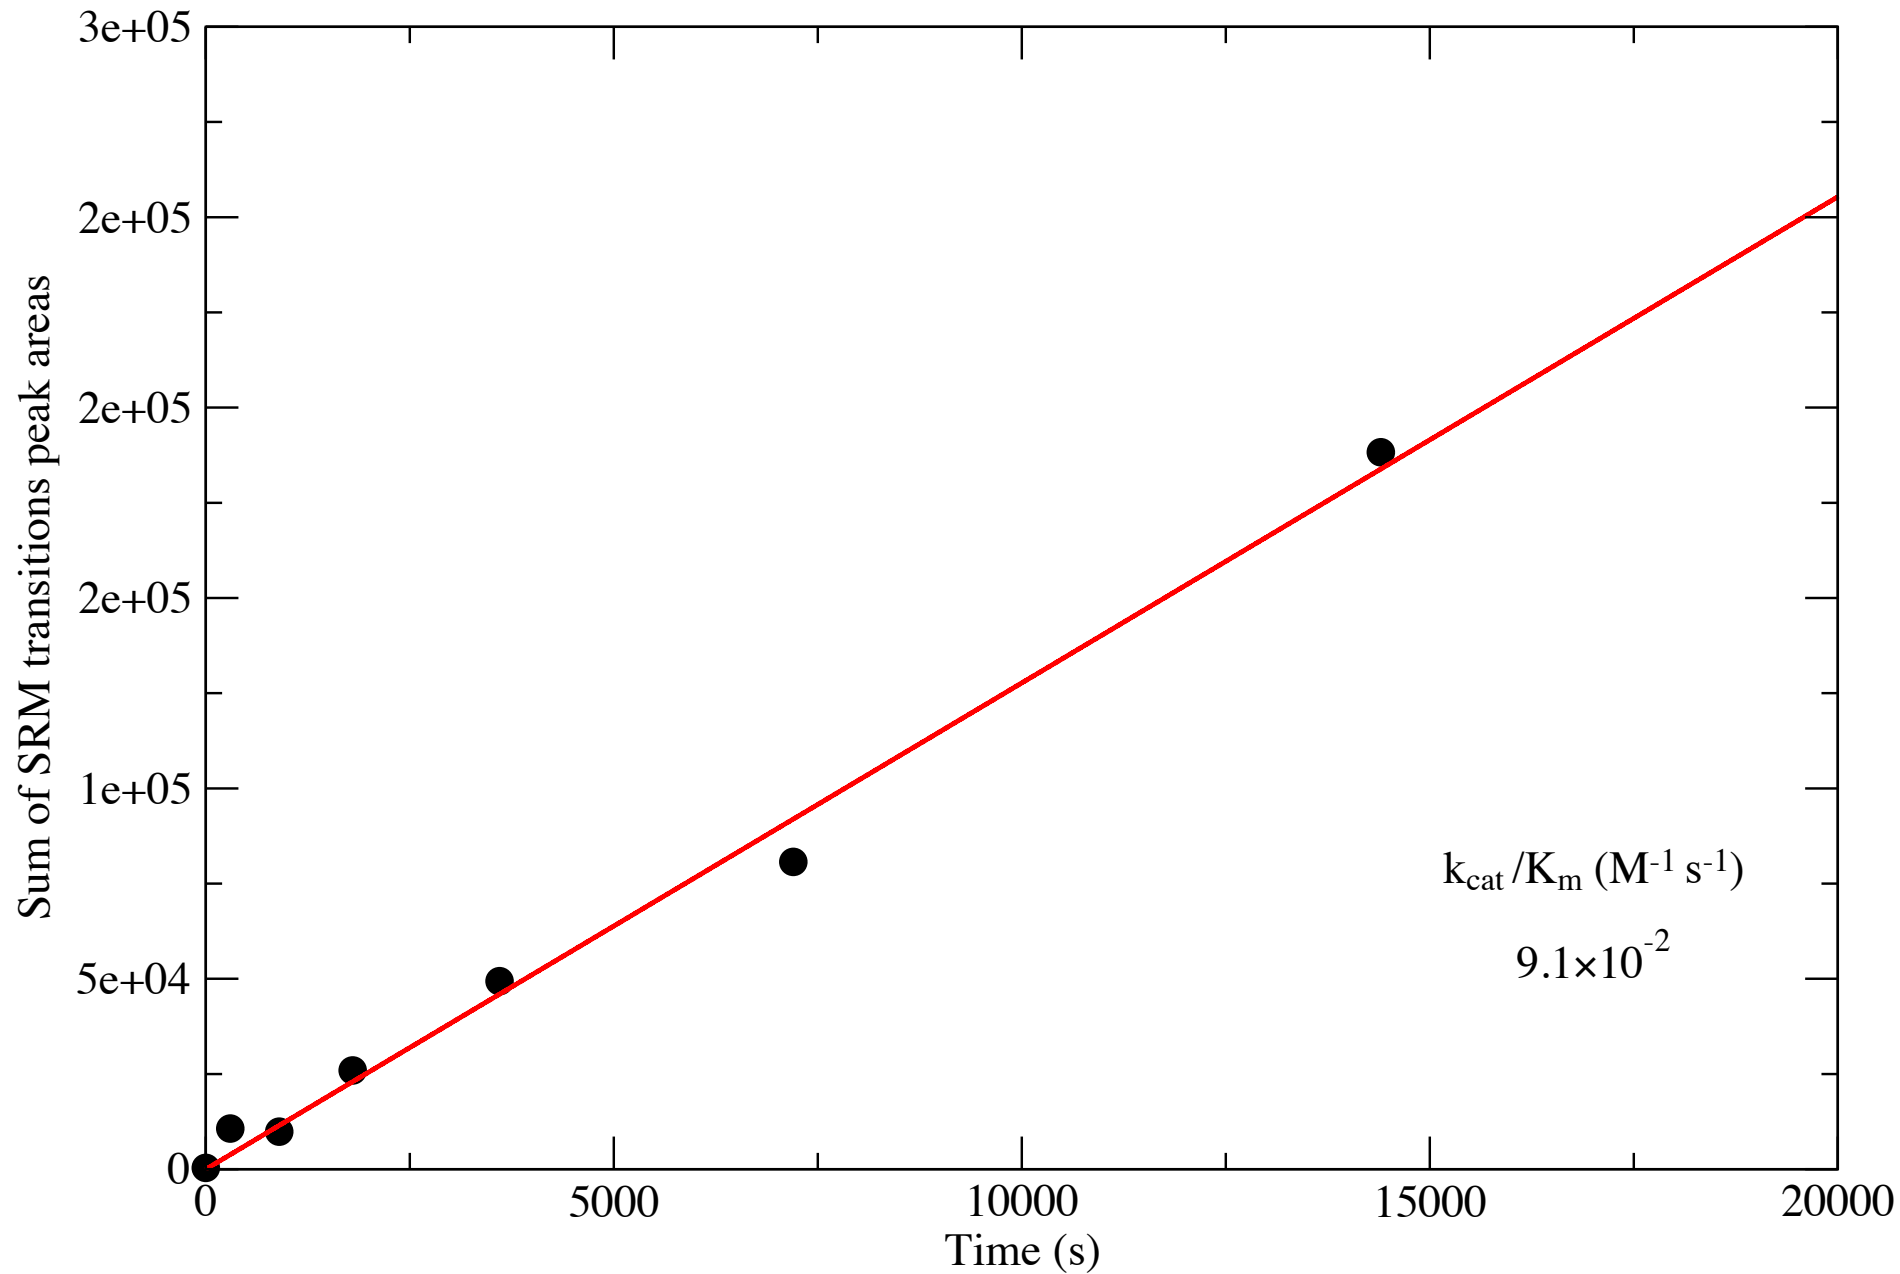

# REPS1\_HUMAN (GYSSSDSFTSDPEQIGSNVTR)

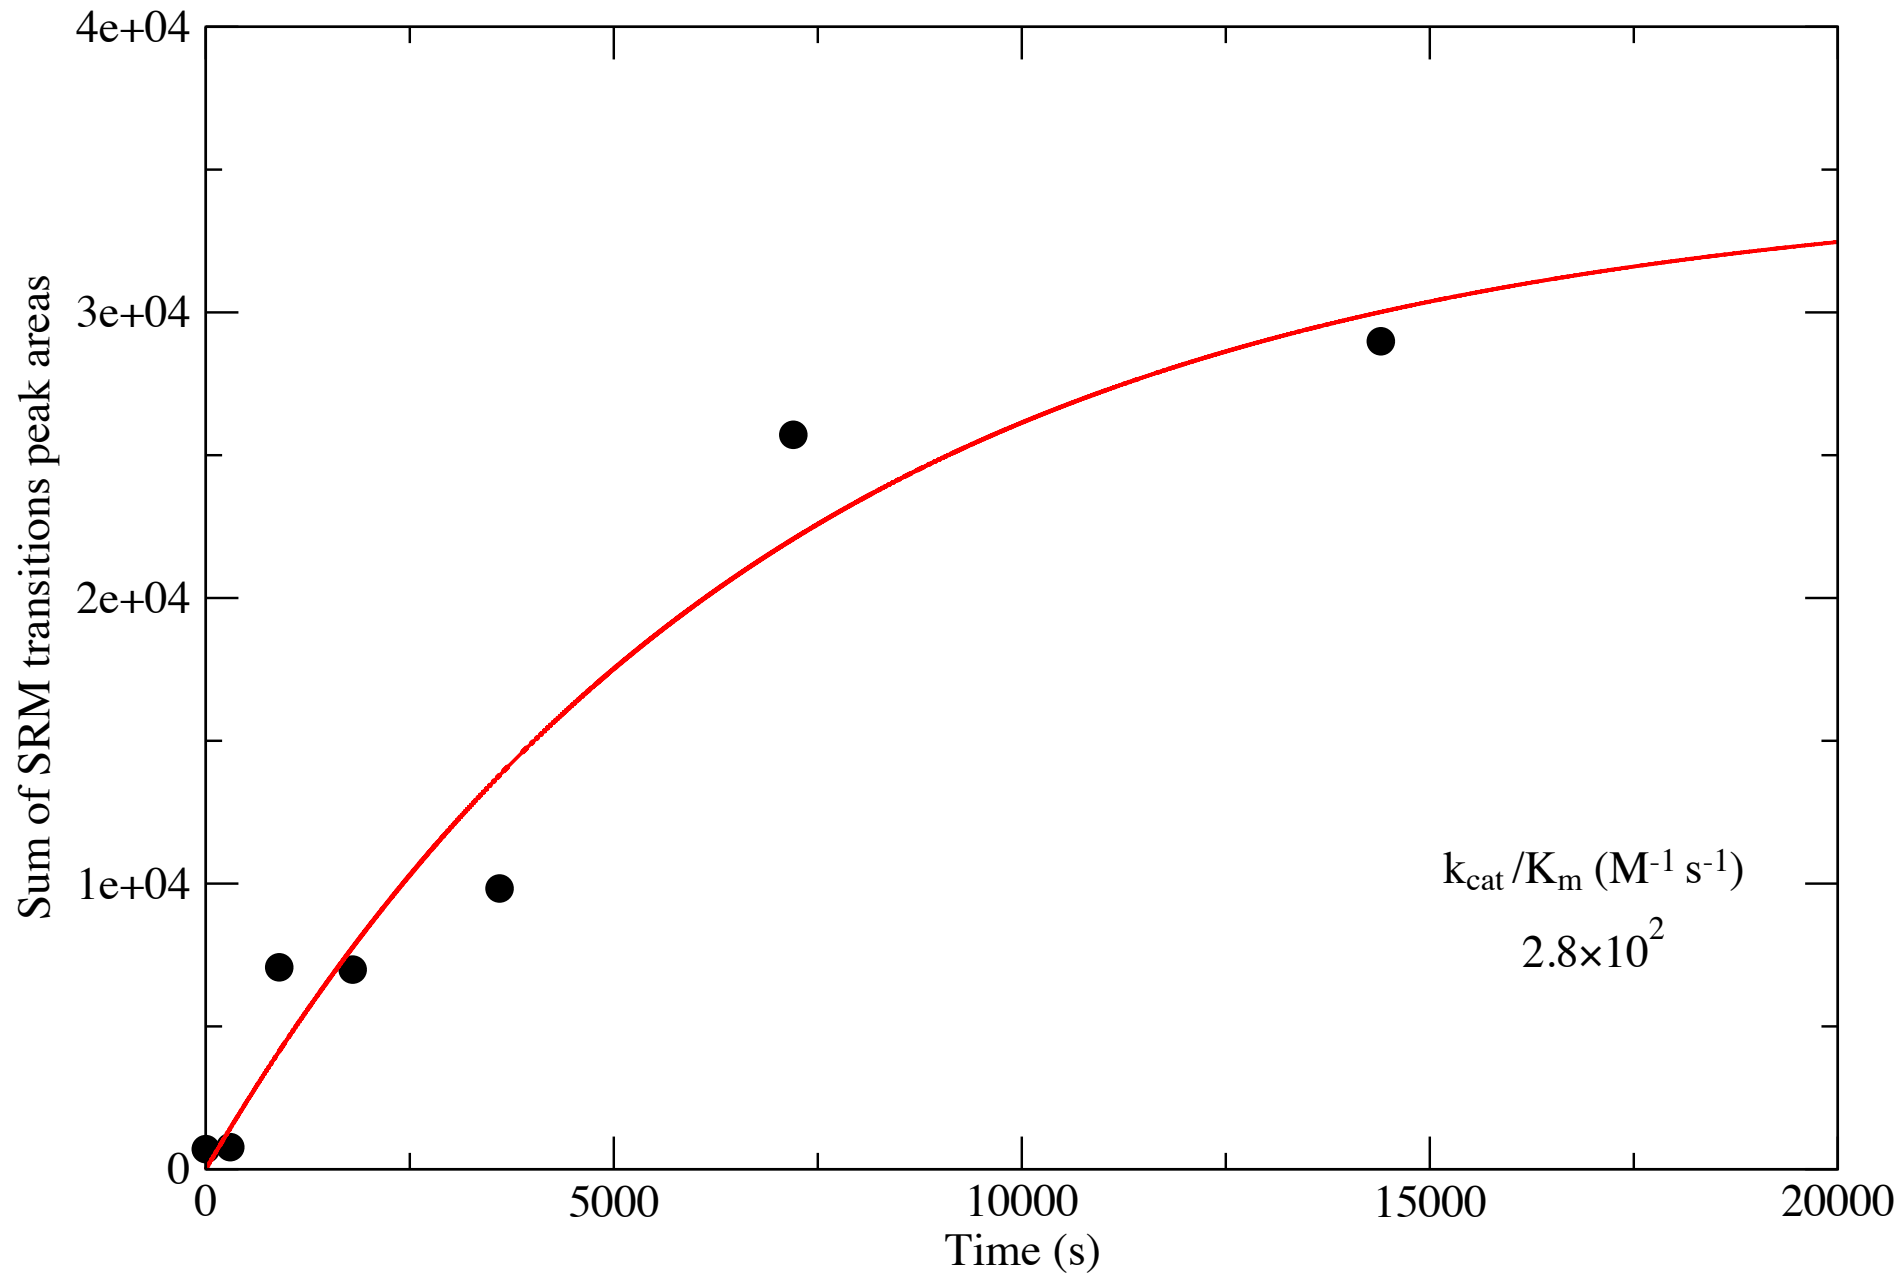

# REPS1\_HUMAN (SNIAPADPDTAIVHPVPIR)

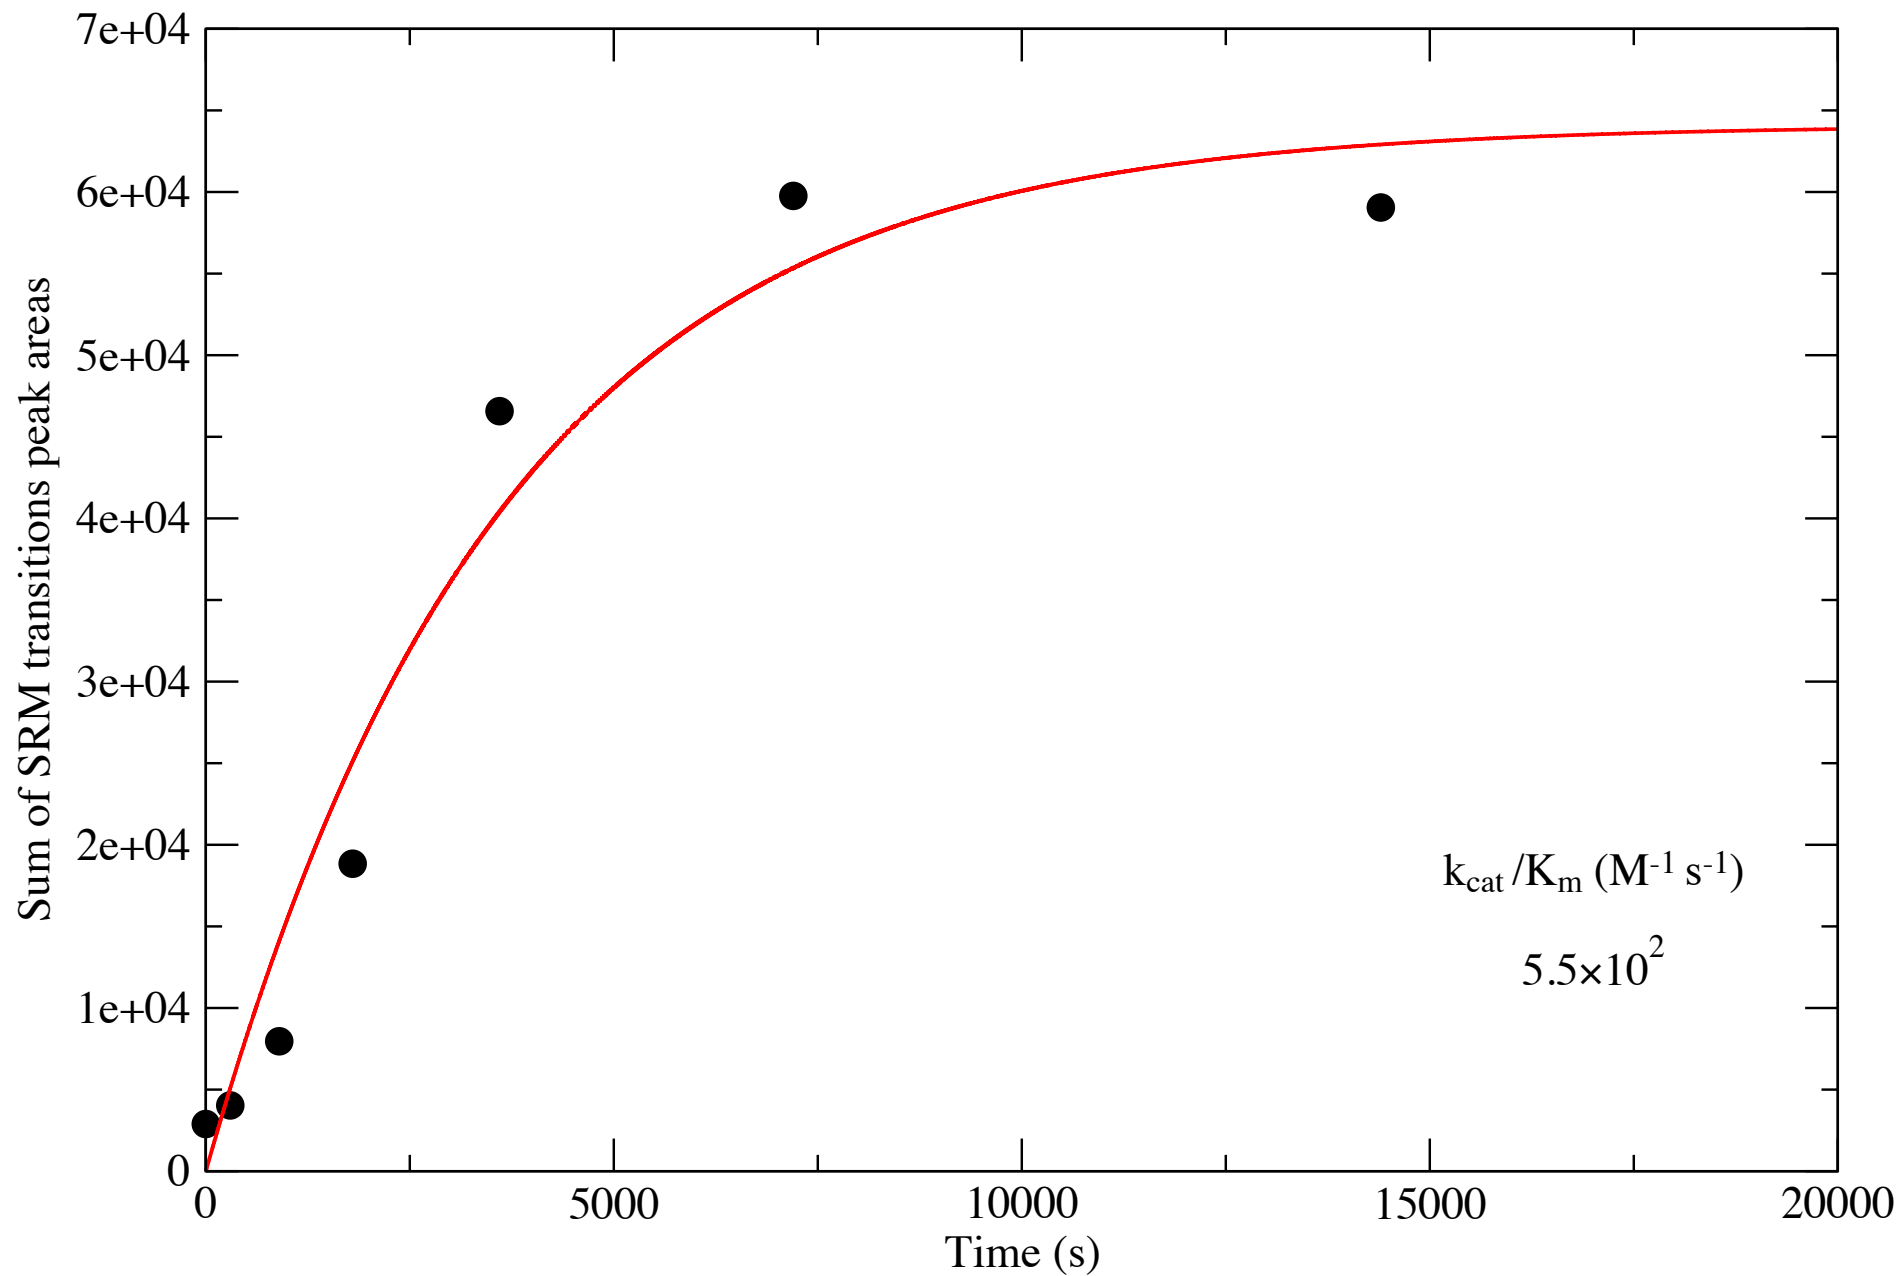

# REQU\_HUMAN (GSSLEALLR)

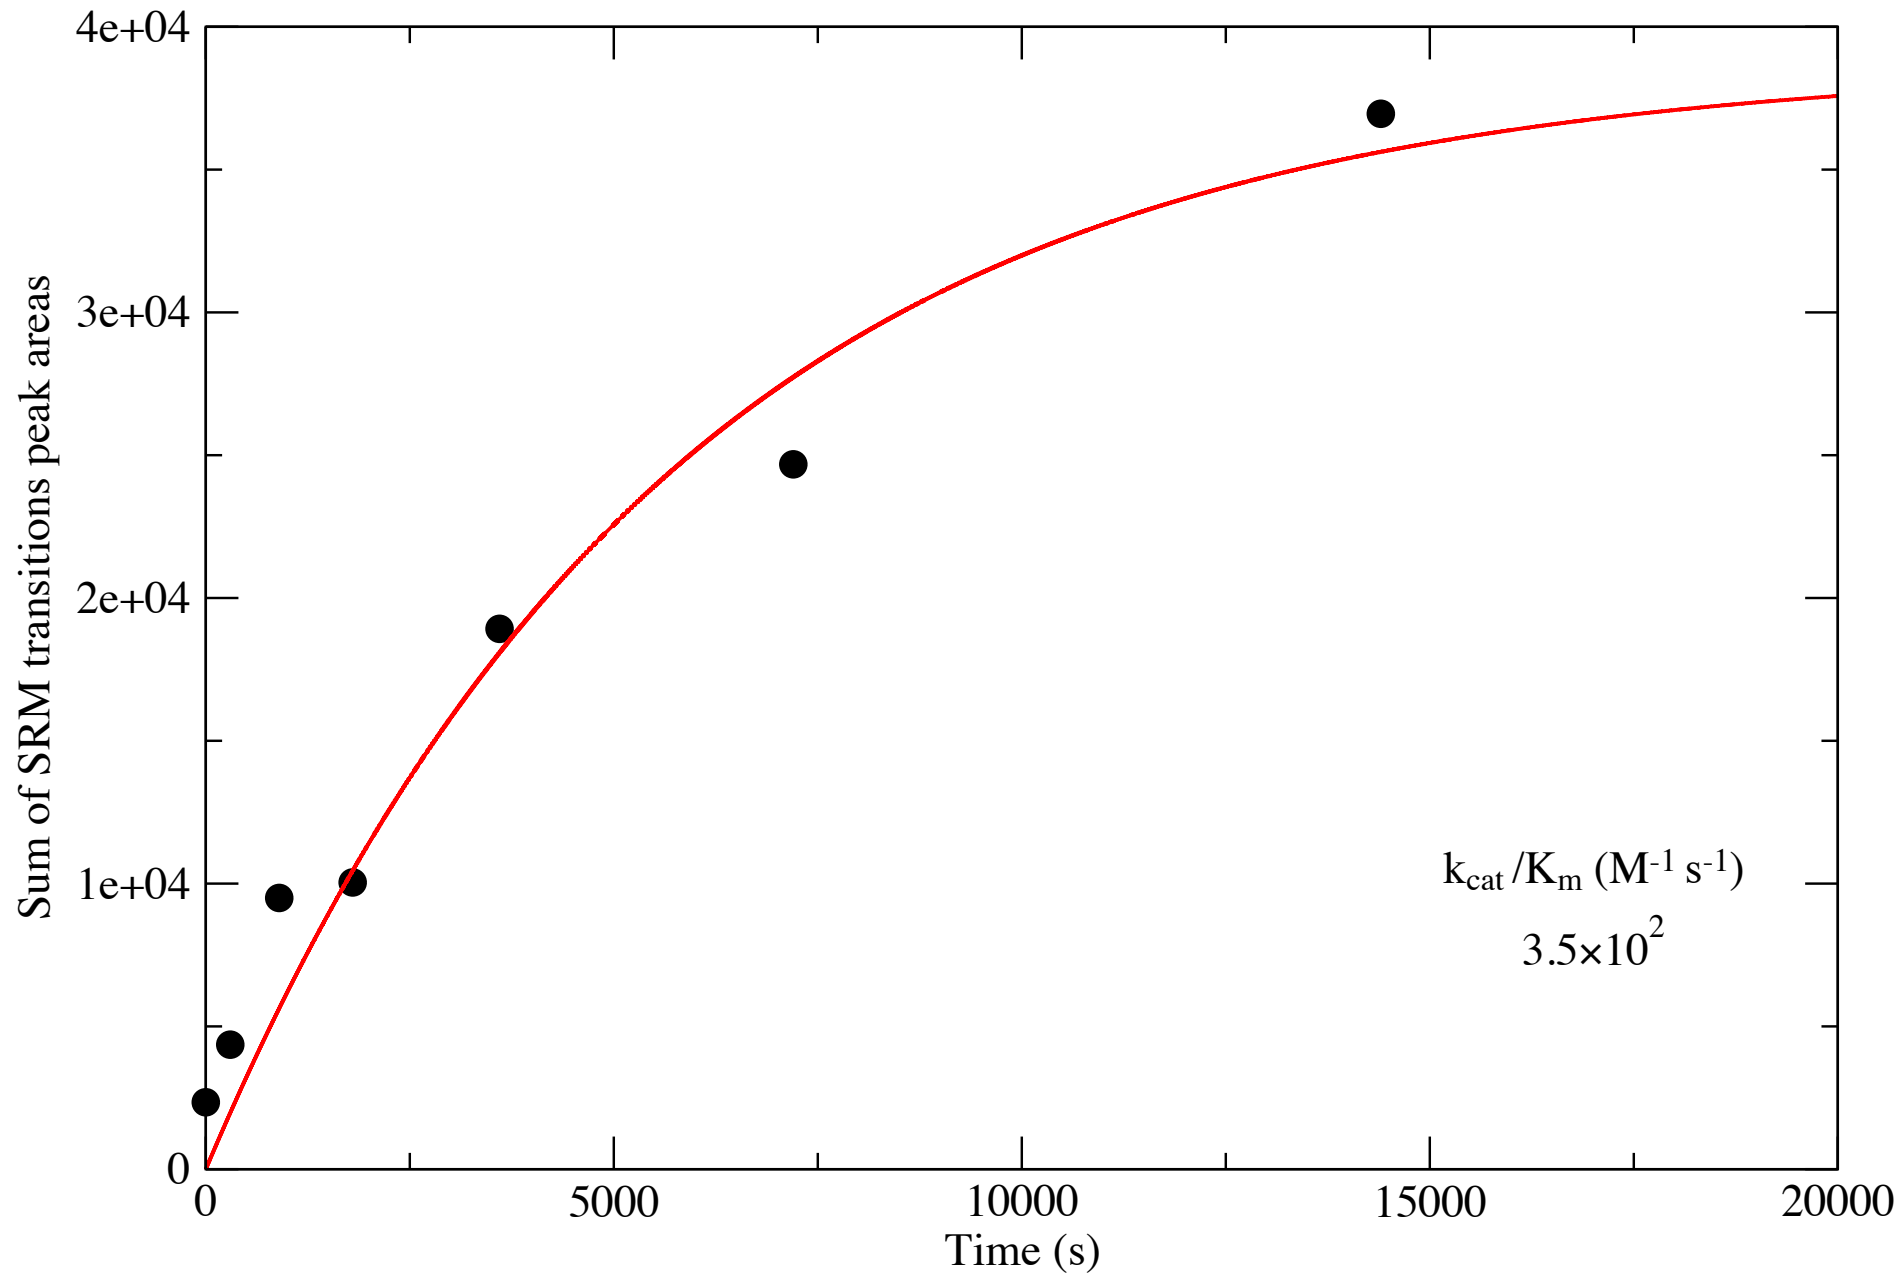



# RFA1\_HUMAN (GVSISDLK)

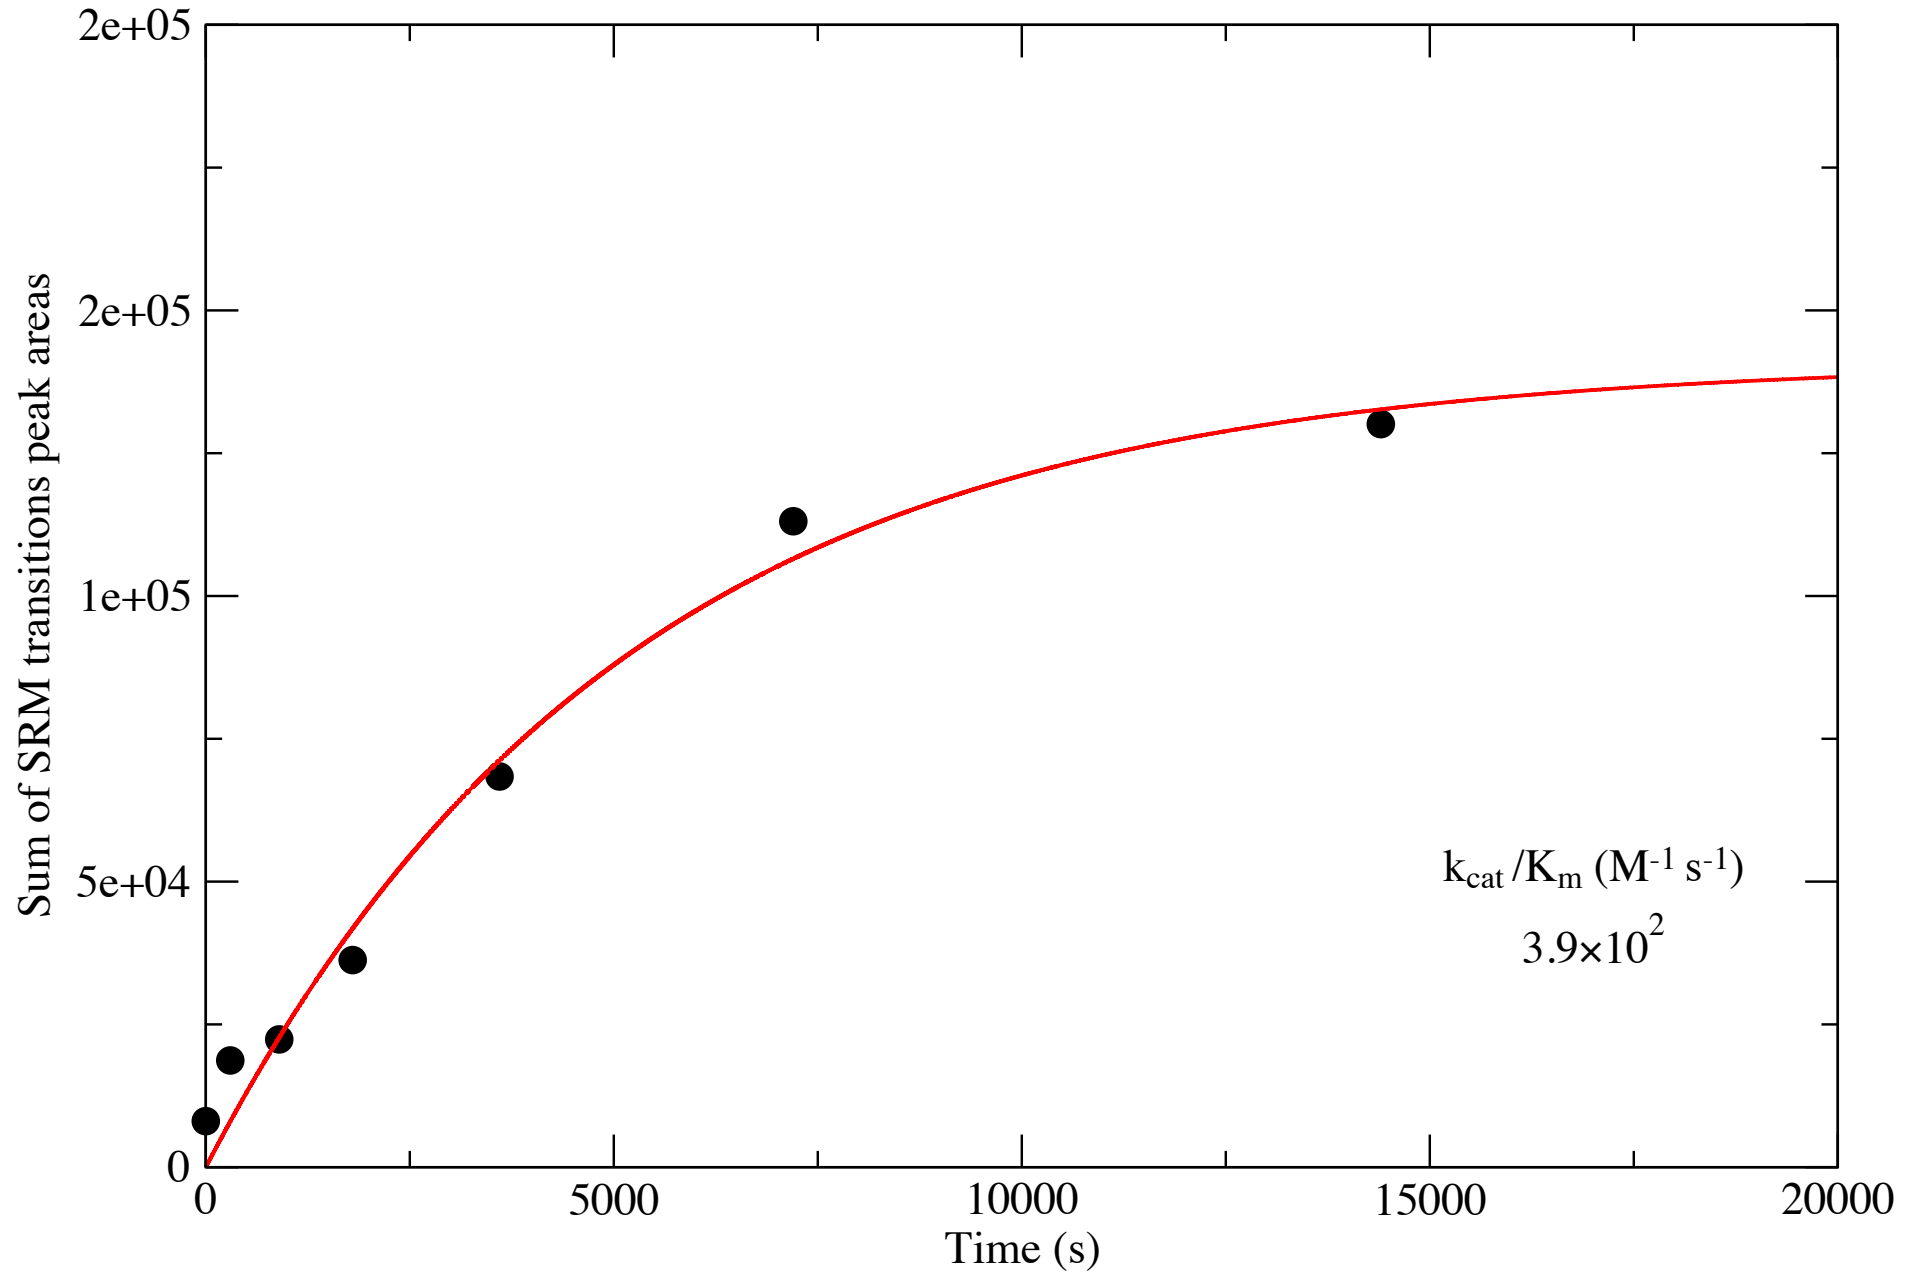

# RGAP1\_HUMAN (SVGTPQSNGGMR)

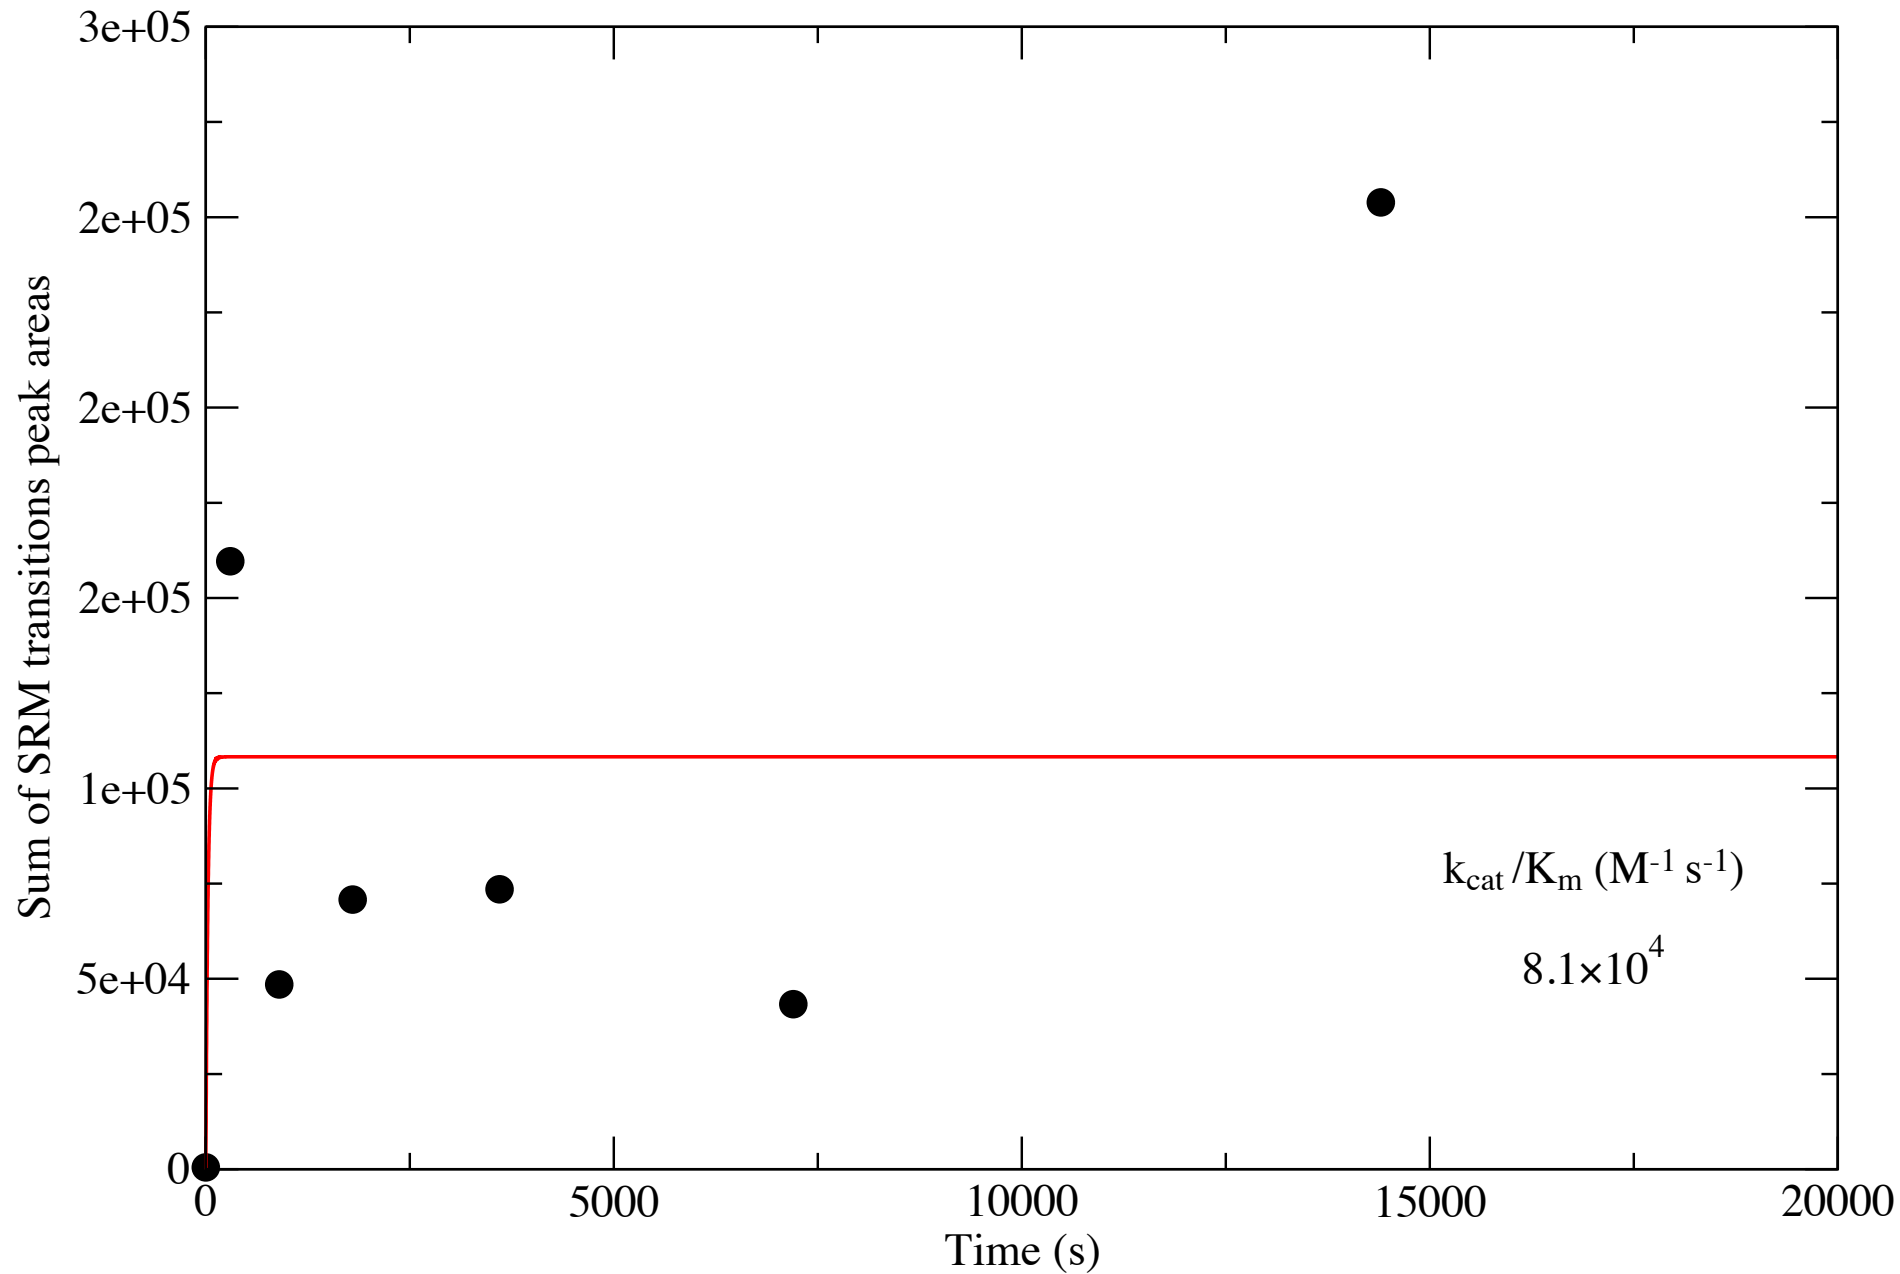

# RGCC\_HUMAN (AVLADFASPFHER)

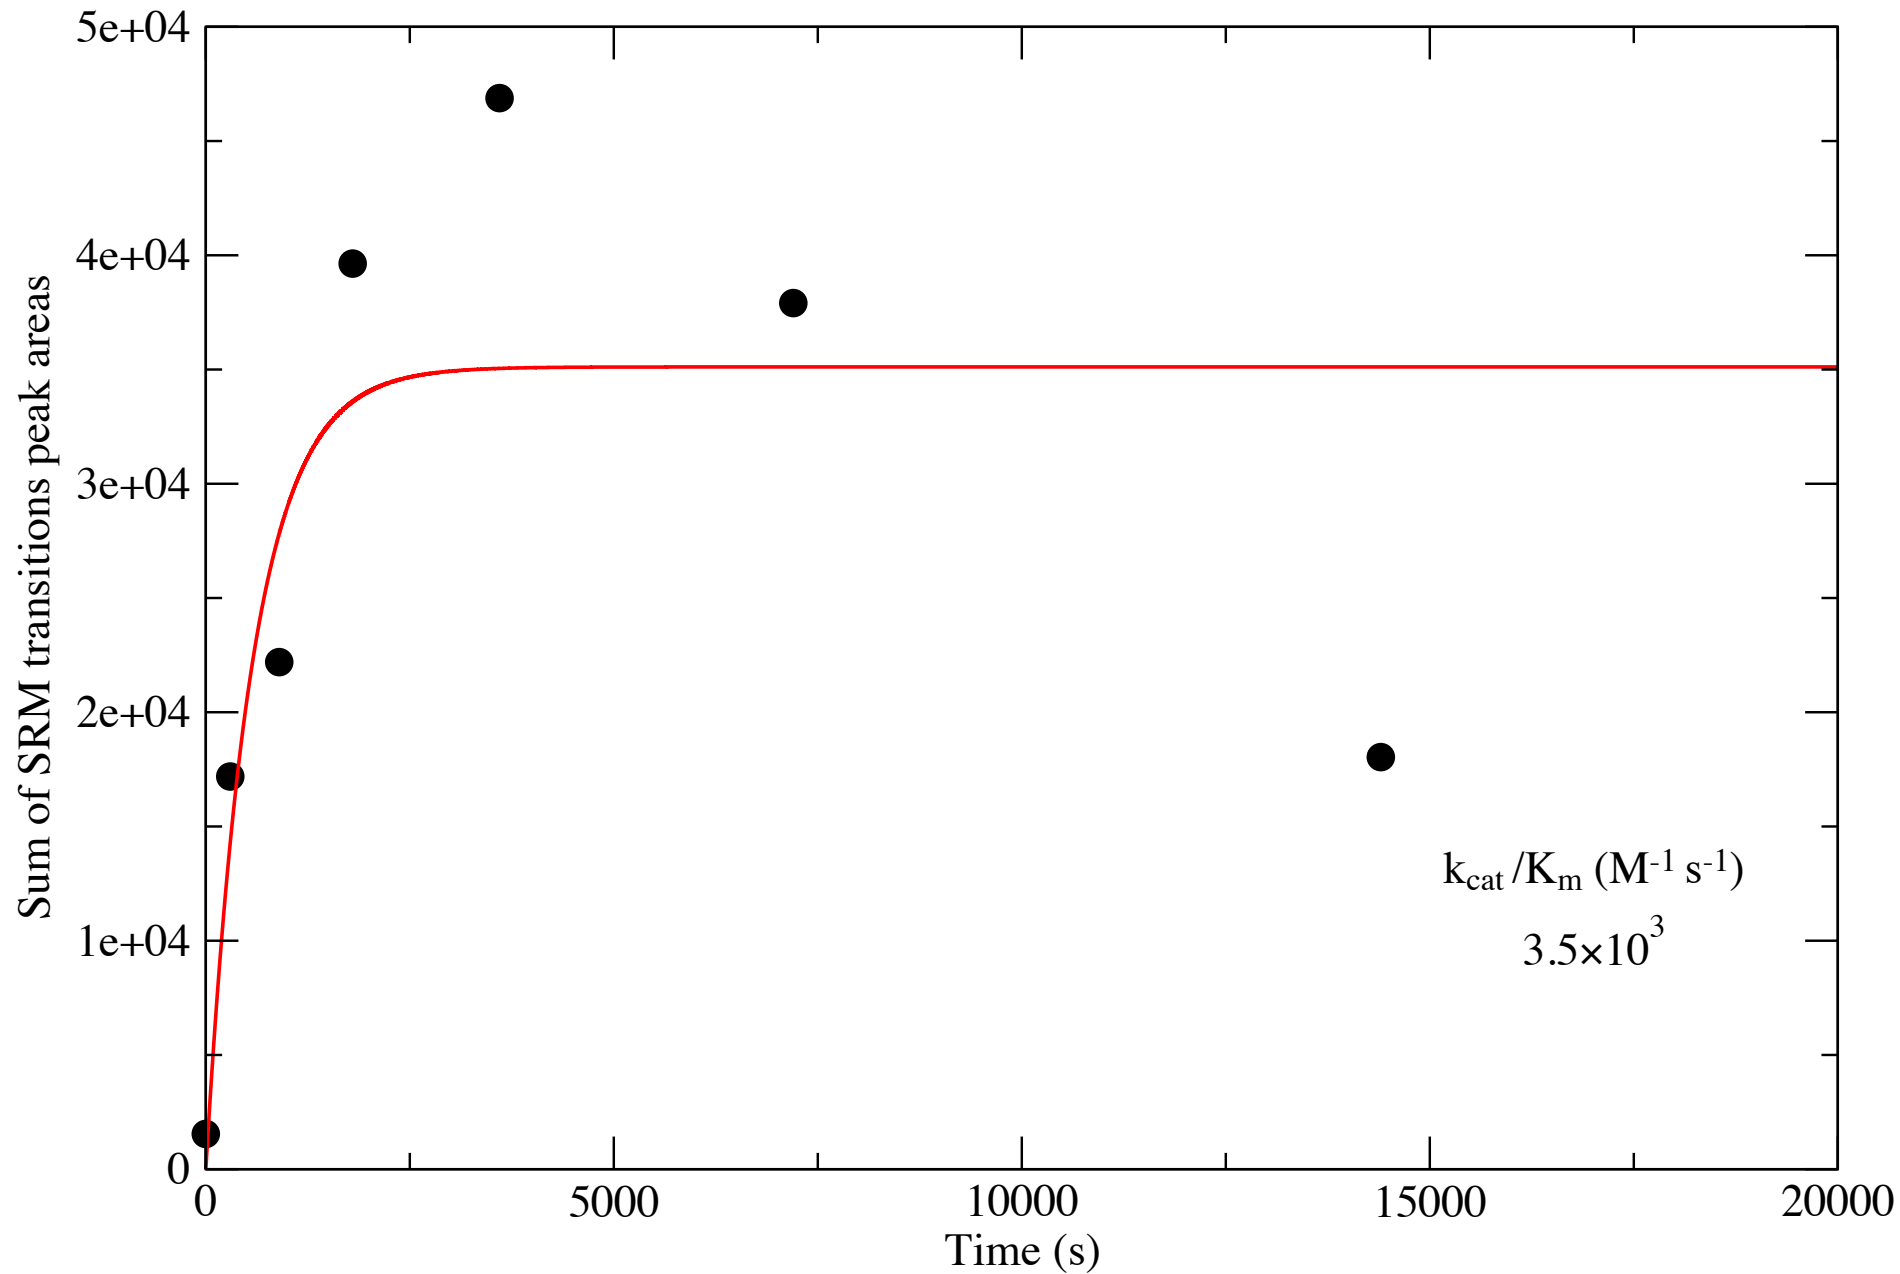

# RHG30\_HUMAN (SIEAAEGEQEPEAEALGGTNSEPGTPR)

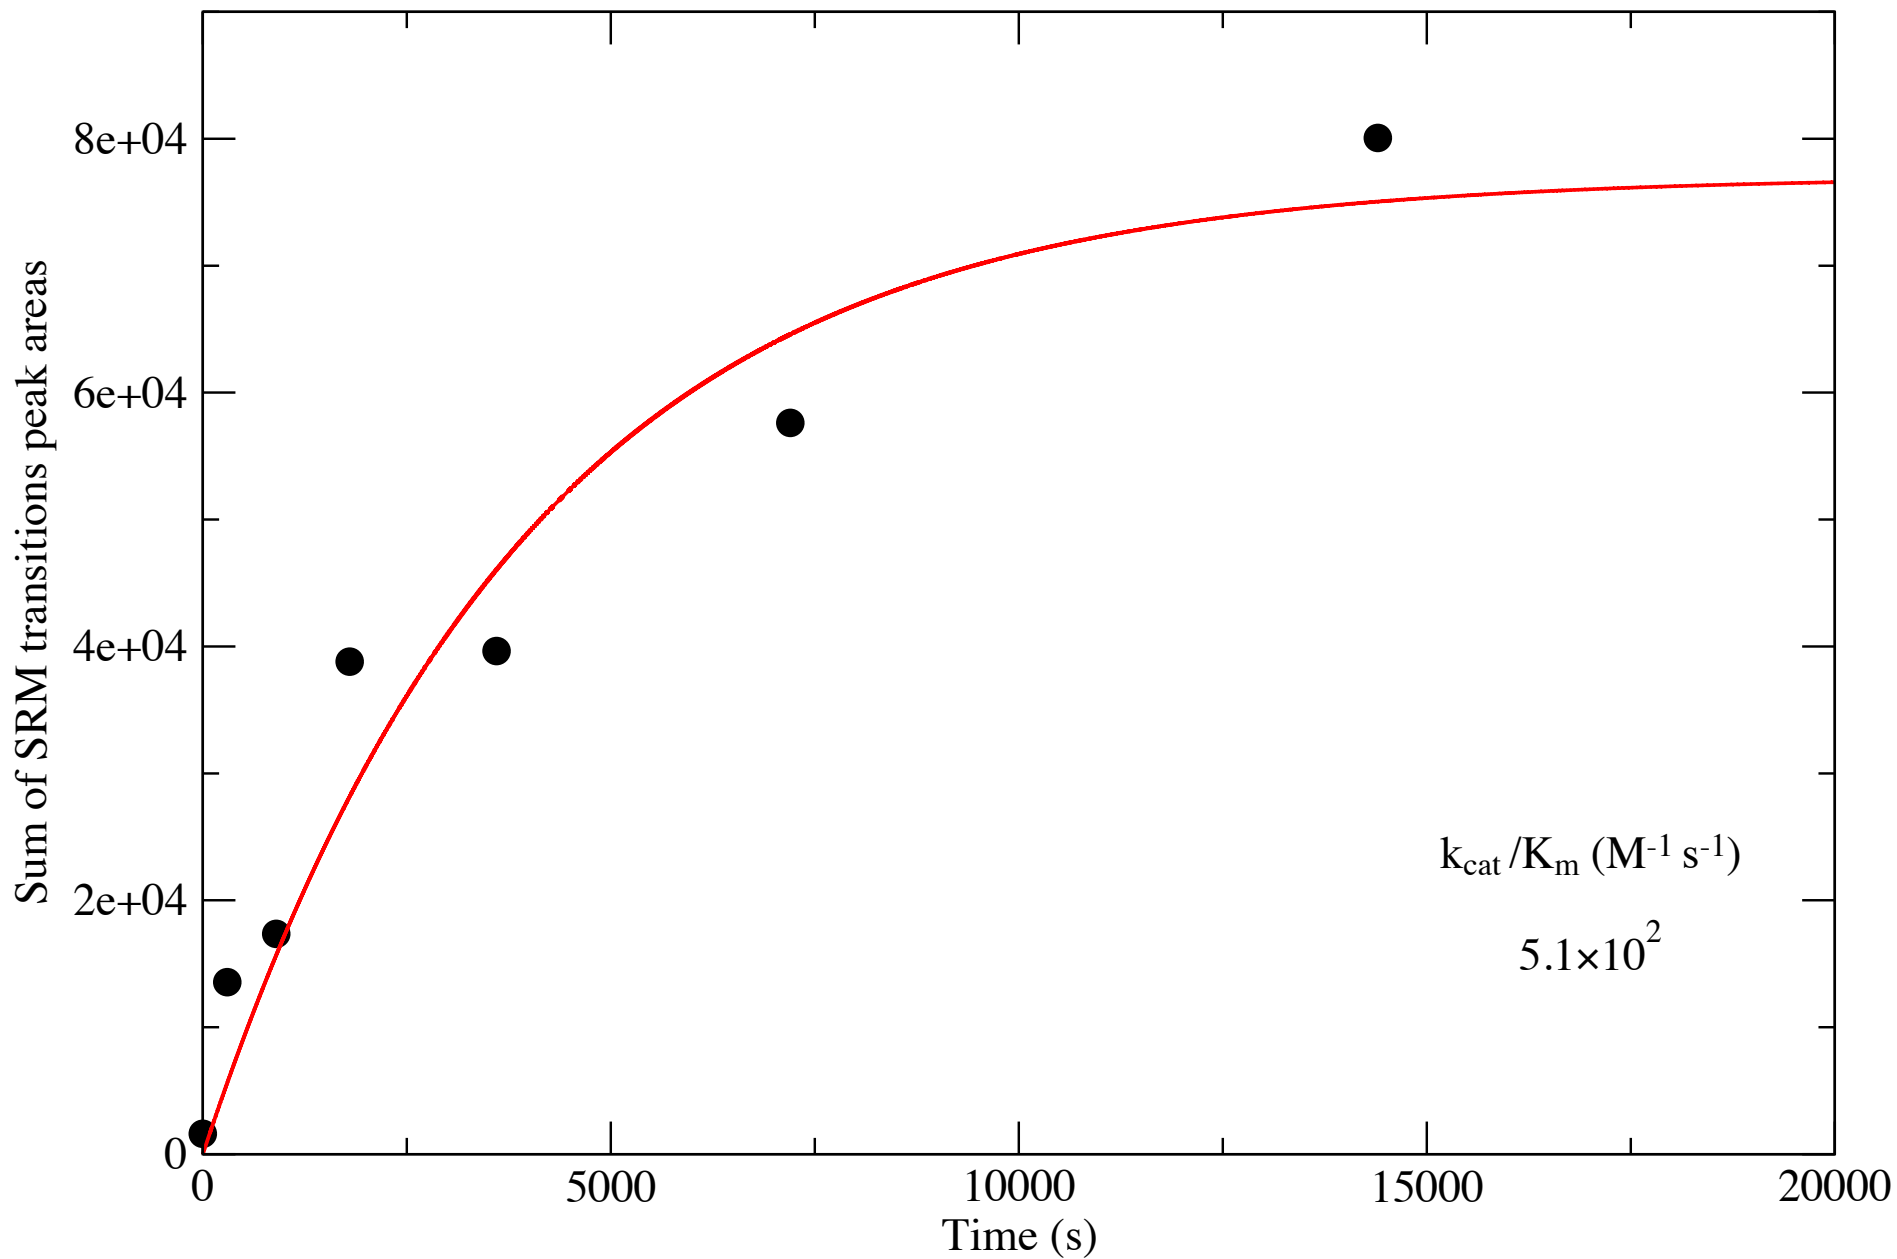

# RIF1\_HUMAN (SLIVSETK)

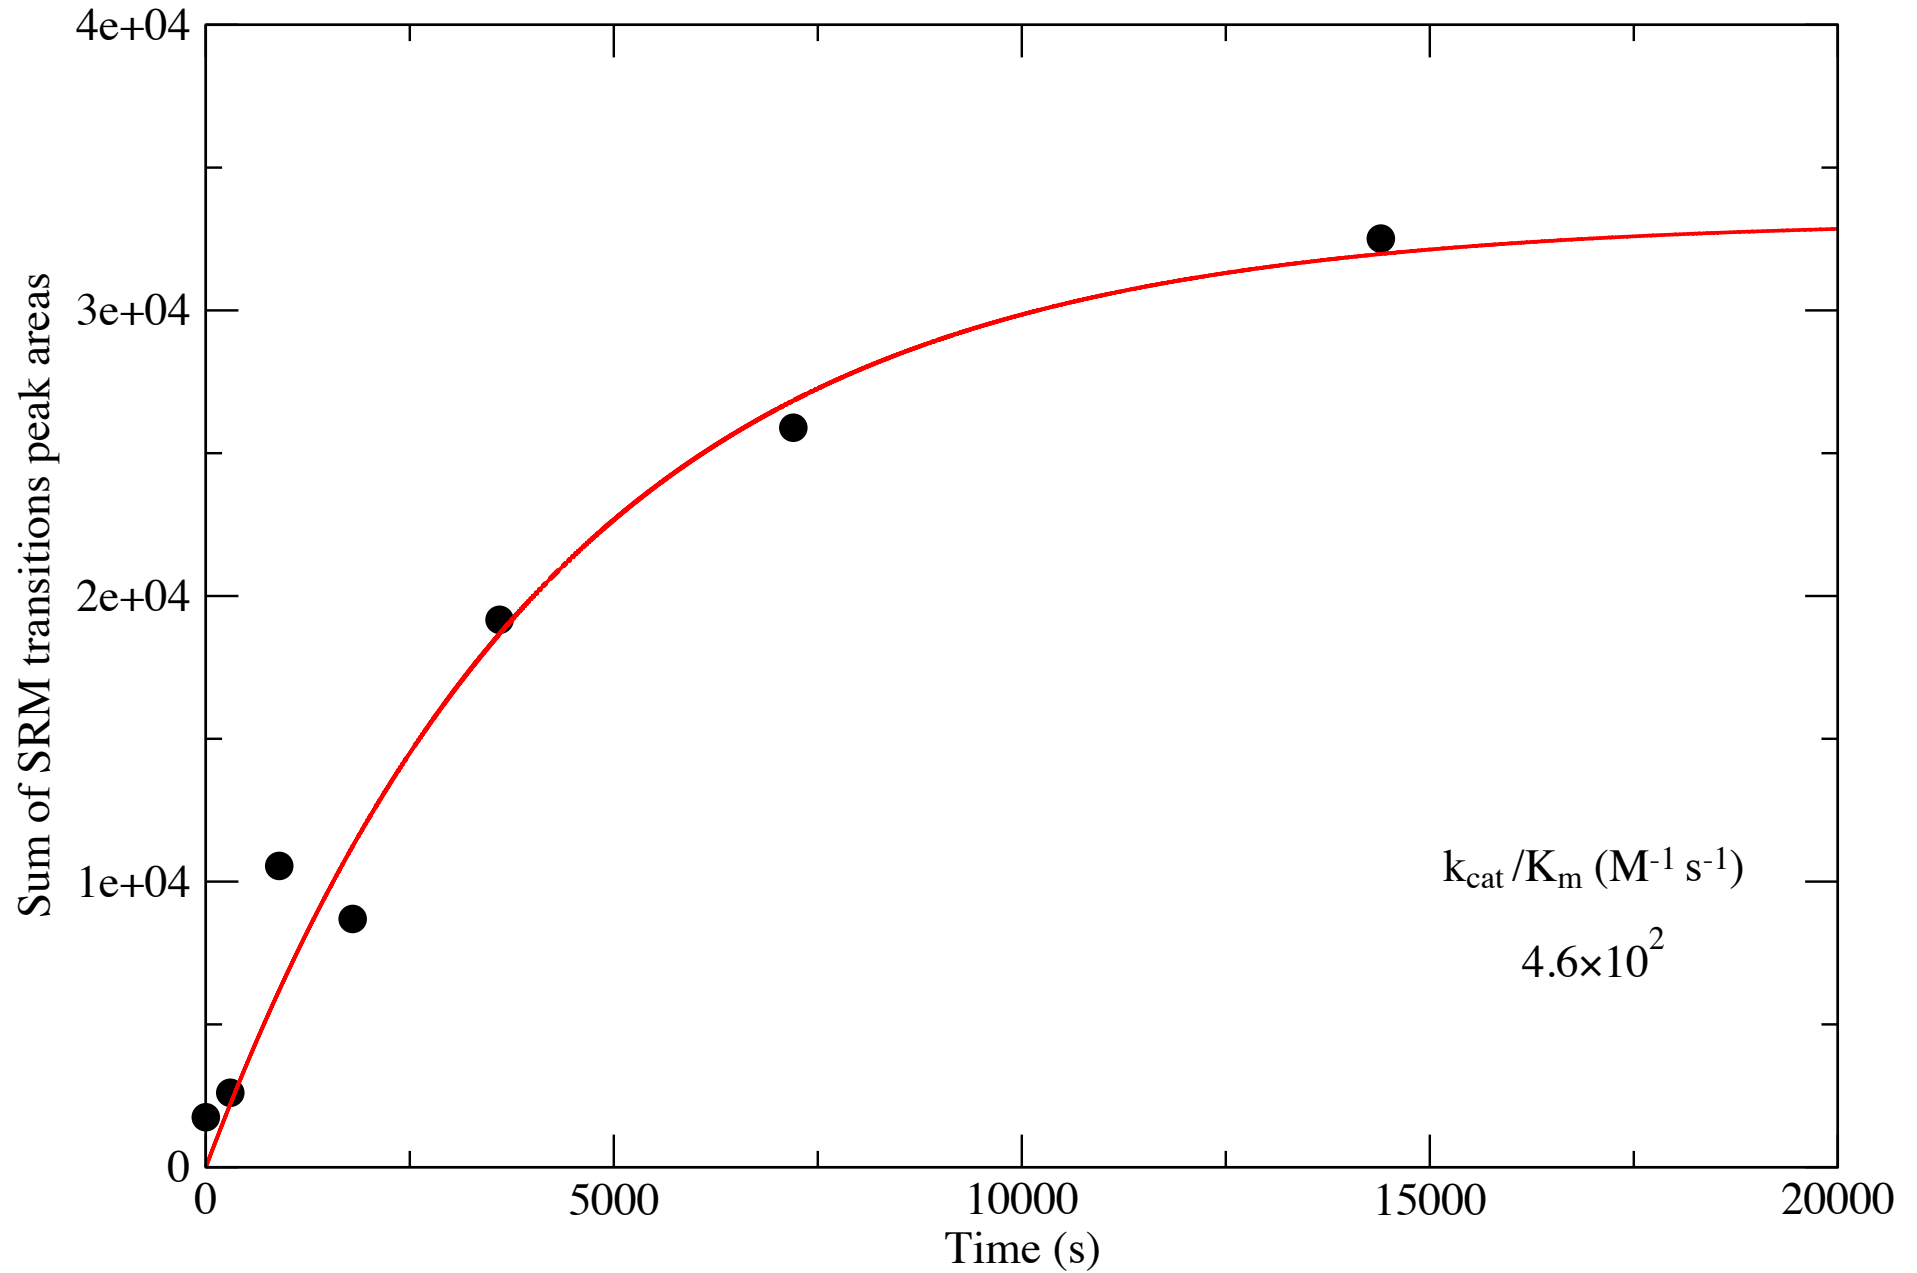

# RING1\_HUMAN (SAPDSAPGPAPK)

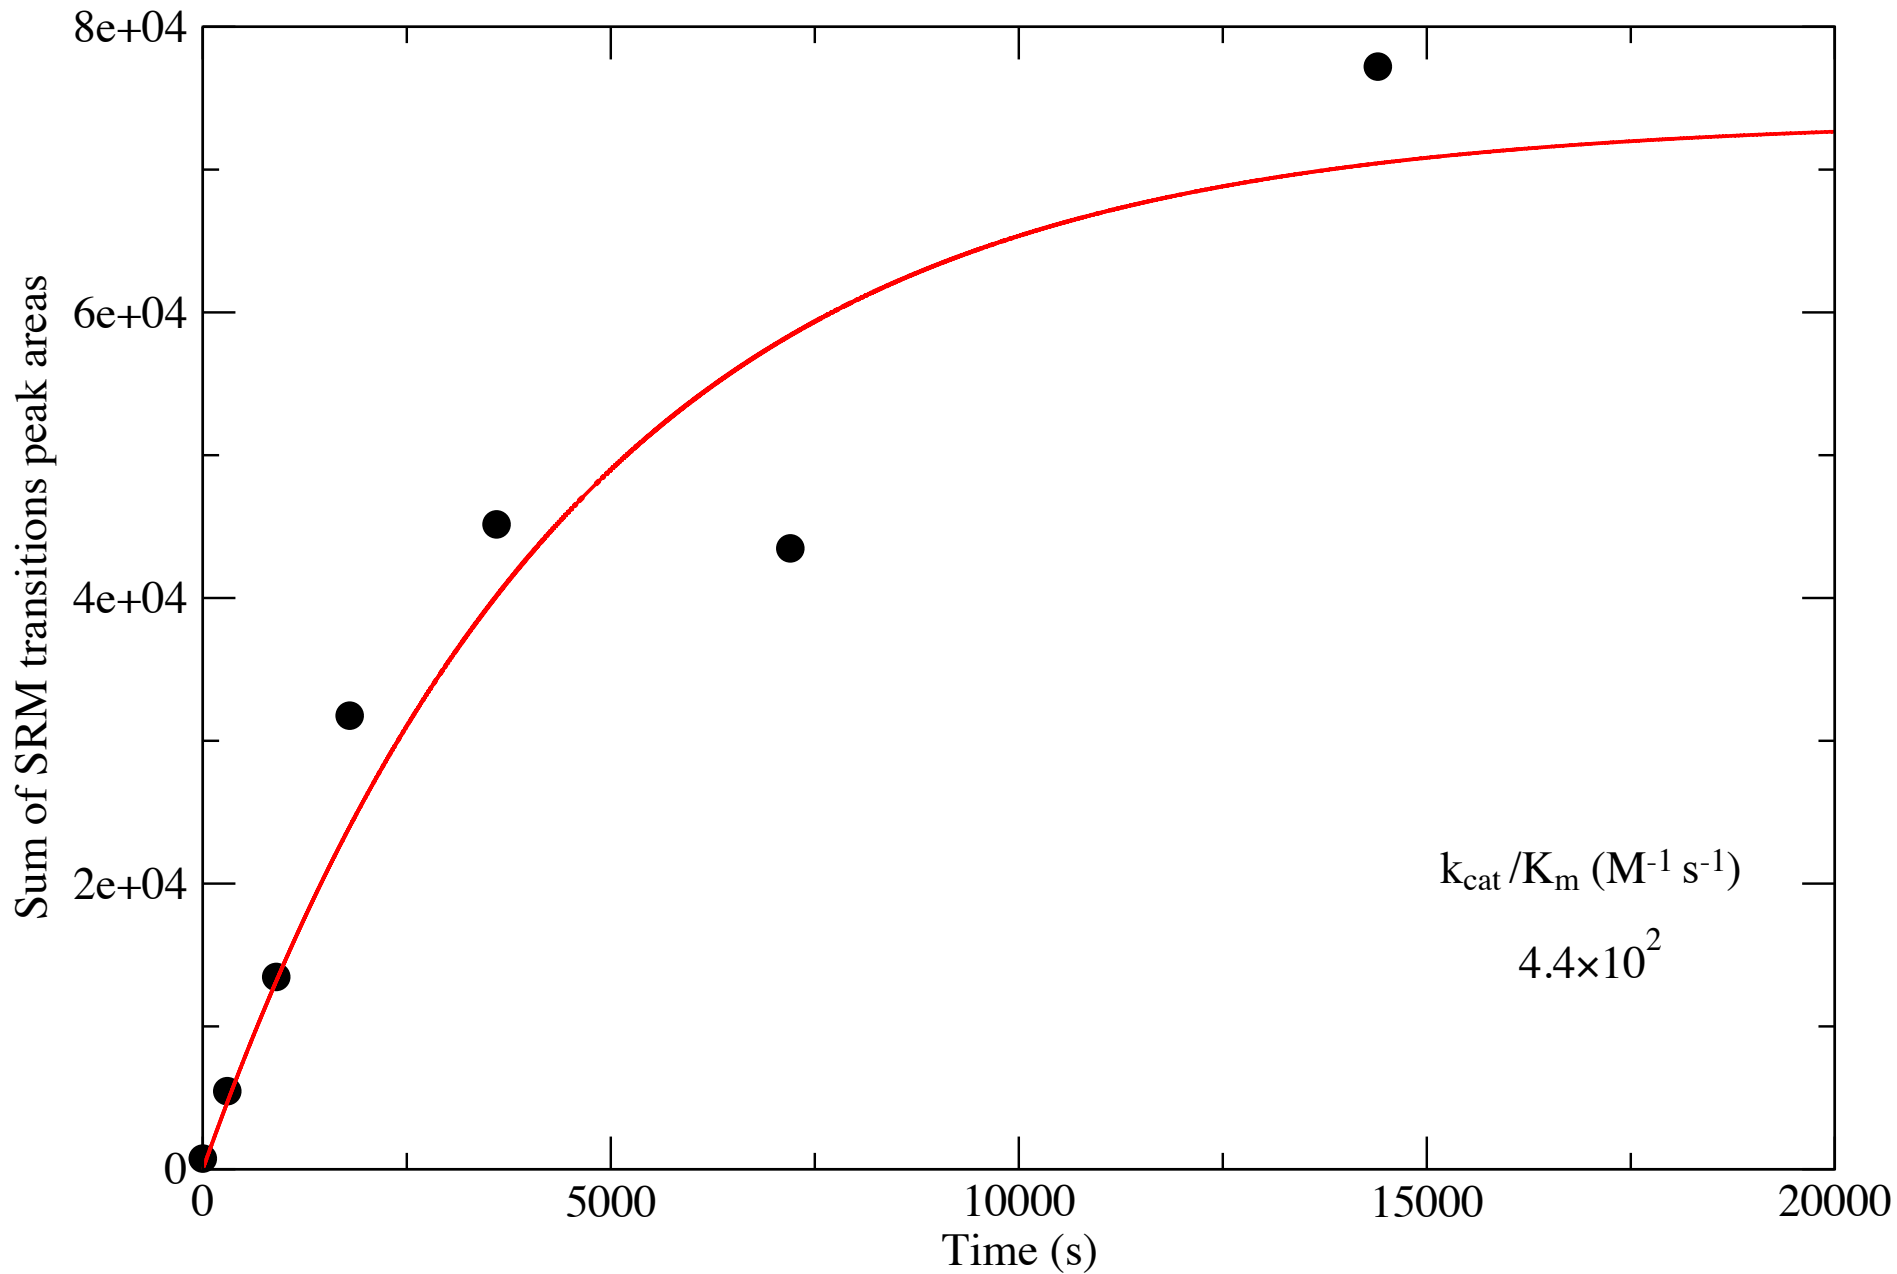

# RIOK1\_HUMAN (SVINKVTEK)

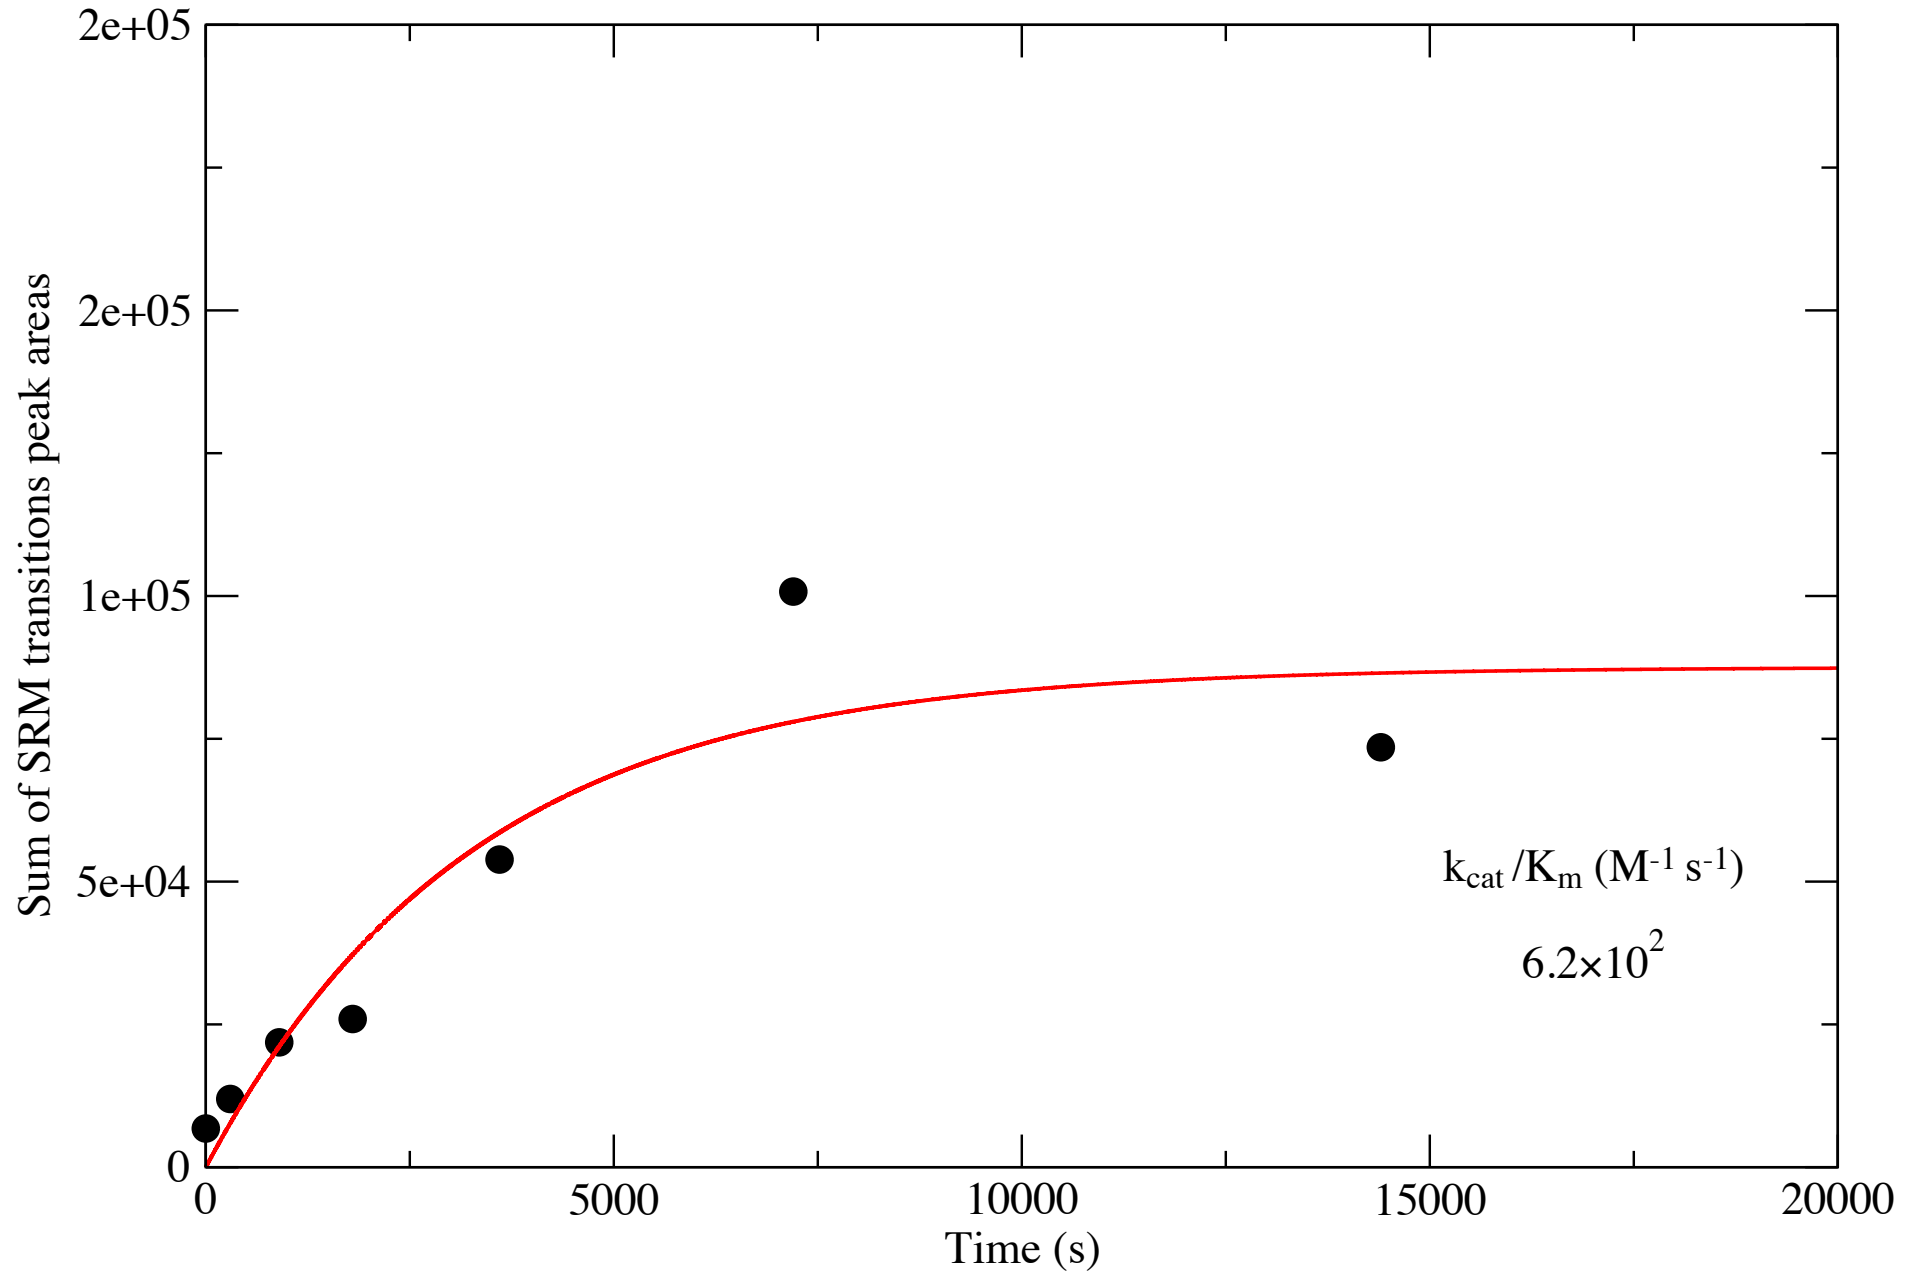

# RIOK2\_HUMAN (SLSEESADAR)

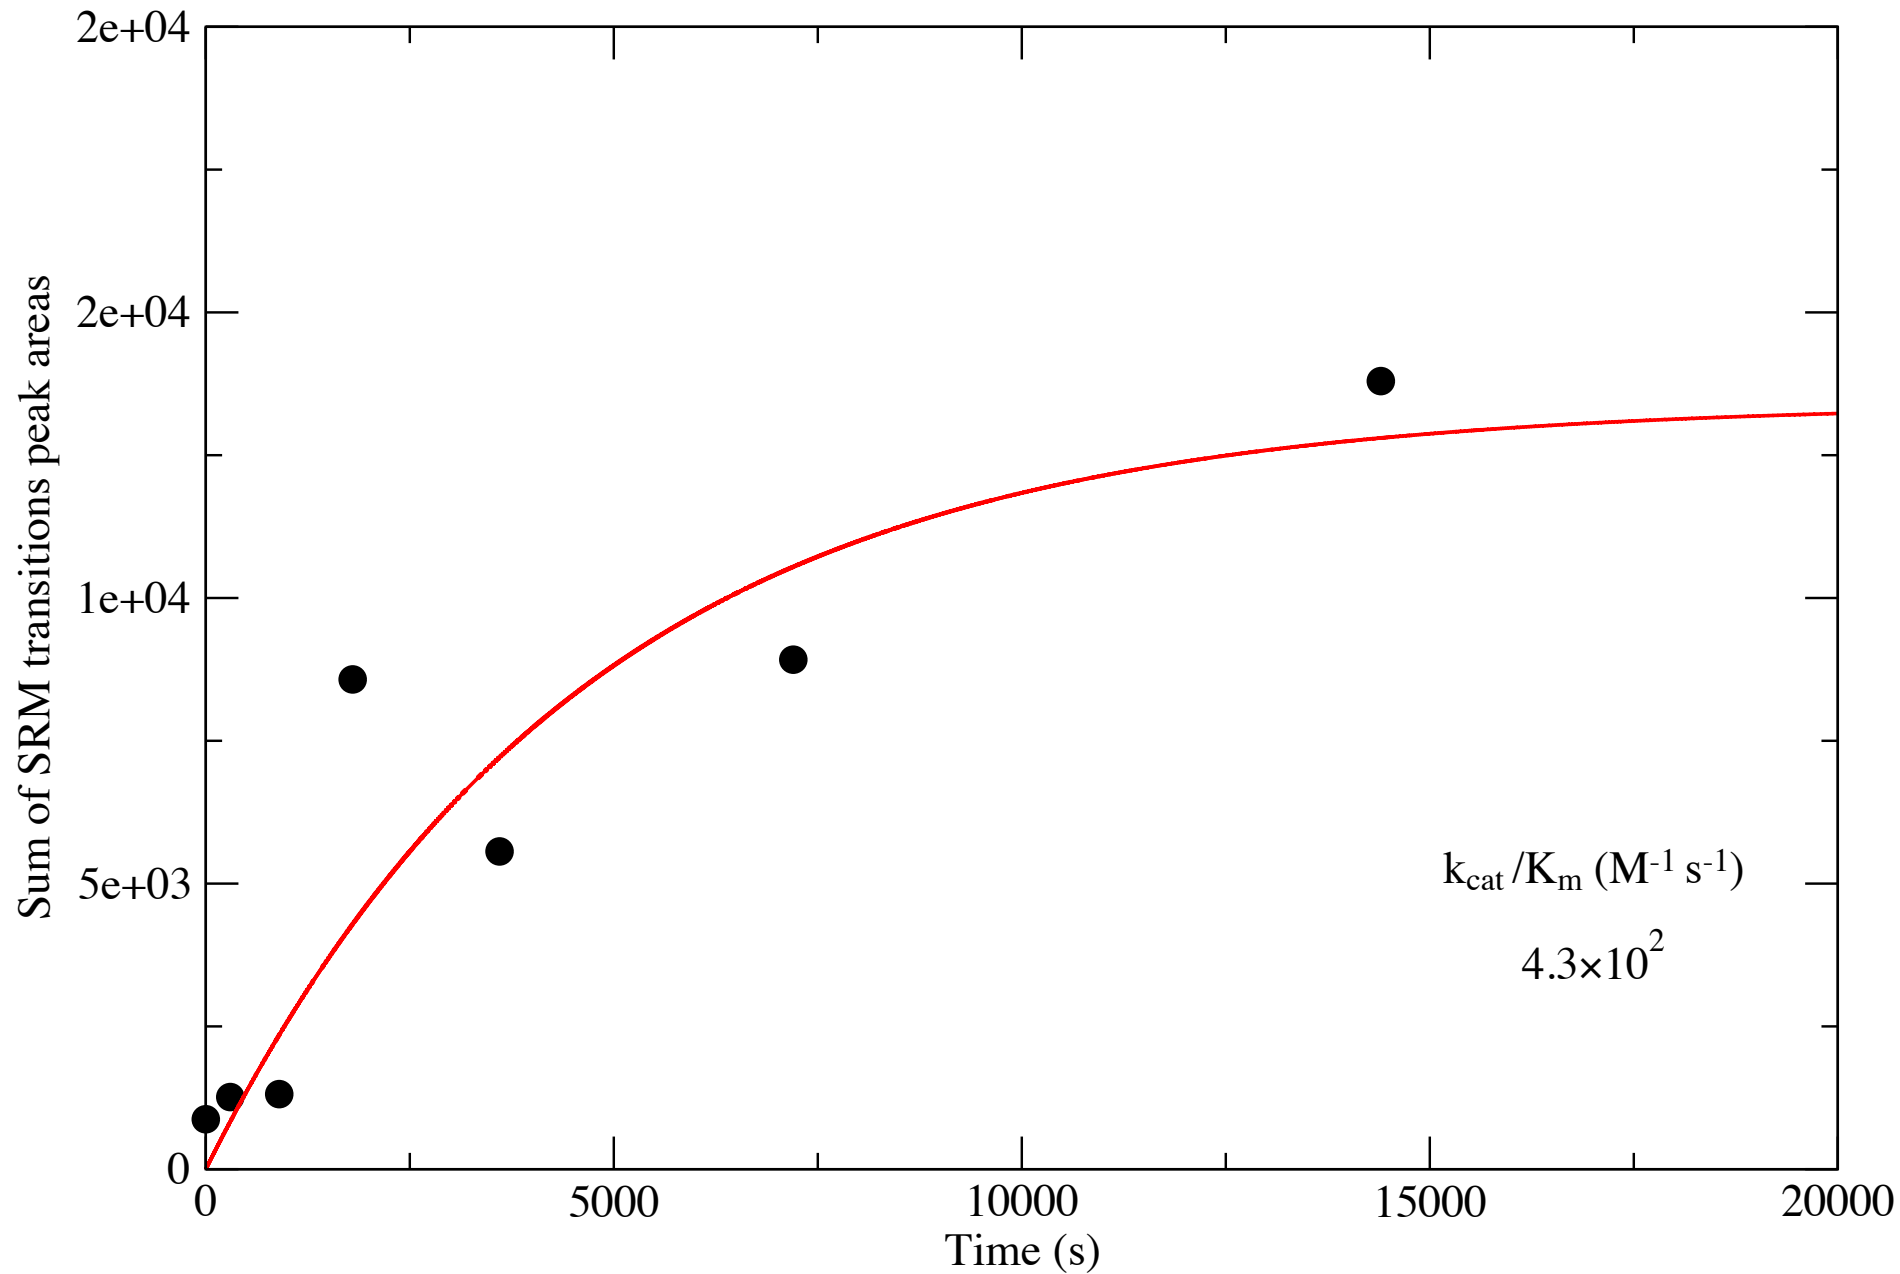



# RL17\_HUMAN (SLVIEHIQVVKAPK)

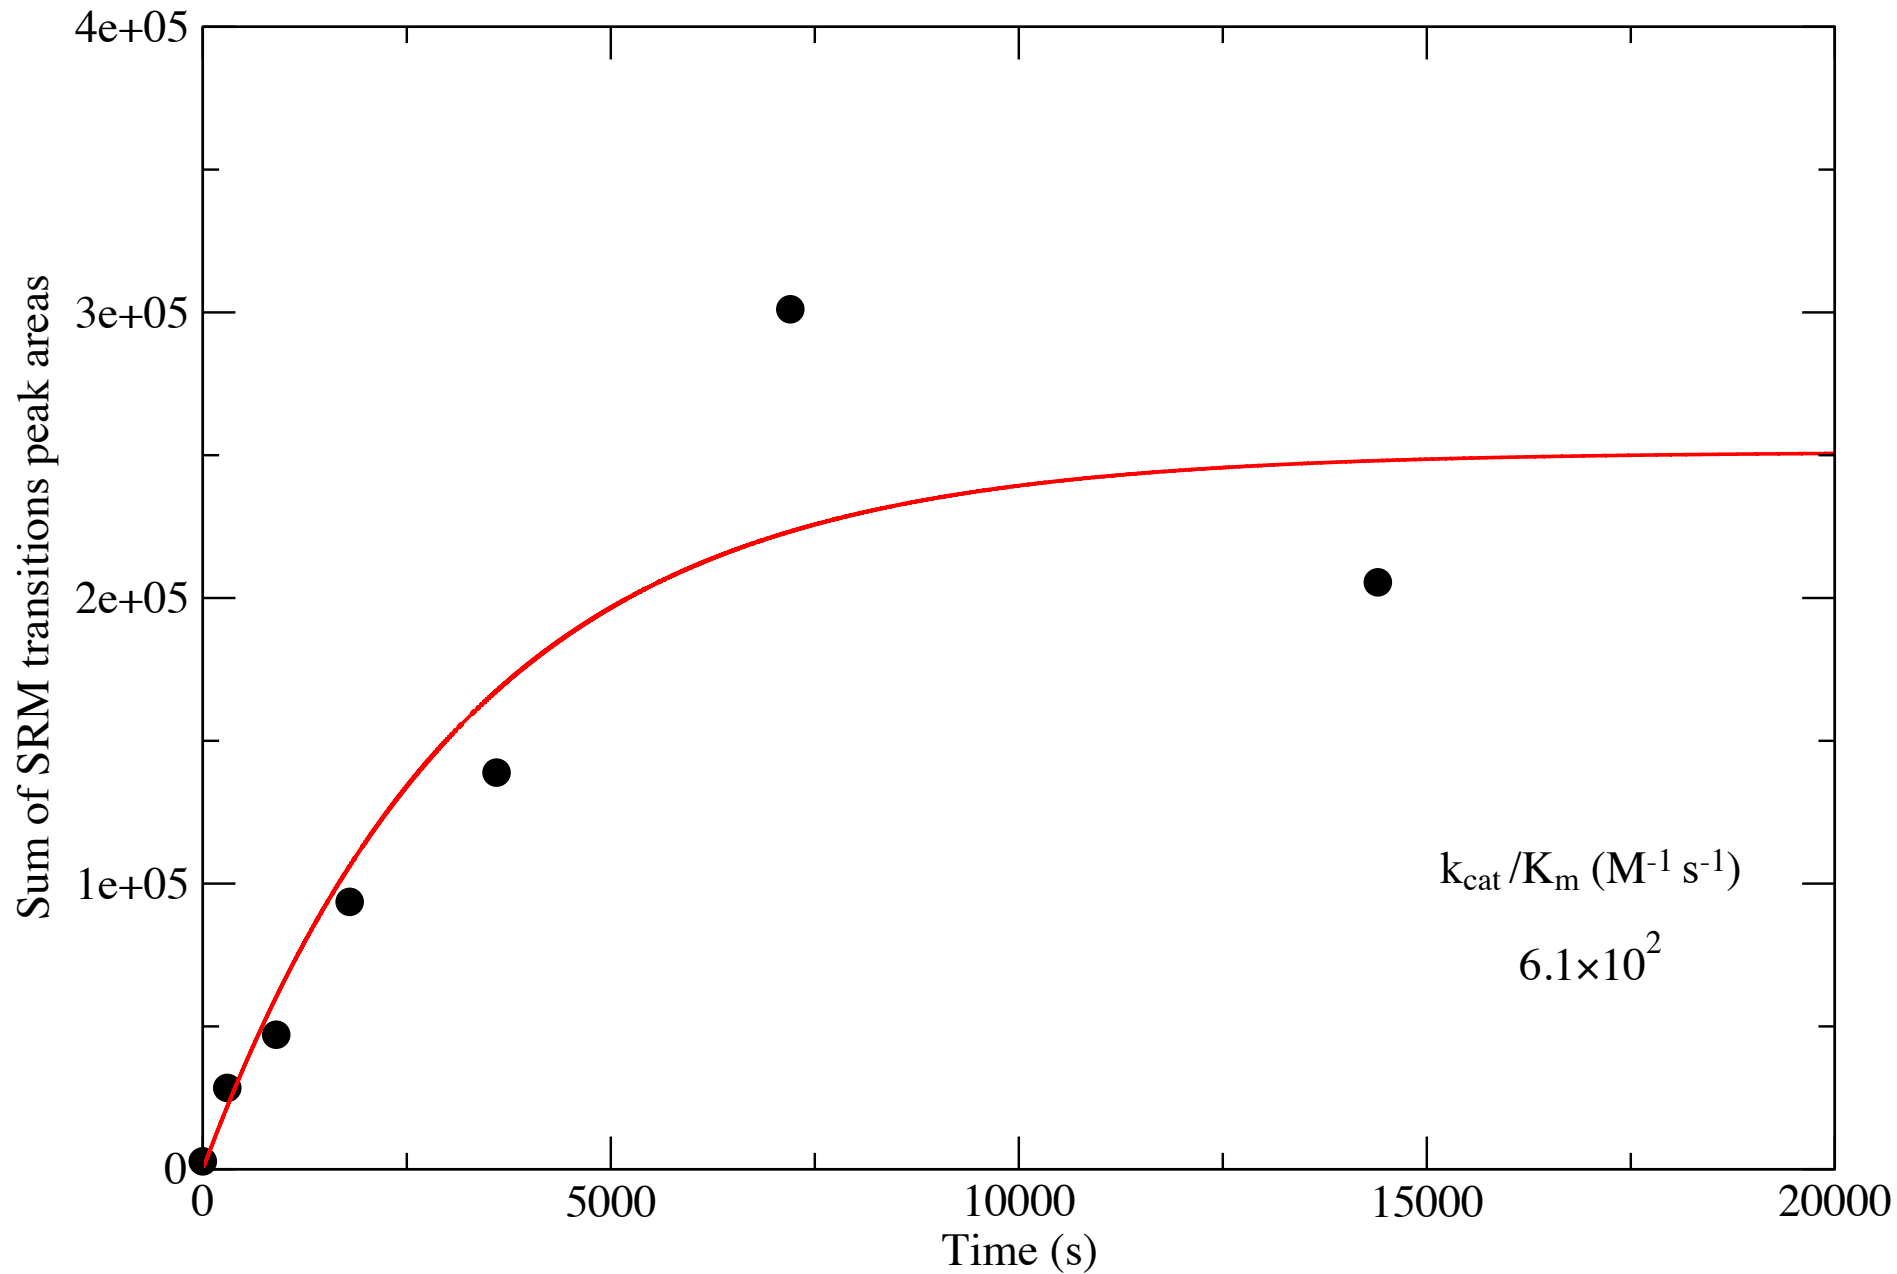

# RN138\_HUMAN (FYCPVCQEVLK)

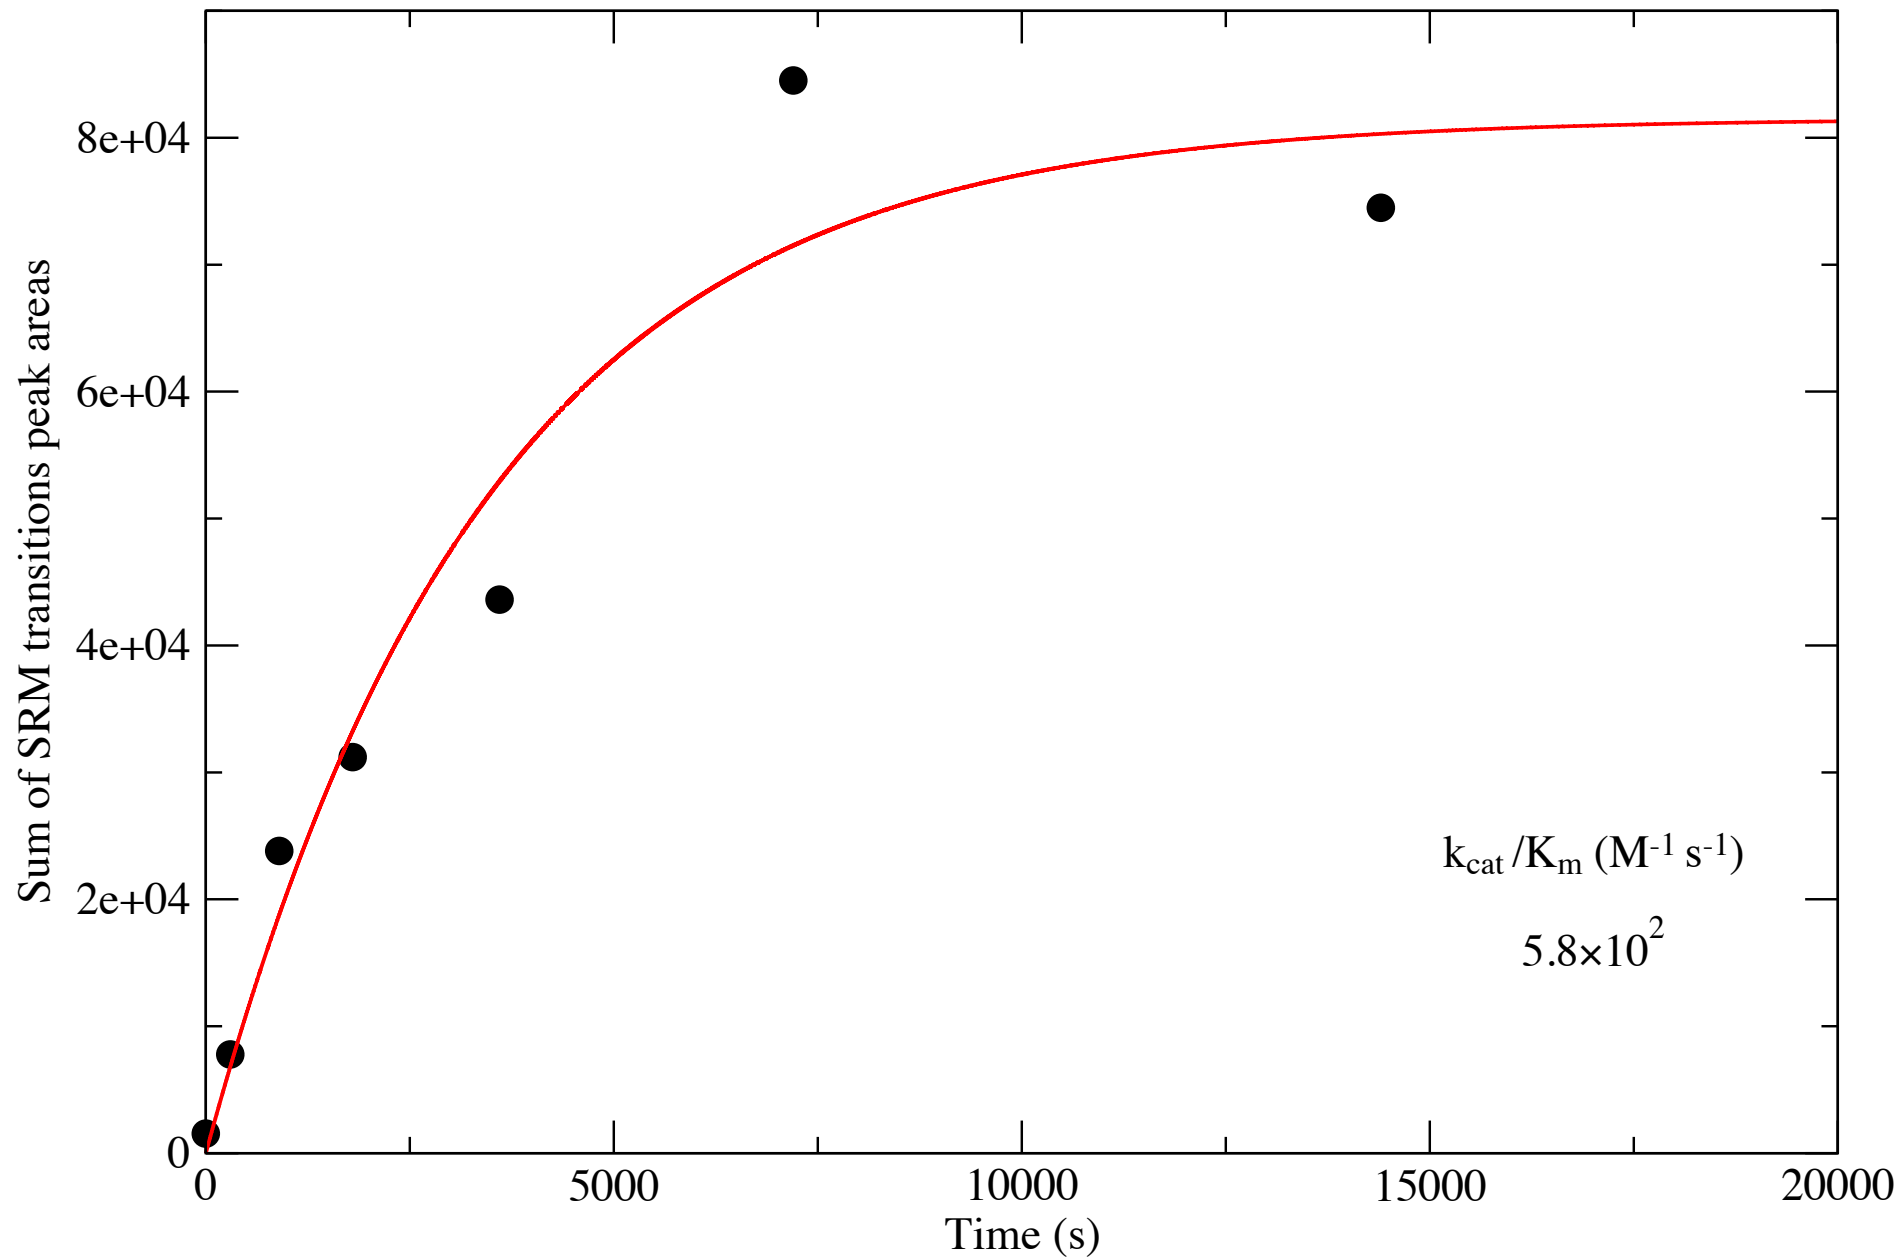

# RN138\_HUMAN (FYCPVCQEVLKTPVR)

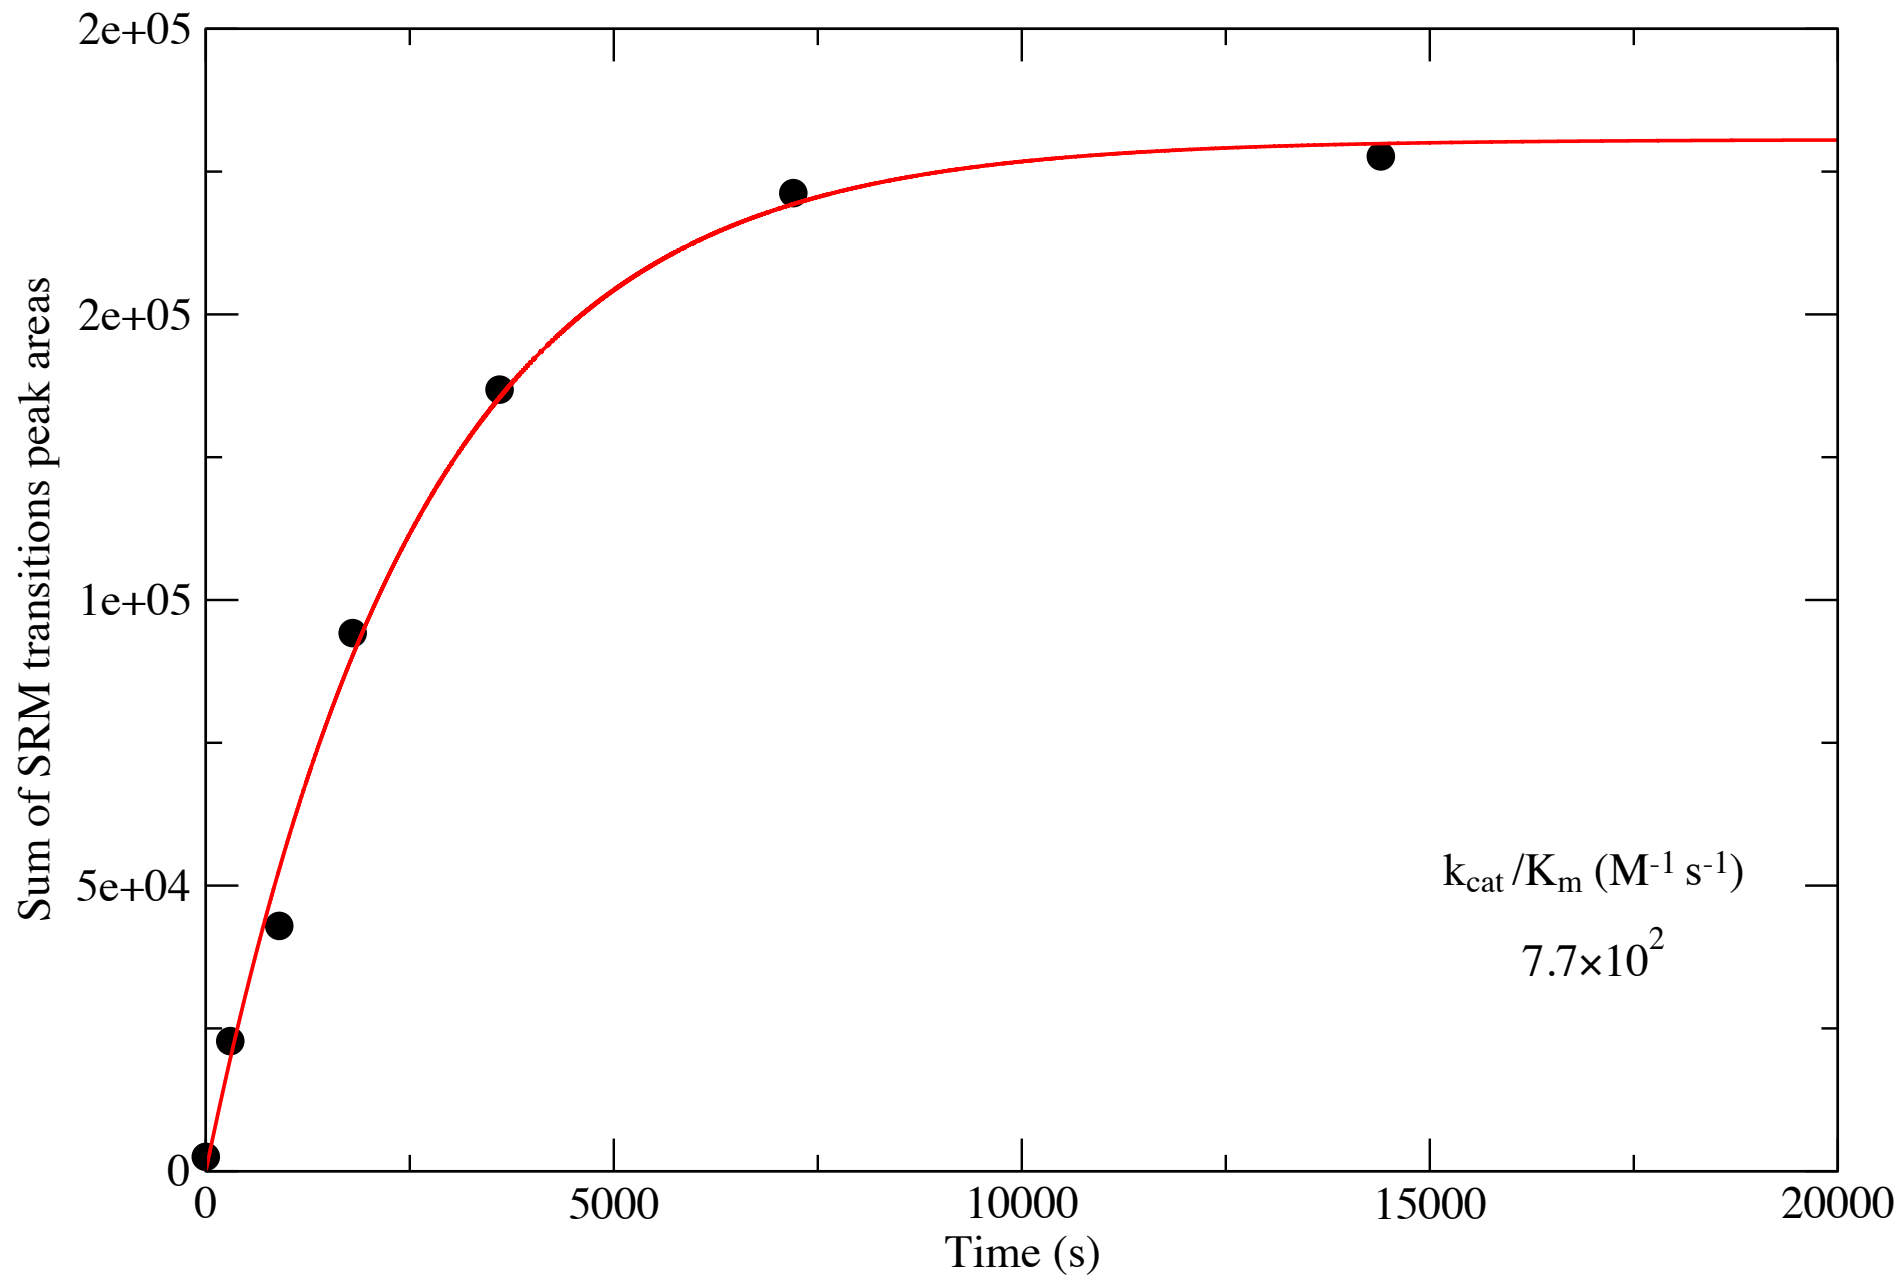

# RN213\_HUMAN (AVAEPANAVK)

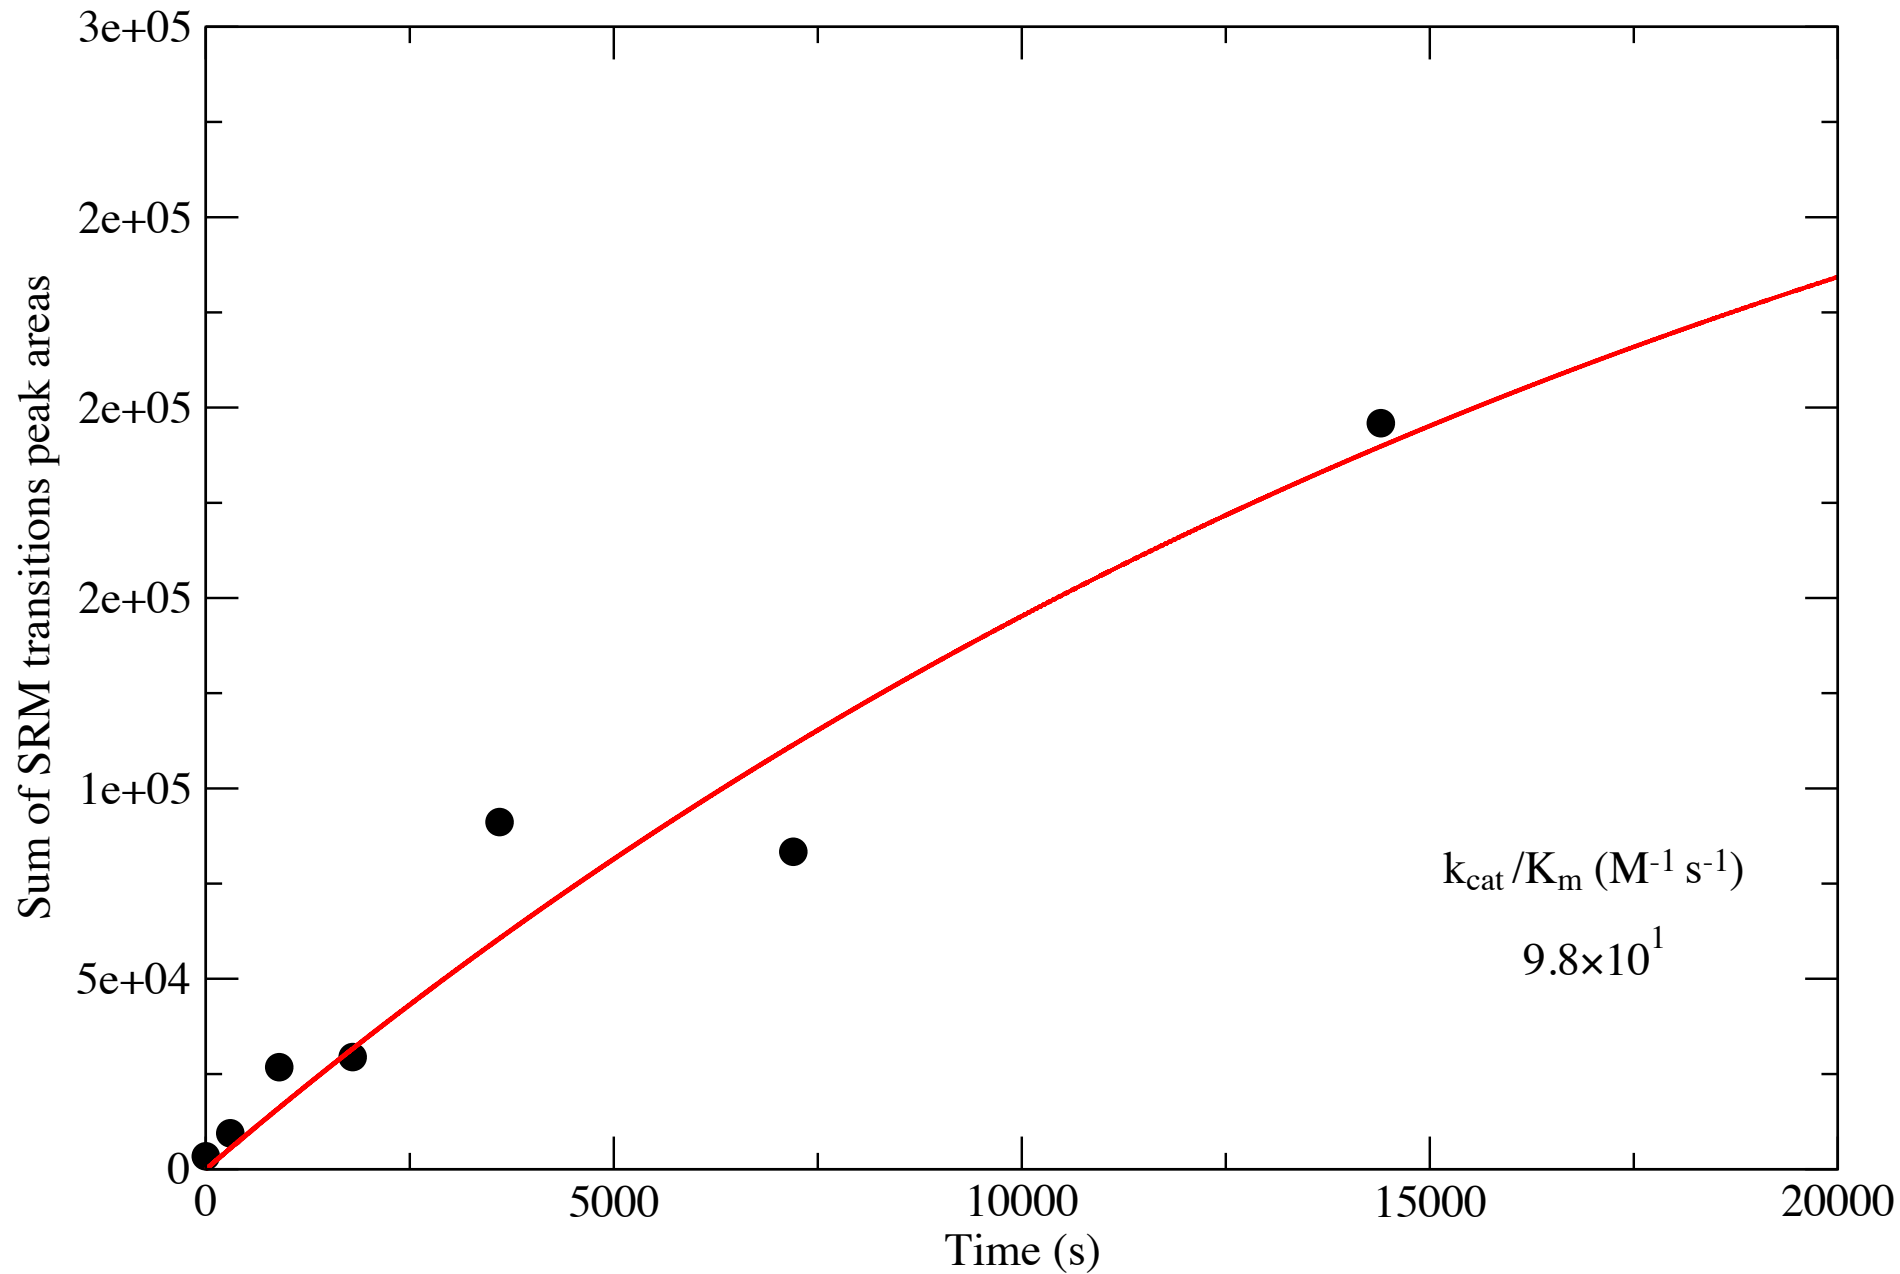

# RN213\_HUMAN (GVREEDLAPFSLR)

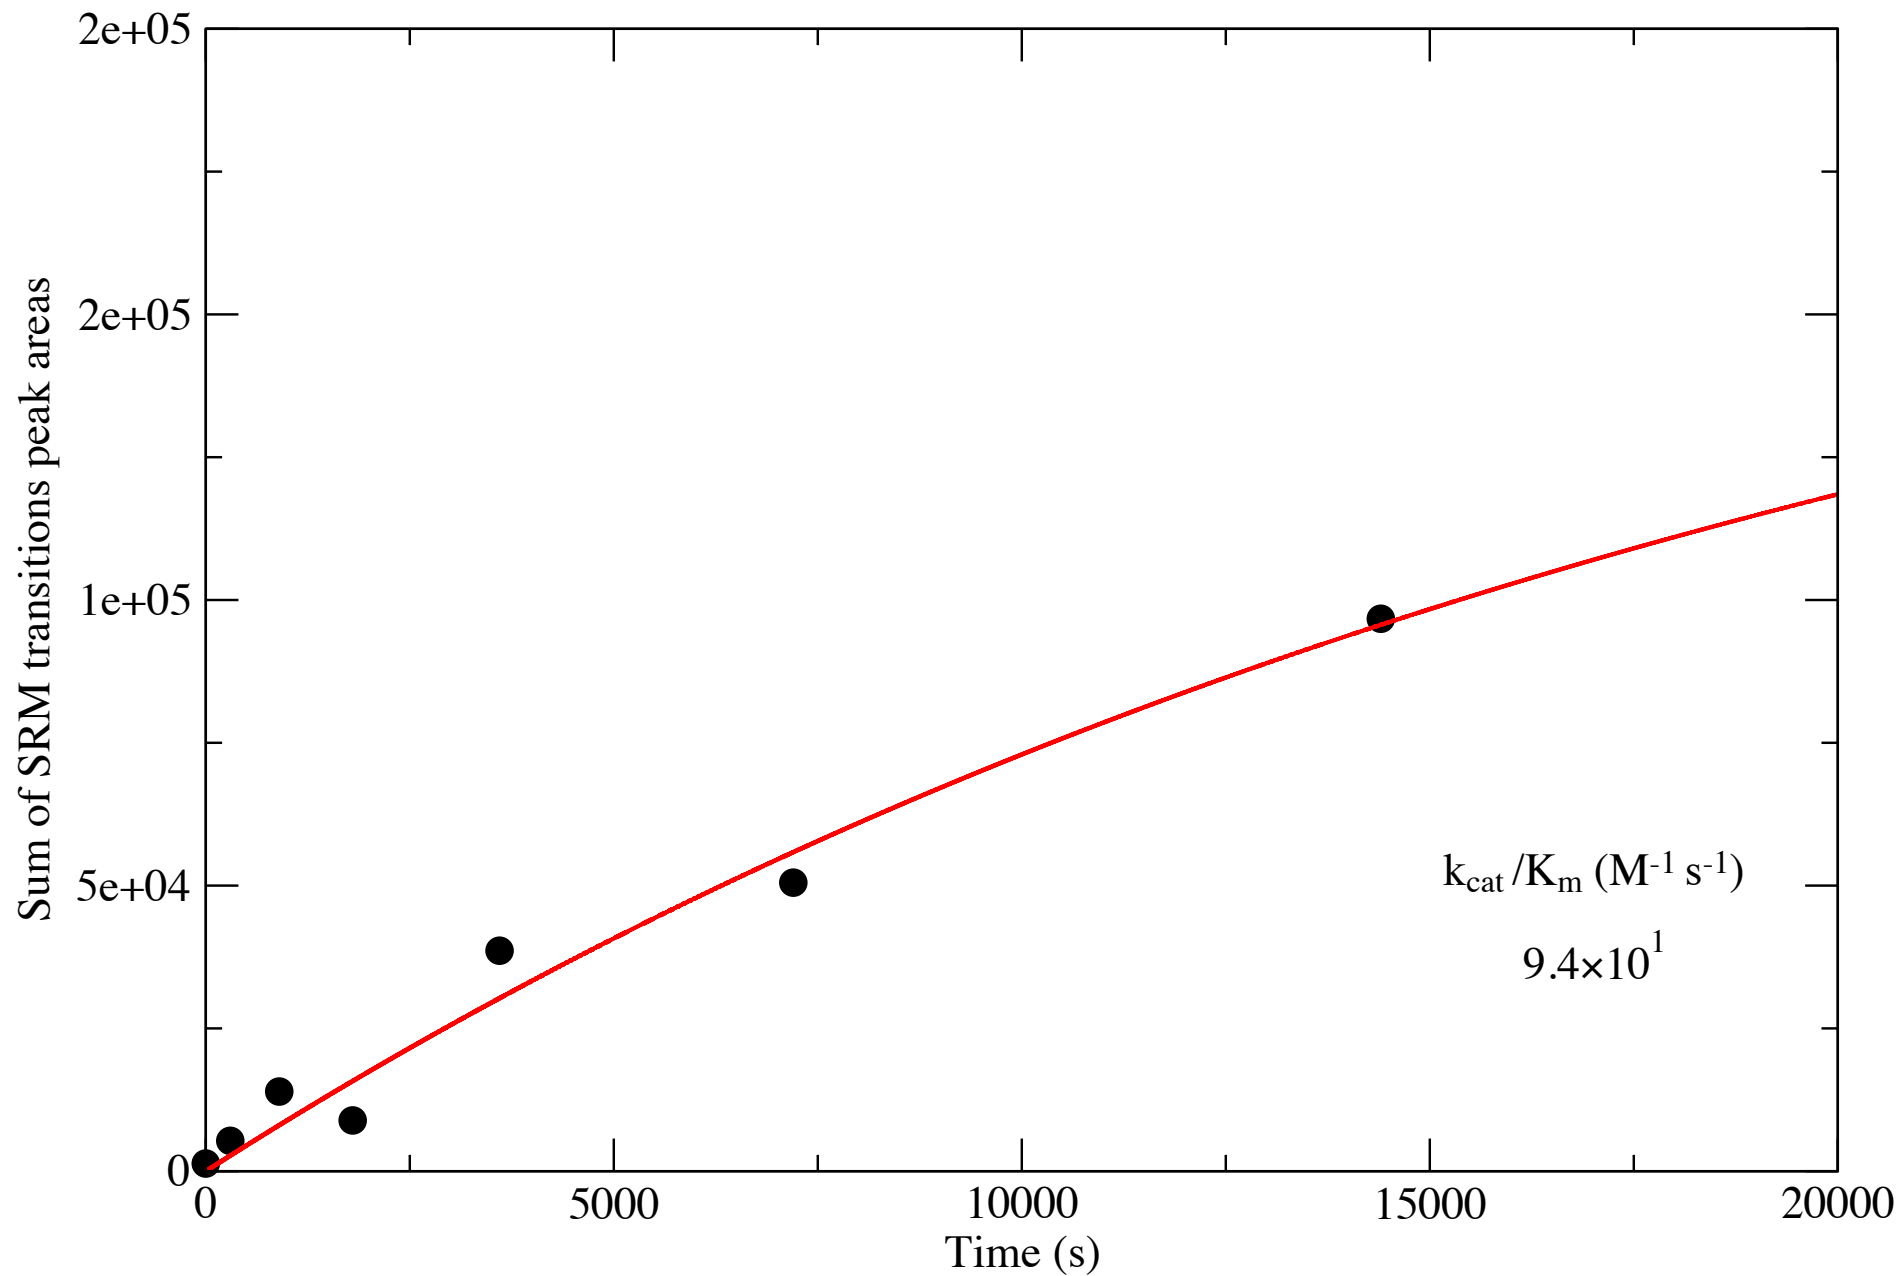

# RN220\_HUMAN (VIPCTGEEPGEAK)

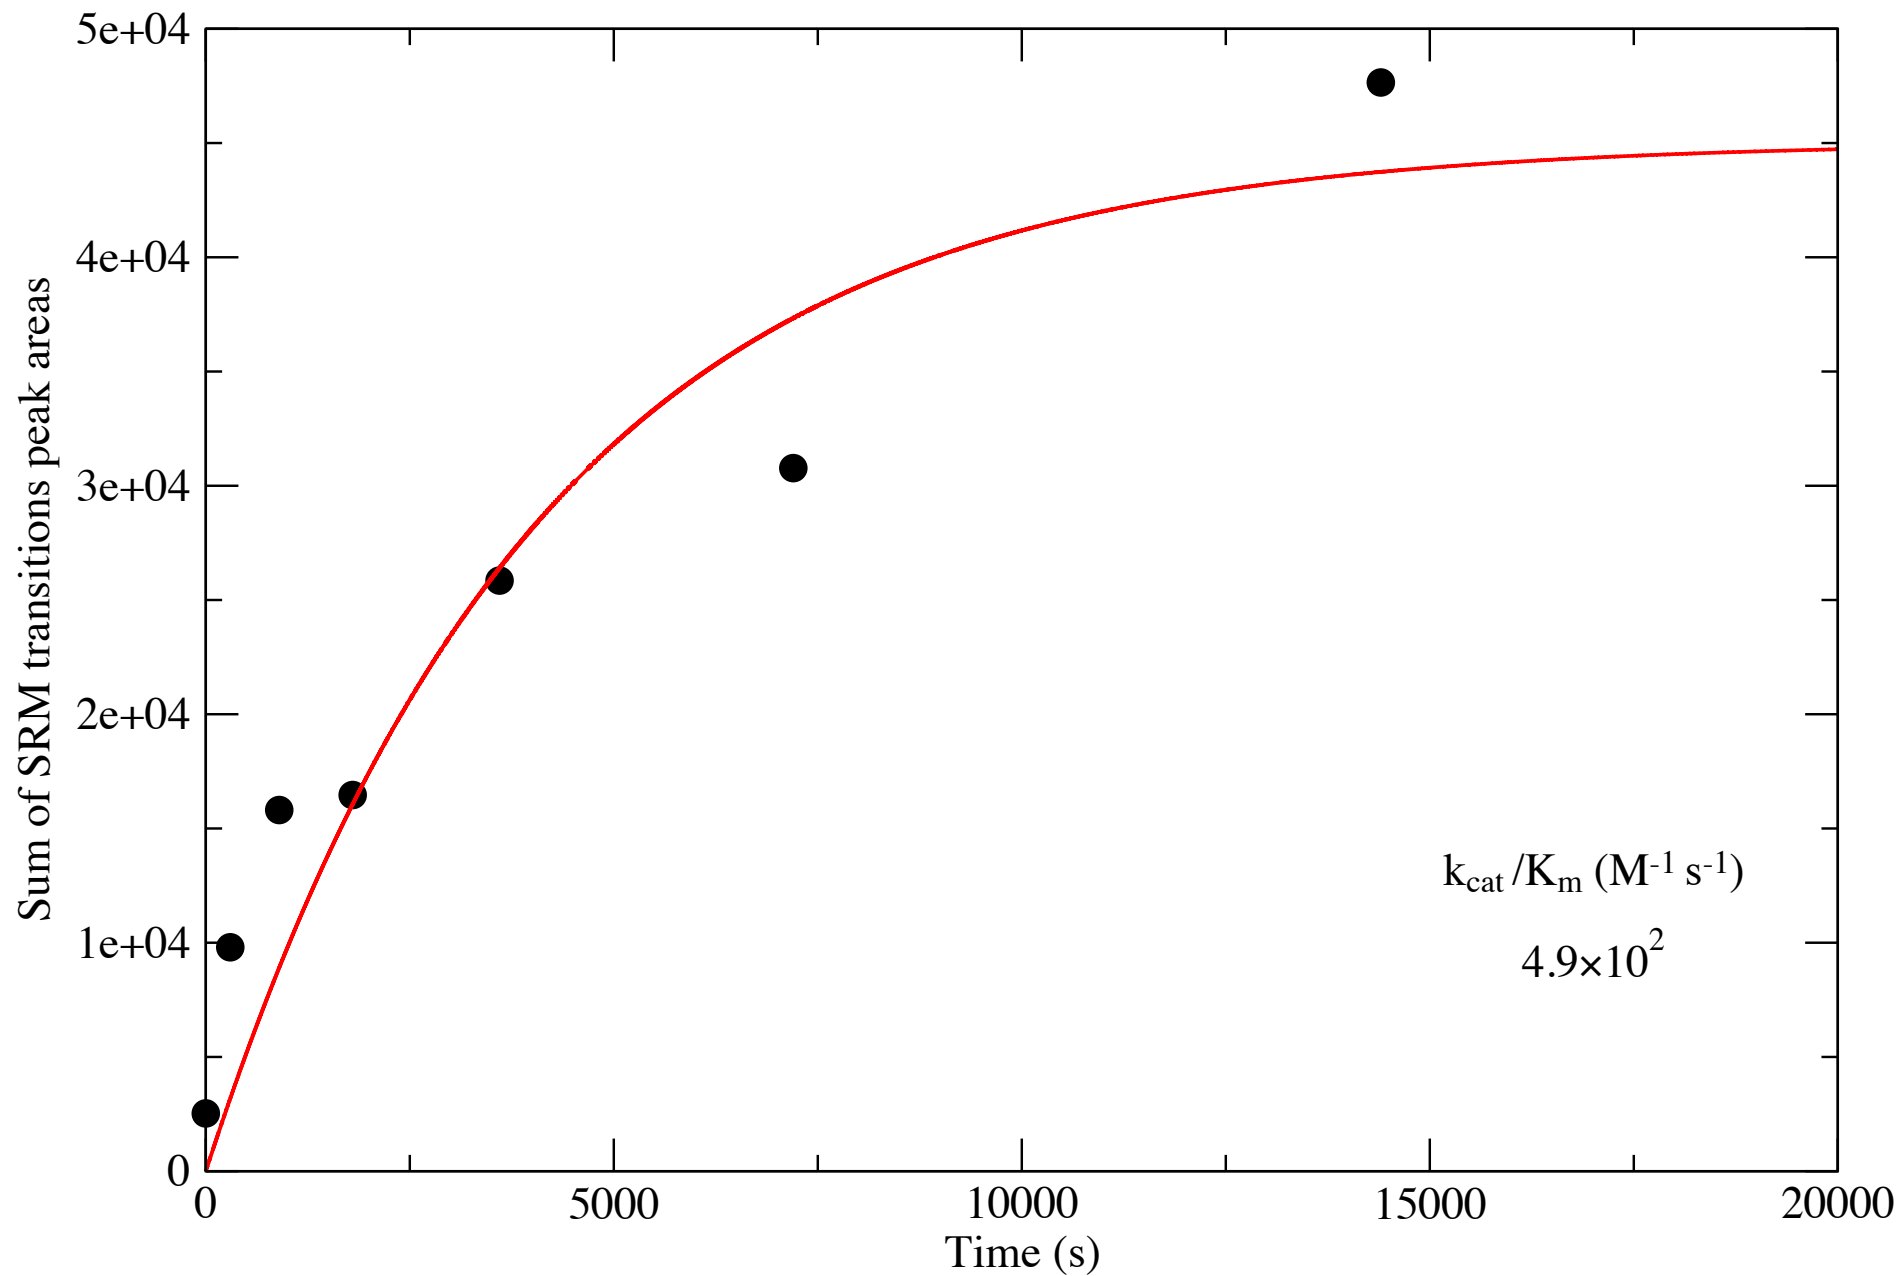

# RNF4\_HUMAN (SVVIVDER)

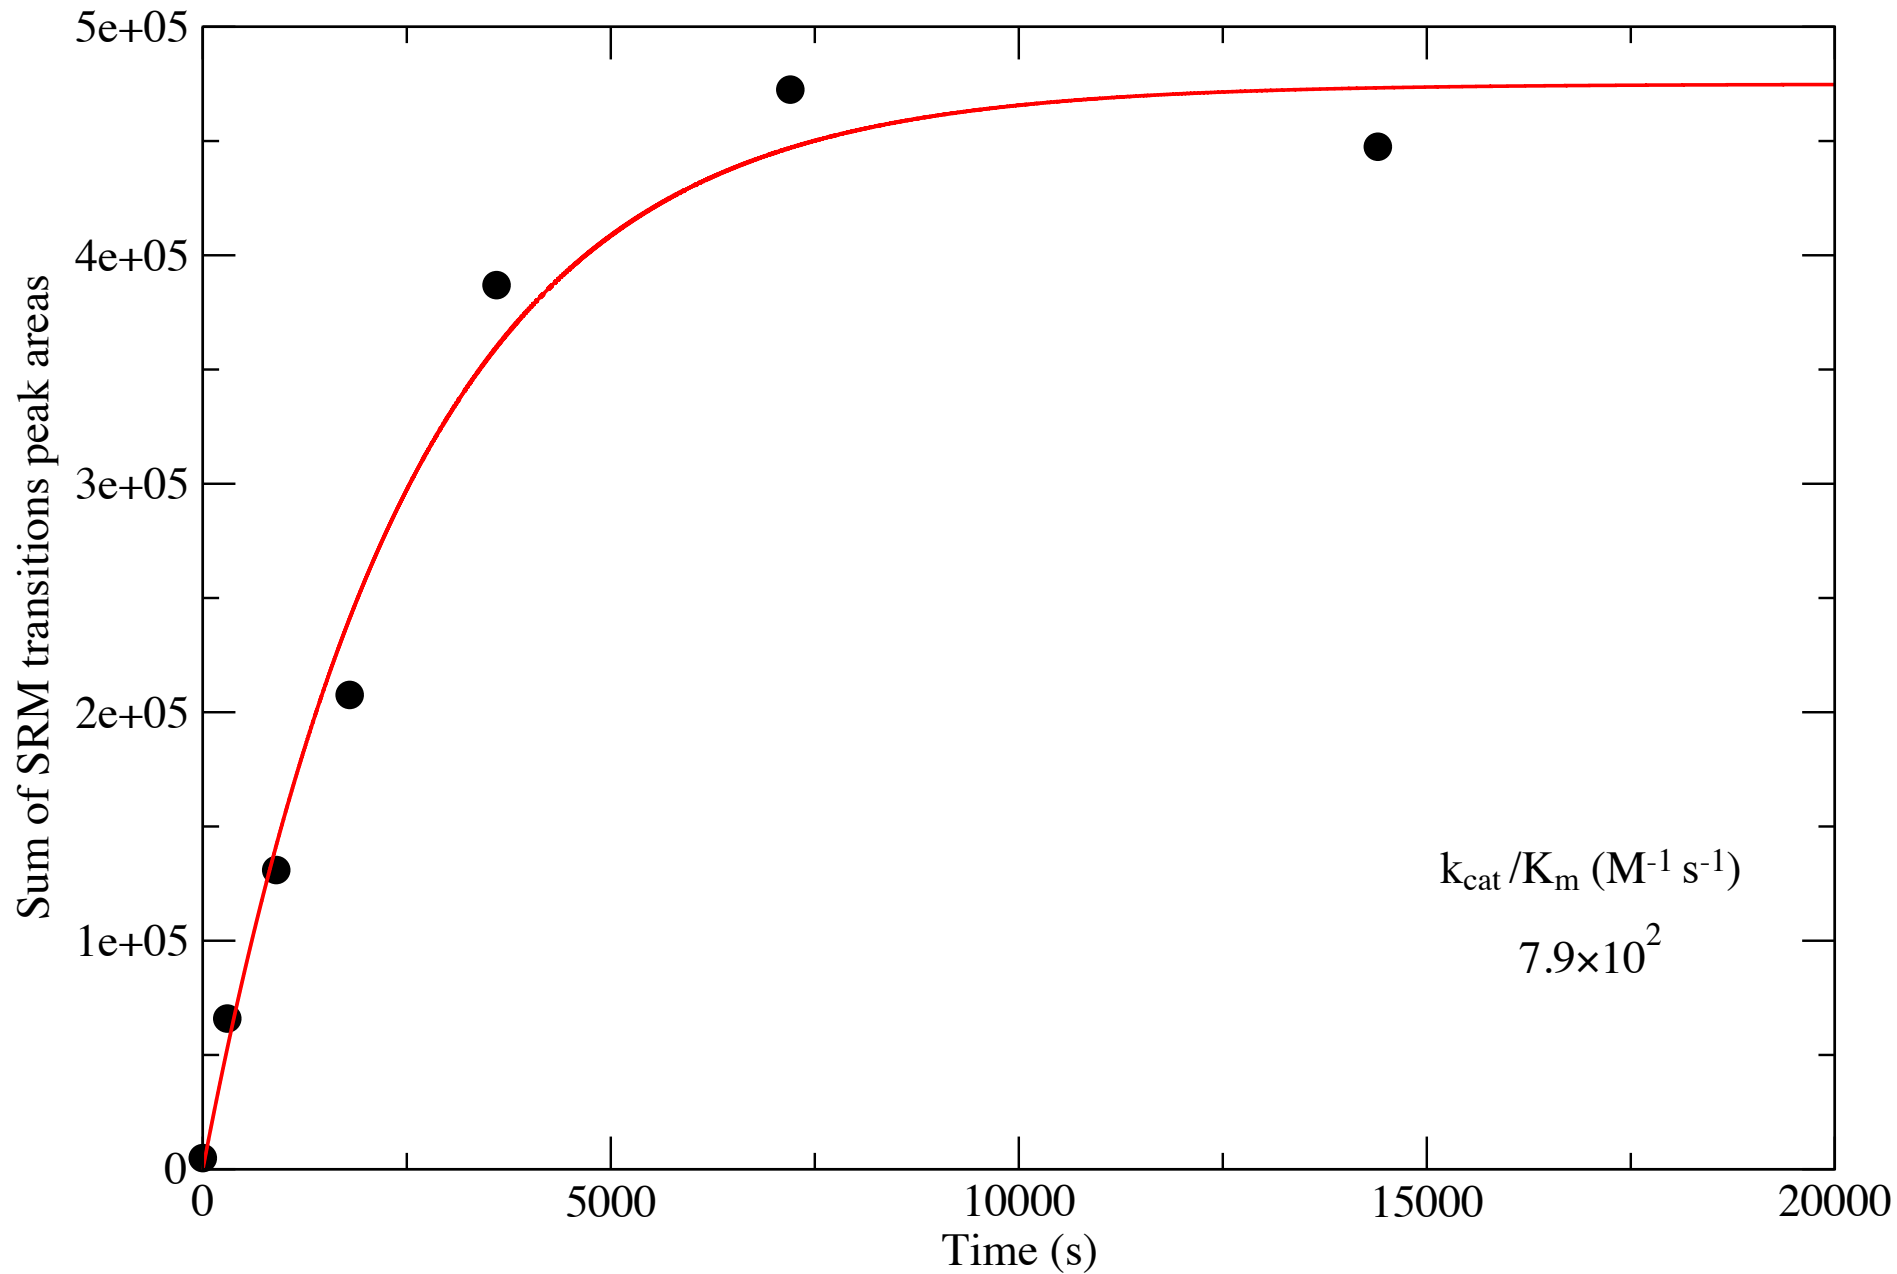

# RPA34\_HUMAN (MALGSPMDVR)

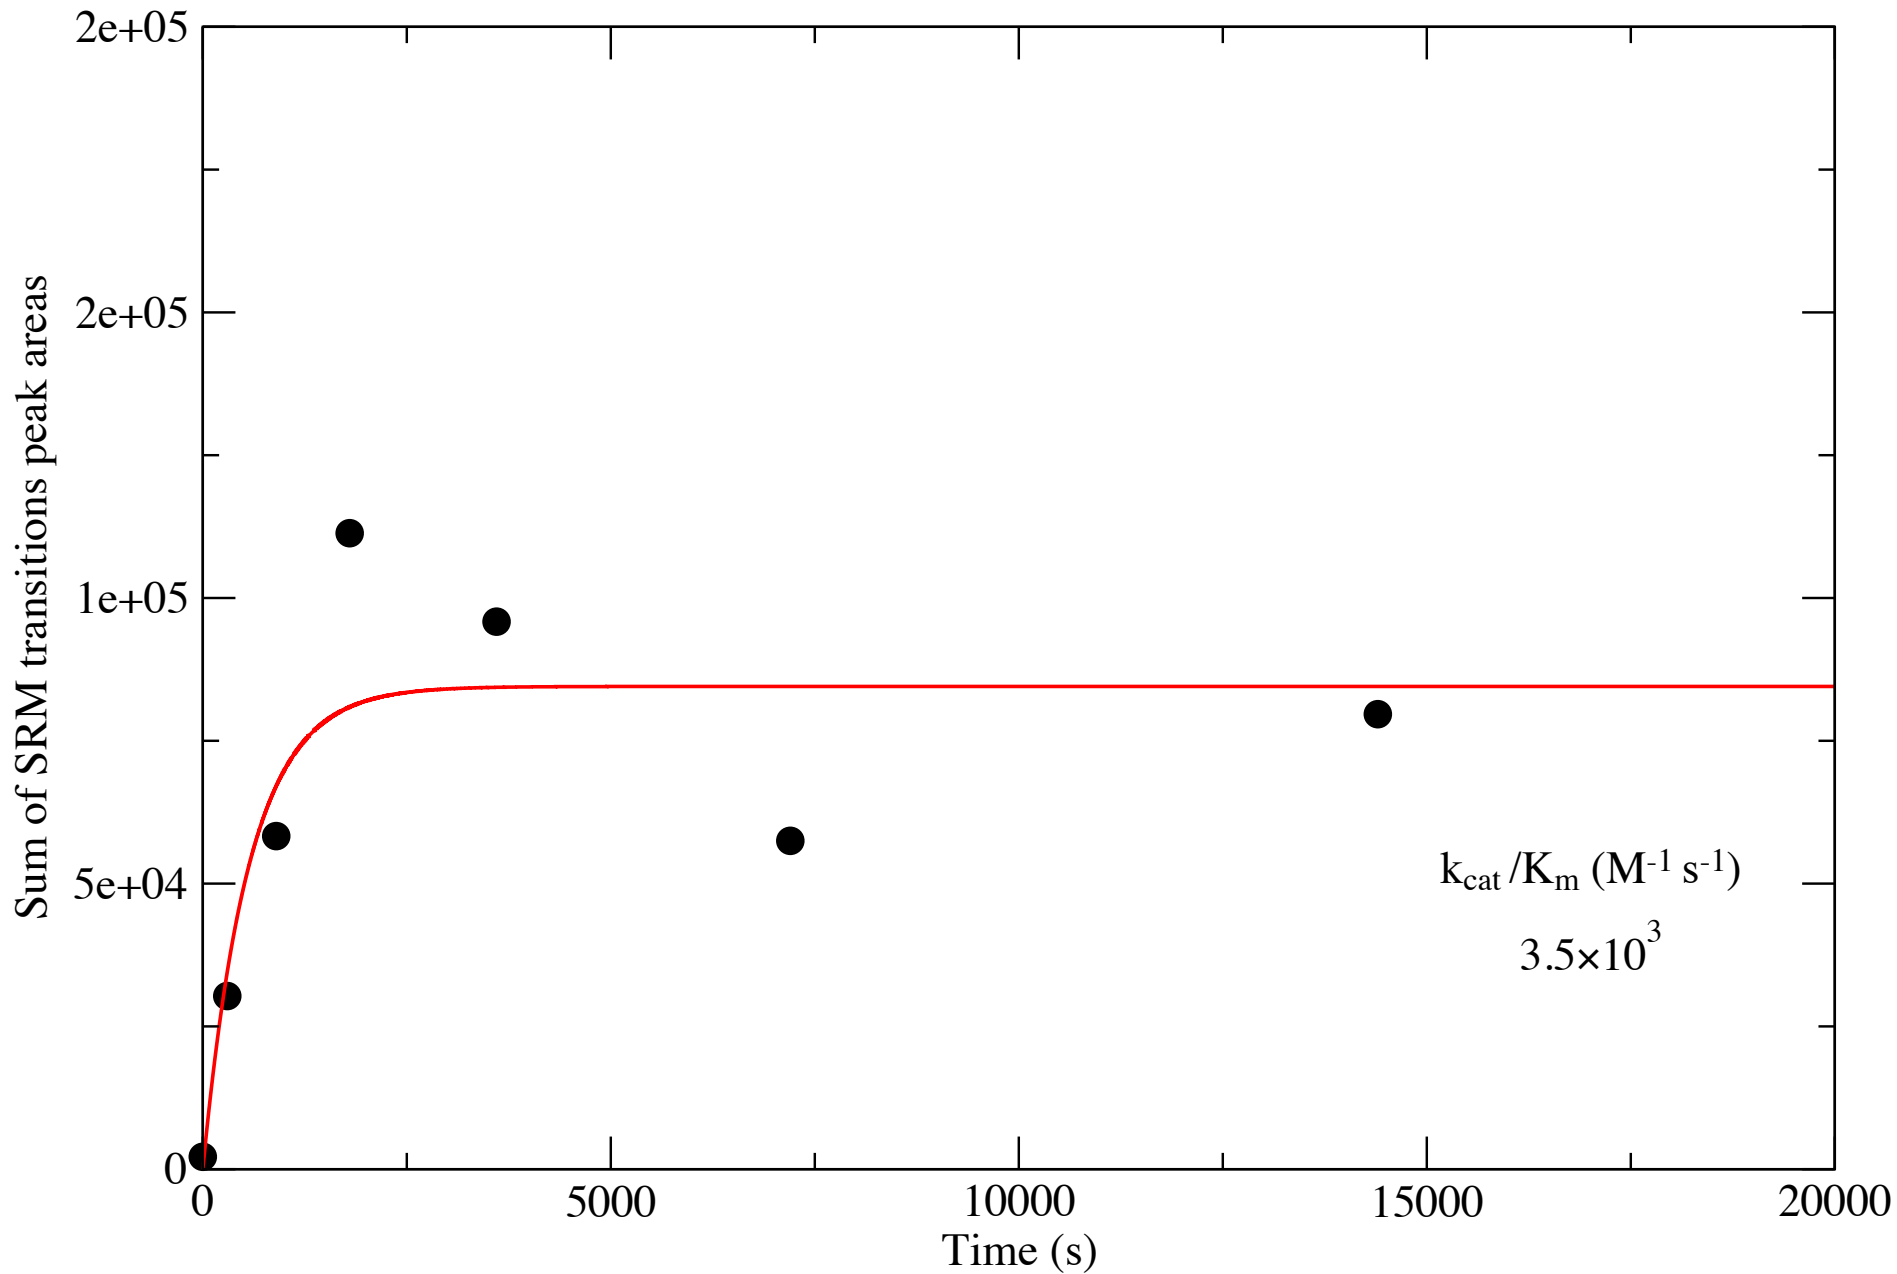



# RPGF6\_HUMAN (SMSAALQDER)

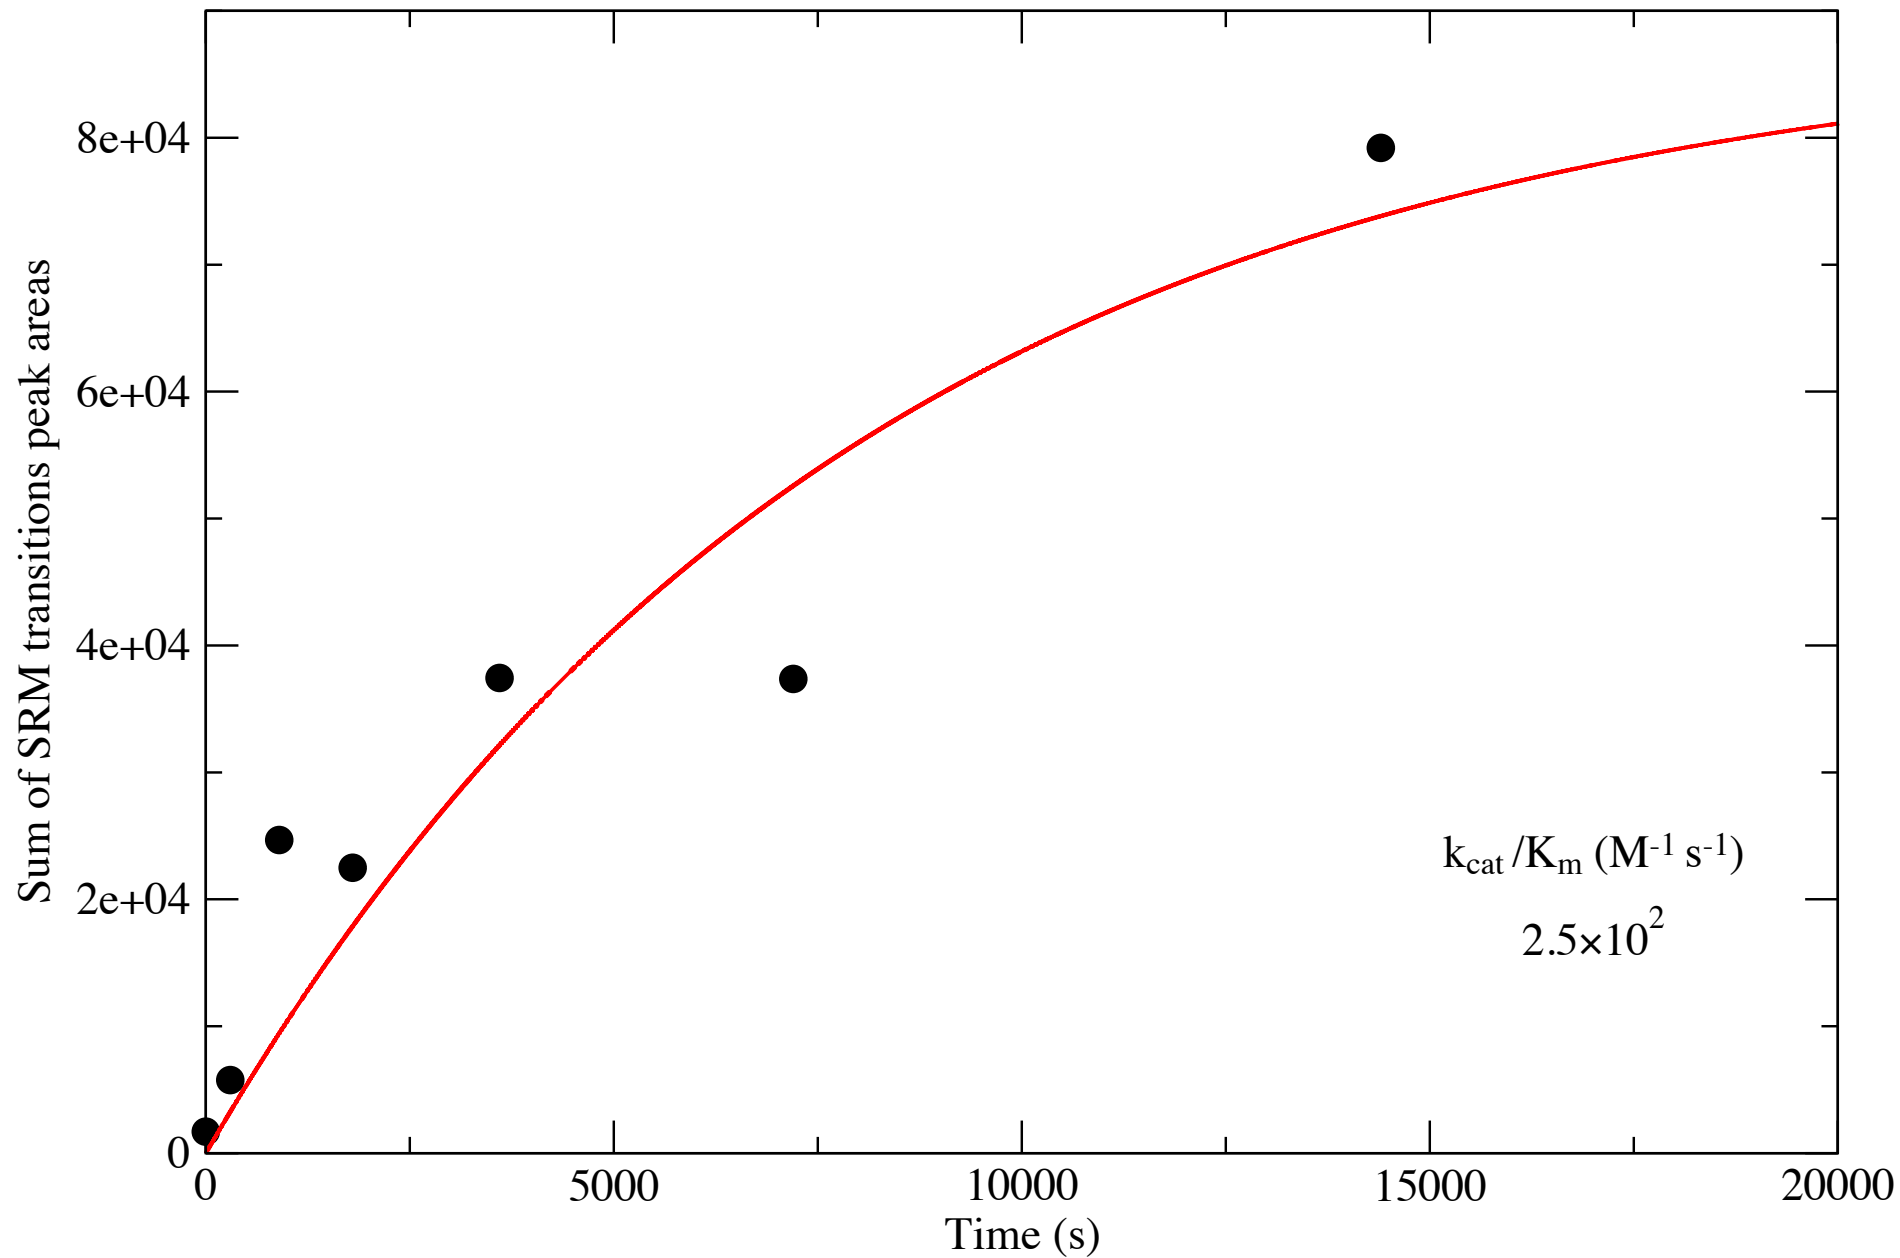

# RRP15\_HUMAN (GESSVGTMGWADAMAK)

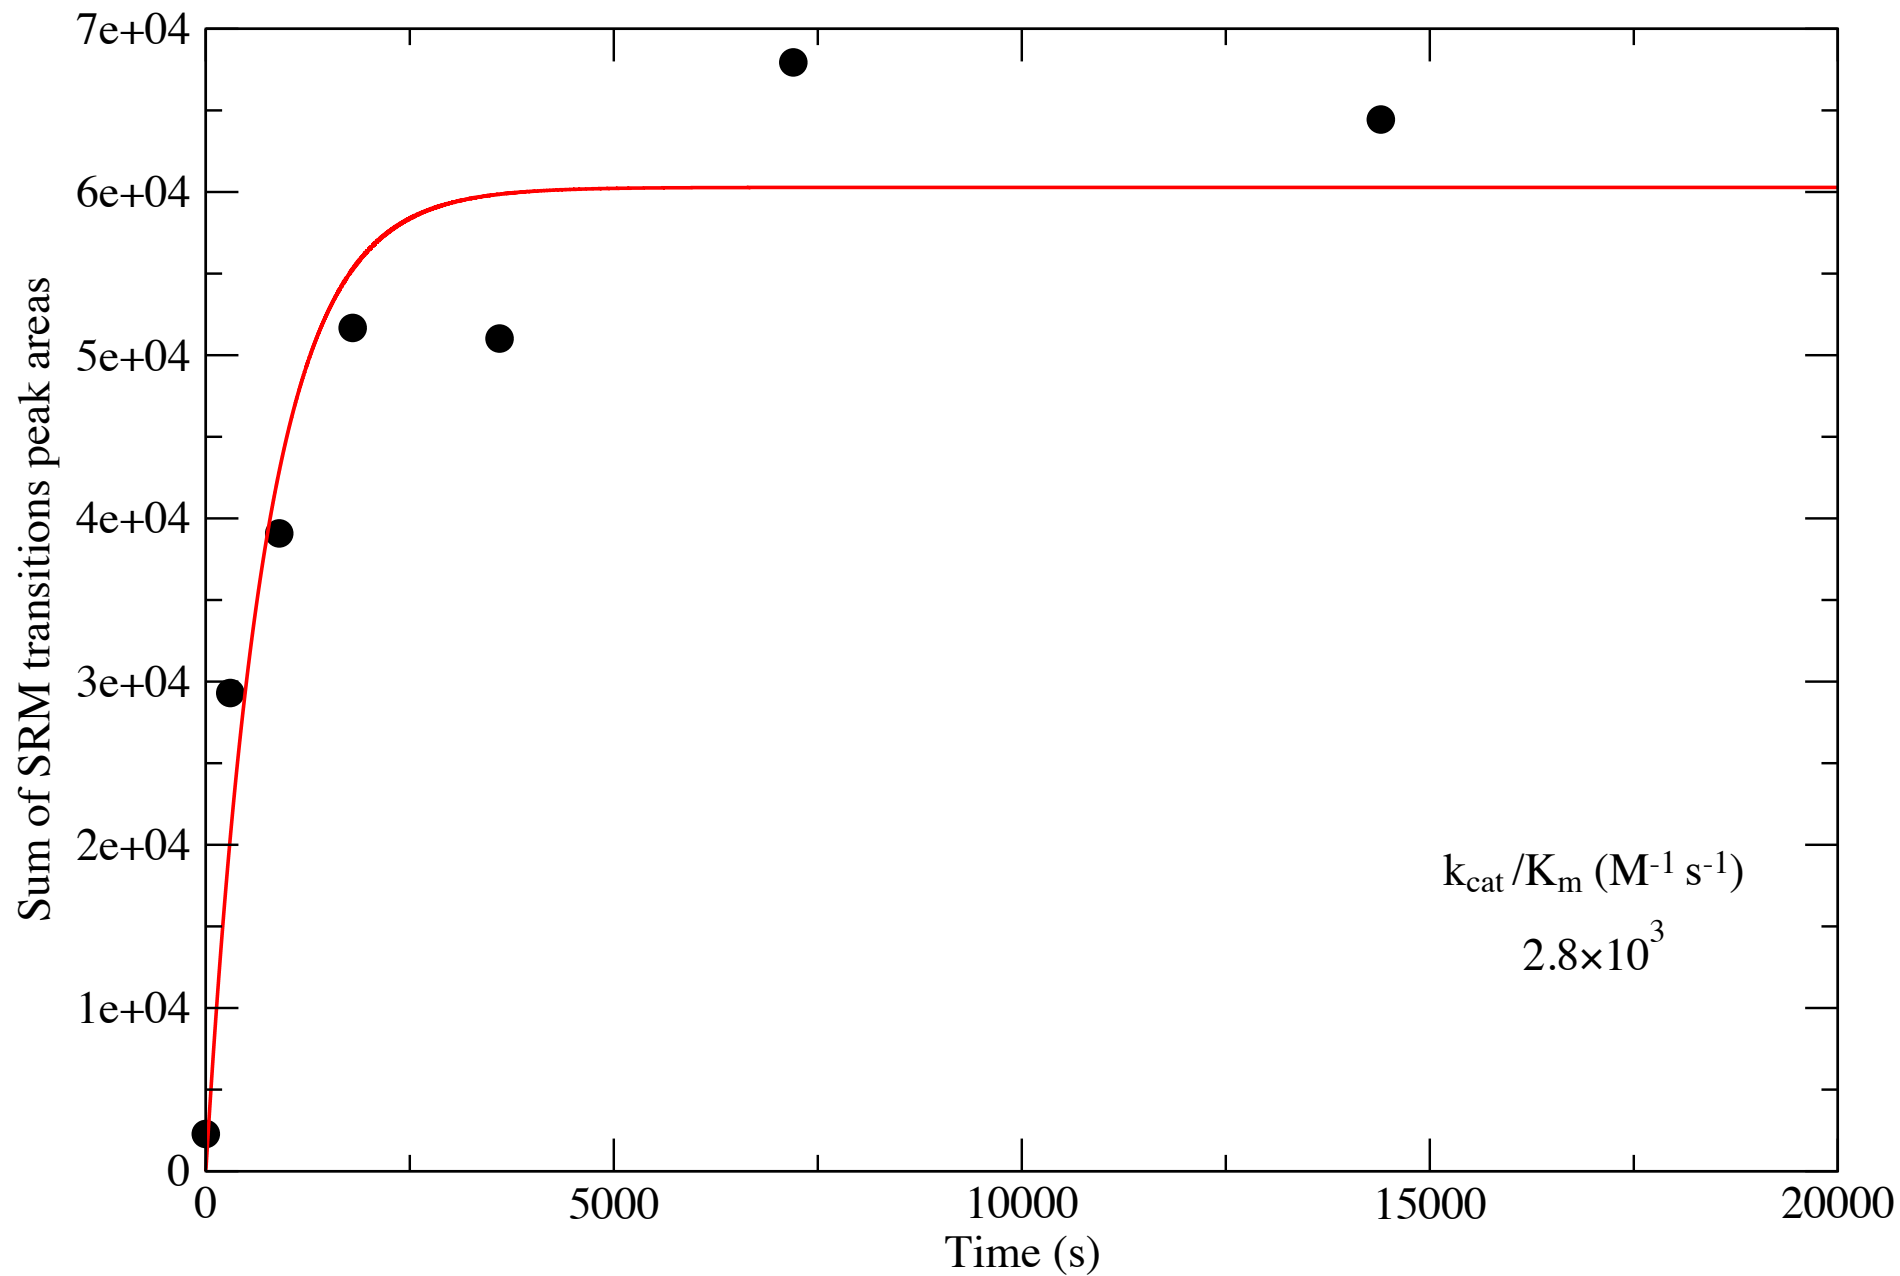

# RRP7A\_HUMAN (TFMEAYDQK)

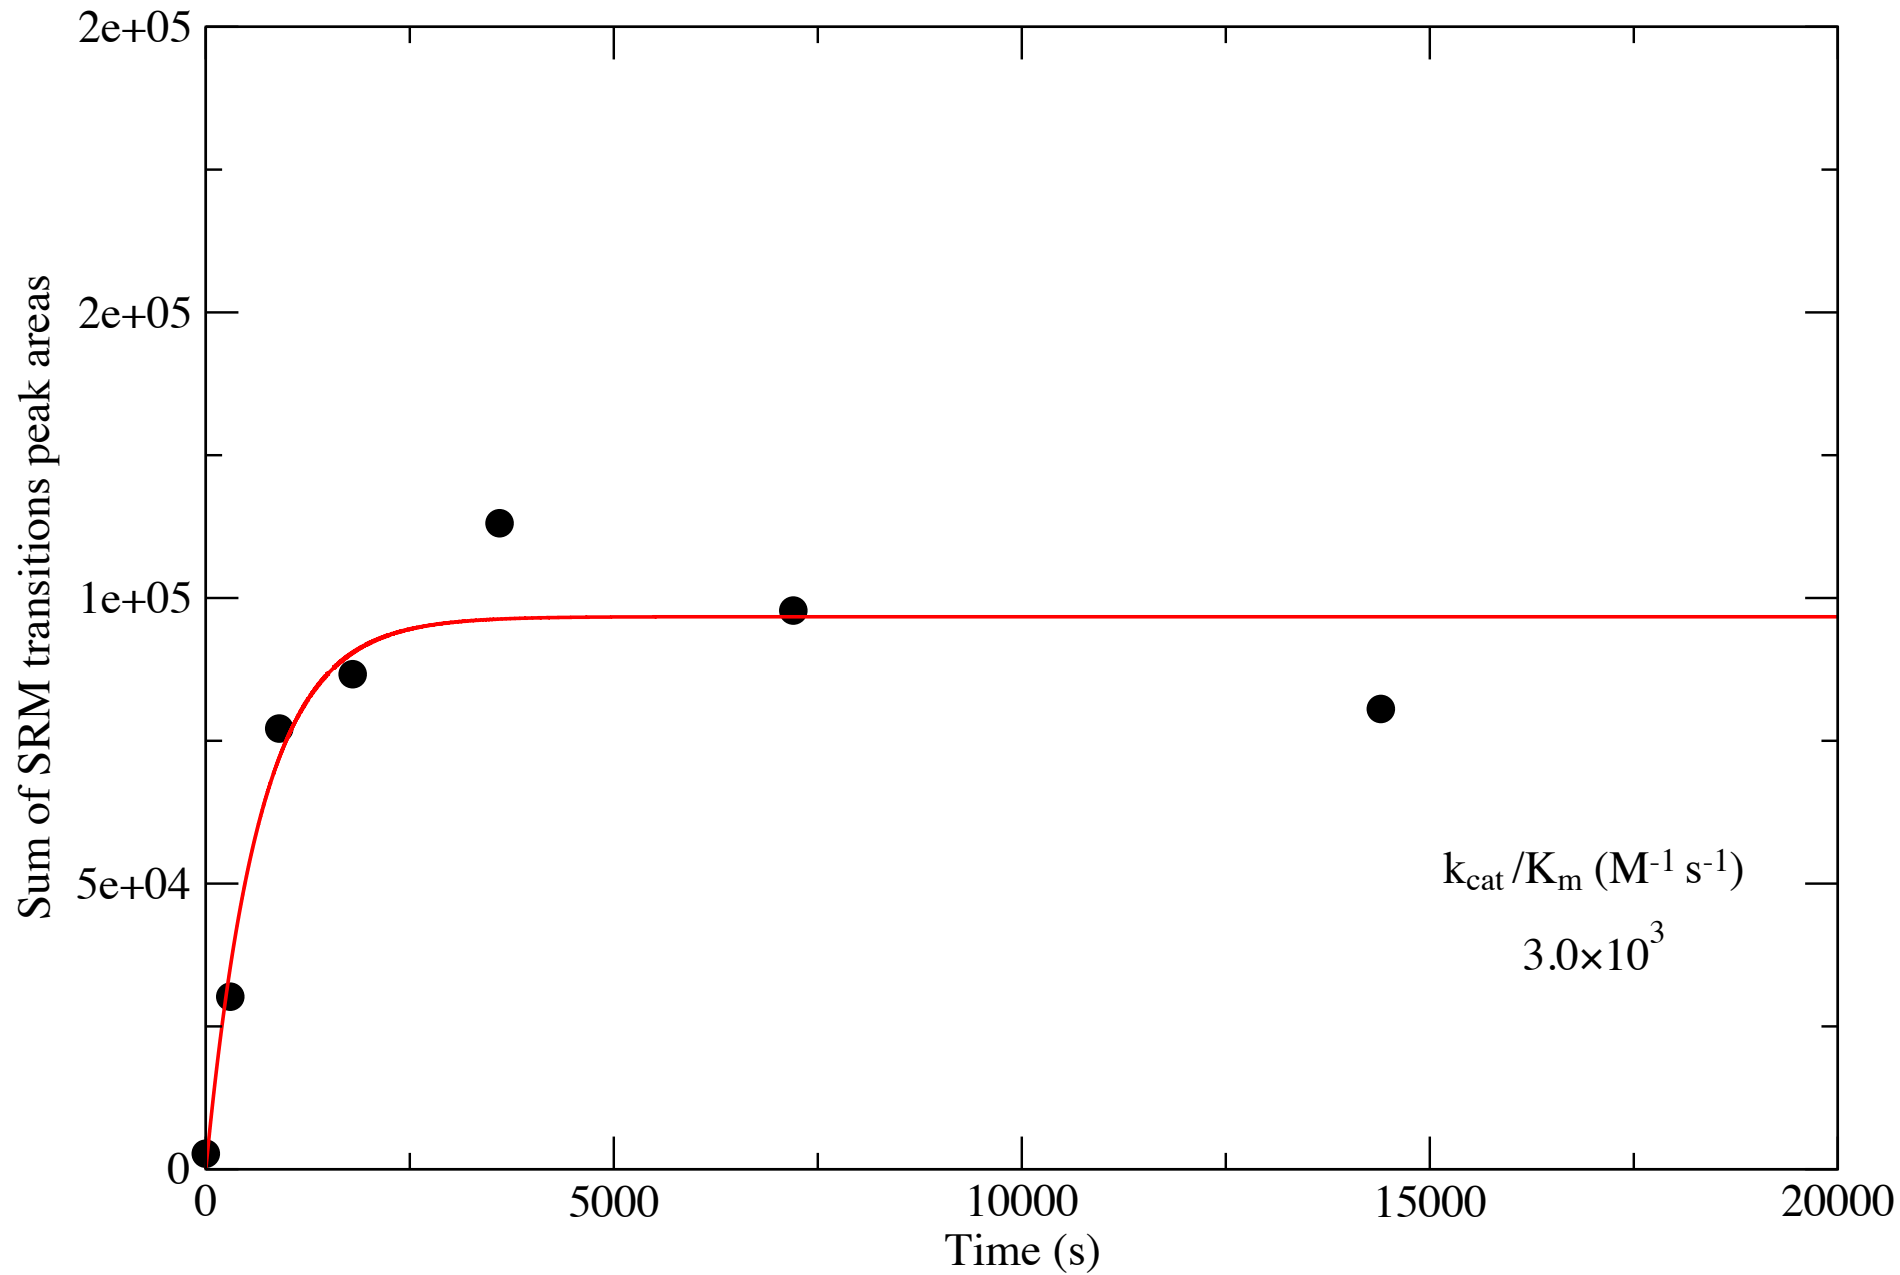

# RSRC1\_HUMAN (SFVQQTFR)

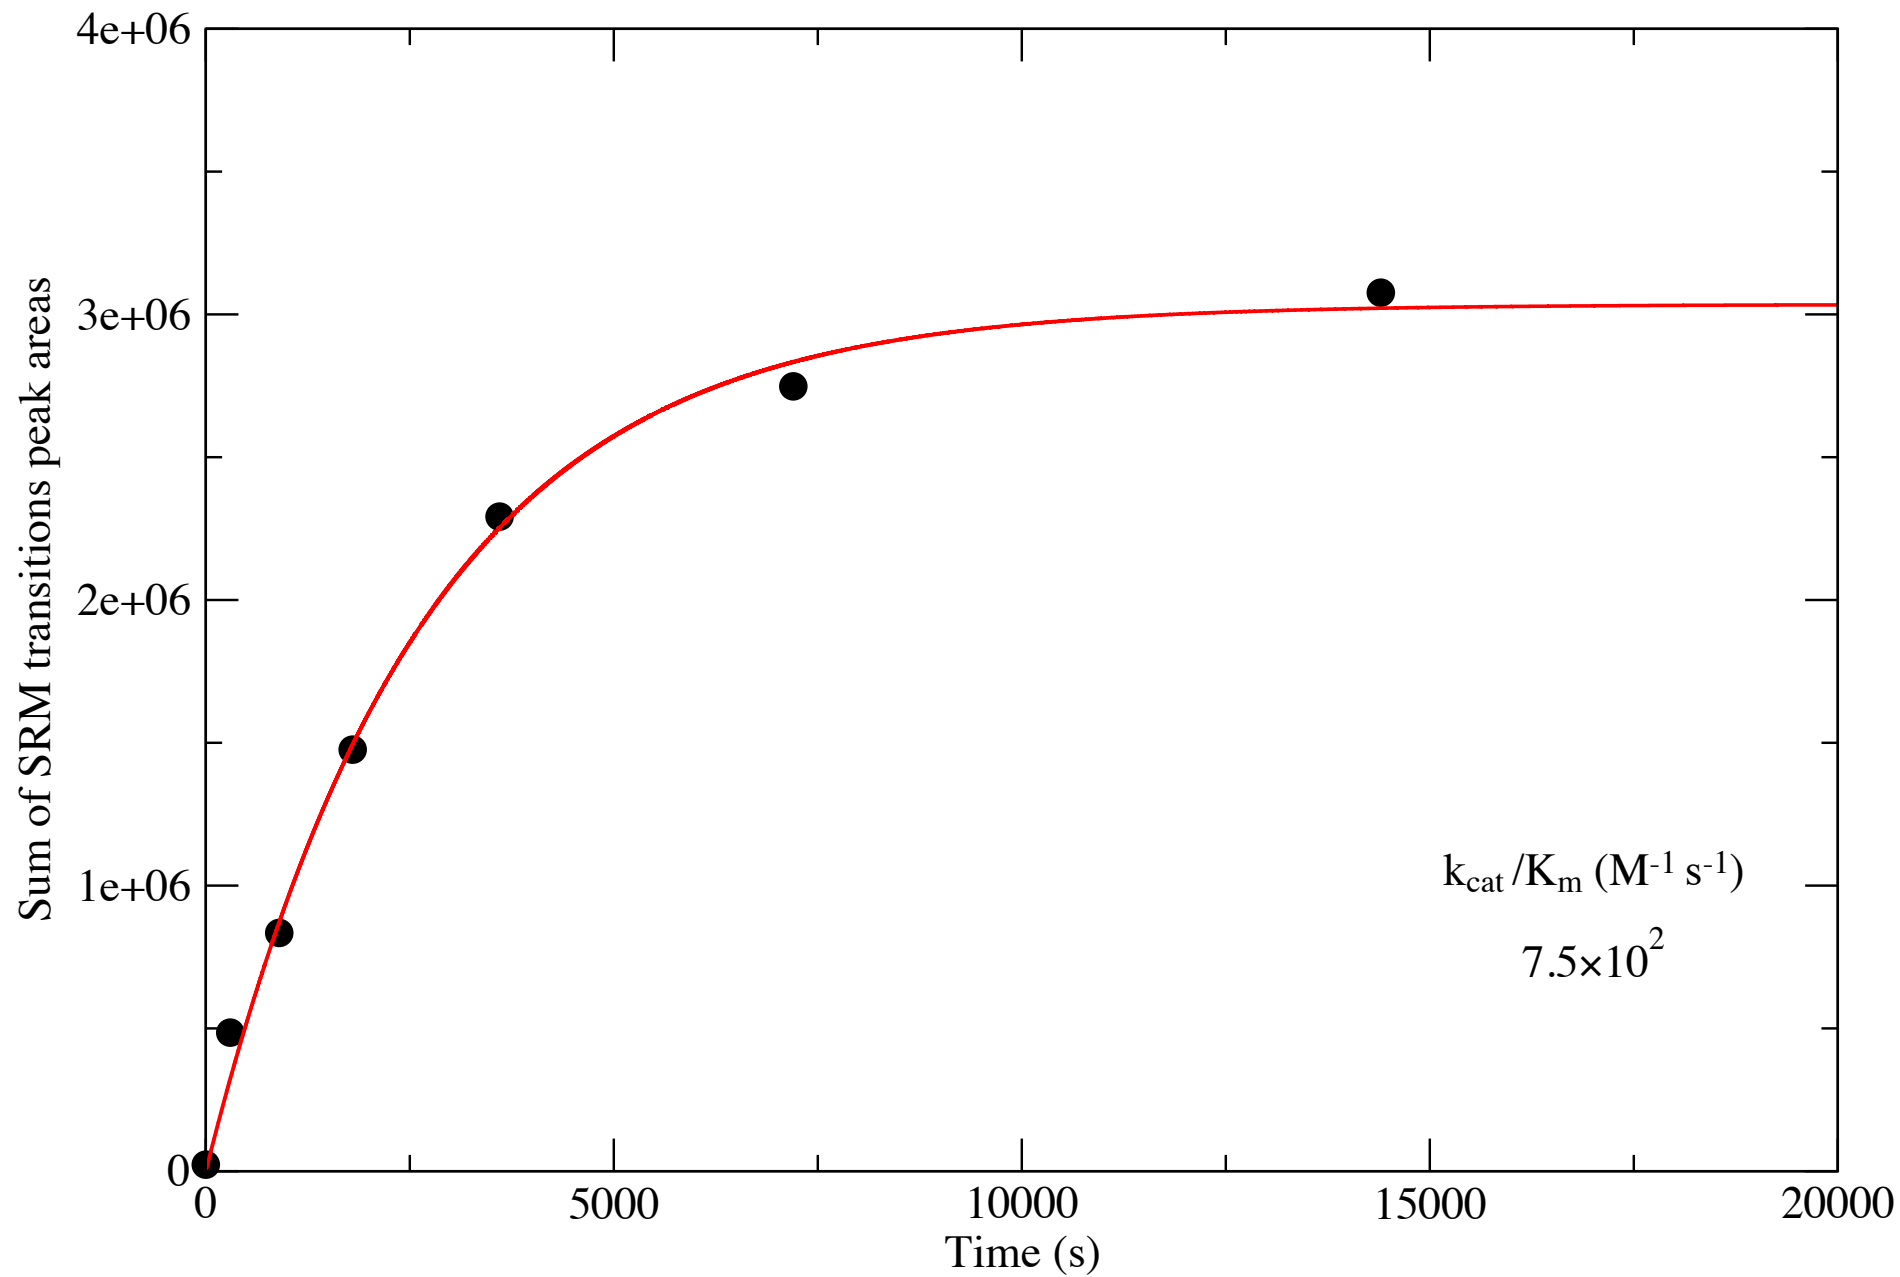

# RTN4\_HUMAN (YVTTDNLTK)

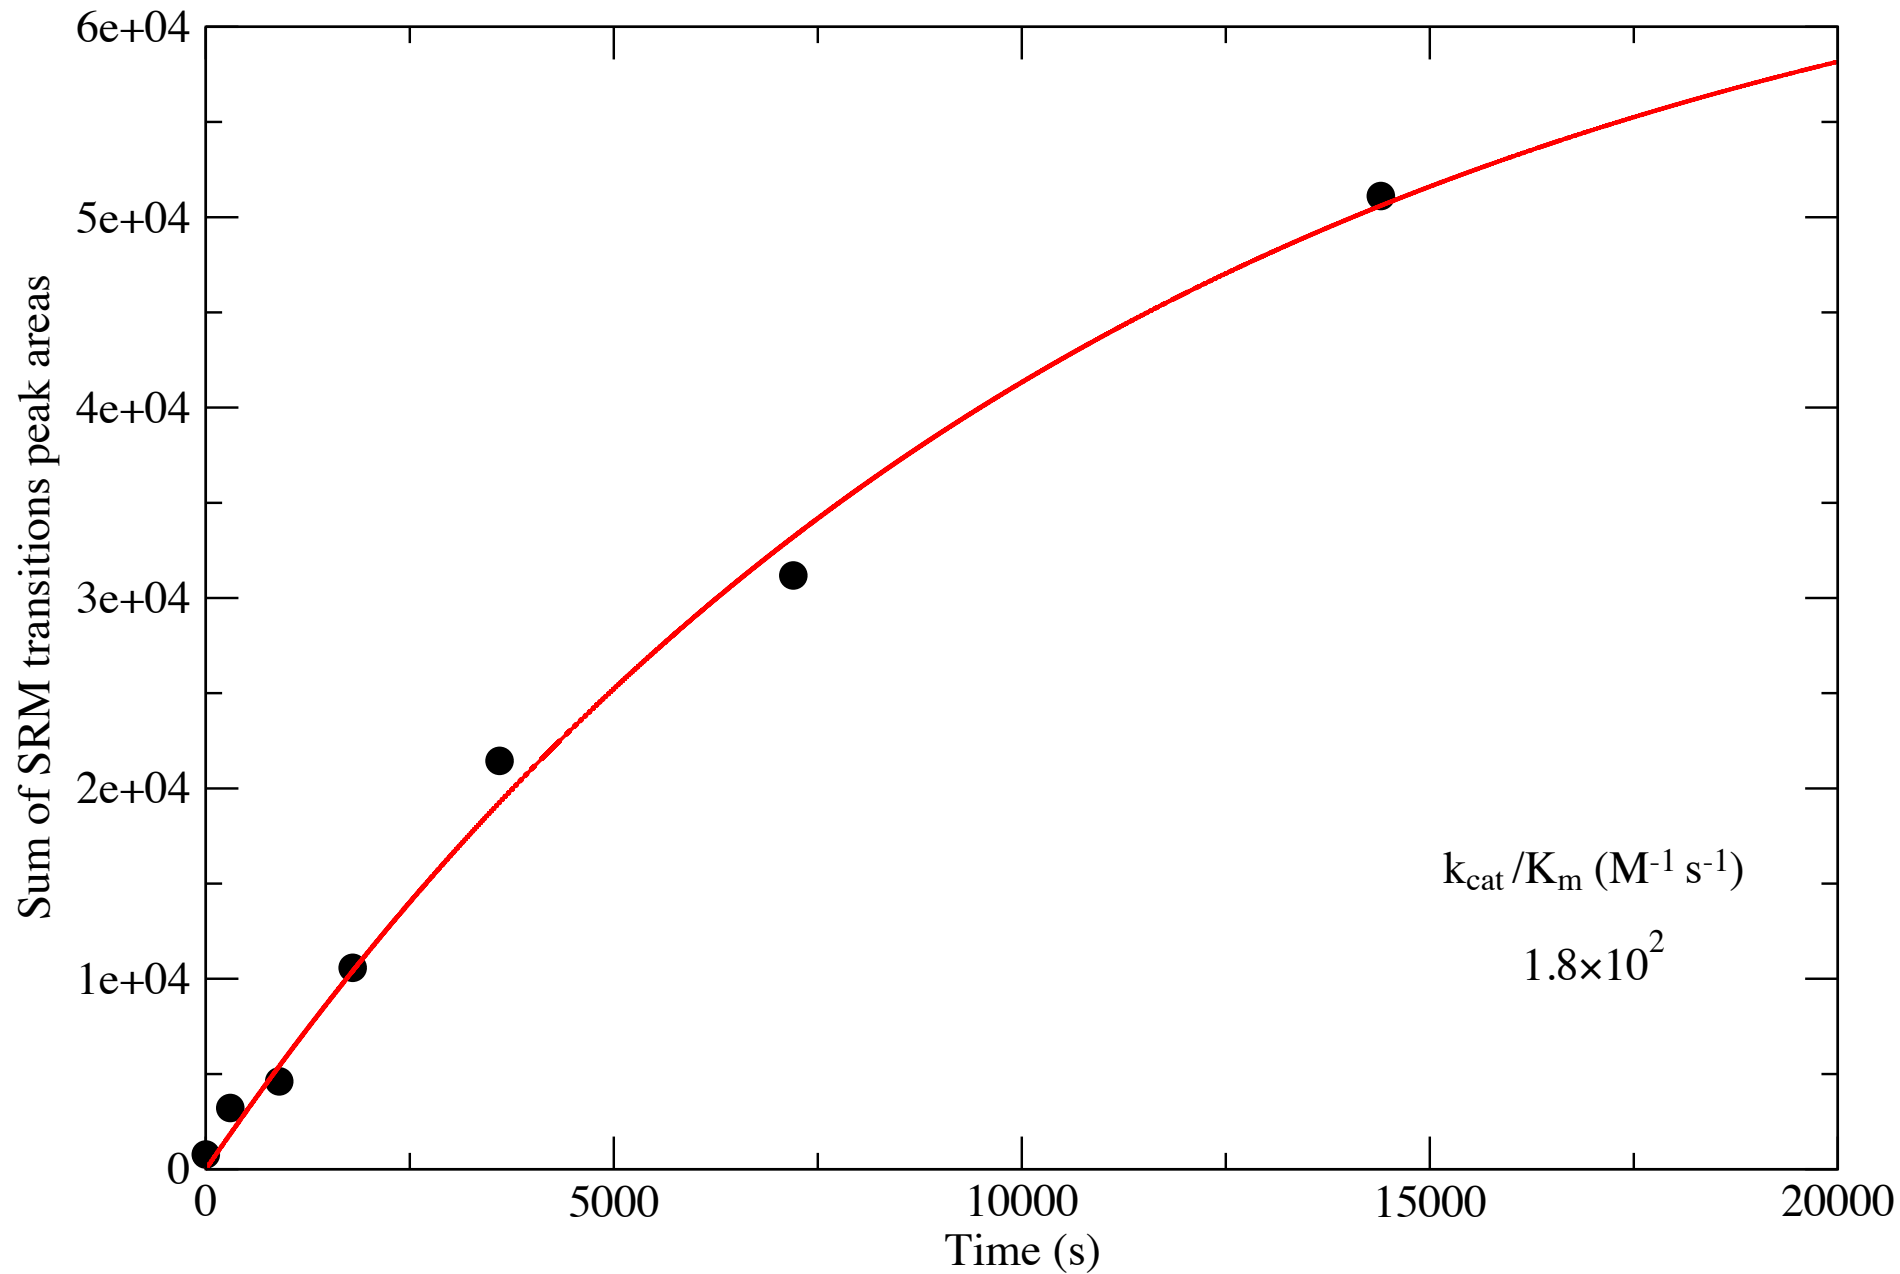

# SAFB2\_HUMAN (GLLDSFCDSK)

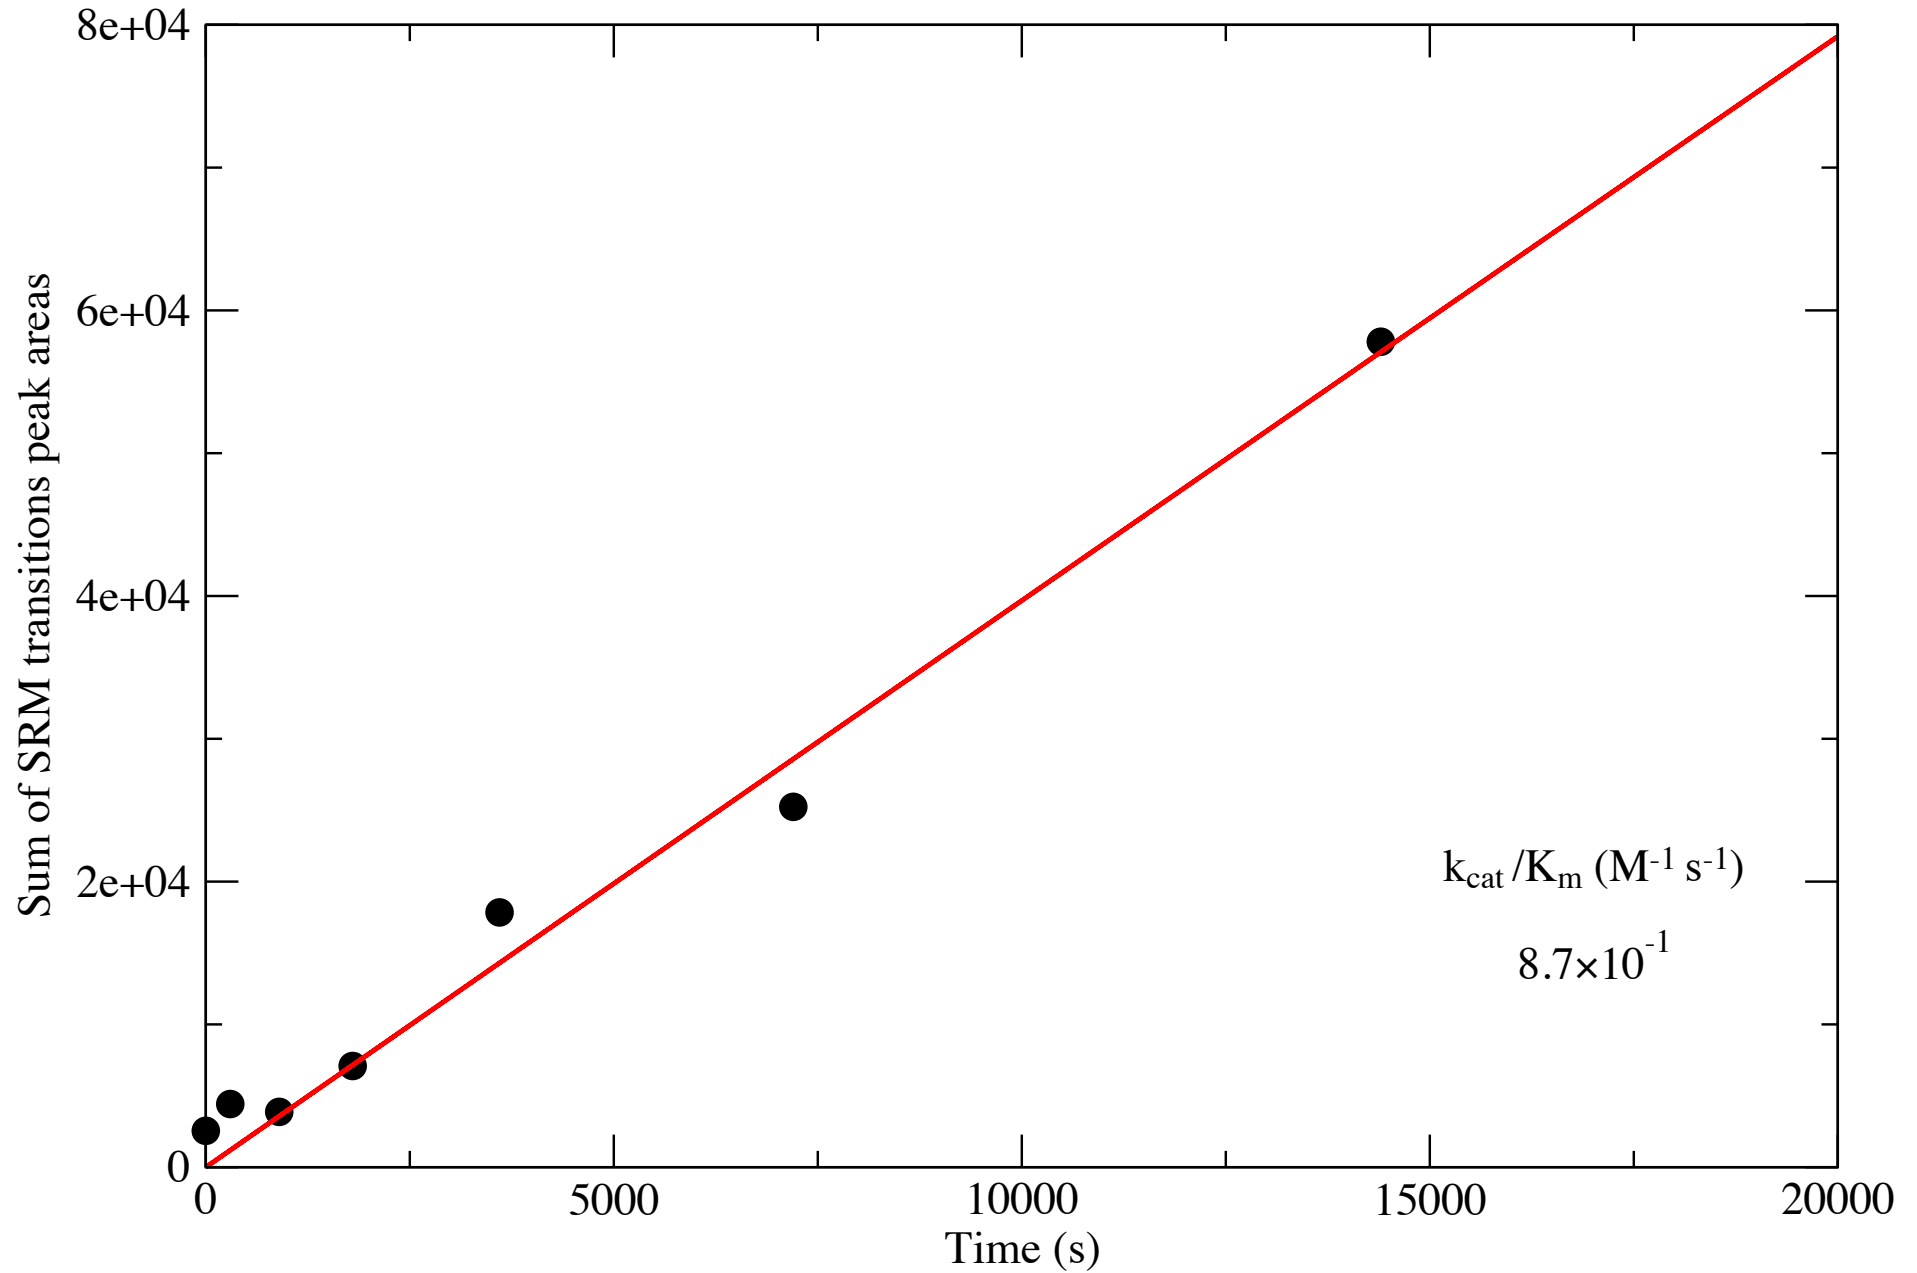

# SETX\_HUMAN (SVSRPQLESLSGTK)

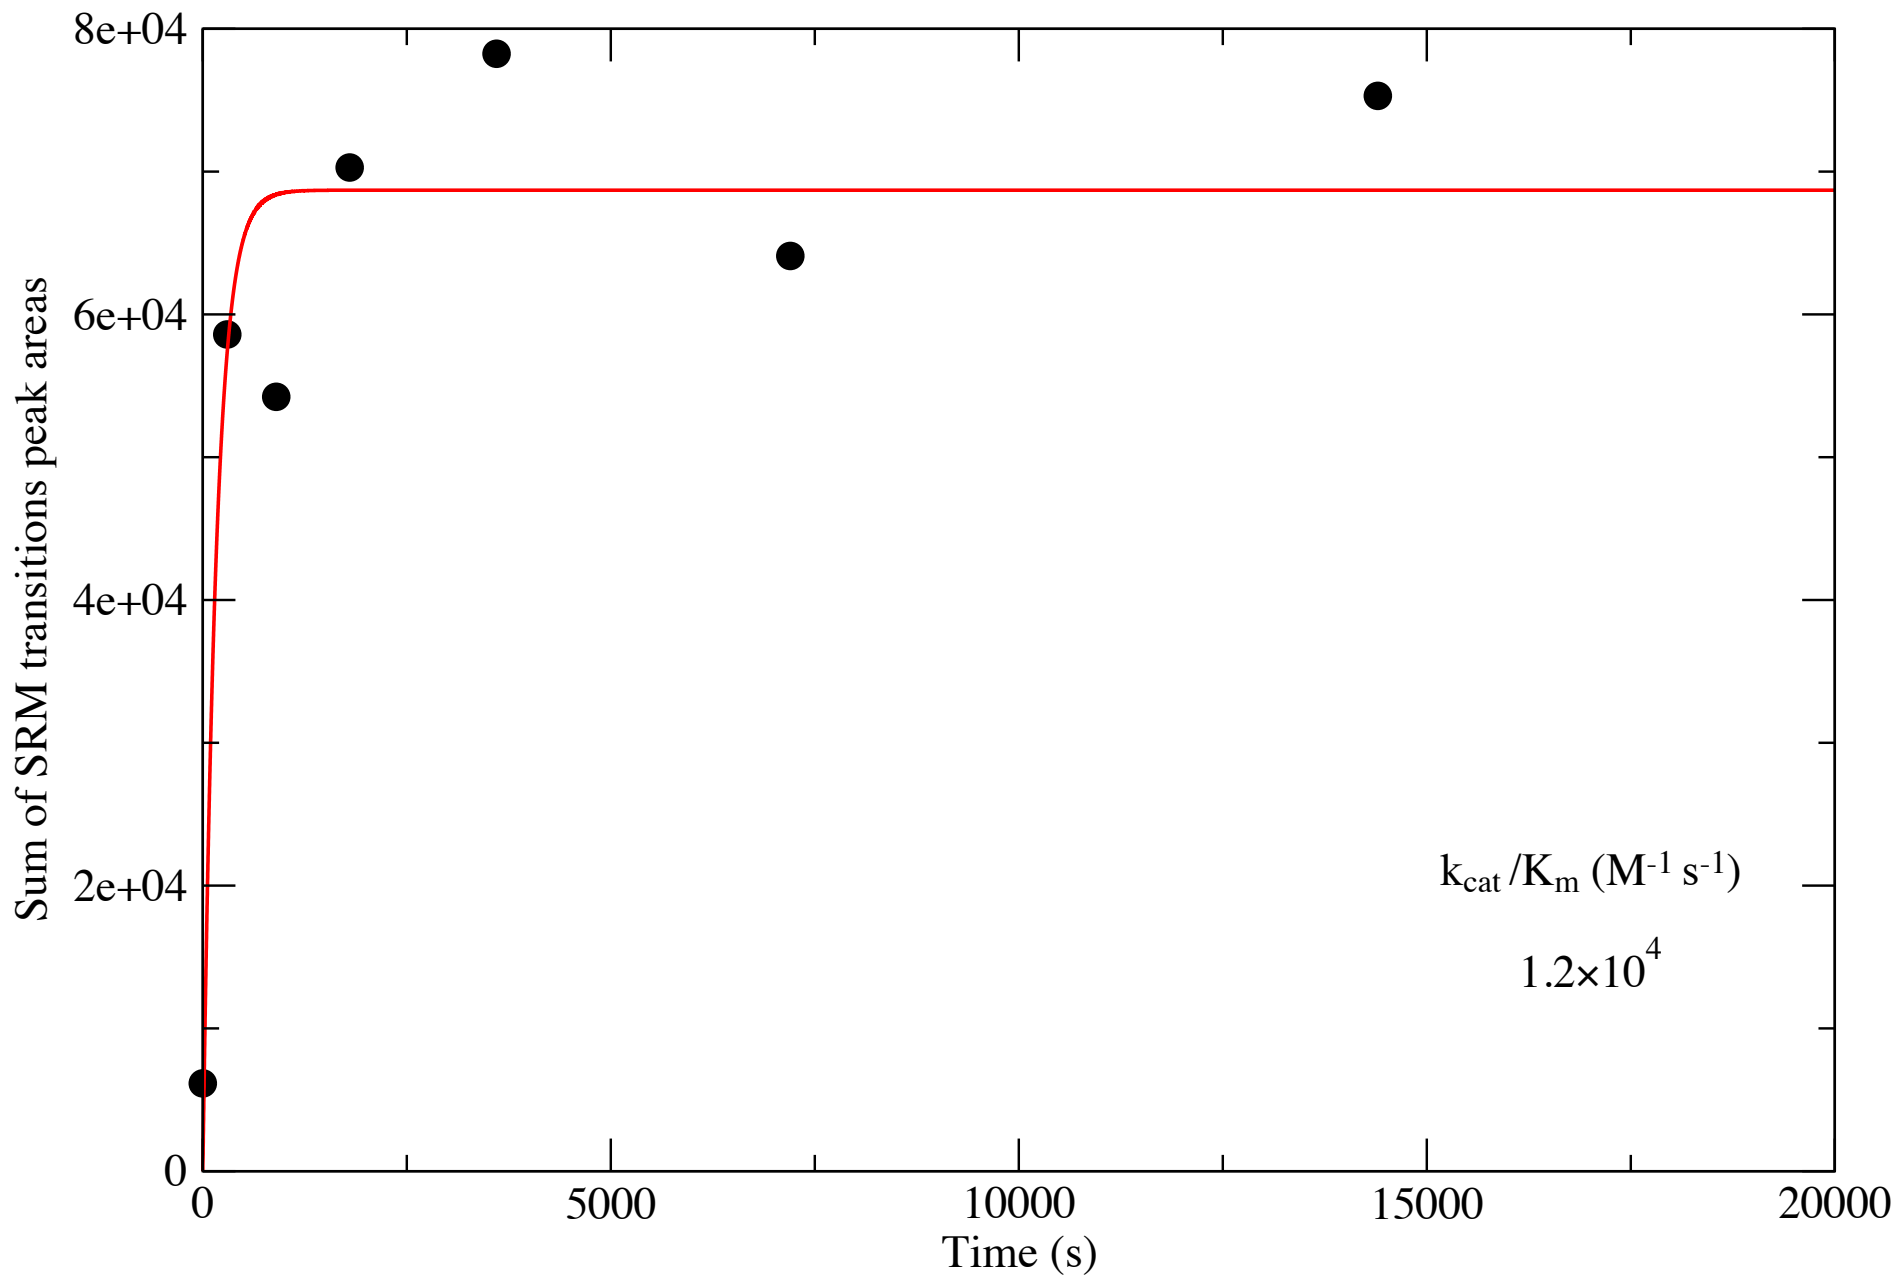

# SF3B1\_HUMAN (STGYDQEIYGGSDSR)

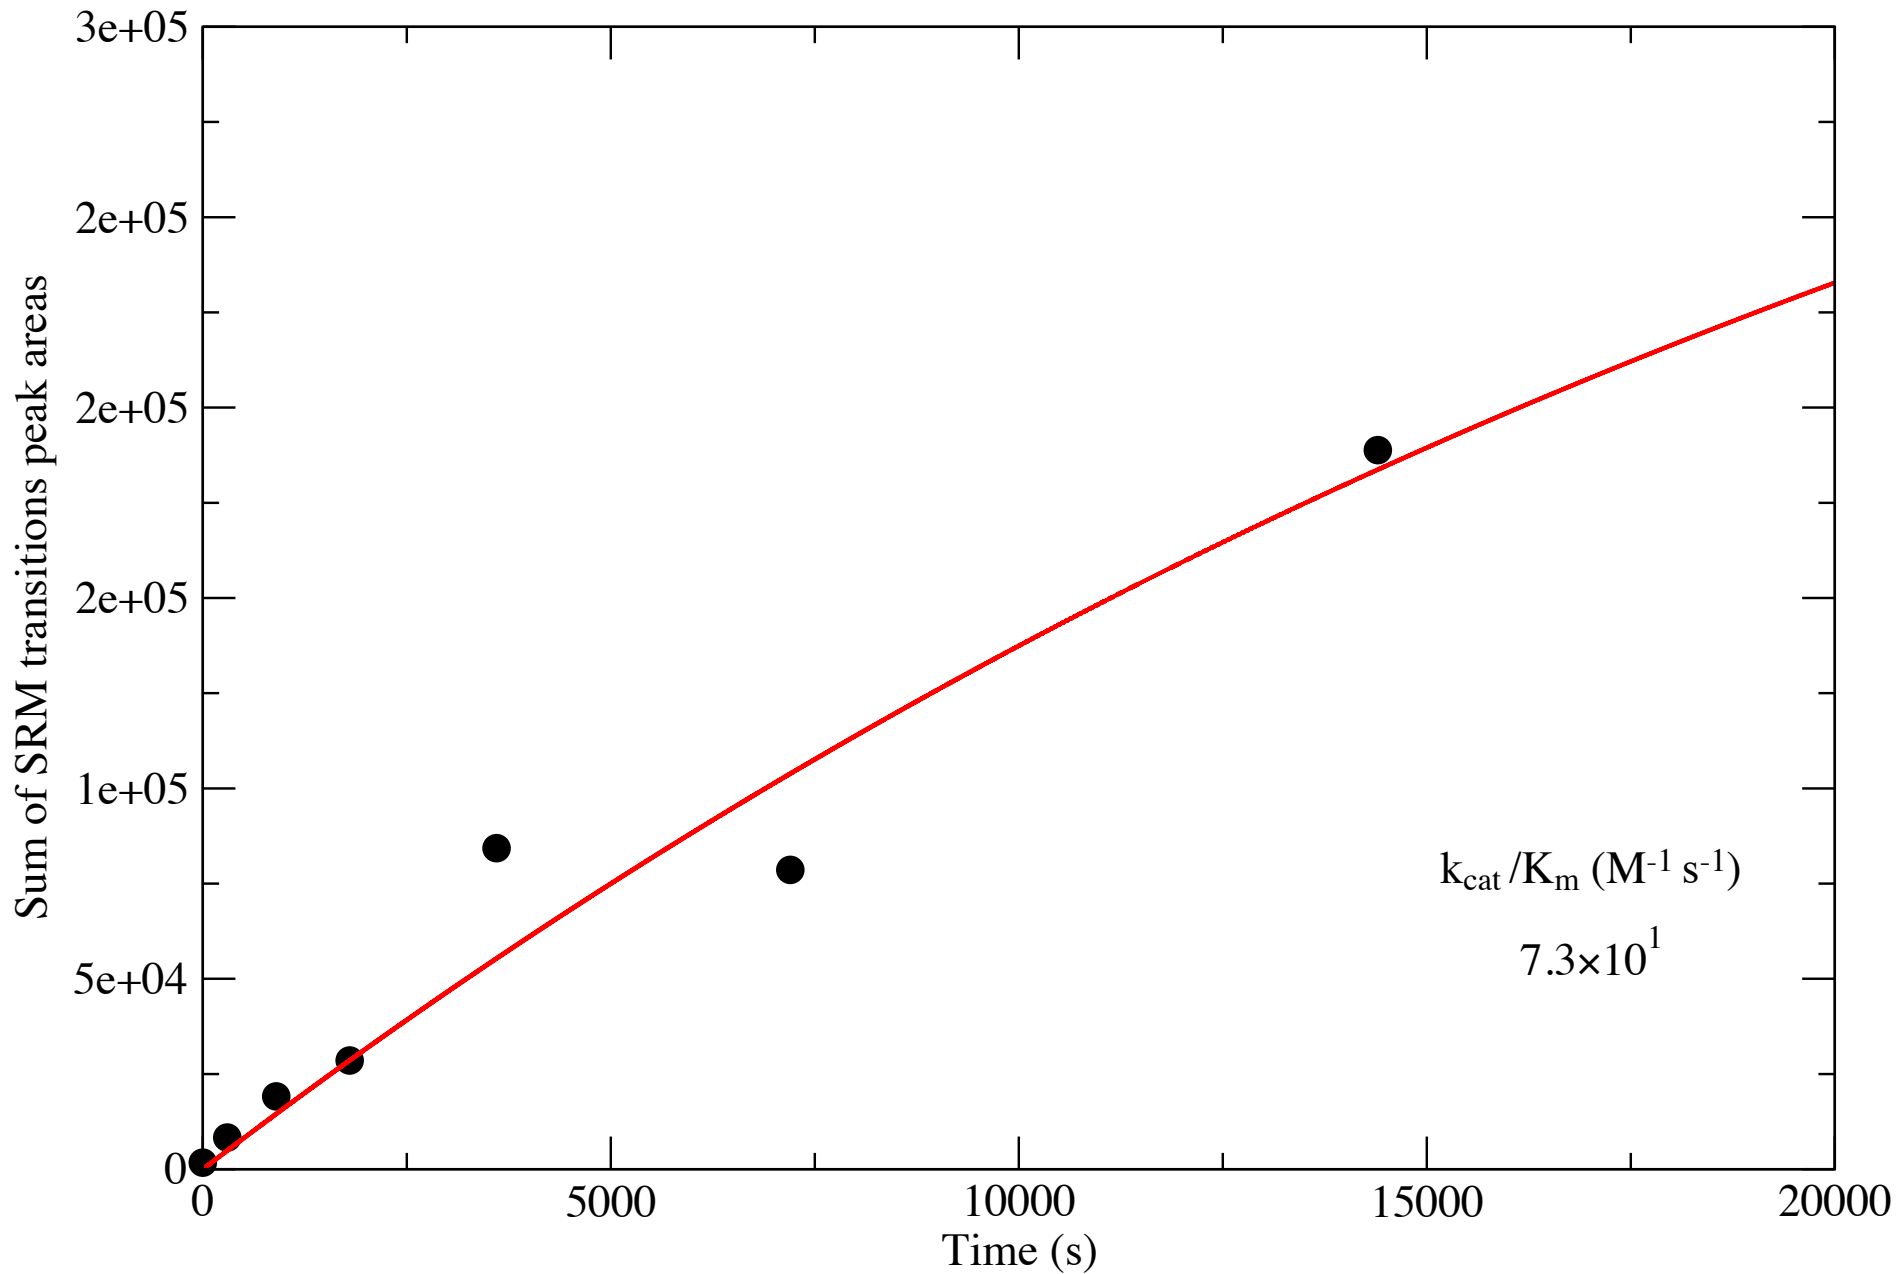



# SF3B2\_HUMAN (GSETPQLFTVLPEKR)

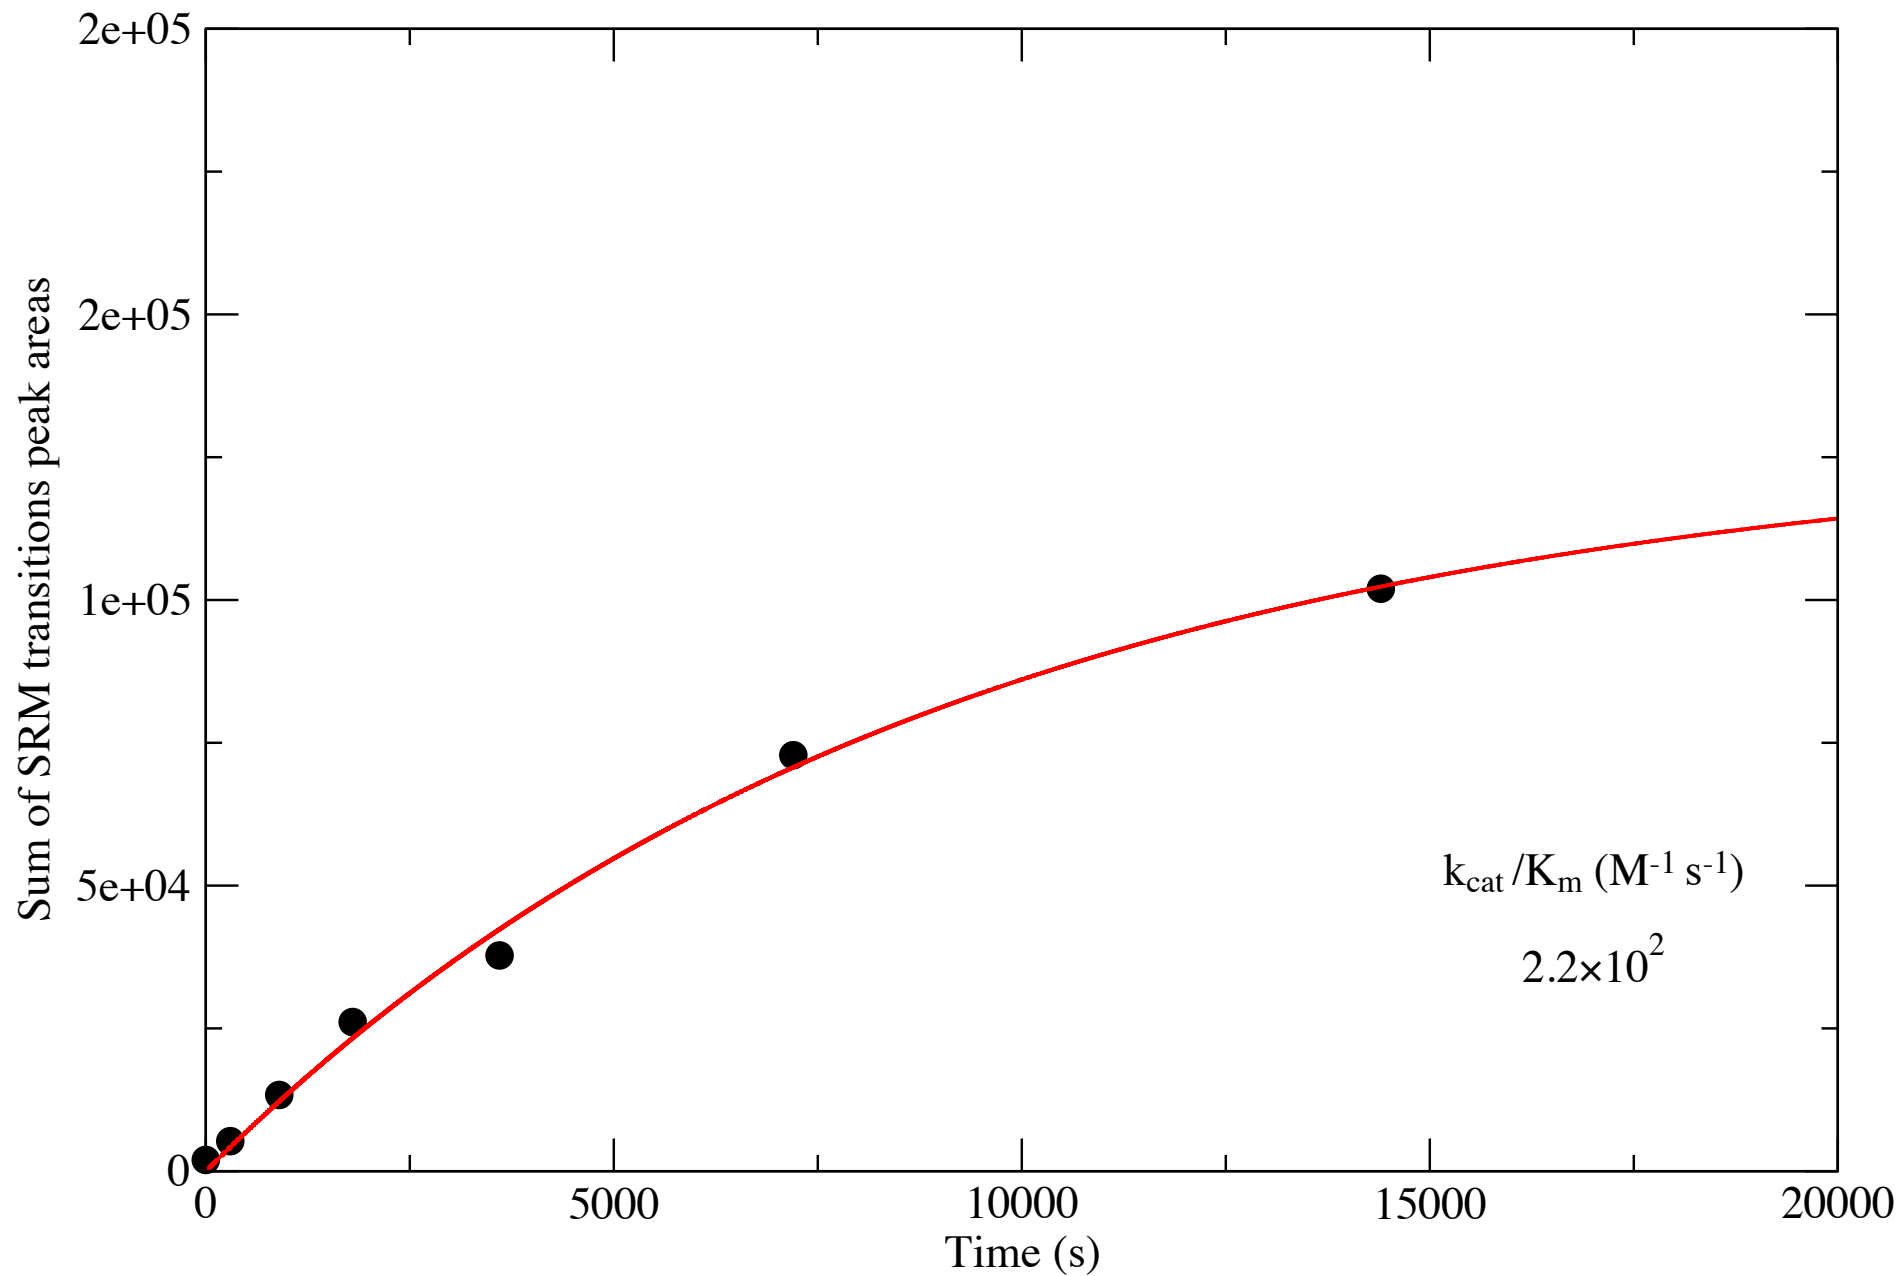

# SH3K1\_HUMAN (FLPVEK)

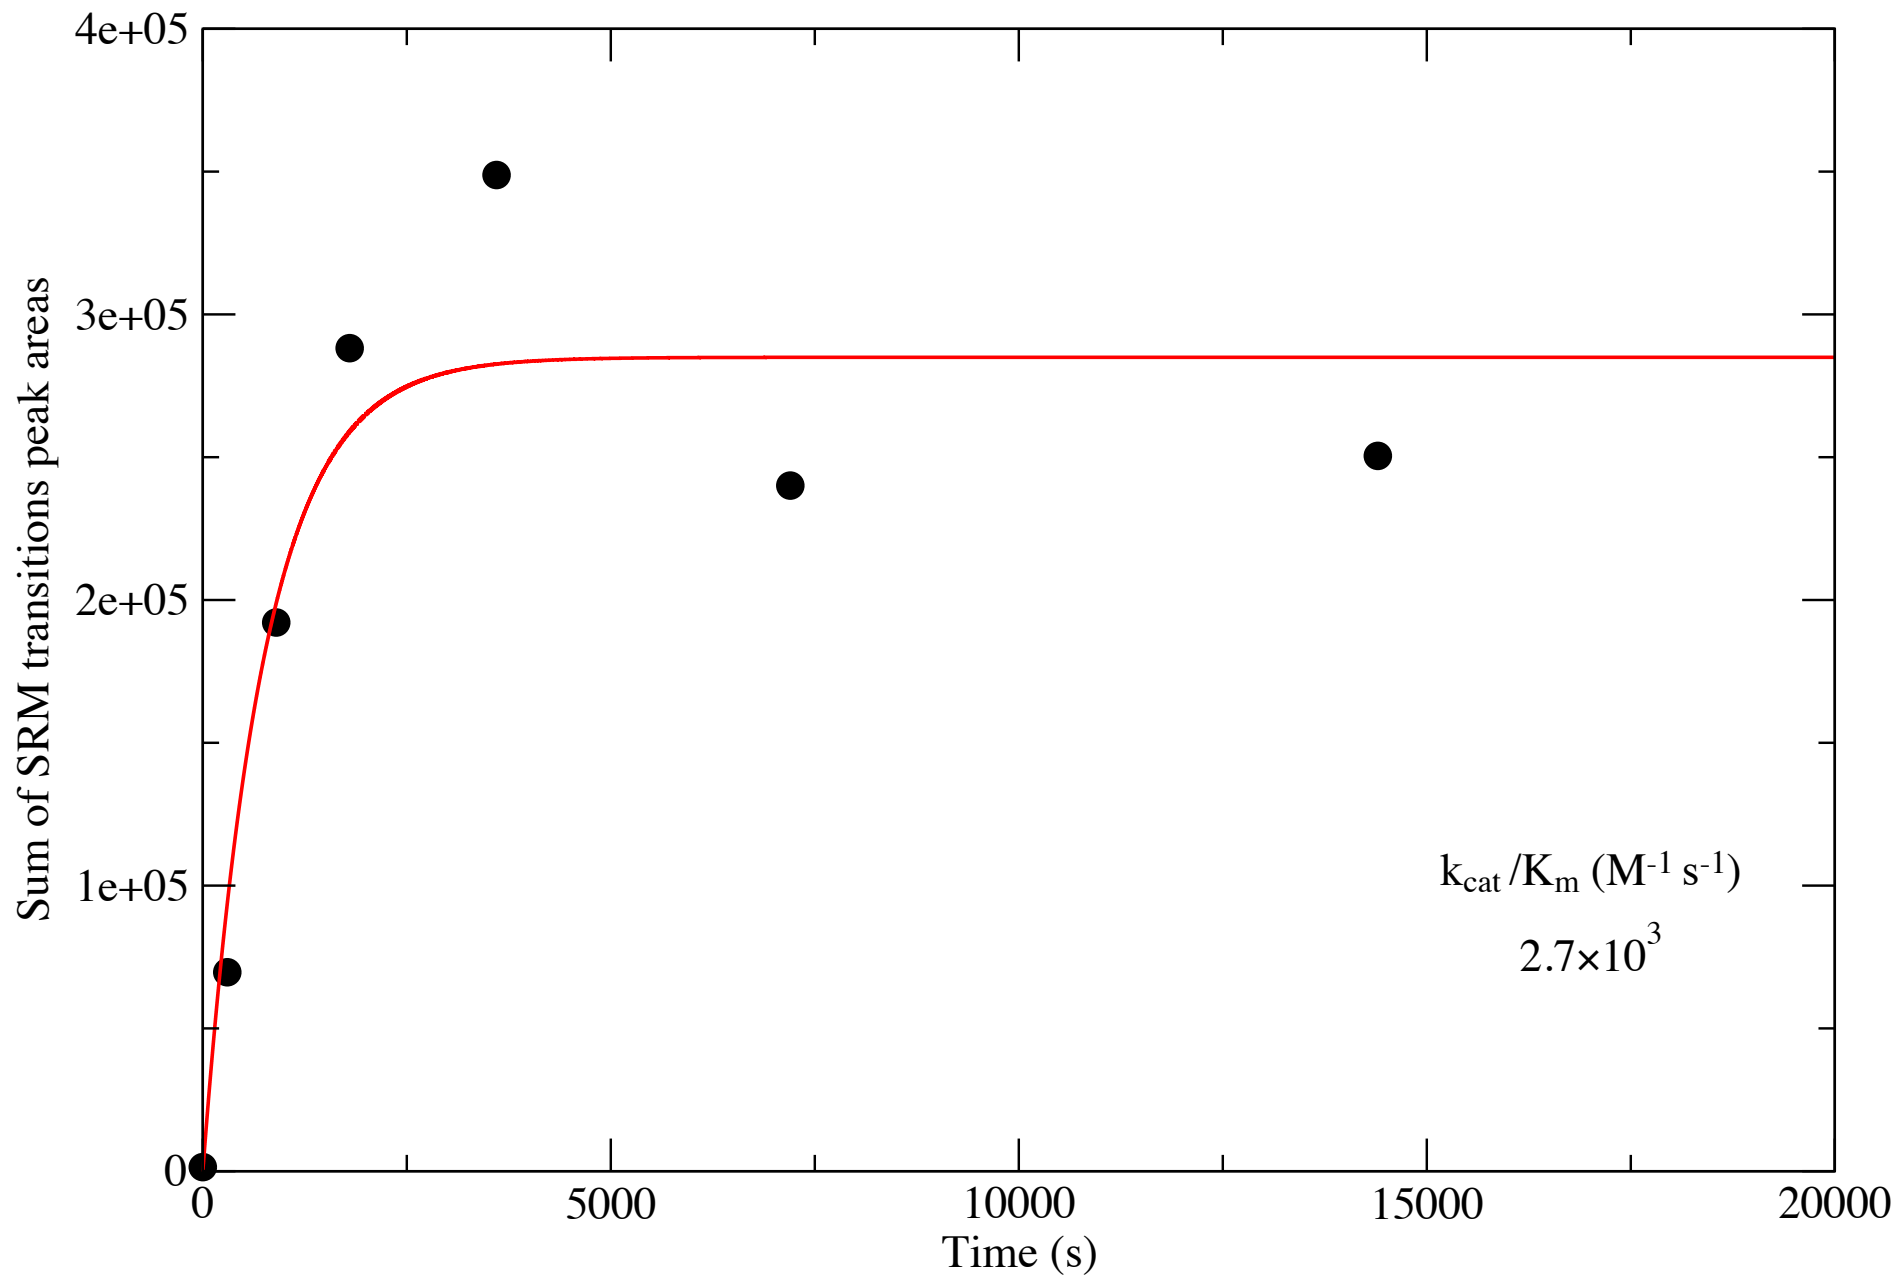

# SHOT1\_HUMAN (GAAETCVSVQCQK)

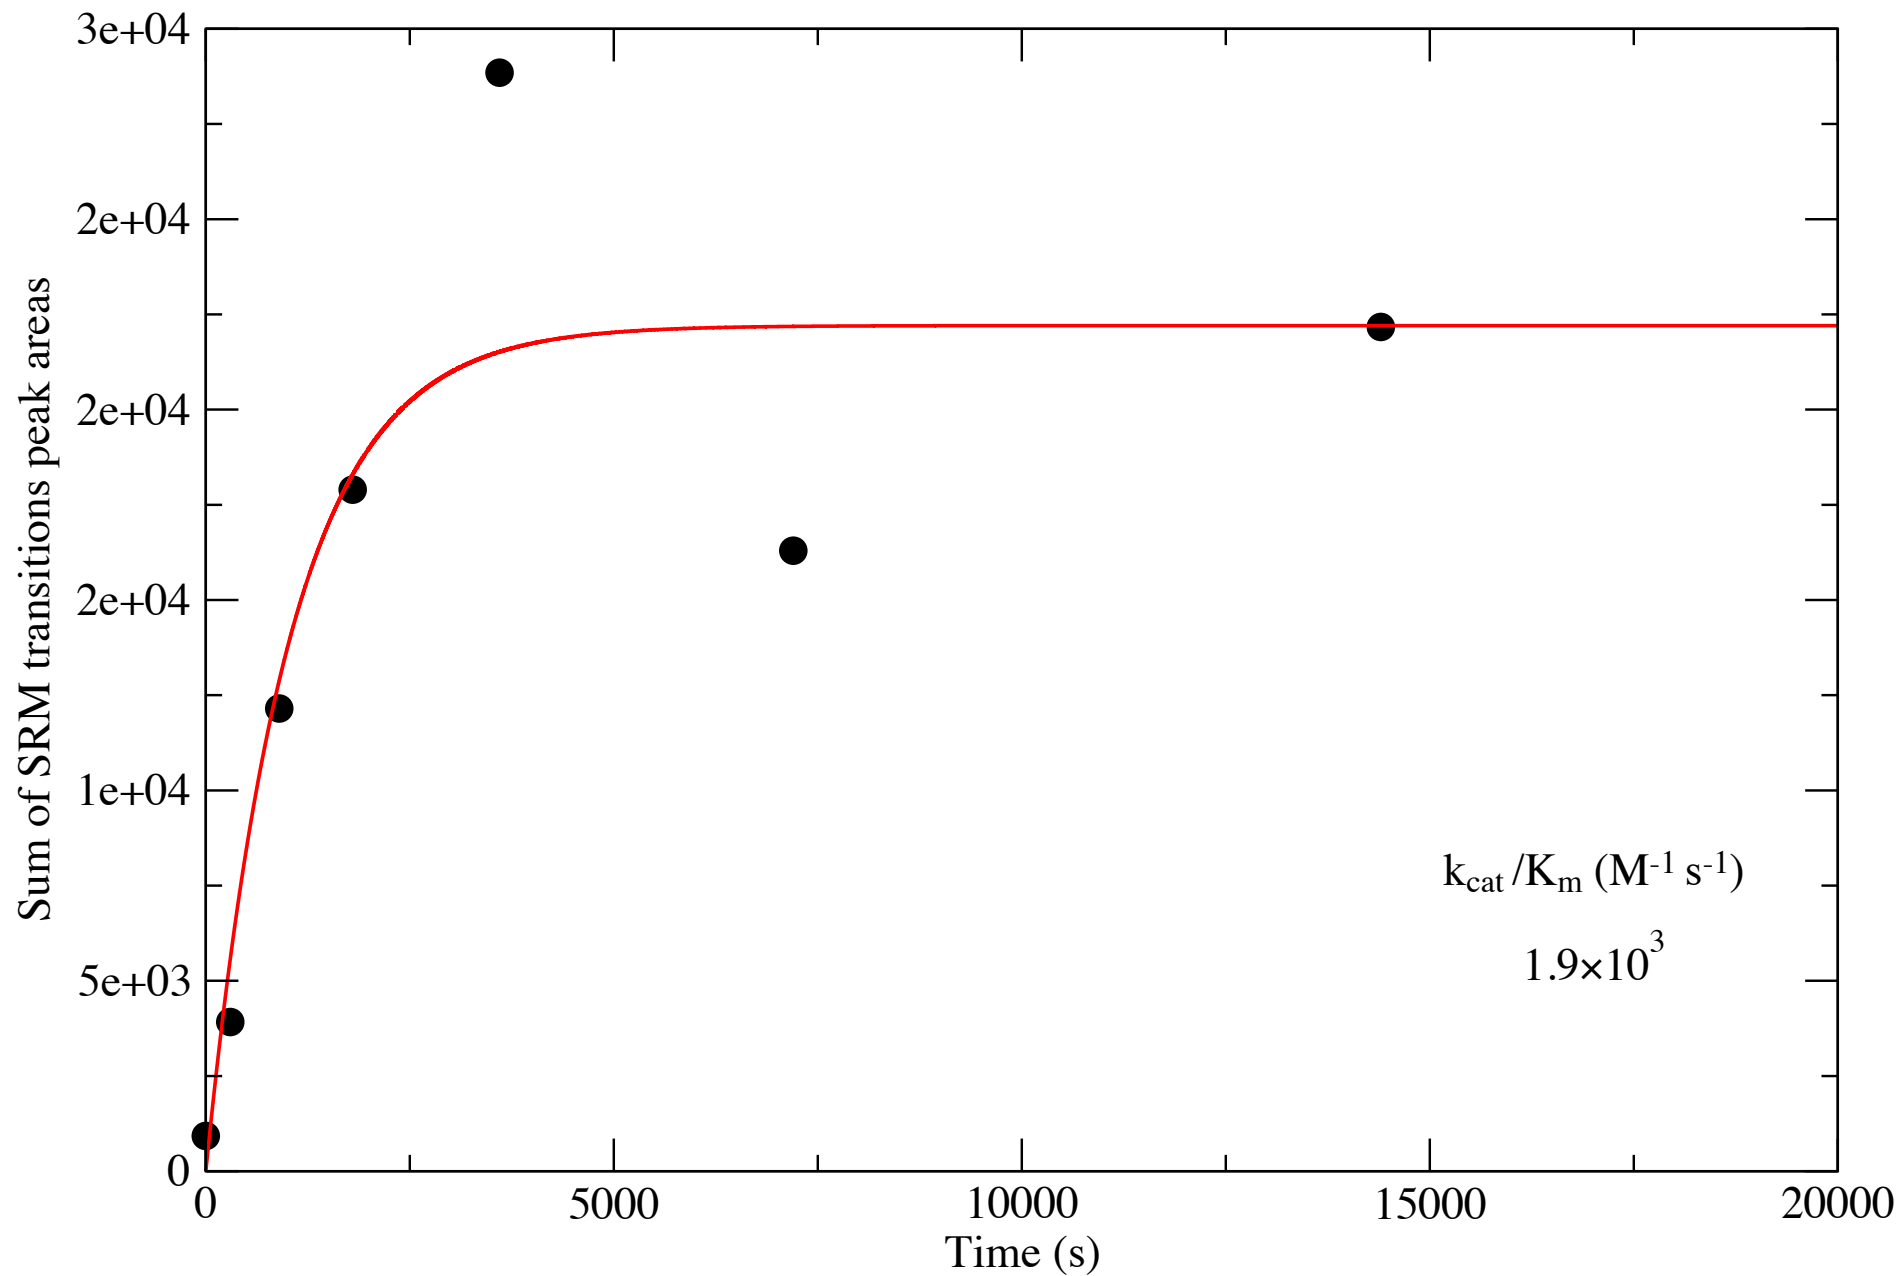

# SLU7\_HUMAN (AVNAAPLSGSK)

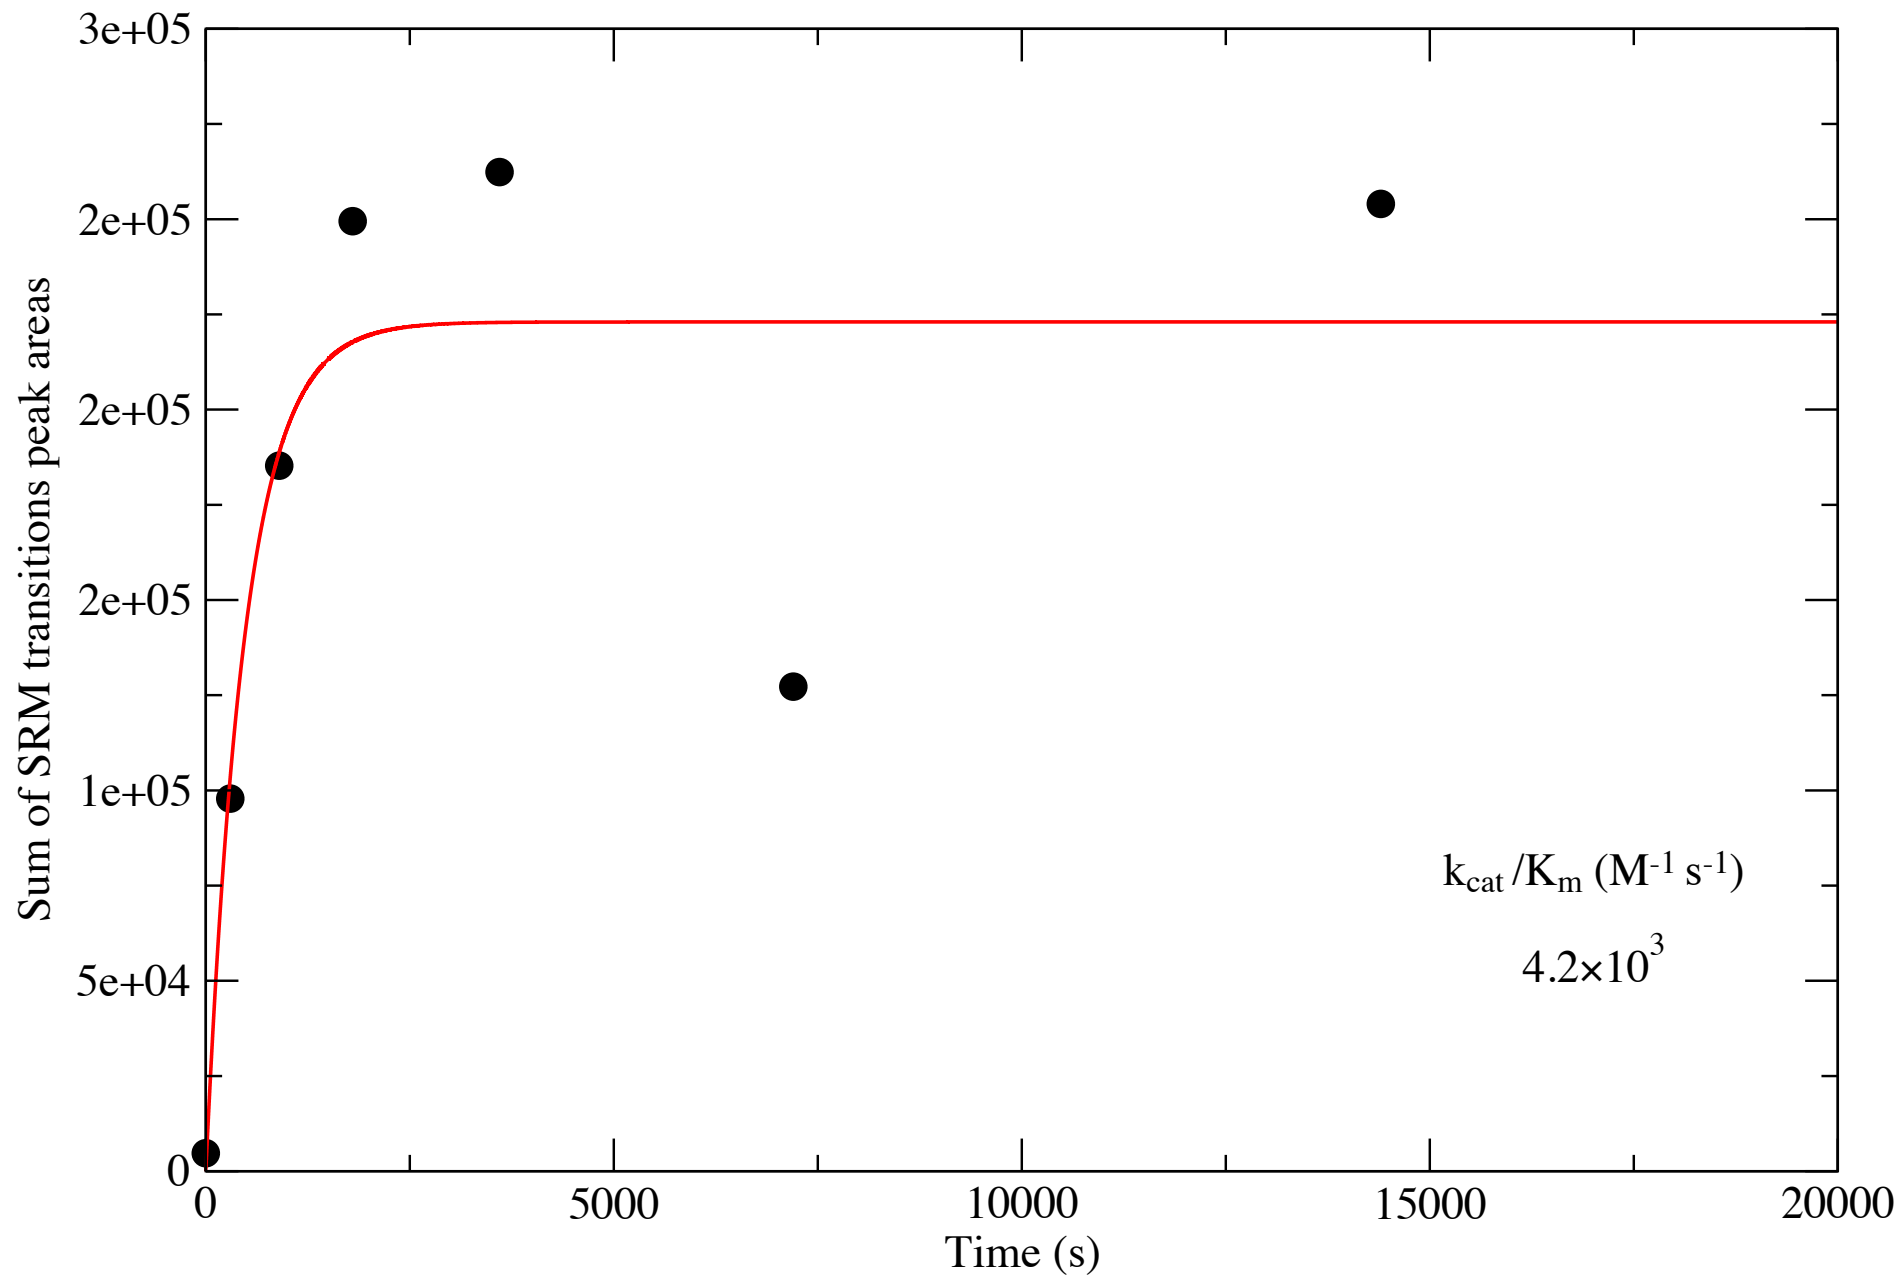

# SON\_HUMAN (SFLKFDSEPSA VALELPTR)

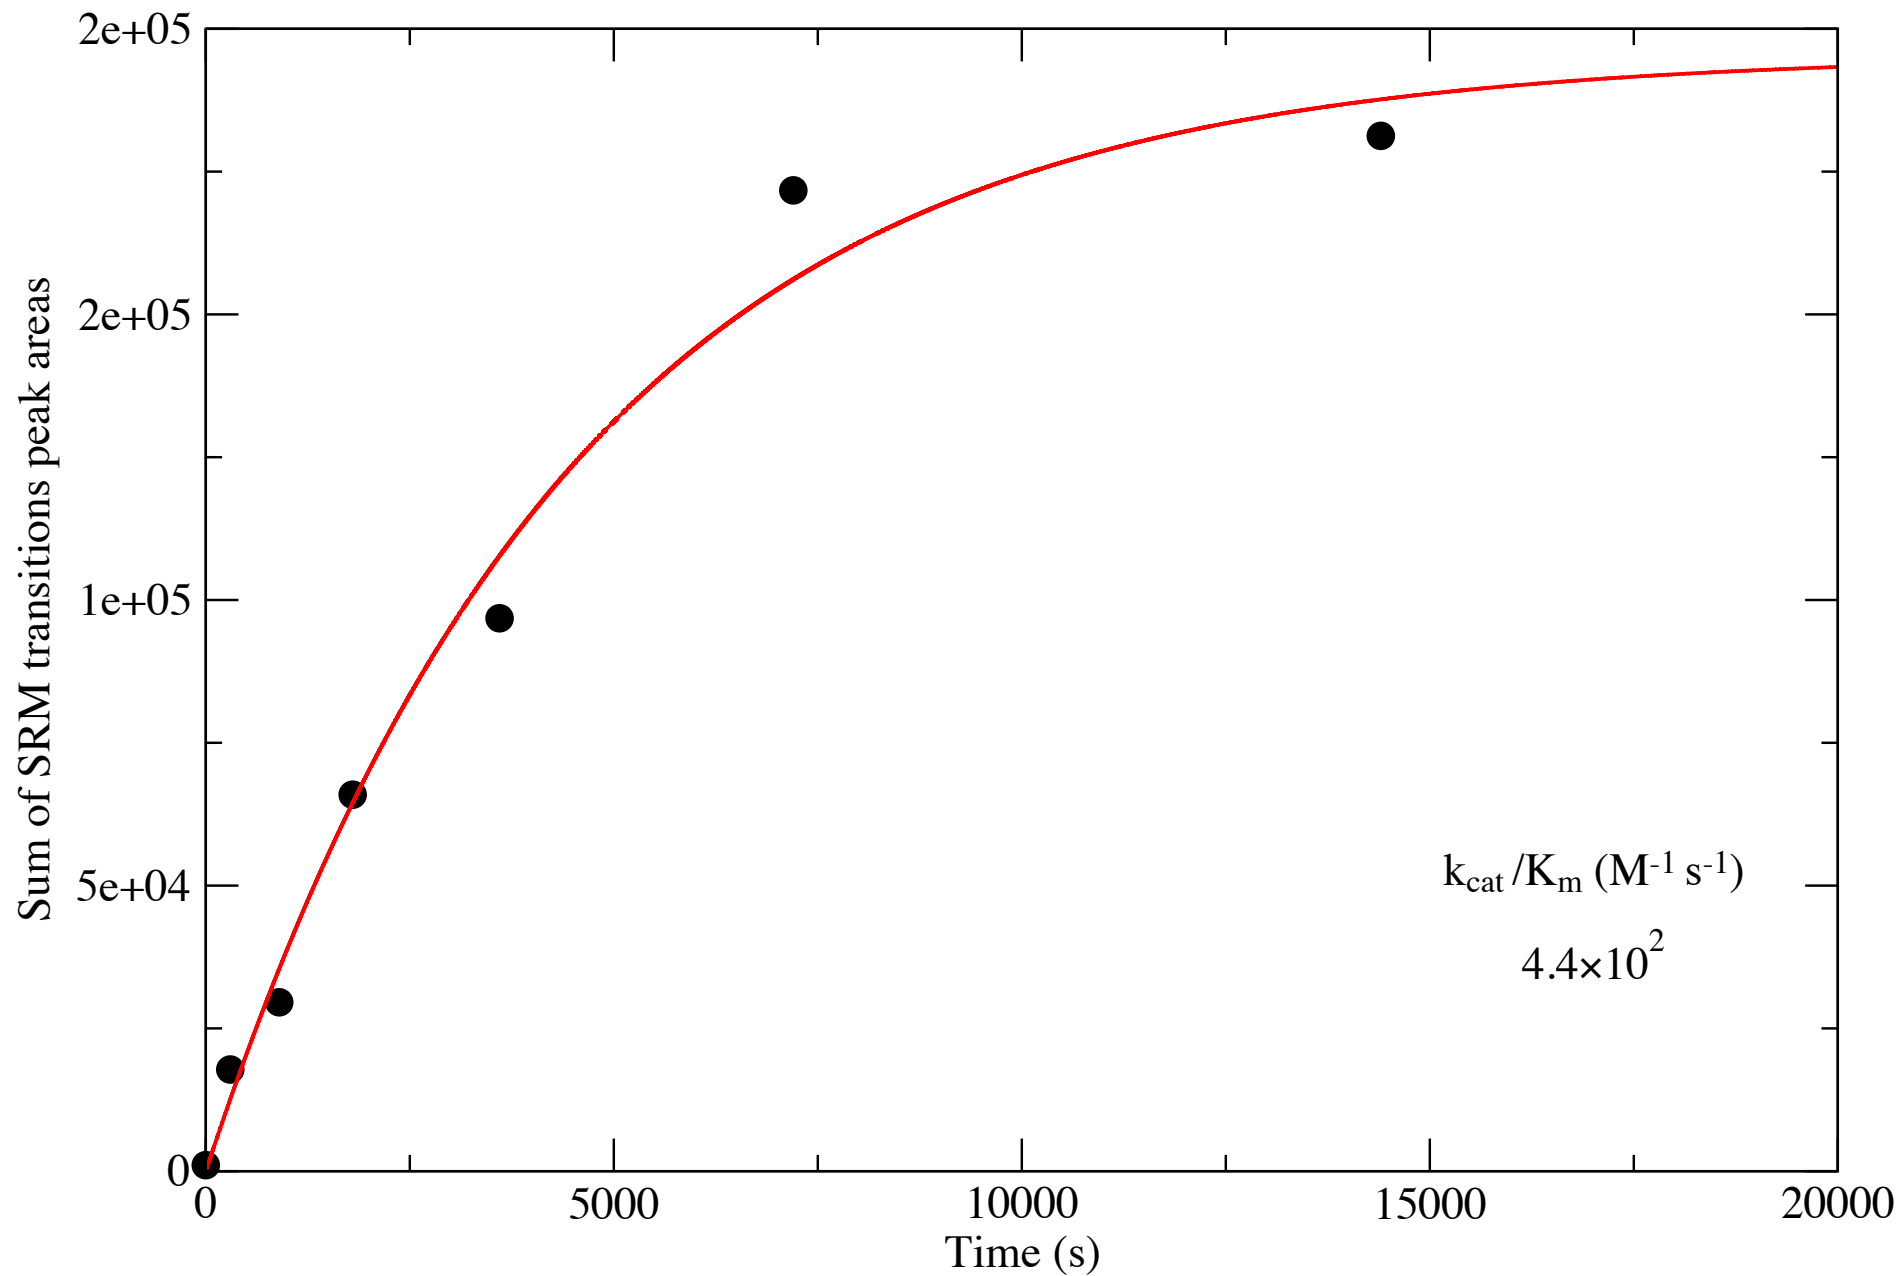

# SPB1\_HUMAN (GISDSDSSTSSEEEEEESWEPLRGK)

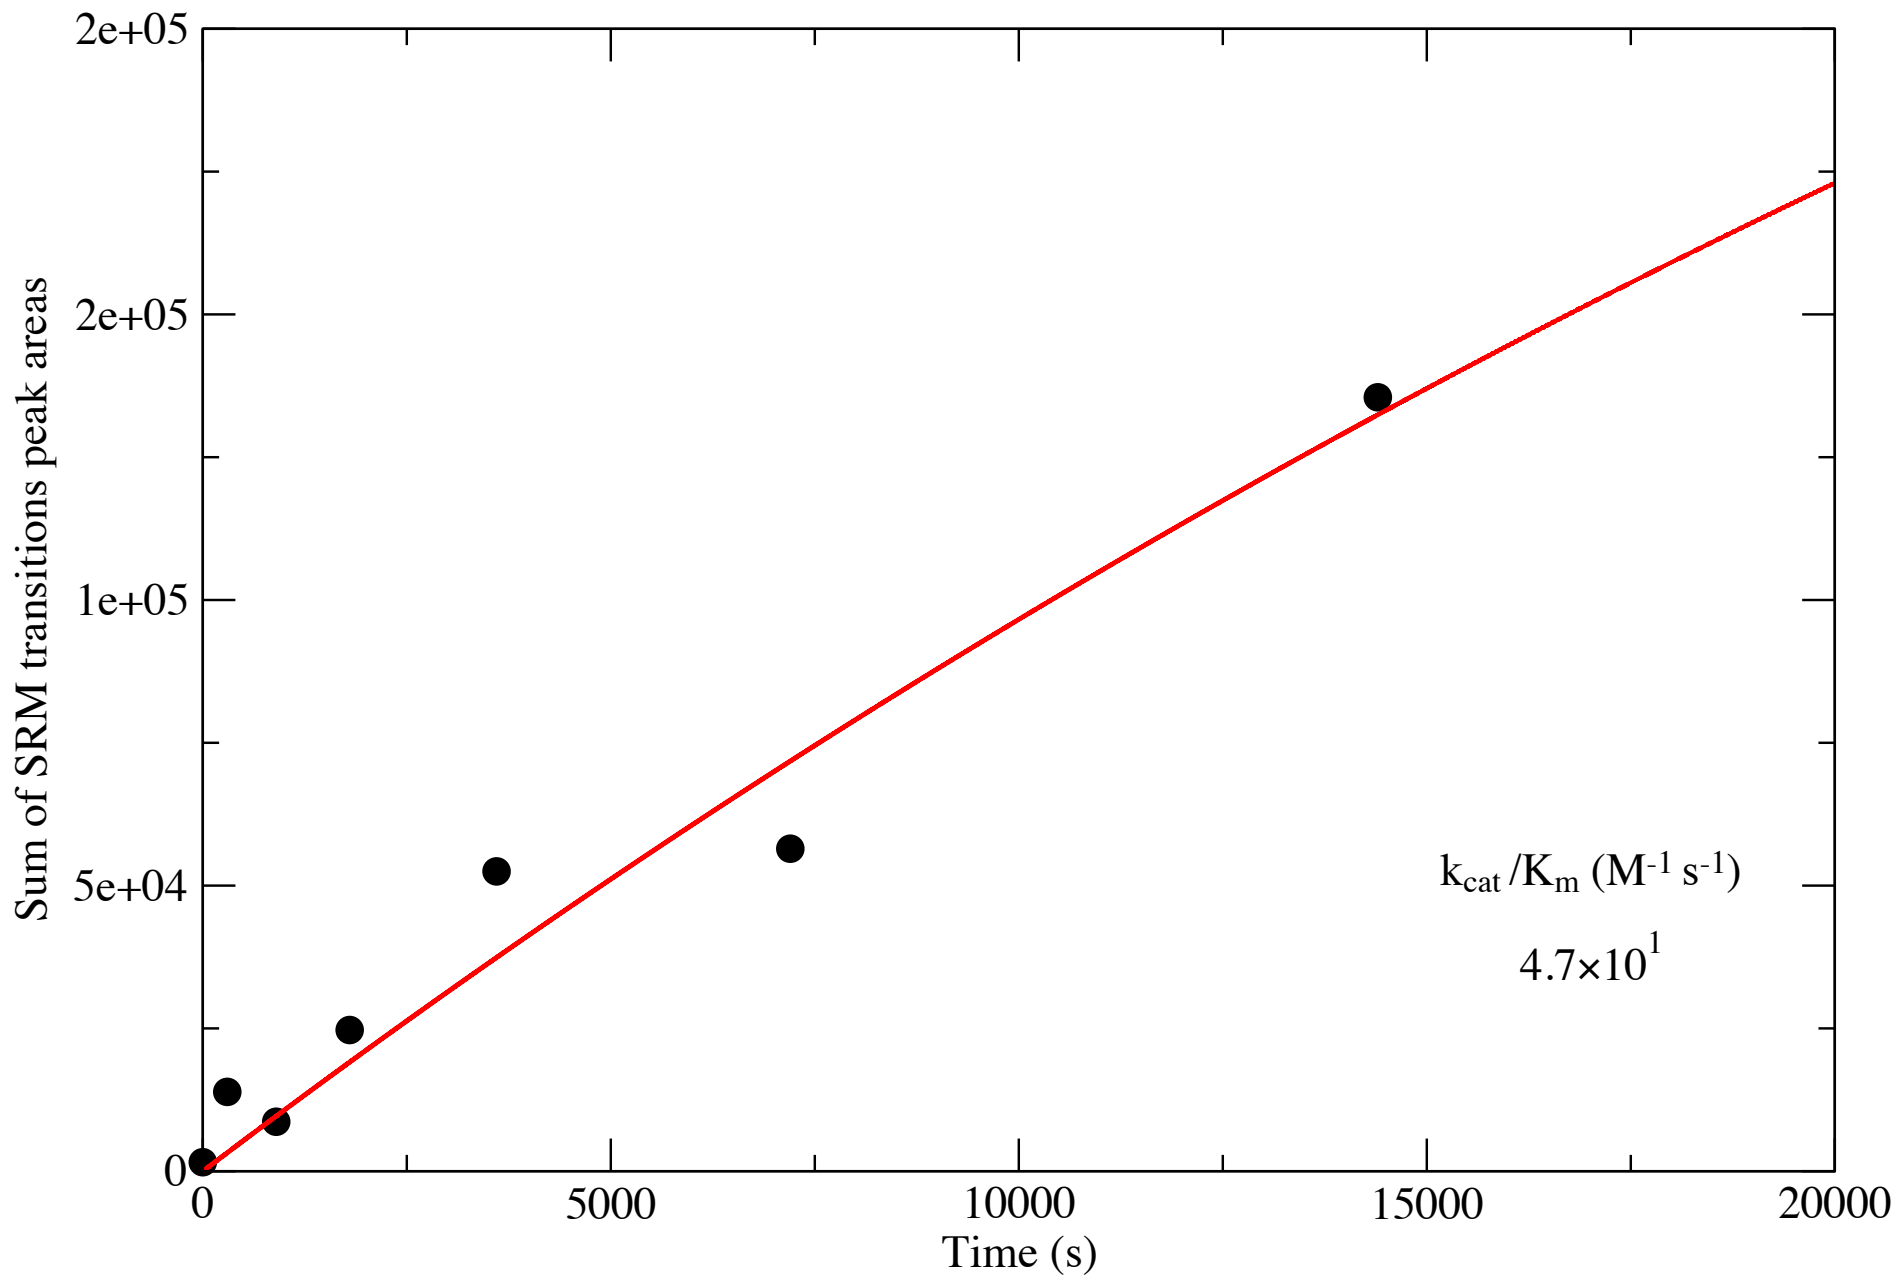

# SPF27\_HUMAN (ALPYFDQGYEAPGVR)

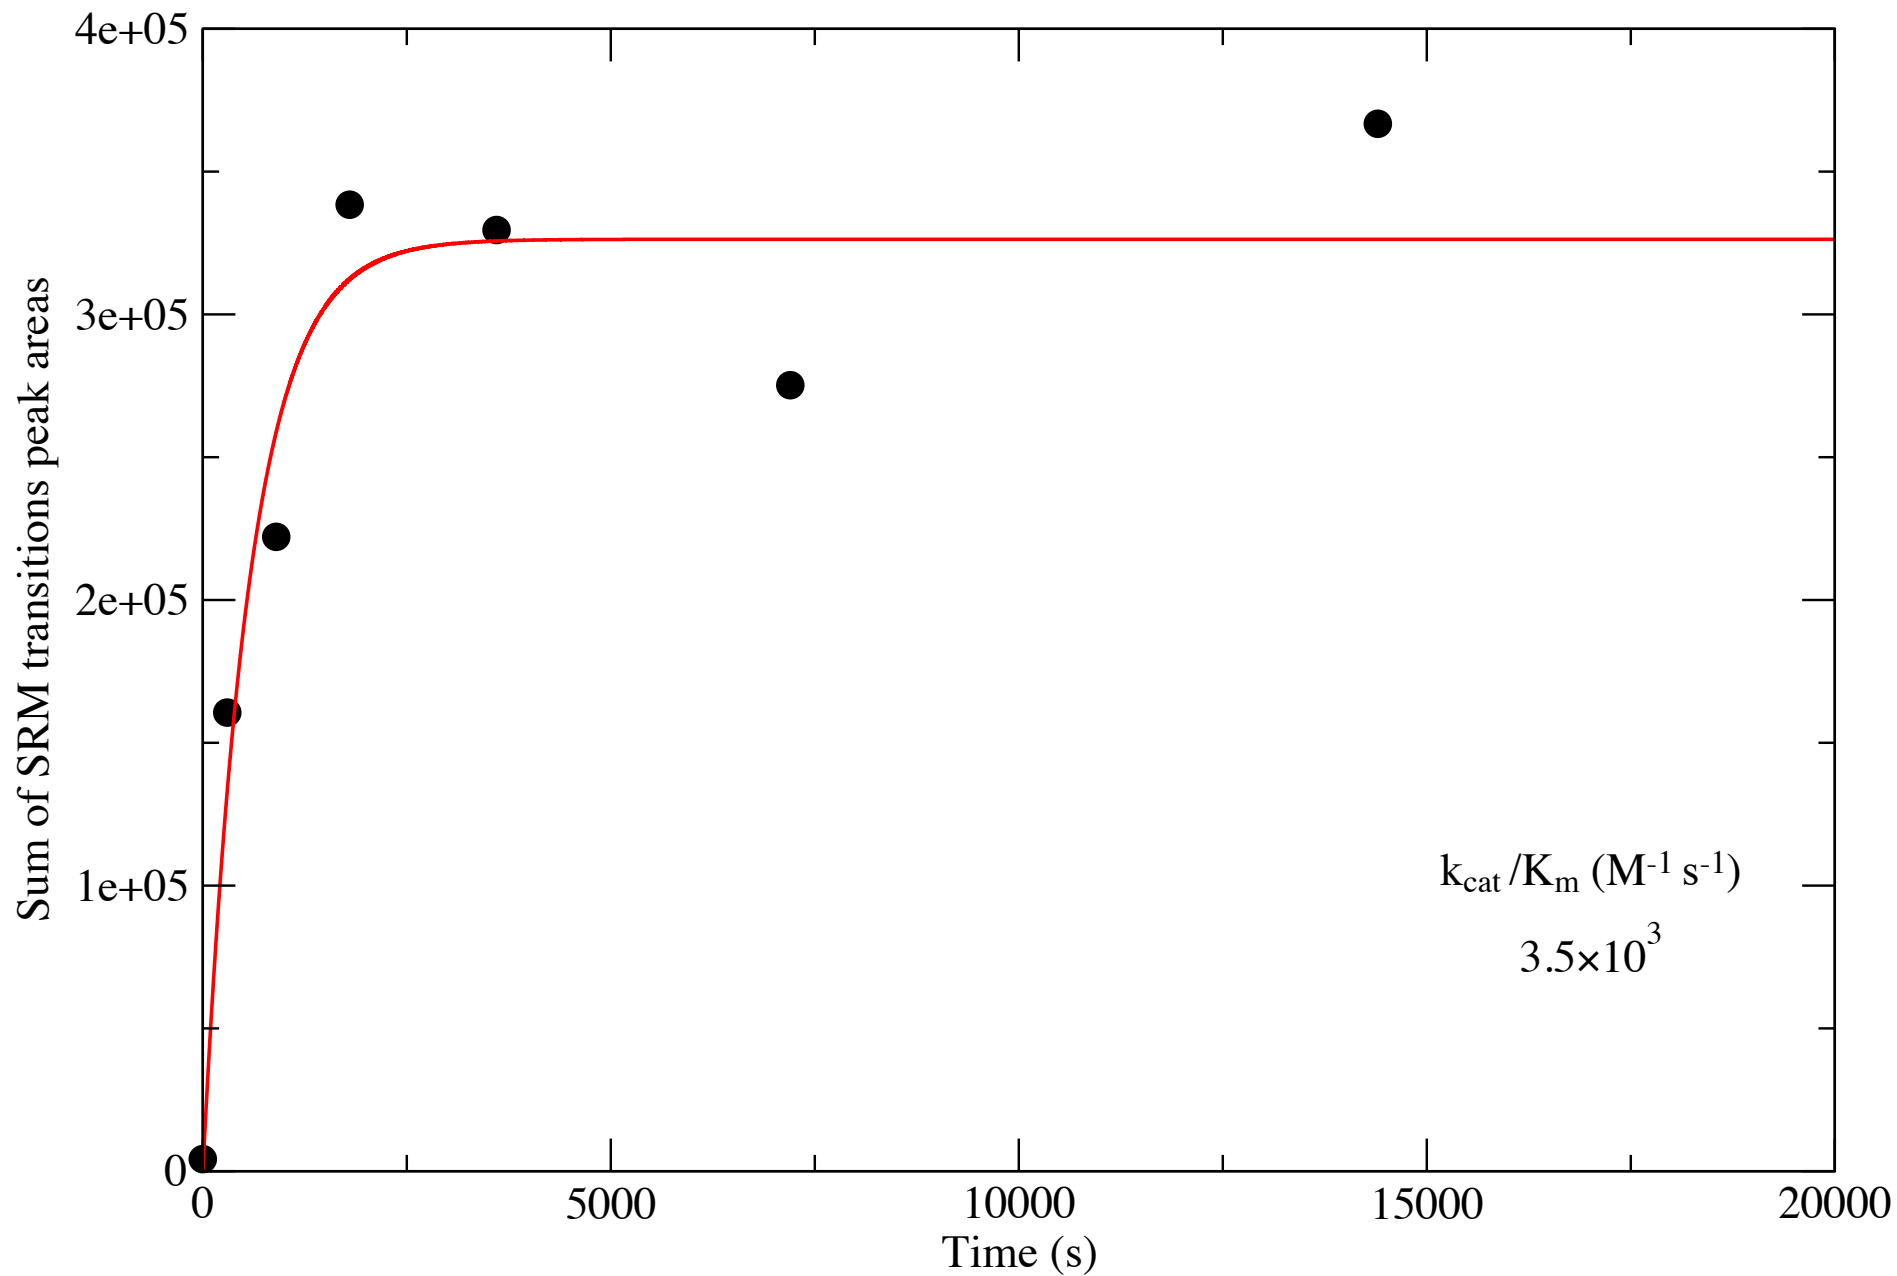

# SR140\_HUMAN (GIPIDATPIDDLDGVPIK)

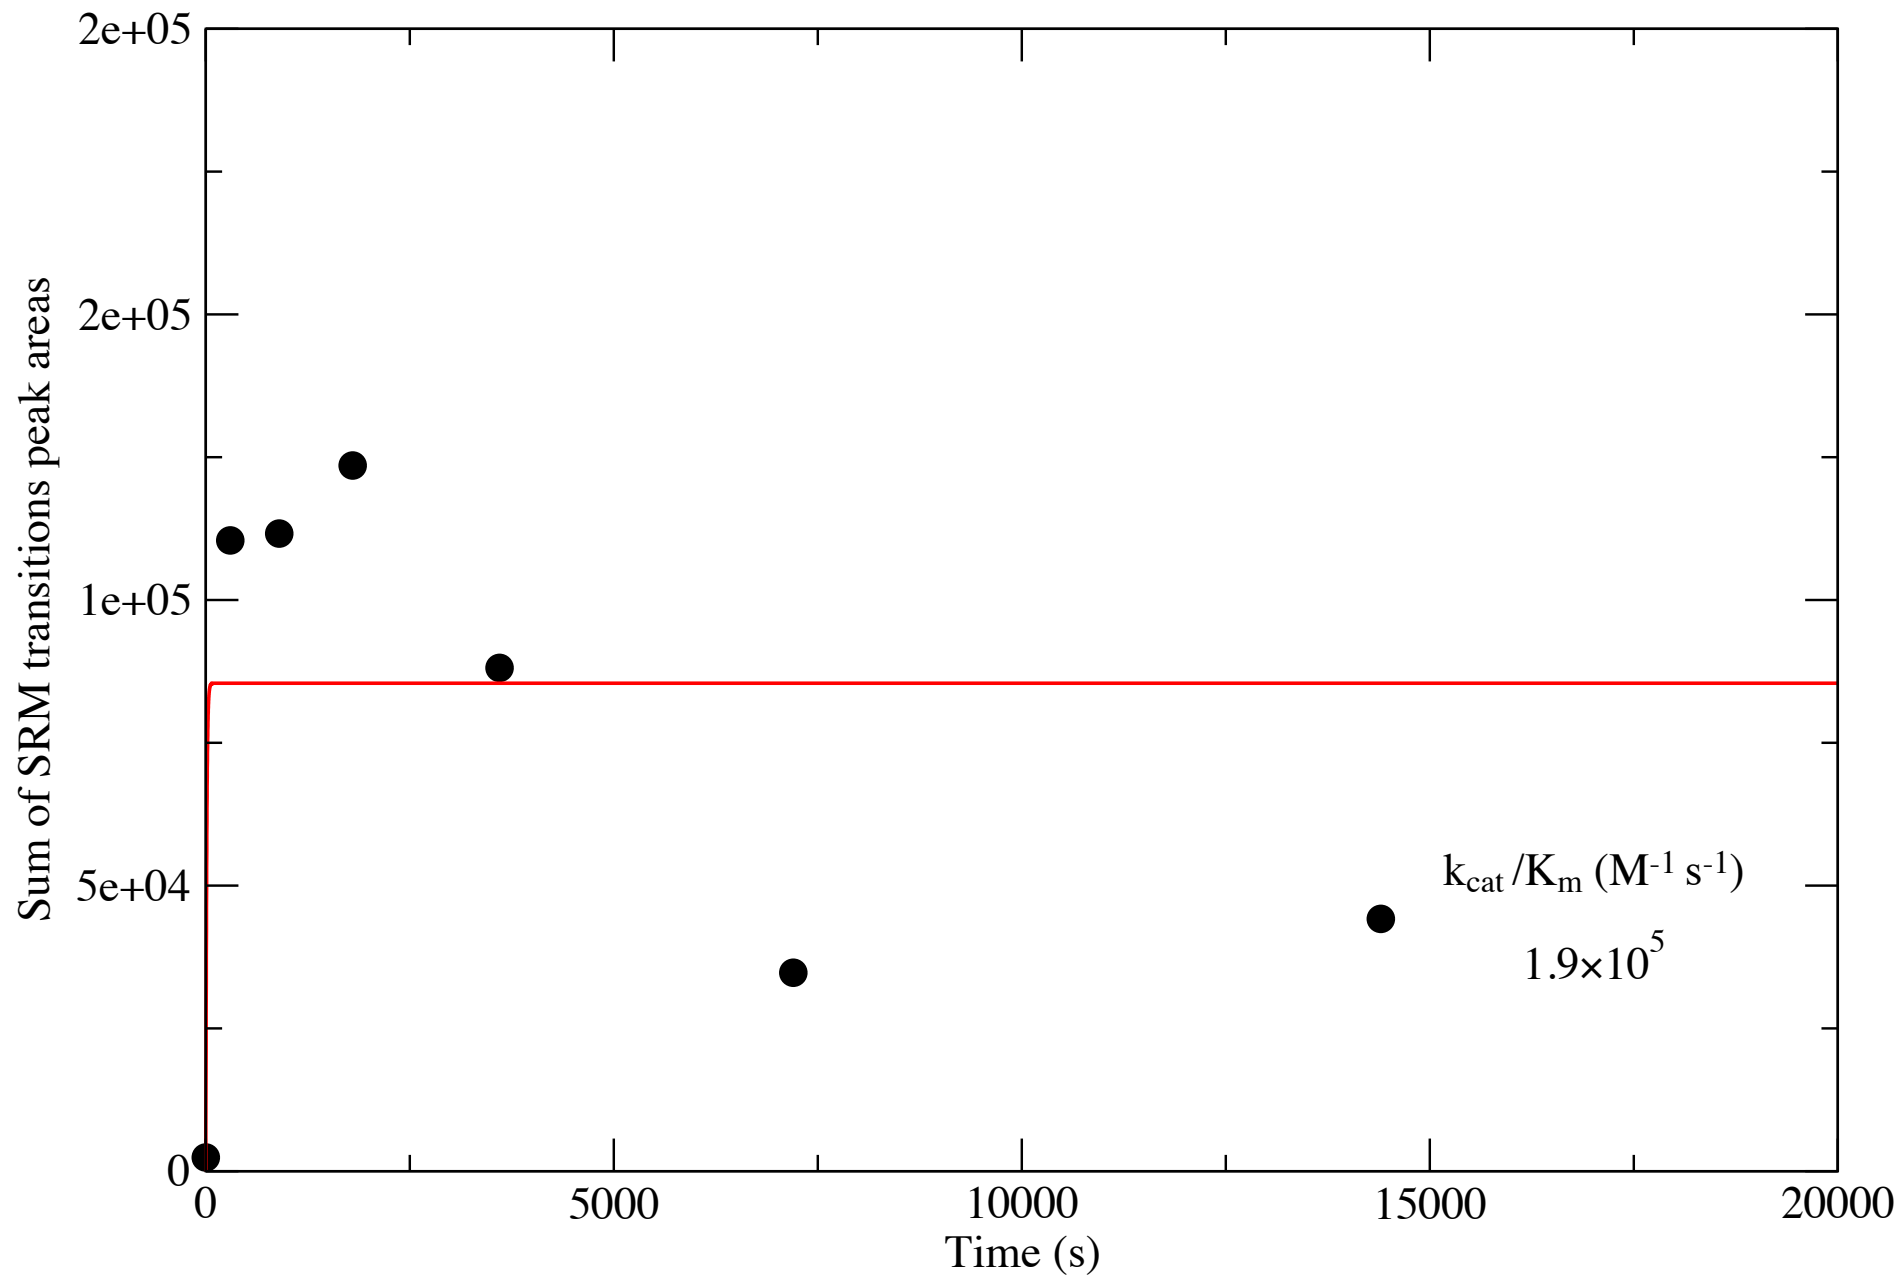



# SR140\_HUMAN (GVPIKSLDDDDLDGVPLDATEDSKK)

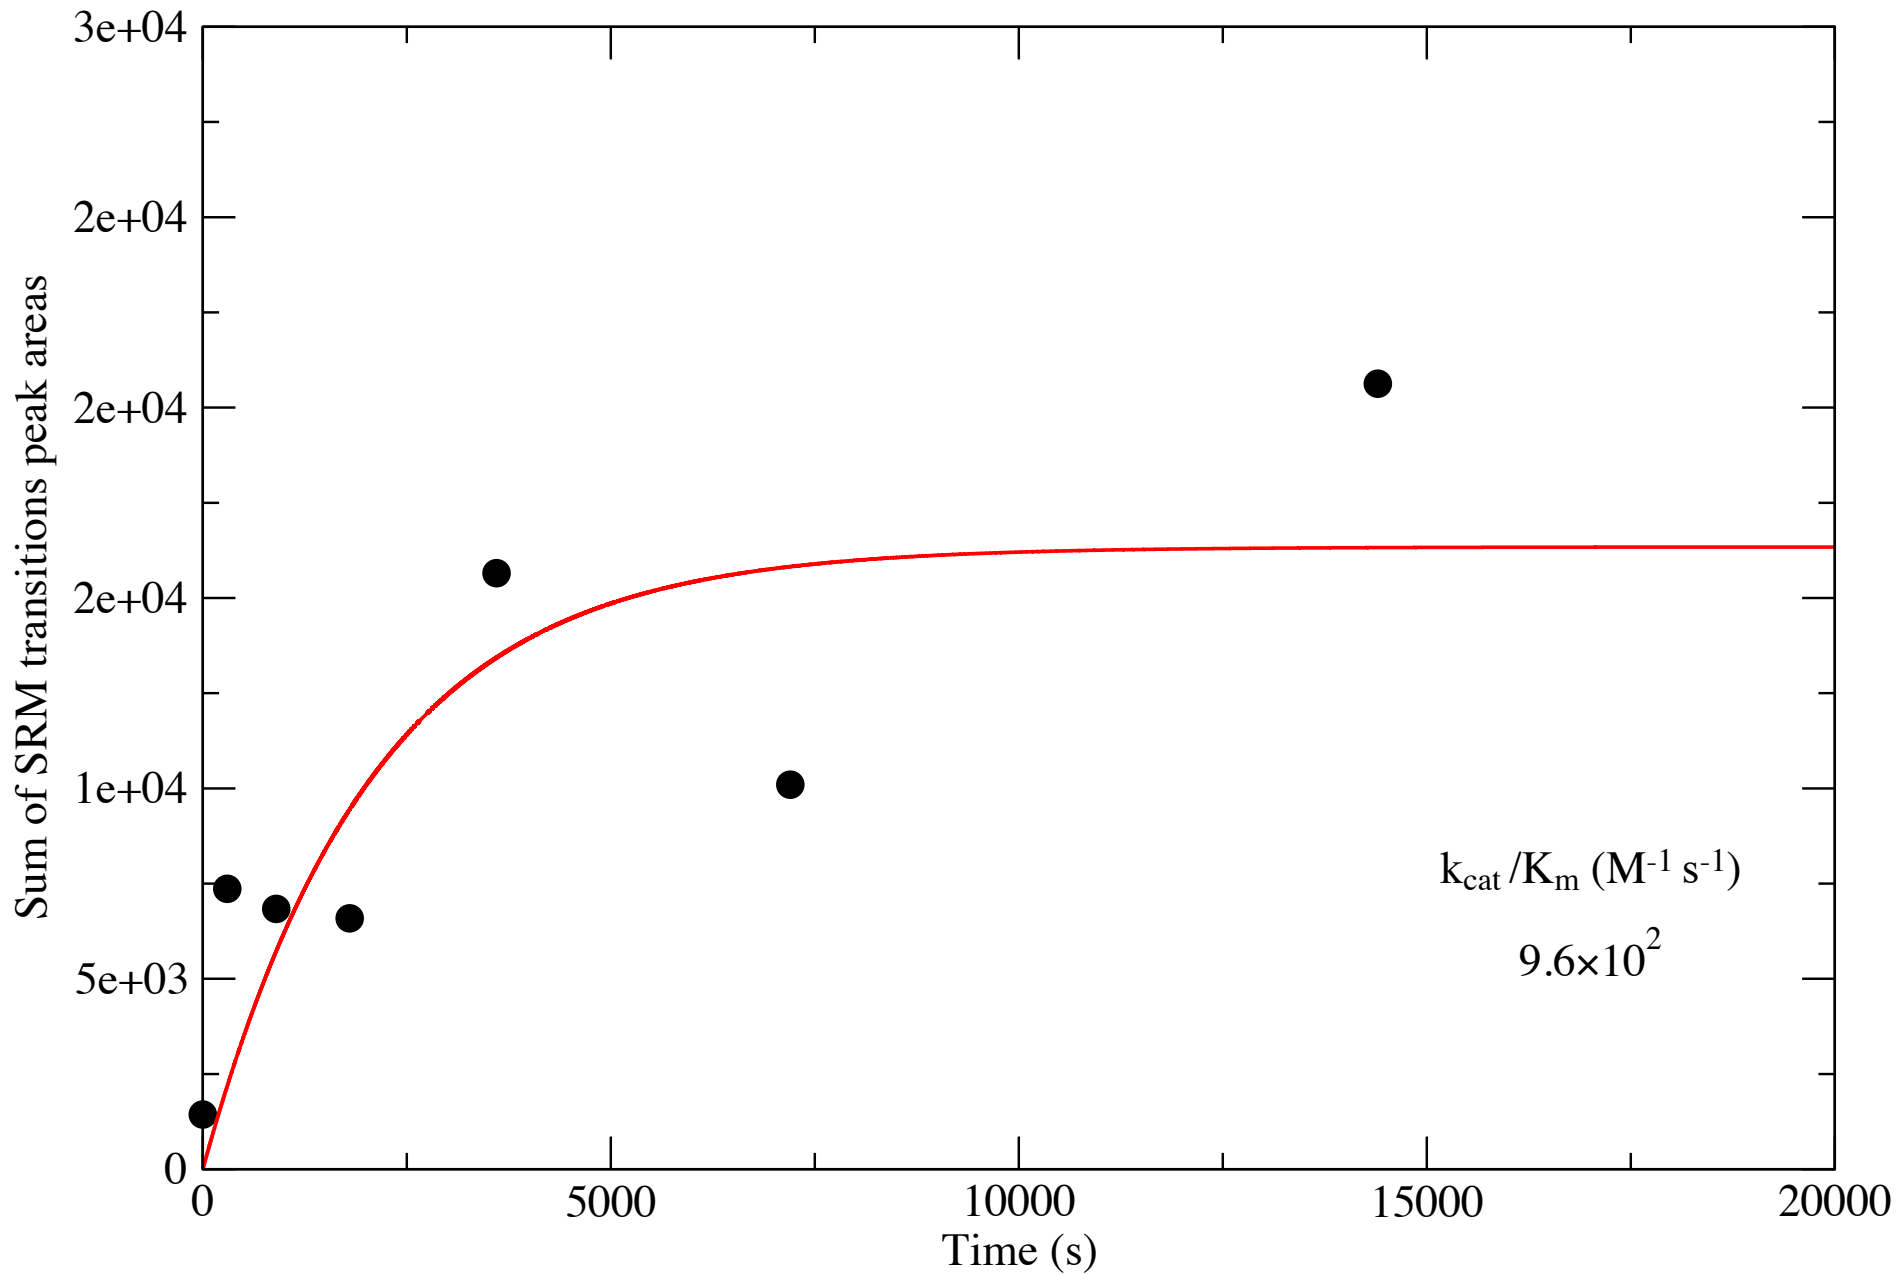

# SR140\_HUMAN (GVPLDATEDSK)

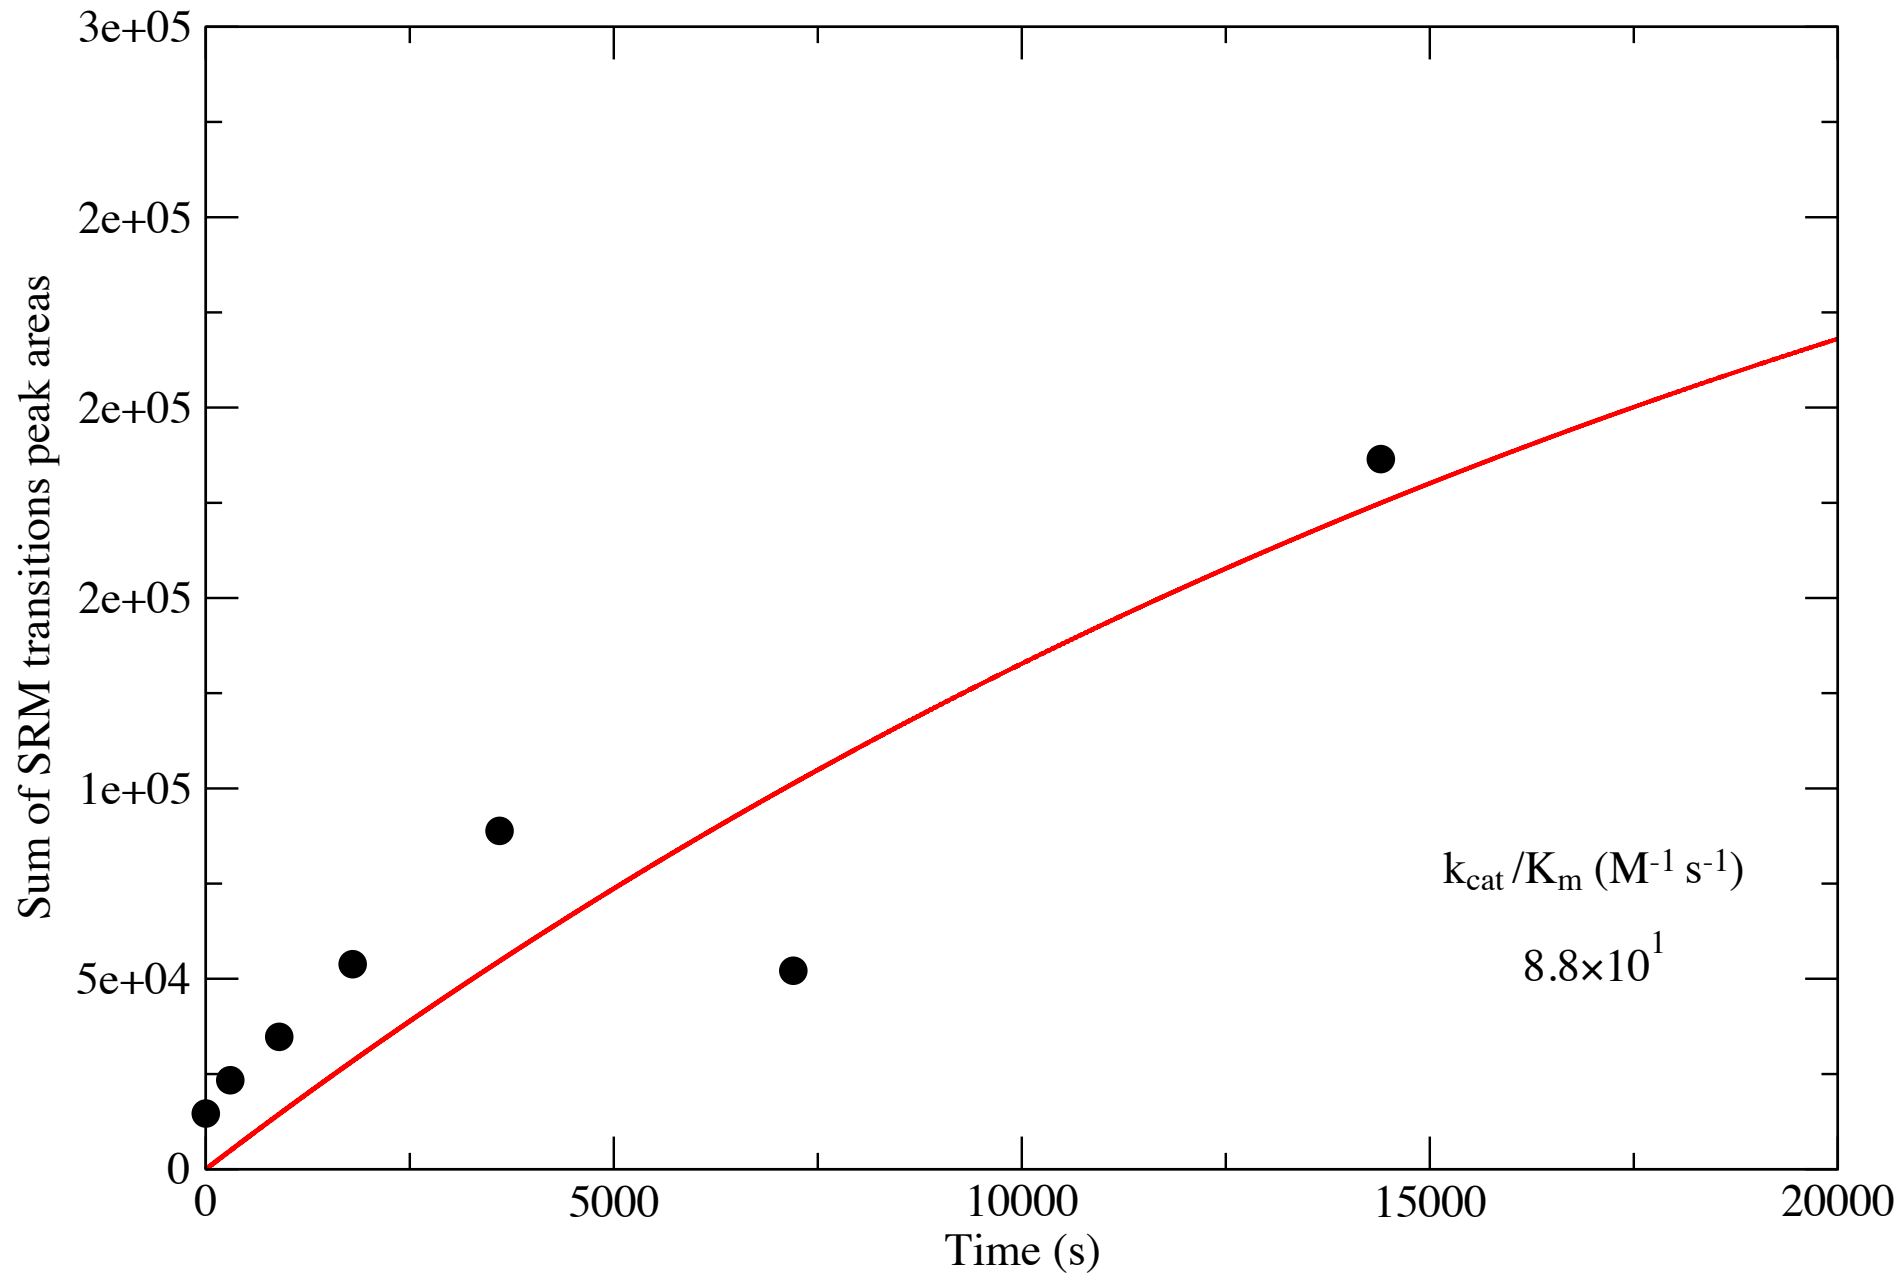

# STPAP\_HUMAN (GWDCSFPR)

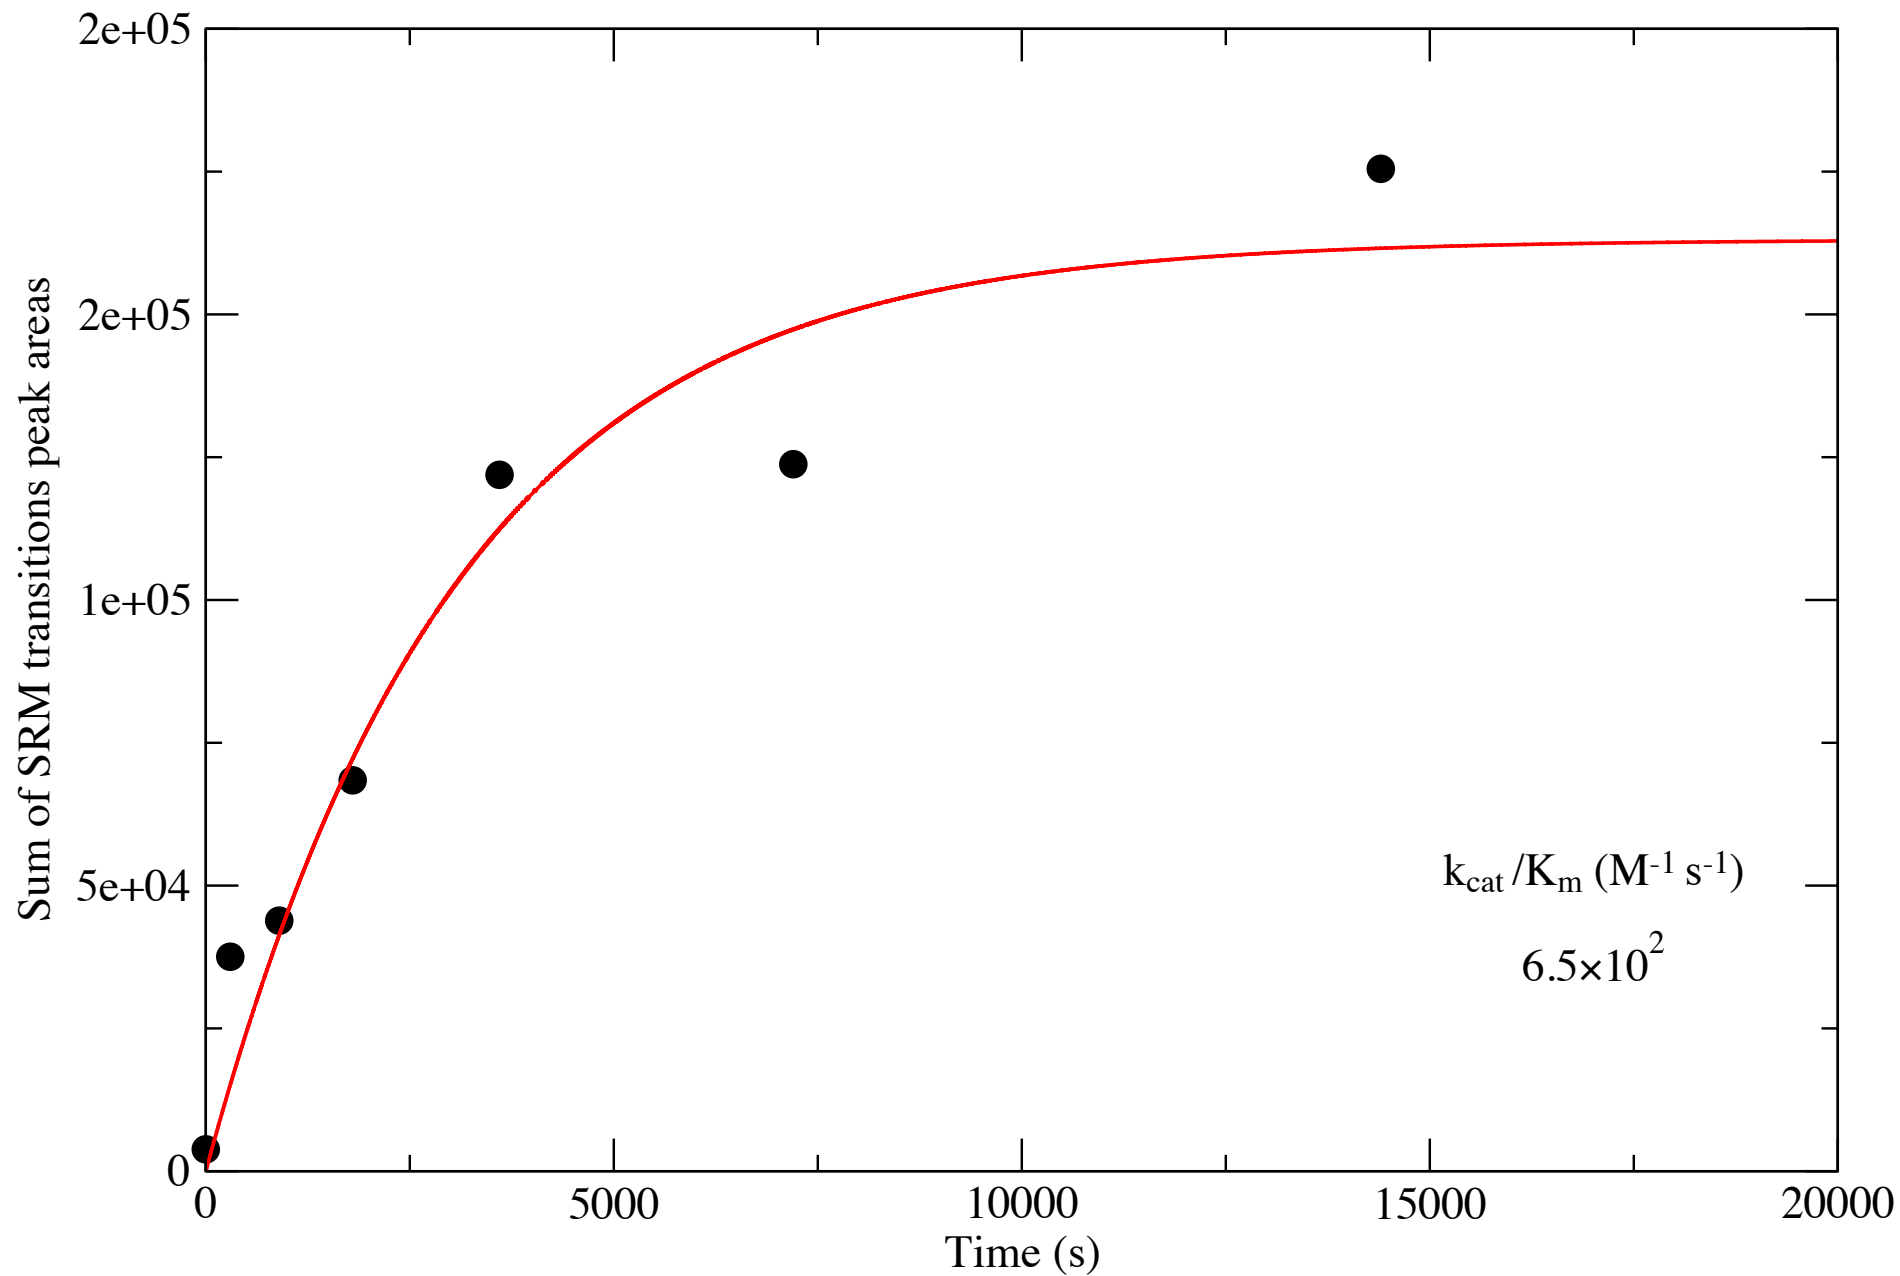

# SYIM\_HUMAN (GVFTDVAGPELQNK)

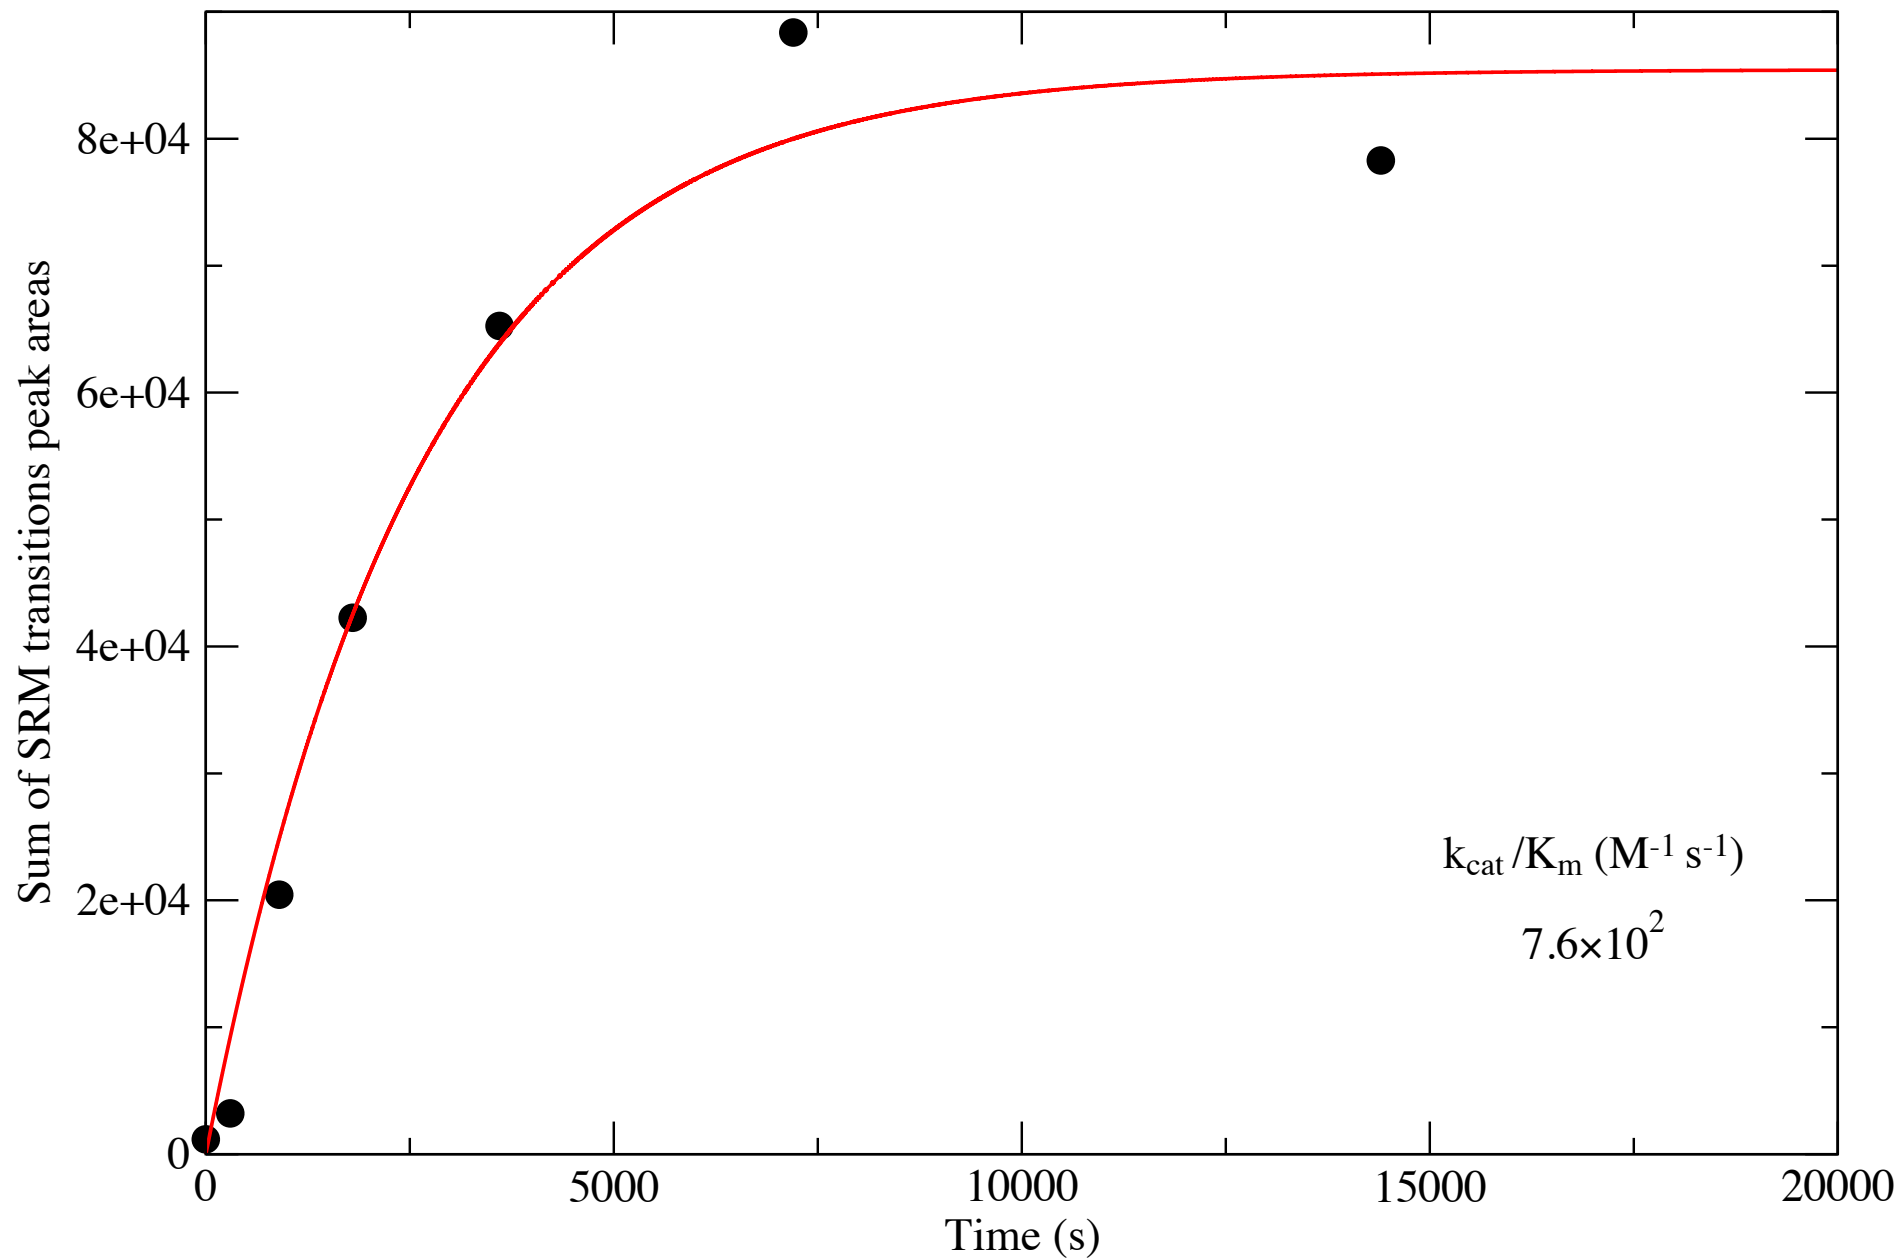

# SYWC\_HUMAN (FVDPWTVQTSSAK)

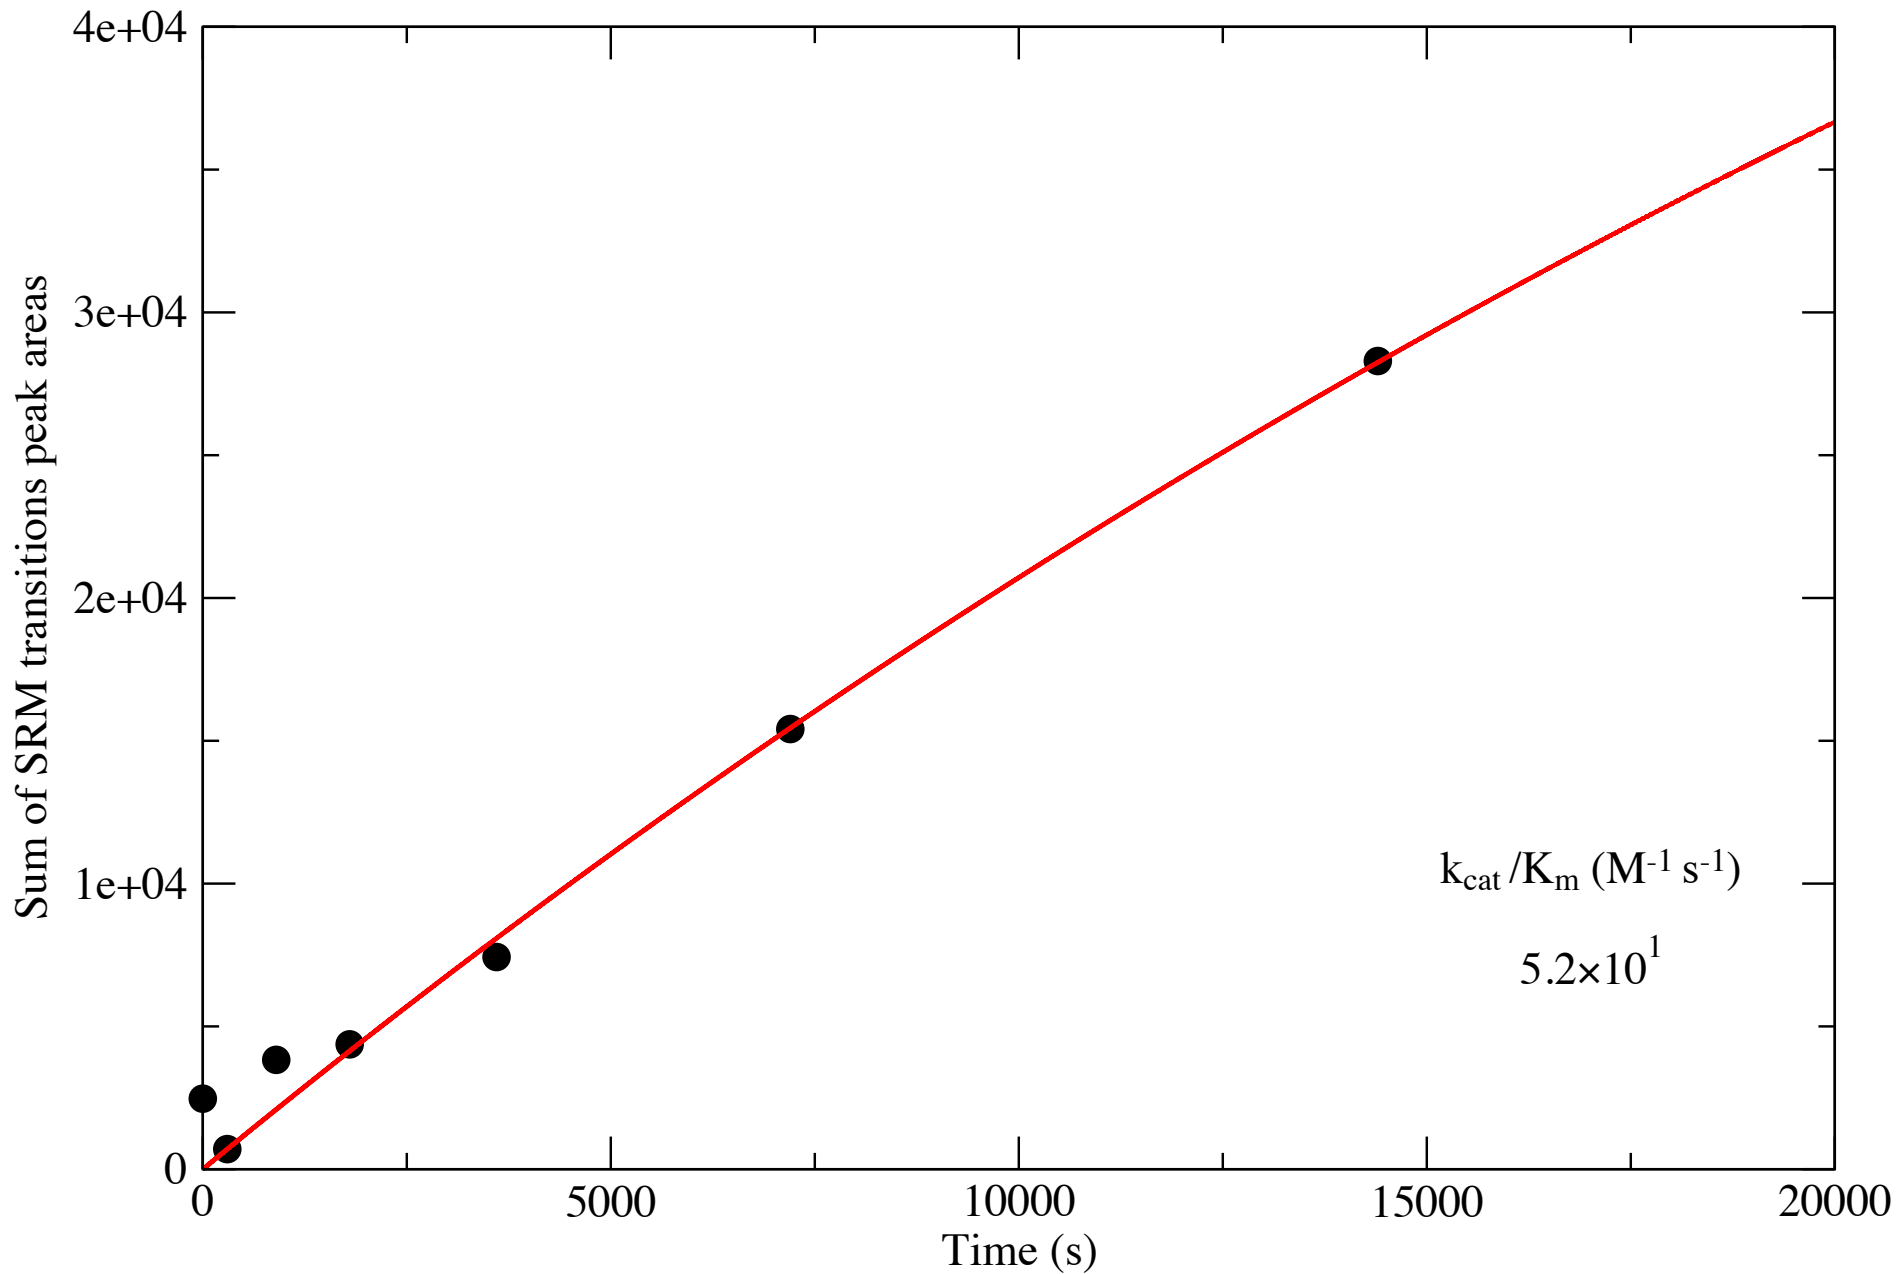

# T2EA\_HUMAN (AFQEREEGHAGPDDNEEVMR)

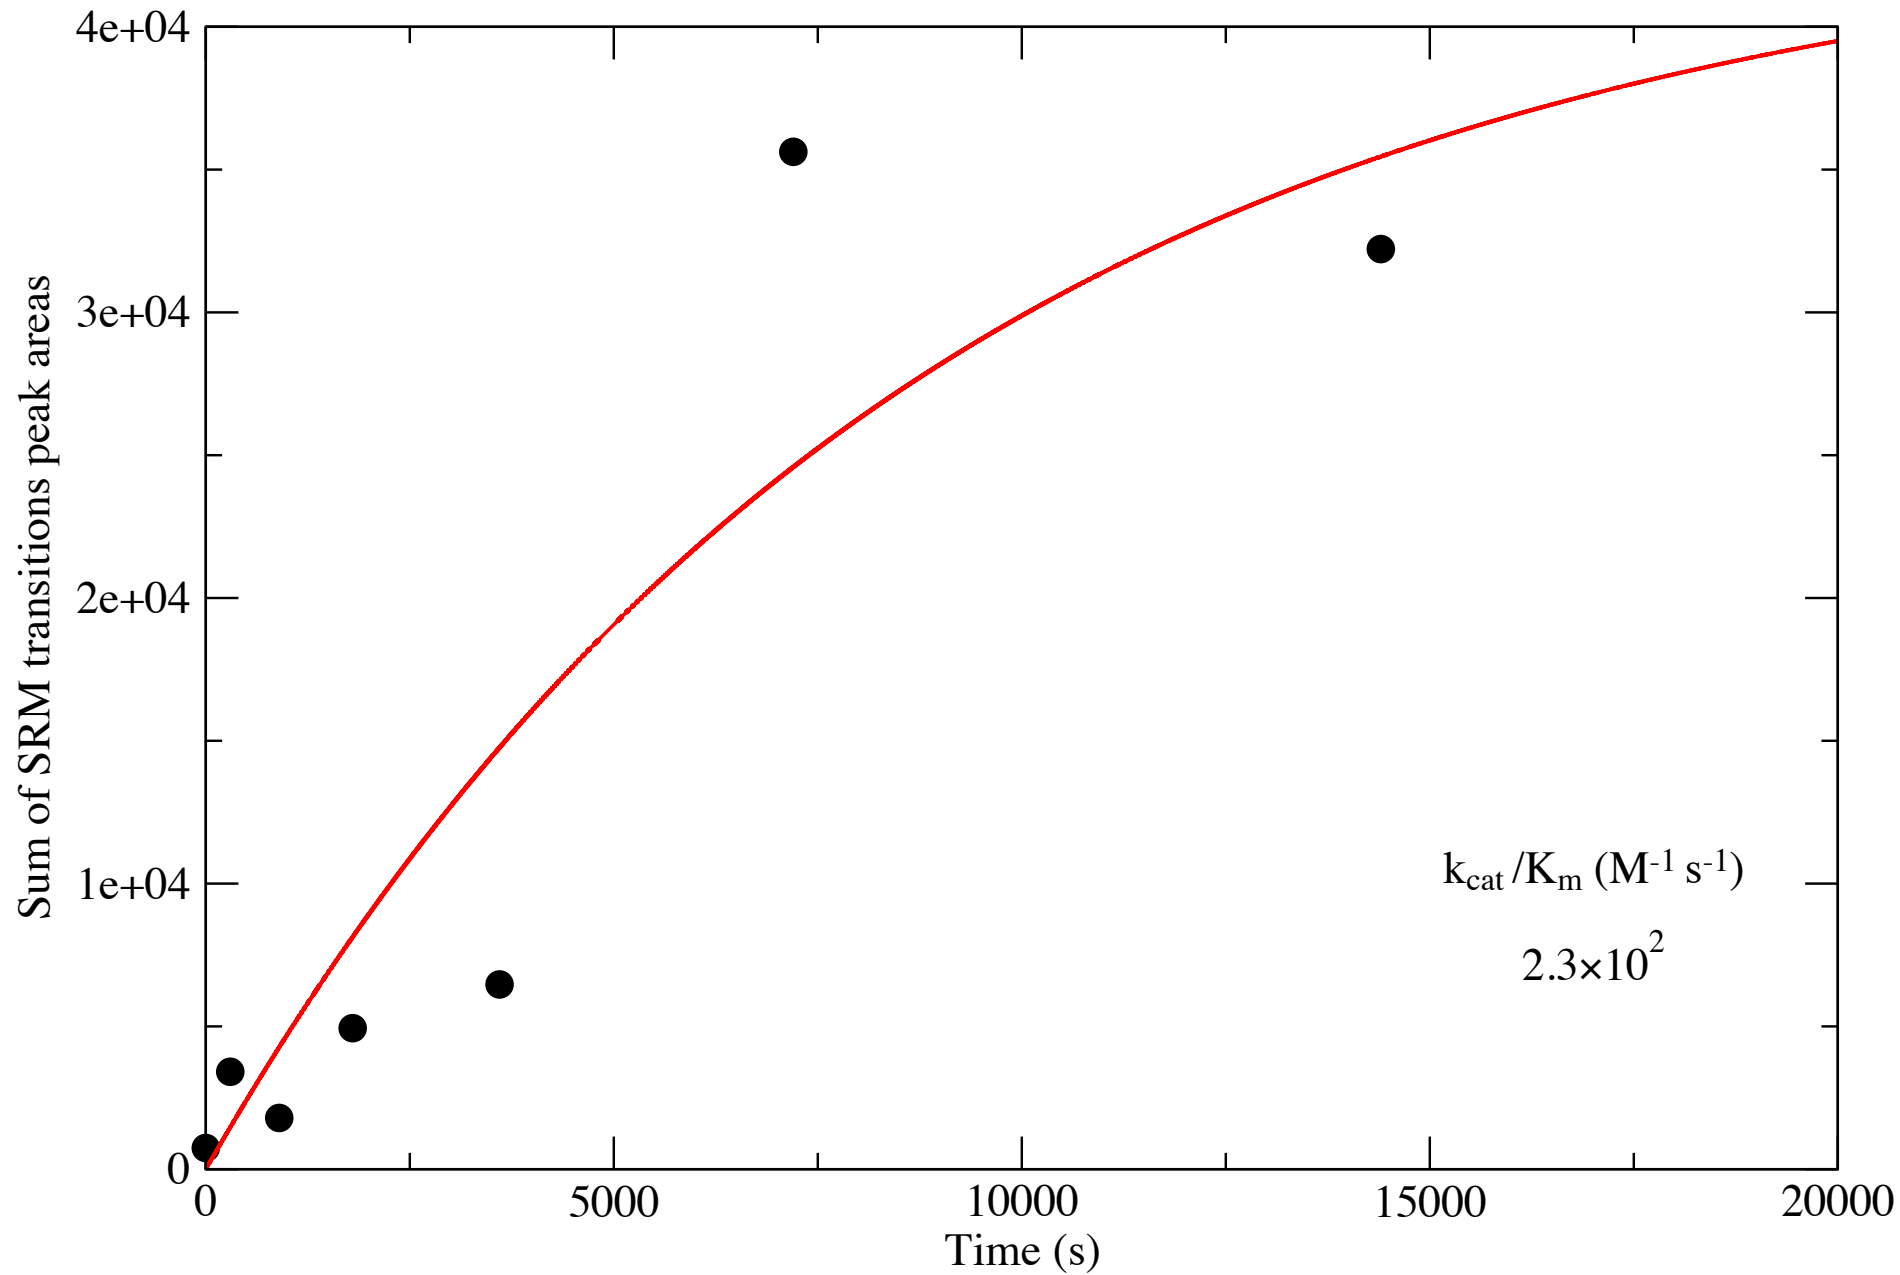

# T2FA\_HUMAN (YMSDGSSSSQEEPESK)

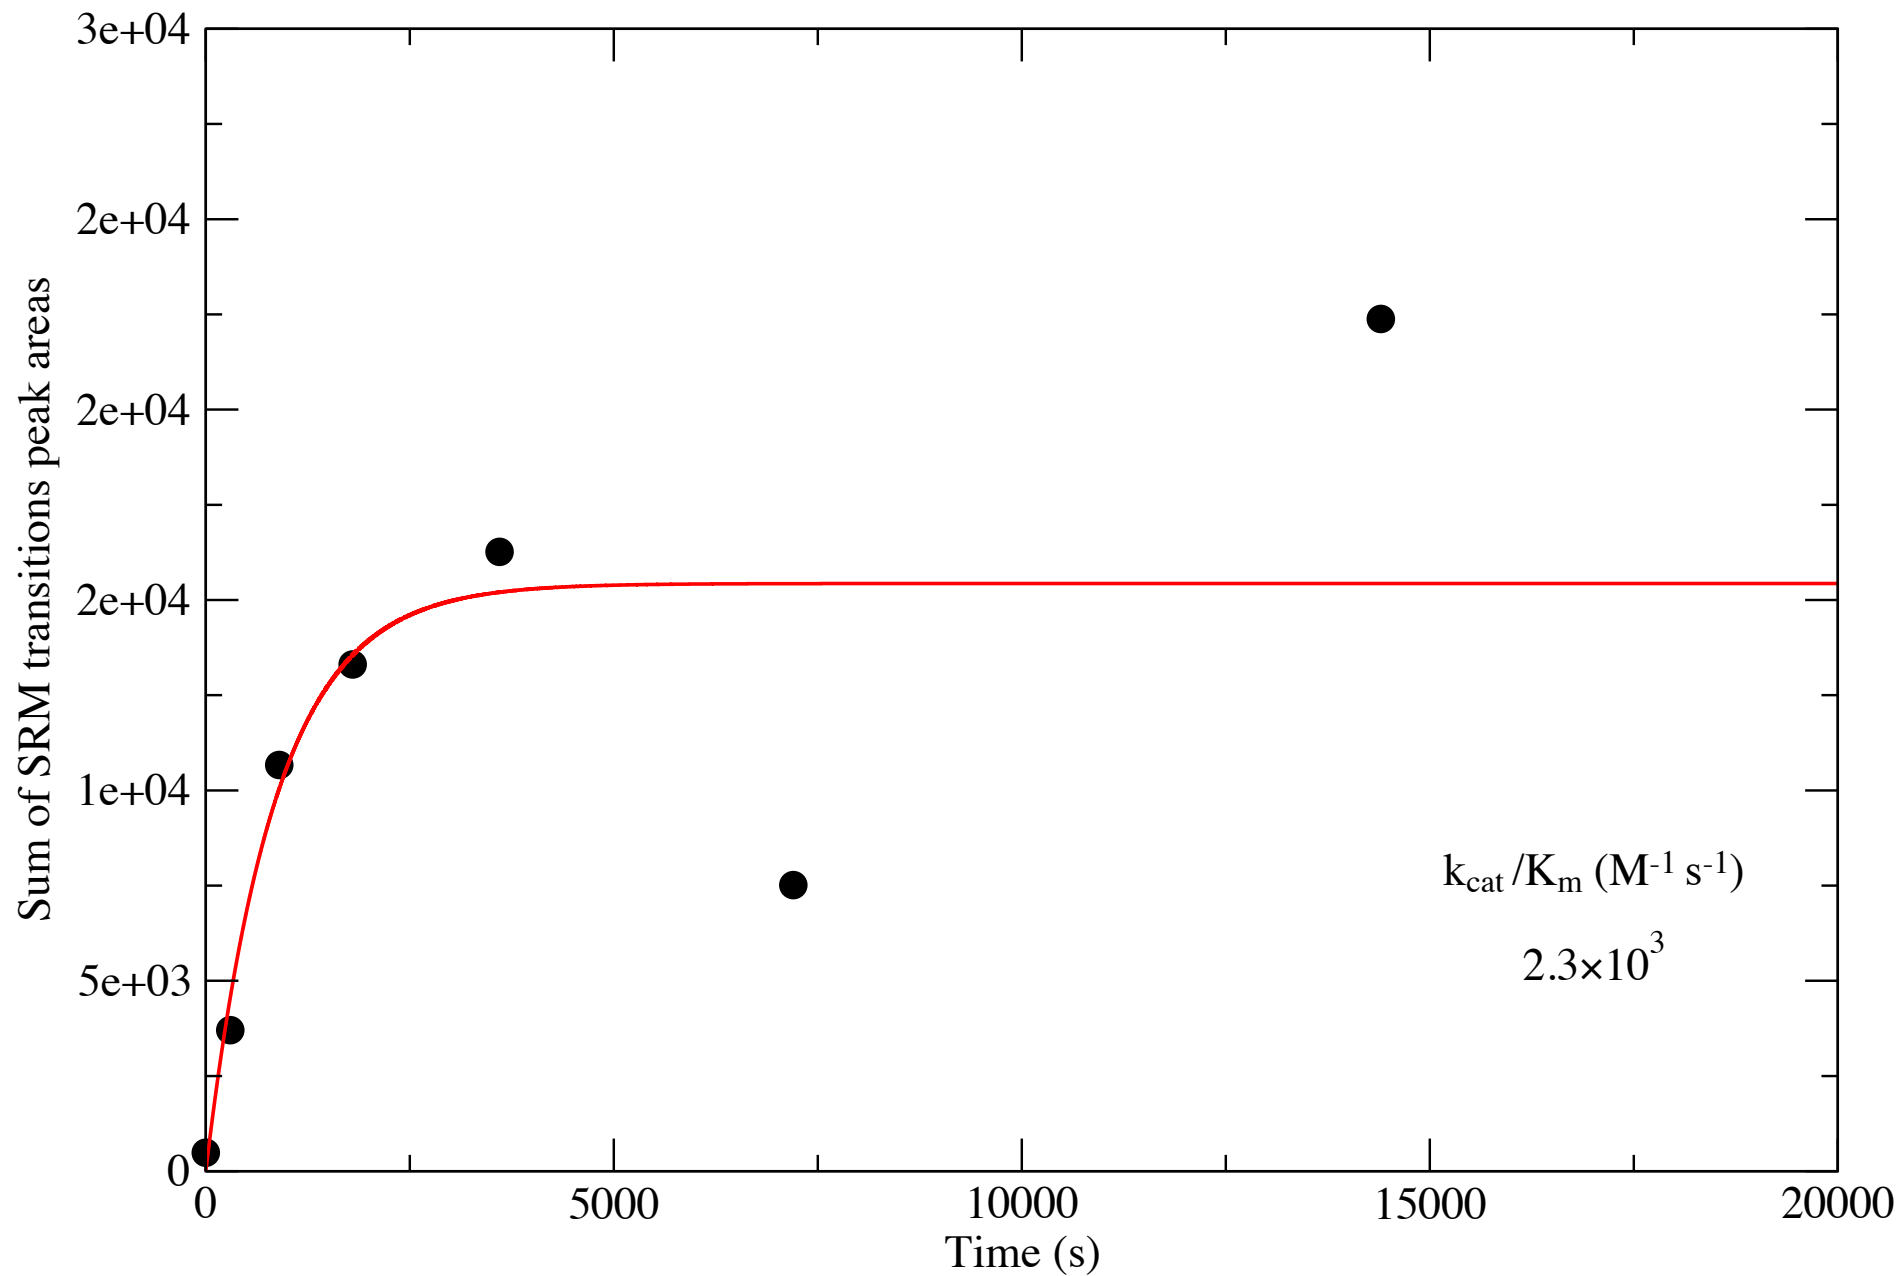

# TBA1B\_HUMAN (GQMPSDKTIGGGDDSFNTFFSETGAGK)

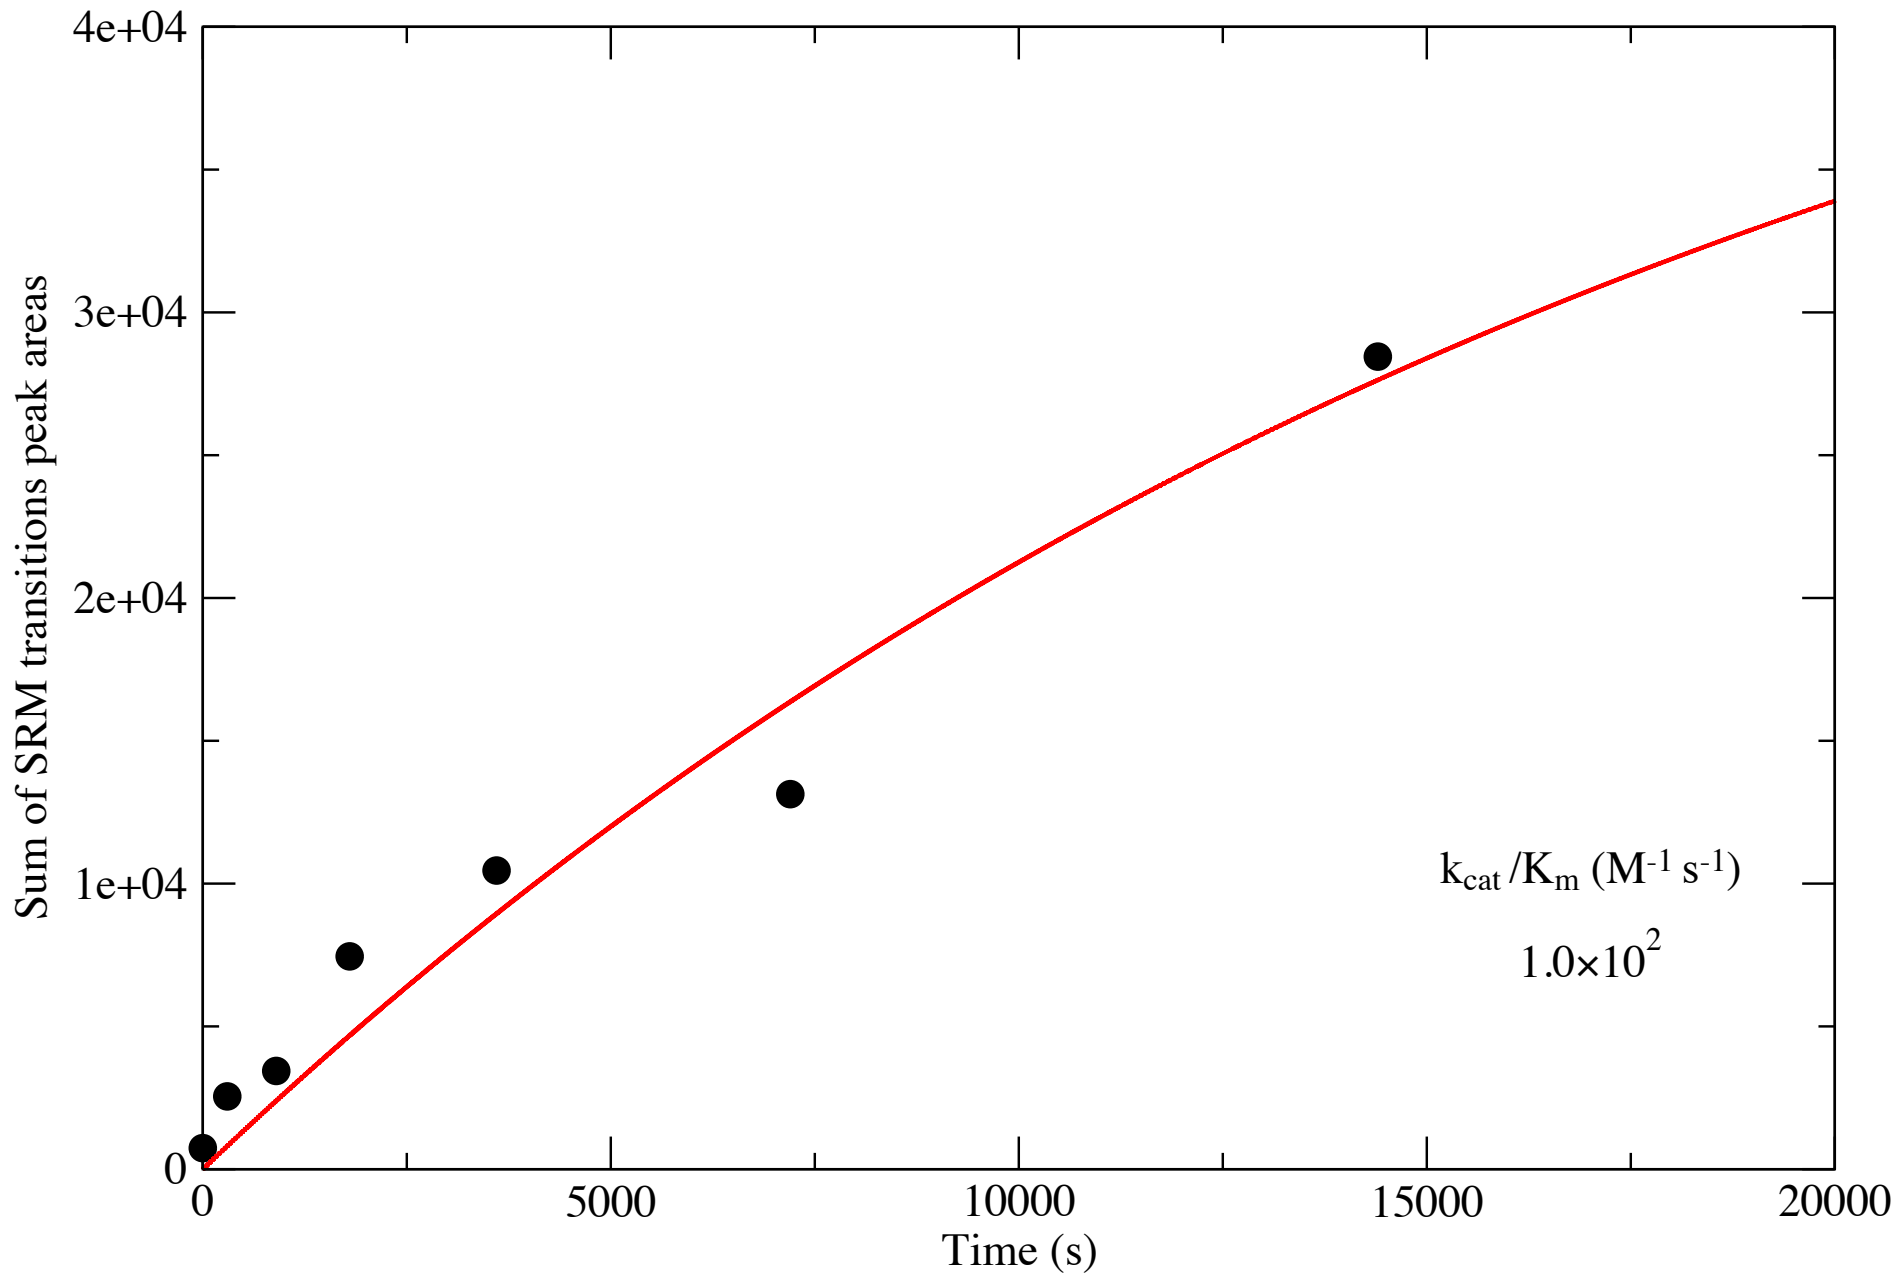



# TBB5\_HUMAN (SVLDVVR)

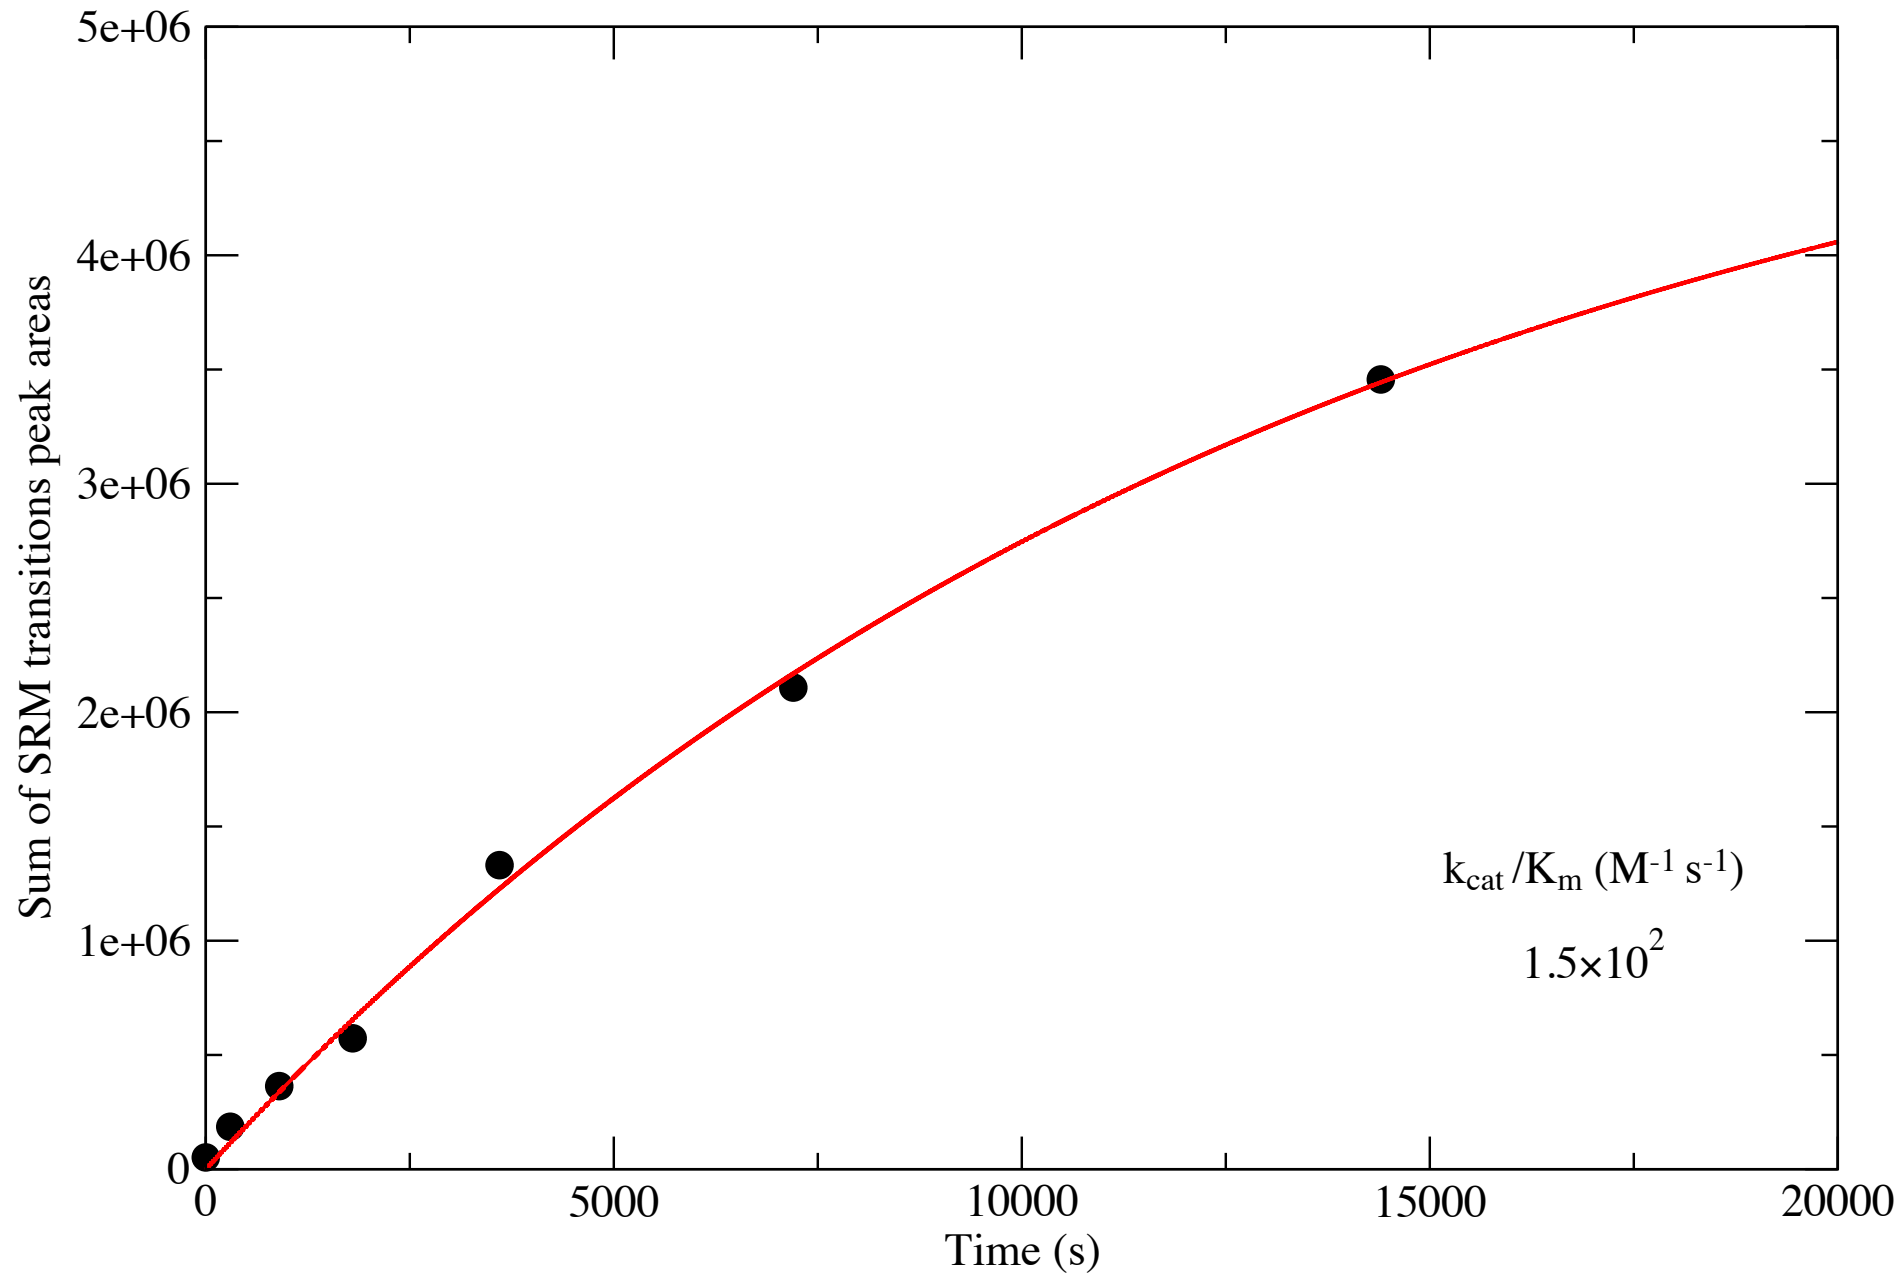

# TBCC\_HUMAN (AAPGIPPAVESIQDSPLPK)

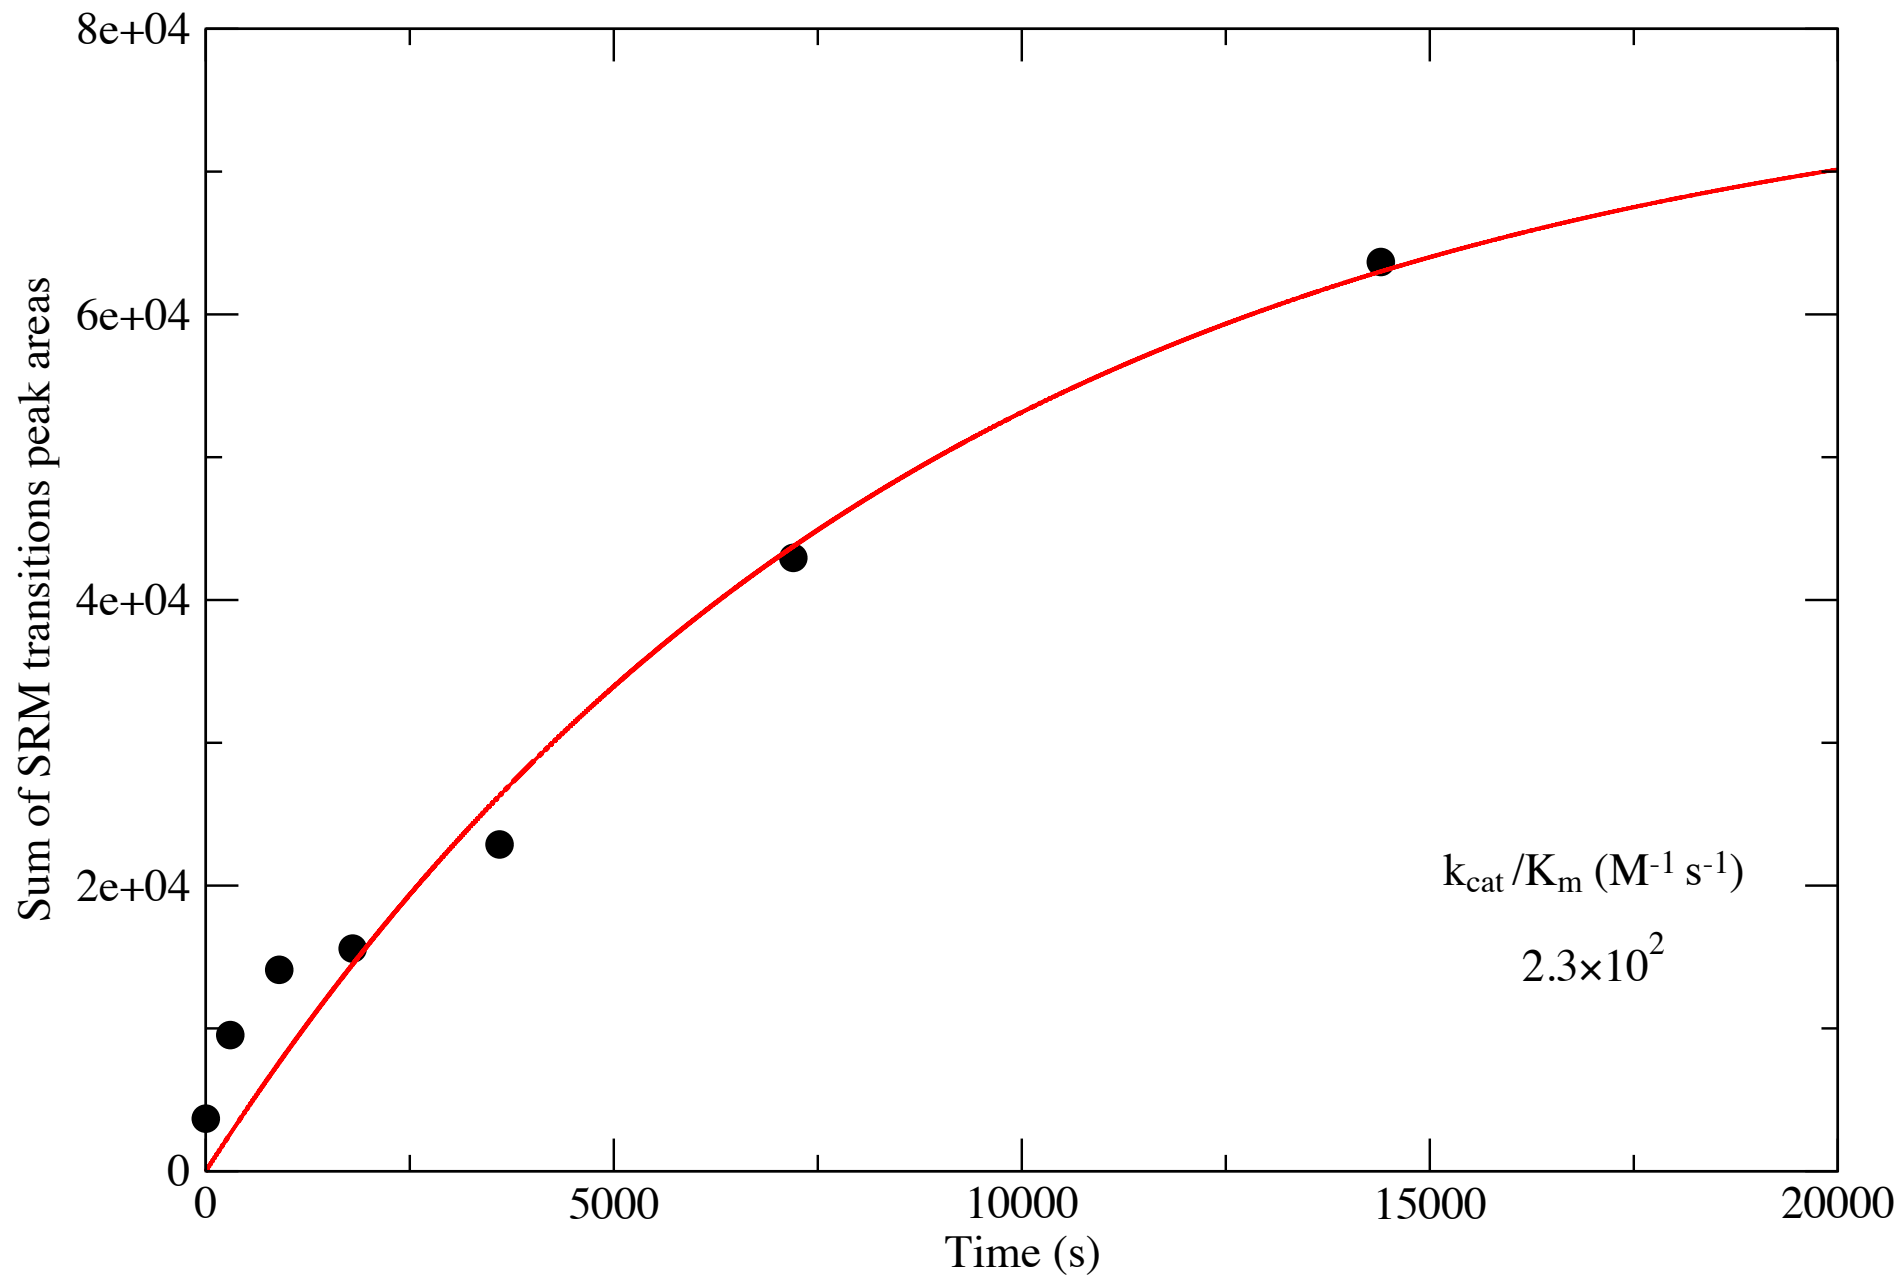

# TBL1X\_HUMAN (AVMPDVVQTR)

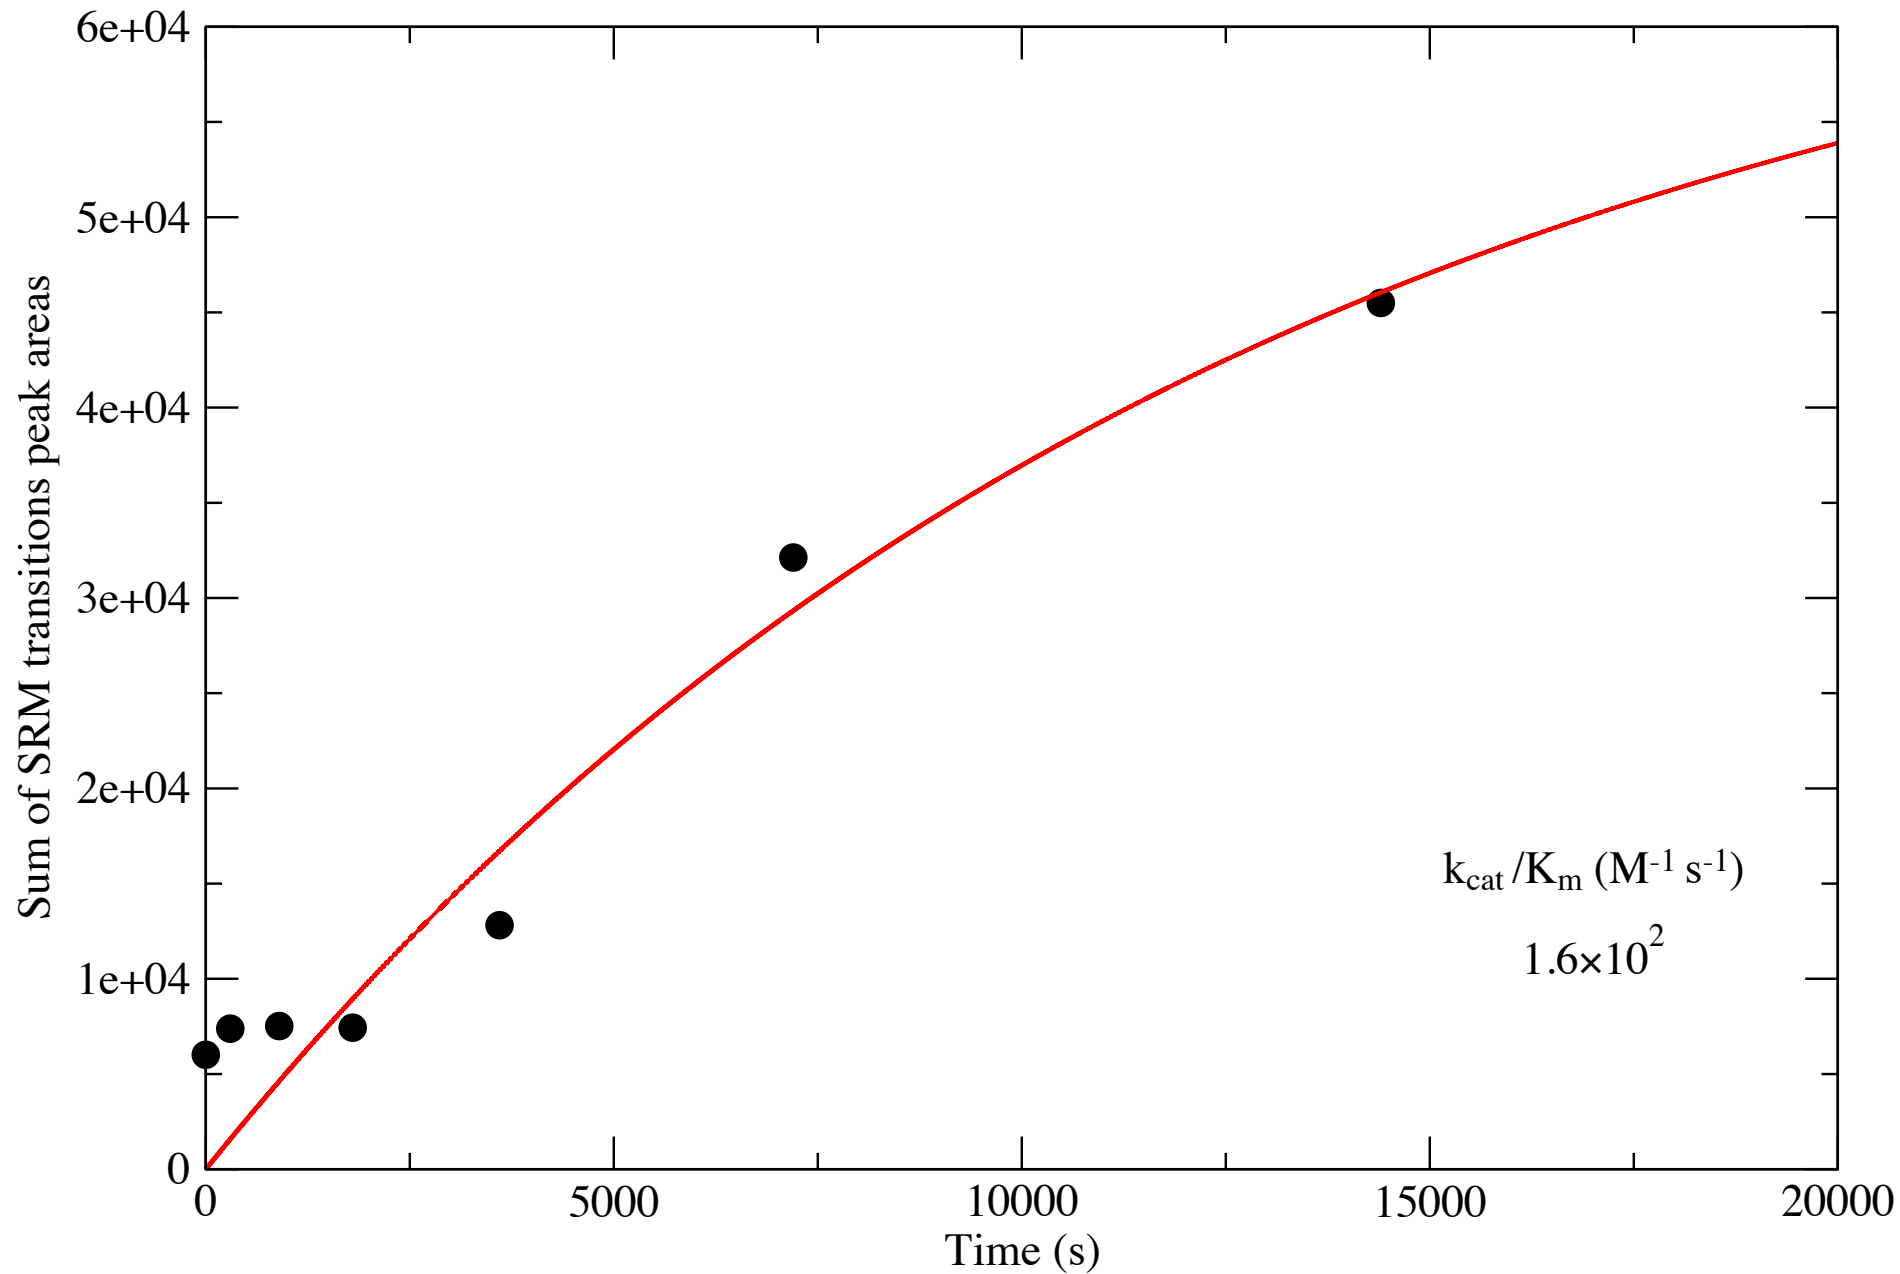

# TCOF\_HUMAN (SAVGTLPATSPQSTSVQAK)

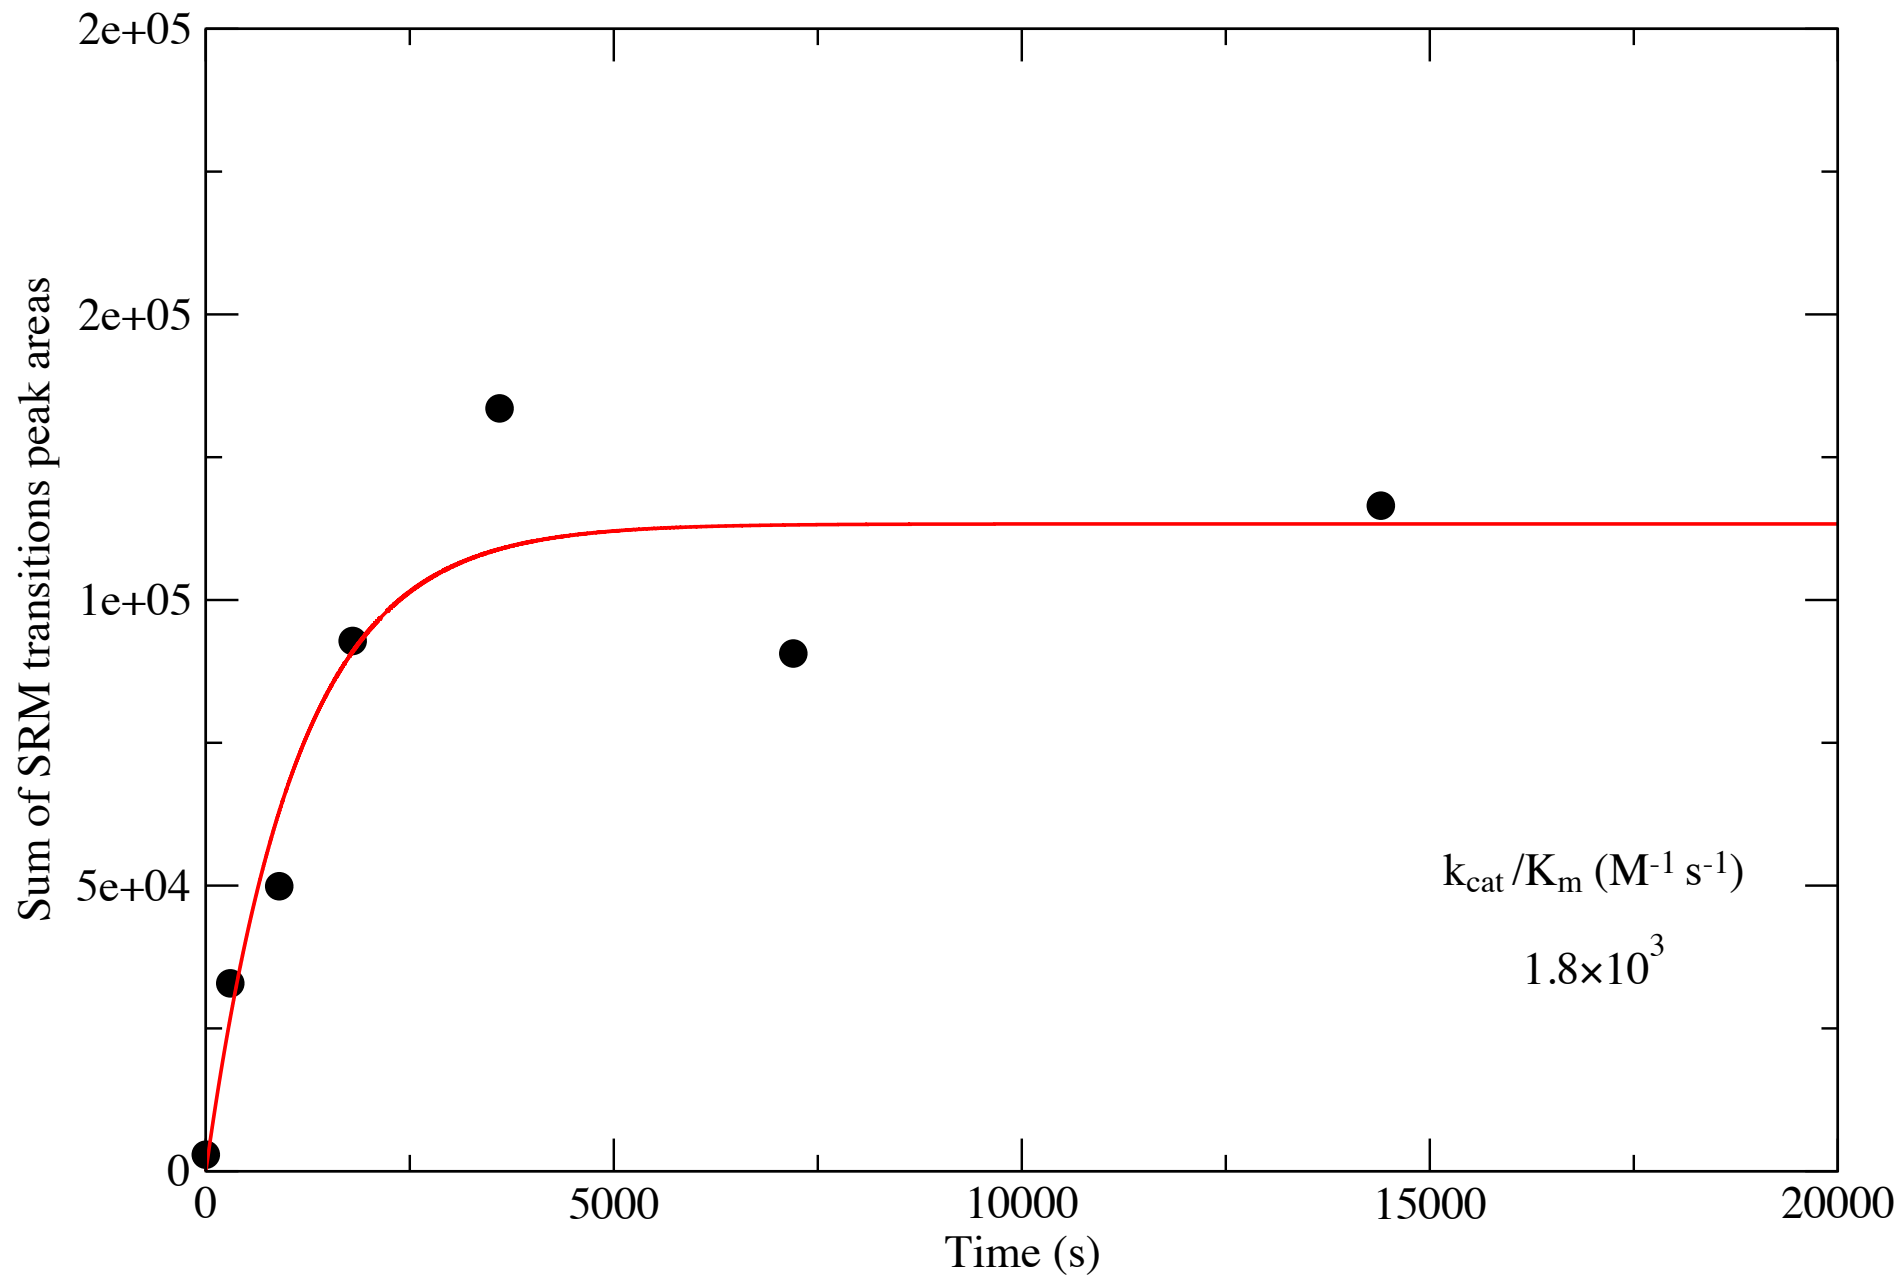

# TEBP\_HUMAN (GADDDSQDSDDEKMPDLE)

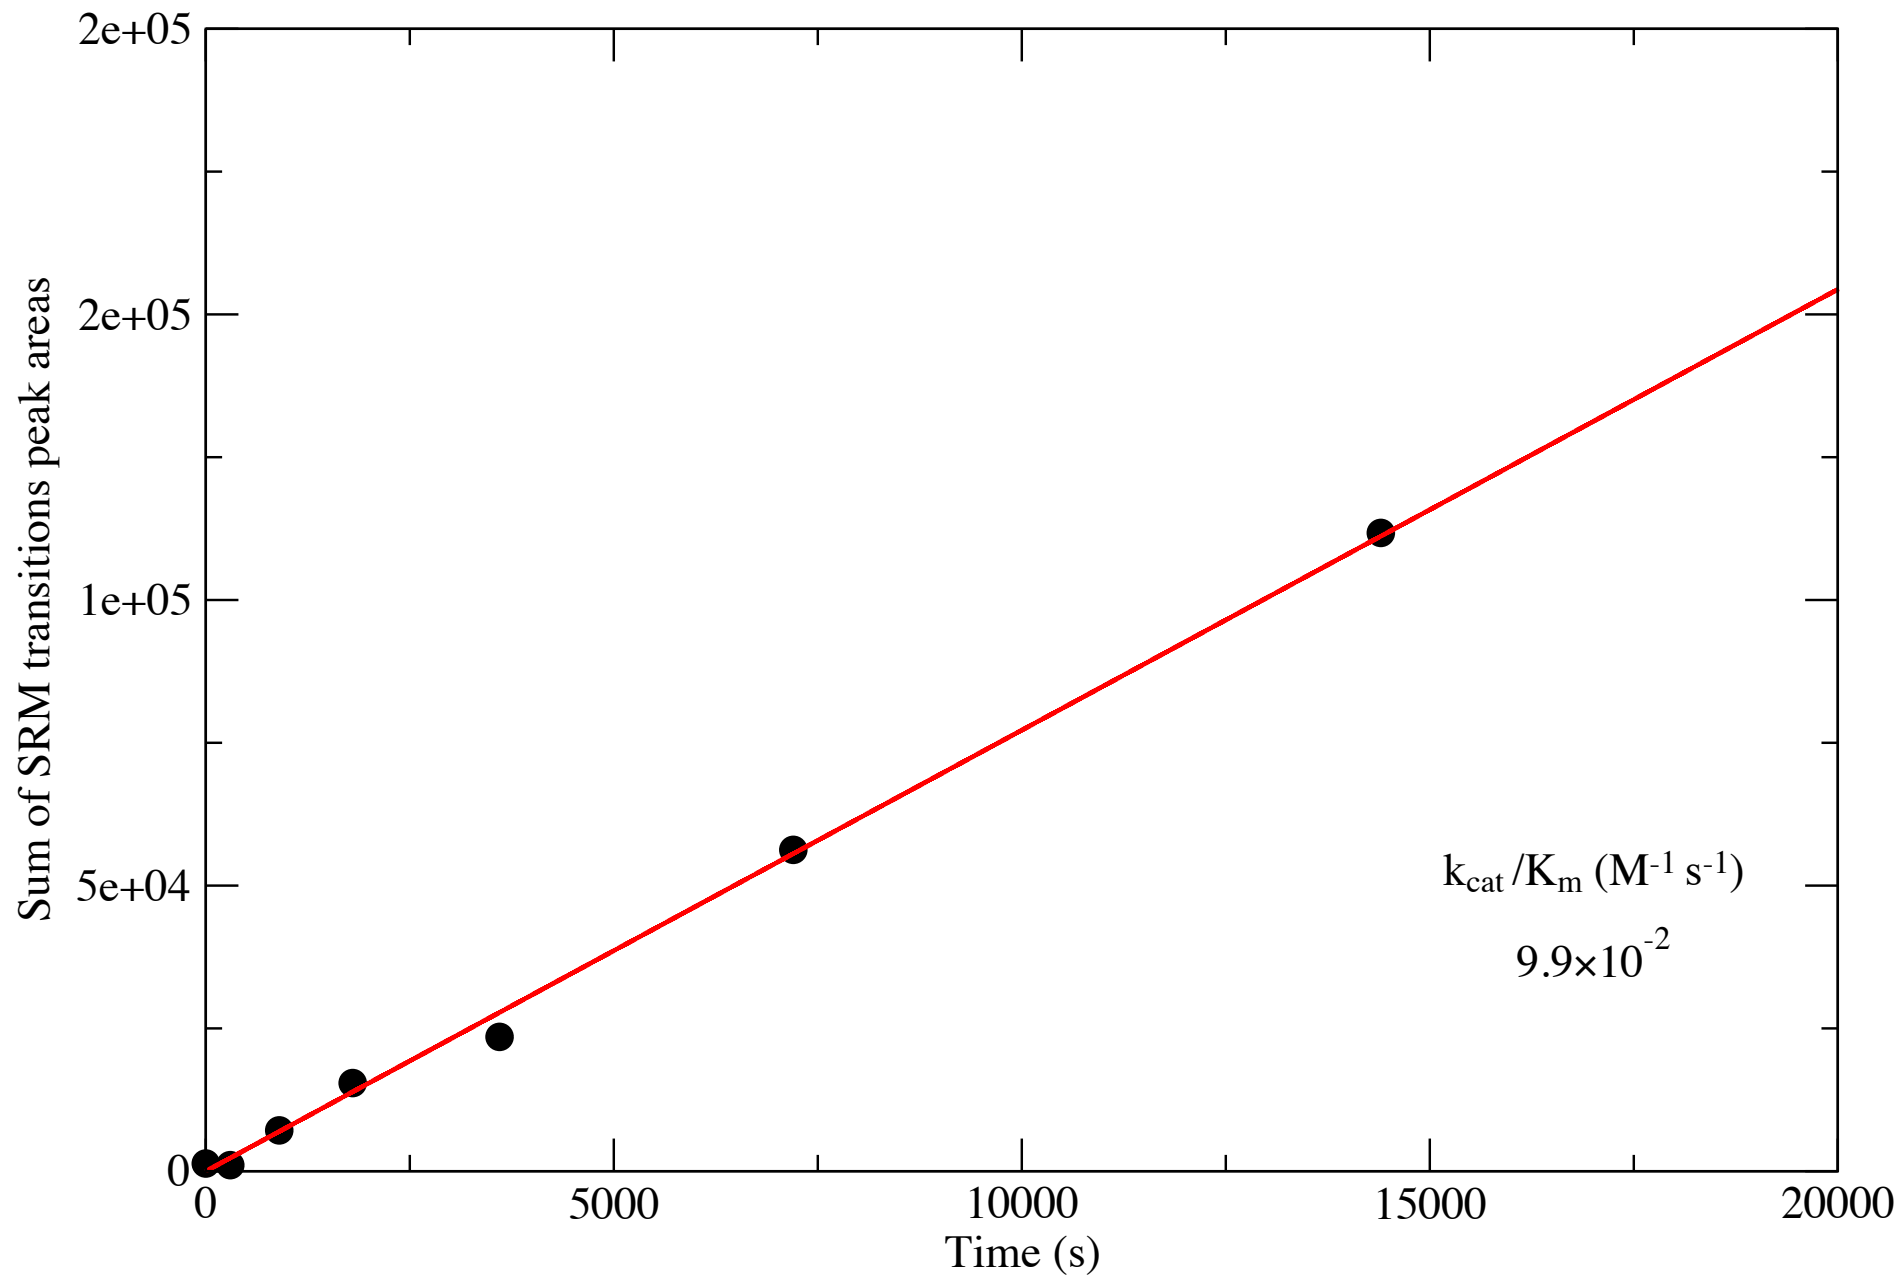

# TIF1B\_HUMAN (GADSTGVVAK)

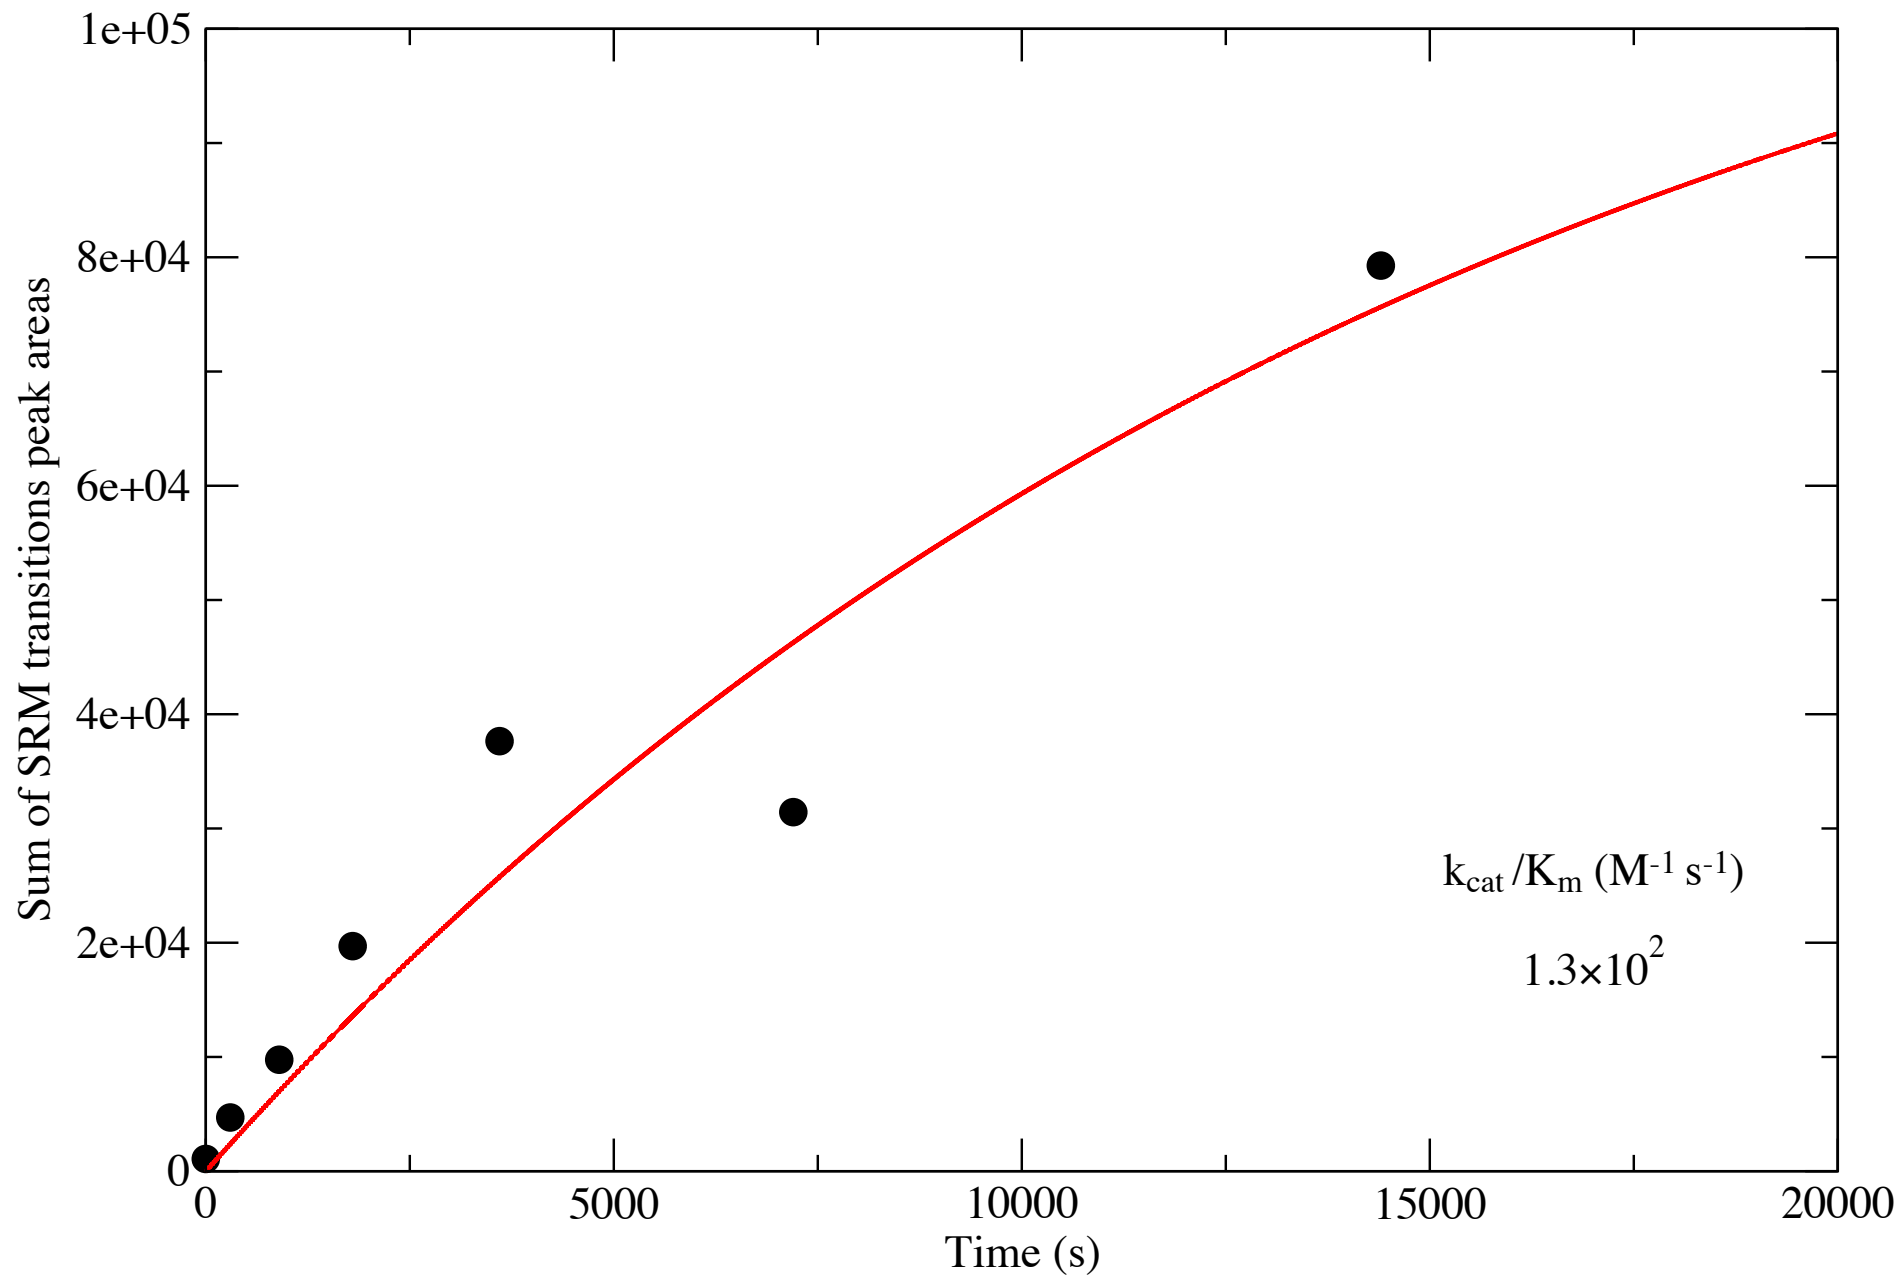

# TIM\_HUMAN (SVVPFDAASEVPVEEQR)

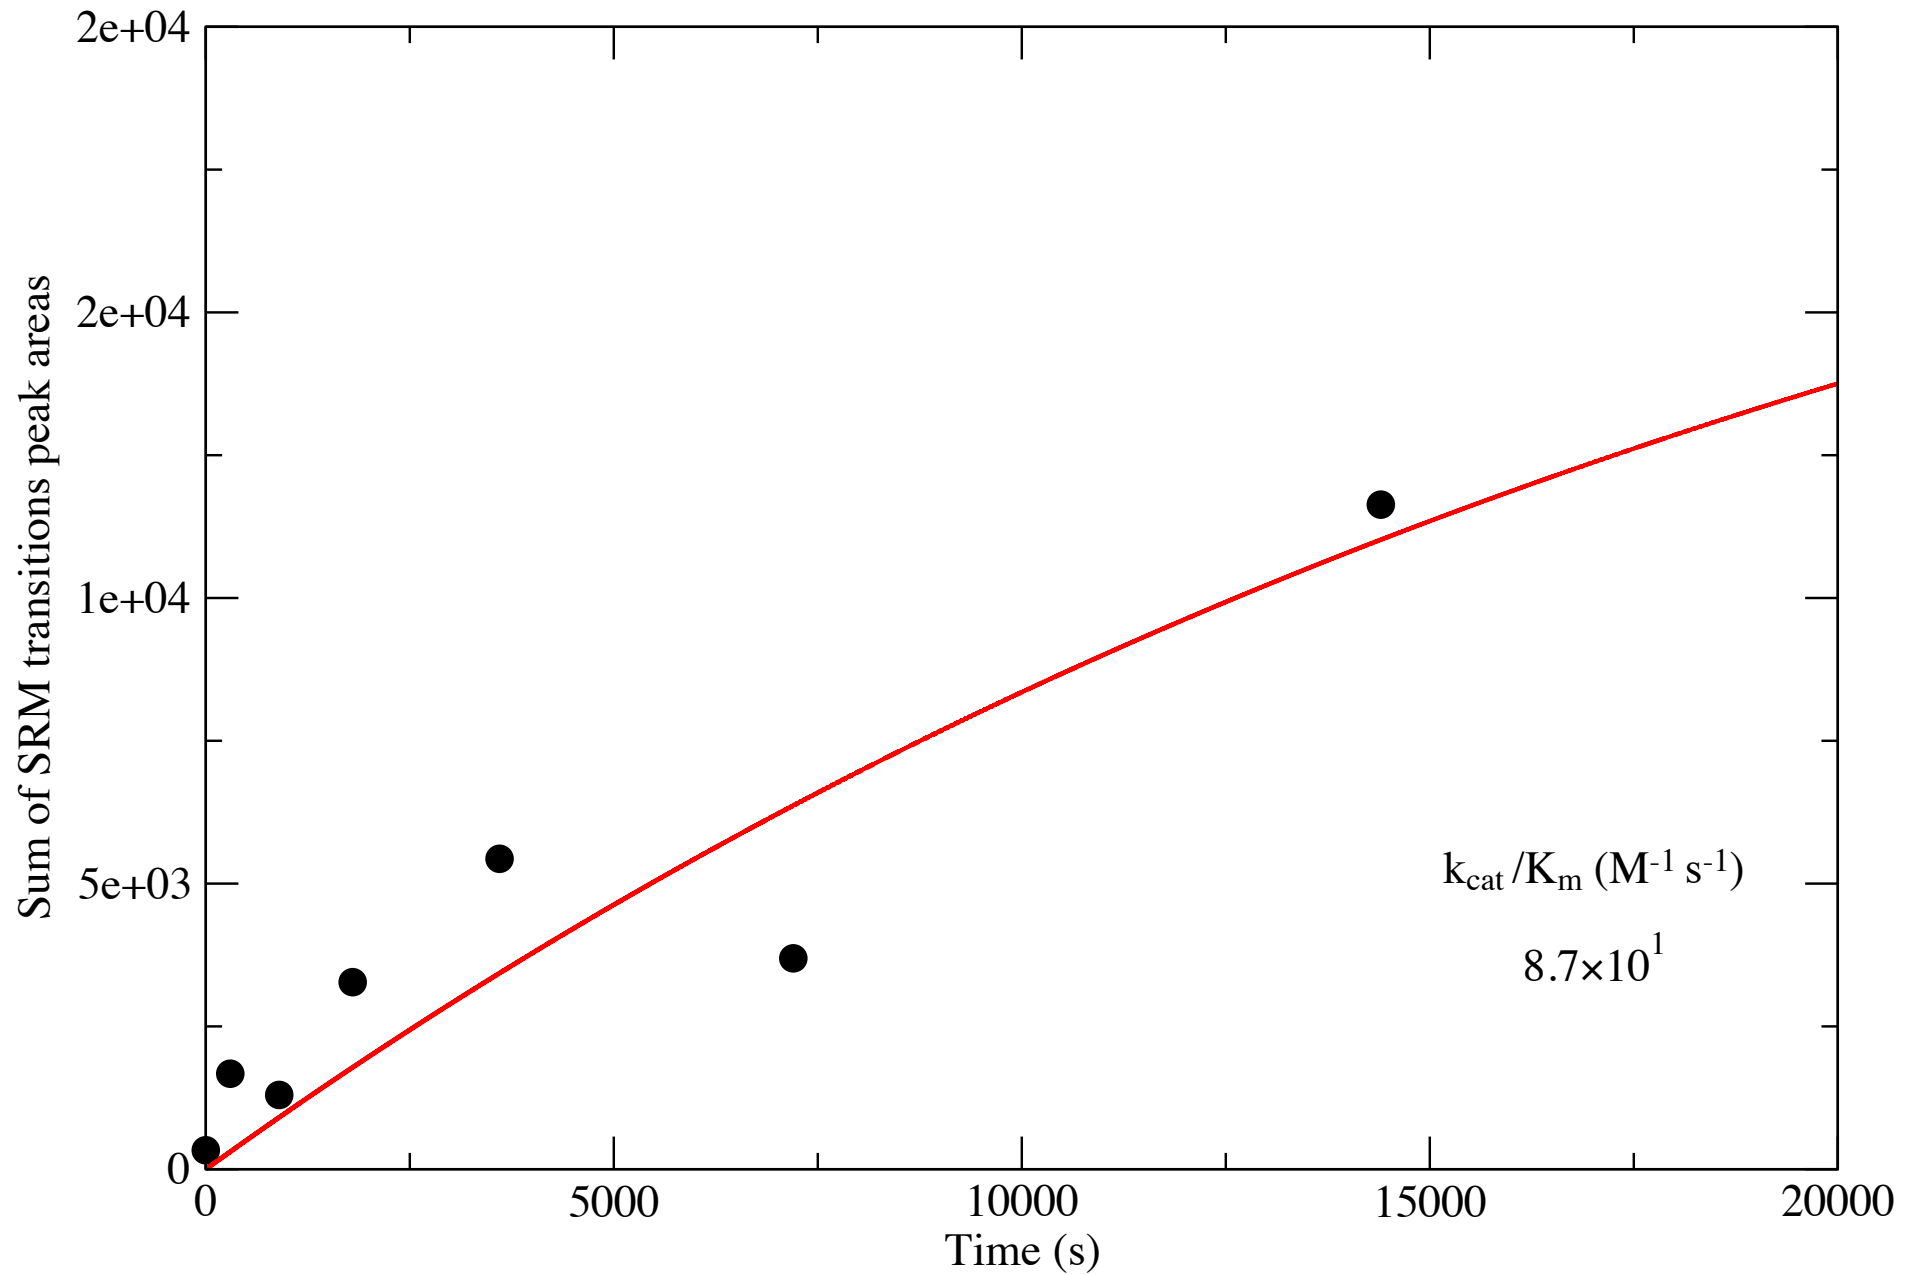

# TOM1\_HUMAN (MLSPIHTPQR)

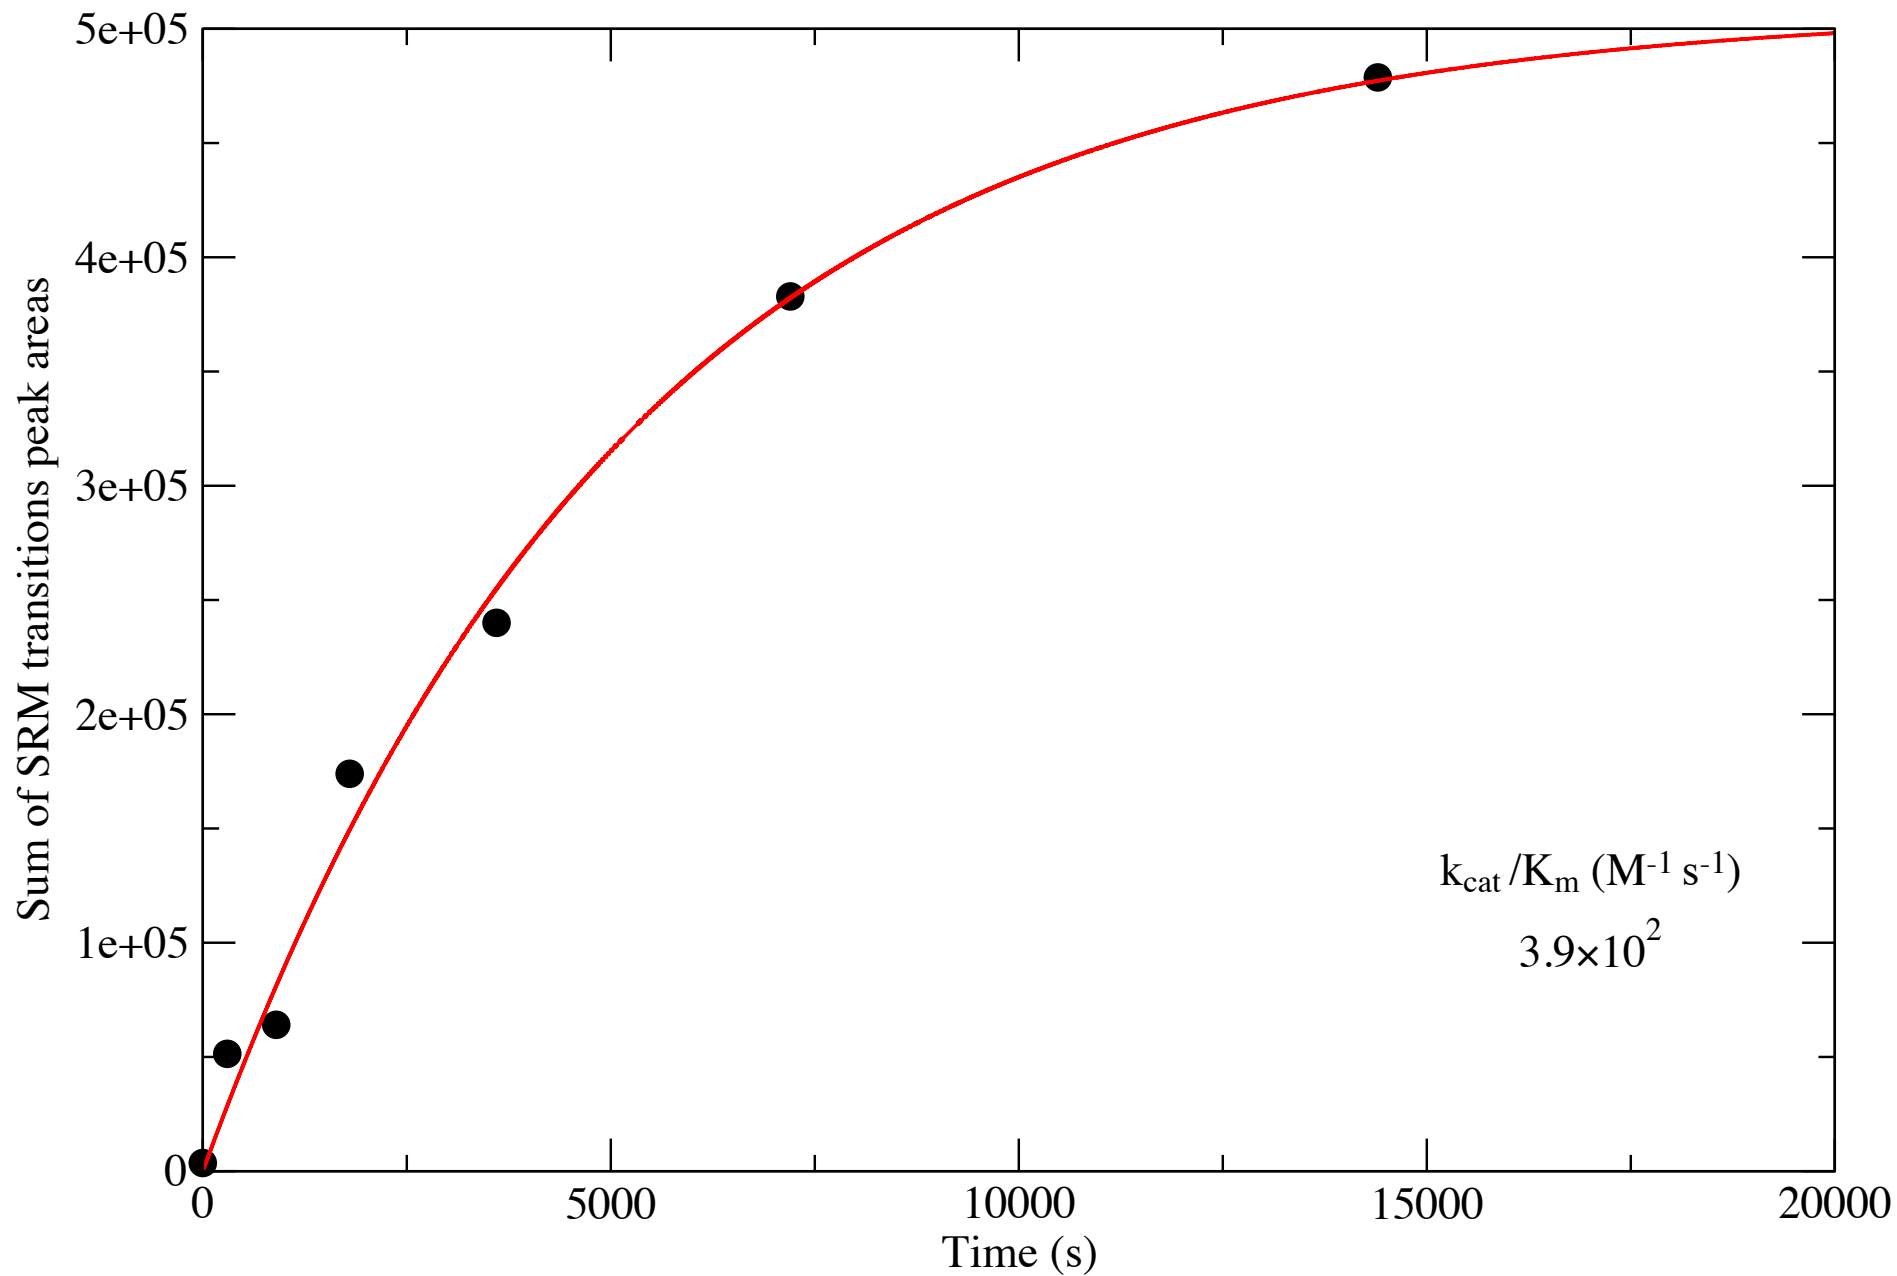



# TOP2B\_HUMAN (SASVFSPSFGLK)

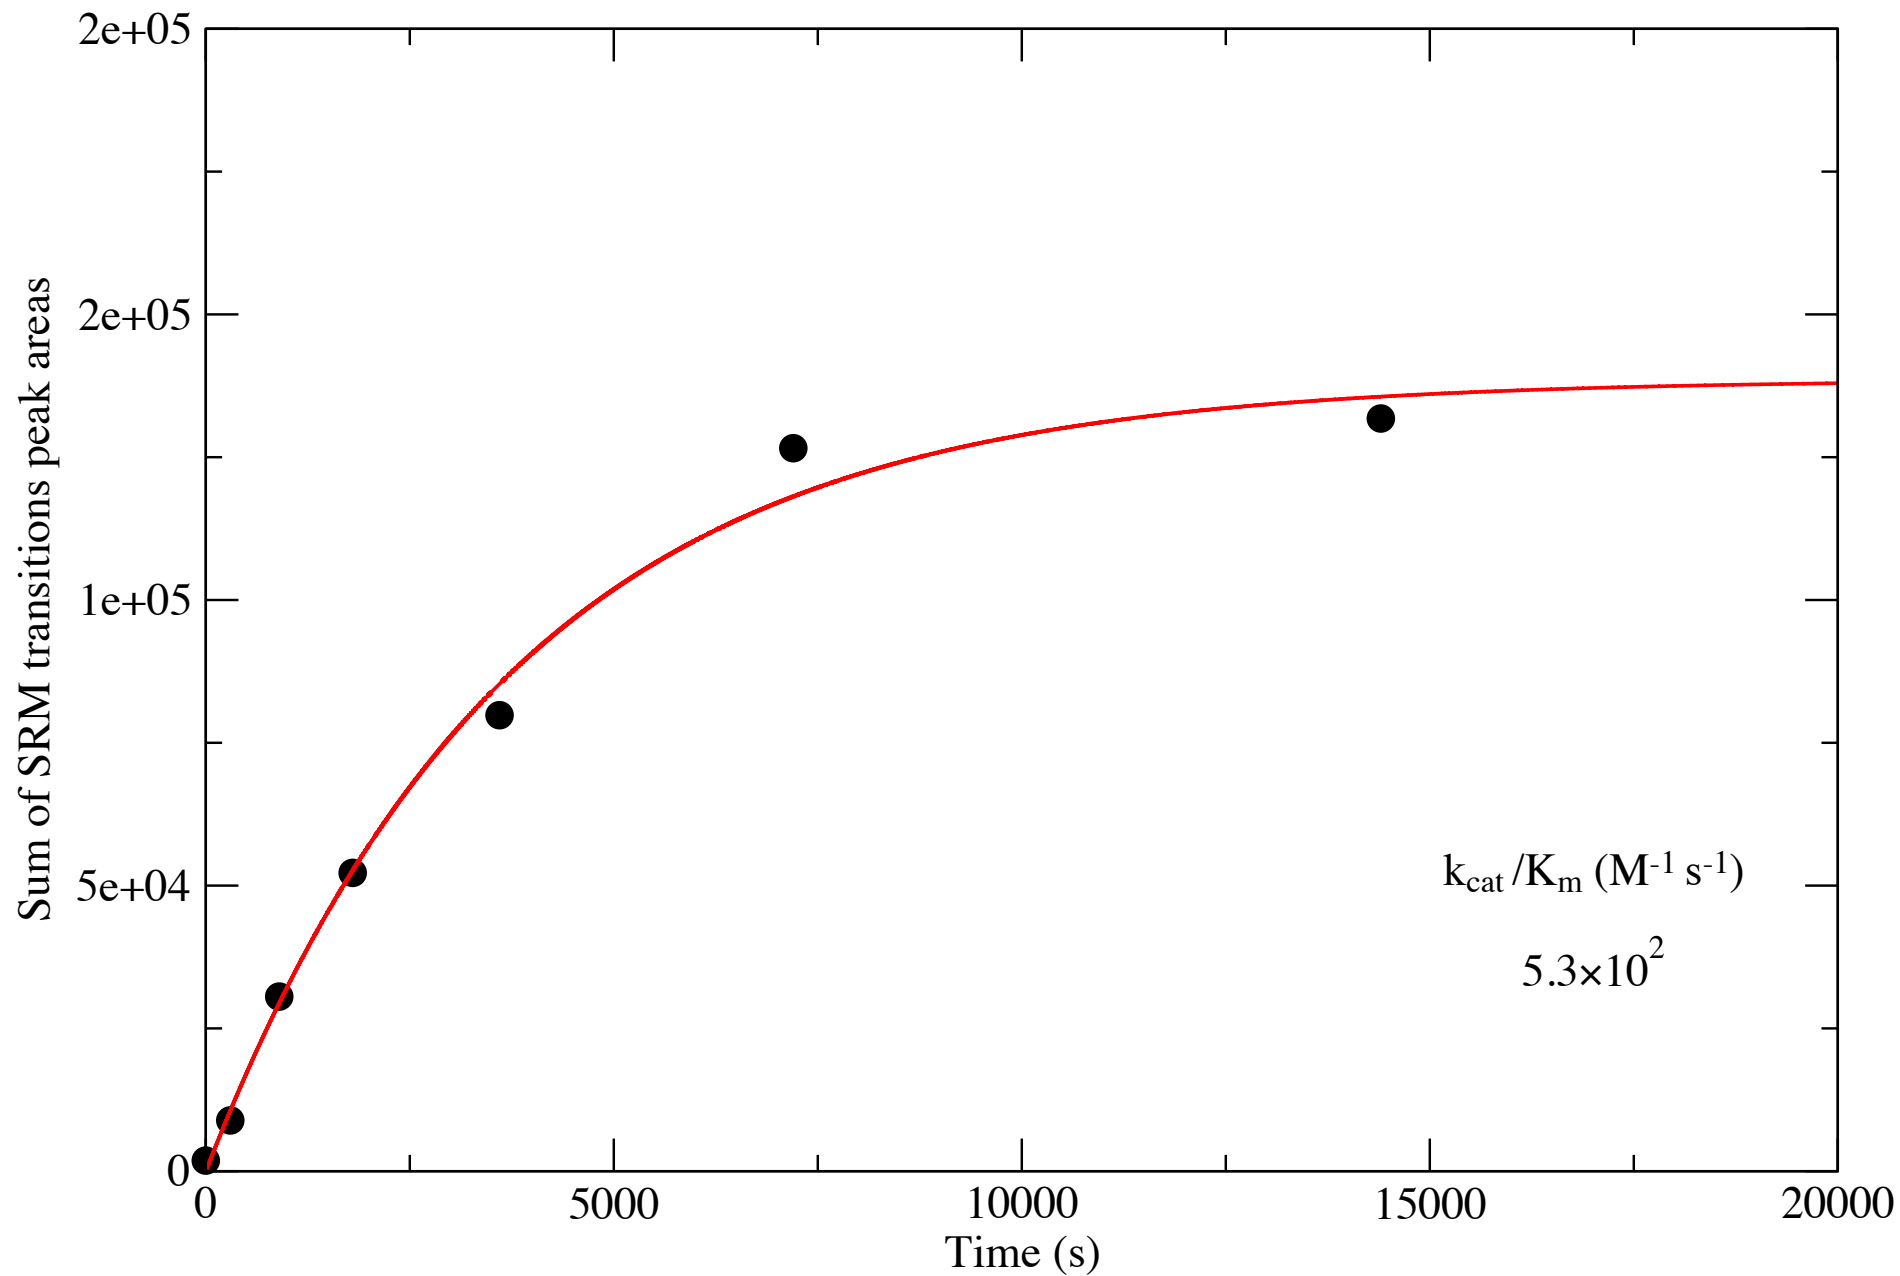

# TP53B\_HUMAN (SSQPSLPLVR)

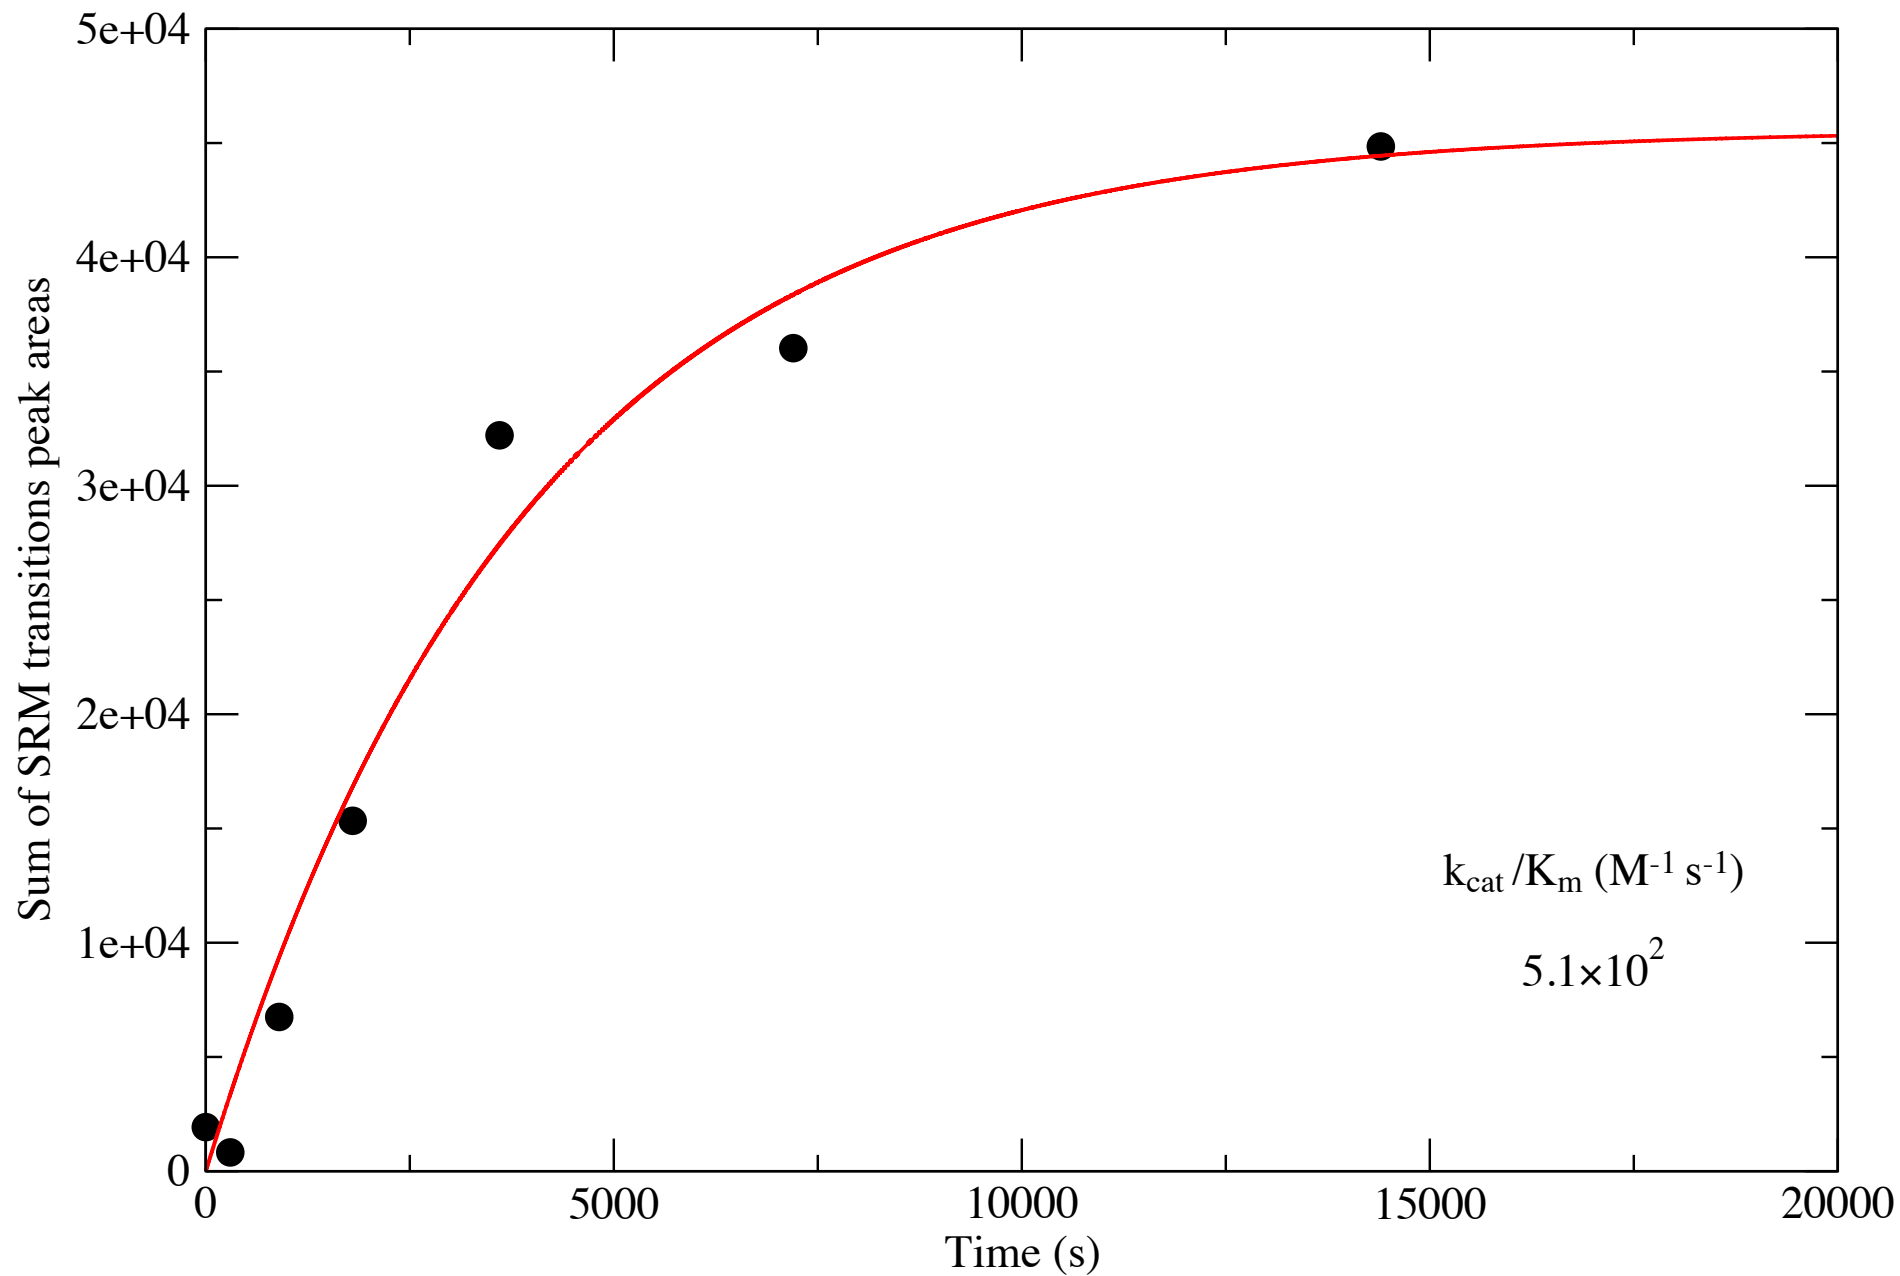

# TPC10\_HUMAN (SLSVDKHGDDQPDSSSLK)

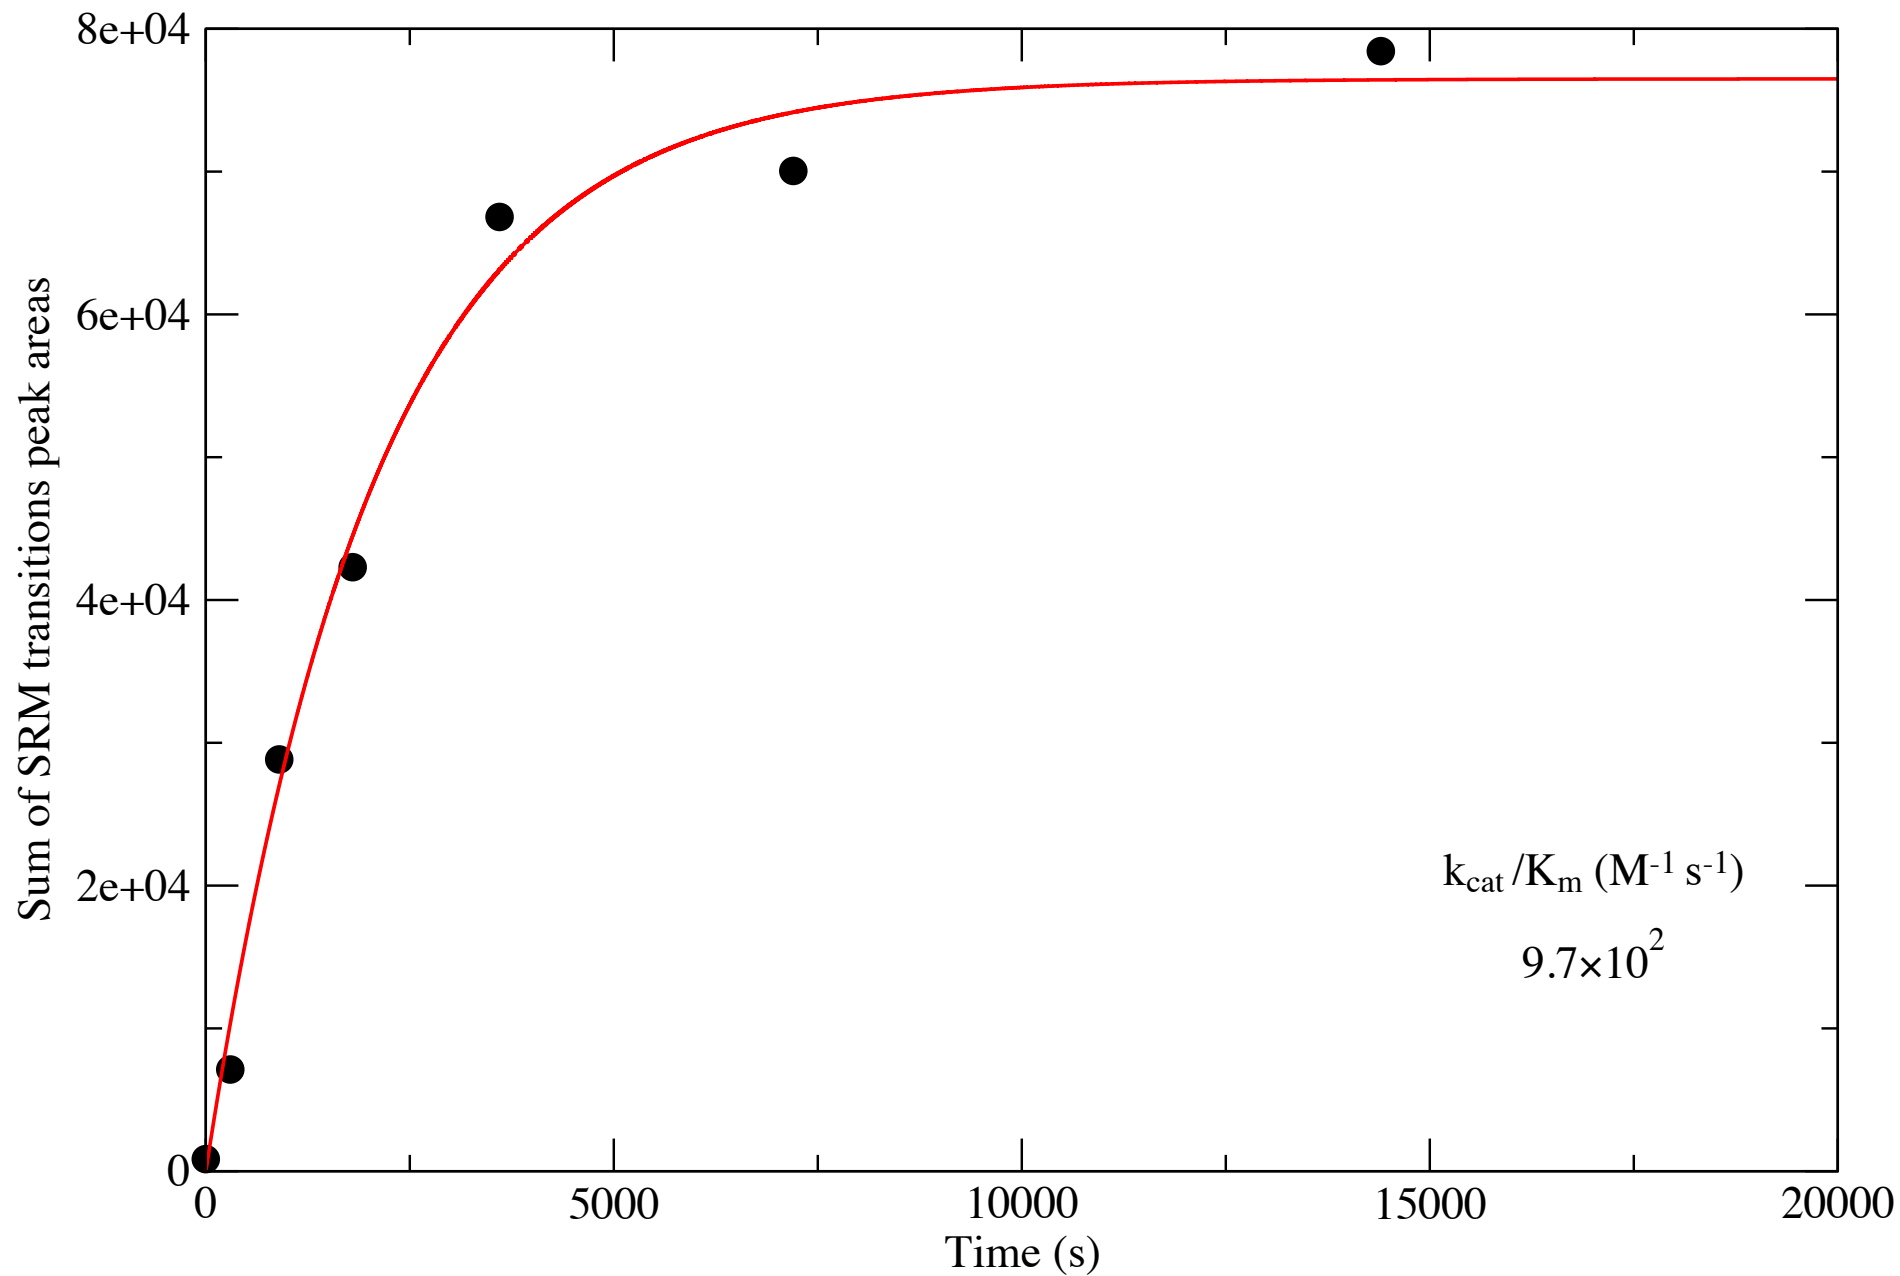

# TPPC8\_HUMAN (GLPNNFR)

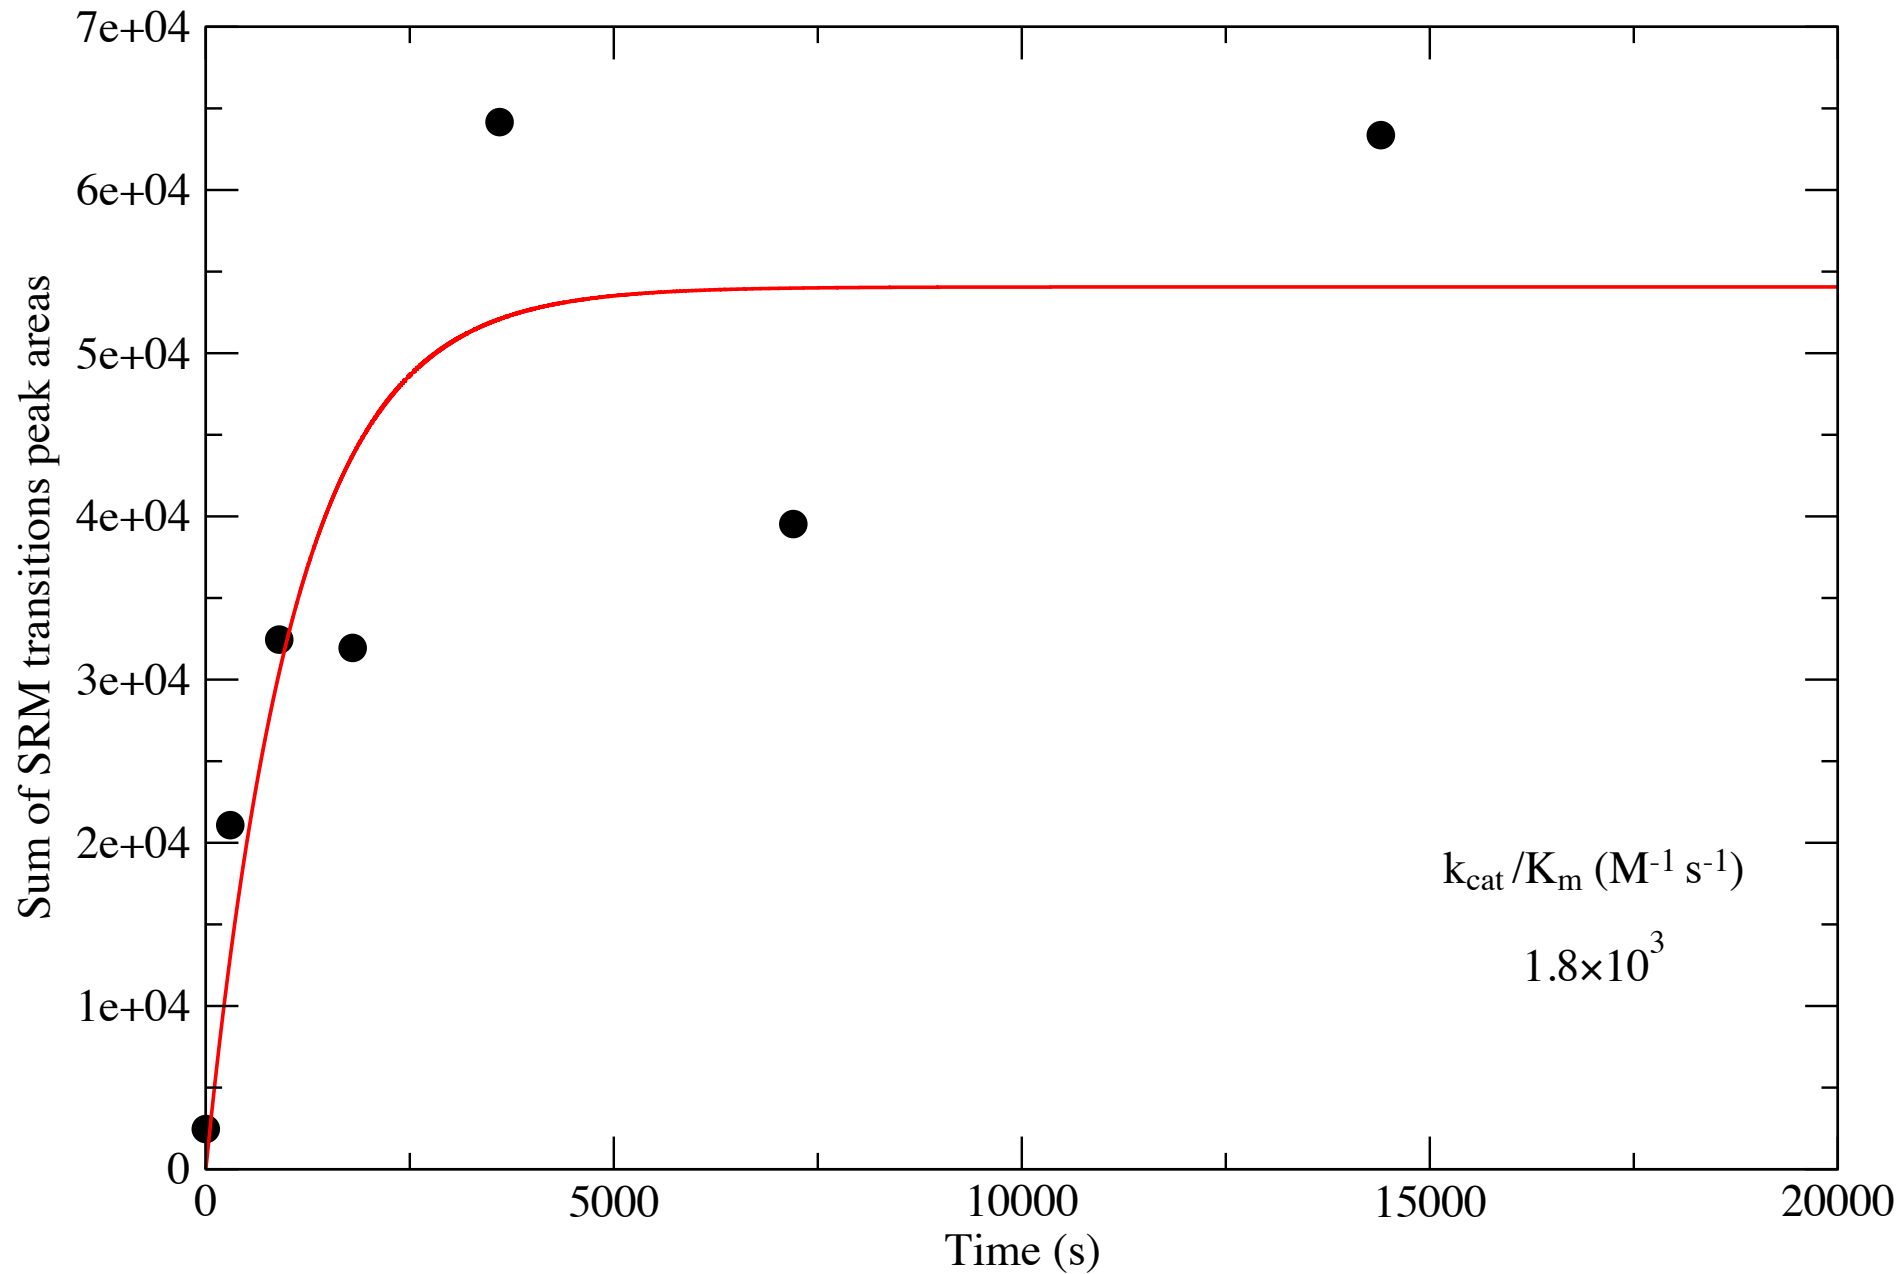

# TR150\_HUMAN (SFDEDLARPSGLLAQER)

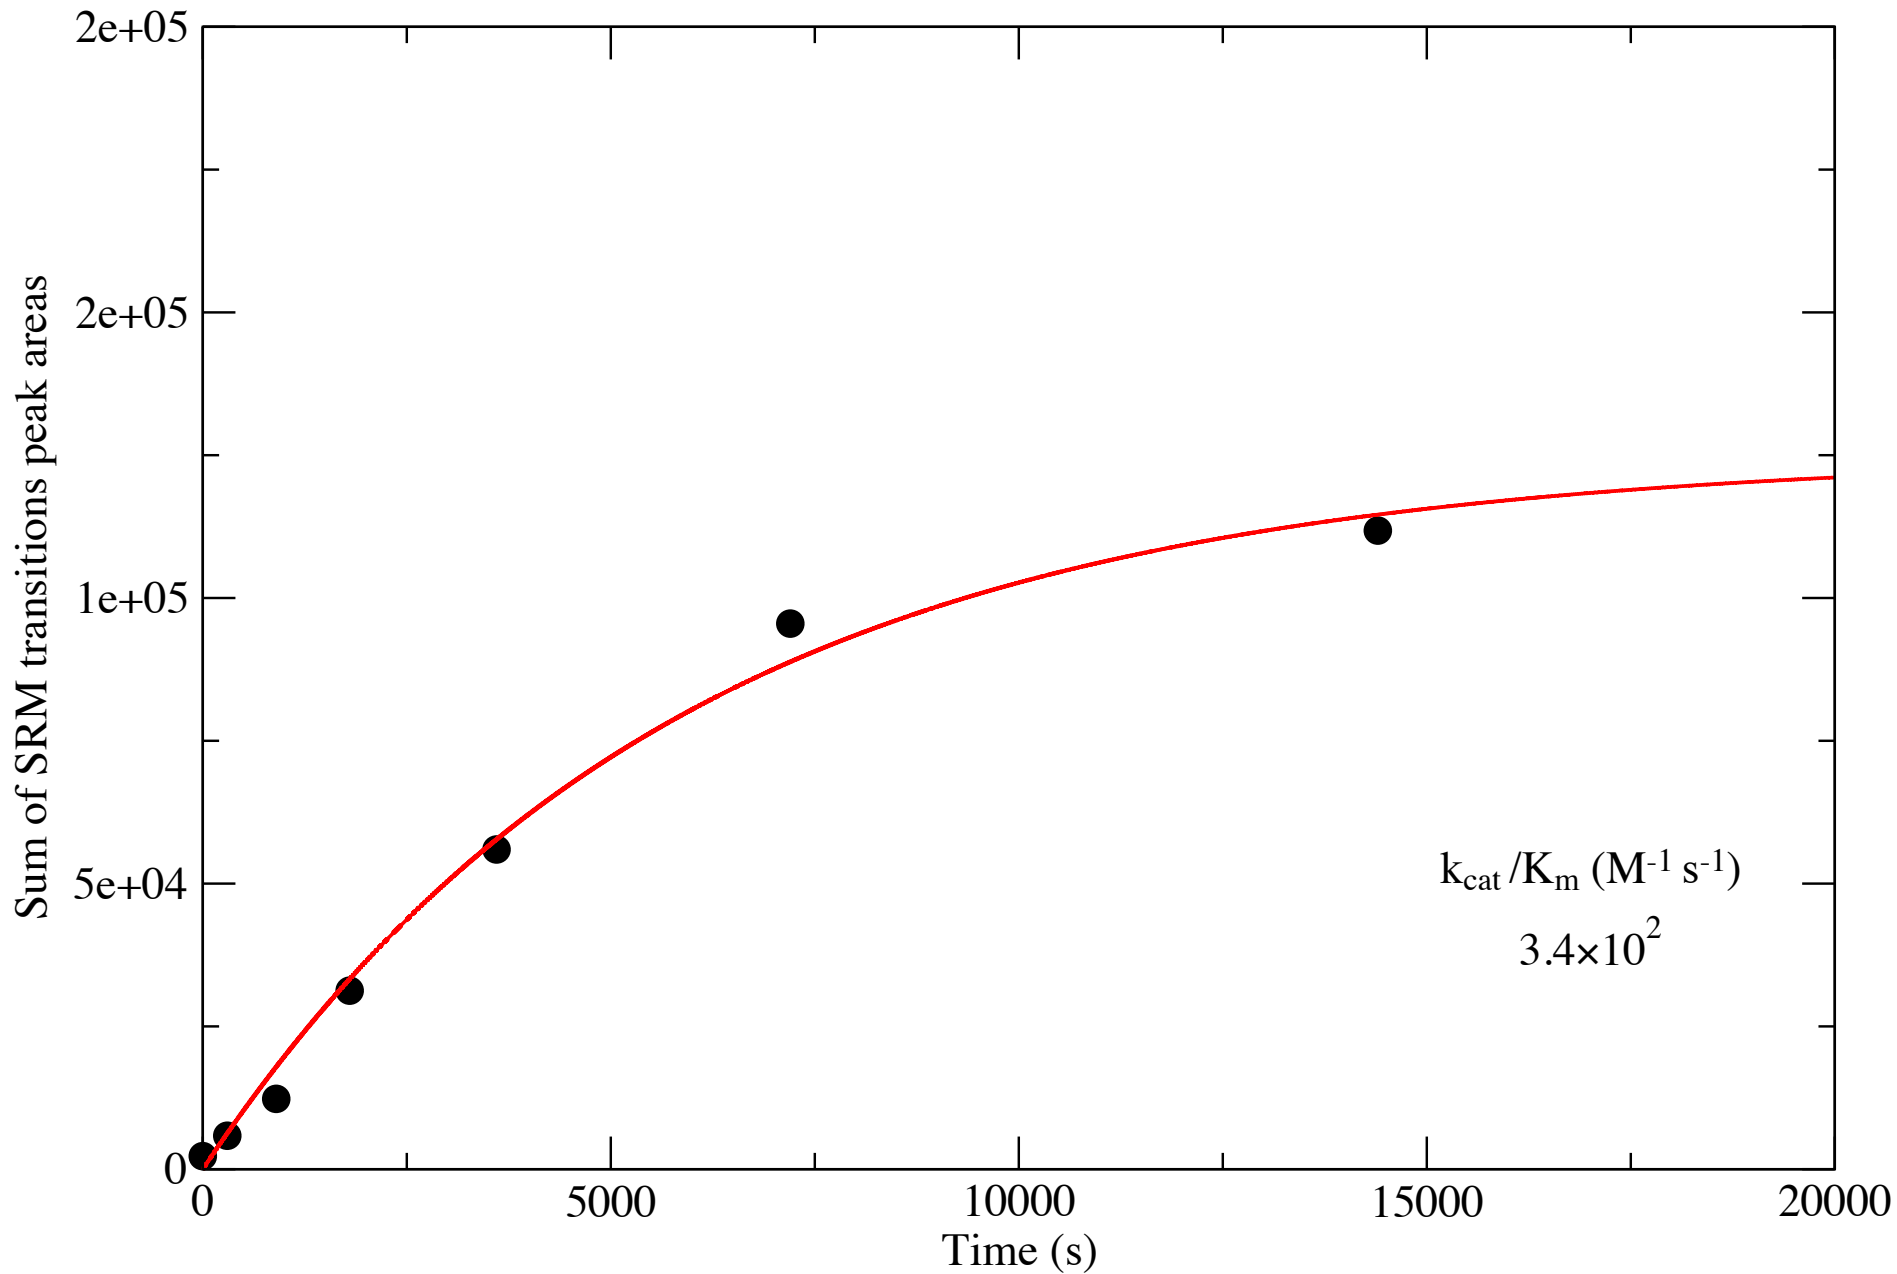

# TRM1L\_HUMAN (SAPTPASAPAPAPALAQAPALSPSLASAPEEAK)

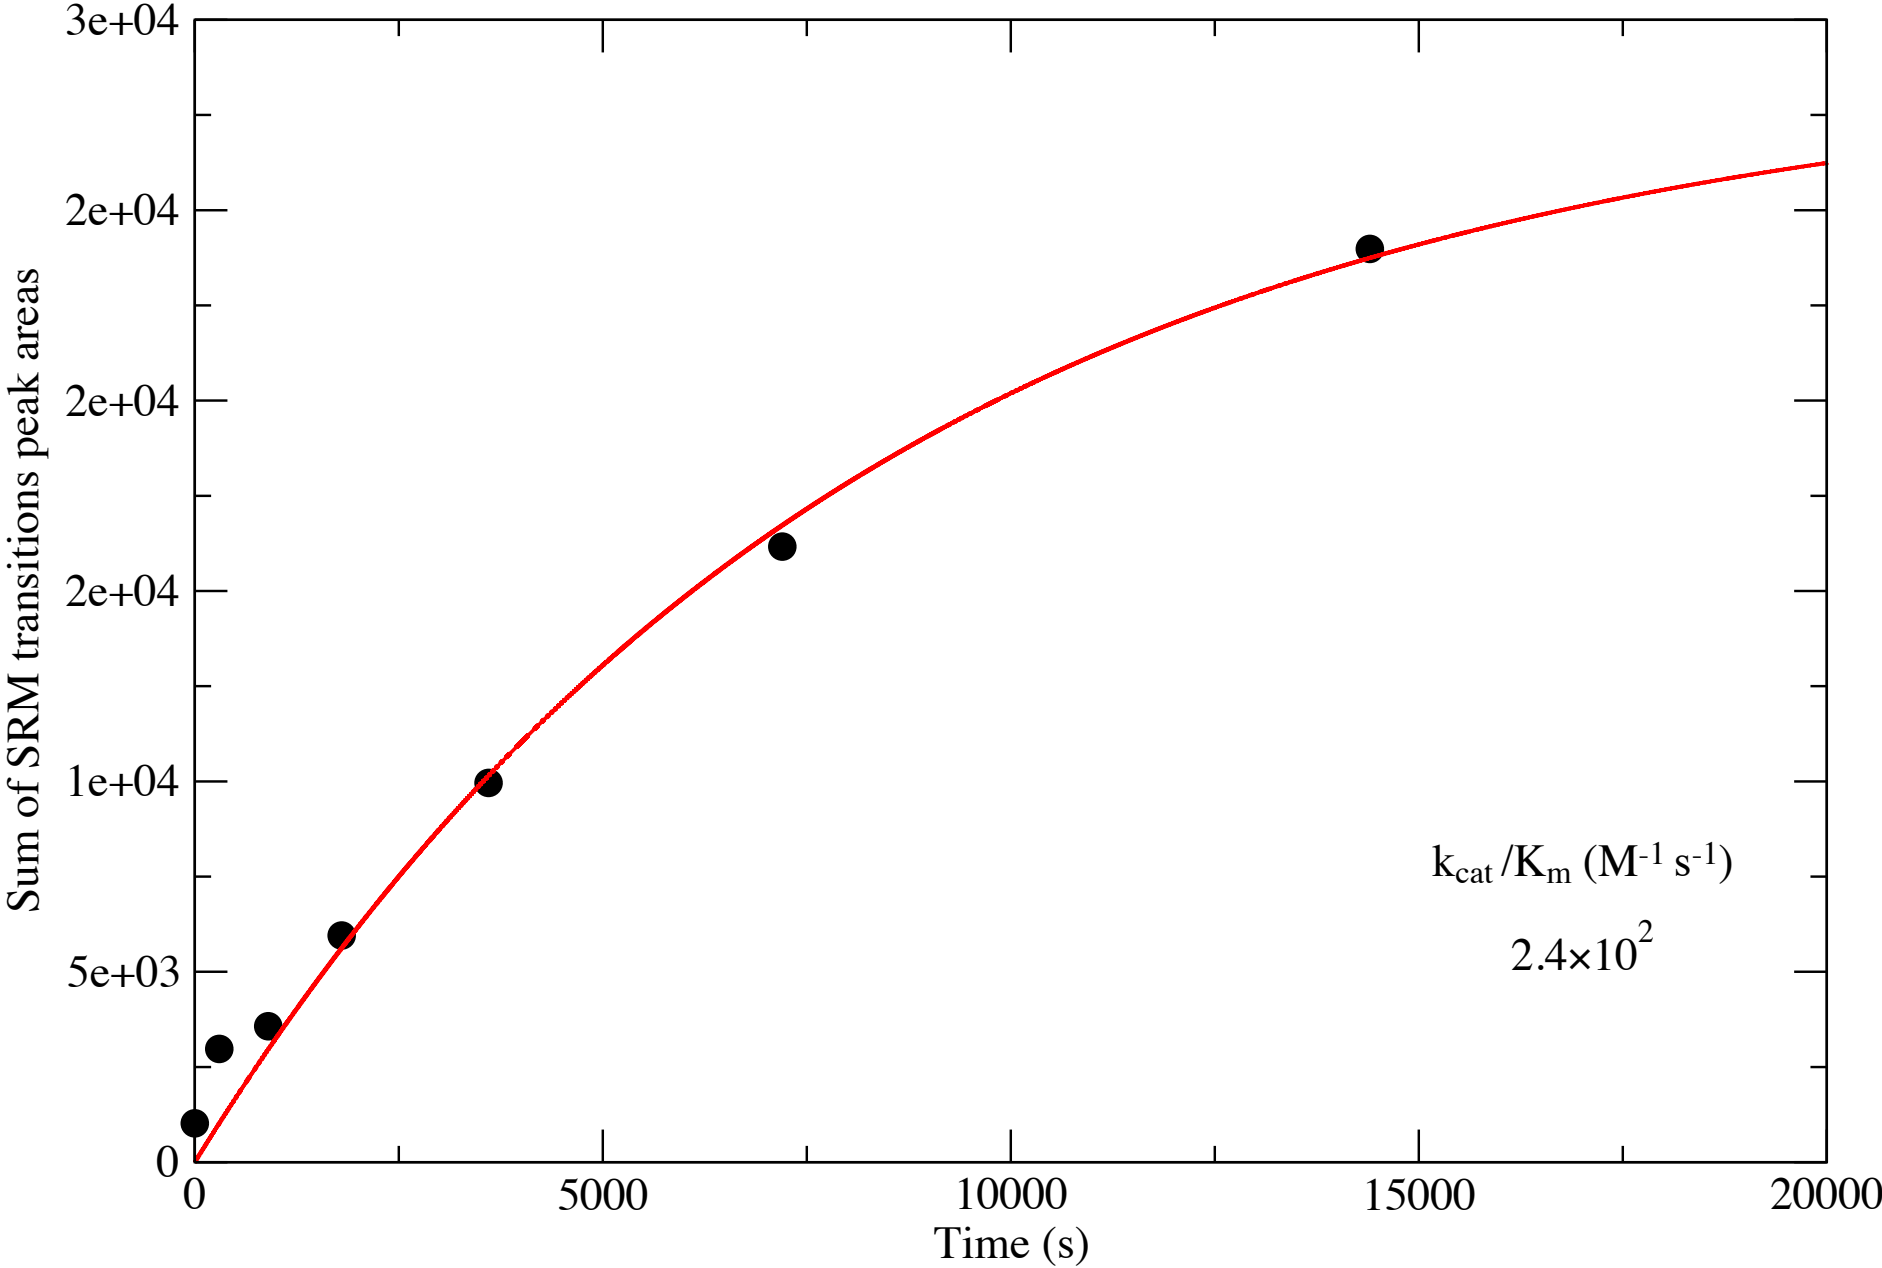

# TSC1\_HUMAN (GVPSTSPMEVLDR)

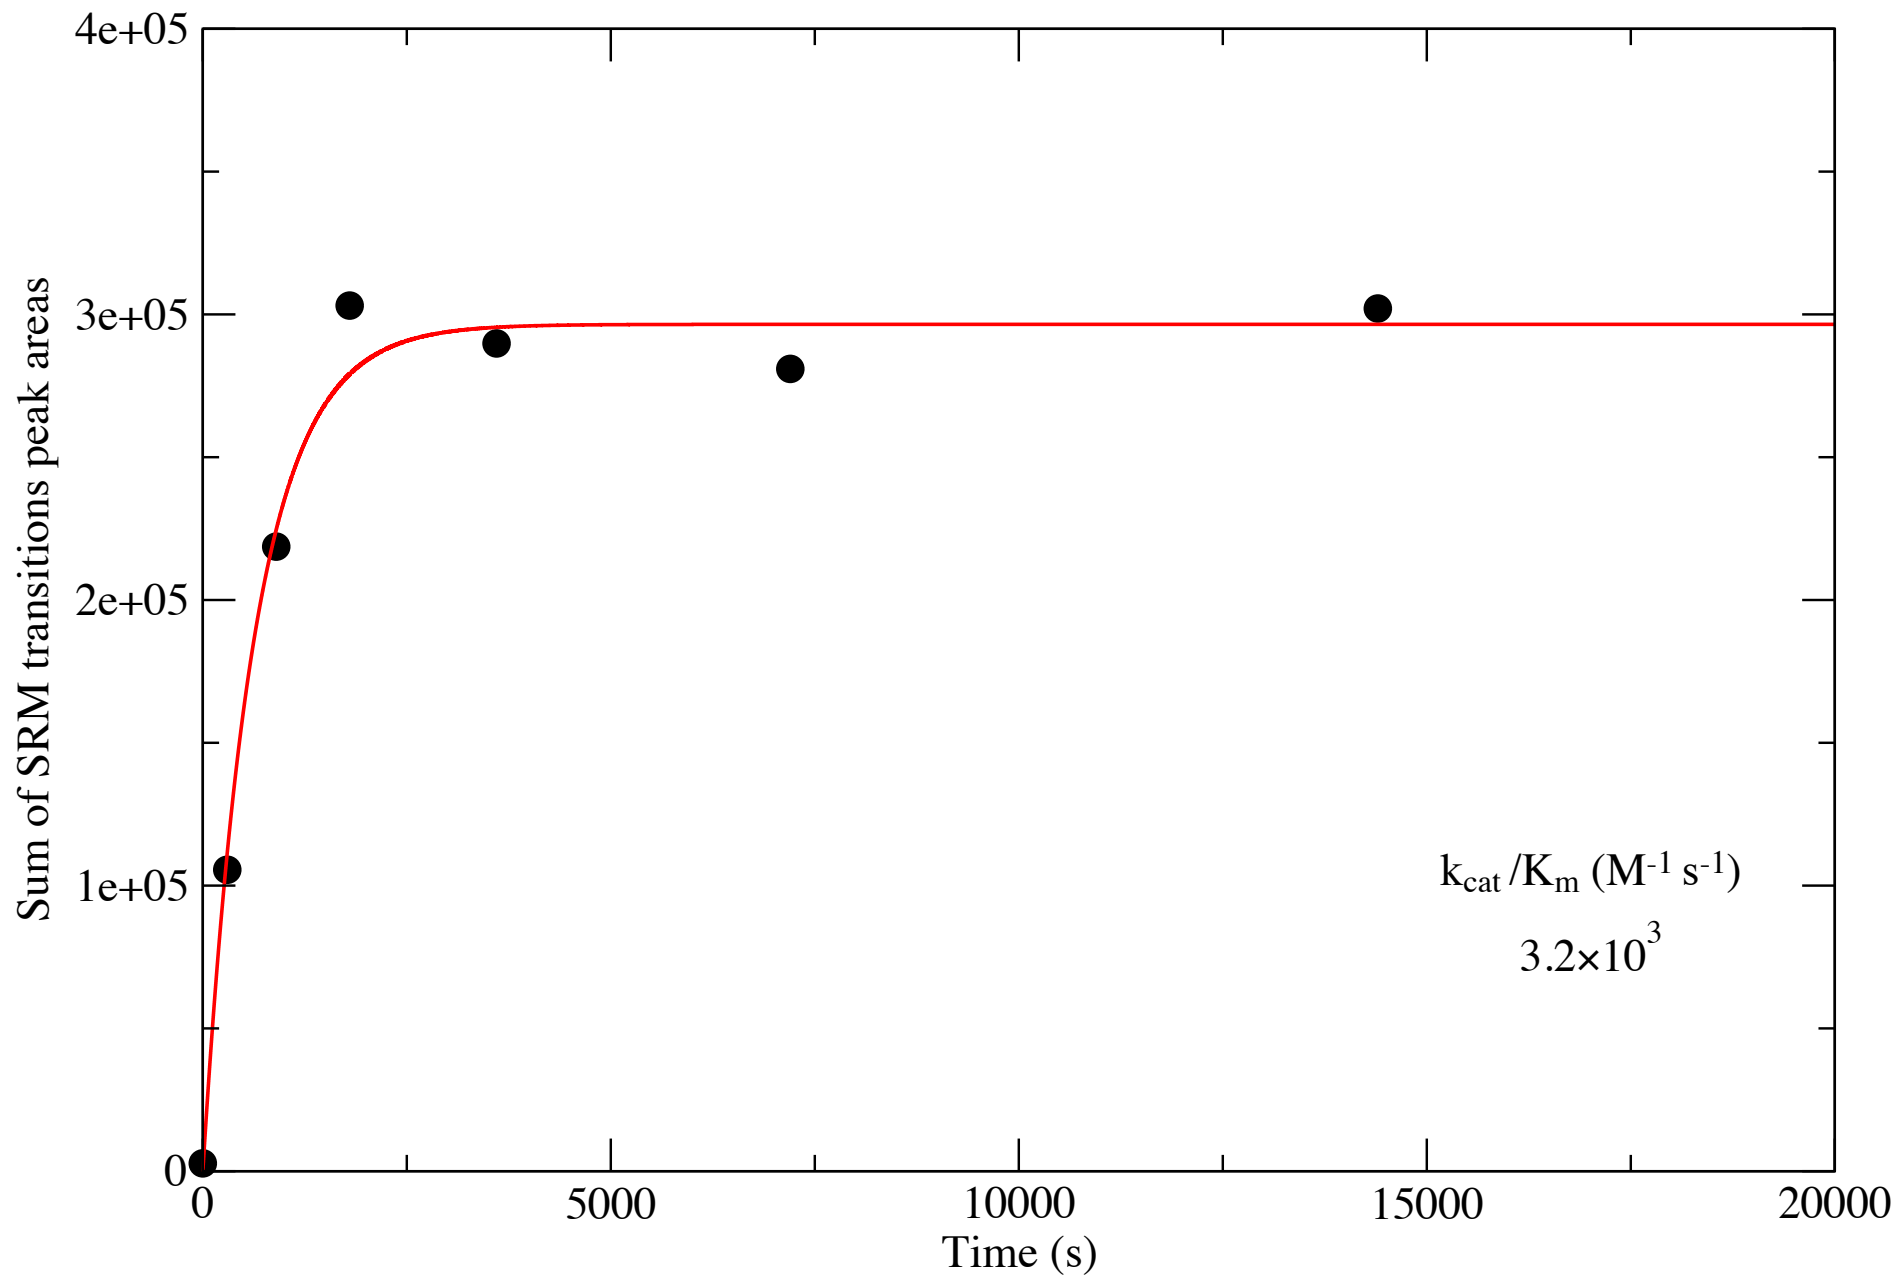

# TSR1\_HUMAN (AVDDMEEGLK)

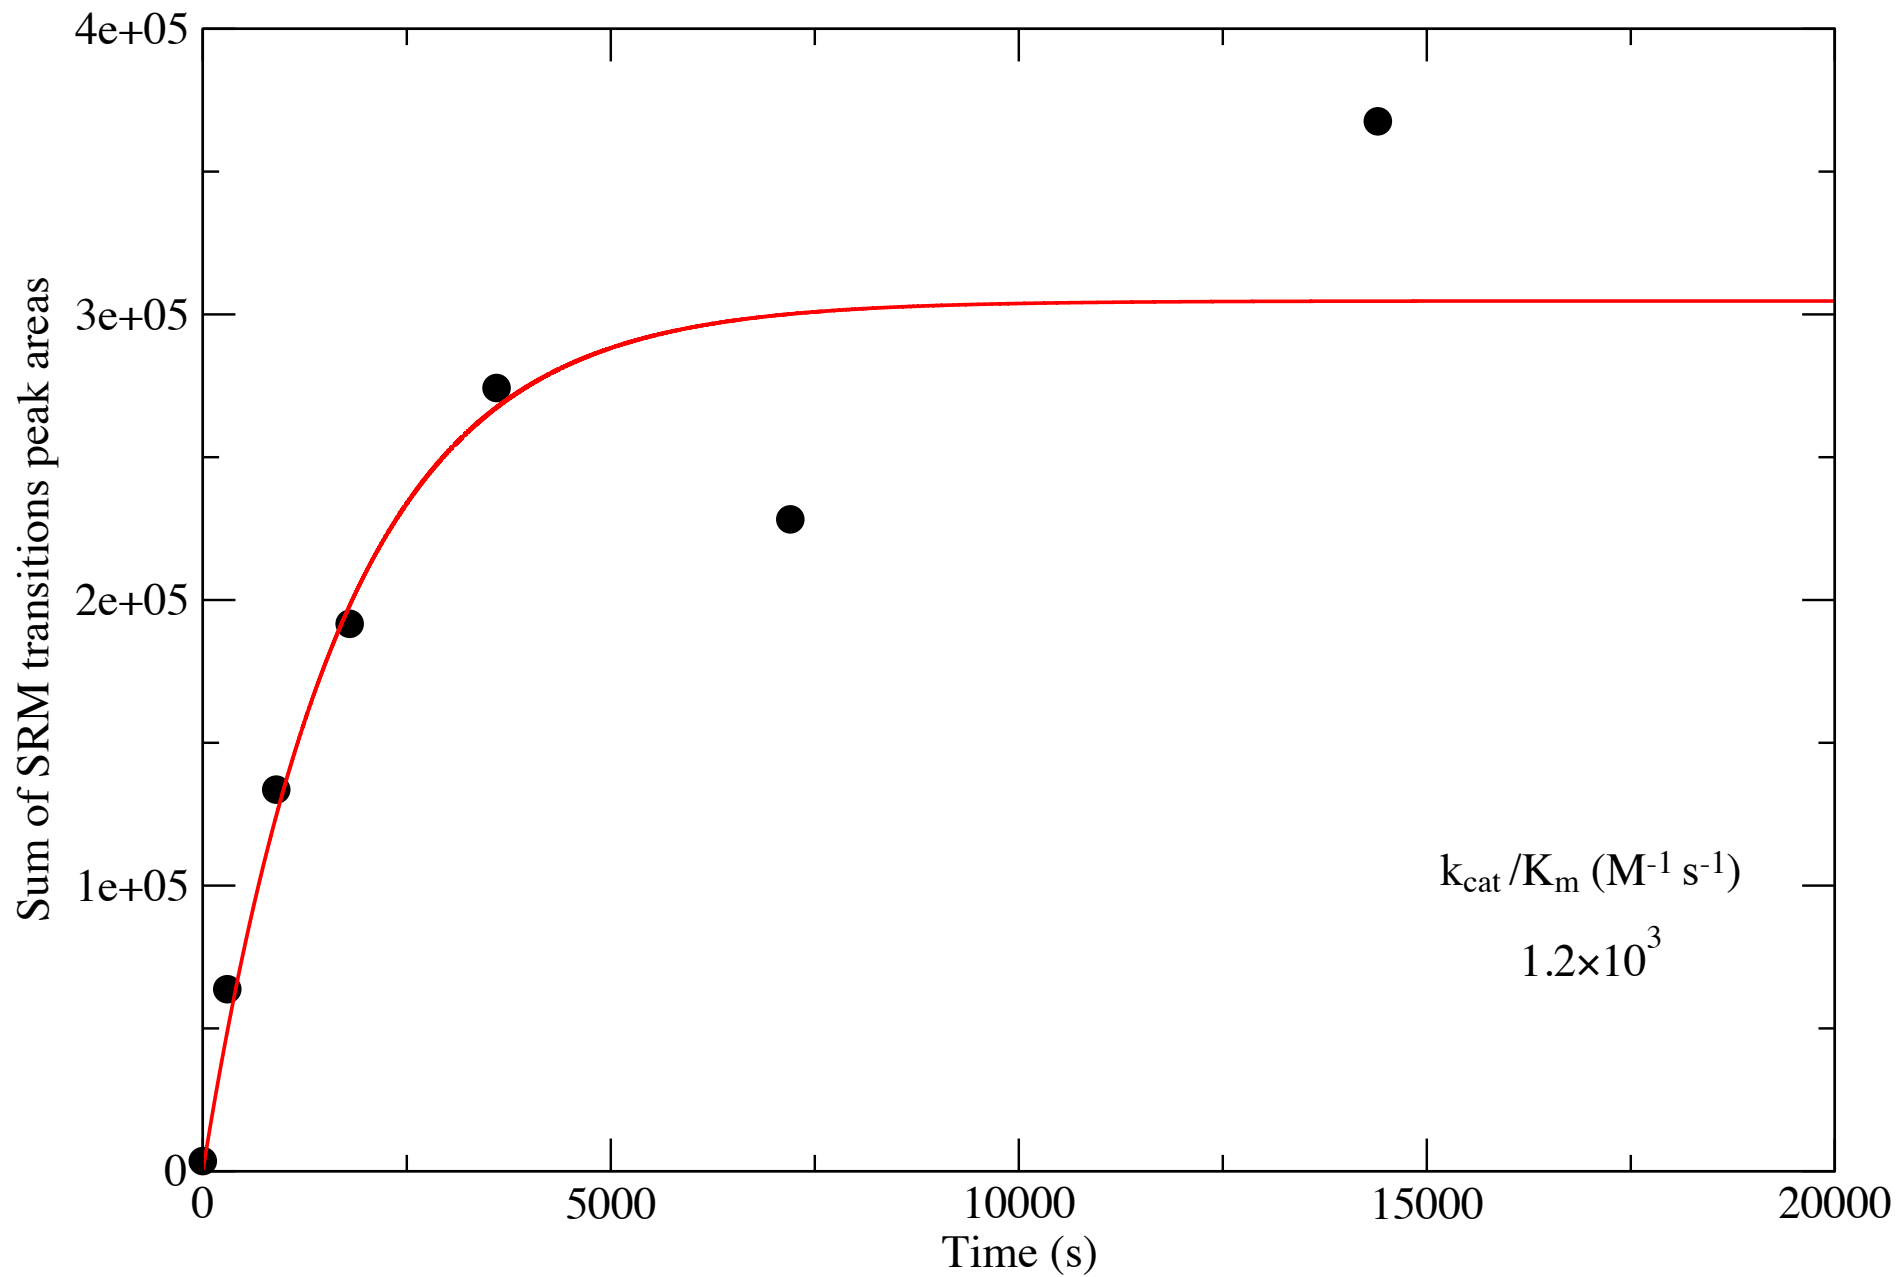



# TTC4\_HUMAN (GLSTENPHGAR)

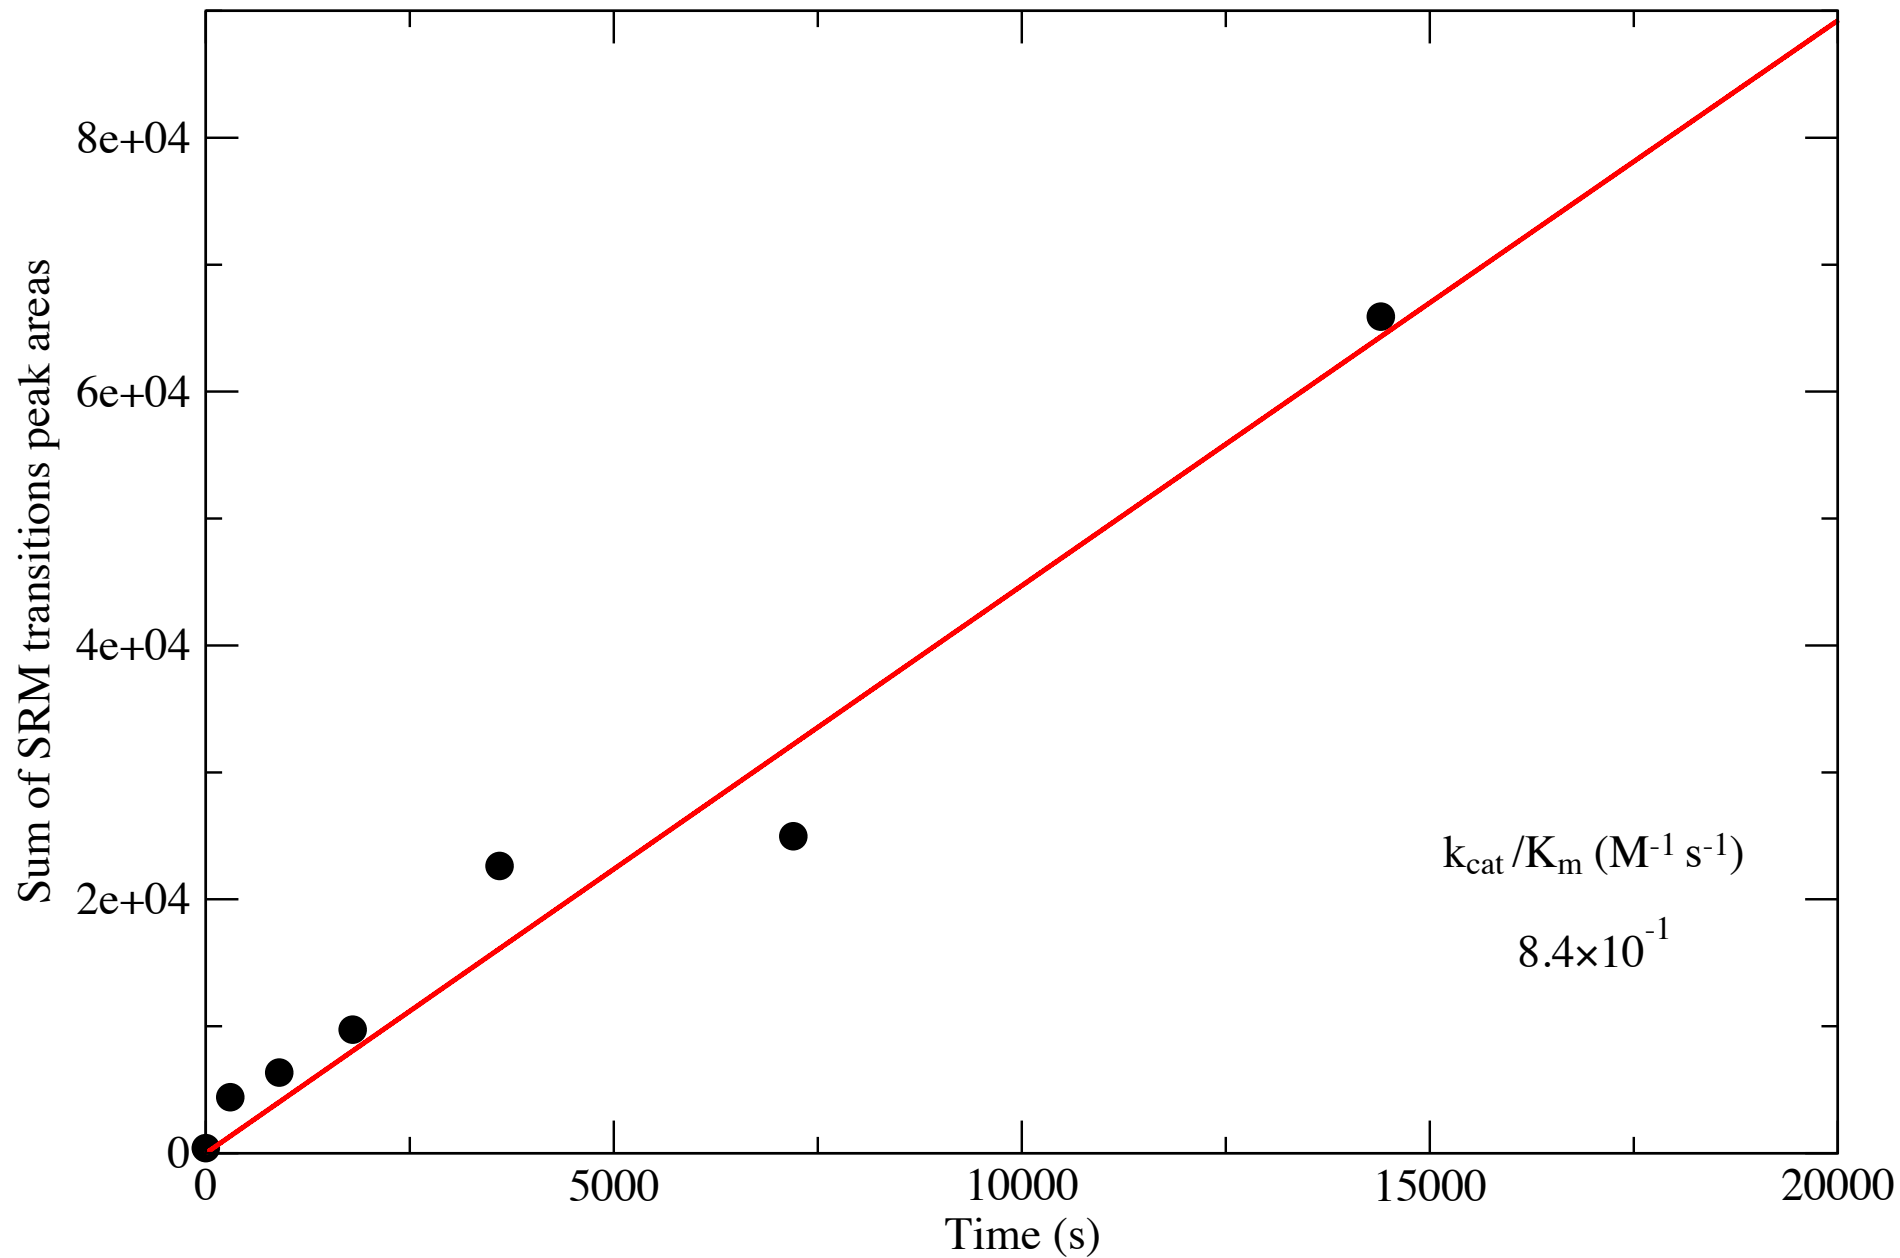

# TTI2\_HUMAN (SALEAPSQEDSNLSEELSHSAFGQAFSK)

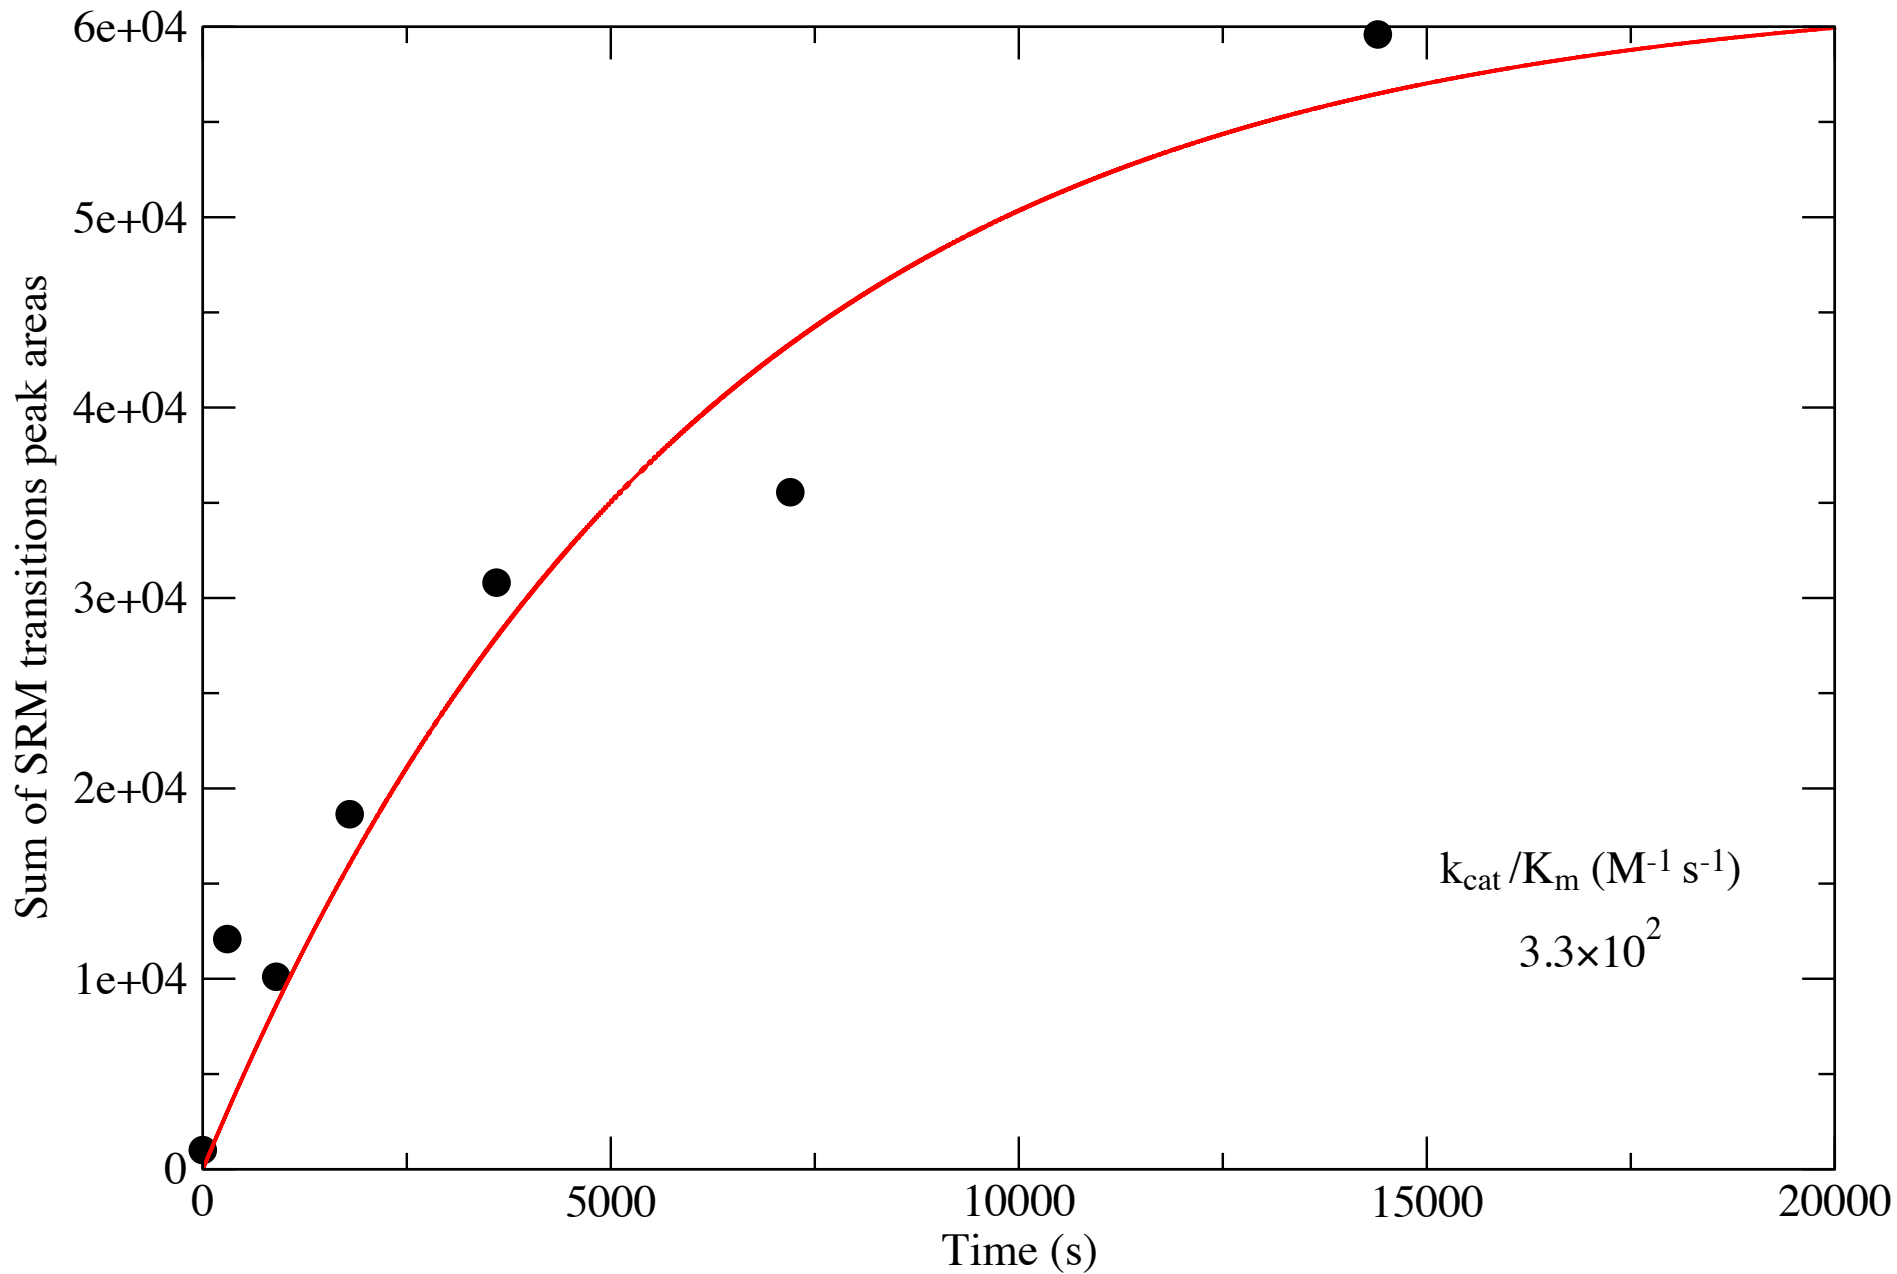

# UBAP2\_HUMAN (WTEDLSETK)

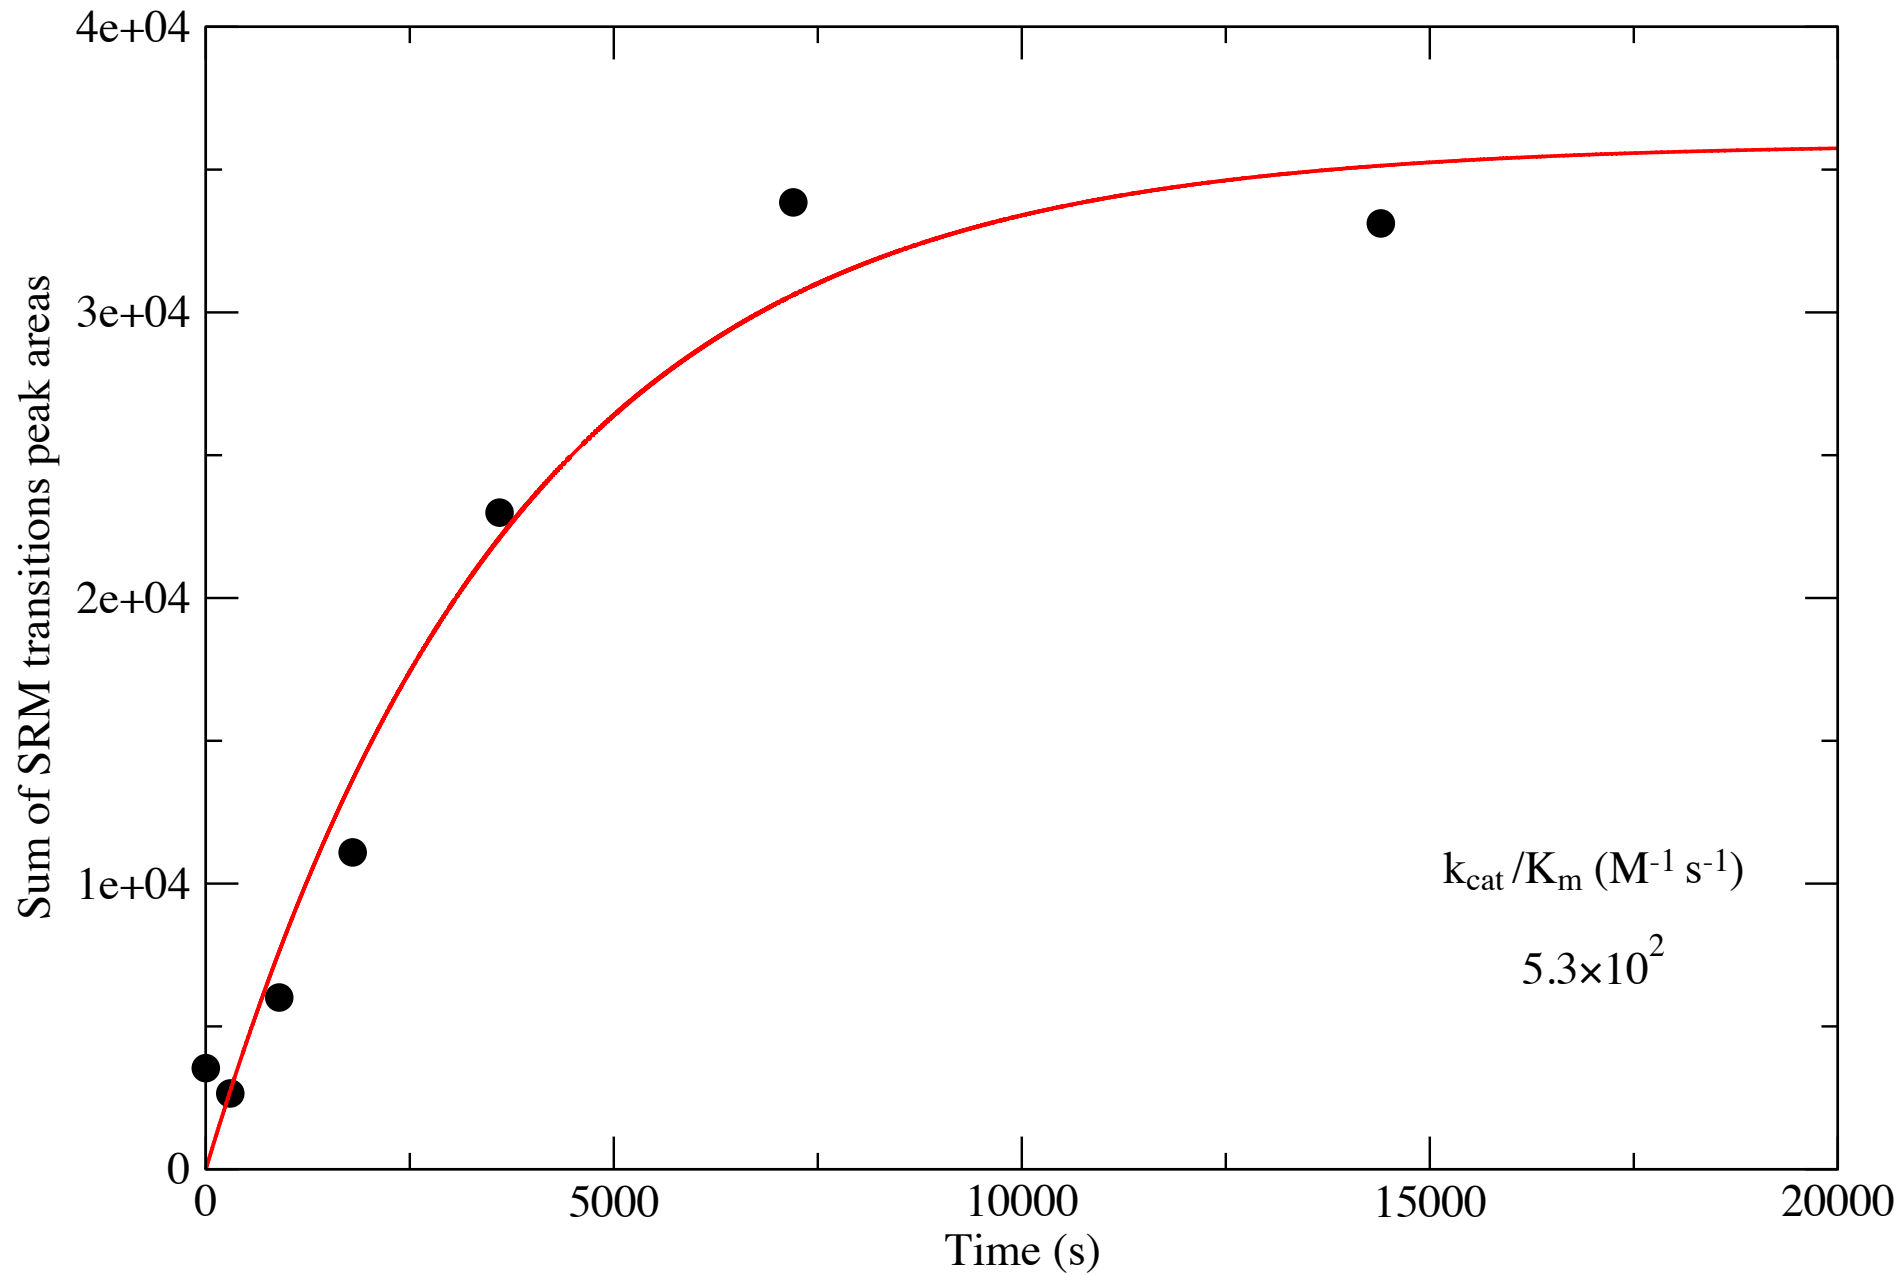

# UBP10\_HUMAN (GVSGGLGQRER)

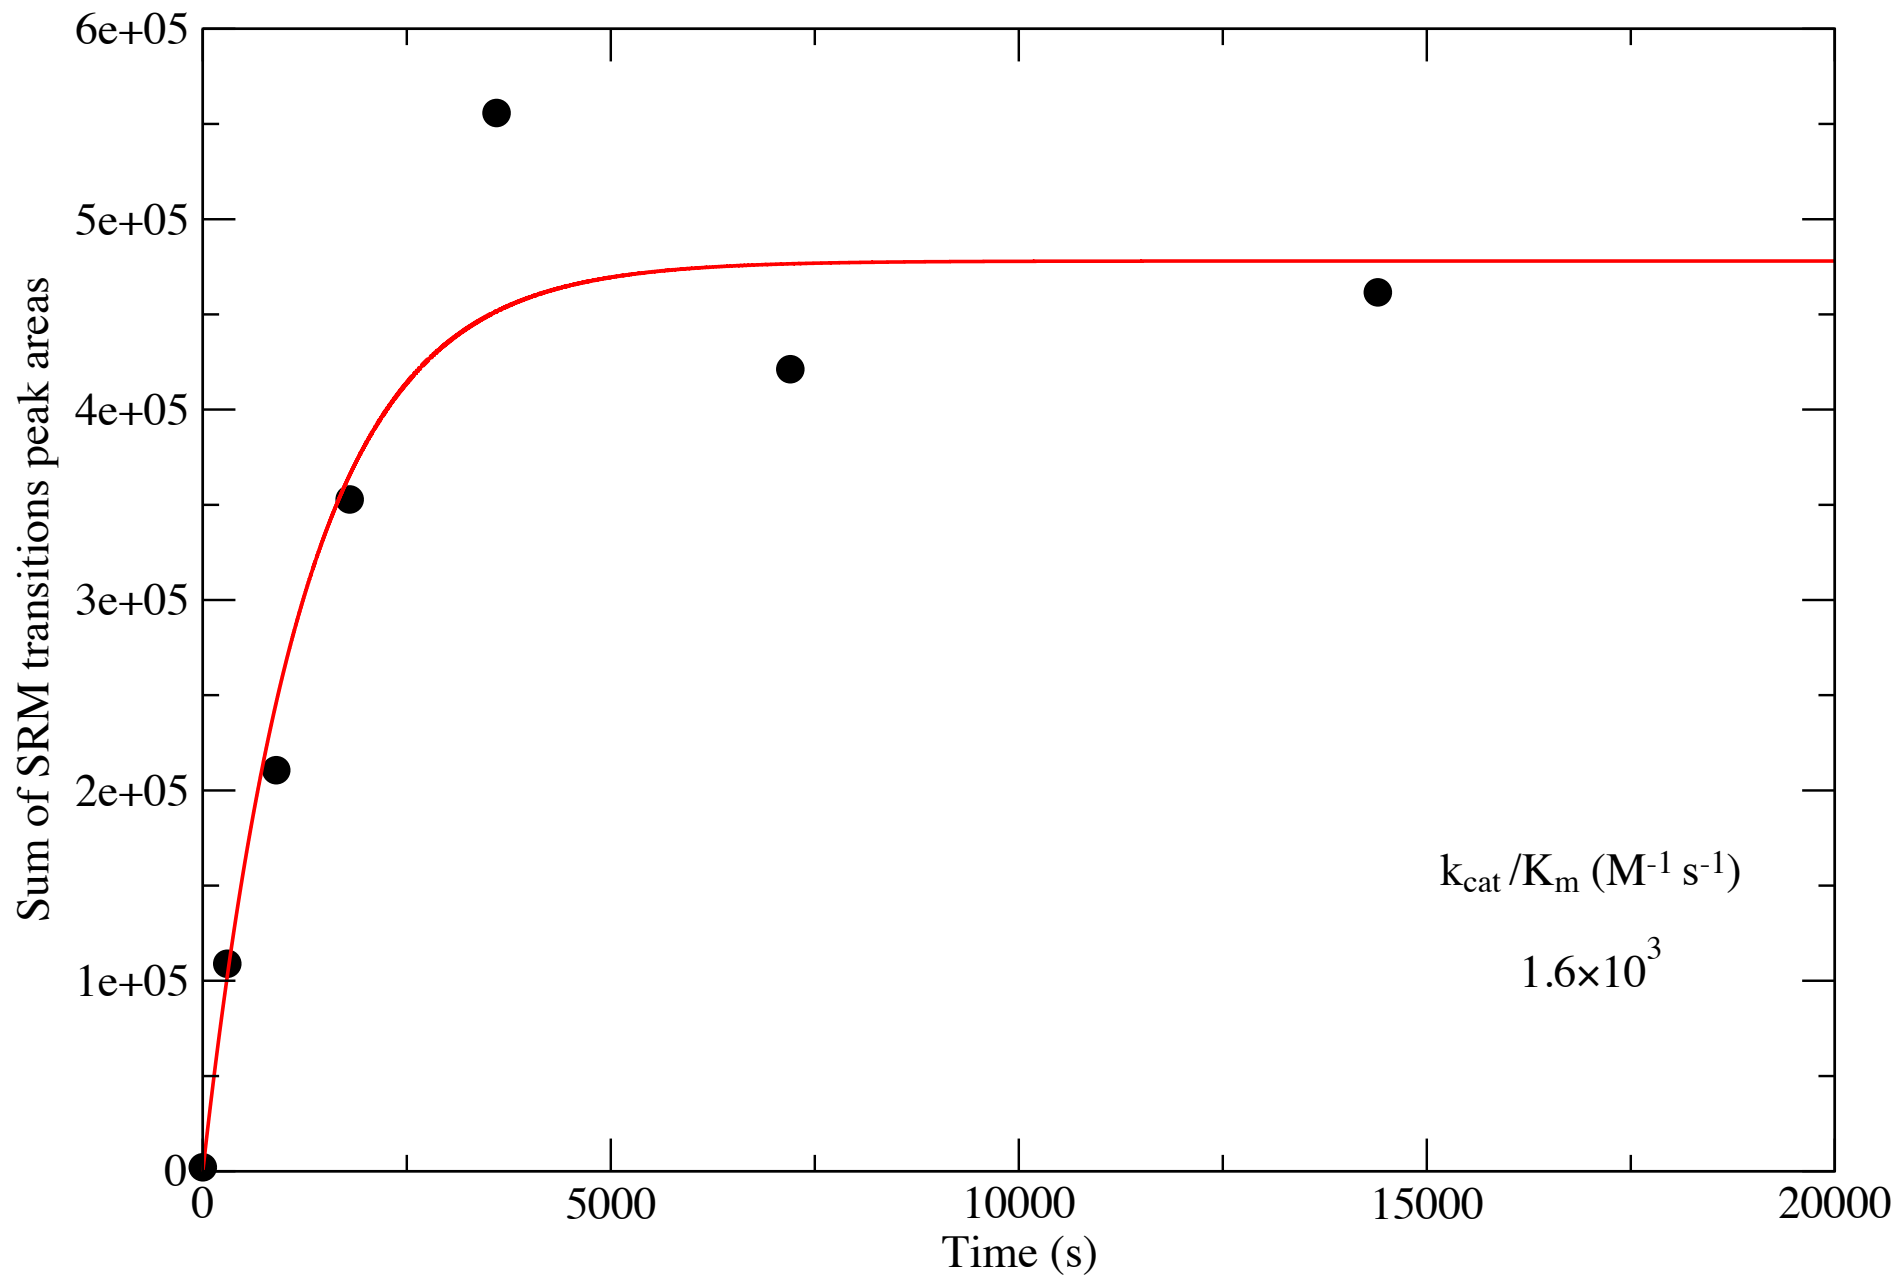

# UBP2L\_HUMAN (SSNLDPSQAPSLAQPLVFSNSK)

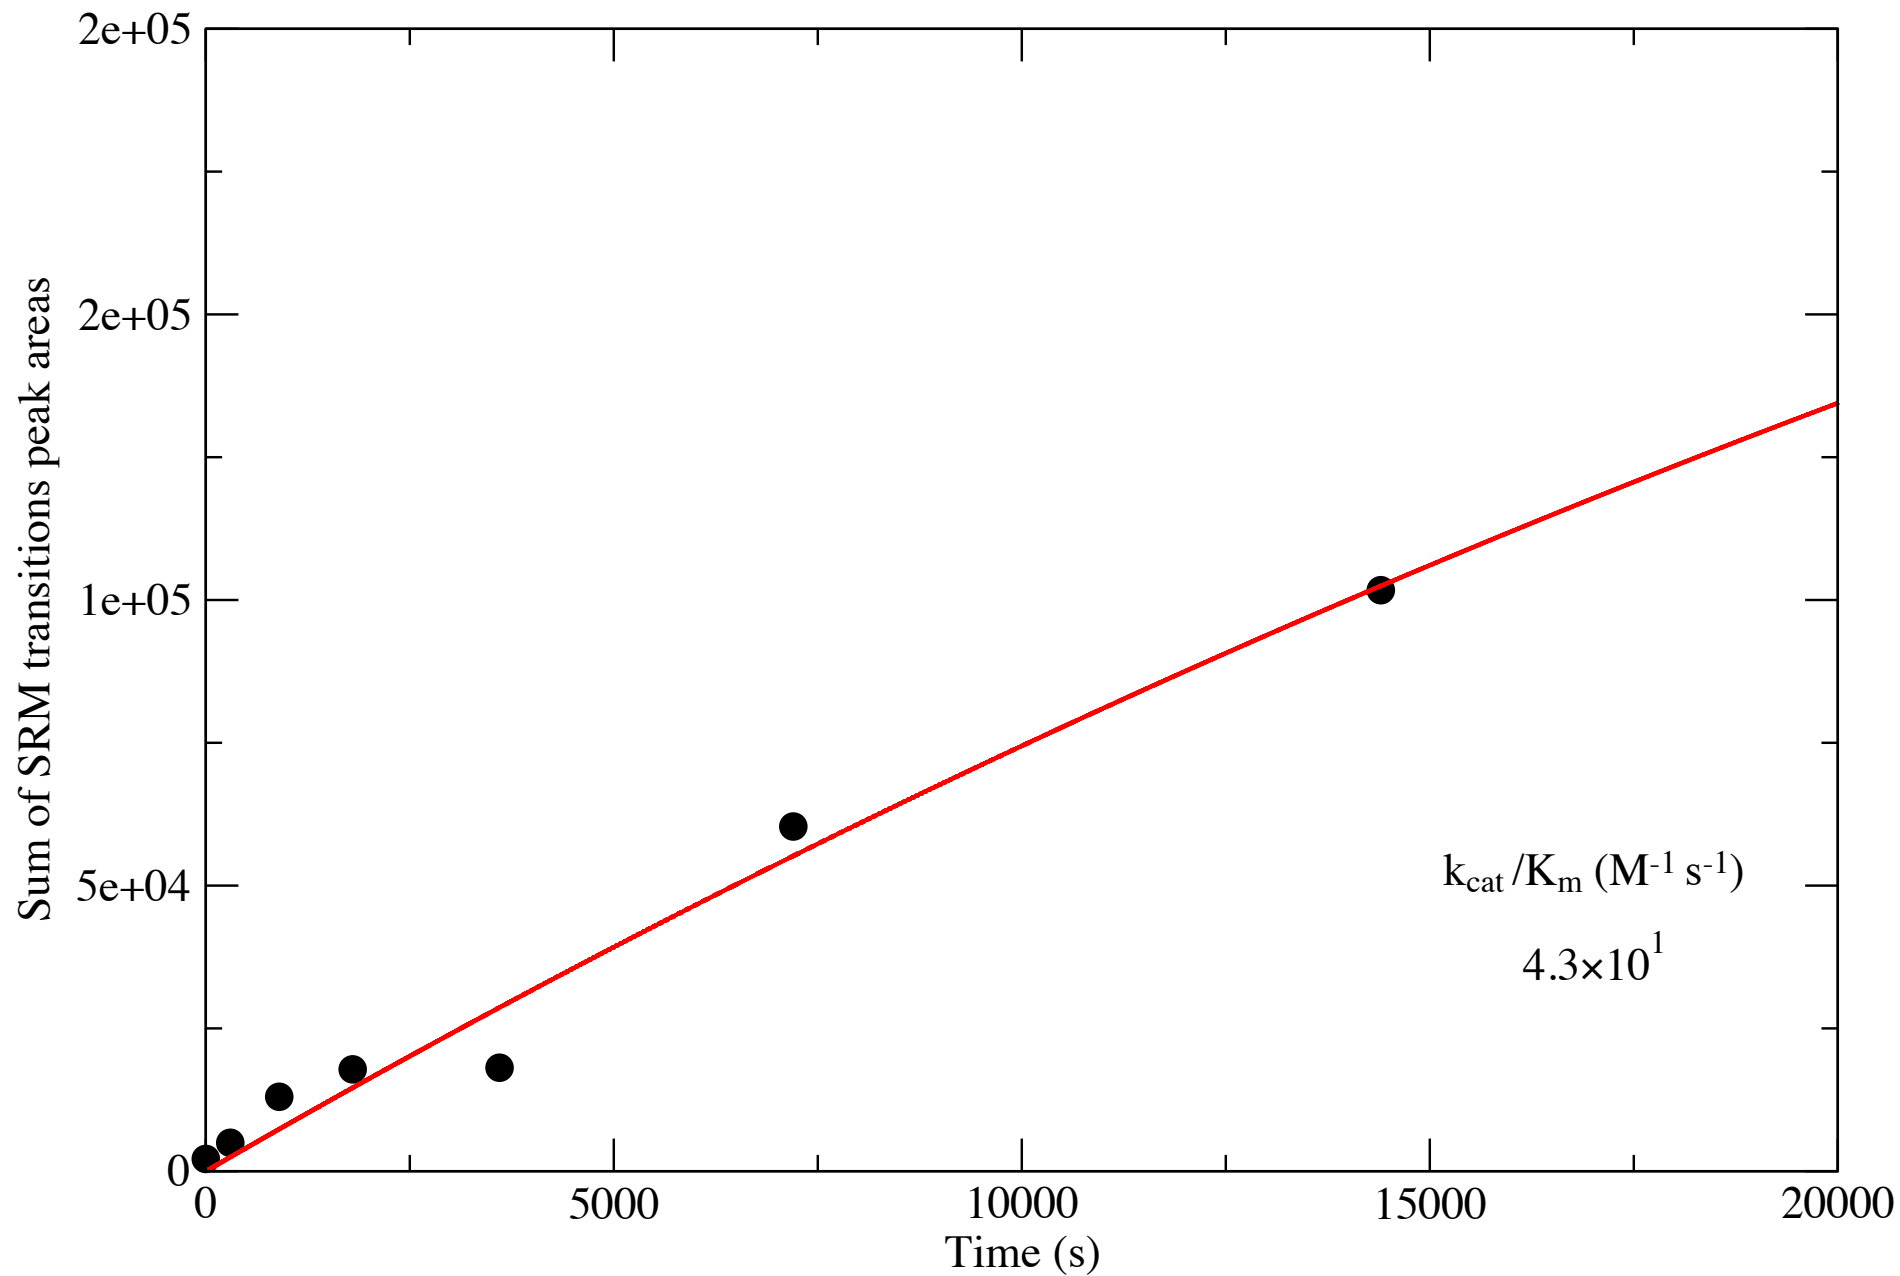

# URP2\_HUMAN (VALSNLEVK)

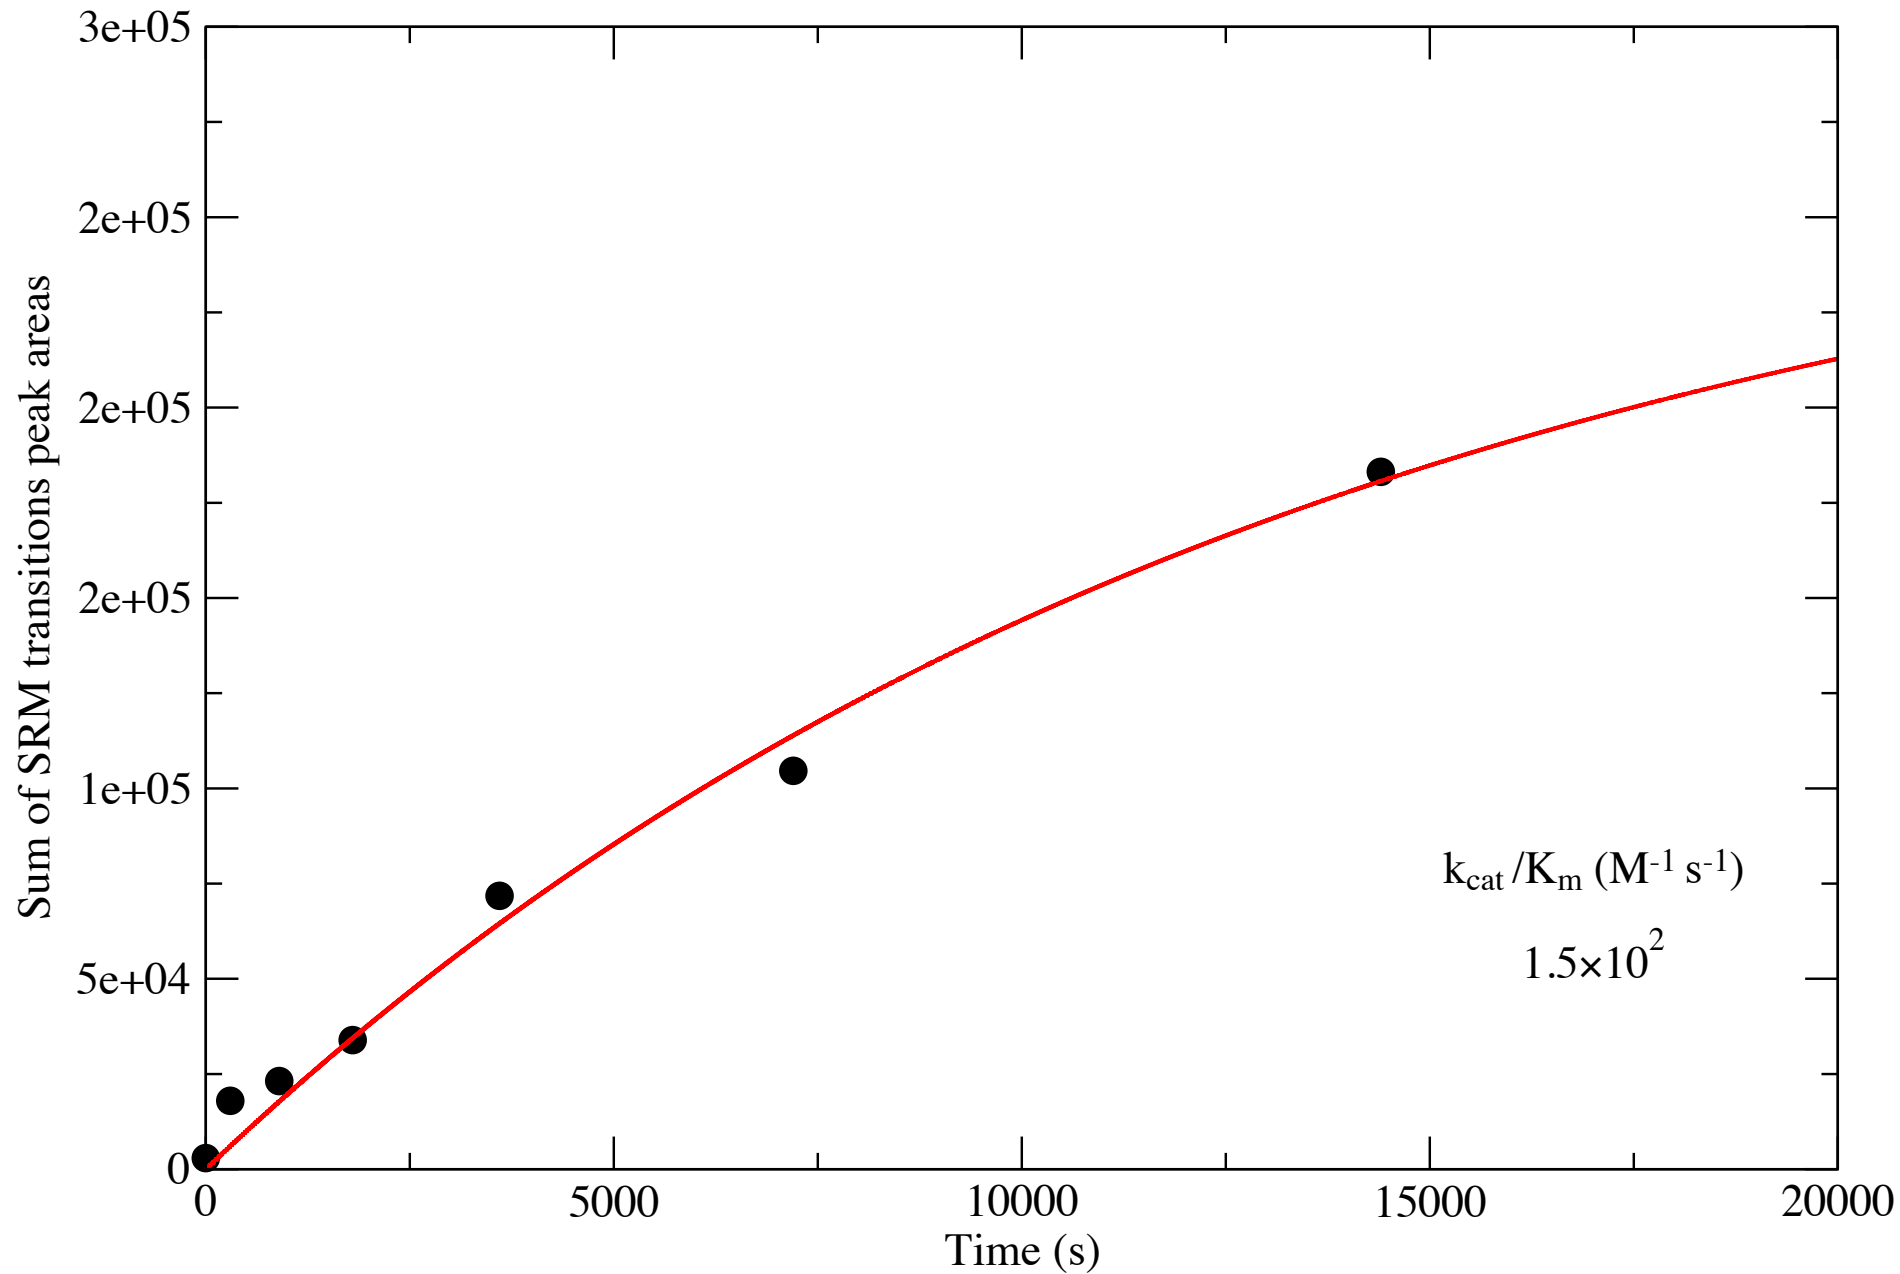

# VCIP1\_HUMAN (AAGHFPIGPDVEDLVK)

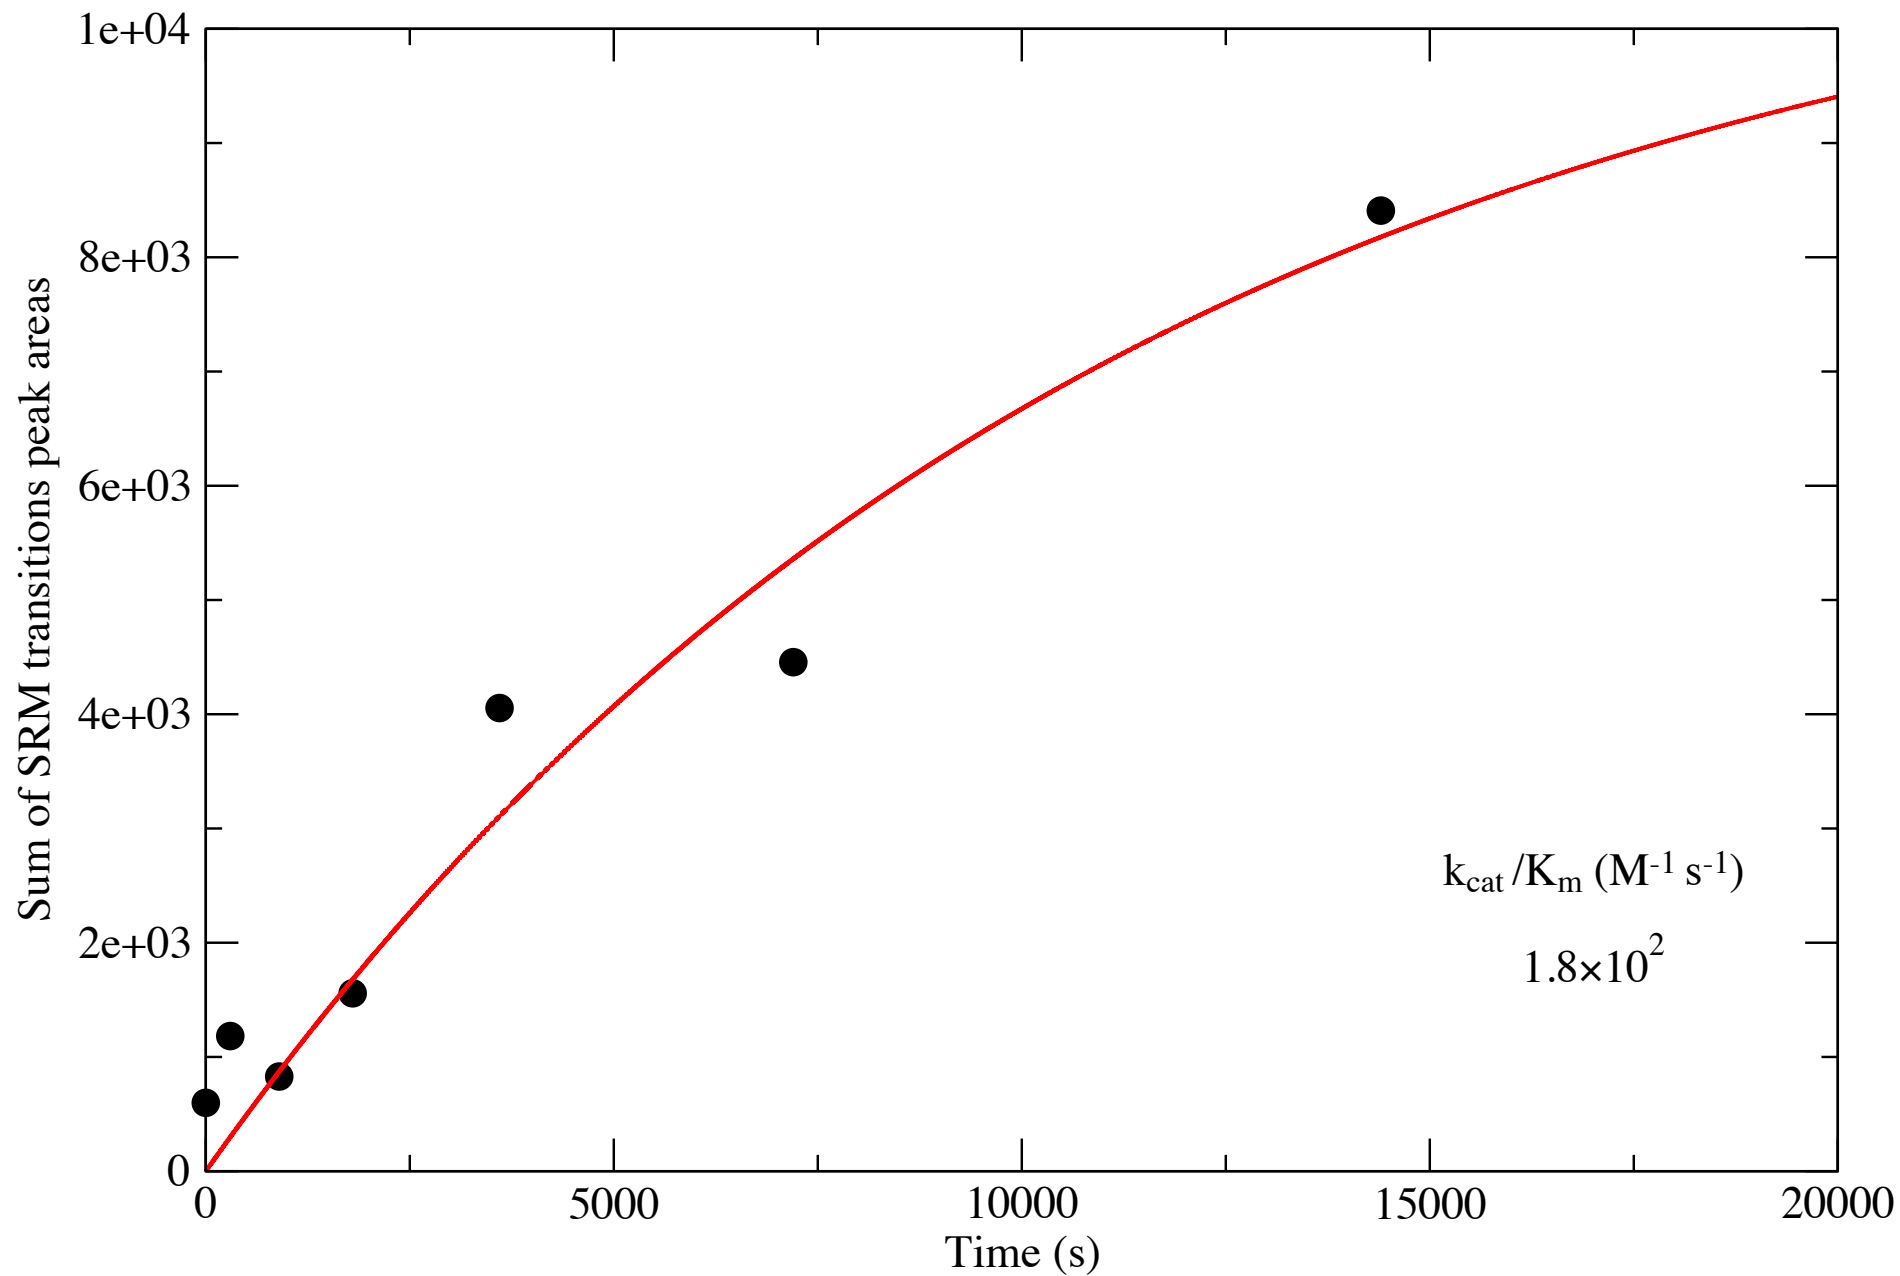

# VCIP1\_HUMAN (GCVADALGAAAFATR)

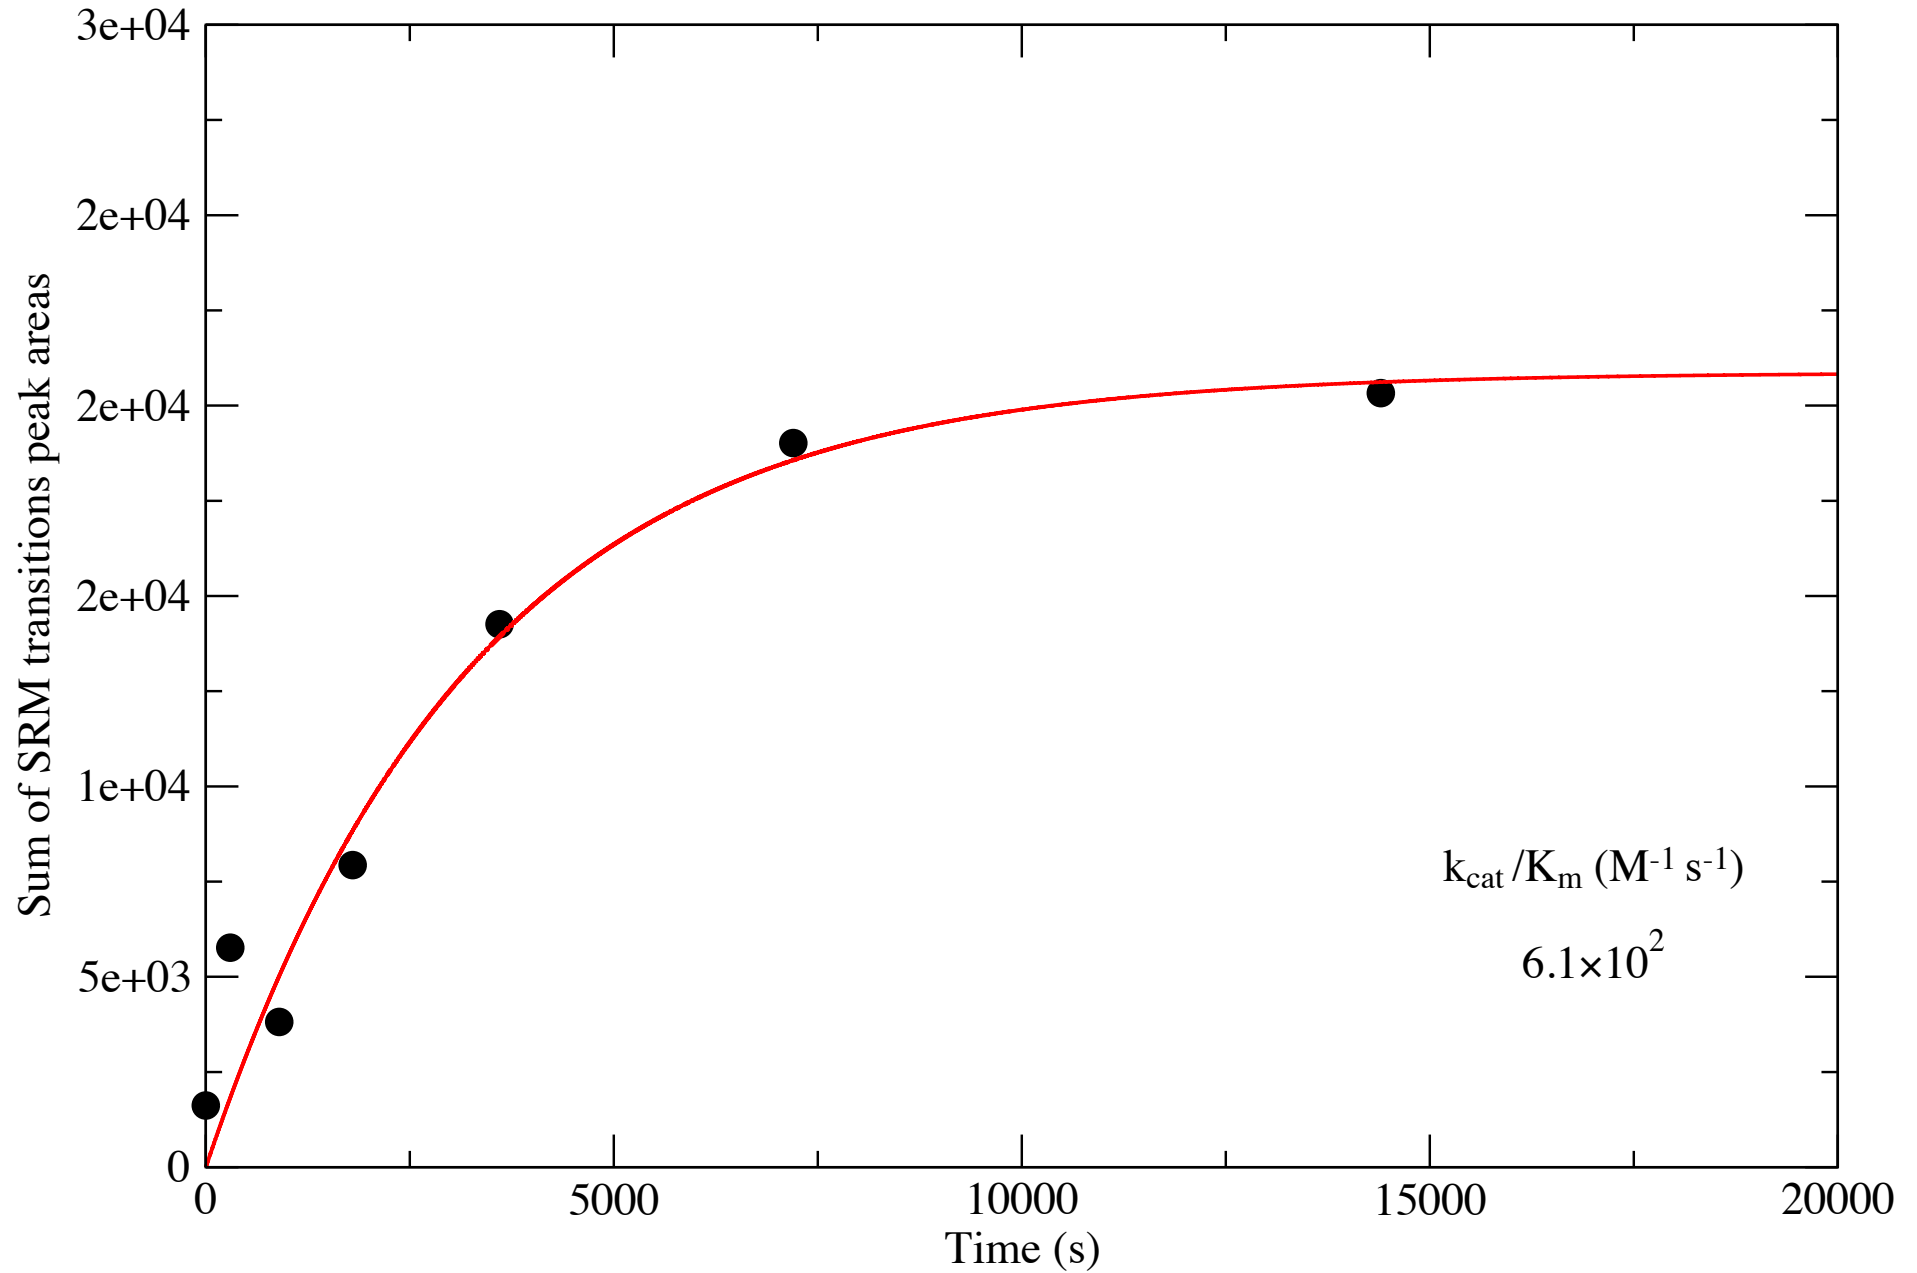



# VIME\_HUMAN (SLPLVDTHSKR)

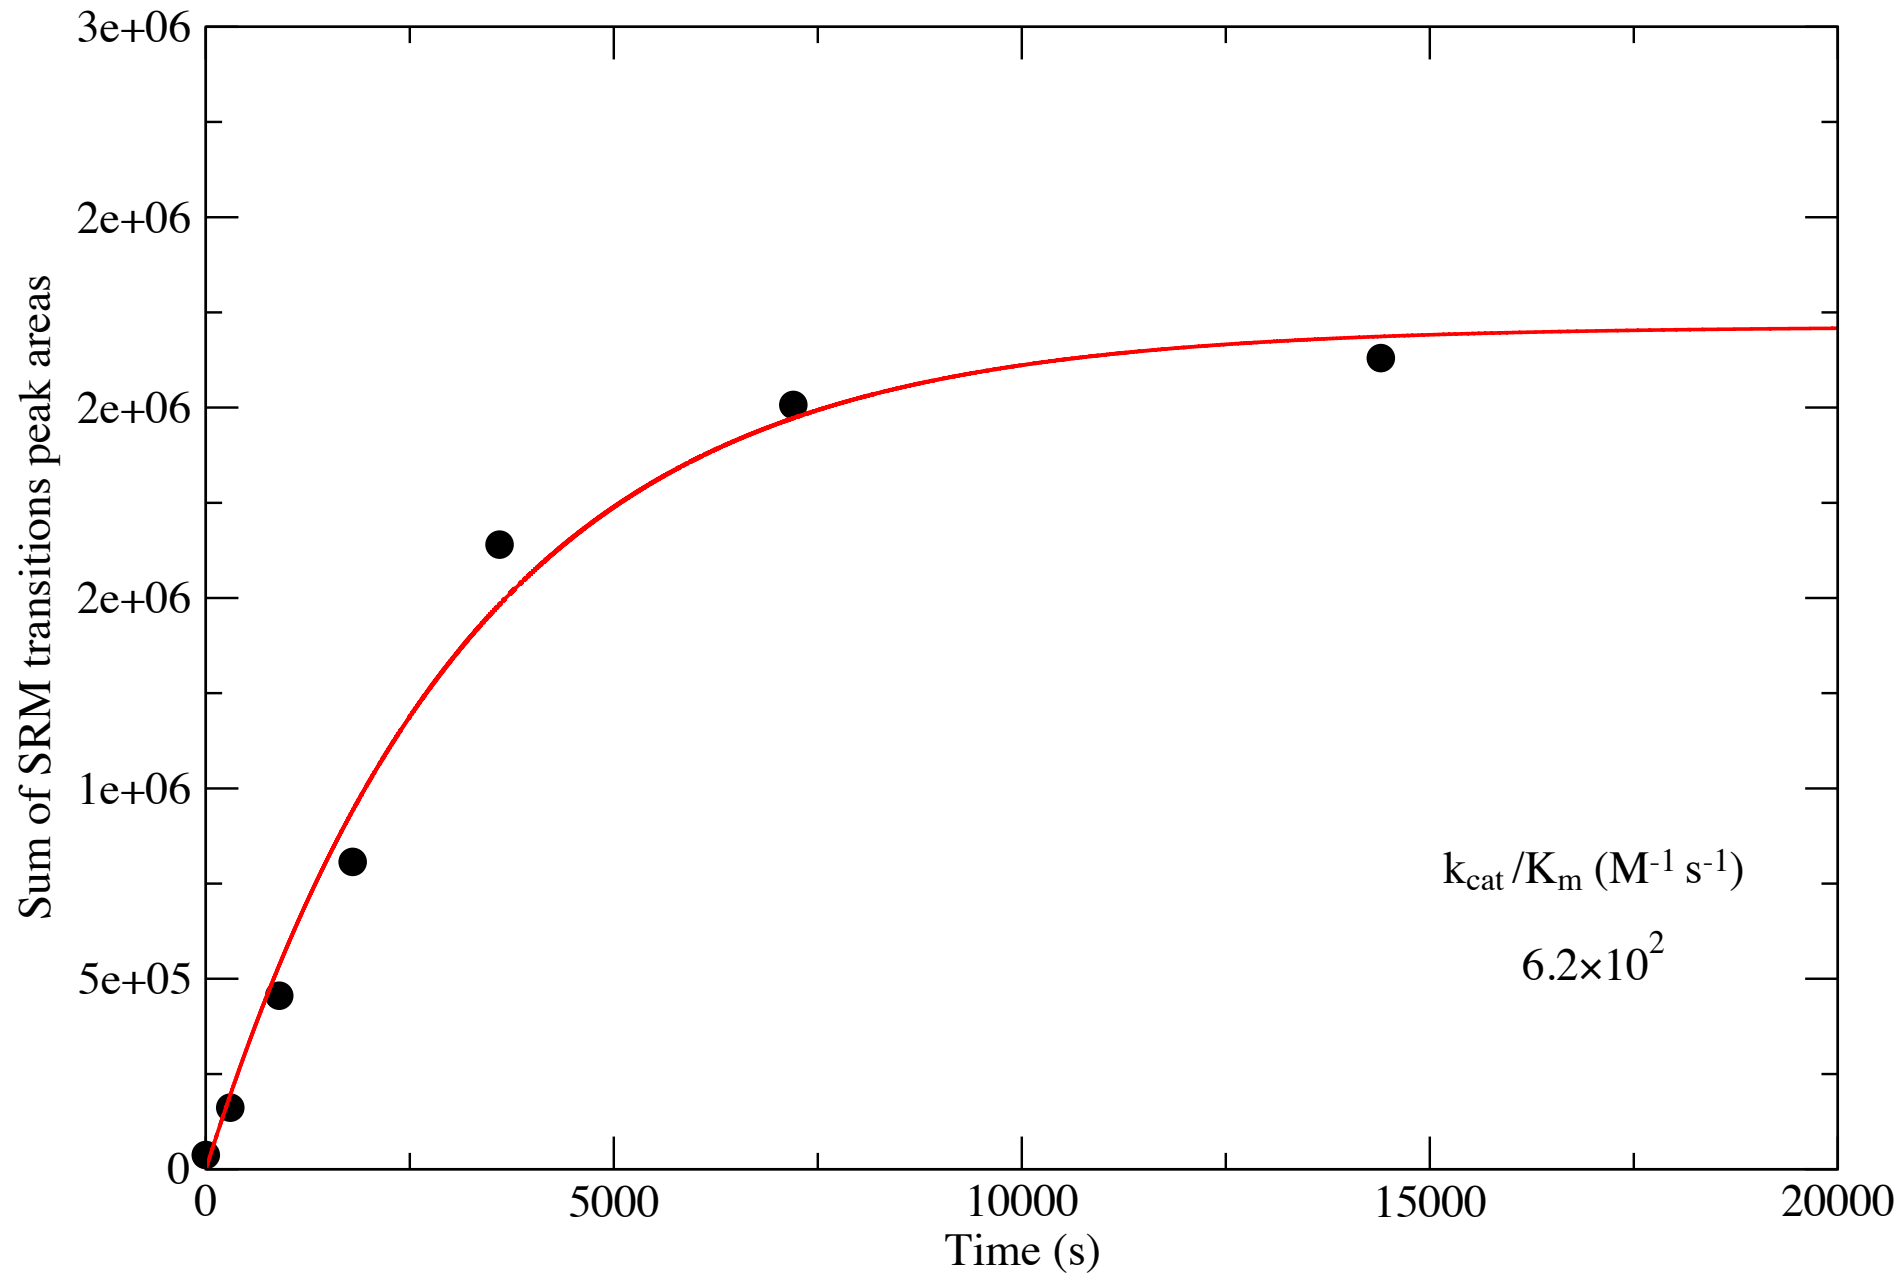

# VIME\_HUMAN (VSKPDLTAALR)

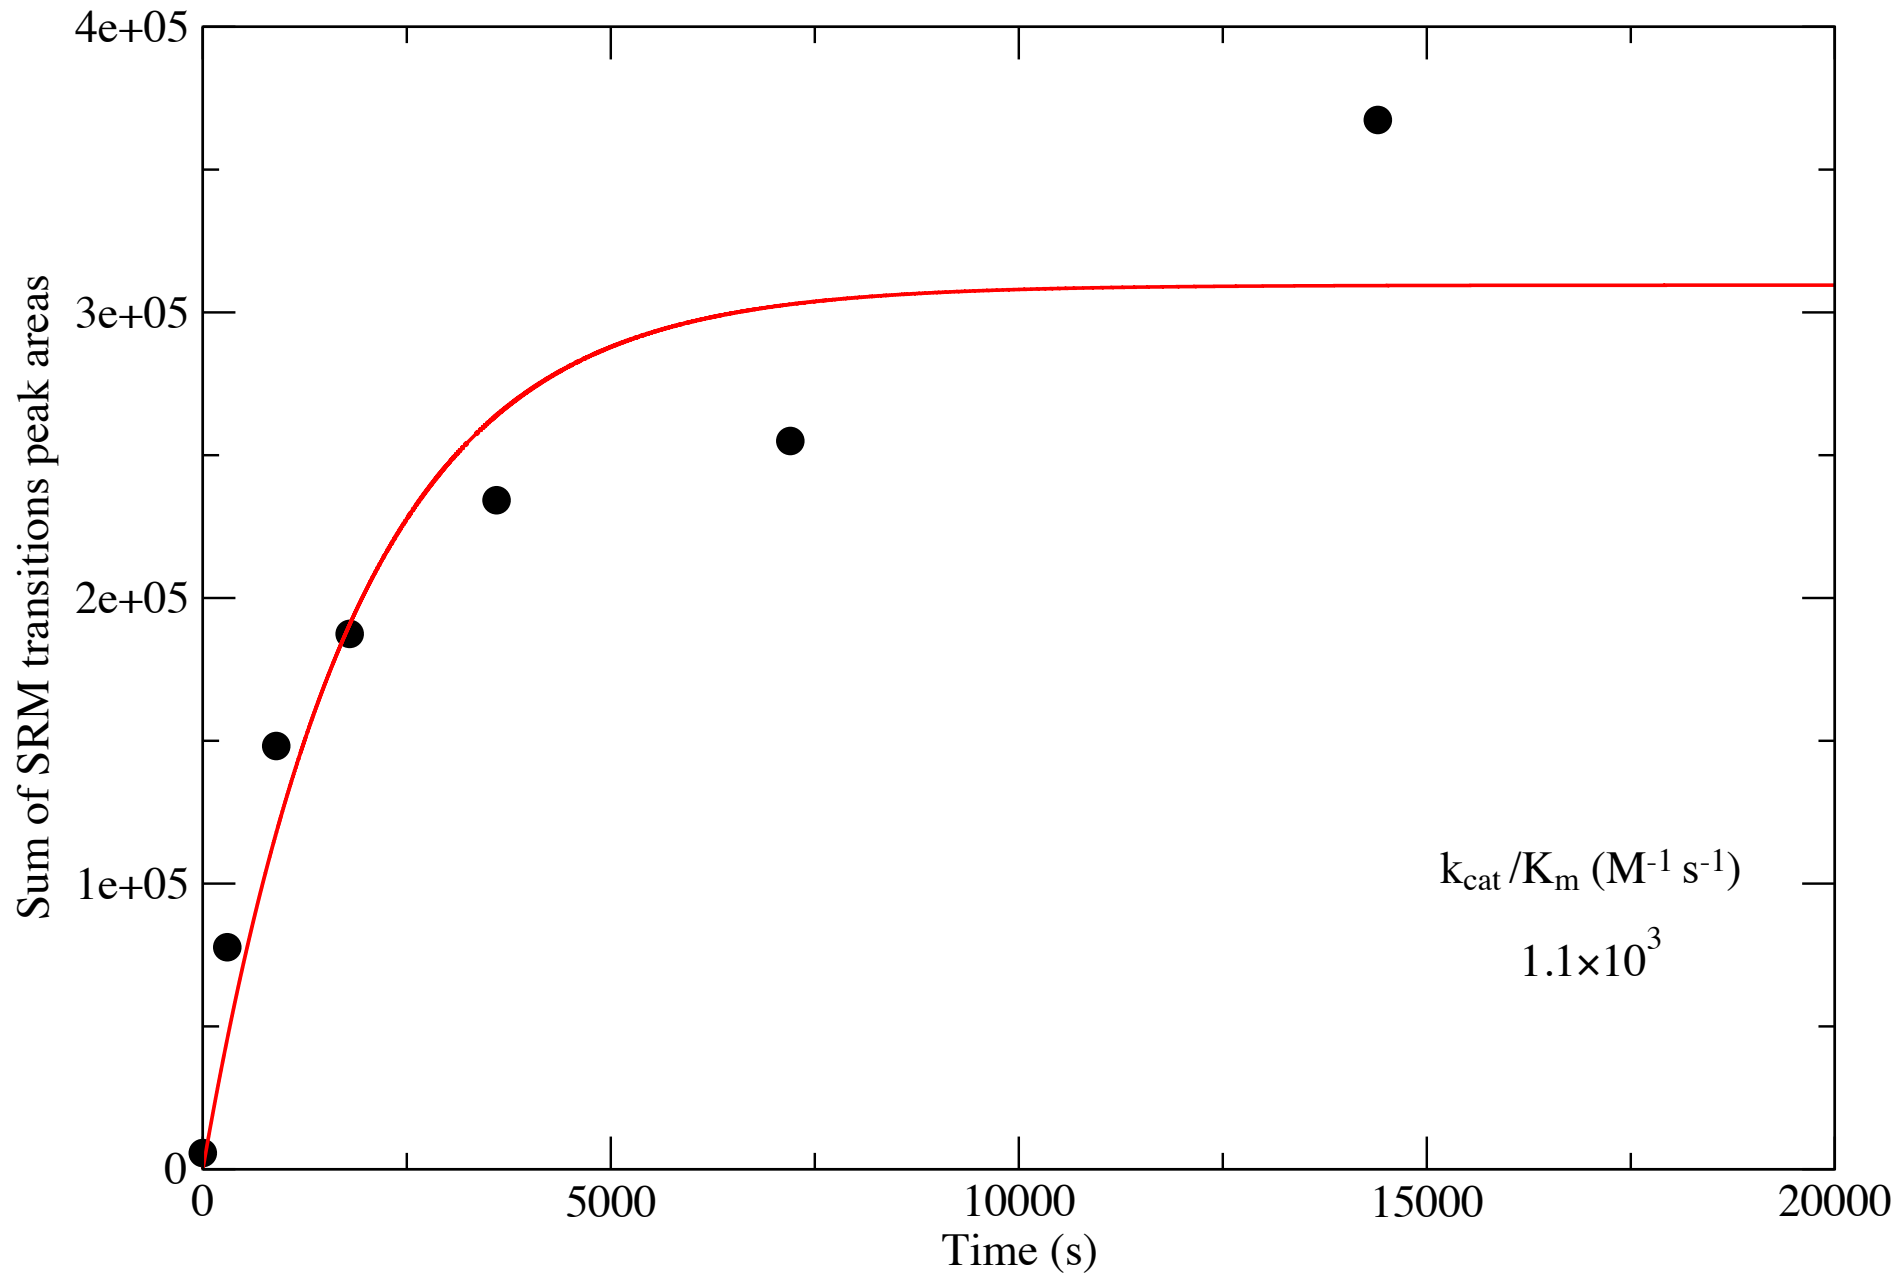

# VP13D\_HUMAN (SVGTYLPGASR)

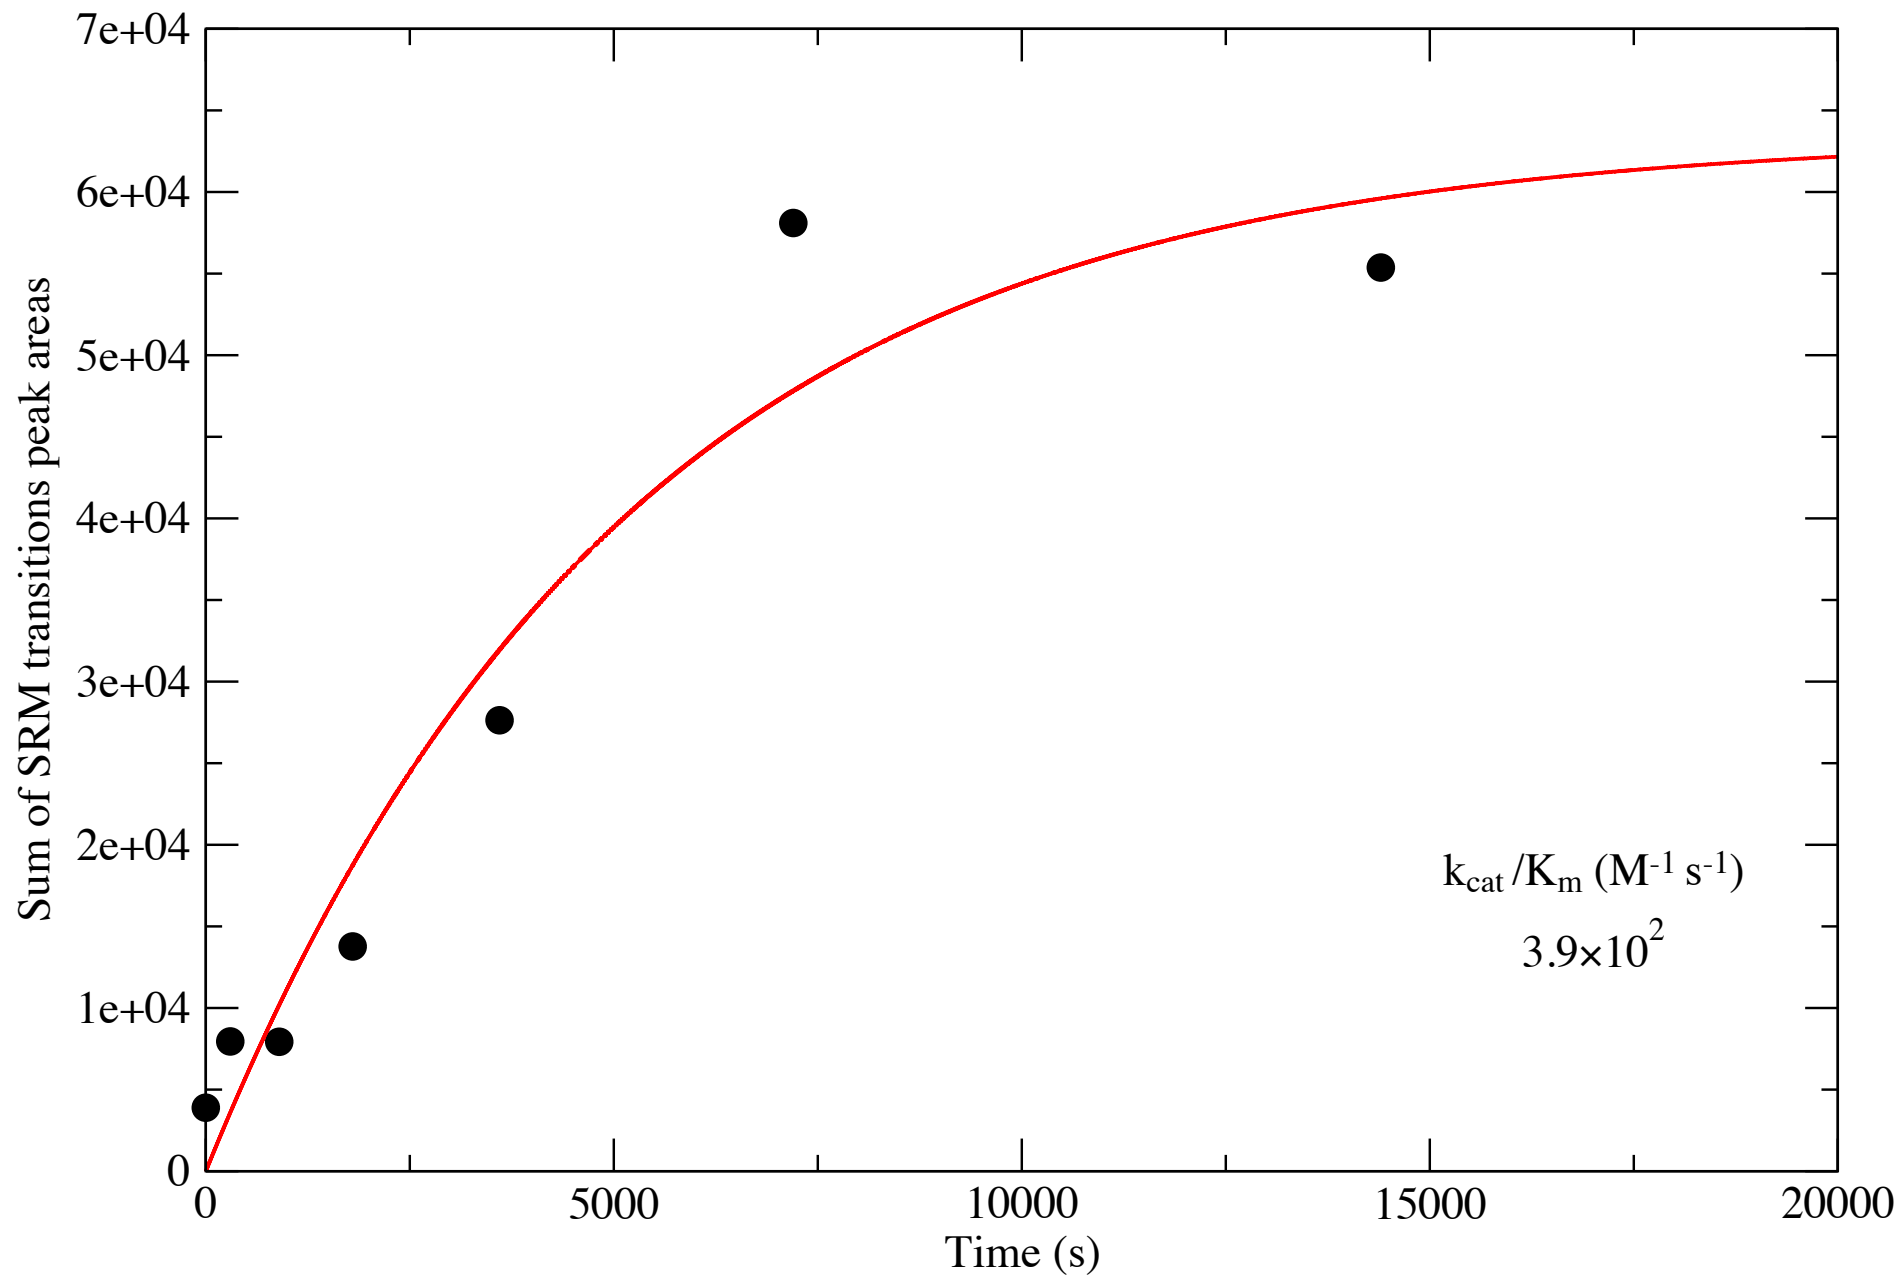

# VPS4A\_HUMAN (SLCGSRNENESEAAR)

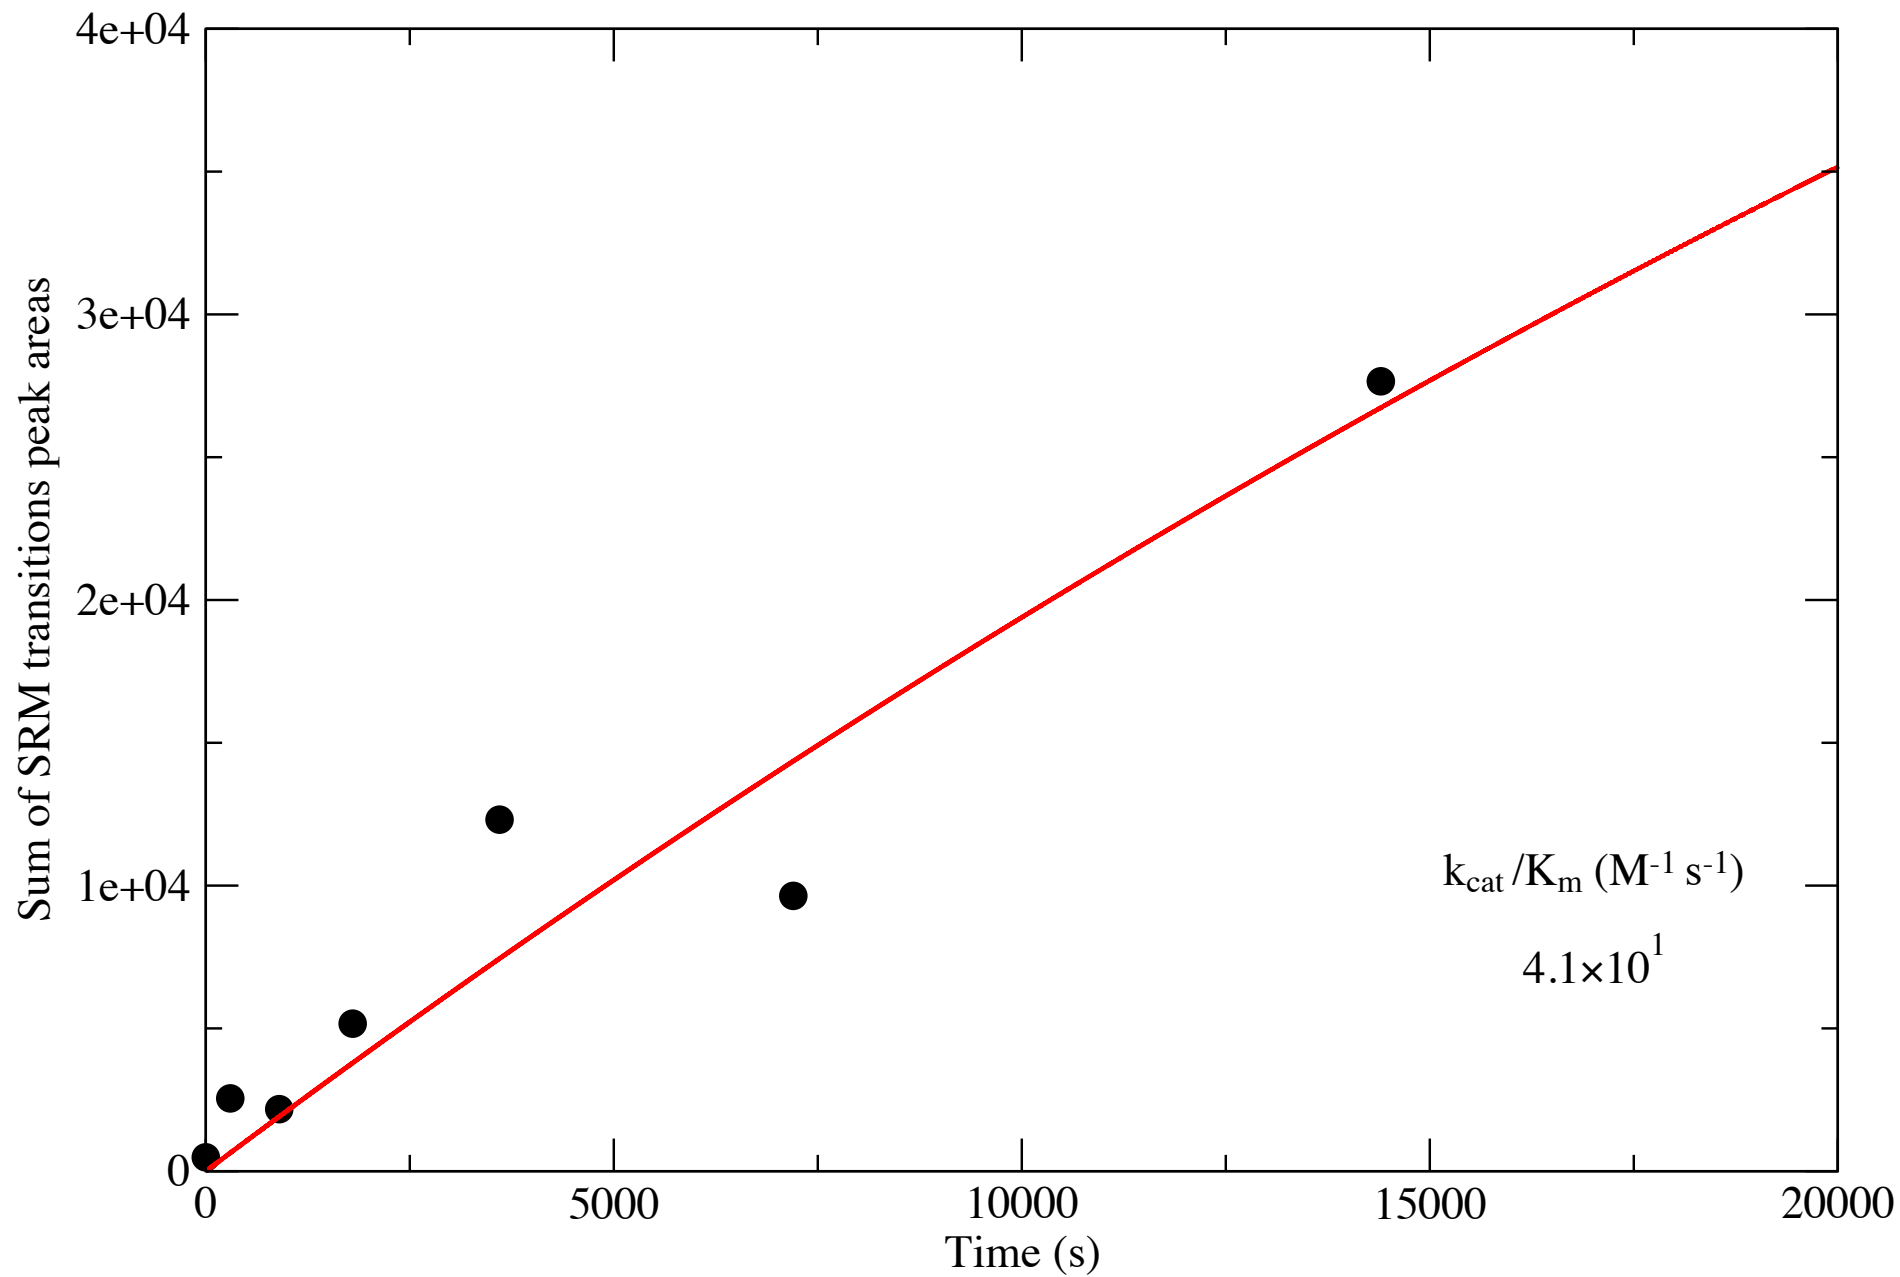

# YJ005\_HUMAN (GLSEPDVFAIAPFR)

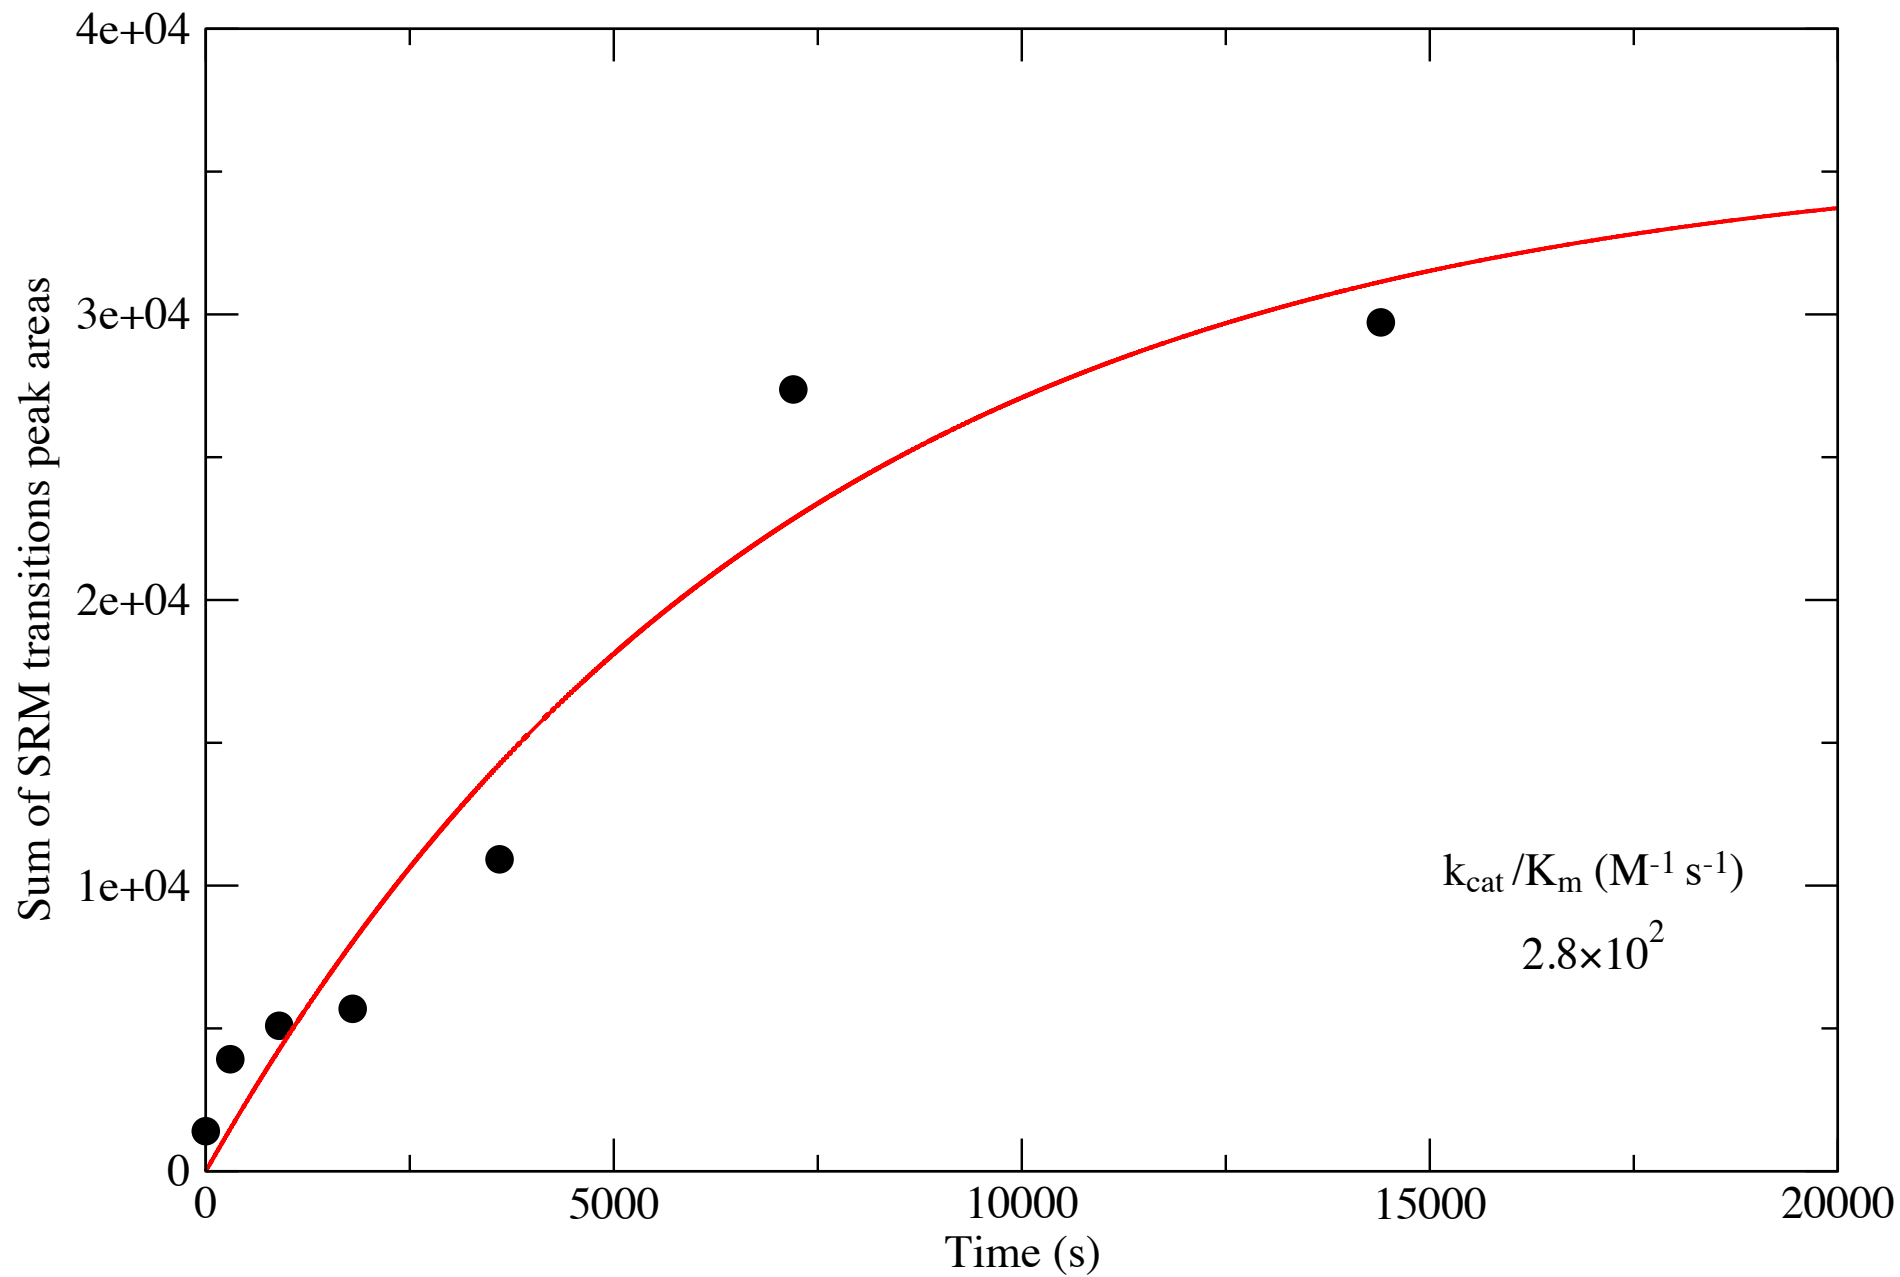

# Z3H7A\_HUMAN (SAPETNETVMPSALVR)

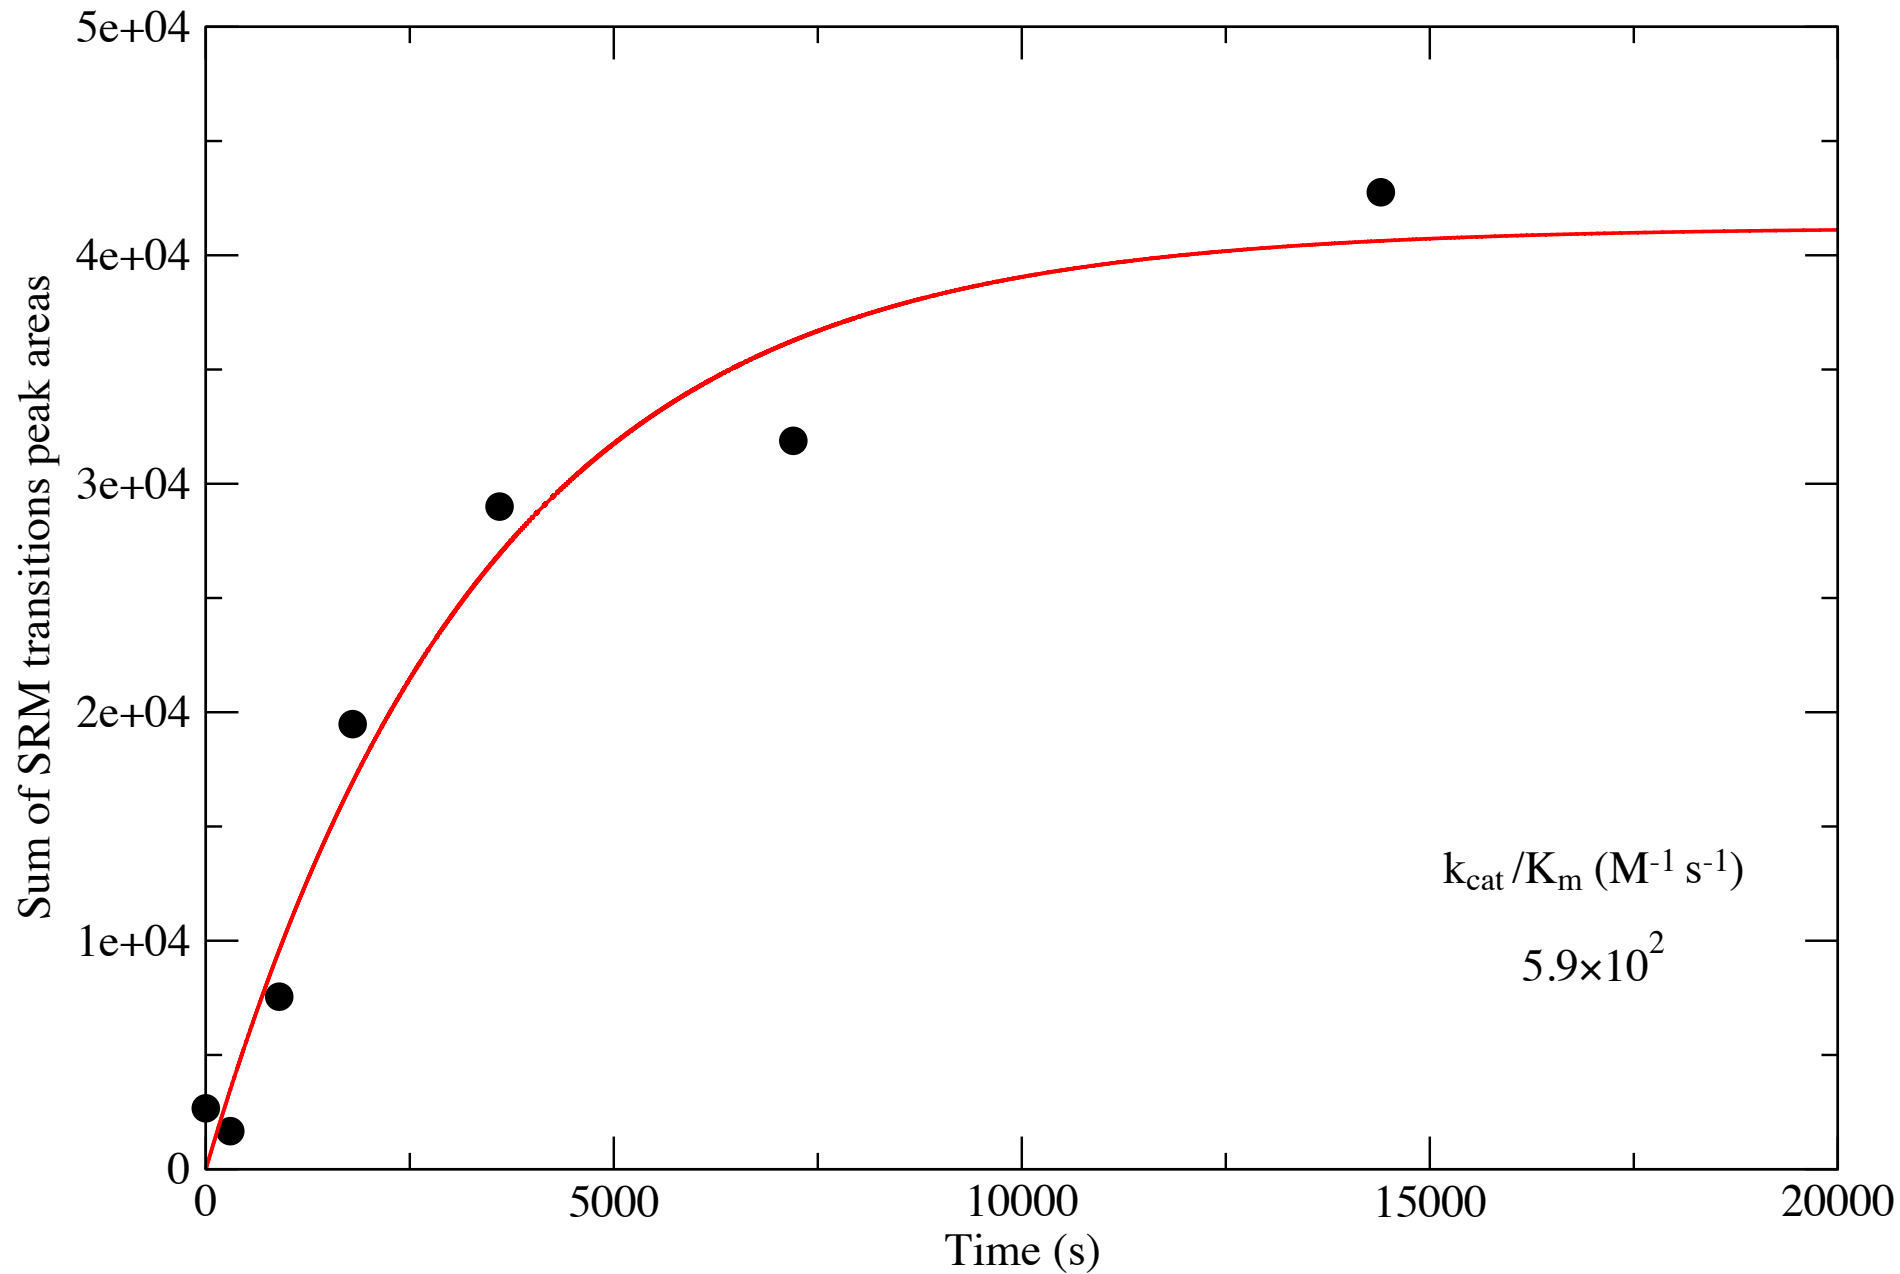

# Z3H7B\_HUMAN (ALDSFGSTR)

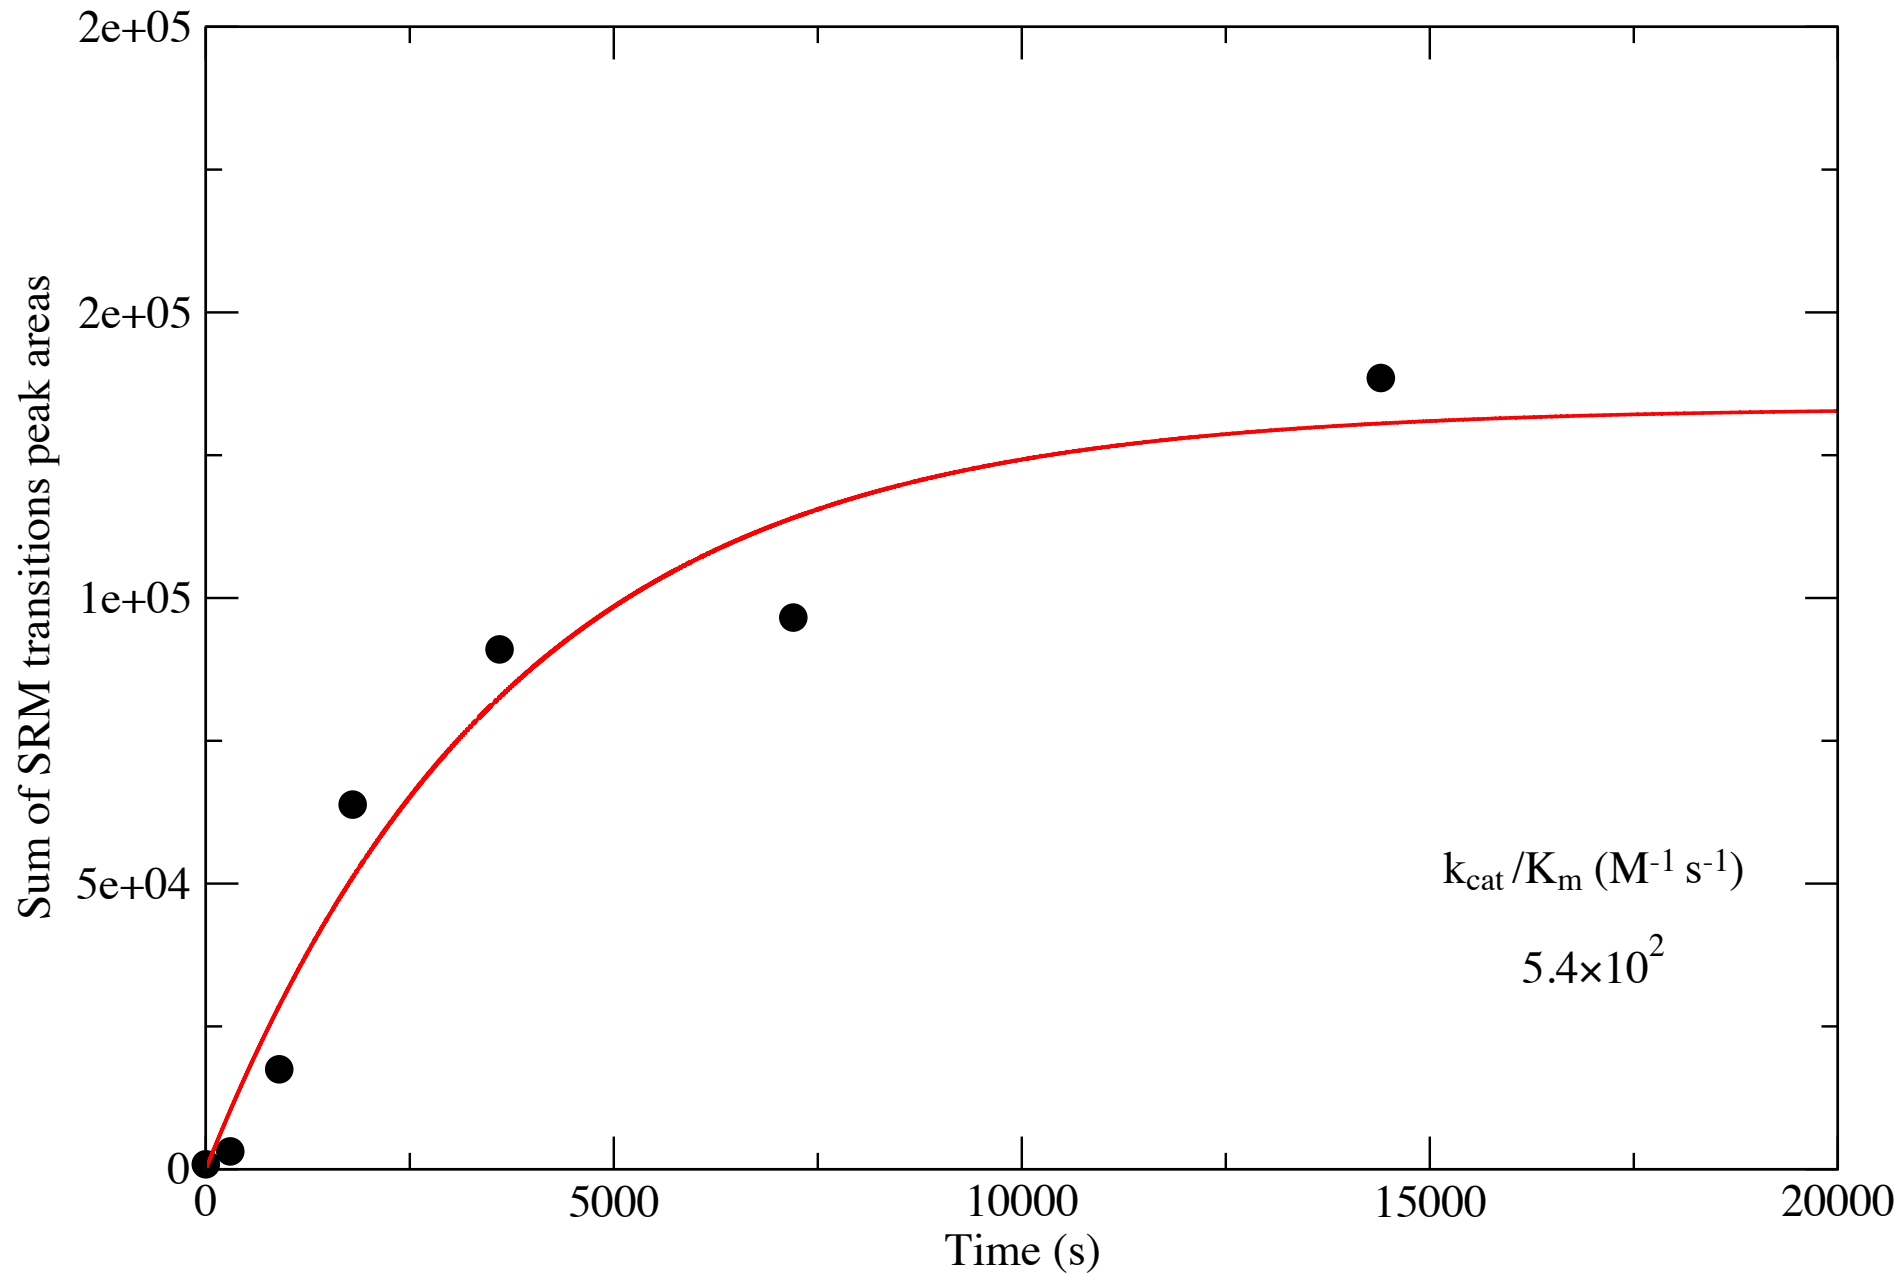

# ZC3H4\_HUMAN (GAEETQDTSGGPER)

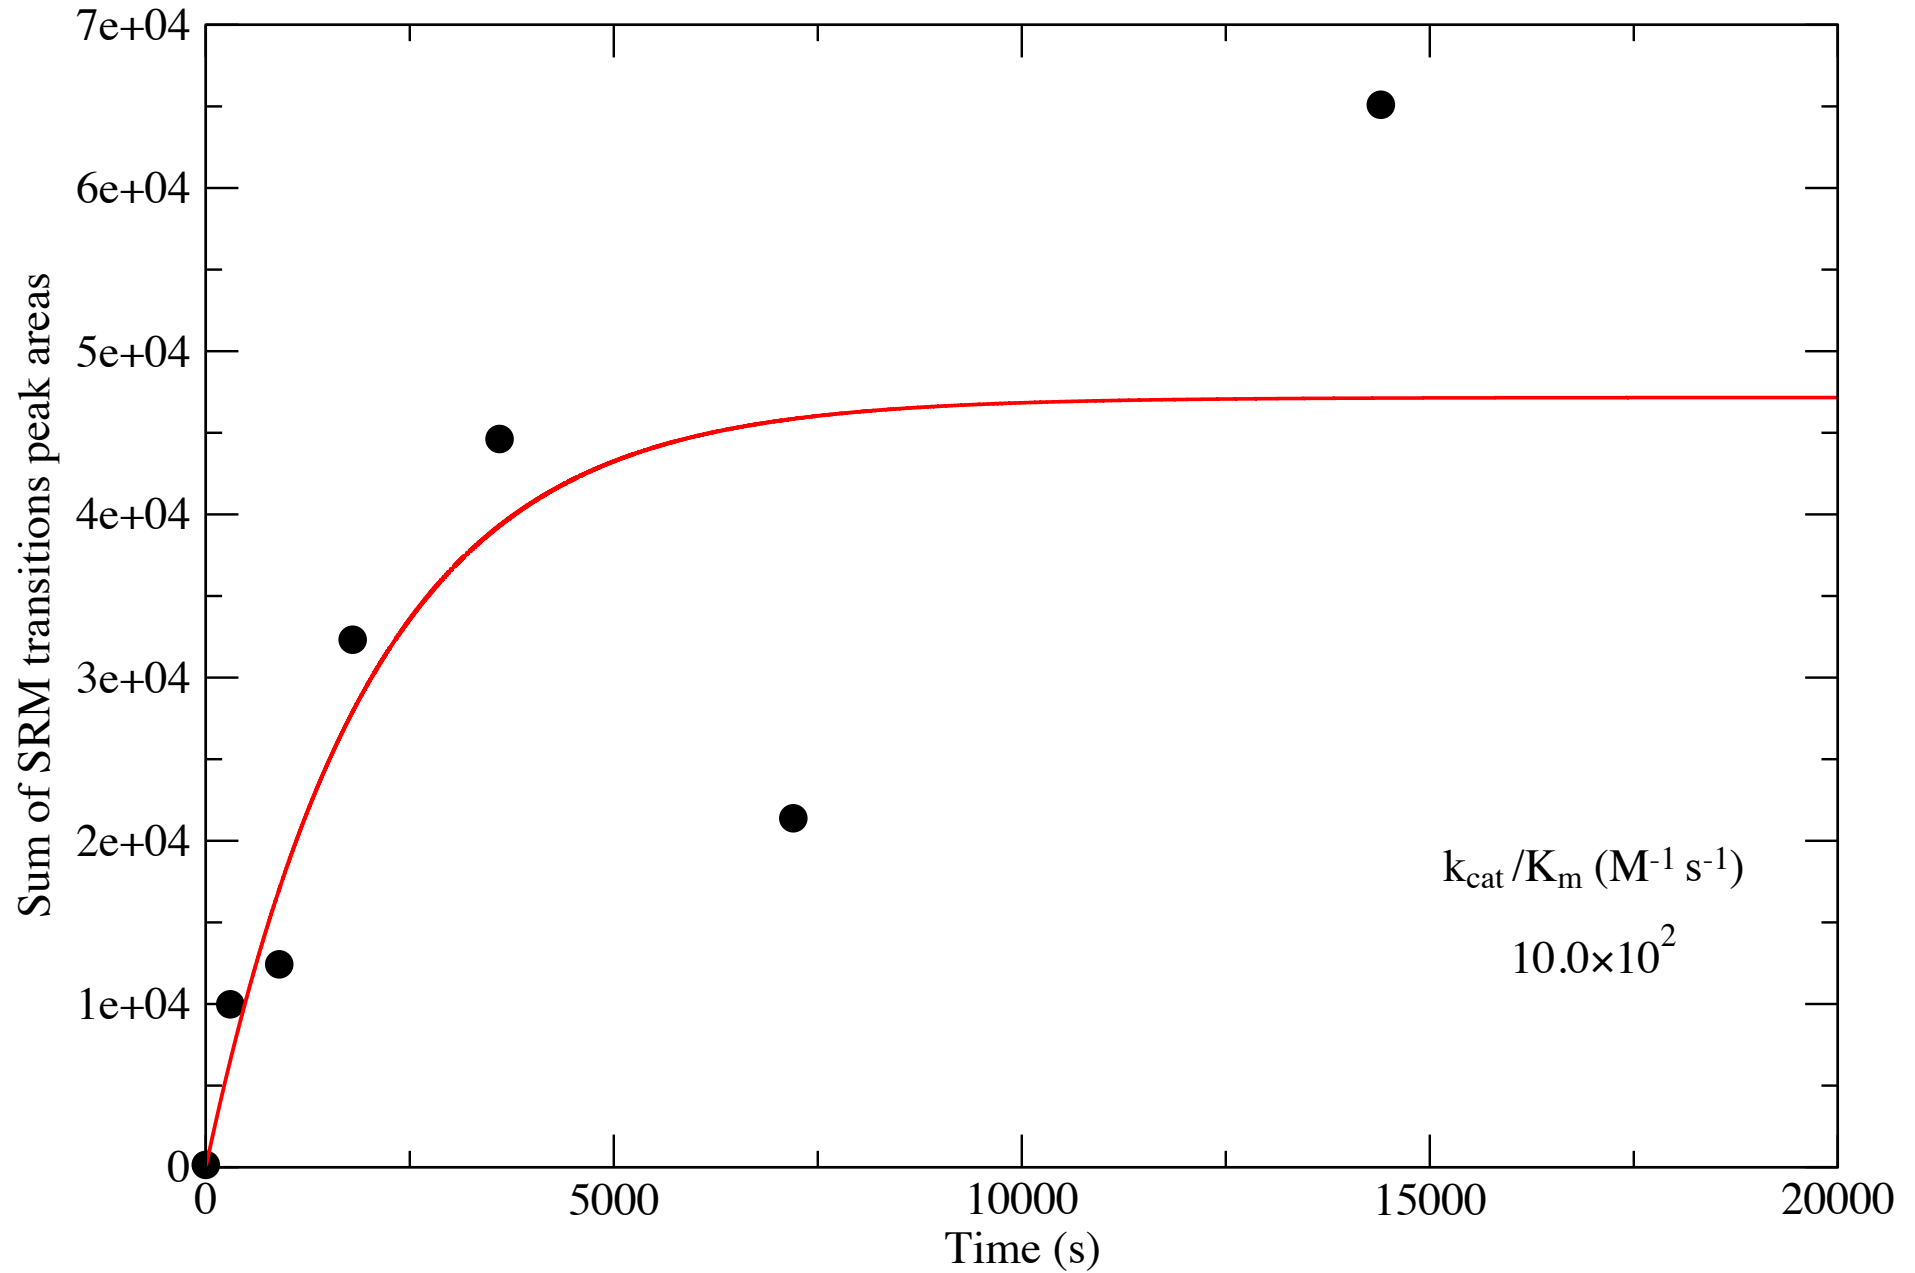



# ZCCHV\_HUMAN (GVATDITSTR)

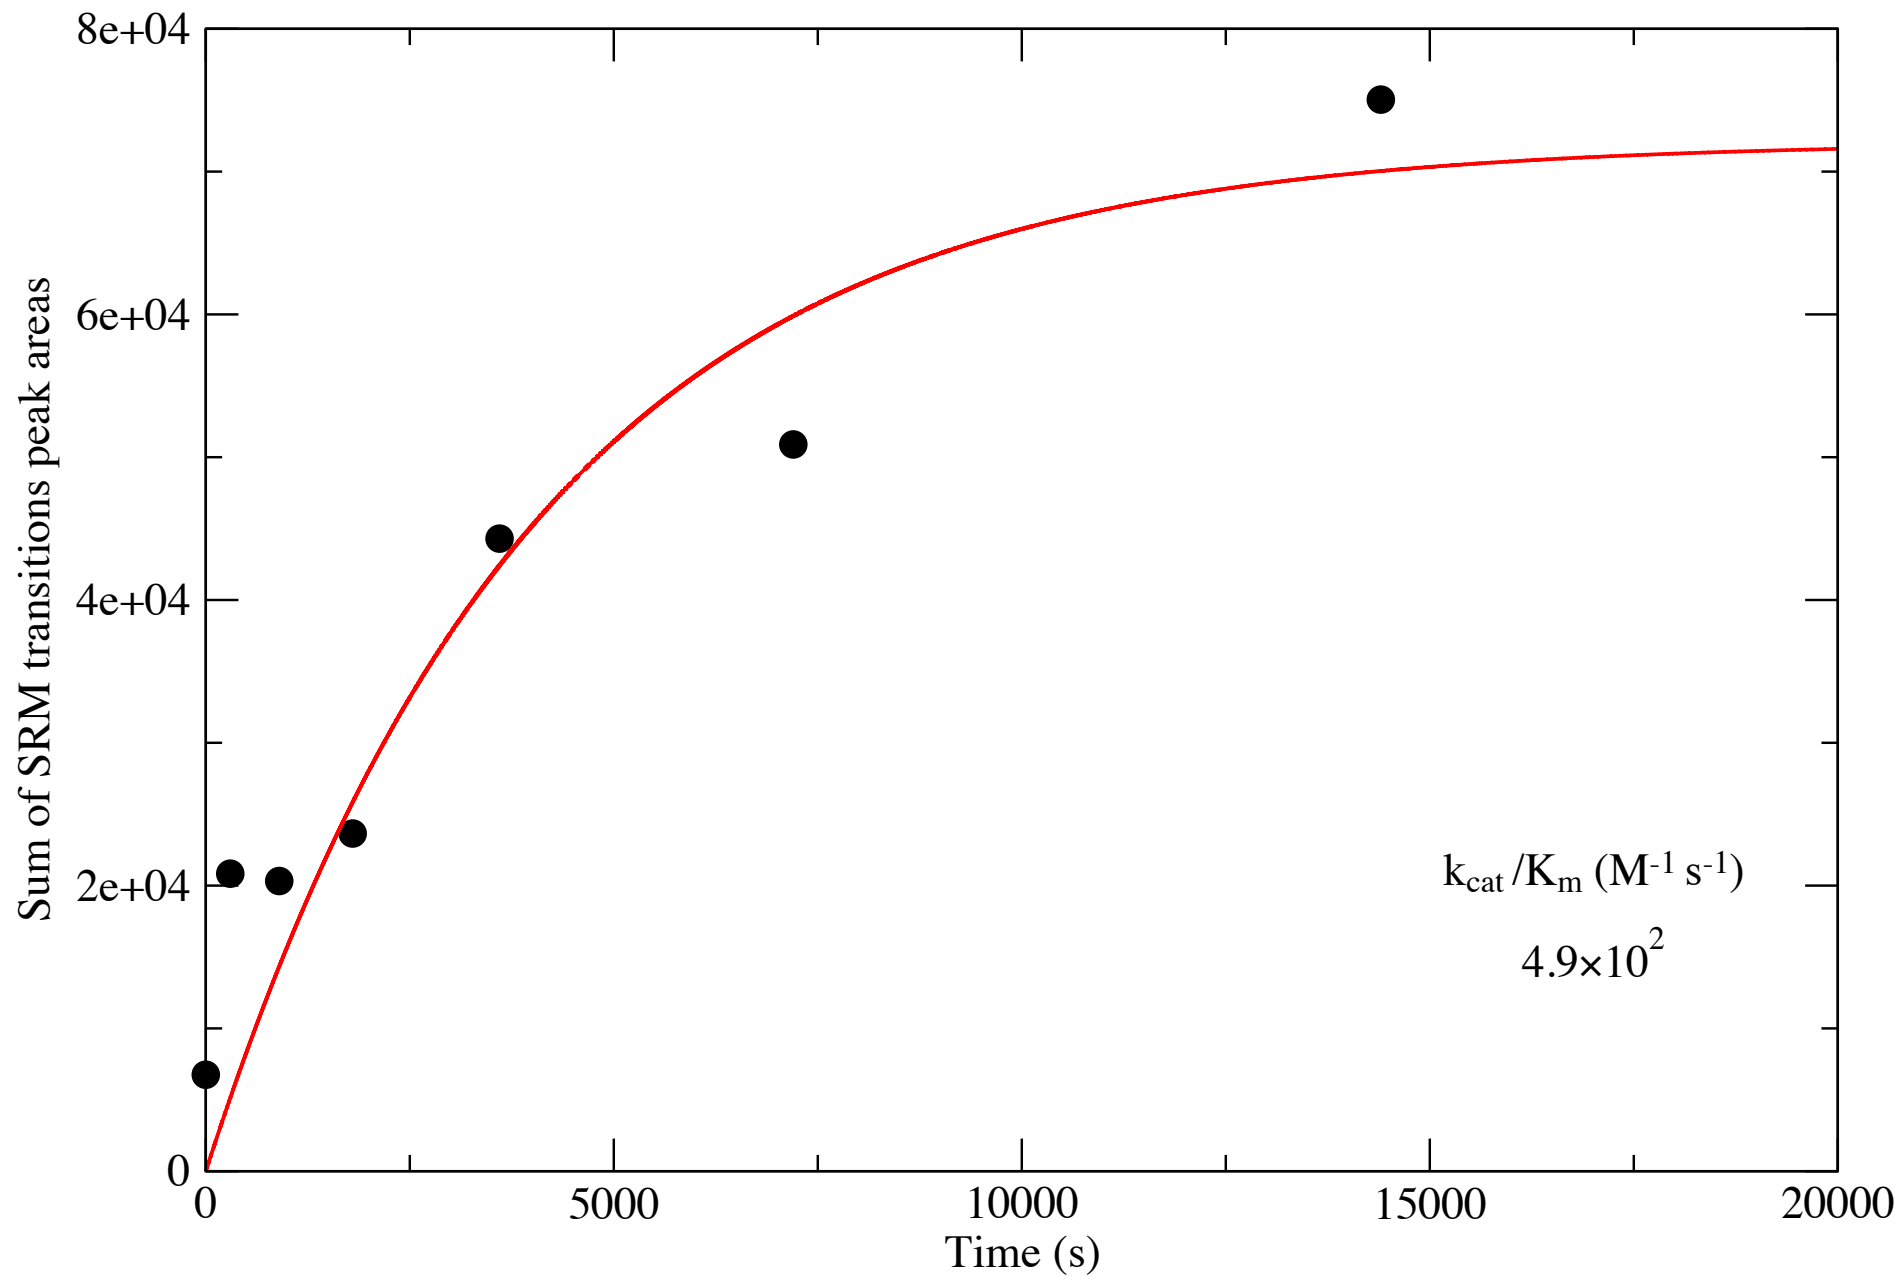

# ZFP91\_HUMAN (SALPQEVSIAASRPSR)

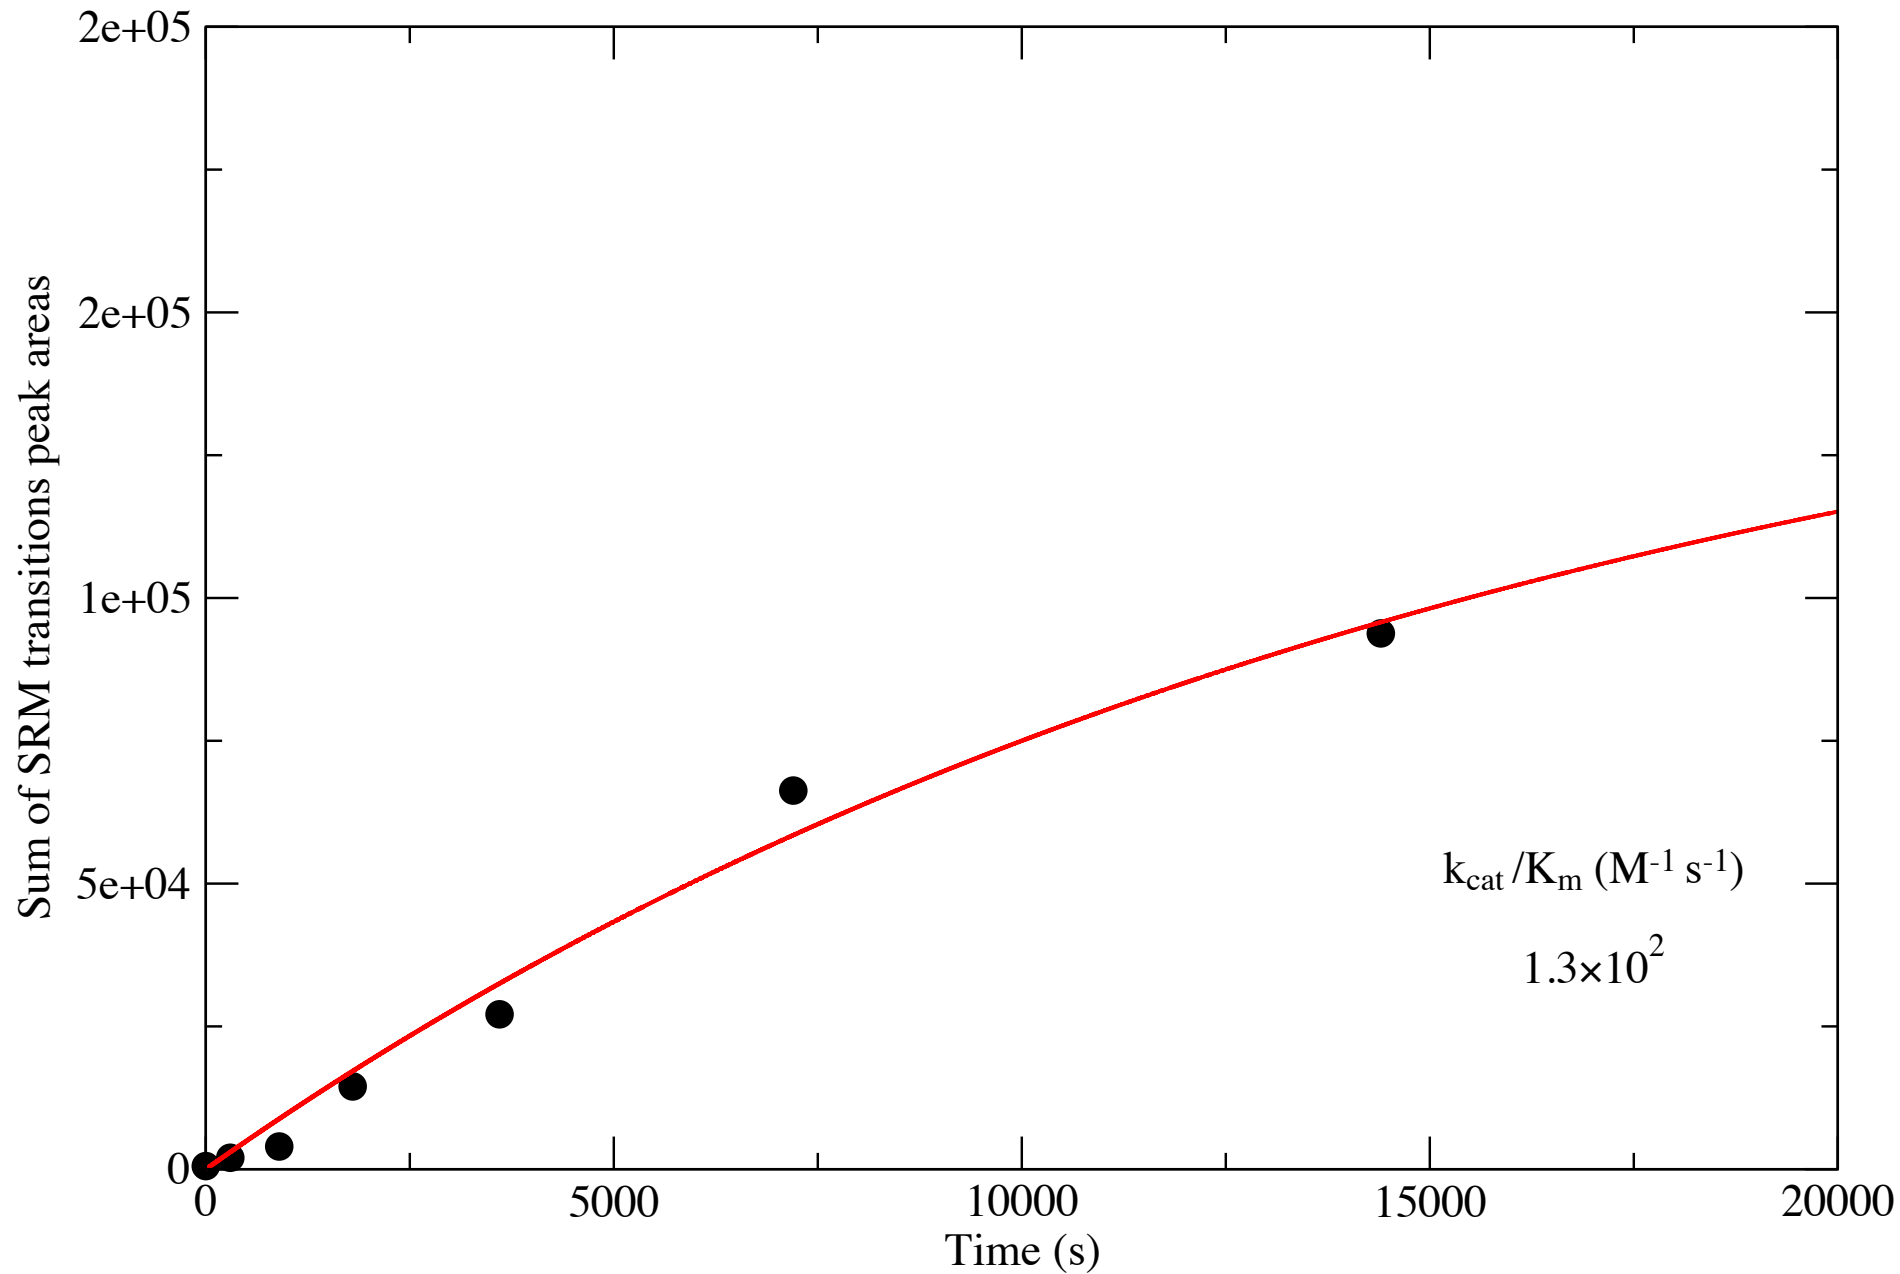

# ZFY16\_HUMAN (AFLTEQYLQTTNIK)

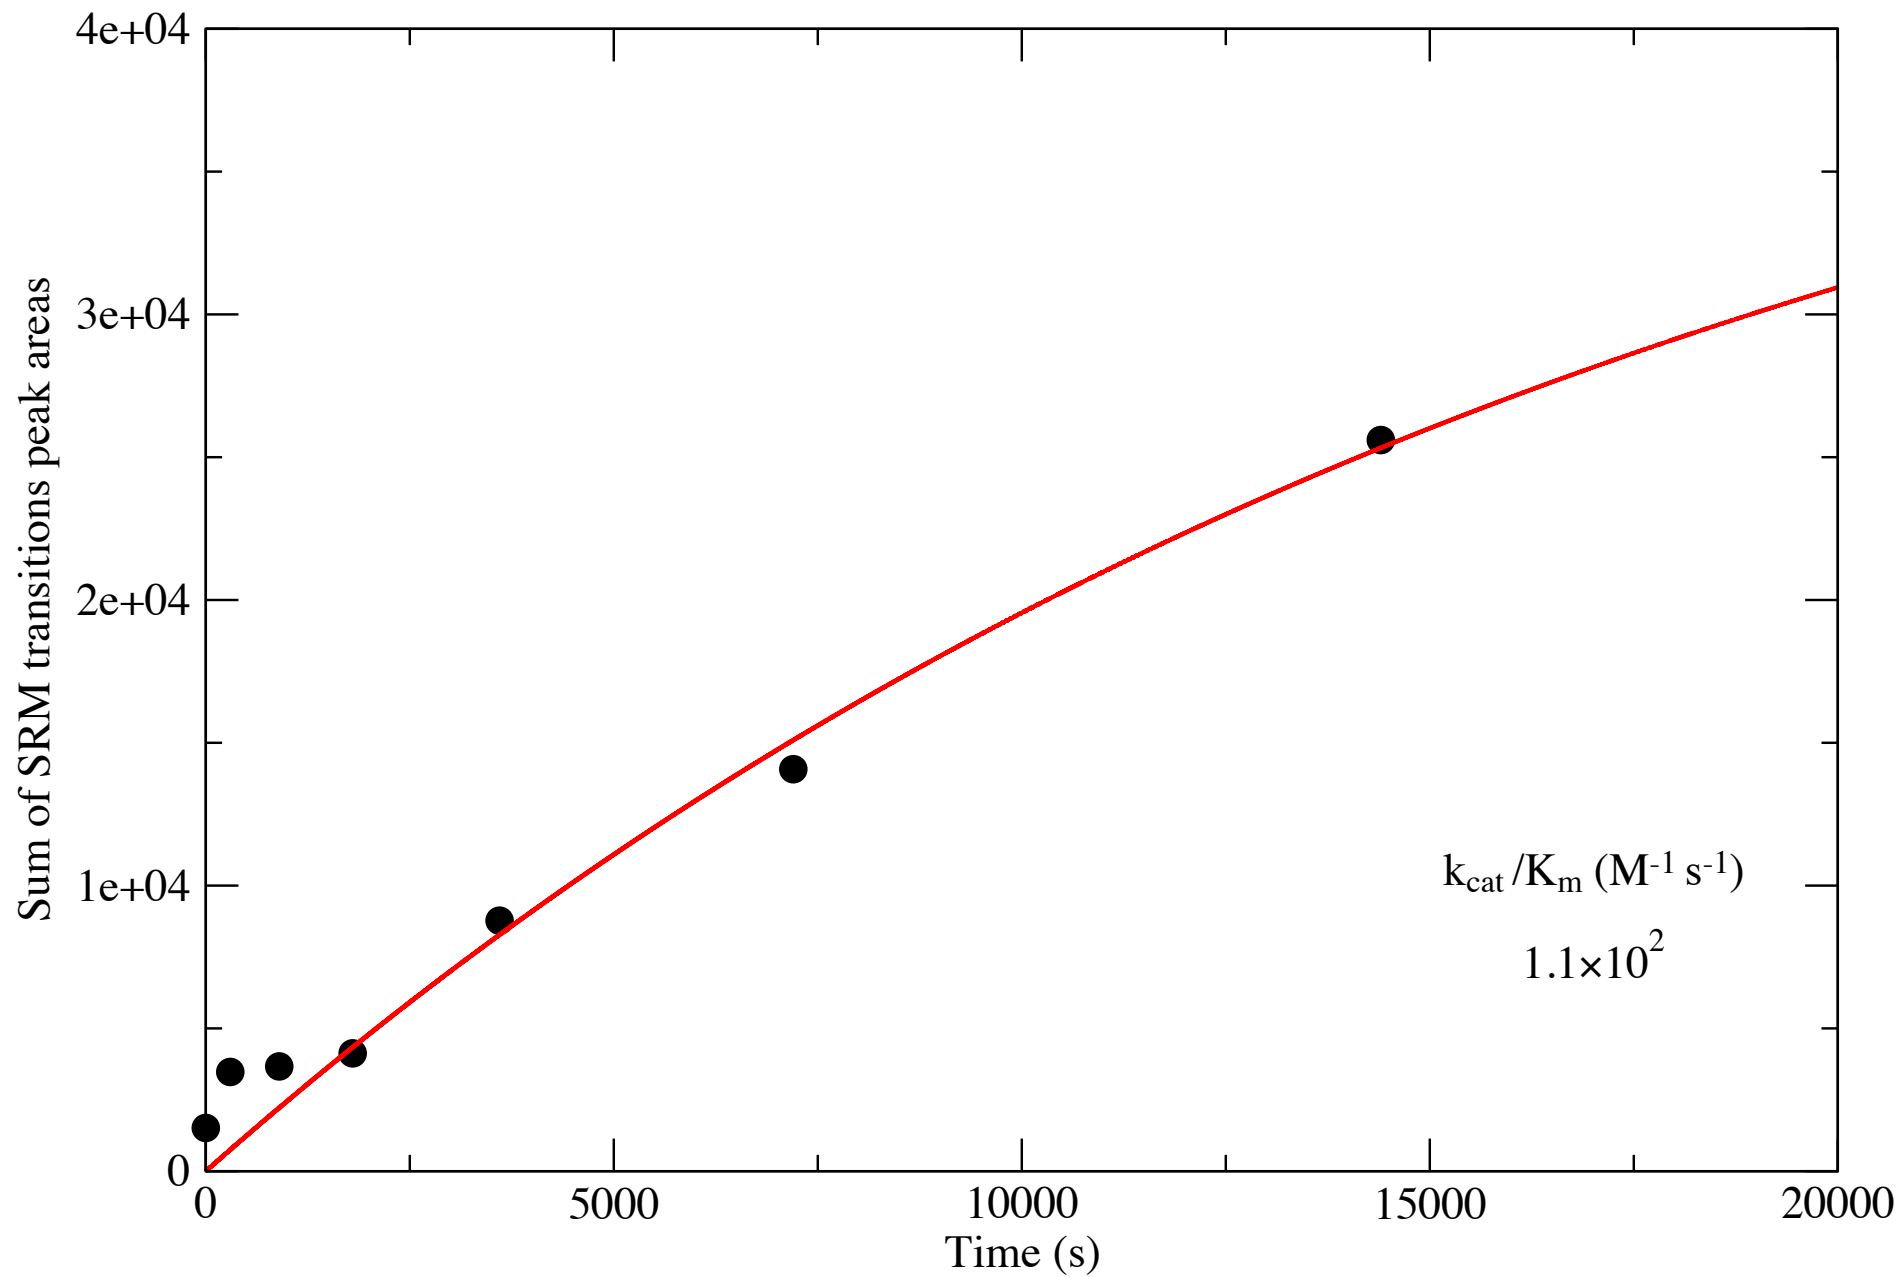

# ZN264\_HUMAN (GLGTADGVCSR)

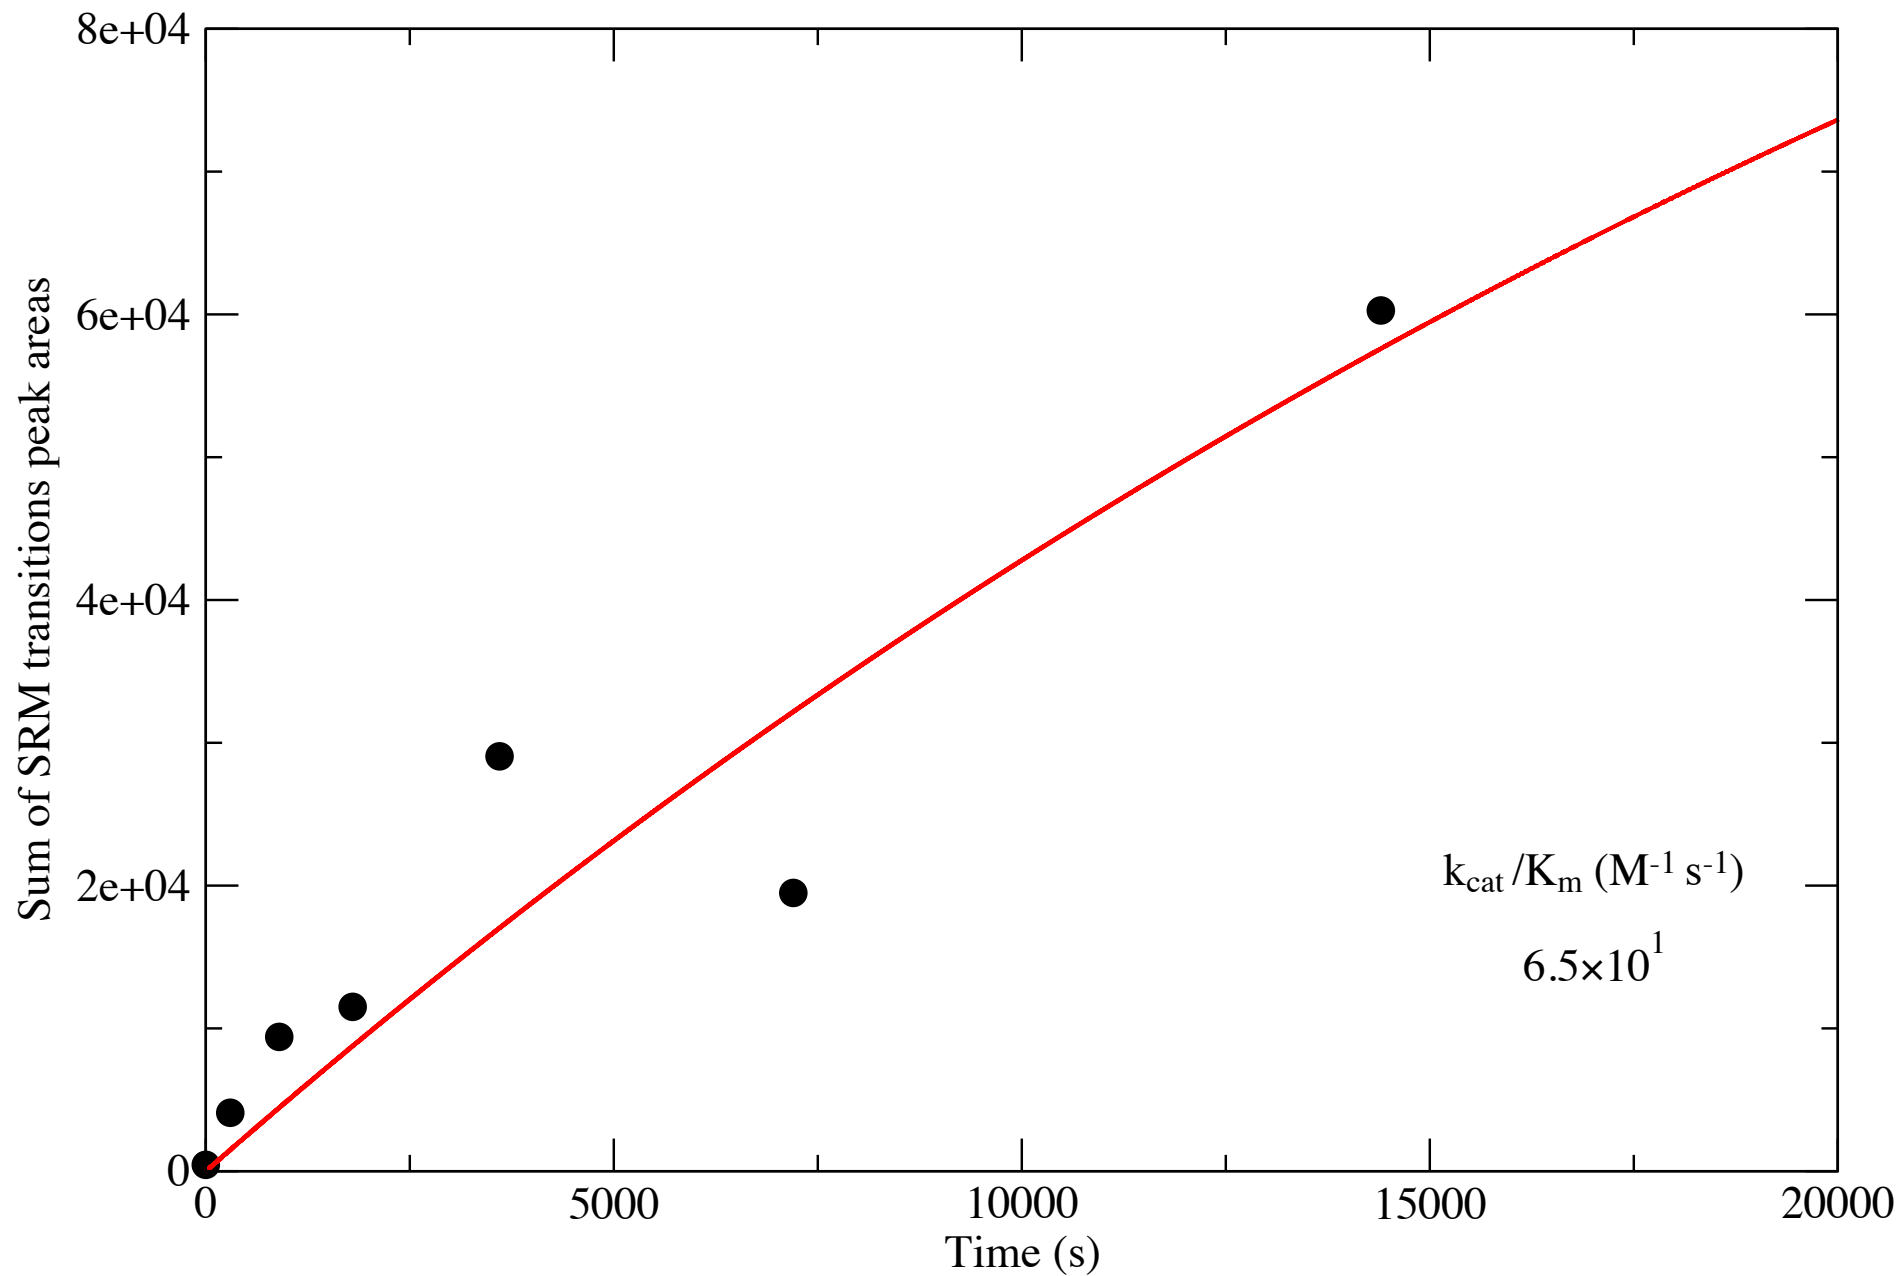

# ZN609\_HUMAN (AFDSLRLR)

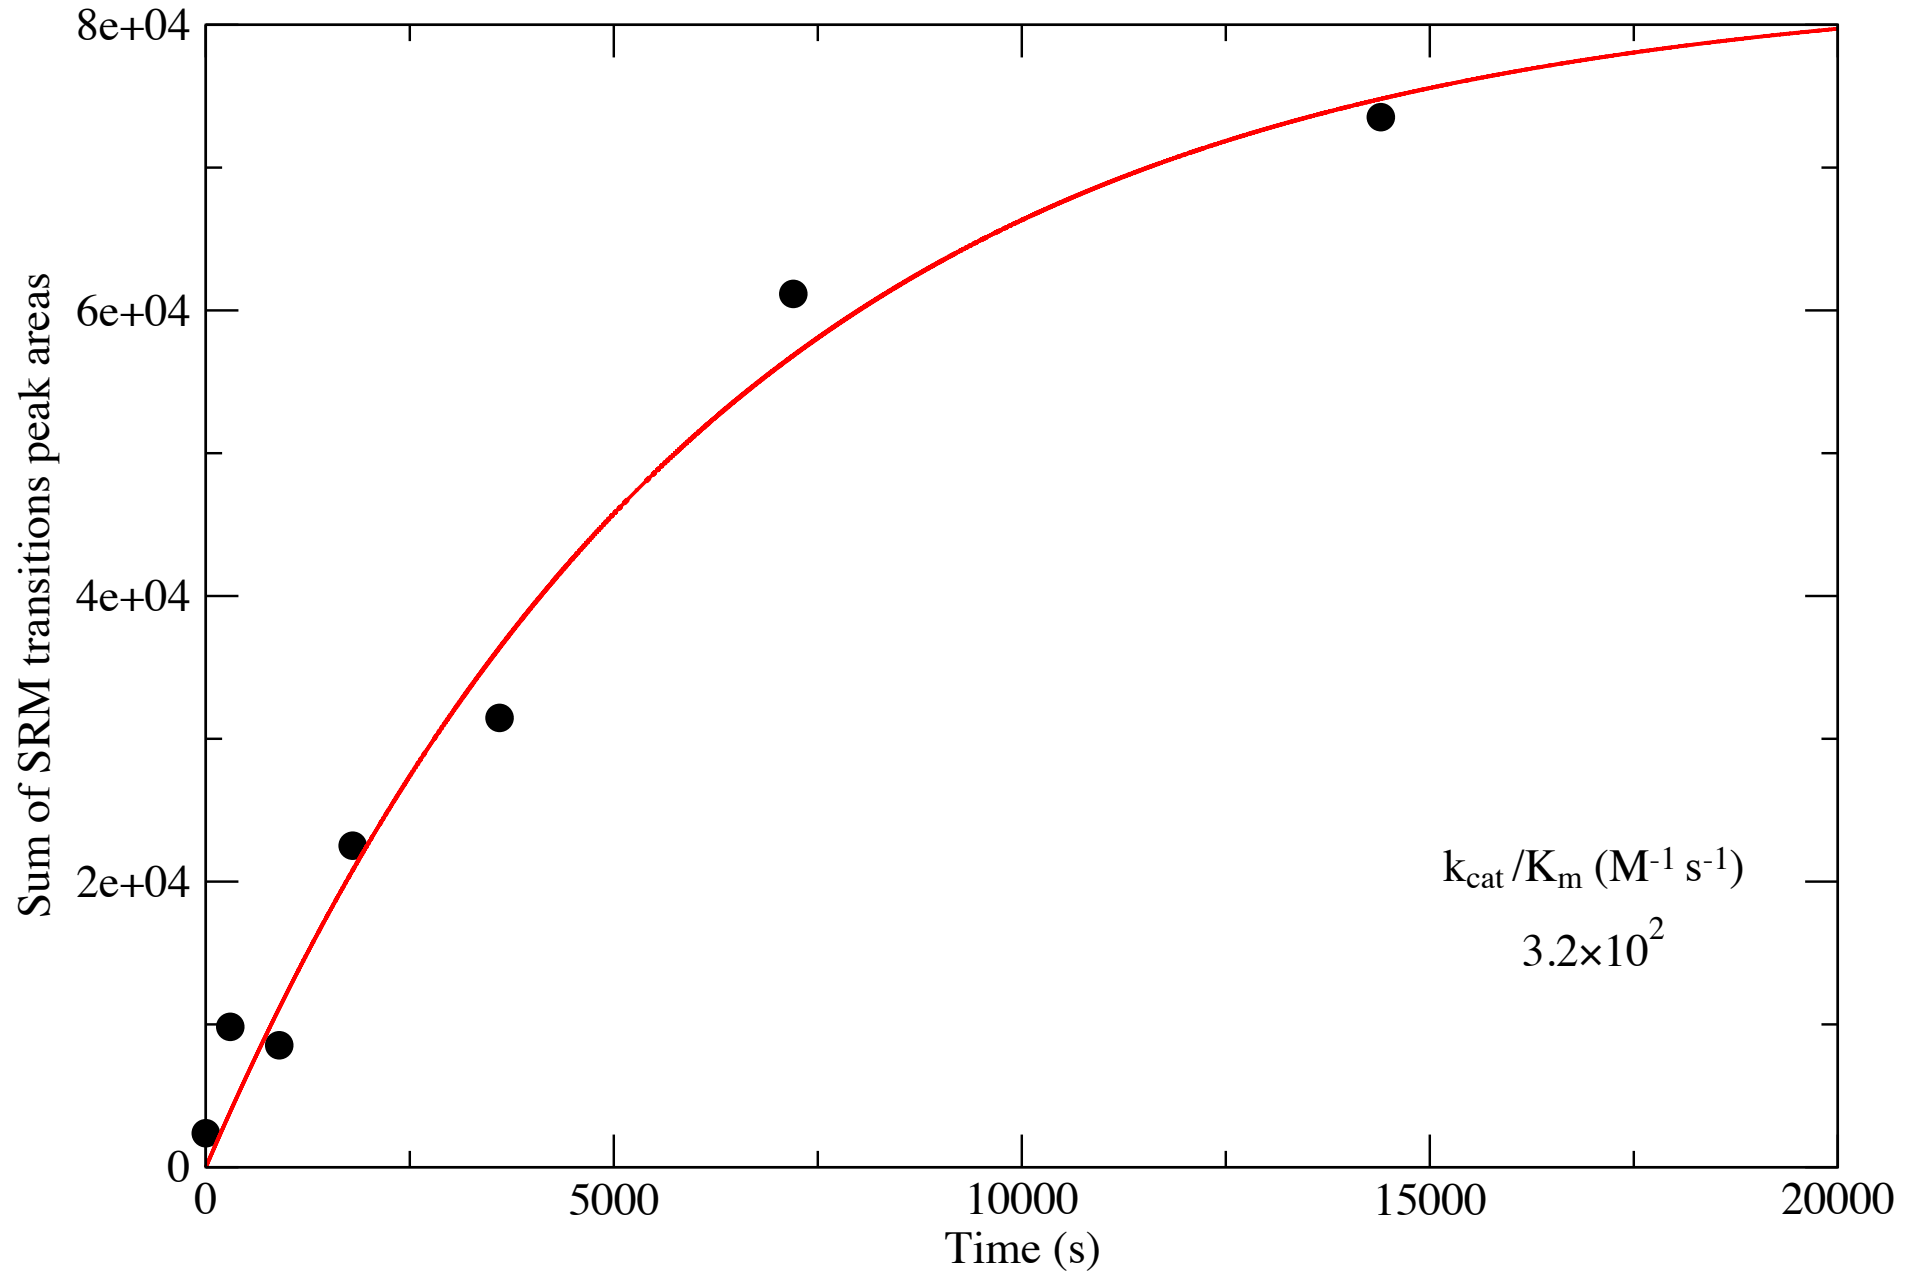

# ZN622\_HUMAN (AMNAAIQQAIK)

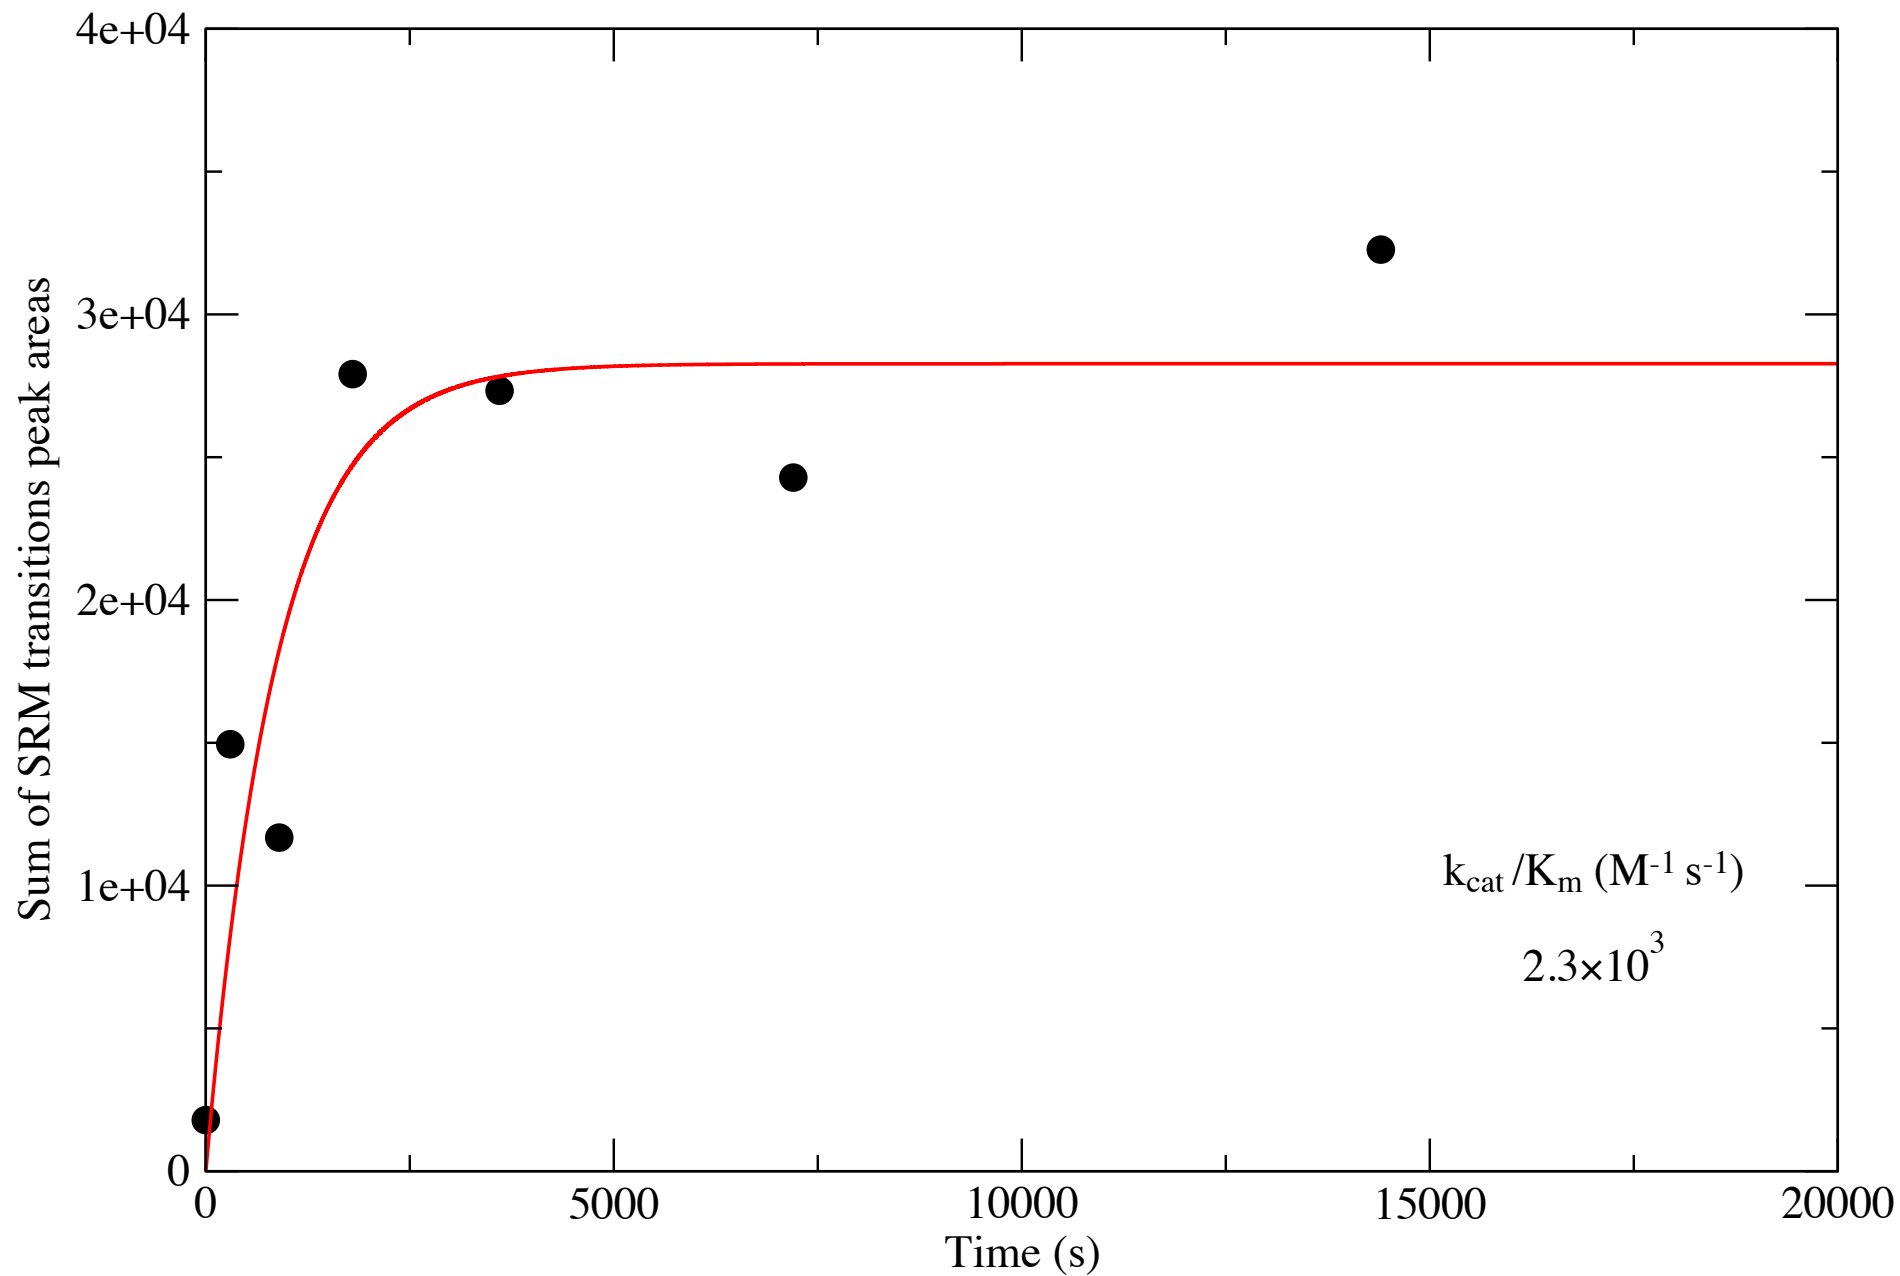

# ZNF24\_HUMAN (SILIIPTPEEEK)

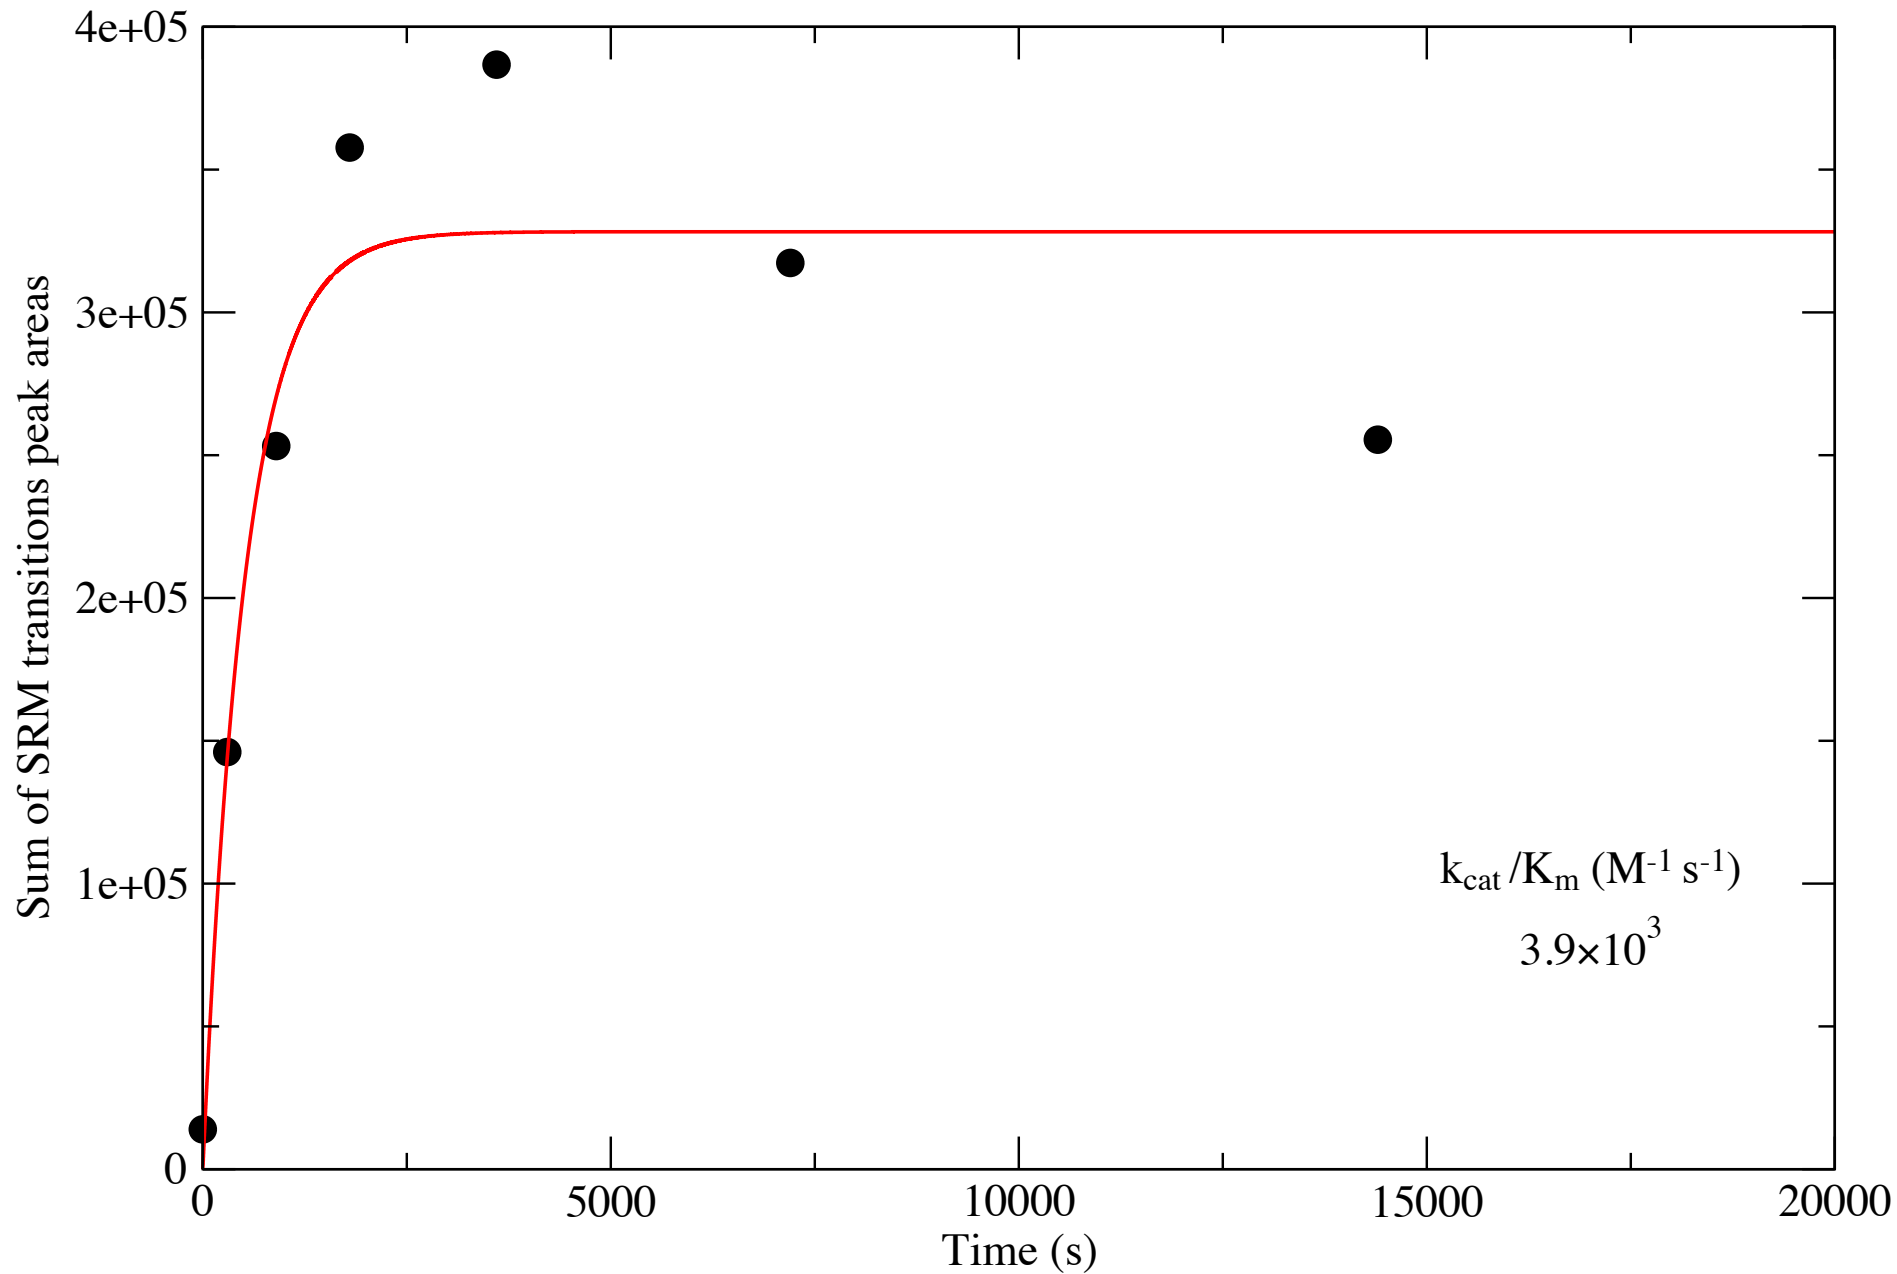

# ZNHI2\_HUMAN (NAPGSDAAELELAPAR)

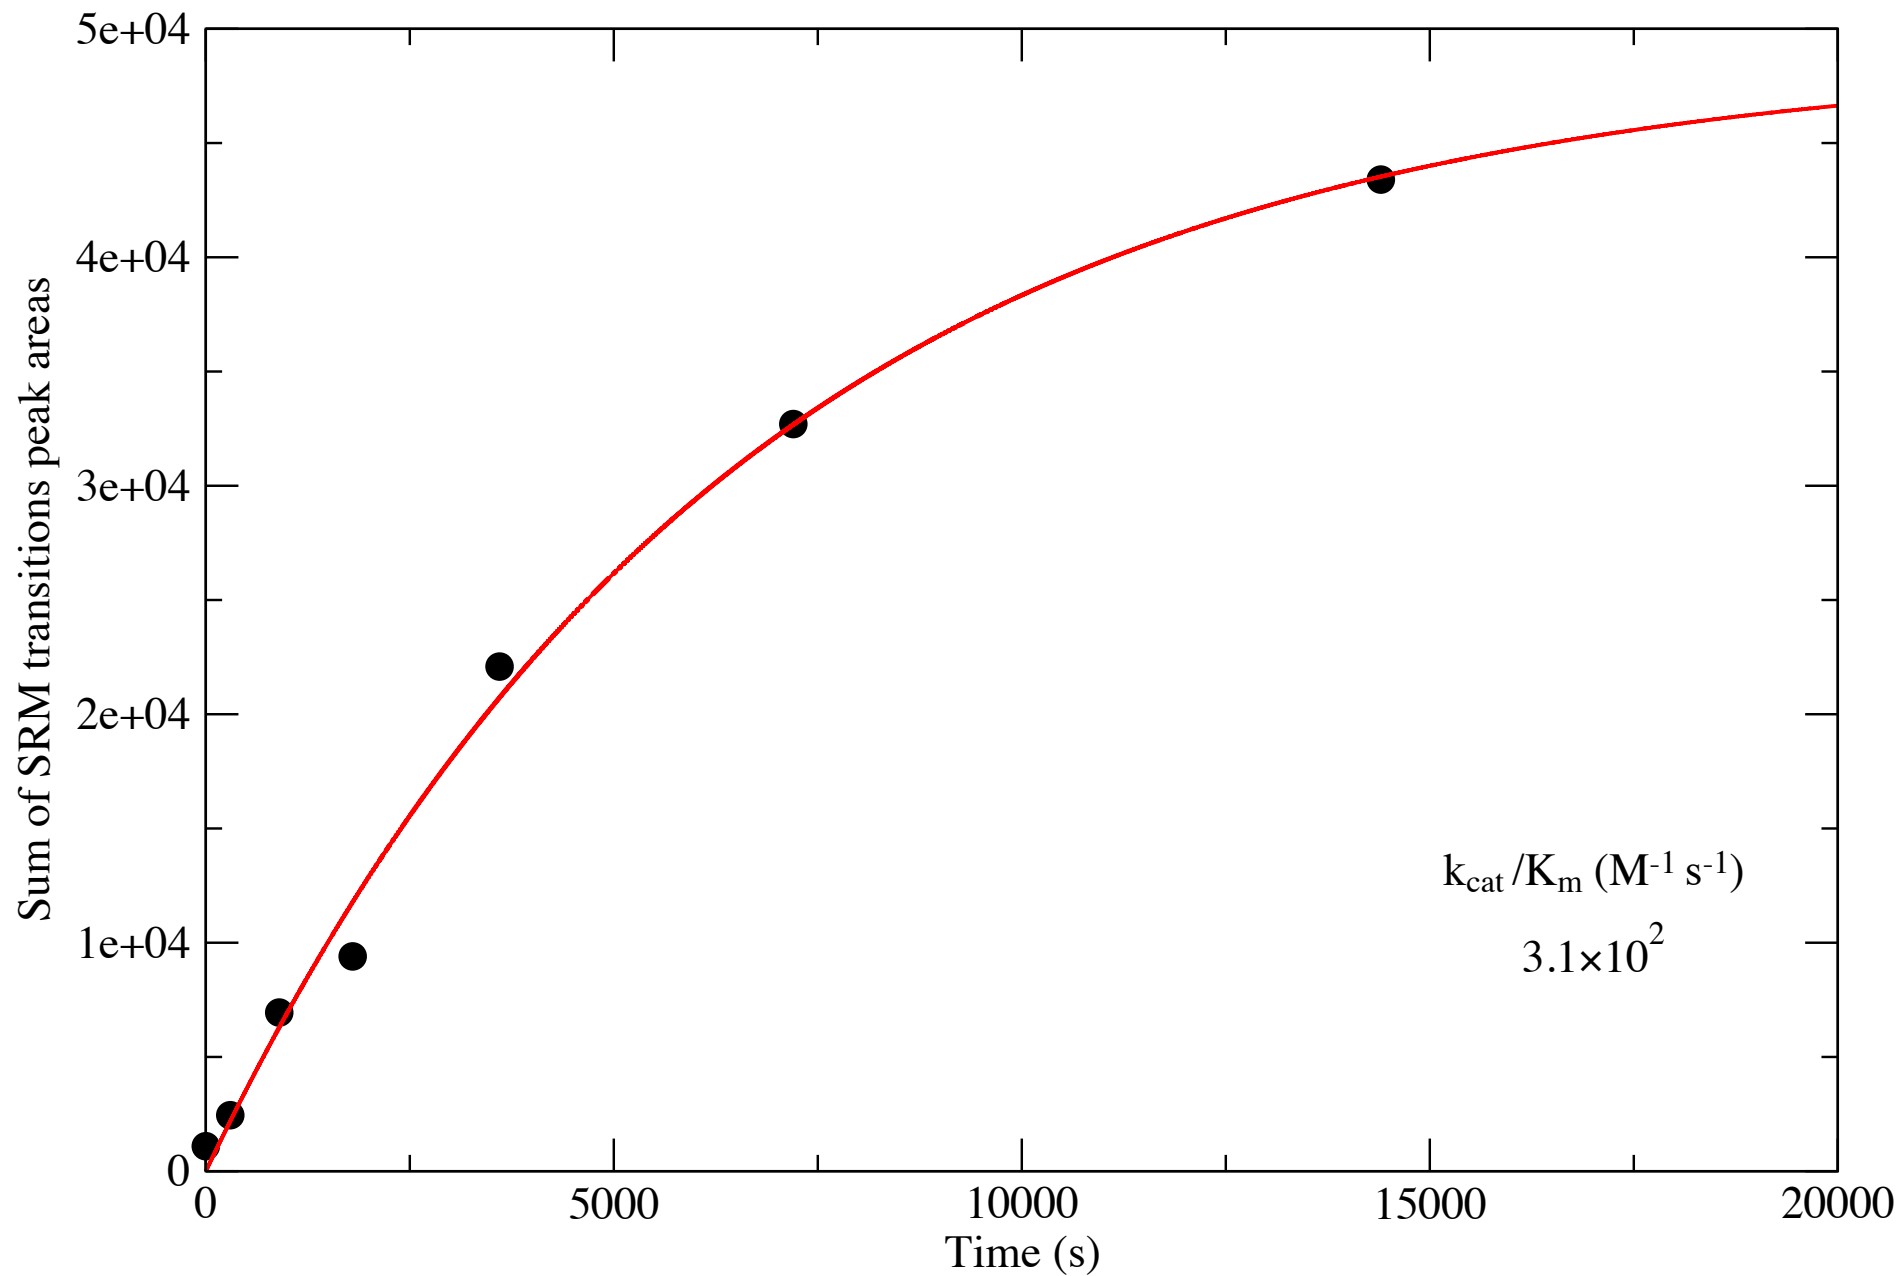

Supplement: pnas.1524900113.sd06.pdf [file pnas.1524900113.sd06.pdf]
